# Supplementary material for: Structures of ferroportin in complex with its specific inhibitor vamifeport
Source: eLife journal article supplement (doi:10.7554/elife.83053), 2023-02-28
Supplement: fig1-data1 [file Figure1.xlsx]

## Sheet: Figure 1A
	FPN-Liposomes
		experiment 1	experiment 2		experiment 3	experiment 4			experiment 1	experiment 2		experiment 3	experiment 4			experiment 1	experiment 2		experiment 3	experiment 4			experiment 1	experiment 2		experiment 3			experiment 4			experiment 1	experiment 2		experiment 3			experiment 4
	Time norm	0 μM MnCl2							1 μM MnCl2							10 μM MnCl2							50 μM MnCl2									200 μM MnCl2
	-9.98152	111.427	113.087	118.616	104.528	147.697	143.216		121.795	116.962	139.616	115.912	156.797	150.648		126.847	125.12	160.613	123.149	160.444	169.113		127.086	133.481	174.028	128.744	185.333	178.987	171.761	169.995		144.132	143.952	197.989	141.482	198.232	202.881	181.866	186.881
	-9.91422	109.669	113.471	115.579	103.248	142.101	140.323		119.791	117.203	140.998	113.039	154.745	150.555		126.2	124.48	161.584	120.094	159.889	160.449		129.261	134.882	172.345	124.155	184.952	172.983	163.613	163.166		141.157	139.561	198.732	138.231	200.196	200.823	177.596	181.07
	-9.8478	109.23	114.003	115.973	104.331	142.962	137.176		117.897	114.647	138.166	111.713	149.453	145.652		126.818	122.368	157.287	123.149	158.829	159.072		128.099	131.329	168.778	126.449	185.714	174.296	164.929	163.528		140.463	142.729	192.217	137.321	192.927	193.21	176.226	177.273
	-9.78088	108.48	110.458	116.929	107.48	140.981	138.877		116.964	113.624	135.637	112.486	146.533	143.247		124.463	121.6	155.83	120.682	155.752	157.339		126.579	130.236	167.094	126.691	183.238	175.61	162.905	161.666		137.455	137.869	195.015	137.191	193.713	203.086	174.064	180.15
	-9.71422	106.618	110.044	112.908	106.102	141.713	132.922		114.795	112.722	134.997	113.039	151.414	141.536		124.993	122.56	155.83	118.919	156.155	156.983		123.927	132.286	169.739	126.449	182.476	171.67	161.69	163.735		136.463	138.625	193.135	138.231	188.212	197.737	174.802	179.862
	-9.64757	105.196	110.015	113.358	102.854	138.915	131.986		114.247	113.474	135.3	110.055	147.126	137.697		121.019	120.416	151.981	119.154	154.793	156.83		122.586	130.441	165.731	124.396	179.048	170.356	159.565	161.769		132.661	134.701	189.943	137.321	187.033	197.325	173.168	176.352
	-9.58115	108.04	108.922	111.305	106.988	137.236	133.177		113.56	111.098	133.715	108.619	145.849	139.593		121.607	118.88	150.673	121.739	153.784	155.454		121.544	128.459	164.449	127.053	181.333	169.606	163.057	162.028		133.521	135.241	187.888	137.711	183.694	194.856	173.959	174.741
	-9.51422	107.187	108.538	113.105	107.283	133.922	134.028		111.502	112.241	132.771	110.387	145.985	136.586		121.313	118.208	149.664	120.564	151.917	154.332		124.911	126.922	165.691	126.329	177.333	166.604	159.413	159.027		132.86	131.497	187.538	135.891	185.265	194.239	170.322	173.418
	-9.44755	103.542	107.031	111.558	107.579	133.104	133.092		113.56	113.023	131.49	108.066	146.35	137.373		120.43	118.848	147.197	121.034	149.294	154.434		123.451	128.118	164.409	125.966	173.905	166.229	159.109	159.027		133.851	137.617	184.696	138.752	184.086	192.798	168.951	174.338
	-9.3809	104.473	106.677	109.505	106.594	133.706	131.561		115.29	111.459	131.254	110.166	143.476	137.512		120.224	118.528	147.422	116.334	150.303	152.803		124.762	125.863	164.248	124.034	177.143	168.668	158.097	159.131		133.752	134.737	184.04	133.68	183.497	191.358	168.002	169.275
	-9.31422	103.283	107.415	110.714	104.429	131.167	130.54		112.462	108.992	131.794	110.276	141.88	136.91		121.166	117.888	146.3	121.034	150.303	153.823		123.123	125.145	161.162	124.396	174.286	164.728	154.2	159.027		130.909	132.613	177.219	135.111	184.872	190.535	166.684	170.944
	-9.24757	106.851	103.781	111.305	104.035	132.544	130.923		111.529	109.985	131.659	110.718	142.381	138.992		120.224	117.472	145.889	117.979	148.032	151.478		121.484	125.384	160.281	123.792	178.286	163.977	154.099	155.872		129.289	132.109	179.099	136.151	183.694	189.712	165.525	169.333
	-9.18087	103.826	106.411	108.971	105.807	130.22	130.753		109.964	107.97	129.434	107.735	141.241	137.558		119.37	115.744	145.516	120.212	149.899	152.243		123.004	126.238	161.964	127.053	176.381	161.163	152.783	157.32		133.355	134.701	178.094	134.72	177.996	187.86	163.627	175.086
	-9.11422	102.921	104.284	108.436	105.02	129.617	131.433		110.568	108.812	130.378	110.829	143.841	137.697		119.929	114.528	147.197	118.919	145.106	153.058		119.16	123.608	159.118	126.208	170.476	164.916	151.771	155.044		130.975	129.878	171.972	135.631	177.996	185.391	162.625	170.196
	-9.04755	103.102	104.874	110.405	106.693	128.541	129.009		114.137	109.293	128.793	108.95	141.423	137.512		121.107	114.624	148.094	118.096	145.106	154.128		122.11	123.574	159.118	126.329	174.476	162.664	151.164	156.441		130.645	128.906	176.388	136.801	183.497	187.654	165.735	167.319
	-8.98088	106.231	106.972	109.477	103.346	129.445	131.944		112.49	107.068	129.939	111.05	139.051	136.078		117.221	114.88	145.329	115.746	146.014	148.522		122.02	121.831	158.357	124.155	174.857	164.728	151.012	158.458		130.942	134.017	175.208	134.59	174.263	183.951	161.571	167.894
	-8.91422	102.715	103.072	109.983	105.906	129.143	130.242		111.858	108.842	129.467	109.945	138.184	135.939		118.899	114.016	147.123	117.509	142.684	150.459		122.944	122.275	159.479	124.396	170.667	161.726	153.745	158.872		127.603	133.693	173.415	136.671	179.764	183.951	161.518	167.549
	-8.84755	102.275	103.87	109.449	104.035	127.292	131.944		112.215	108.03	126.736	108.398	137.454	138.159		118.752	112.288	144.469	116.569	144.147	152.497		122.646	121.421	159.479	120.652	172.381	163.227	150.101	156.492		129.554	126.602	170.748	133.55	175.049	183.951	159.304	170.426
	-8.78088	103.671	103.161	108.746	104.823	127.249	128.584		109.031	107.188	127.377	110.497	136.907	137.234		118.811	112.032	140.994	119.741	143.088	146.993		121.961	122.31	157.315	125.242	169.143	159.099	150.152	153.44		130.512	131.281	171.535	132.38	174.656	181.893	158.988	167.779
	-8.71422	103.232	103.279	110.63	103.543	127.981	130.71		112.298	106.045	128.22	106.077	136.268	138.575		117.28	114.528	142.601	116.216	140.061	151.325		118.862	123.403	160.561	124.879	166.095	159.099	149.19	153.802		128.992	131.965	172.409	133.68	174.46	185.597	158.303	167.549
	-8.64755	103.102	103.279	108.099	106.693	128.325	131.433		110.102	105.474	126.669	107.735	137.181	135.106		118.987	112.8	144.731	117.979	142.432	149.796		121.305	123.061	158.477	121.498	168.952	157.974	147.976	154.061		130.215	132.937	167.906	131.99	173.87	179.835	162.045	167.261
	-8.58108	104.783	101.477	108.971	105.906	128.325	130.2		107.576	107.188	129.164	105.635	136.861	136.633		119.017	111.296	142.601	115.629	140.363	147.808		118.594	120.909	158.116	120.531	169.143	162.852	148.279	153.182		127.074	127.106	170.004	135.891	173.477	182.099	159.304	168.124
	-8.51442	103.128	102.629	106.384	106.496	127.723	129.987		109.223	108.932	128.254	106.409	136.77	134.228		117.486	111.648	141.442	114.924	141.524	147.961		119.487	120.772	154.269	124.638	169.143	161.163	147.976	153.906		127.603	130.922	169.348	131.079	170.334	182.305	161.993	165.593
	-8.44748	104.628	102.393	108.352	104.724	128.627	130.072		107.713	106.376	127.04	108.508	135.903	134.921		117.015	111.296	140.695	114.571	140.464	146.738		118.623	120.499	157.114	120.652	168.571	158.724	149.089	152.923		128.331	127.034	169.655	131.99	173.084	179.424	158.092	168.239
	-8.38108	102.353	101.713	107.621	104.035	126.905	132.582		111.282	104.511	126.365	106.74	136.314	135.939		116.044	114.592	140.546	113.043	141.978	146.687		119.1	120.909	155.15	121.377	167.619	158.912	148.482	154.216		127.537	129.662	167.818	132.12	175.049	181.276	157.775	164.499
	-8.31415	102.301	102.452	106.609	104.232	126.862	131.519		107.604	106.677	126.231	104.309	134.398	135.754		116.897	111.36	137.93	113.043	140.565	145.107		118.832	121.216	156.313	118.116	167.048	159.475	145.192	152.923		129.455	130.346	167.512	133.42	171.906	179.835	156.774	165.65
	-8.24748	100.362	101.123	106.749	105.315	126.001	130.285		108.509	105.203	124.41	105.304	133.987	132.701		116.25	111.744	137.22	113.278	143.643	147.146		119.845	120.567	152.906	121.377	167.619	158.161	145.901	154.371		126.711	127.754	165.894	129.909	169.548	180.453	157.09	165.708
	-8.18083	102.947	102.275	104.949	106.299	122.901	127.775		111.309	105.684	124.005	106.851	135.995	135.523		115.219	112.384	139.163	115.629	138.749	147.604		117.729	119.064	152.224	122.101	165.524	159.099	146.103	149.146		127.835	129.158	167.118	130.299	170.727	179.63	155.14	162.888
	-8.11415	102.973	102.452	107.199	102.362	124.494	129.562		110.513	106.075	125.59	105.525	136.588	132.331		115.514	111.232	138.004	113.278	141.473	144.19		117.163	120.875	153.267	119.203	162.667	158.537	148.381	150.698		126.38	124.406	164.539	131.339	173.084	180.864	156.458	168.239
	-8.04748	102.198	102.216	106.777	104.528	127.335	129.094		109.553	105.353	124.107	104.42	134.717	134.135		115.425	110.56	138.117	112.456	139.758	144.75		118.206	118.62	151.383	121.498	167.048	155.159	146.964	149.871		125.686	127.79	167.774	130.299	174.067	177.572	157.986	164.96
	-7.98083	103.051	103.25	105.343	104.724	128.153	129.902		108.674	105.504	125.185	105.083	135.858	134.829		118.457	109.984	138.602	113.749	140.969	146.534		118.147	120.43	154.188	123.551	162.095	157.786	143.775	150.388		125.223	129.23	165.282	130.429	170.53	179.012	153.98	164.96
	-7.91417	101.991	101.004	105.062	103.74	126.733	130.753		108.784	105.624	123.432	102.099	135.675	135.615		116.573	110.336	137.743	112.691	137.437	145.719		117.431	120.362	152.184	121.014	166.476	155.722	144.939	151.837		124.099	122.498	162.484	131.73	166.994	178.395	153.031	161.105
	-7.8475	101.551	101.359	105.906	105.906	125.7	126.882		110.102	105.955	124.713	104.751	135.265	134.366		116.397	110.944	138.117	114.571	139.909	145.719		117.67	118.961	151.102	121.498	163.81	157.036	143.37	151.578		123.835	126.818	164.32	131.079	172.692	177.984	155.192	163.521
	-7.78083	101.189	102.304	104.218	102.756	124.623	129.732		105.572	104.662	122.96	105.635	134.991	132.701		116.75	110.24	136.659	114.336	143.037	146.789		116.24	118.62	150.902	122.585	163.619	160.6	146.457	150.802		126.017	126.638	162.921	130.819	171.12	177.984	156.405	163.176
	-7.71417	101.008	102.57	104.612	103.051	124.58	130.668		109.964	105.504	123.365	105.083	133.349	134.968		115.366	111.904	136.622	114.571	140.212	145.209		117.729	118.005	153.026	120.894	163.048	155.535	146.761	150.595		125.521	126.026	165.982	131.209	174.067	176.955	155.456	165.247
	-7.64748	99.819	102.452	104.837	104.724	125.398	126.84		107.906	103.91	122.825	105.083	135.721	134.783		117.251	111.584	137.743	112.808	138.496	146.228		117.998	118.449	154.709	122.705	168	158.349	147.824	150.698		122.876	121.634	164.757	129.779	168.173	177.16	154.507	165.305
	-7.58083	99.121	101.92	105.343	103.051	125.872	130.923		108.757	103.729	123.938	106.077	133.44	131.915		114.218	109.856	138.49	112.573	138.396	146.075		117.223	118.483	152.144	119.444	161.905	153.846	145.091	152.975		123.603	125.054	163.227	130.299	169.352	175.514	153.875	164.442
	-7.51415	104.188	102.836	104.471	100.787	125.097	127.478		108.564	104.391	123.601	106.409	135.493	136.216		116.662	109.664	136.659	114.806	139.506	147.197		120.083	118.381	153.828	118.841	163.048	155.91	146.711	153.182		123.901	122.174	161.653	133.29	169.548	177.572	154.085	164.154
	-7.4475	100.62	101.95	103.656	103.937	127.938	126.499		105.874	104.241	122.825	105.414	132.801	133.302		116.456	109.152	141.181	114.219	140.01	144.343		117.104	119.747	152.585	118.961	165.905	160.038	145.395	151.681		124.132	125.594	164.495	131.469	167.976	175.514	154.718	164.902
	-7.38083	100.62	99.3796	103.487	102.461	126.69	127.308		106.121	104.992	123.769	105.746	136.77	137.743		114.572	111.264	138.266	114.101	138.042	143.629		118.236	117.492	151.263	121.498	164.19	155.722	144.889	152.354		121.223	125.018	164.408	133.03	166.208	176.337	153.875	162.888
	-7.31417	102.275	102.127	103.656	104.035	124.752	128.966		106.561	103.759	123.196	104.53	130.657	135.338		116.014	109.056	136.958	112.691	139.556	143.629		115.971	118.927	152.465	118.237	164.571	153.659	143.623	151.009		124.298	124.514	164.495	129.649	166.012	179.424	154.507	166.571
	-7.24747	100.801	100.916	103.712	103.937	125.743	128.158		108.509	104.06	121.679	104.972	134.854	134.551		115.337	111.008	137.22	112.573	140.767	144.495		118.474	118.483	153.066	118.841	163.048	155.91	147.217	149.457		122.116	123.542	163.752	131.469	170.727	176.132	154.085	164.384
	-7.18082	101.422	101.034	104.556	105.709	122.988	125.904		109.855	103.489	124.68	105.746	132.984	135.939		115.514	109.792	137.818	117.509	136.377	145.464		117.491	118.176	152.866	119.928	164.571	154.221	141.953	150.75		122.777	123.326	164.845	131.99	169.352	178.189	156.141	164.039
	-7.11433	101.68	99.5864	103.543	101.772	125.7	125.946		108.262	104.421	122.151	107.735	131.934	135.661		116.78	111.008	137.668	111.516	138.143	143.833		117.342	117.526	153.226	121.014	165.524	156.098	145.192	152.561		123.471	118.251	165.195	131.469	168.959	170.782	151.502	164.212
	-7.04742	100.181	99.7637	103.206	105.02	124.107	129.009		107.906	105.113	121.848	104.862	130.885	135.8		116.485	109.568	136.024	113.749	138.749	147.248		116.329	120.157	149.78	116.425	163.238	156.66	144.18	151.992		125.818	123.974	163.008	127.828	169.155	173.251	150.975	164.845
	-6.98075	101.887	98.4638	103.628	101.969	125.656	130.072		106.396	102.947	122.421	105.414	134.58	131.684		116.014	111.04	136.734	115.159	138.143	146.177		115.107	117.8	151.623	120.652	164.762	156.098	145.749	149.56		123.669	119.978	161.653	130.429	170.334	173.251	153.453	166.398
	-6.91408	99.2761	99.9705	103.487	102.854	126.819	128.499		106.231	103.669	124.983	104.42	132.892	134.32		114.424	109.152	136.659	115.981	137.235	147.197		117.521	116.57	150.581	119.203	163.238	158.349	143.32	151.423		124.595	120.302	163.883	127.568	164.833	177.778	154.982	161.335
	-6.84742	99.1727	100.798	102.672	103.346	123.762	128.286		108.153	103.97	123.365	104.641	132.71	132.562		113.777	109.952	135.912	113.161	138.951	144.75		114.809	117.834	152.144	120.411	160.571	151.782	145.192	150.026		121.455	122.642	163.752	128.609	167.976	175.926	154.296	161.45
	-6.781	98.9142	100.473	103.29	101.87	125.269	126.584		108.866	103.098	122.488	103.646	129.836	133.673		113.188	109.088	134.716	113.278	137.941	145.617		116.538	116.023	149.699	116.667	163.429	150.281	144.686	150.44		122.612	120.446	160.735	129.129	169.548	173.868	152.662	162.716
	-6.71432	100.62	99.4387	102.418	102.362	125.915	126.031		108.153	102.617	122.623	102.541	132.436	133.996		115.779	110.24	136.286	113.161	136.579	146.84		117.461	116.262	150.822	118.357	162.286	153.659	141.903	151.216		120.893	119.33	160.909	130.429	165.029	175.103	153.189	163.003
	-6.64763	101.861	99.7932	102.306	101.575	123.547	126.329		107.576	103.098	123.095	103.978	129.653	134.551		115.926	108.864	137.892	112.456	138.547	145.668		116.716	117.492	152.505	121.618	162.476	151.97	145.04	151.061		124.231	122.534	162.659	128.999	164.833	174.897	153.4	163.061
	-6.58097	98.1644	100.798	104.162	104.035	122.428	126.117		106.67	103.669	123.331	106.409	133.668	134.043		115.838	110.368	136.809	113.514	139.102	146.585		116.299	117.219	151.383	120.048	159.619	153.659	149.696	151.267		121.983	120.374	162.659	129.779	167.191	171.811	154.876	164.672
	-6.51403	101.189	98.257	101.856	102.953	123.289	127.478		106.643	103.098	124.005	105.967	130.292	133.719		115.249	107.584	136.771	111.633	139.051	143.782		115.733	117.424	150.862	117.754	159.048	155.347	142.611	148.422		121.488	123.254	160.297	131.079	169.352	172.84	151.977	165.708
	-6.44763	99.4829	99.1728	102.503	104.429	123.332	125.138		107.055	100.15	122.589	103.425	133.622	131.545		114.307	107.744	135.351	113.631	136.226	145.362		117.908	119.474	150.982	118.237	160.762	157.036	143.927	148.474		124.694	121.994	162.265	132.64	165.422	177.16	153.295	160.644
	-6.38097	99.6381	99.4978	100.562	102.362	122.127	125.479		105.737	103.669	121.443	106.188	130.246	130.527		115.661	111.776	137.593	112.338	138.093	142.966		116.418	116.092	149.699	116.304	160.19	153.283	141.397	150.078		120.496	123.074	165.676	131.73	171.12	169.753	153.769	162.486
	-6.31403	101.37	97.3708	104.303	101.378	123.031	124.117		106.478	104	122.387	105.525	131.068	131.822		114.719	108.512	135.8	114.571	135.974	144.801		114.69	115.579	149.659	120.411	160.571	154.221	144.281	151.061		123.769	121.67	161.915	130.819	168.762	176.749	153.031	159.321
	-6.24763	97.5957	98.4047	101.828	102.165	120.362	126.074		105.682	102.737	122.994	103.978	131.022	134.736		113.247	108.224	136.286	114.101	134.864	146.738		115.167	117.526	151.503	119.565	162.857	154.409	142.662	147.646		121.025	121.094	163.402	127.828	167.78	173.251	153.558	161.623
	-6.1807	99.7932	98.9069	101.462	103.051	122.385	125.479		105.764	102.827	122.657	105.414	130.383	132.609		115.749	110.528	136.061	111.046	136.276	144.546		116.508	114.622	151.984	119.444	163.429	155.535	144.231	150.336		121.983	118.323	161.915	128.349	168.959	172.428	153.506	162.313
	-6.11432	103.051	99.1728	103.121	101.772	121.567	125.393		107.302	101.774	120.87	103.757	130.611	134.043		113.276	111.008	134.529	113.161	137.891	145.209		115.971	116.262	150.942	117.754	158.857	154.034	144.838	149.146		120.298	121.67	160.21	131.99	163.851	175.103	153.084	163.349
	-6.04737	99.0434	102.6	102.053	102.362	126.001	124.032		106.368	103.128	122.454	102.32	131.022	132.285		114.218	109.12	137.294	109.166	134.359	141.845		116.18	116.502	149.098	118.72	160.952	153.659	142.662	149.664		122.116	118.97	160.341	130.429	167.387	168.93	152.504	162.716
	-5.98072	99.1727	98.5524	103.15	101.969	123.805	123.862		106.725	102.617	122.792	104.862	127.007	134.274		114.66	108.768	135.837	111.398	134.107	143.68		117.372	115.955	150.1	118.237	160.19	152.533	144.433	147.543		120.661	121.166	158.811	126.528	166.405	170.782	154.244	162.255
	-5.91403	98.2937	99.4092	102.39	101.476	121.481	124.755		107.082	103.158	121.51	103.757	132.208	134.181		113.983	108.672	135.8	112.573	135.419	145.973		117.789	117.971	150.06	117.754	160.381	153.283	143.674	150.75		124.231	116.847	159.904	129.259	167.976	172.016	153.98	162.946
	-5.84738	100.982	101.034	102.897	104.724	121.352	124.883		107.302	102.797	119.353	104.862	131.797	131.961		114.13	107.2	136.697	113.514	134.511	141.641		118.445	116.126	149.86	116.787	161.143	155.347	142.864	151.578		121.091	122.426	161.959	131.339	168.762	173.868	152.188	162.025
	-5.7807	98.1903	98.7888	104.106	99.2126	121.481	125.053		106.176	102.045	120.6	103.094	131.022	131.221		111.098	108.64	136.173	110.811	134.309	145.821		118.772	115.34	150.461	115.821	158.857	156.098	142.308	149.302		125.223	116.667	163.139	130.039	165.619	169.753	151.555	161.507
	-5.71403	101.293	99.4978	103.768	100.886	123.762	123.65		105.188	101.023	121.814	101.989	132.391	133.534		116.102	107.296	136.099	111.046	134.057	144.088		114.72	117.048	149.619	120.048	159.048	155.535	144.231	147.646		122.678	120.014	161.871	127.438	165.029	173.868	150.343	162.543
	-5.64738	98.8366	99.7046	101.828	101.772	122.385	125.564		106.643	102.135	121.746	102.541	130.383	129.602		116.22	106.72	134.454	112.691	136.983	143.017		117.938	115.442	149.82	119.565	161.714	151.407	143.421	147.646		123.074	115.695	164.364	128.349	166.994	170.782	150.975	161.047
	-5.58072	99.5088	100.089	99.8313	100.591	123.504	124.883		108.235	101.684	121.612	104.972	129.288	132.655		113.718	108.576	133.819	111.046	136.781	146.126		115.584	118.244	150.261	116.304	158.857	155.535	141.852	147.336		125.025	118.035	162.003	131.079	166.994	170.576	151.344	164.097
	-5.51405	100.078	97.1935	101.687	101.083	121.481	121.821		105.161	100.481	120.465	101.657	129.881	132.701		114.454	106.848	136.734	112.691	134.208	144.954		116.299	115.477	149.9	119.324	156.952	151.032	143.775	147.387		121.025	118.647	161.216	128.609	162.279	172.016	151.186	161.105
	-5.44738	100.31	98.4343	100.787	101.969	121.438	124.245		105.161	100.992	122.421	104.199	130.657	130.157		112.423	107.328	133.595	113.749	131.937	143.272		113.111	116.057	147.735	117.633	157.524	154.221	141.093	148.526		123.107	121.238	159.729	127.828	167.78	173.663	149.236	158.055
	-5.38072	97.4147	97.8139	101.181	102.067	125.054	123.99		105.38	101.444	120.162	103.978	130.657	135.8		114.454	106.656	134.903	111.986	133.804	144.903		115.703	115.101	150.942	119.082	160.762	154.034	142.105	147.543		121.091	120.446	159.904	130.039	166.208	169.342	149.499	161.335
	-5.31405	97.7766	98.4343	99.7469	102.165	122.901	122.331		106.835	101.444	119.016	102.099	129.288	131.406		111.54	107.424	134.94	112.691	134.057	144.801		113.29	116.399	148.016	115.097	161.143	148.968	142.611	149.612		121.488	118.97	159.86	129.259	161.69	172.634	153.295	162.486
	-5.24738	96.7425	97.9616	101.35	99.311	123.719	126.712		103.294	100.692	119.454	101.657	127.92	133.996		112.953	107.872	134.791	111.163	132.341	141.386		115.018	117.936	149.058	115.821	155.619	152.72	143.269	148.888		119.008	120.77	161.74	126.528	165.422	169.753	152.504	160.472
	-5.18067	99.3278	100.384	100.787	102.362	122.6	123.692		105.298	101.504	118.847	103.978	133.029	130.759		112.246	106.24	134.305	111.163	133.602	143.221		116.24	114.793	150.22	116.184	156.381	154.784	147.166	148.319		119.901	114.615	159.467	125.748	164.833	170.165	152.188	162.486
	-5.11402	100.259	99.3501	101.125	101.181	124.107	122.629		104.639	101.173	121.274	104.309	130.109	131.915		112.658	109.024	135.987	111.868	134.813	145.515		114.213	115.887	149.299	114.855	156.571	152.908	143.37	150.543		122.083	117.243	157.586	129.389	166.405	172.016	151.397	160.299
	-5.04735	100.62	99.2614	99.7469	100.591	120.362	124.543		101.784	100.481	117.937	103.646	128.285	133.765		111.51	107.488	133.782	109.988	134.662	142.457		116.269	116.741	148.898	117.029	162.095	154.409	140.081	150.233		123.14	122.498	157.98	124.707	166.994	169.547	152.609	163.119
	-4.98095	97.363	96.4845	101.8	100.394	120.749	121.395		103.651	100.902	121.173	102.873	127.6	131.73		115.749	105.92	136.136	108.578	134.813	143.374		114.243	115.374	145.651	115.942	158.857	151.407	143.168	148.422		119.24	116.451	160.035	127.958	159.921	171.811	151.397	162.601
	-4.91402	98.3195	98.6115	99.775	100.787	121.567	121.14		105.517	100.632	118.712	102.099	130.018	132.424		113.512	108.832	135.538	110.693	132.392	141.743		114.064	115.545	148.697	116.425	157.333	151.595	142.763	146.405		119.769	120.482	159.51	127.048	164.637	169.547	150.923	159.264
	-4.84735	98.3454	98.4047	100.647	101.476	123.935	122.799		102.91	100.15	119.656	100.552	130.383	129.648		110.156	106.624	136.286	112.573	132.24	145.923		114.571	114.793	150.541	115.338	159.048	154.034	141.245	148.163		118.413	120.986	159.685	126.918	161.886	169.547	154.507	162.486
	-4.78068	99.0693	98.3161	99.8594	101.575	119.931	120.63		104.804	99.7594	121.173	102.32	129.927	129.232		114.042	107.936	135.426	112.926	134.006	143.527		114.779	114.622	149.098	113.889	158.095	152.158	139.626	149.664		119.438	119.69	160.429	127.438	164.047	170.782	151.555	161.91
	-4.714	96.8718	97.1344	97.8909	101.181	120.491	121.565		104.612	100	119.858	103.094	129.106	134.181		111.304	107.296	134.305	113.514	136.075	142.253		113.439	114.998	151.784	113.285	157.714	152.345	141.599	148.681		117.587	119.114	159.554	130.299	164.44	167.695	150.237	165.478
	-4.64735	98.8108	97.6957	100.534	101.969	123.805	124.628		105.215	102.256	119.285	100.994	129.197	132.146		111.54	107.84	133.333	114.101	132.593	144.597		113.051	115.306	150.02	115.459	156.571	151.782	140.385	150.75		121.223	121.922	158.898	127.178	160.707	172.222	152.293	165.19
	-4.58067	98.9142	97.0753	100	102.461	121.868	123.564		104.063	101.233	118.105	103.094	131.296	131.129		112.099	105.984	133.707	109.401	135.318	143.323		114.66	113.973	149.94	116.425	158.476	152.533	142.713	145.732		120.364	121.058	158.767	128.739	162.672	168.313	150.659	161.795
	-4.51402	97.5698	98.4934	100.956	101.083	120.491	122.586		104.721	100.421	121.005	102.21	128.057	131.73		112.982	107.36	134.454	111.633	133.451	143.221		114.809	116.126	147.335	113.889	156.952	154.409	140.688	148.939		120.298	115.335	157.63	126.788	165.422	170.37	149.499	163.924
	-4.4475	97.001	98.1093	99.0439	102.953	120.146	123.905		106.231	102.105	119.117	103.536	127.099	132.285		112.805	106.432	133.857	111.868	134.612	143.782		116.359	114.144	145.972	115.7	157.524	154.034	139.98	147.801		120.893	115.767	157.105	126.398	163.851	167.078	150.395	159.724
	-4.38083	96.7425	98.1093	101.209	102.165	123.935	123.182		105.408	103.489	119.15	102.21	128.969	132.007		111.834	105.952	132.922	111.516	133.098	140.061		114.124	114.247	148.056	115.821	156.381	153.471	139.524	148.06		119.438	116.451	157.455	122.757	163.851	170.988	153.137	157.595
	-4.31417	97.9576	97.873	99.4938	100.689	121.266	119.566		104.831	100.782	117.296	102.21	129.151	130.342		112.511	105.312	133.558	109.518	133.956	144.19		116.21	114.998	147.655	113.768	156.952	150.281	141.7	148.733		123.008	117.315	156.668	126.918	161.886	170.37	148.023	160.932
	-4.2475	97.363	96.6322	100.562	102.854	121.653	120.459		105.71	101.263	118.611	102.431	128.102	133.349		111.834	108.224	135.575	109.518	131.13	139.755		115.793	114.827	148.938	115.7	157.143	154.034	143.168	148.267		117.521	114.975	159.904	123.667	159.136	168.519	150.659	160.242
	-4.18083	96.7425	96.1004	99.9719	104.823	120.319	123.224		105.325	101.053	120.701	102.21	129.06	133.117		111.098	107.904	133.445	110.811	132.846	142.966		113.945	114.213	150.22	114.734	154.667	155.347	141.7	146.87		121.653	116.487	160.953	128.999	161.493	163.58	152.03	159.436
	-4.11417	98.3713	97.6071	101.04	102.953	122.514	121.778		103.486	101.865	119.083	102.762	127.6	131.545		113.806	107.552	133.221	109.988	134.662	141.794		112.783	116.126	148.136	115.821	158.286	150.094	141.549	146.767		122.545	117.675	159.379	125.618	158.939	171.399	151.028	161.565
	-2.39618	106.67	108.508	111.614	95.374	118.855	105.019		113.89	116.902	129.434	98.453	127.828	113.275		125.964	120.448	149.29	105.17	132.997	121.254		127.384	128.562	161.283	115.58	111.619	110.507	141.144	127.367		136.066	133.873	167.381	121.717	115.128	121.399	149.288	139.241
	-2.35293	105.843	108.951	113.245	96.2598	118.984	105.232		114.988	115.068	128.624	98.3425	131.296	112.997		125.876	120.192	147.123	105.993	133.703	119.623		129.499	126.614	158.677	114.493	115.238	110.882	141.447	125.142		135.57	136.825	166.55	123.147	118.664	121.605	151.713	135.673
	-2.3097	104.576	109.158	113.526	94.4882	118.855	106.338		115.756	114.797	129.096	97.4586	129.197	112.951		128.172	120.576	141.891	106.933	131.382	119.929		126.847	125.726	159.118	115.7	114.857	107.88	139.929	125.815		134.744	135.709	170.354	124.317	117.289	124.691	149.868	138.147
	-2.26647	108.273	107.829	112.542	97.5394	120.706	103.615		116.058	116.602	128.557	98.3425	129.106	112.627		123.285	121.344	144.357	106.11	135.116	120.234		127.592	125.726	160.16	116.425	114.095	106.754	137.551	124.47		136.165	136.825	169.567	126.398	115.324	124.074	147.232	137.86
	-2.22325	105.817	108.479	112.261	96.6535	121.093	102.807		115.537	115.218	127.95	101.989	127.464	115.032		126.229	118.304	145.777	105.17	132.492	120.336		130.036	127.639	160.601	116.908	114.476	108.443	139.423	126.953		135.471	133.981	171.185	123.667	113.949	123.868	148.867	135.386
	-2.18002	104.912	109.306	112.683	98.9173	120.835	103.573		116.278	115.549	129.299	100.552	127.509	112.581		125.169	119.936	143.236	105.053	131.13	120.642		126.251	124.223	160.04	117.874	112.571	109.006	137.348	124.677		133.388	136.033	166.9	123.277	114.735	122.222	149.815	137.169
	-2.13678	105.455	108.213	113.751	97.8346	119.113	106.635		112.929	114.707	127.276	98.232	127.6	112.396		126.17	118.912	142.115	106.228	134.662	123.751		124.732	126.307	159.92	114.976	113.714	108.818	137.247	128.66		136	131.281	166.375	122.757	113.163	123.457	147.18	138.032
	-2.0933	105.507	107.799	109.899	97.3425	120.706	105.147		114.274	115.97	127.883	98.3425	129.151	111.147		122.726	118.368	143.236	103.29	132.997	122.273		128.308	124.359	158.277	116.908	118.095	112.008	138.411	125.608		135.868	133.117	167.818	122.367	116.699	124.074	147.97	135.846
	-2.05007	106.877	107.445	112.936	96.063	120.362	105.87		114.329	114.677	128.254	96.3536	127.235	113.275		127.613	118.528	145.291	104.818	135.52	119.011		128.546	127.195	155.832	114.13	114.667	109.756	138.209	124.573		133.521	138.265	169.698	120.546	114.931	123.251	146.6	134.177
	-2.00683	106.437	106.706	111.333	95.9646	121.739	104.211		113.121	115.519	127.579	96.5746	127.783	110.176		122.726	119.84	141.368	103.878	133.956	121.916		128.635	126.341	157.074	114.01	114.667	107.88	137.854	126.436		134.05	134.233	166.2	120.156	117.878	122.84	147.022	138.262
	-1.96362	107.291	107.356	112.402	94.3898	118.941	104.466		113.149	116.481	129.568	97.0166	126.46	112.812		124.963	118.88	141.293	104.113	132.896	120.54		125.775	124.052	159.238	113.164	114.667	107.505	140.638	125.608		131.868	135.493	163.795	124.187	117.485	124.074	144.808	137.514
	-1.92038	105.558	108.744	110.883	97.0472	118.855	104.721		111.913	115.068	126.972	100	130.383	111.61		125.846	119.52	140.06	106.698	133.804	118.756		126.669	127.468	154.95	114.493	113.905	109.568	138.968	125.711		135.702	134.197	166.9	122.497	114.342	125.514	150.29	133.602
	-1.87715	106.722	108.951	108.746	97.9331	118.898	104.381		113.313	112.421	129.804	99.779	127.6	111.563		125.258	117.92	142.788	105.17	134.309	120.234		127.354	127.605	155.952	114.855	113.714	109.568	139.879	125.556		132.496	133.081	166.856	121.326	119.45	122.84	150.343	136.076
	-1.83392	106.205	107.001	111.361	95.4724	122.944	104.849		113.89	113.594	127.916	96.9061	127.144	110.87		124.374	118.08	140.919	104.348	132.795	118.705		124.613	127.058	156.232	114.614	114.857	107.692	139.119	127.315		131.736	135.205	164.101	122.367	116.11	122.222	146.389	135.27
	-1.79068	105.895	106.44	109.308	95.9646	119.372	103.956		112.435	114.226	126.433	98.453	129.699	109.528		124.934	119.04	141.181	105.875	135.52	120.285		128.01	129.279	154.188	115.821	113.714	107.88	138.563	122.763		133.256	132.217	168.212	123.017	119.646	124.28	148.603	135.386
	-1.74722	106.36	108.892	109.674	95.2756	117.434	104.466		112.545	114.226	126.028	98.1215	130.064	111.193		122.284	117.056	141.405	103.878	133.804	118.705		126.192	128.391	157.435	116.546	116.381	107.505	138.158	125.297		134.149	129.698	164.233	121.456	119.843	126.337	148.129	134.983
	-1.70402	107.704	108.124	110.124	96.2598	122.342	102.892		115.29	115.218	125.826	98.5635	127.144	110.546		122.078	116.896	139.686	103.525	135.015	118.603		125.447	125.828	155.471	113.889	116	110.882	138.209	125.142		133.289	132.757	165.107	122.237	116.306	124.486	146.284	136.133
	-1.66052	109.436	105.79	109.224	95.8661	117.004	105.487		113.67	111.639	125.657	98.895	125.821	110.685		122.461	116.512	140.994	109.401	129.162	118.96		126.49	126.238	155.711	113.043	115.81	109.006	138.563	123.59		130.876	132.541	164.495	120.676	116.896	124.074	145.915	136.018
	-1.61728	103.956	105.879	108.69	95.1772	118.08	104.168		113.478	112.571	125.354	99.6685	127.6	109.898		124.139	117.792	142.227	105.758	131.483	118.654		126.371	124.735	155.992	114.855	112.571	109.006	138.158	125.815		134.248	128.87	165.719	123.017	116.896	122.428	148.181	135.155
	-1.57407	105.895	106.292	111.024	93.5039	118.467	102.169		115.207	112.602	125.185	98.011	127.646	111.193		121.136	118.208	140.396	104.465	132.492	117.89		125.417	124.154	156.994	112.56	116	112.57	133.755	124.159		132.132	132.289	166.681	123.017	115.128	123.457	145.124	135.098
	-1.53083	106.412	106.233	110.658	95.9646	118.941	103.658		112.901	112.361	126.972	97.5691	126.505	109.436		123.668	115.904	140.284	105.758	130.928	118.502		125.864	122.788	154.95	113.647	111.048	109.944	139.777	122.918		132.959	130.13	165.107	121.326	115.324	119.959	149.71	134.983
	-1.4876	105.791	106.588	109.561	95.7677	116.616	104.509		112.38	110.256	126.163	98.453	122.901	111.101		124.433	116.608	140.845	105.288	130.676	121.356		127.116	124.94	152.385	114.855	111.238	107.88	135.121	125.453		130.38	129.05	164.014	122.367	112.377	120.165	147.601	134.695
	-1.44437	106.386	107.297	110.742	95.4724	117.52	104.424		113.396	112.842	127.546	98.232	124.088	111.517		122.078	114.528	142.862	102.468	130.676	119.521		126.251	125.077	155.391	114.976	111.81	109.944	137.551	125.918		129.917	135.025	165.982	124.577	114.735	120.782	146.178	134.062
	-1.40115	105.843	106.706	111.108	93.8976	116.186	103.02		112.847	112.992	125.421	99.337	125.684	112.165		120.283	116.032	140.957	105.523	132.442	116.616		128.129	125.658	154.389	116.304	112.762	106.379	137.955	124.832		136.926	134.593	163.008	124.057	114.931	122.222	144.597	132.911
	-1.35765	103.413	106.617	108.858	95.374	117.477	103.956		113.999	112.571	128.186	99.2265	124.361	111.563		120.43	116.704	141.442	103.76	129.465	118.705		126.49	125.145	157.475	115.217	112.381	112.195	135.881	124.625		129.322	131.102	164.757	122.107	114.538	122.222	146.705	134.868
	-1.31443	102.637	104.934	108.408	94.8819	114.636	103.233		113.039	112.15	125.32	99.2265	123.859	111.055		120.871	116.928	139.798	104.465	129.768	118.298		123.629	123.471	155.832	114.493	114.476	109.756	138.866	122.659		133.157	132.685	164.889	121.066	117.682	119.342	146.758	134.465
	-1.27093	102.689	105.968	107.79	93.3071	118.295	104.083		111.831	111.098	125.185	98.895	127.235	111.147		121.431	115.68	139.013	103.055	129.415	118.603		123.868	123.095	155.711	114.855	111.619	112.195	134.261	122.763		129.388	134.089	164.757	120.936	111.591	123.457	144.966	136.133
	-1.22772	104.369	105.849	108.943	93.9961	116.918	101.574		110.788	112.391	128.018	97.7901	124.681	108.141		120.018	115.328	141.368	103.995	127.8	118.858		124.017	124.052	154.469	113.406	114.095	108.443	136.994	123.332		128.76	131.246	165.151	123.147	113.36	120.782	145.335	137.514
	-1.18448	103.826	103.752	107.452	93.7008	117.908	102.467		111.886	111.158	127.175	97.6796	126.369	109.297		119.458	115.072	140.658	103.173	130.373	119.929		125.268	124.189	154.91	112.198	112.952	109.756	134.717	125.453		129.421	134.377	163.446	121.196	116.306	118.724	146.125	135.558
	-1.14098	104.809	105.377	106.834	93.4055	118.381	103.318		109.388	111.85	126.163	98.895	126.551	109.343		121.077	114.56	140.546	101.528	129.112	118.654		124.046	121.9	154.148	114.251	113.333	107.692	136.488	123.125		128.86	130.598	164.32	120.546	112.967	119.959	145.756	131.991
	0	100	100	100	100	100	100		100	100	100	100	100	100		100	100	100	100	100	100		100	100	100	100	100	100	100	100		100	100	100	100	100	100	100	100
	0.04335	103.852	101.684	98.7345	102.165	98.192	99.4896		100.302	100	98.3142	98.7845	98.0383	101.341		101.442	98.464	99.5142	97.5323	98.0323	100.408		99.3147	100.888	100.12	100.121	101.143	98.8743	99.8482	98.0859		100.43	99.928	99.5627	99.3498	97.446	99.177	99.8946	98.9068
	0.0865833	100.155	102.6	96.3723	104.626	98.7516	99.7448		99.0118	99.1278	98.584	98.232	98.5858	100.324		99.4112	98.848	97.1226	98.1199	98.1837	99.6432		97.6162	99.2142	99.519	97.4638	105.524	97.3734	99.747	98.4997		99.5372	101.8	99.6065	97.1391	93.1238	100	99.8419	97.4684
	0.1298	98.8108	102.659	97.1597	101.575	97.8907	99.0642		98.353	99.8195	95.8867	100.994	98.5858	101.156		96.6147	97.184	96.1136	96.5922	96.5187	100.51		94.6067	97.8818	97.6353	99.5169	99.619	96.06	98.1275	98.1376		96.4959	101.548	98.4696	96.8791	96.2672	97.9424	98.9457	96.3176
	0.173033	101.241	100.709	96.6254	102.559	97.5032	99.362		97.4472	98.9173	96.6959	99.558	97.9015	100.694		95.7021	97.28	97.4589	99.0599	96.5691	100.663		94.3087	96.6519	99.4389	96.256	98.8571	96.06	97.166	96.4304		95.1405	98.9921	98.9069	97.3992	94.3026	96.5021	97.2061	98.389
	0.216267	99.8707	102.659	96.1474	103.051	98.0198	100.51		97.557	99.3684	95.7856	98.453	97.5365	100.925		96.0259	97.792	96.2257	95.2996	97.5782	100.153		94.5471	97.9843	99.1182	95.5314	99.8095	93.2458	96.7105	95.1888		93.686	97.5882	97.9886	95.1886	94.1061	100.617	96.5208	96.4327
	0.2595	100.517	100.591	96.7942	103.839	95.8674	100.595		100.988	98.9774	95.381	97.5691	98.2664	100.185		96.6441	96.8	95.5531	91.8919	94.9041	98.4709		92.2825	96.7202	99.1984	95.4106	98.6667	94.5591	95.749	94.1542		92.8264	96.4003	97.289	96.2289	91.1591	99.177	95.572	96.3176
	0.302733	99.1468	102.806	95.8099	104.134	99.096	100.043		96.9805	98.3158	95.5496	98.1215	96.396	98.3811		94.819	96.768	97.1599	95.5347	95.2069	98.1142		94.1895	95.4561	97.515	96.0145	97.3333	93.4334	93.3704	97.3099		93.0248	97.1202	95.9335	94.9285	92.1415	96.2963	94.5177	95.5121
	0.34595	99.5346	103.604	95.36	103.248	97.8476	99.1068		98.6001	97.8045	96.2576	94.3646	97.5365	99.3987		94.6129	97.376	95.8894	93.4195	96.3673	97.9613		90.8224	96.2077	95.0701	93.8406	94.2857	91.9325	94.7368	92.1366		91.405	94.6004	96.7643	93.368	91.5521	93.4156	94.6758	93.9586
	0.389183	100.181	102.984	95.6412	101.378	98.8808	100.808		99.0393	96.6917	96.2239	96.4641	97.354	98.0574		96.703	95.84	93.8714	94.5946	93.6932	97.1967		93.3552	95.4903	94.8297	91.0628	96.7619	91.5572	94.0789	92.7056		91.8017	92.5126	96.808	92.4577	91.1591	93.2099	92.1982	94.5915
	0.4324	100.052	101.773	95.838	104.232	95.9966	100.638		97.7766	98.4361	94.437	96.1326	97.5365	96.8085		93.6414	96.16	94.5815	93.4195	96.2664	99.1335		91.5971	95.0803	95.3106	91.5459	94.2857	93.8086	93.3198	92.6539		92.5289	94.9244	93.0477	92.4577	90.5697	95.2675	94.9394	92.7503
	0.4759	99.819	102.097	95.36	102.067	98.7516	101.574		97.3648	96.8722	96.9993	94.9171	95.2099	97.2248		94.9956	95.68	93.1614	92.2444	94.0969	94.5973		90.9714	94.3628	94.5892	91.4251	94.8571	91.9325	95.2935	92.2918		90.1157	95.5724	94.4906	92.1977	90.7662	92.5926	93.2525	91.1968
	0.519133	100.905	99.7932	94.0664	104.921	101.119	98.5963		95.9374	96.7519	94.5044	95.0276	96.4416	96.531		94.083	94.912	94.2451	92.9495	94.9546	94.2406		91.1204	96.0369	94.2685	91.0628	95.4286	90.4315	92.1053	90.7915		89.8843	93.4125	92.9602	88.6866	86.2475	90.1235	91.4602	90.2762
	0.56235	100.181	102.304	96.3161	101.969	95.523	102.127		97.2001	94.6165	93.1895	93.7017	96.5785	95.5597		94.3185	92.992	92.2646	93.1845	92.886	94.9032		90.8224	93.4745	94.5491	90.7005	97.1429	89.3058	91.3968	91.5158		89.6198	95.3924	90.3804	88.6866	89.391	90.3292	91.7238	91.2543
	0.605583	101.758	100.709	95.0506	103.445	98.7086	100.468		94.5649	95.7594	93.7289	96.0221	97.3996	95.1896		92.199	94.656	91.704	94.4771	94.0464	94.2406		88.975	91.903	93.0661	89.2512	93.3333	90.0563	92.4595	89.8086		90.2479	91.9726	91.9983	90.3771	87.2299	91.9753	90.2478	89.7008
	0.648833	101.474	100.709	93.3071	103.445	98.4072	100.383		96.5139	96.391	92.4815	95.1381	96.1223	96.2535		91.9635	94.144	92.3767	92.7145	93.7941	93.8838		89.6305	92.8596	93.5471	90.2174	92.5714	88.9306	92.915	90.3777		90.5785	89.2369	92.6541	88.9467	87.6228	89.3004	89.2989	90.3913
	0.692067	101.525	99.7341	96.2598	103.051	95.6952	97.4054		95.4982	96.1203	93.4592	92.5967	95.073	95.0509		93.2588	92.576	91.3677	91.3043	92.7851	94.6993		90.2265	92.1421	91.4228	90.8213	93.1429	88.9306	91.5992	90.1707		88.0331	91.2167	90.7739	87.9064	84.6758	88.4774	92.0928	89.9885
	0.73555	96.6391	100.857	95.0225	101.575	96.7284	100.595		96.1021	95.4887	92.5152	94.5856	95.6204	94.4958		90.9332	93.376	90.4335	90.7168	91.3724	94.0367		88.7664	92.3471	91.7034	88.0435	91.4286	87.6173	92.8138	89.4982		90.314	89.8488	91.7796	89.987	84.8723	88.8889	89.8788	89.3556
	0.778767	97.363	100.148	94.5726	101.28	98.235	100.298		95.1963	94.3459	92.414	95.0276	94.0693	93.617		90.1384	93.664	91.4798	91.0693	92.4823	94.1896		85.3993	89.9214	90.982	88.285	89.1429	87.9925	90.0304	87.8945		86.5455	91.2887	89.7245	87.1261	85.2652	90.7407	89.0353	89.7008
	0.822	98.5005	98.582	94.1226	102.559	98.1489	101.659		93.9336	94.6767	92.2454	95.0276	92.9745	95.2359		90.6094	90.784	92.2646	90.5993	91.6751	94.5464		86.6508	91.3563	91.503	88.6473	92	87.8049	90.7389	89.1878		86.5455	91.3247	89.8557	84.9155	84.0864	88.0658	87.612	87.9747
	0.865233	96.9752	101.152	94.5163	100.886	96.2979	99.5746		93.0552	93.7444	92.9872	93.5912	94.0693	94.6809		89.5202	93.44	91.5172	90.4818	90.7164	93.4251		87.6043	88.9648	91.4629	88.0435	91.0476	87.6173	89.3219	92.5504		86.314	87.113	89.6371	86.736	83.1041	86.214	88.8245	90.5639
	0.908467	98.3971	99.3796	92.9696	100.689	96.2979	97.9583		92.3415	93.8346	91.1666	95.9116	93.1569	95.0509		89.8145	91.872	92.5262	93.537	91.5742	92.4567		87.2467	89.7848	93.3467	88.1643	89.5238	86.4916	89.8279	90.4811		84.8926	86.4291	88.1941	87.7763	81.5324	87.8601	86.7686	87.8021
	0.951717	98.6556	99.0251	95.613	101.476	96.7714	99.9149		95.361	94.2256	92.7849	92.8177	94.7993	96.6698		89.579	92.64	90.994	89.7767	90.4642	92.3547		85.5781	88.8282	91.3026	88.0435	90.0952	83.8649	88.1073	88.6187		86.1818	88.013	88.369	86.8661	83.4971	85.5967	86.6104	88.1473
	0.995183	98.8625	100.532	94.685	99.5079	96.2118	97.9583		91.4356	94.6466	92.8186	92.8177	93.4307	96.0222		88.4604	90.528	92.4888	87.7791	90.5651	93.6799		83.4625	90.2631	90.7415	87.0773	88.1905	87.8049	88.5121	89.3947		85.5868	88.5169	88.5877	84.0052	82.9077	84.7737	86.9794	86.5362
	1.03847	96.6649	100.739	94.7413	100	96.6423	99.9149		92.4787	94.5263	90.6271	92.4862	94.0237	95.5597		89.844	91.52	90.3214	89.3067	89.8083	91.6412		86.2336	89.409	89.5792	86.715	92	88.5553	87.247	89.0326		84	88.3009	87.7132	85.5657	83.3006	83.1276	86.5577	87.8596
	1.0817	98.5781	100.118	93.7289	100.394	95.7383	99.6597		93.165	92	92.414	95.1381	92.8376	93.2007		90.05	90.976	88.7519	87.7791	89.7578	92.4057		85.1907	89.5456	89.2986	87.3188	86.6667	87.8049	87.5	87.5323		83.438	87.977	87.4071	84.2653	80.3536	84.1564	85.398	87.3418
	1.12493	96.1996	99.2024	94.6007	102.165	96.384	98.0434		92.3689	93.9549	90.3237	93.4807	92.6551	94.3571		87.3123	91.648	92.8251	88.2491	89.4551	90.2141		84.8629	88.8965	88.3367	83.9372	87.2381	84.803	87.8543	88.3083		82.4463	88.4809	87.2322	84.3953	81.9253	83.9506	84.0274	87.5144
	1.16842	98.3454	99.616	91.676	104.724	96.7714	99.5321		90.667	93.3233	90.7957	91.9337	92.6551	95.3747		87.0768	90.464	88.6398	89.8942	91.221	91.1315		83.3731	88.1107	88.1764	88.285	88	85.1782	87.4494	88.1531		82.7438	86.1411	87.8006	84.7854	81.7289	86.214	84.66	86.0759
	1.21165	97.8025	101.329	92.1541	99.8031	96.9436	99.7023		92.4238	95.1579	90.526	92.0442	92.7007	94.6346		86.4292	89.088	89.574	88.3666	88.0928	90.6218		83.3135	88.0082	89.2184	83.4541	89.7143	85.5535	86.9939	86.9633		80.7934	84.9532	85.9641	83.0949	78.5855	84.3621	85.2399	84.58
	1.25488	97.0269	100.414	92.7165	100.591	95.2647	99.9575		91.2709	93.5038	91.6723	92.1547	92.0164	94.6346		88.1955	89.76	88.9013	87.7791	88.6478	91.6412		85.6973	87.4274	88.1764	84.1787	86.6667	85.5535	87.9555	87.4289		80.5289	86.6451	87.8443	84.3953	81.336	83.5391	84.4491	85.3855
	1.2981	95.8118	100.177	92.2947	103.74	96.5131	99.1068		91.6003	92.9624	90.3574	91.8232	92.2901	94.3571		87.5184	90.816	88.9761	87.074	88.1937	91.1825		82.8963	88.6232	89.4589	84.9034	87.8095	82.9268	86.5891	85.3595		81.1901	85.9251	84.9585	84.3953	79.3713	84.7737	83.5003	84.2923
	1.34133	96.8459	99.5864	92.3228	101.673	95.6522	96.4271		90.6945	91.5489	89.7168	93.1492	92.5182	95.0509		86.8708	89.952	89.8729	86.0165	87.6892	90.265		84.267	86.6758	88.2966	85.8696	87.619	83.8649	86.4879	85.3078		82.5455	86.3211	85.5269	81.2744	78.9784	85.5967	86.7159	86.1335
	1.38457	97.9059	100.886	92.7728	102.067	97.288	97.533		92.0944	92.2707	90.9305	90.2762	92.5639	93.5708		88.6959	89.92	91.8535	86.9565	89.2533	90.367		83.1943	87.7007	87.0942	83.2126	85.1429	85.1782	86.9939	85.6699		82.0496	85.9251	85.7892	82.5748	78.389	83.9506	83.9747	86.0759
	1.42803	96.0703	99.8523	93.0821	104.035	100.043	97.4904		91.9846	92.1805	89.7168	93.1492	92.6095	93.4783		88.1366	88.928	90.0224	86.9565	89.6065	91.5392		82.1812	87.1882	86.2926	85.8696	88.5714	83.6773	86.1842	85.1009		80.7934	84.8092	86.139	82.7048	80.7466	82.3045	84.291	84.0046
	1.47128	96.1737	100.857	92.4634	100.394	95.8674	95.7465		93.7689	92.782	90.5597	88.5083	92.3814	93.987		87.224	89.952	88.9387	86.9565	87.4874	91.7431		82.0918	87.3932	88.016	84.1787	86.6667	84.6154	85.7794	87.3254		79.438	86.1771	85.9641	80.4941	76.0314	82.5103	82.4987	83.0265
	1.51452	95.9411	98.1684	93.3633	102.264	95.48	99.3194		92.1768	93.5338	90.0202	90.9392	92.8376	92.3219		88.5782	89.728	87.8176	85.3114	89.1524	89.6534		81.0489	86.3683	87.0541	83.8164	87.8095	83.4897	86.0324	84.7387		78.7438	84.6652	85.0022	79.3238	78.7819	81.2757	83.6584	82.8539
	1.55775	98.2161	101.418	92.5759	100.984	96.8575	98.171		94.51	94.3158	88.267	91.4917	92.9288	93.7095		85.8404	89.952	87.855	86.4865	88.5469	89.9083		82.0024	86.4025	86.4529	81.7633	87.4286	84.2402	85.7794	85.6699		77.9835	82.2894	84.7398	80.104	78.389	83.3333	81.4444	82.7963
	1.60123	95.424	100.561	91.6479	101.673	96.2979	97.1927		91.6278	92.4812	90.526	90.3867	91.9708	93.7558		88.2249	90.464	88.154	85.0764	87.1847	90.4179		82.6877	84.5917	87.2545	83.9372	86.8571	82.7392	85.1721	86.0321		79.3388	81.7855	86.2265	80.4941	77.0138	85.3909	83.7111	84.8677
	1.64445	98.6039	100.207	92.5197	101.28	95.9966	96.7248		93.0003	92.9023	88.7053	90.8287	93.6588	92.5069		87.3123	89.408	86.6966	84.4888	87.2351	90.0612		82.1514	86.6758	87.8156	82.6087	84.7619	80.3002	85.0202	84.3766		78.6777	84.9532	85.7892	81.2744	77.6031	80.0412	83.5003	82.1059
	1.68768	95.8118	101.064	91.3948	100.787	96.4701	95.2361		90.2553	92.2707	90.8631	88.1768	92.1989	92.877		86.4586	88.896	86.6592	84.2538	89.001	88.634		81.1383	86.4025	85.4509	81.8841	84.9524	82.9268	86.1842	85.0491		79.6033	83.7653	84.084	80.2341	77.0138	82.0988	83.0258	82.7388
	1.73092	95.3723	100.03	91.9291	102.362	97.9768	97.9583		92.5062	91.188	90.1551	89.8343	92.1077	92.3682		88.2543	88.48	88.7145	86.134	90.3128	87.9715		80.7211	86.8808	85.491	80.4348	86.0952	81.8011	86.6397	84.0145		79.9669	84.0533	84.5212	81.2744	78.1925	82.716	82.2351	81.9333
	1.77415	97.0527	102.836	91.7042	100.394	95.1356	96.8099		91.3533	92	88.031	87.6243	92.6551	91.4894		85.4578	88.448	87.145	85.4289	87.336	90.265		81.5256	86.0266	85.491	80.314	85.3333	82.364	85.4251	83.5489		78.6446	83.5853	82.0726	79.7139	76.2279	80.8642	83.7638	83.084
	1.81737	96.2254	102.57	92.2947	103.051	95.48	96.342		92.3964	92.3008	89.9528	89.6133	91.6971	92.4144		86.0465	88.544	87.4066	85.4289	85.5701	89.6024		80.6615	85.2067	84.4489	79.5894	81.9048	81.2383	86.2348	84.0662		76.4959	82.3614	81.7665	80.3641	75.835	80.6584	82.9204	82.0483
	1.8606	96.8459	101.477	92.0697	103.346	95.8244	96.342		91.9297	94.4361	88.3007	89.1713	90.2828	91.1193		85.1339	88.8	87.3318	87.4266	86.6297	89.8063		79.9166	85.3775	84.8096	81.0386	84.381	81.2383	86.083	83.0833		78.1157	82.5414	83.2969	78.4135	76.2279	80.4527	83.2894	80.9551
	1.90383	94.4416	99.616	90.4949	100.984	96.8145	97.4904		88.6357	90.9774	91.234	89.7238	91.4234	92.0907		86.5175	88.352	86.6966	85.3114	86.9324	89.7044		80.006	86.1291	85.01	81.1594	82.6667	81.0507	84.919	84.1697		76.8595	82.0374	82.3787	80.104	79.5678	78.6008	81.9188	81.473
	1.94707	94.9845	99.9705	92.0979	99.0157	98.1489	95.5764		89.9808	92.4812	87.8962	88.3978	92.7464	90.8881		86.0759	89.12	87.3692	84.9589	86.3774	91.0296		81.3468	84.7967	84.3687	80.0725	84.9524	76.5478	85.7794	83.2902		76.9917	83.2613	82.8596	79.844	74.6562	81.4815	81.9188	81.5305
	1.99028	95.4757	100.502	90.8324	101.772	95.3508	96.4271		90.1455	89.8346	89.7168	89.2818	90.2828	90.6105		86.4292	89.024	88.154	84.2538	88.446	88.1753		81.1979	83.3276	84.6092	79.5894	83.619	80.3002	83.7045	84.0145		78.1488	81.7135	80.2361	79.7139	76.8173	79.4239	80.2847	82.9114
	2.03352	96.0962	98.6115	89.9044	101.87	94.0164	95.4913		90.5023	91.5489	90.2562	88.2873	91.6971	91.9056		86.1348	89.088	86.136	84.9589	85.6206	86.9011		80.7509	84.6601	83.8477	80.4348	85.1429	79.7373	83.0466	83.135		77.9174	83.0454	82.1163	78.6736	75.442	78.1893	81.5498	81.7031
	2.07675	94.545	100.709	90.1012	100.787	95.523	98.4687		91.8199	92.5113	88.3682	90.6077	90.9215	92.2294		84.8984	88.576	84.2302	84.6063	89.001	87.2069		80.0954	85.3434	83.8076	77.4155	82.8571	79.3621	82.6923	82.6694		78.6116	82.7934	81.373	77.8934	76.0314	80.4527	80.4428	81.9908
	2.12022	96.4064	98.1684	90.5231	103.346	94.8343	97.6606		90.8043	91.6692	89.7505	87.5138	90.0547	90.3793		88.1366	88.256	85.6129	83.6663	86.3269	88.4811		80.4231	83.0543	84.8096	77.657	81.7143	78.9869	83.0972	82.8246		77.124	82.1454	79.7551	78.1534	73.0845	80.4527	82.446	81.7606
	2.16347	97.7766	99.616	92.6884	101.378	95.7813	96.6823		88.2789	91.218	89.4471	89.6133	91.0128	90.7031		84.0153	88.32	85.0523	83.0787	85.2674	88.5321		80.3039	84.1134	83.487	79.7101	85.1429	79.3621	82.2874	84.0662		77.8512	78.9057	78.9681	76.8531	71.9057	77.7778	81.2335	81.1277
	2.20668	96.2513	98.9069	89.6794	100.886	94.7912	97.0225		89.2945	90.2256	87.795	90.0552	90.8303	92.0907		85.34	86.976	85.8744	82.8437	86.5792	87.9205		82.2408	84.3526	83.4068	78.0193	82.2857	78.2364	83.9069	82.4625		77.7851	82.8294	81.2418	77.6333	75.2456	80.4527	79.2831	81.2428
	2.25018	97.5698	99.9409	89.0607	101.378	95.0926	93.9175		89.5965	89.8647	87.2218	87.0718	90.4197	91.3506		83.4854	88.448	84.9402	84.4888	85.9233	86.4424		81.764	85.1725	83.0461	78.2609	83.4286	78.6116	82.7429	83.5489		78.2479	81.4255	81.3293	75.4226	74.0668	78.8066	80.8645	79.6893
	2.29342	95.1138	98.8774	90.2137	102.756	96.8145	96.2144		90.118	89.985	87.3904	88.8398	89.4161	90.2405		85.0162	86.944	84.9402	82.6087	84.9647	86.9011		79.41	83.8743	85.0902	78.2609	80.5714	78.2364	82.5911	80.8588		76.2975	80.8855	80.0612	77.5033	75.835	80.0412	79.8629	79.6318
	2.33663	95.7859	99.5864	88.5827	101.181	97.288	96.2994		92.3689	89.594	87.6264	89.5028	92.2445	90.8881		83.4854	87.008	85.9865	83.9013	87.1847	87.2579		79.857	84.0451	84.6894	78.6232	83.0476	78.9869	82.2368	82.1004		76.9917	81.2095	79.2742	74.1222	74.0668	74.6914	79.8102	81.8757
	2.37987	95.9411	100.591	88.7233	100.492	94.3177	96.4696		88.471	89.8947	88.8739	90.0552	91.469	90.333		85.3694	86.56	85.0149	81.6686	86.1756	86.7482		79.9762	83.3618	84.2886	78.5024	81.5238	78.424	82.0344	82.3073		75.8678	82.0374	81.1544	76.2029	73.2809	77.1605	79.1776	79.0564
	2.42308	95.9152	99.2024	89.2576	101.476	96.6853	94.598		87.3181	89.594	88.1659	87.7348	91.0128	90.7031		83.0144	89.088	85.2018	83.1962	86.8819	85.7288		80.6615	81.0044	82.6453	78.8647	82.8571	77.2983	83.4514	82.359		74.281	82.0374	79.7114	76.723	73.6739	76.1317	80.1792	80.3222
	2.4665	97.7249	99.8227	90.8043	99.8031	97.9768	98.0009		90.42	89.7444	87.4916	88.5083	90.5109	89.963		83.3088	85.984	85.0523	82.6087	85.671	86.1366		80.0656	83.9084	83.5671	75.9662	81.1429	78.7992	82.085	82.1004		74.5455	78.1138	80.6296	75.6827	72.2986	77.1605	80.6009	80.4373
	2.50972	95.3981	98.0207	89.9044	100.295	96.3409	97.3203		89.5416	89.3233	87.5927	87.9558	90.6478	89.3154		82.4845	85.024	84.2676	81.9036	85.9233	88.9399		78.7247	81.3119	81.483	75.9662	80.5714	78.9869	83.8057	81.1692		77.2893	77.2498	80.4985	75.8127	75.2456	75.9259	80.5482	79.6893
	2.55295	97.2854	99.5273	89.9606	99.0157	97.4602	95.8316		89.2396	89.594	87.7276	86.7403	89.9179	91.3969		83.6032	86.432	83.9686	81.1986	85.5701	88.3282		78.3373	83.5326	83.1263	76.3285	80.7619	79.925	81.9332	81.9969		75.438	80.8135	79.4928	73.472	73.2809	74.6914	78.8614	79.2865
	2.59618	95.8635	98.4047	91.1417	101.575	95.6522	95.4913		87.2358	90.4361	87.0533	88.5083	91.6971	87.8353		85.4578	86.816	83.3707	81.1986	84.9142	86.9521		79.3206	81.8927	83.2866	77.0531	81.1429	78.2364	82.0344	80.5484		74.9091	80.4896	81.0669	75.1625	72.6916	78.3951	77.8598	80.1496
	2.6394	96.0962	100.236	90.2418	101.476	95.6091	96.4271		88.7181	91.7895	87.1207	87.5138	89.9179	90.7956		83.1911	86.944	83.0344	83.3137	85.2674	85.423		79.6782	81.0044	80.4008	78.5024	79.619	77.1107	81.7308	82.2038		75.8678	78.7257	77.9624	74.2523	71.1198	73.8683	78.4396	79.4591
	2.6829	94.2089	98.1979	89.9044	100	96.9006	97.1076		87.2632	89.5639	85.9744	88.7293	90.4197	89.8242		84.398	85.728	84.6786	81.7861	83.9556	89.7044		77.9201	80.082	82.8858	79.1063	80.1905	77.4859	82.4393	80.8588		74.3471	77.3938	80.3236	75.9428	72.6916	76.9547	78.9141	79.229
	2.72613	94.9069	99.1728	88.8358	101.772	95.1786	96.4271		87.7573	90.4962	87.8962	87.9558	90.4653	89.4542		82.1902	86.592	84.1928	81.0811	85.217	85.525		78.4863	82.5077	81.4429	76.9324	79.619	76.7355	82.6923	83.1868		75.9669	79.4096	78.1373	74.1222	71.1198	75.1029	80.0211	79.3441
	2.76937	95.4757	98.0502	89.9325	100.098	95.8244	96.342		88.4161	89.4436	87.1544	87.1823	91.0128	90.4255		82.7495	85.888	83.9312	82.3737	85.3179	86.1876		79.2908	81.0044	80.7214	75.1208	79.2381	76.9231	80.8198	81.3761		73.4215	75.9899	78.2685	74.3823	70.334	75.9259	78.8086	76.5823
	2.81258	94.4674	98.4638	88.8358	102.461	97.4171	96.8949		89.2122	88.3008	86.2778	86.4088	88.5493	90.0555		85.3989	84.96	83.7444	79.2009	84.0061	86.1366		76.8772	80.492	82.1643	77.5362	78.4762	77.8612	81.5789	81.3761		74.2479	79.3737	78.8369	74.1222	72.4951	76.749	78.9668	77.0426
	2.85582	96.0445	99.0547	89.8763	100.098	94.6621	95.151		88.0867	88.6617	86.9858	86.9613	91.1496	89.0842		83.456	85.696	84.6413	80.0235	86.5792	85.5759		78.0691	79.5012	82.3647	75.1208	79.0476	76.9231	81.0223	80.4966		73.7851	77.6458	78.3997	74.3823	72.888	77.9835	77.0163	78.0207
	2.89905	94.8035	98.0502	89.1451	98.7205	94.2316	94.3854		88.3612	88.812	85.9407	86.4088	90.9215	89.8242		82.514	84.384	83.5949	80.376	84.0061	85.0663		77.0262	79.3987	81.483	75.6039	78.4762	77.8612	80.4656	80.9622		78.876	75.9539	77.6563	73.342	70.334	76.9547	79.3885	75.7768
	2.94253	93.4074	98.7001	90.045	101.575	98.0198	97.2778		87.2358	87.9699	86.615	87.1823	88.9599	88.8529		83.6326	85.536	83.8191	82.4912	83.8547	85.525		76.2515	79.6037	81.8036	76.6908	79.0476	75.0469	80.5668	81.8417		74.6116	75.378	77.9187	73.6021	69.3517	76.3374	78.1761	78.6536
	2.98578	95.9152	100.709	89.3701	101.378	94.8343	95.8316		88.8004	87.5789	85.8395	88.3978	89.4617	88.9917		82.8378	83.136	82.5112	81.4336	85.0656	86.1366		77.056	81.0386	79.1583	74.1546	80	76.9231	81.3259	80.9622		75.2397	76.7099	75.9948	73.6021	72.4951	75.3086	78.4396	78.1933
	3.029	94.4933	97.9321	89.82	101.28	95.8244	97.8307		88.2514	87.6391	85.8395	86.1878	89.0511	89.2229		84.3097	85.312	83.4828	81.7861	85.116	84.0469		76.6687	80.3895	81.002	73.7923	80.5714	75.6098	81.0729	79.8758		72.3306	77.8618	77.8312	72.4317	70.1375	76.1317	77.5962	76.4672
	3.07225	95.0879	96.9867	88.3577	99.5079	98.1059	96.7248		89.4318	87.6692	85.4349	85.9669	90.8759	88.6679		82.2785	83.392	80.9043	78.9659	84.1574	87.6147		75.3874	79.467	80.7214	74.0338	77.9048	76.7355	80.0607	80.238		75.5702	79.4096	76.6506	73.342	71.9057	74.0741	78.3342	78.7687
	3.11545	93.1748	98.1684	89.6794	100.492	94.0594	96.0868		87.2358	87.0075	85.8732	86.0773	88.2755	90.3793		83.4854	82.624	83.5202	78.3784	83.2492	86.8502		76.4899	77.7588	79.1984	75	77.9048	76.9231	79.9089	80.0828		73.9174	76.1339	76.1697	73.212	69.5481	73.6626	78.2288	79.977
	3.15868	94.6225	98.6411	88.8076	100.295	95.9535	96.0442		88.471	88.3609	86.1767	85.8564	87.9106	88.2054		82.5729	82.848	83.1465	79.5535	82.5933	84.5566		76.6985	78.9887	80.8016	73.5507	76.5714	76.7355	81.7308	80.7036		72.7603	77.1778	77.1753	71.1313	70.9234	74.0741	76.8582	77.4453
	3.2019	94.1055	97.223	88.9201	101.969	95.8674	95.1085		87.9495	87.7594	85.5698	86.6298	89.6898	87.9741		82.0135	83.712	80.3064	78.7309	83.7033	84.5056		75.5959	80.082	79.5591	74.2754	78.8571	77.2983	80.415	80.031		71.9339	79.7336	76.5632	73.6021	70.5305	73.6626	79.3885	78.0207
	3.24513	95.0103	98.3752	91.5073	100.984	96.6423	96.6823		86.028	87.2481	85.7721	86.8508	90.3741	87.6966		81.6897	83.52	83.1091	81.0811	82.6942	84.3017		75.8641	79.2279	80.7615	75.7246	76.7619	74.4841	80.2632	79.1516		71.6364	73.9381	76.0385	72.9519	71.1198	73.0453	77.1218	76.5823
	3.28837	94.2089	98.4047	89.1451	101.87	93.4998	95.0659		85.9182	88.4211	86.5138	85.7459	91.6971	90.2405		82.043	84.64	82.3244	80.141	82.7447	82.9256		75.5662	78.8179	80.6814	74.2754	77.1429	76.3602	79.2004	78.3238		73.8843	78.8337	76.7381	74.1222	68.3694	73.4568	76.9109	76.87
	3.3316	93.5884	98.3752	88.7795	101.772	94.2316	95.8741		89.322	87.0977	85.9407	86.2983	89.2792	86.5402		82.6612	82.784	81.8386	79.0834	83.0474	86.6463		77.205	77.7246	80.2405	73.3092	76.9524	75.6098	80.7692	79.2033		72.1983	79.3017	75.9948	73.0819	72.1022	72.2222	78.4924	75.3165
	3.37482	94.726	98.2275	88.3015	100.689	94.4899	95.1935		89.8984	87.9398	86.2778	87.7348	88.5036	89.2692		81.2776	82.304	81.9133	79.3184	84.9647	83.945		76.2813	79.467	80.4409	75.8454	77.1429	75.985	79.5547	78.7377		73.4545	77.4658	76.8693	71.5215	67.78	73.6626	76.5946	77.1001
	3.41832	93.7177	98.0798	89.2013	101.87	95.2217	94.2578		86.028	88.1203	85.9744	85.7459	89.7354	87.1415		82.4551	82.816	82.4365	78.0259	82.9465	84.6075		77.1454	77.383	80.0802	76.3285	75.0476	73.3583	79.8077	77.4444		72.8926	72.2822	75.7761	72.1717	69.5481	69.9588	75.7512	74.3959
	3.46153	92.9421	98.582	88.7514	99.2126	95.8244	94.4704		87.5103	87.6692	84.5246	87.0718	88.823	91.8131		82.3962	82.976	81.7265	78.1434	82.7447	83.7411		76.7282	78.5446	79.0782	74.5169	76.7619	76.9231	80.0607	78.7377		71.8017	73.3621	75.47	72.1717	68.1729	71.1934	75.8039	75.8918
	3.50477	94.3382	97.548	89.4826	99.8031	94.576	96.6823		89.2122	85.7744	84.2212	86.4088	88.6405	87.234		82.6023	81.856	80.9791	79.671	82.4924	84.3017		76.907	78.9887	78.7976	74.0338	76.9524	74.6717	78.9474	77.8065		74.0826	76.2779	74.8142	72.8218	69.7446	72.2222	75.5403	75.7768
	3.54825	96.7684	97.9616	89.0326	100.689	95.3508	96.8099		88.0593	86.797	83.7154	84.9724	89.0511	87.3728		80.5122	81.472	79.8954	78.8484	81.2815	84.2508		77.1156	76.8705	78.2365	74.6377	75.8095	75.7974	77.6822	79.4102		72.3967	74.0101	75.5575	71.9116	67.1906	73.251	75.962	75.374
	3.5915	94.1572	98.0207	86.811	100.492	96.6853	97.4904		87.6475	86.8872	86.0418	83.9779	89.2336	88.2054		81.8369	83.968	80.568	79.7885	82.5429	83.0785		76.5197	78.6812	80.3607	73.0676	76.1905	75.6098	78.3907	78.2721		74.6777	74.2261	74.8579	69.961	69.1552	70.9877	74.9605	75.4315
	3.63473	95.0879	98.966	87.1766	99.7047	94.4038	95.7465		86.9064	87.0677	85.7384	82.8729	90.0091	87.5578		81.8664	82.08	80.3064	77.6733	83.0474	83.1804		74.5232	77.998	80.1202	73.913	76.5714	75.4221	78.7449	77.8583		72.1983	75.126	75.0765	71.5215	67.78	70.9877	75.5403	75.7192
	3.67795	93.1489	98.257	88.1609	101.969	97.5463	96.5547		85.2869	86.1955	85.1652	82.6519	88.4124	89.2692		81.0715	82.336	79.858	78.6134	83.1483	85.1172		74.4636	77.1438	78.1563	72.343	76.5714	75.4221	78.6943	80.238		75.6364	74.0461	74.4206	69.7009	71.5128	72.2222	74.6442	75.3165
	3.72143	93.3557	98.2275	86.2205	100.197	96.384	95.7465		87.0711	86.0451	84.12	84.3094	88.1387	90.6568		79.9823	80.864	81.0164	78.7309	82.8456	83.2314		73.7485	76.973	78.5972	71.8599	73.9048	75.985	79.504	77.0305		71.9669	76.0979	75.9073	68.7906	67.387	71.1934	75.3295	74.5109
	3.76493	94.1313	97.6071	88.189	99.7047	94.3177	95.8316		88.5808	87.9699	85.8058	83.7569	89.5529	88.6216		79.9235	82.016	80.3812	78.1434	82.1393	83.4353		73.6591	76.4605	77.4749	72.2222	76.9524	73.3583	77.9858	78.5308		74.5455	76.0619	74.5955	69.961	66.9941	70.1646	74.7496	74.626
	3.8197	94.1055	96.9867	88.4702	100.197	95.9535	94.4279		85.6986	87.4887	85.0641	85.5249	89.1423	88.6679		80.365	83.968	80.2317	78.9659	81.3824	84.3017		73.7485	77.588	79.8397	75	76.381	72.6079	78.4413	76.8236		73.5868	75.45	74.8579	70.8713	70.334	69.3416	73.0627	73.5903
	3.88635	93.2782	98.8183	90.0731	102.756	94.1885	95.8316		87.1534	85.5338	85.0641	82.5414	89.0511	87.1878		80.7477	81.6	81.2033	77.3208	81.9374	82.4159		75.5066	77.8271	77.7956	72.2222	75.2381	73.1707	77.3279	77.91		71.1736	72.9662	73.721	69.0507	68.9587	72.6337	73.8535	74.0506
	3.95305	92.0372	97.4594	87.0922	100.787	94.8343	95.151		88.0867	85.7744	83.412	83.2044	88.3668	87.049		80.6594	82.048	80.0822	78.9659	82.4924	83.6391		74.6722	76.4947	77.3948	74.8792	75.619	74.6717	77.9352	78.5825		71.6694	75.018	74.683	70.8713	67.5835	70.9877	72.2193	74.626
	4.0197	94.8552	96.8981	87.8234	99.9016	97.331	95.2361		85.2869	87.0376	84.0526	82.3204	88.823	84.8751		81.4248	81.568	79.148	77.5558	82.2402	85.6779		75.2384	76.6655	77.8758	73.5507	77.5238	75.6098	79.5547	78.7894		71.0744	75.6659	74.4206	71.0013	66.7976	71.1934	73.2209	75.3165
	4.08638	95.2689	97.873	87.5703	99.2126	93.0693	93.7899		87.373	86.0451	83.2097	84.1989	88.3668	89.9167		82.3668	81.632	79.0359	77.9083	80.9284	83.3333		73.4803	76.4947	78.7575	72.4638	75.0476	74.4841	77.7834	76.9271		70.7769	72.6422	73.5461	69.7009	68.3694	72.8395	74.1697	75.9494
	4.15305	93.9504	96.6322	86.9516	100.492	94.1025	94.0876		85.726	86.5263	84.6258	84.4199	88.1387	87.1878		79.9823	81.088	79.2227	77.4383	80.9788	82.5688		75.2086	75.2989	78.3166	72.9469	74.2857	73.7336	76.5688	76.4615		72.4628	75.234	73.415	69.3108	68.7623	69.9588	72.9573	74.4534
	4.21972	93.1489	97.4003	88.5264	100.098	94.619	93.8749		86.6868	86.3759	84.9966	84.5304	88.3668	86.679		79.3053	81.216	80.6801	78.9659	79.9193	83.3333		73.8379	76.9047	77.8758	72.4638	75.4286	75.0469	77.4798	78.686		70.0496	73.3261	75.0765	71.7815	67.1906	72.0165	72.9573	74.3959
	4.28638	95.8893	96.514	88.5546	99.1142	93.8872	94.8107		86.028	85.3534	84.356	83.8674	87.5	87.3265		79.2758	80.736	79.6338	76.8508	81.0293	82.6707		75.7449	75.1623	78.477	72.7053	73.7143	74.2964	76.5182	77.6513		70.2479	71.8862	73.1526	68.9207	65.8153	69.3416	73.379	73.5328
	4.35305	92.7094	98.6411	87.7953	98.7205	92.5527	94.1727		86.1378	86.406	83.412	84.9724	87.1807	86.9103		80.159	81.824	80.6801	76.7333	79.7175	81.8552		73.4207	76.3922	77.8758	71.4976	74.6667	72.9831	76.9737	77.5479		69.9504	74.478	74.2895	69.4408	65.2259	69.9588	73.5372	74.7411
	4.4197	91.9597	98.8479	89.0889	98.3268	94.1025	94.6406		85.7809	86.1053	83.4794	83.3149	86.9069	86.494		80.0118	82.4	80.5306	77.9083	79.4652	82.5688		73.0632	75.9139	77.1142	71.9807	76	75.985	76.3158	77.91		70.2479	71.2383	72.8902	68.6606	67.78	70.9877	72.7992	73.878
	4.48638	93.2782	96.7799	88.5264	99.8031	93.0693	96.8524		86.5495	86.0451	83.2771	83.6464	86.542	89.1767		81.5131	80.864	79.1106	77.4383	80.1715	82.7727		72.4672	77.0072	75.6713	71.7391	75.0476	73.7336	76.3664	76.3063		70.3471	72.2462	73.5461	69.0507	67.387	73.4568	72.7464	73.5328
	4.55305	92.6836	96.5731	87.2328	98.5236	94.5329	94.4704		85.479	85.8045	84.0189	81.989	88.0474	87.0028		79.9235	80.448	78.5874	77.5558	80.9284	82.3649		73.6889	75.8114	78.6373	71.0145	75.2381	72.2326	75.7591	76.3063		69.5207	70.3384	73.1089	69.0507	65.0295	71.1934	71.7449	74.1657
	4.6197	93.0196	95.9232	88.4421	99.7047	94.3177	96.5972		84.3536	85.2331	83.4457	83.8674	86.2226	87.7891		80.6594	80.8	79.0359	77.9083	80.5247	81.6514		72.795	74.8206	77.4349	70.8937	76.5714	73.3583	76.0628	78.5308		69.6198	71.8143	74.1146	69.1808	67.9764	67.9012	72.7464	74.7986
	4.68638	92.6577	98.7297	89.82	98.9173	92.0792	93.4496		84.9849	86.9774	83.7492	83.5359	87.135	87.0028		78.1866	81.408	77.8774	75.6757	80.1211	82.314		73.9869	74.7865	76.7535	70.8937	74.4762	73.9212	77.4291	77.5479		68.6612	71.4543	71.9283	68.0104	67.9764	69.3416	72.641	73.3602
	4.75305	92.8645	96.9867	88.2733	100.984	95.5661	94.6831		86.1103	85.203	83.7829	83.9779	86.7245	88.2979		79.0698	80.448	79.7085	77.4383	79.667	81.5494		71.9905	75.8114	77.3948	70.8937	75.8095	70.9193	75.6073	78.2721		69.4545	72.1742	72.8028	68.4005	66.7976	69.7531	71.6921	72.9574
	4.81972	91.2099	97.4298	87.7109	97.7362	94.0164	93.4496		85.4516	85.6541	84.3223	83.2044	87.2263	89.2692		78.3044	80.096	80.8296	75.7932	79.4652	82.9766		72.2586	75.7089	77.4349	71.1353	75.4286	72.7955	74.4433	75.6855		68.9587	74.3701	72.6279	68.9207	66.2083	72.2222	72.1139	72.6122
	4.88637	92.7353	99.2614	86.9798	98.8189	94.4038	93.6623		86.2476	85.9248	83.6143	82.5414	86.177	86.6327		79.894	81.216	79.2975	76.8508	79.5661	82.0591		73.7187	76.973	76.4329	70.8937	75.4286	72.4203	75.7591	76.0476		69.7851	71.8862	72.934	67.7503	65.8153	68.93	71.9557	74.0506
	4.95305	91.9855	97.7548	89.1732	100.197	92.5958	95.2786		83.3654	85.7744	83.4457	82.9834	85.9033	87.049		76.8914	81.376	80.7549	76.8508	79.4652	80.9378		71.9607	75.1623	77.7555	72.1014	76.5714	69.7936	77.0749	74.4956		69.0248	70.3384	72.6716	68.7906	64.833	69.5473	71.7976	73.3026
	5.01973	92.787	98.5524	88.1327	100.591	91.9931	95.5338		82.8438	85.6842	84.3898	83.2044	86.6332	88.0204		77.5684	79.584	78.4753	76.3807	79.112	82.1611		71.1561	75.4356	76.9539	68.3575	74.0952	73.546	75.7085	75.3233		69.124	70.5904	72.7591	67.7503	65.8153	69.9588	73.1682	75.0863
	5.08638	91.3909	98.6115	87.4297	99.8031	94.4038	92.3011		83.832	85.8346	83.9514	82.8729	85.9489	87.4191		78.1572	79.328	78.9611	76.4982	80.6761	80.8869		70.7092	74.4448	75.9519	69.9275	73.3333	71.6698	75.6579	75.9959		67.6694	71.9222	72.6279	68.4005	65.4224	68.93	72.0084	73.7629
	5.15305	93.4592	97.4889	88.0202	101.083	94.7051	93.2795		83.2281	85.7143	83.8503	83.4254	85.7664	84.9676		78.1572	80.48	79.1854	75.7932	79.7175	81.8043		71.1561	73.2149	76.9138	70.6522	72.9524	71.8574	75.9615	76.0993		67.8347	72.1022	72.0157	69.0507	65.4224	68.7243	71.6394	72.5547
	5.21958	91.8563	97.4594	86.9235	100.492	94.4038	96.0017		83.5575	85.9248	84.592	81.547	86.0858	86.2165		77.9806	79.808	77.7653	74.7356	78.8597	80.5301		69.4875	75.0256	75.9118	70.0483	75.2381	70.9193	75.6579	77.8065		67.9008	70.3024	70.4854	69.3108	66.2083	66.6667	70.427	72.6697
	5.28625	92.8128	95.0369	86.8391	101.575	92.5958	93.322		81.9654	84.9023	83.8166	83.2044	85.7208	86.3552		77.3624	80.384	78.2138	78.1434	78.8597	82.212		70.9476	73.2832	77.9158	70.7729	74.8571	71.1069	74.5951	75.6855		68.2314	72.5702	71.5348	66.58	64.0472	67.9012	72.3247	74.3383
	5.35292	91.908	98.582	88.6389	101.772	92.8541	93.4496		83.6948	84.7519	83.0748	80.884	86.2682	85.8464		76.3026	79.84	78.6622	76.9683	78.557	82.4669		70.143	74.9231	76.8737	69.9275	74.2857	72.2326	74.5445	74.9612		68.7934	70.7343	71.4473	66.4499	65.8153	68.7243	71.7449	72.8423
	5.41957	92.3733	96.3368	86.7267	100	93.4137	94.8533		82.8438	85.4737	83.1086	82.2099	85.219	86.4015		76.8031	79.488	77.6906	77.5558	77.7497	85.2701		69.9046	73.5565	75.3106	70.2899	73.7143	71.1069	74.2409	75.8407		67.5702	72.6422	71.2287	68.1404	63.6542	68.93	71.165	71.9217
	5.48623	91.0807	96.8981	86.6704	99.4094	94.1455	93.3645		82.1576	84.6316	82.4343	81.2155	85.812	86.1702		79.3347	79.904	77.1674	74.3831	79.6165	80.8359		70.6198	75.0256	76.0321	69.8068	76.5714	69.9812	74.5445	77.7031		68.6942	69.4384	71.6659	70.091	63.0648	68.107	71.2704	72.0368
	5.5529	91.7787	97.1344	87.5141	99.311	92.0792	93.8324		85.6437	85.4737	83.0748	80.7735	86.7245	86.6327		75.8316	79.584	78.9985	73.913	77.4975	81.3456		71.0072	73.7957	75.5912	69.0821	72.5714	69.9812	74.0891	75.1164		67.7025	70.2304	70.8352	68.6606	64.0472	66.2551	71.903	71.4039
	5.61983	92.1406	96.514	87.964	99.311	92.1653	93.5772		82.6517	85.3233	82.6028	83.2044	84.3066	86.6327		77.1269	78.496	75.7848	75.0881	78.8597	81.2436		69.2193	73.5224	75.6713	70.7729	74.2857	70.5441	76.0121	75.1681		67.1074	72.1382	70.223	67.8804	65.6189	68.3128	71.6394	73.7054
	5.6865	90.4343	97.7253	86.6704	98.5236	93.1554	94.9383		82.6242	85.3835	81.9285	82.8729	85.6296	85.6152		77.7451	79.232	77.5785	75.9107	77.447	80.8869		69.9046	73.3857	76.7936	70.0483	72.5714	71.1069	74.2915	75.8924		67.3058	69.9064	71.2724	66.3199	65.2259	65.4321	71.6921	71.9217
	5.75317	92.5284	97.1344	86.0799	99.7047	94.1885	94.7682		82.6791	84.812	83.6817	82.9834	85.9945	86.494		76.4498	78.976	76.9058	75.0881	78.1029	80.3262		71.1263	72.8391	77.515	69.9275	72.1905	70.5441	74.2409	75.3751		68.9587	70.0864	72.4967	67.7503	64.4401	66.2551	70.6906	70.5984
	5.81983	92.2958	96.5731	86.1924	100.394	93.0263	95.3211		83.5575	84.1805	83.8503	80.3315	85.5839	86.5865		75.8905	79.84	77.728	76.8508	77.447	81.0398		71.3051	73.7957	76.2725	69.8068	72.5714	72.2326	75.0506	74.9095		66.9752	69.7624	72.1469	66.4499	64.2436	67.0782	71.4286	71.1162
	5.8865	92.0889	96.3959	86.4173	98.8189	95.3939	92.0459		84.0242	84.3609	82.232	83.2044	85.5839	85.6614		76.9797	77.92	76.8311	75.5582	76.8416	81.3456		69.1299	74.5132	75.9519	68.8406	72.7619	70.9193	74.0385	77.0823		66.9752	69.1145	72.3655	67.2302	64.4401	67.284	71.903	69.4476
	5.95317	89.8914	96.7799	88.4983	99.1142	94.4038	94.0451		84.6555	83.1579	83.2771	81.2155	85.9945	85.8464		75.8611	79.52	78.139	73.208	78.4057	81.2436		69.2491	72.8732	74.8697	70.4106	72.7619	71.1069	73.7854	75.0647		67.405	71.4903	70.7477	66.0598	64.0472	65.8436	69.9526	70.6559
	6.0196	91.2099	98.0207	87.0079	100.098	94.0164	95.704		80.5929	84.0902	82.8051	82.5414	86.8613	85.6614		75.9494	78.784	77.13	75.7932	77.9516	80.4281		69.1001	73.5224	75.1503	70.5314	73.7143	70.5441	74.747	74.1852		67.5041	70.9503	71.3161	68.1404	63.4578	66.2551	70.8487	70.5409
	6.08653	90.3568	95.3323	87.1766	101.575	91.907	93.4071		83.832	84.2707	83.2434	81.2155	85.2646	85.5689		76.7147	78.688	75.8221	75.6757	78.1029	81.6004		69.5173	73.2149	76.6333	71.9807	73.7143	69.7936	75.3036	76.3063		69.157	71.0943	70.2667	66.9701	62.8684	65.2263	69.9526	70.1381
	6.1532	92.425	97.6662	87.3172	99.8031	93.4998	92.6414		83.2556	83.7293	83.4457	81.8785	85.1277	85.2914		76.3321	79.136	76.42	75.0881	77.5984	79.8675		69.5471	73.9665	75.1904	69.2029	74.0952	71.6698	74.4939	74.6508		69.3884	70.9863	69.5234	66.1899	63.6542	65.8436	71.1123	71.4614
	6.2196	92.4767	98.582	87.2047	99.6063	94.9634	94.5555		82.6517	83.6692	83.0411	83.0939	85.3102	85.3839		76.4792	78.784	77.5411	75.2056	78.3047	78.5933		71.1561	73.4882	75.1904	69.9275	72.381	69.7936	74.1903	74.03		66.5785	72.2822	69.9169	68.5306	63.8507	66.6667	70.2161	71.3464
	6.28627	90.3051	96.8095	87.7672	99.6063	93.3706	92.9392		83.7222	83.7293	81.8611	80	86.1314	84.6438		76.2437	79.424	76.8311	74.5006	77.3461	79.4088		71.2753	72.9416	74.1082	70.7729	72	69.4184	74.2409	74.6508		66.843	70.7703	69.6546	67.3602	64.4401	64.1975	69.4781	70.8285
	6.35293	91.8563	95.6278	87.964	99.6063	94.4899	93.5347		84.134	84.7218	83.2771	81.2155	84.8084	84.4588		75.3606	78.88	77.5785	76.1457	78.0525	83.0785		68.7723	72.9757	75.4709	69.5652	74.2857	69.9812	73.583	73.9265		66.9421	72.2462	72.7153	66.1899	62.6719	66.8724	70.1634	70.7135
	6.4196	90.9514	96.8981	86.333	98.8189	93.8872	95.5338		83.6399	83.609	82.0971	80.884	84.3522	85.1989		76.4498	78.176	77.6532	75.3231	78.9102	80.683		69.5769	73.7274	73.9078	67.9952	73.1429	71.1069	74.4433	74.9612		67.0744	67.2066	69.6546	64.6294	62.8684	65.6379	69.689	69.9655
	6.48627	90.848	96.0118	87.4578	98.3268	94.3177	95.151		83.1183	83.2481	82.5691	80.663	86.6332	86.9103		76.1849	79.072	75.8221	73.208	77.6488	79.3068		68.5936	73.8299	76.1122	68.1159	70.8571	69.9812	72.9757	73.9783		66.5455	69.6904	69.3048	66.8401	63.4578	65.2263	69.3727	69.9079
	6.5532	91.4426	96.839	86.8673	98.2283	93.672	96.1293		82.6517	84.4211	81.4902	81.6575	84.3066	85.3377		75.6844	79.52	75.8595	73.0905	77.9516	79.3578		68.534	73.1124	74.3086	67.3913	72.381	68.8555	74.3927	73.3057		66.4793	71.0943	70.4854	66.71	64.4401	65.4321	70.6378	70.8285
	6.61987	92.1148	96.8095	86.1924	99.7047	92.0362	91.7907		81.5262	84.4511	80.5462	81.105	83.6679	86.4477		75.5078	78.432	76.8685	76.2632	77.6993	80.0204		70.3814	73.0099	74.8297	69.9275	72	69.4184	72.7733	72.7367		66.3471	69.2945	69.9606	67.1001	61.8861	66.0494	70.1634	70.9436
	6.68653	91.5977	98.5524	86.8954	98.0315	94.2746	91.493		80.538	83.9398	81.3554	82.5414	83.7135	85.5689		75.5078	77.696	77.6906	74.9706	77.8507	80.1733		68.6532	72.0191	75.3908	67.5121	69.9048	69.7936	74.3421	73.7713		68.0331	68.5745	69.4797	66.4499	62.8684	63.5802	68.5293	71.0012
	6.7532	91.6753	97.9616	86.4173	97.8346	93.672	93.8749		83.2007	84	81.6251	79.558	85.1277	85.3839		75.0074	78.72	76.9058	75.4407	77.2452	78.3894		67.938	71.5408	74.4689	68.2367	71.4286	69.0432	71.8623	73.4609		66.2149	69.7264	70.3105	65.7997	61.6896	66.8724	69.32	71.6916
	6.81987	90.4602	96.0414	88.3015	100.689	92.3805	92.8541		83.8869	83.8195	80.9508	79.8895	83.9872	86.0777		74.448	77.984	75.5232	75.9107	76.9929	79.4597		68.534	72.0875	74.1884	67.2705	71.4286	69.4184	73.836	75.582		67.2397	69.1865	70.0481	65.7997	62.0825	66.4609	69.8471	70.023
	6.88653	93.3299	96.3959	87.5422	98.7205	92.6819	91.5781		82.1576	83.2782	81.1194	81.326	85.1734	85.6614		74.8307	78.144	75.4111	75.4407	76.1857	79.103		69.1299	71.4042	74.0281	68.9614	71.8095	68.6679	73.0769	73.0988		66.843	70.4464	70.1355	65.6697	62.0825	64.8148	69.689	69.8504
	6.9532	89.7622	96.2777	85.7143	96.5551	92.0362	93.8749		83.8869	83.4887	81.8274	82.7624	84.854	85.1064		74.713	77.536	75.7474	75.6757	76.6902	80.683		67.4911	72.4291	74.1884	68.2367	72.7619	68.2927	73.7348	75.7372		64.595	70.0144	69.6108	66.1899	62.279	65.6379	68.6874	70.9436
	7.01987	90.6153	97.3117	86.3048	100.098	94.0164	93.9175		82.2125	84.1203	81.7937	80.884	84.0328	84.3201		75.0662	79.04	75.9342	74.1481	76.2866	78.1855		67.2229	72.0533	74.9499	69.2029	70.0952	68.6679	73.0769	73.3575		65.5537	68.4665	68.955	65.2796	60.5108	65.6379	67.844	69.6203
	7.08653	90.848	96.9572	88.3858	99.0157	94.0164	95.7465		82.487	82.6767	81.5577	79.8895	84.9453	85.3377		73.8298	77.344	77.6532	73.208	76.1857	78.8991		68.9511	71.6775	74.0681	68.2367	69.3333	70.9193	72.419	72.7367		66.843	70.7703	69.261	65.9298	62.279	62.963	68.7401	68.8147
	7.1532	91.7528	97.7253	86.6423	99.6063	94.1885	93.4071		81.087	83.2481	81.6925	80.442	85.4927	84.2276		73.8004	79.264	76.9806	75.6757	75.8325	79.6636		67.5805	71.4042	75.2305	67.9952	70.0952	67.5422	72.2672	73.4609		66.0826	68.3225	70.223	63.5891	62.8684	62.963	68.8455	69.1024
	7.21985	90.2275	95.6278	85.8268	97.6378	93.7581	93.1944		80.9772	84.2105	81.5914	80	84.8996	83.58		75.3017	79.104	76.1584	74.5006	75.6811	78.8481		67.4911	69.6618	72.3848	67.029	70.2857	66.7917	73.33	73.3575		66.4463	70.4464	68.9112	66.71	62.8684	63.786	67.7912	69.5627
	7.28653	91.1065	97.9025	87.739	98.622	93.2415	92.5138		82.8713	82.8571	80.5799	80.221	85.6296	85.0139		75.5078	77.856	77.1674	73.443	77.2452	80.5301		67.8486	71.1309	73.988	68.1159	71.8095	68.2927	73.33	73.1505		65.6198	70.3024	69.9169	64.3693	61.4931	65.2263	68.7928	69.9655
	7.35318	88.4953	97.0458	86.5861	99.7047	92.5097	93.0242		80.2361	83.0977	81.6588	80	85.2646	84.4126		73.5355	76.96	75.1495	76.0282	76.7407	78.3384		68.385	71.9166	74.8297	68.3575	71.2381	68.4803	73.2287	73.5127		66.0826	70.5904	69.2173	64.7594	60.5108	64.1975	68.1075	69.7929
	7.41987	89.9173	96.5436	85.9393	98.8189	93.4567	93.1519		81.6635	82.3459	81.996	79.337	84.6715	84.5513		75.2134	76.48	76.9058	72.738	76.2866	79.6636		69.4577	71.8483	73.4669	67.8744	70.4762	69.606	70.9008	72.8401		64.6942	70.0504	68.0805	65.6697	60.9037	62.963	66.8424	68.0092
	7.48653	89.969	96.13	86.9798	98.4252	92.7249	92.2586		80.4282	83.4286	80.3776	81.768	84.3978	84.2738		73.8004	77.376	75.4111	73.913	76.892	78.6442		68.3552	71.575	73.1864	67.7536	69.7143	69.0432	72.6721	73.4609		65.6198	68.1785	68.2991	66.9701	62.279	63.5802	69.0037	69.4476
	7.5532	88.8831	95.7459	88.189	97.5394	93.1554	92.3011		81.636	82.5564	80.9845	80.663	84.7172	84.5976		75.1251	78.176	75.3737	75.6757	75.5298	79.8675		67.4315	71.1992	74.4289	68.599	71.619	69.2308	71.9636	72.6332		66.1157	66.9186	68.1242	66.3199	60.3143	64.4033	70.1107	70.2532
	7.61985	89.0383	96.5731	87.8515	99.8031	92.811	93.96		82.2125	82.1053	82.6365	80.3315	83.896	84.9676		74.7424	78.272	75.4111	73.3255	75.6811	78.5423		68.4148	70.5842	73.507	67.1498	72	68.4803	72.6215	73.3575		65.3884	68.7545	69.3485	66.0598	59.332	61.7284	69.8471	68.9298
	7.68652	91.4426	95.2437	86.4736	99.1142	93.0693	92.2161		82.0203	82.4662	80.3102	82.0994	84.1241	85.2451		74.0065	78.24	74.9253	72.8555	75.9839	78.1346		65.4648	70.0717	74.4689	67.1498	70.4762	68.6679	71.5081	71.7538		64.8264	70.1944	67.7744	65.9298	60.1179	63.1687	68.0021	69.9079
	7.7532	89.3485	96.5436	86.9798	98.5236	94.8343	91.7907		81.6635	83.3383	82.0971	79.4475	83.6223	83.7188		73.771	76.736	75.9342	73.3255	76.337	76.7074		66.2992	70.2426	72.7856	67.6329	70.0952	69.4184	72.6721	73.1505		64.1983	68.5385	67.7744	64.2393	60.5108	64.1975	68.3184	69.5627
	7.81985	90.0207	96.7504	86.6423	101.476	93.0263	91.6631		81.8282	82.0752	81.2205	80.5525	84.3522	83.6263		72.9173	77.152	77.0553	74.0306	76.337	79.3578		66.7461	70.1401	72.3046	68.599	70.0952	68.8555	72.9757	73.7713		65.124	67.3866	67.1185	65.0195	60.5108	63.9918	67.7912	69.9655
	7.88652	90.4085	97.7253	87.6828	100.591	91.5196	93.3645		81.3615	82.9173	80.209	81.768	85.0821	83.8113		74.3892	76.544	75.7848	73.0905	76.2361	77.8797		66.8951	71.3017	72.6253	67.2705	70.6667	69.0432	71.6599	71.5986		64.562	66.6667	68.3428	64.7594	58.7426	62.3457	68.6874	70.2532
	7.95308	91.2616	96.5731	87.036	100.492	95.1786	92.5564		78.3969	82.2556	82.2657	79.6685	84.9909	84.3663		72.7112	76.928	75.299	74.7356	76.9929	78.7462		67.2527	70.2767	72.986	66.6667	71.2381	66.6041	70.9008	72.2193		66.281	68.6825	67.8181	63.5891	60.9037	63.5802	67.844	68.3544
	8.01975	88.5729	95.8641	85.3768	98.4252	93.9303	94.9383		81.1694	82.6466	79.6359	80.221	84.6259	82.6549		73.0645	76.896	75.1495	74.6181	75.4289	78.1346		65.7926	71.5408	73.3467	66.3043	69.1429	66.9794	72.419	72.5815		64.1983	67.6026	68.5614	64.8895	60.7073	62.7572	68.7401	69.5052
	8.08647	89.9173	96.3368	85.9111	98.4252	93.0263	92.5989		80.0439	82.015	81.5577	81.326	81.5693	83.4413		74.0359	76.896	75.4858	72.1504	75.8829	78.5423		67.3421	70.9259	73.5872	67.5121	70.2857	69.7936	73.1781	72.3745		64	67.8546	67.512	63.459	61.1002	64.4033	68.1075	68.9298
	8.15312	89.2192	97.1049	86.2767	98.3268	93.4998	93.8749		80.9223	84.3308	80.9845	80.442	83.7591	82.0999		75.4489	78.368	76.5321	74.5006	77.2957	78.7462		68.2062	71.1309	72.7054	65.7005	69.9048	67.7298	71.5081	72.7367		64.1653	68.2505	67.6432	64.3693	60.1179	64.1975	68.8455	68.0667
	8.2198	89.9948	96.5731	87.0079	98.7205	91.3474	92.0034		80.8125	82.015	79.973	79.0055	85.0365	83.58		73.2705	76.32	75.1495	75.2056	75.782	78.1346		66.18	69.4909	73.1864	67.7536	70.2857	66.9794	72.419	72.8919		63.7686	69.6184	68.5614	63.329	59.725	63.1687	67.5804	68.527
	8.28647	89.6846	96.6027	87.5703	100.295	93.672	91.3228		83.4203	81.8045	80.1079	80.1105	85.8577	83.4875		71.8575	76.608	75.8221	73.7955	75.9334	78.5423		66.4779	70.3109	73.7074	66.5459	68.5714	65.4784	71.913	71.6503		62.9752	68.8985	68.8675	65.1495	59.5285	62.963	66.2098	67.6064
	8.35312	88.9607	95.7459	86.7829	100.197	92.768	93.8324		80.4008	83.0075	79.8382	81.6575	82.8467	84.0426		73.7415	78.24	75.0747	71.3278	74.4702	77.8797		66.8653	70.5842	72.8657	65.5797	68.381	68.2927	71.2045	71.133		62.7769	69.1145	67.6432	64.6294	60.9037	60.6996	67.2641	70.1956
	8.41978	89.4519	95.7164	85.7705	101.673	93.2415	93.5347		81.2792	80.7519	79.737	80.7735	85.3558	84.0888		73.2705	76.704	73.6547	72.973	76.4379	78.0836		65.7032	69.286	72.6653	64.372	68.7619	68.1051	72.419	71.2364		64.4959	68.8625	69.0424	63.199	58.1532	61.5226	67.3168	66.6283
	8.48645	90.848	96.2186	87.036	97.6378	92.768	91.2378		80.3459	82.1353	81.1868	79.4475	83.6223	85.0139		74.448	76.576	74.6263	72.973	75.9334	77.7778		66.7461	69.6276	73.5872	66.7874	70.0952	65.8537	71.4575	71.8572		63.2397	69.3305	68.5177	62.6788	58.9391	62.963	68.0548	68.2394
	8.55313	91.0031	95.7164	86.5017	97.5394	91.6918	92.131		80.4557	80.9023	81.9622	81.768	83.3485	83.4875		75.2134	77.184	74.701	72.2679	76.9929	77.5739		66.6567	70.9942	73.8277	65.5797	69.7143	66.0413	72.1154	71.1847		64.0992	70.0864	67.7744	62.8088	58.7426	61.7284	65.7354	67.4914
	8.61978	90.2792	94.771	86.8954	97.9331	93.0693	93.5772		80.8949	81.9248	81.2542	79.779	84.2609	82.0537		73.1528	75.008	74.4395	73.5605	73.7639	77.1152		65.4052	70.2767	72.1443	66.9082	68.9524	66.7917	72.3178	71.4951		62.4793	68.0346	67.8181	66.3199	58.1532	63.3745	65.7881	66.3982
	8.68647	89.6587	95.6573	85.5456	99.1142	92.0362	92.9392		80.1263	83.1579	81.1194	79.558	83.4854	83.3025		73.0056	77.152	75.1121	72.0329	76.2361	78.3894		66.329	70.1059	72.3447	65.7005	69.1429	66.6041	68.9777	70.7708		62.281	68.2505	66.1128	63.5891	58.3497	61.1111	66.8951	68.3544
	8.75313	91.029	95.5687	86.6704	97.8346	92.4236	94.513		82.4595	81.7744	79.8382	79.0055	84.0785	83.9038		72.9762	76.288	73.9537	74.3831	76.4884	77.8287		65.9416	71.1992	72.3848	66.0628	69.1429	64.9156	72.1154	71.9607		64.2645	68.1066	68.2991	62.9389	59.332	60.9053	66.5261	68.1243
	8.8198	90.486	96.3072	86.3892	97.6378	93.2415	93.2369		79.4126	83.1579	82.0297	78.674	83.4854	83.1175		73.4766	76.192	76.4574	73.7955	75.782	76.1468		66.9249	69.286	73.5872	67.8744	69.5238	66.4165	70.8502	72.0641		64.1322	68.7185	68.3865	62.9389	57.5639	61.7284	67.0005	68.527
	8.88647	91.2875	97.0162	86.7267	98.1299	93.3706	94.2152		79.5498	83.0075	80.9845	79.0055	82.938	84.7826		73.7121	76.16	76.5695	71.5629	75.6811	78.0836		67.8188	69.4568	72.8257	65.3382	68.5714	66.2289	70.3947	72.4263		62.9752	66.6667	66.8124	65.1495	58.9391	62.7572	65.7881	67.7791
	8.95312	89.3485	95.1256	86.6423	99.9016	92.1223	90.9826		79.44	82.1353	80.1753	79.4475	83.3485	83.025		73.7121	76.992	74.0658	72.2679	75.3784	76.5545		66.0608	70.2084	72.6653	67.029	70.2857	65.8537	71.5587	70.6156		63.9008	68.0346	66.2003	65.6697	57.5639	62.3457	67.4222	65.6502
	9.0198	89.6329	95.0074	86.6704	99.5079	91.864	91.4504		80.1537	80.812	80.0405	80.221	84.3978	81.9611		72.5935	76.224	74.5142	70.2703	74.7225	75.79		65.435	70.2426	70.4609	65.2174	68.9524	66.2289	70.0405	71.9089		62.5455	66.1987	66.8999	62.9389	58.3497	61.7284	67.5804	67.7791
	9.08645	89.7104	96.2777	87.261	98.1299	92.6819	93.1093		81.0321	82.4962	81.0182	79.4475	83.7591	83.4875		73.977	77.152	74.4768	71.4454	75.2775	76.0958		65.7032	69.1835	71.7836	65.2174	69.9048	67.7298	71.6599	71.702		62.1818	68.1425	66.8561	64.3693	58.1532	61.7284	65.9462	68.8147
	9.15312	88.6763	95.9527	84.7019	96.9488	93.2845	90.4721		80.2635	82.3459	79.737	79.779	82.6642	84.8751		72.2696	75.264	74.4021	72.738	74.5207	77.5229		66.2694	70.0376	72.7455	66.3043	66.4762	67.167	70.496	71.4434		62.4132	67.4946	66.5501	63.8492	57.7603	62.963	67.0532	66.2831
	9.21978	90.2017	96.7208	85.2643	99.311	92.811	93.96		80.3733	82.3759	79.5347	77.1271	83.2117	83.025		73.3883	75.328	73.4679	72.738	74.8234	77.472		66.9547	69.9009	71.7836	66.0628	67.8095	68.6679	70.749	70.7191		62.4132	65.7307	65.8067	62.2887	60.7073	61.1111	64.9446	67.0311
	9.28645	91.9855	95.1551	85.0956	98.9173	94.3177	91.7482		80.3459	81.5338	80.9508	80.1105	83.9416	85.1526		73.1822	74.528	72.7952	69.6827	73.5621	76.8603		66.2694	68.8418	71.2625	65.5797	68.1905	66.4165	69.9899	71.4434		63.9008	66.7747	66.8124	63.0689	58.5462	60.4938	65.3664	66.0529
	9.35332	88.8573	94.8892	85.2362	99.5079	93.1124	94.513		79.5498	82.1654	79.8719	77.9006	82.573	81.6374		74.1831	75.008	74.0284	73.208	75.1261	75.79		65.4648	69.286	71.8236	65.942	67.4286	67.167	70.0911	71.4434		63.3058	65.5148	66.2877	62.4187	57.1709	61.7284	67.2641	65.5926
	9.41998	89.969	96.2186	86.7267	99.311	93.2845	91.7907		81.1419	83.4586	79.973	81.4365	82.3449	82.0999		71.3276	76.128	74.8132	71.9154	75.4289	76.0449		64.9285	69.3201	69.98	66.5459	68.9524	66.0413	69.3826	70.7708		61.7851	65.7307	65.8067	62.8088	58.9391	60.6996	66.3679	67.4914
	9.48663	89.1934	94.003	85.7987	98.622	92.4666	90.94		78.8636	82.015	78.9278	79.0055	82.0255	81.7761		72.7701	75.808	74.1031	72.738	73.8143	77.9307		64.6901	68.466	72.3447	67.1498	68.1905	65.2908	69.4838	70.8226		62.5124	67.0266	66.725	62.2887	59.1356	58.8477	65.7881	67.7791
	9.55332	91.2875	95.0665	83.9708	97.2441	95.9535	91.0251		79.9067	82.3459	78.5907	79.6685	82.8923	83.9963		71.7986	76.416	74.4021	72.5029	74.5711	76.2997		64.3623	68.8077	72.8657	65.8213	68.9524	67.3546	70.5972	71.7538		62.876	67.8186	66.3752	62.2887	59.1356	61.7284	65.3664	66.916
	11.2491	95.8118	89.3648	112.542	84.9409	118.467	104.636		26.6264	26.1053	17.9029	8.39779	21.7609	9.06568		41.7427	39.712	42.0404	16.6863	38.8496	24.0571		57.3004	47.5914	65.8517	30.314	33.1429	29.4559	50.7085	32.3849		52.2975	51.3319	74.2895	35.1105	35.9528	39.7119	58.6189	45.0518
	11.2924	94.8035	88.8922	115.017	86.9094	118.597	105.189		23.0854	23.3684	15.3405	8.1768	18.6131	7.86309		39.9176	36.576	39.1256	15.8637	35.4188	21.4577		54.8272	46.3956	65.6513	28.744	31.8095	26.0788	49.0891	30.0569		51.8678	51.4039	71.1412	34.2003	35.5599	38.2716	57.0901	43.3832
	11.3356	94.7001	90.0443	113.92	84.3504	119.716	102.254		21.6854	20.4211	13.7896	6.40884	15.8303	6.98427		38.2691	34.976	35.6502	14.8061	32.3915	19.8777		54.1716	45.5757	63.7675	27.657	30.4762	24.9531	45.0405	28.867		50.5124	47.9842	70.6165	31.9896	32.8094	36.214	54.1908	42.2325
	11.3788	97.3113	88.2422	112.711	85.2362	119.759	103.573		19.4894	17.6241	12.0701	6.29834	14.2792	6.24422		35.9729	32.96	33.8565	13.396	28.7588	17.8899		52.4434	44.8924	61.9238	26.2077	29.9048	24.9531	43.6741	27.6772		50.2479	47.9482	69.3922	31.0793	32.4165	34.9794	52.1349	40.3337
	11.4221	94.6484	90.7533	113.217	84.4488	118.511	104.509		17.7326	16.2707	11.1261	5.96685	12.3631	6.01295		34.9426	30.784	30.6801	12.691	27.5479	16.208		51.0429	42.945	59.9198	24.5169	28.381	22.7017	40.8401	26.0735		49.9174	48.1641	67.9493	29.1287	31.0413	33.9506	51.1334	39.8734
	11.4656	96.3289	90.1034	112.964	85.0394	120.577	105.232		16.1405	14.3759	9.91234	5.63536	11.3595	5.55042		33.559	28.832	29.2975	10.9283	24.5207	14.9337		49.8212	42.0225	57.6754	22.4638	27.2381	22.8893	39.6255	23.9524		48.9256	47.4802	66.5938	28.0884	31.0413	34.9794	51.0279	38.2624
	11.5088	92.8904	90.0739	113.751	84.5472	120.663	105.7		15.07	13.1429	9.10317	5.74586	10.3102	4.85661		32.0283	27.424	27.8027	11.0458	23.108	13.2518		47.199	40.7926	55.511	22.4638	25.5238	20.6379	38.3097	22.5556		47.3058	45.9323	65.8942	27.9584	30.0589	32.3045	48.3922	36.3636
	11.552	94.9328	90.0148	113.105	84.252	119.199	103.275		13.725	12.2105	8.39514	5.08287	9.39781	4.57909		30.262	25.824	25.4111	9.87074	21.2916	12.895		46.3051	39.4944	54.3487	21.256	24.9524	20.6379	36.5891	20.6932		47.0083	45.6084	63.8391	26.2679	29.4695	31.4815	45.9673	35.0978
	11.5953	95.424	90.3102	115.607	85.1378	119.759	103.318		12.9564	11.3083	7.95684	5.08287	8.62226	4.57909		29.1139	25.024	23.8416	9.40071	19.3744	11.315		45.59	39.0844	52.7054	20.1691	23.4286	19.137	34.2611	20.2276		46.4132	45.5724	61.9152	25.7477	29.0766	29.8354	45.0712	34.0621
	11.6387	97.8542	90.192	114.679	84.9409	116.358	104.636		11.9407	10.1353	7.2151	4.86188	8.07482	4.20907		27.8187	23.328	22.9821	8.81316	17.3058	10.8053		44.9046	37.0345	51.5431	19.3237	22.0952	18.9493	33.6032	19.2964		44.1983	43.3765	61.303	25.4876	27.5049	29.2181	44.8603	32.7963
	11.682	96.5357	89.9261	113.386	84.5472	118.554	104.211		11.3368	9.44361	6.67566	4.64088	7.39051	4.02405		26.229	22.304	20.9268	8.22562	16.5489	10.1427		44.0703	36.1804	48.1764	18.8406	21.5238	18.7617	32.7935	18.1066		44.8926	43.3045	58.286	24.1873	26.7191	27.572	43.806	32.336
	11.7252	95.1913	90.3988	111.783	83.4646	118.683	103.445		10.431	8.81203	6.16993	4.53039	6.97993	3.83904		26.1407	21.632	19.9178	7.9906	14.9849	8.76656		43.6234	36.4879	47.0942	18.4783	20.9524	17.2608	31.0223	17.3306		44.2975	40.8207	55.8811	23.1469	26.3261	28.1893	42.9626	31.7031
	11.7684	96.6132	91.0192	113.976	84.5472	117.908	104.594		9.93687	8	5.39447	4.30939	6.52372	3.60777		24.5511	19.84	18.6846	7.40306	14.5308	8.61366		41.6865	34.2672	45.6513	17.7536	20.1905	17.636	29.3016	16.9684		44.1322	40.7487	54.1758	23.277	25.7367	26.1317	40.9594	31.3579
	11.8117	95.6567	90.2511	111.502	83.4646	114.808	104.424		9.05847	7.69925	5.15846	3.8674	6.15876	3.42276		24.0801	18.976	17.7504	6.93302	13.7235	7.84913		40.9118	33.6522	44.0882	17.7536	20.9524	16.5103	28.8462	16.3476		42.843	40.7127	53.4762	23.0169	24.558	26.749	40.9594	30.2071
	11.8549	95.6825	90.4284	111.614	83.7598	116.272	105.402		8.70162	7.15789	4.82131	4.1989	5.93066	3.3765		23.6385	18.624	16.4051	7.05053	12.3613	6.98267		39.9881	33.5839	41.523	16.0628	19.8095	15.3846	27.6316	15.3647		42.3471	39.8848	51.5523	21.8466	24.3615	25.9259	39.4307	30.1496
	11.8984	94.8294	89.5126	112.627	82.4803	118.08	103.871		8.42712	6.79699	4.48415	4.0884	5.47445	3.14524		22.3727	17.536	15.8445	6.46298	11.7053	7.18654		39.2431	31.9781	41.2425	16.6667	18.8571	15.197	26.3664	14.1231		41.4215	38.8769	49.847	21.5865	23.3792	25.5144	38.4291	29.8619
	11.9416	95.5791	90.4579	112.008	83.563	117.047	104.041		7.93302	6.13534	4.5853	4.0884	5.24635	3.284		20.9302	16.992	14.9477	5.87544	10.999	6.52396		37.2169	31.6023	39.2385	14.6135	18.6667	15.197	25.4555	13.9679		41.3554	38.8409	48.6664	20.4161	23.3792	24.6914	38.5345	27.618
	11.9851	93.6918	89.0694	113.414	83.3661	116.961	104.126		7.49382	5.92481	4.24815	4.30939	4.88139	3.05273		20.2826	15.872	14.2377	5.52291	10.6458	6.06524		36.9785	30.9874	38.7174	14.8551	17.1429	14.8218	24.5951	13.2437		40.7934	38.7689	47.7919	20.4161	22.7898	23.4568	37.3748	28.1933
	12.0283	93.7952	89.2171	111.67	82.5787	114.55	103.956		6.99973	5.56391	3.84356	3.75691	4.69891	3.00648		19.9882	15.008	13.5277	5.05288	10.0404	5.86137		36.919	29.8599	37.7956	14.1304	16.9524	14.0713	23.836	12.4677		38.9752	35.9251	47.8356	19.6359	22.3969	23.4568	36.8477	26.985
	12.0715	92.4767	88.8331	111.614	81.6929	115.239	106.083		6.75268	5.08271	3.54012	3.53591	4.42518	2.96022		19.5761	15.008	12.7055	5.40541	9.43491	5.50459		35.5781	29.0058	37.3948	13.6473	16.9524	13.6961	23.9372	12.209		41.8182	35.4212	46.8736	19.3758	22.2004	22.6337	35.1608	26.0644
	12.1149	95.6825	88.5672	110.546	83.6614	117.305	103.318		6.34093	5.05263	3.50641	3.64641	4.42518	2.91397		18.7518	14.112	12.7055	4.81786	8.77901	5.50459		34.8331	28.3567	36.7134	14.372	16.381	12.9456	22.0142	11.6917		38.5124	36.2131	45.1246	19.6359	21.2181	21.1934	35.6879	25.4315
	12.1582	97.6991	90.4874	112.992	81.8898	115.239	105.742		6.39583	4.66165	3.43898	3.42541	4.42518	2.82146		17.8981	13.6	12.0703	4.70035	8.37538	4.9949		34.3266	28.2542	36.0721	13.285	16.1905	12.758	21.6599	11.2261		38.1818	34.5932	44.8623	19.2458	21.611	22.0165	34.3173	25.4891
	12.2014	95.7342	88.5968	112.317	81.5945	115.153	103.318		5.84683	4.42105	3.03439	3.53591	4.2427	2.82146		17.8981	13.088	11.6592	4.58284	7.82038	4.9949		33.1347	27.7417	35.4709	12.9227	15.0476	11.4447	21.0526	10.7605		38.6777	35.4932	43.8566	19.1157	19.8428	22.2222	34.2646	24.7986
	12.2446	92.5284	88.065	112.739	81.9882	115.067	103.615		5.68213	4.21053	3.2704	3.42541	4.10584	2.91397		16.4557	12.512	10.8744	4.46533	7.66902	4.33231		32.7771	27.6734	33.7876	12.3188	15.0476	12.0075	20.5466	10.657		37.157	35.0972	42.676	18.2055	20.2358	20.9877	33.4212	24.6835
	12.2879	93.8211	88.3309	111.502	82.5787	116.315	103.786		5.35273	4.15038	3.13554	3.64641	4.0146	2.82146		16.0141	12.256	10.4634	4.46533	7.21493	4.38328		32.0024	26.6484	34.1082	12.1981	14.4762	12.0075	19.7874	9.72581		36.3967	33.0814	43.5068	18.3355	20.4322	21.3992	33.3685	24.2808
	12.3311	93.3557	88.8922	112.261	82.185	115.928	103.743		5.24293	3.93985	3.03439	3.64641	3.87774	2.63645		15.7786	11.84	9.86547	4.11281	6.91221	4.38328		31.6746	26.0335	32.6253	11.715	14.6667	11.4447	19.5344	9.77755		36.0992	33.3333	41.2331	18.2055	19.2534	20.5761	32.3142	23.3602
	12.3743	94.0796	88.4786	112.542	83.1693	116.186	103.871		5.24293	3.72932	3.00067	3.53591	3.64964	2.40518		14.8661	11.424	9.41704	4.11281	6.65994	3.97554		31.0489	25.6235	31.8236	11.5942	13.9048	11.257	19.0283	9.31195		35.6033	32.5774	40.927	17.1651	19.2534	19.9588	32.156	22.8423
	12.4176	93.4333	87.5037	113.048	81.2992	116.315	104.211		4.99588	3.66917	2.79838	3.31492	3.60401	2.59019		14.9544	10.688	9.11809	4.11281	6.25631	3.66972		30.7211	24.8719	31.022	10.8696	14.0952	10.5066	18.6741	9.10502		35.405	32.8654	40.6209	17.0351	18.8605	20.3704	31.6289	22.4971
	12.4608	94.8035	86.8833	112.12	84.1535	115.755	103.063		4.83118	3.42857	2.69724	3.20442	3.69526	2.45143		14.5717	10.368	8.66966	3.64277	5.90313	3.77166		29.8272	25.0769	30.8216	11.1111	12.9524	10.1313	17.9656	8.69115		34.4793	30.9575	39.5278	17.2952	19.057	19.7531	31.5762	22.0944
	12.504	93.7952	88.7149	111.727	81.7913	114.808	103.871		4.44688	3.18797	2.56237	3.31492	3.37591	2.54394		13.9535	10.272	8.33333	3.76028	5.90313	3.41488		29.2908	23.9494	29.9399	10.7488	13.1429	9.94371	17.5607	8.43249		34.5785	30.5616	39.8776	16.9051	18.8605	18.7243	31.787	21.8642
	12.5473	93.4592	88.6854	110.321	81.7913	114.507	103.573		4.39198	3.24812	2.6298	3.53591	3.42153	2.45143		13.4825	10.08	8.10912	3.29025	5.6004	3.51682		28.7843	23.6078	30.0601	10.2657	12.381	9.7561	16.2449	8.27729		34.314	30.8495	38.3909	15.8648	18.2711	18.93	30.9963	21.9217
	12.5905	93.9762	88.9513	111.811	83.8583	113.517	104.381		4.28219	3.09774	2.49494	3.09392	3.28467	2.54394		13.2764	9.92	7.81016	3.52526	5.14632	3.21101		28.6949	23.3686	28.497	10.0242	12.1905	9.7561	16.8016	7.96689		34.281	30.3816	38.0411	15.8648	17.8782	18.7243	29.8893	21.0012
	12.6337	93.3299	88.9808	110.771	80.4134	115.54	100.085		3.98024	2.91729	2.59609	3.20442	3.14781	2.40518		12.5994	9.216	7.54858	3.52526	5.14632	3.00714		27.4434	23.027	27.7756	9.29952	12	9.56848	15.8907	7.50129		33.5207	29.9856	38.1723	15.6047	18.2711	19.3416	30.0474	20.771
	12.6769	92.6836	89.9261	110.574	79.9213	114.12	103.02		4.11749	2.82707	2.46123	2.87293	3.28467	2.40518		12.7465	9.152	7.06278	3.29025	4.99495	2.95617		27.0262	23.1636	26.8136	9.54106	11.619	9.19325	15.7895	7.75996		33.0909	29.5176	37.2103	15.7347	17.0923	18.3128	29.5203	20.4258
	12.7202	93.9245	88.5081	111.699	81.9882	116.315	102.977		3.81554	2.85714	2.66352	3.20442	3.10219	2.54394		12.4227	8.768	7.02541	2.93772	4.79314	3.00714		26.5197	22.8562	27.014	9.29952	11.619	8.63039	15.0304	7.50129		32.5289	30.0936	35.986	14.9545	18.0747	18.3128	28.9404	20.2532
	12.7634	94.2347	88.5968	108.436	81.6929	115.368	103.871		4.09004	2.55639	2.29265	3.09392	3.05657	2.49769		11.9223	8.704	6.68909	2.93772	4.74268	2.80326		27.1454	22.4804	26.2926	9.29952	11.0476	8.25516	14.9291	7.0357		32.562	29.0857	36.5107	14.9545	16.5029	18.5185	29.0459	19.3901
	12.8066	93.5626	88.5081	110.152	81.6929	117.434	102.935		3.78809	2.58647	2.25893	3.31492	3.01095	2.31267		11.7457	8.32	6.39013	2.58519	4.49041	2.70133		26.1025	21.8312	25.7715	9.05797	11.4286	8.81801	14.8279	6.82876		32.3967	28.7617	35.986	15.2146	17.8782	17.4897	28.3079	18.9298
	12.8499	93.2006	88.6854	111.277	83.0709	115.11	101.489		3.87044	2.55639	2.25893	2.98343	3.01095	2.31267		11.0686	8	6.05381	2.82021	4.13724	2.65036		26.2813	21.3188	25.491	8.69565	11.0476	8.63039	14.0688	6.62183		32.0992	27.5378	35.5925	14.8244	17.0923	17.9012	28.1497	19.1024
	12.8931	94.183	88.3604	109.308	81.3976	114.077	103.148		3.73319	2.52632	2.29265	3.09392	3.10219	2.26642		10.9508	7.712	6.09118	2.93772	4.18769	2.49745		25.298	21.4896	25.0902	8.69565	10.4762	7.87992	14.0182	6.31143		31.2727	28.2937	35.1552	14.3043	16.3065	17.0782	27.1481	18.5846
	12.9363	93.3299	87.74	109.814	81.2008	115.928	102.637		3.56849	2.49624	2.25893	2.87293	2.87409	2.26642		10.7448	7.392	5.68012	2.82021	4.03633	2.49745		26.0727	20.738	25.1303	7.85024	10.0952	8.25516	13.4615	6.4149		31.8017	27.7178	34.3682	14.1743	16.5029	17.0782	27.0427	18.412
	12.9795	97.1303	88.3013	112.064	80.8071	115.454	101.616		3.45869	2.28571	2.09036	3.20442	2.78285	2.31267		10.3621	7.296	5.64275	2.82021	3.68315	2.54842		25.3278	20.7721	24.1683	8.21256	9.90476	7.50469	12.6518	5.7941		30.5785	27.7538	33.7997	14.4343	17.2888	16.8724	26.0411	17.7215
	13.023	93.4592	88.5968	109.533	82.0866	116.1	102.084		3.40379	2.40602	2.29265	2.87293	2.73723	2.40518		10.1266	7.072	5.60538	2.82021	3.48133	2.34455		24.3445	20.4305	23.8477	7.6087	9.90476	7.87992	12.247	6.00103		31.2066	27.3218	33.4499	13.9142	15.9136	15.8436	25.514	18.0667
	13.0663	93.9762	88.5081	110.377	80.9055	116.703	102.212		3.40379	2.22556	2.09036	2.98343	2.78285	2.40518		9.80277	6.912	5.41854	2.82021	3.48133	2.24261		24.1955	19.8497	23.6072	7.72947	9.52381	7.69231	11.4372	5.84584		30.9091	26.3139	33.0564	13.264	15.5206	16.2551	25.883	17.5489
	13.1097	92.1148	88.3013	109.674	82.185	115.755	102.807		3.29399	2.22556	2.15779	3.20442	2.60036	2.17391		9.86164	6.72	5.15695	2.58519	3.22906	2.24261		23.5995	19.9863	22.3647	7.48792	9.52381	7.69231	11.4879	5.58717		30.8099	26.4219	32.488	13.264	15.3242	16.4609	25.0923	17.2037
	13.153	94.364	87.3264	110.349	82.185	114.808	103.573		3.21164	2.25564	2.09036	2.87293	2.55474	2.17391		9.53783	6.592	5.04484	2.46769	2.92634	2.24261		23.5101	19.3372	21.8437	7.24638	9.14286	6.75422	11.6903	5.38024		30.1818	26.3499	32.969	12.8739	15.9136	15.8436	24.2488	17.2037
	13.1962	94.8294	87.6809	108.549	80.5118	113.904	102.254		3.12929	2.22556	2.05664	2.87293	2.64599	2.35893		9.03739	6.432	5.08221	2.35018	2.92634	2.14067		23.0334	18.6197	22.1242	7.36715	9.90476	7.12946	10.7794	5.17331		29.9504	26.1339	32.4005	13.9142	16.11	16.0494	24.1434	16.6858
	13.2394	93.2523	87.4446	108.83	79.4291	113.431	102.382		2.88224	2.13534	2.09036	2.98343	2.55474	2.26642		9.03739	6.432	4.89537	2.35018	2.87588	2.0897		23.8975	18.5173	21.1222	7.00483	9.14286	7.12946	10.6781	5.12157		29.6198	26.2419	31.045	13.0039	15.1277	15.2263	23.4581	16.3982
	13.2827	93.0455	89.2467	109.336	81.2992	115.067	104.211		3.04694	1.98496	2.09036	3.31492	2.50912	2.08141		8.56638	6.368	4.59641	2.35018	2.92634	2.0897		22.0501	18.9614	21.4028	7.00483	8.7619	6.75422	9.7166	4.96637		30.7438	25.342	31.5697	12.8739	14.3418	15.2263	22.9309	16.5132
	13.3261	94.3382	88.8331	111.249	80.6102	115.411	102.339		2.85479	2.13534	2.02293	2.98343	2.50912	2.22017		8.47807	6.144	4.40957	2.11516	2.62361	1.88583		22.2288	18.6197	20.8417	6.88406	8.57143	7.31707	10.1721	5.22504		29.6529	24.91	30.739	12.4837	14.9312	15.8436	22.9309	15.7077
	13.3694	94.1572	89.5421	108.24	80.6102	113.646	105.062		2.96459	1.86466	2.05664	2.76243	2.55474	2.17391		8.30144	5.824	4.26009	2.35018	2.5227	1.88583		22.1692	17.9706	20.4409	6.28019	8.95238	6.75422	9.41296	4.86291		29.8182	25.6299	30.9576	12.7438	13.9489	15.8436	22.4565	15.4776
	13.4126	93.8211	87.0901	108.408	81.0039	114.765	104.381		2.79989	1.95489	2.05664	3.09392	2.37226	2.31267		8.18369	5.664	4.26009	2.23267	2.37134	1.83486		21.0369	17.9365	20.6012	6.40097	8.19048	6.19137	9.15992	4.81117		28.8595	25.126	30.4329	12.6138	14.5383	14.8148	22.0875	15.6502
	13.4558	92.2182	86.6765	106.862	81.8898	113.087	103.105		2.82734	1.86466	1.9555	2.98343	2.37226	2.17391		8.18369	5.568	4.14798	2.11516	2.47225	1.73293		21.1859	17.424	19.9198	6.03865	7.61905	5.81614	8.95749	4.55251		28.4298	25.09	29.8645	11.8336	13.7525	14.4033	21.4549	15.0173
	13.4991	95.424	86.6765	107.902	80.1181	113.689	103.488		2.79989	1.98496	2.05664	2.87293	2.28102	2.17391		7.71269	5.44	3.96114	2.35018	2.27043	1.88583		21.1859	17.5265	19.6794	5.7971	7.80952	5.4409	8.90688	4.55251		28.3306	24.0101	29.3835	12.3537	14.1454	14.4033	21.2968	15.3625
	13.5423	94.2089	87.7696	108.746	81.0039	112.699	102.722		2.58029	1.83459	2.05664	2.87293	2.37226	2.22017		7.77156	5.312	3.8864	2.23267	2.21998	1.9368		20.6496	16.8432	19.2385	6.28019	7.61905	5.81614	8.80567	4.50078		28.6281	23.2181	29.9519	11.8336	13.3595	14.4033	21.2441	14.9597
	13.5855	94.8811	89.099	108.802	81.9882	112.914	102.169		2.74499	1.89474	1.9555	2.98343	2.32664	2.17391		7.33	5.28	3.73692	2.23267	2.32089	1.78389		20.2622	17.2873	18.998	5.55556	7.42857	5.81614	8.45142	4.19038		27.7025	24.1901	28.0717	12.2237	14.1454	14.1975	21.0859	14.672
	13.6287	93.2523	88.065	110.096	78.7402	113.646	104.424		2.58029	1.68421	2.02293	3.09392	2.4635	2.12766		7.38887	4.928	3.81166	2.11516	2.01816	1.88583		20.739	16.809	18.517	5.91787	7.04762	5.62852	8.04656	4.08691		27.5372	23.8661	29.2086	11.3134	13.7525	14.1975	20.8751	14.2117
	Raw Data	4310	3828	4218	1062	3431	3367		4437	3889	4141	1049	3437	3257		4309	3910	4298	1048	3180	3318		4265	3907	4342	1066	973	954	3394	3286		4360	3999	4528	1088	1009	986	3450	3248
		4242	3841	4110	1049	3301	3299		4364	3897	4182	1023	3392	3255		4287	3890	4324	1022	3169	3148		4338	3948	4300	1028	971	922	3233	3154		4270	3877	4545	1063	1019	976	3369	3147
		4225	3859	4124	1060	3321	3225		4295	3812	4098	1011	3276	3149		4308	3824	4209	1048	3148	3121		4299	3844	4211	1047	975	929	3259	3161		4249	3965	4396	1056	982	939	3343	3081
		4196	3739	4158	1092	3275	3265		4261	3778	4023	1018	3212	3097		4228	3800	4170	1027	3087	3087		4248	3812	4169	1049	962	936	3219	3125		4158	3830	4460	1055	986	987	3302	3131
		4124	3725	4015	1078	3292	3125		4182	3748	4004	1023	3319	3060		4246	3830	4170	1012	3095	3080		4159	3872	4235	1047	958	915	3195	3165		4128	3851	4417	1063	958	961	3316	3126
		4069	3724	4031	1045	3227	3103		4162	3773	4013	996	3225	2977		4111	3763	4067	1014	3068	3077		4114	3818	4135	1030	940	908	3153	3127		4013	3742	4344	1056	952	959	3285	3065
		4179	3687	3958	1087	3188	3131		4137	3694	3966	983	3197	3018		4131	3715	4032	1036	3048	3050		4079	3760	4103	1052	952	904	3222	3132		4039	3757	4297	1059	935	947	3300	3037
		4146	3674	4022	1090	3111	3151		4062	3732	3938	999	3200	2953		4121	3694	4005	1026	3011	3028		4192	3715	4134	1046	931	888	3150	3074		4019	3653	4289	1045	943	944	3231	3014
		4005	3623	3967	1093	3092	3129		4137	3758	3900	978	3208	2970		4091	3714	3939	1030	2959	3030		4143	3750	4102	1043	913	886	3144	3074		4049	3823	4224	1067	937	937	3205	3030
		4041	3611	3894	1083	3106	3093		4200	3706	3893	997	3145	2973		4084	3704	3945	990	2979	2998		4187	3684	4098	1027	930	899	3124	3076		4046	3743	4209	1028	934	930	3187	2942
		3995	3636	3937	1061	3047	3069		4097	3624	3909	998	3110	2960		4116	3684	3915	1030	2979	3018		4132	3663	4021	1030	915	878	3047	3074		3960	3684	4053	1039	941	926	3162	2971
		4133	3513	3958	1057	3079	3078		4063	3657	3905	1002	3121	3005		4084	3671	3904	1004	2934	2972		4077	3670	3999	1025	936	874	3045	3013		3911	3670	4096	1047	935	922	3140	2943
		4016	3602	3875	1075	3025	3074		4006	3590	3839	975	3096	2974		4055	3617	3894	1023	2971	2987		4128	3695	4041	1052	926	859	3019	3041		4034	3742	4073	1036	906	913	3104	3043
		3981	3530	3856	1067	3011	3090		4028	3618	3867	1003	3153	2977		4074	3579	3939	1012	2876	3003		3999	3618	3970	1045	895	879	2999	2997		3962	3608	3933	1043	906	901	3085	2958
		3988	3550	3926	1084	2986	3033		4158	3634	3820	986	3100	2973		4114	3582	3963	1005	2876	3024		4098	3617	3970	1046	916	867	2987	3024		3952	3581	4034	1052	934	912	3144	2908
		4109	3621	3893	1050	3007	3102		4098	3560	3854	1005	3048	2942		3982	3590	3889	985	2894	2914		4095	3566	3951	1028	918	878	2984	3063		3961	3723	4007	1035	887	894	3065	2918
		3973	3489	3911	1076	3000	3062		4075	3619	3840	995	3029	2939		4039	3563	3937	1000	2828	2952		4126	3579	3979	1030	896	862	3038	3071		3860	3714	3966	1051	915	894	3064	2912
		3956	3516	3892	1057	2957	3102		4088	3592	3759	981	3013	2987		4034	3509	3866	992	2857	2992		4116	3554	3979	999	905	870	2966	3025		3919	3517	3905	1027	891	894	3022	2962
		4010	3492	3867	1065	2956	3023		3972	3564	3778	1000	3001	2967		4036	3501	3773	1019	2836	2884		4093	3580	3925	1037	888	848	2967	2966		3948	3647	3923	1018	889	884	3016	2916
		3993	3496	3934	1052	2973	3073		4091	3526	3803	960	2987	2996		3984	3579	3816	989	2776	2969		3989	3612	4006	1034	872	848	2948	2973		3902	3666	3943	1028	888	902	3003	2912
		3988	3496	3844	1084	2981	3090		4011	3507	3757	975	3007	2921		4042	3525	3873	1004	2823	2939		4071	3602	3954	1006	887	842	2924	2978		3939	3693	3840	1015	885	874	3074	2907
		4053	3435	3875	1076	2981	3061		3919	3564	3831	956	3000	2954		4043	3478	3816	984	2782	2900		3980	3539	3945	998	888	868	2930	2961		3844	3531	3888	1045	883	885	3022	2922
		3989	3474	3783	1082	2967	3056		3979	3622	3804	963	2998	2902		3991	3489	3785	978	2805	2903		4010	3535	3849	1032	888	859	2924	2975		3860	3637	3873	1008	867	886	3073	2878
		4047	3466	3853	1064	2988	3058		3924	3537	3768	982	2979	2917		3975	3478	3765	975	2784	2879		3981	3527	3920	999	885	846	2946	2956		3882	3529	3880	1015	881	872	2999	2924
		3959	3443	3827	1057	2948	3117		4054	3475	3748	966	2988	2939		3942	3581	3761	962	2814	2878		3997	3539	3871	1005	880	847	2934	2981		3858	3602	3838	1016	891	881	2993	2859
		3957	3468	3791	1059	2947	3092		3920	3547	3744	944	2946	2935		3971	3480	3691	962	2786	2847		3988	3548	3900	978	877	850	2869	2956		3916	3621	3831	1026	875	874	2974	2879
		3882	3423	3796	1070	2927	3063		3953	3498	3690	953	2937	2869		3949	3492	3672	964	2847	2887		4022	3529	3815	1005	880	843	2883	2984		3833	3549	3794	999	863	877	2980	2880
		3982	3462	3732	1080	2855	3004		4055	3514	3678	967	2981	2930		3914	3512	3724	984	2750	2896		3951	3485	3798	1011	869	848	2887	2883		3867	3588	3822	1002	869	873	2943	2831
		3983	3468	3812	1040	2892	3046		4026	3527	3725	955	2994	2861		3924	3476	3693	964	2804	2829		3932	3538	3824	987	854	845	2932	2913		3823	3456	3763	1010	881	879	2968	2924
		3953	3460	3797	1062	2958	3035		3991	3503	3681	945	2953	2900		3921	3455	3696	957	2770	2840		3967	3472	3777	1006	877	827	2904	2897		3802	3550	3837	1002	886	863	2997	2867
		3986	3495	3746	1064	2977	3054		3959	3508	3713	951	2978	2915		4024	3437	3709	968	2794	2875		3965	3525	3847	1023	851	841	2841	2907		3788	3590	3780	1003	868	870	2921	2867
		3945	3419	3736	1054	2944	3074		3963	3512	3661	924	2974	2932		3960	3448	3686	959	2724	2859		3941	3523	3797	1002	874	830	2864	2935		3754	3403	3716	1013	850	867	2903	2800
		3928	3431	3766	1076	2920	2983		4011	3523	3699	948	2965	2905		3954	3467	3696	975	2773	2859		3949	3482	3770	1006	860	837	2833	2930		3746	3523	3758	1008	879	865	2944	2842
		3914	3463	3706	1044	2895	3050		3846	3480	3647	956	2959	2869		3966	3445	3657	973	2835	2880		3901	3472	3765	1015	859	856	2894	2915		3812	3518	3726	1006	871	865	2967	2836
		3907	3472	3720	1047	2894	3072		4006	3508	3659	951	2923	2918		3919	3497	3656	975	2779	2849		3951	3454	3818	1001	856	829	2900	2911		3797	3501	3796	1009	886	860	2949	2872
		3861	3468	3728	1064	2913	2982		3931	3455	3643	951	2975	2914		3983	3487	3686	960	2745	2869		3960	3467	3860	1016	882	844	2921	2913		3717	3379	3768	998	856	861	2931	2873
		3834	3450	3746	1047	2924	3078		3962	3449	3676	960	2925	2852		3880	3433	3706	958	2743	2866		3934	3468	3796	989	850	820	2867	2957		3739	3474	3733	1002	862	853	2919	2858
		4030	3481	3715	1024	2906	2997		3955	3471	3666	963	2970	2945		3963	3427	3657	977	2765	2888		4030	3465	3838	984	856	831	2899	2961		3748	3394	3697	1025	863	863	2923	2853
		3892	3451	3686	1056	2972	2974		3857	3466	3643	954	2911	2882		3956	3411	3778	972	2775	2832		3930	3505	3807	985	871	853	2873	2932		3755	3489	3762	1011	855	853	2935	2866
		3892	3364	3680	1041	2943	2993		3866	3491	3671	957	2998	2978		3892	3477	3700	971	2736	2818		3968	3439	3774	1006	862	830	2863	2945		3667	3473	3760	1023	846	857	2919	2831
		3956	3457	3686	1057	2898	3032		3882	3450	3654	946	2864	2926		3941	3408	3665	959	2766	2818		3892	3481	3804	979	864	819	2838	2919		3760	3459	3762	997	845	872	2931	2895
		3899	3416	3688	1056	2921	3013		3953	3460	3609	950	2956	2909		3918	3469	3672	958	2790	2835		3976	3468	3819	984	856	831	2909	2889		3694	3432	3745	1011	869	856	2923	2857
		3923	3420	3718	1074	2857	2960		4002	3441	3698	957	2915	2939		3924	3431	3688	1000	2703	2854		3943	3459	3814	993	864	822	2805	2914		3714	3426	3770	1015	862	866	2962	2851
		3933	3371	3682	1034	2920	2961		3944	3472	3623	975	2892	2933		3967	3469	3684	949	2738	2822		3938	3440	3823	1002	869	832	2869	2949		3735	3285	3778	1011	860	830	2874	2854
		3875	3377	3670	1067	2883	3033		3931	3495	3614	949	2869	2936		3957	3424	3640	968	2750	2889		3904	3517	3737	964	857	835	2849	2938		3806	3444	3728	983	861	842	2864	2865
		3941	3333	3685	1036	2919	3058		3876	3423	3631	954	2950	2847		3941	3470	3659	980	2738	2868		3863	3448	3783	999	865	832	2880	2891		3741	3333	3697	1003	867	842	2911	2892
		3840	3384	3680	1045	2946	3021		3870	3447	3707	945	2913	2904		3887	3411	3657	987	2720	2888		3944	3412	3757	987	857	844	2832	2927		3769	3342	3748	981	839	864	2940	2804
		3836	3412	3651	1050	2875	3016		3940	3457	3659	947	2909	2866		3865	3436	3637	963	2754	2840		3853	3449	3796	997	843	809	2869	2900		3674	3407	3745	989	855	855	2927	2806
		3826	3401	3673	1035	2910	2976		3966	3428	3633	938	2846	2890		3845	3409	3605	964	2734	2857		3911	3396	3735	966	858	801	2859	2908		3709	3346	3676	993	863	845	2896	2828
		3892	3366	3642	1040	2925	2963		3940	3412	3637	928	2903	2897		3933	3445	3647	963	2707	2881		3942	3403	3763	980	852	819	2804	2923		3657	3315	3680	1003	840	851	2906	2833
		3940	3378	3638	1032	2870	2970		3919	3428	3651	941	2842	2909		3938	3402	3690	957	2746	2858		3917	3439	3805	1007	853	810	2866	2920		3758	3404	3720	992	839	850	2910	2834
		3797	3412	3704	1057	2844	2965		3886	3447	3658	963	2930	2898		3935	3449	3661	966	2757	2876		3903	3431	3777	994	838	819	2958	2924		3690	3344	3720	998	851	835	2938	2862
		3914	3326	3622	1046	2864	2997		3885	3428	3678	959	2856	2891		3915	3362	3660	950	2756	2821		3884	3437	3764	975	835	828	2818	2869		3675	3424	3666	1008	862	840	2883	2880
		3848	3357	3645	1061	2865	2942		3900	3330	3636	936	2929	2844		3883	3367	3622	967	2700	2852		3957	3497	3767	979	844	837	2844	2870		3772	3389	3711	1020	842	861	2908	2792
		3854	3368	3576	1040	2837	2950		3852	3447	3602	961	2855	2822		3929	3493	3682	956	2737	2805		3907	3398	3735	963	841	817	2794	2901		3645	3419	3789	1013	871	825	2917	2824
		3921	3296	3709	1030	2858	2918		3879	3458	3630	955	2873	2850		3897	3391	3634	975	2695	2841		3849	3383	3734	997	843	822	2851	2920		3744	3380	3703	1006	859	859	2903	2769
		3775	3331	3621	1038	2796	2964		3850	3416	3648	941	2872	2913		3847	3382	3647	971	2673	2879		3865	3440	3780	990	855	823	2819	2854		3661	3364	3737	983	854	842	2913	2809
		3860	3348	3608	1047	2843	2950		3853	3419	3638	954	2858	2867		3932	3454	3641	945	2701	2836		3910	3355	3792	989	858	829	2850	2906		3690	3287	3703	987	860	838	2912	2821
		3986	3357	3667	1034	2824	2948		3909	3384	3585	939	2863	2898		3848	3469	3600	963	2733	2849		3892	3403	3766	975	834	821	2862	2883		3639	3380	3664	1015	834	851	2904	2839
		3831	3473	3629	1040	2927	2916		3875	3429	3632	926	2872	2860		3880	3410	3674	929	2663	2783		3899	3410	3720	983	845	819	2819	2893		3694	3305	3667	1003	852	821	2893	2828
		3836	3336	3668	1036	2876	2912		3888	3412	3642	949	2784	2903		3895	3399	3635	948	2658	2819		3939	3394	3745	979	841	813	2854	2852		3650	3366	3632	973	847	830	2926	2820
		3802	3365	3641	1031	2822	2933		3901	3430	3604	939	2898	2901		3872	3396	3634	958	2684	2864		3953	3453	3744	975	842	817	2839	2914		3758	3246	3657	994	855	836	2921	2832
		3906	3420	3659	1064	2819	2936		3909	3418	3540	949	2889	2853		3877	3350	3658	966	2666	2779		3975	3399	3739	967	846	828	2823	2930		3663	3401	3704	1010	859	845	2887	2816
		3798	3344	3702	1008	2822	2940		3868	3393	3577	933	2872	2837		3774	3395	3644	943	2662	2861		3986	3376	3754	959	834	832	2812	2886		3788	3241	3731	1000	843	825	2875	2807
		3918	3368	3690	1025	2875	2907		3832	3359	3613	923	2902	2887		3944	3353	3642	945	2657	2827		3850	3426	3733	994	835	829	2850	2854		3711	3334	3702	980	840	845	2852	2825
		3823	3375	3621	1034	2843	2952		3885	3396	3611	928	2858	2802		3948	3335	3598	959	2715	2806		3958	3379	3738	990	849	807	2834	2854		3723	3214	3759	987	850	830	2864	2799
		3849	3388	3550	1022	2869	2936		3943	3381	3607	950	2834	2868		3863	3393	3581	945	2711	2867		3879	3461	3749	963	834	829	2803	2848		3782	3279	3705	1008	850	829	2871	2852
		3871	3290	3616	1027	2822	2864		3831	3341	3573	920	2847	2869		3888	3339	3659	959	2660	2844		3903	3380	3740	988	824	805	2841	2849		3661	3296	3687	989	826	836	2868	2800
		3880	3332	3584	1036	2821	2921		3831	3358	3631	943	2864	2814		3819	3354	3575	968	2615	2811		3796	3397	3686	974	827	822	2788	2871		3724	3368	3653	983	854	844	2831	2747
		3768	3311	3598	1037	2905	2915		3839	3373	3564	941	2864	2936		3888	3333	3610	953	2652	2843		3883	3369	3766	986	844	821	2808	2852		3663	3346	3657	1000	846	823	2836	2804
		3782	3332	3547	1038	2855	2876		3892	3373	3530	924	2834	2841		3789	3357	3611	959	2657	2841		3802	3407	3693	953	846	794	2818	2892		3675	3305	3656	994	823	839	2908	2824
		3742	3316	3604	1009	2874	2979		3763	3348	3543	920	2804	2897		3837	3371	3607	946	2623	2774		3860	3452	3719	959	817	814	2831	2878		3600	3355	3699	973	842	825	2893	2789
		3842	3398	3584	1040	2848	2908		3836	3375	3525	941	2916	2827		3813	3320	3594	946	2648	2810		3901	3360	3748	962	821	825	2908	2867		3627	3184	3647	967	839	827	2887	2824
		3878	3363	3596	1028	2883	2883		3812	3364	3597	944	2852	2852		3827	3407	3639	952	2672	2855		3833	3392	3725	951	822	815	2833	2910		3693	3257	3604	995	847	836	2872	2786
		3892	3360	3547	1022	2796	2928		3708	3341	3498	938	2812	2892		3788	3359	3580	936	2669	2795		3902	3417	3715	969	851	823	2768	2904		3725	3403	3613	959	850	824	2895	2835
		3766	3266	3620	1020	2805	2854		3776	3355	3594	931	2797	2848		3932	3310	3643	924	2672	2813		3834	3377	3634	960	834	807	2829	2869		3607	3235	3660	984	814	835	2872	2826
		3803	3338	3548	1024	2824	2848		3844	3346	3521	924	2850	2863		3856	3401	3627	942	2624	2781		3828	3382	3710	964	826	808	2821	2830		3623	3347	3648	977	838	824	2863	2768
		3804	3331	3579	1031	2879	2887		3749	3330	3549	910	2858	2803		3742	3332	3647	958	2621	2863		3845	3360	3756	955	835	821	2791	2864		3582	3361	3652	976	824	824	2931	2824
		3832	3328	3551	1032	2786	2836		3818	3317	3594	926	2848	2794		3874	3373	3624	961	2656	2816		3852	3355	3720	943	830	811	2759	2893		3613	3325	3669	980	835	830	2875	2814
		3747	3288	3481	1028	2799	2858		3811	3325	3555	933	2830	2901		3781	3353	3594	966	2697	2791		3807	3366	3787	938	828	812	2798	2874		3557	3309	3649	1002	837	815	2850	2876
		3822	3307	3575	1036	2876	2930		3833	3400	3538	914	2832	2857		3789	3370	3568	971	2628	2837		3794	3375	3743	956	822	809	2774	2914		3667	3387	3634	978	818	837	2889	2871
		3826	3286	3556	1041	2831	2905		3791	3366	3503	933	2878	2835		3808	3312	3578	931	2682	2812		3848	3336	3741	964	832	813	2820	2817		3641	3363	3631	990	828	818	2858	2812
		3774	3334	3590	1027	2799	2882		3815	3339	3589	925	2807	2848		3838	3355	3598	950	2645	2810		3853	3399	3676	943	824	823	2780	2879		3639	3204	3605	975	842	828	2836	2849
		3752	3321	3522	1046	2791	2913		3870	3395	3533	937	2786	2860		3832	3326	3582	952	2668	2821		3905	3341	3642	958	827	821	2766	2857		3657	3216	3593	972	834	812	2853	2776
		3742	3321	3599	1038	2879	2896		3840	3441	3534	925	2827	2854		3799	3311	3557	949	2638	2748		3830	3344	3694	959	821	818	2757	2862		3613	3235	3601	944	834	831	2905	2739
		3789	3313	3538	1023	2817	2811		3819	3351	3479	925	2831	2818		3822	3291	3574	932	2655	2829		3900	3366	3684	942	824	801	2800	2875		3721	3259	3583	976	824	828	2808	2797
		3766	3271	3576	1045	2826	2832		3851	3367	3518	927	2808	2883		3799	3382	3628	932	2599	2742		3886	3361	3716	958	825	821	2829	2866		3555	3194	3657	951	810	819	2858	2785
		3742	3253	3555	1065	2795	2897		3837	3360	3580	925	2829	2878		3774	3372	3571	943	2633	2805		3824	3343	3748	950	812	828	2800	2839		3680	3236	3681	992	822	795	2884	2771
		3805	3304	3593	1046	2846	2863		3770	3387	3532	930	2797	2844		3866	3361	3565	936	2669	2782		3785	3399	3696	959	831	800	2797	2837		3707	3269	3645	966	809	833	2865	2808
		4126	3673	3969	969	2761	2469		4149	3887	3839	891	2802	2449		4279	3764	3995	895	2636	2379		4275	3763	4024	957	586	589	2789	2462		4116	3719	3828	936	586	590	2832	2420
		4094	3688	4027	978	2764	2474		4189	3826	3815	890	2878	2443		4276	3756	3937	902	2650	2347		4346	3706	3959	948	605	591	2795	2419		4101	3801	3809	947	604	591	2878	2358
		4045	3695	4037	960	2761	2500		4217	3817	3829	882	2832	2442		4354	3768	3797	910	2604	2353		4257	3680	3970	958	603	575	2765	2432		4076	3770	3896	956	597	606	2843	2401
		4188	3650	4002	991	2804	2436		4228	3877	3813	890	2830	2435		4188	3792	3863	903	2678	2359		4282	3680	3996	964	599	569	2718	2406		4119	3801	3878	972	587	603	2793	2396
		4093	3672	3992	982	2813	2417		4209	3831	3795	923	2794	2487		4288	3697	3901	895	2626	2361		4364	3736	4007	968	601	578	2755	2454		4098	3722	3915	951	580	602	2824	2353
		4058	3700	4007	1005	2807	2435		4236	3842	3835	910	2795	2434		4252	3748	3833	894	2599	2367		4237	3636	3993	976	591	581	2714	2410		4035	3779	3817	948	584	594	2842	2384
		4079	3663	4045	994	2767	2507		4114	3814	3775	889	2797	2430		4286	3716	3803	904	2669	2428		4186	3697	3990	952	597	580	2712	2487		4114	3647	3805	944	576	600	2792	2399
		4081	3649	3908	989	2804	2472		4163	3856	3793	890	2831	2403		4169	3699	3833	879	2636	2399		4306	3640	3949	968	620	597	2735	2428		4110	3698	3838	941	594	603	2807	2361
		4134	3637	4016	976	2796	2489		4165	3813	3804	872	2789	2449		4335	3704	3888	892	2686	2335		4314	3723	3888	945	602	585	2731	2408		4039	3841	3881	927	585	599	2781	2332
		4117	3612	3959	975	2828	2450		4121	3841	3784	874	2801	2382		4169	3745	3783	884	2655	2392		4317	3698	3919	944	602	575	2724	2444		4055	3729	3801	924	600	597	2789	2403
		4150	3634	3997	959	2763	2456		4122	3873	3843	878	2772	2439		4245	3715	3781	886	2634	2365		4221	3631	3973	937	602	573	2779	2428		3989	3764	3746	955	598	603	2747	2390
		4083	3681	3943	986	2761	2462		4077	3826	3766	905	2858	2413		4275	3735	3748	908	2652	2330		4251	3731	3866	948	598	584	2746	2430		4105	3728	3817	942	582	610	2851	2322
		4128	3688	3867	995	2762	2454		4128	3738	3850	903	2797	2412		4255	3685	3821	895	2662	2359		4274	3735	3891	951	597	584	2764	2427		4008	3697	3816	933	608	597	2852	2365
		4108	3622	3960	970	2856	2465		4149	3777	3794	877	2787	2397		4225	3690	3771	888	2632	2329		4182	3719	3898	949	603	574	2749	2461		3985	3756	3753	941	591	594	2777	2351
		4096	3603	3887	975	2773	2444		4096	3798	3750	891	2843	2368		4244	3720	3778	901	2686	2360		4296	3784	3847	959	597	575	2738	2373		4031	3673	3847	946	609	604	2819	2353
		4114	3686	3900	968	2728	2456		4100	3798	3738	888	2851	2404		4154	3658	3784	884	2652	2329		4235	3758	3928	965	611	573	2730	2422		4058	3603	3756	934	610	614	2810	2346
		4166	3660	3916	978	2842	2419		4200	3831	3732	892	2787	2390		4147	3653	3738	881	2676	2327		4210	3683	3879	943	609	591	2731	2419		4032	3688	3776	940	592	605	2775	2366
		4233	3581	3884	974	2718	2480		4141	3712	3727	895	2758	2393		4160	3641	3773	931	2560	2334		4245	3695	3885	936	608	581	2738	2389		3959	3682	3762	928	595	603	2768	2364
		4021	3584	3865	967	2743	2449		4134	3743	3718	902	2797	2376		4217	3681	3806	900	2606	2328		4241	3651	3892	951	591	581	2730	2432		4061	3580	3790	946	595	595	2811	2349
		4096	3598	3948	950	2752	2402		4197	3744	3713	887	2798	2404		4115	3694	3757	889	2626	2313		4209	3634	3917	932	609	600	2643	2400		3997	3675	3812	946	586	600	2753	2348
		4116	3596	3935	975	2763	2437		4113	3736	3766	883	2773	2366		4201	3622	3754	900	2595	2325		4224	3594	3866	941	583	586	2762	2376		4022	3615	3776	933	587	583	2840	2346
		4092	3608	3896	973	2709	2457		4094	3666	3742	891	2694	2402		4227	3644	3769	896	2590	2381		4266	3657	3802	951	584	575	2670	2425		3944	3585	3751	941	572	584	2800	2341
		4115	3632	3938	970	2730	2455		4131	3752	3783	889	2720	2411		4147	3579	3823	872	2590	2345		4237	3661	3877	952	587	586	2718	2434		3930	3751	3796	958	584	587	2773	2330
		4094	3612	3951	954	2699	2422		4111	3757	3720	899	2755	2425		4086	3626	3772	898	2625	2288		4300	3678	3852	963	592	567	2726	2413		4142	3739	3728	954	585	594	2743	2310
		4000	3609	3871	969	2729	2444		4153	3743	3802	898	2726	2412		4091	3647	3785	883	2566	2329		4245	3663	3929	954	590	598	2685	2409		3912	3642	3768	939	583	594	2783	2344
		3970	3552	3855	964	2663	2427		4118	3729	3717	898	2715	2401		4106	3654	3741	889	2572	2321		4149	3614	3888	948	601	585	2744	2371		4028	3686	3771	931	599	580	2784	2337
		3972	3587	3833	948	2748	2447		4074	3694	3713	895	2789	2403		4125	3615	3720	877	2565	2327		4157	3603	3885	951	586	598	2653	2373		3914	3725	3768	930	568	600	2750	2366
		4037	3583	3874	955	2716	2388		4036	3737	3797	885	2733	2338		4077	3604	3783	885	2533	2332		4162	3631	3854	939	599	578	2707	2384		3895	3646	3777	947	577	587	2757	2390
		4016	3512	3821	952	2739	2409		4076	3696	3772	884	2770	2363		4058	3596	3764	878	2584	2353		4204	3635	3865	929	593	585	2662	2425		3915	3733	3738	932	592	577	2772	2356
		4054	3567	3799	949	2750	2429		3985	3719	3742	895	2774	2364		4113	3580	3761	864	2559	2328		4163	3568	3846	946	595	574	2697	2380		3898	3628	3758	927	575	583	2765	2294
		3868	3385	3556	1016	2323	2351		3643	3325	2966	905	2192	2162		3397	3125	2676	851	1982	1962		3356	2927	2495	828	525	533	1976	1933		3025	2778	2287	769	509	486	1897	1738
		4017	3442	3511	1038	2281	2339		3654	3325	2916	894	2149	2191		3446	3077	2663	830	1943	1970		3333	2953	2498	829	531	527	1973	1896		3038	2776	2277	764	496	482	1895	1719
		3874	3473	3427	1063	2294	2345		3607	3296	2924	889	2161	2169		3377	3089	2599	835	1946	1955		3276	2904	2483	807	554	519	1971	1904		3011	2828	2278	747	474	486	1894	1694
		3822	3475	3455	1032	2274	2329		3583	3319	2844	914	2161	2187		3282	3037	2572	822	1913	1972		3175	2865	2436	824	523	512	1939	1897		2919	2821	2252	745	490	476	1877	1674
		3916	3409	3436	1042	2265	2336		3550	3289	2868	901	2146	2177		3251	3040	2608	843	1914	1975		3165	2829	2481	797	519	512	1920	1864		2878	2750	2262	749	480	469	1844	1710
		3863	3475	3419	1047	2277	2363		3554	3304	2841	891	2138	2182		3262	3056	2575	811	1934	1965		3173	2868	2473	791	524	497	1911	1840		2834	2711	2241	732	479	489	1831	1676
		3888	3405	3442	1055	2227	2365		3679	3291	2829	883	2154	2166		3283	3025	2557	782	1881	1932		3097	2831	2475	790	518	504	1892	1820		2808	2678	2225	740	464	482	1813	1674
		3835	3480	3407	1058	2302	2352		3533	3269	2834	888	2113	2127		3221	3024	2600	813	1887	1925		3161	2794	2433	795	511	498	1845	1881		2814	2698	2194	730	469	468	1793	1660
		3850	3507	3391	1049	2273	2330		3592	3252	2855	854	2138	2149		3214	3043	2566	795	1910	1922		3048	2816	2372	777	495	490	1872	1781		2765	2628	2213	718	466	454	1796	1633
		3875	3486	3401	1030	2297	2370		3608	3215	2854	873	2134	2120		3285	2995	2512	805	1857	1907		3133	2795	2366	754	508	488	1859	1792		2777	2570	2214	711	464	453	1749	1644
		3870	3445	3408	1059	2230	2366		3562	3273	2801	870	2138	2093		3181	3005	2531	795	1908	1945		3074	2783	2378	758	495	500	1844	1791		2799	2637	2128	711	461	463	1801	1612
		3861	3456	3391	1037	2294	2388		3547	3221	2877	859	2087	2102		3227	2990	2493	785	1865	1856		3053	2762	2360	757	498	490	1883	1784		2726	2655	2161	709	462	450	1769	1585
		3903	3378	3345	1066	2349	2318		3495	3217	2803	860	2114	2087		3196	2966	2522	791	1882	1849		3058	2811	2352	754	501	482	1820	1755		2719	2595	2126	682	439	438	1735	1569
		3875	3463	3425	1036	2219	2401		3541	3146	2764	848	2117	2066		3204	2906	2469	793	1841	1862		3048	2736	2359	751	510	476	1806	1769		2711	2650	2067	682	455	439	1740	1586
		3936	3409	3380	1051	2293	2362		3445	3184	2780	869	2135	2058		3132	2958	2454	804	1864	1849		2986	2690	2322	739	490	480	1827	1736		2730	2555	2104	695	444	447	1712	1559
		3925	3409	3318	1051	2286	2360		3516	3205	2743	861	2107	2081		3124	2942	2472	789	1859	1842		3008	2718	2334	747	486	474	1836	1747		2740	2479	2119	684	446	434	1694	1571
		3927	3376	3423	1047	2223	2290		3479	3196	2772	838	2084	2055		3168	2893	2445	777	1839	1858		3028	2697	2281	752	489	474	1810	1743		2663	2534	2076	676	431	430	1747	1564
		3738	3414	3379	1032	2247	2365		3501	3175	2744	856	2096	2043		3089	2918	2420	772	1811	1845		2979	2703	2288	729	480	467	1834	1730		2732	2496	2099	692	432	432	1705	1553
		3766	3390	3363	1029	2282	2358		3468	3137	2741	860	2062	2024		3062	2927	2448	775	1833	1848		2866	2632	2270	731	468	469	1779	1699		2618	2536	2052	670	434	441	1689	1559
		3810	3337	3347	1042	2280	2390		3422	3148	2736	860	2038	2059		3078	2837	2469	771	1817	1855		2908	2674	2283	734	483	468	1793	1724		2618	2537	2055	653	428	428	1662	1529
		3751	3424	3361	1025	2237	2341		3390	3117	2758	847	2062	2047		3041	2920	2449	770	1798	1833		2940	2604	2282	729	478	467	1765	1789		2611	2420	2050	667	423	419	1685	1574
		3806	3364	3306	1023	2237	2303		3364	3120	2704	868	2042	2055		3051	2871	2476	796	1815	1814		2928	2628	2329	730	470	461	1775	1749		2568	2401	2017	675	415	427	1646	1526
		3816	3352	3400	1031	2248	2349		3474	3133	2752	840	2078	2090		3043	2895	2435	764	1793	1812		2872	2600	2278	729	473	447	1741	1713		2607	2445	2021	668	425	416	1643	1532
		3824	3403	3367	1011	2235	2303		3331	3147	2753	840	2048	2076		3005	2829	2475	747	1795	1838		2801	2642	2264	721	463	468	1749	1728		2589	2459	2026	646	422	412	1650	1504
		3739	3410	3369	1016	2245	2349		3369	3143	2688	837	2061	2066		3052	2860	2417	760	1780	1798		2894	2617	2235	718	483	472	1724	1721		2541	2453	2006	658	424	404	1642	1527
		3813	3389	3333	1020	2224	2343		3394	3059	2741	861	2035	2015		3059	2843	2375	747	1779	1813		2859	2621	2228	723	455	468	1729	1692		2524	2444	1999	648	409	409	1620	1518
		3721	3358	3364	1038	2239	2305		3365	3124	2679	846	2031	2040		2966	2864	2484	751	1773	1770		2848	2602	2204	695	458	452	1736	1707		2494	2458	1995	649	417	408	1594	1521
		3804	3372	3260	1064	2248	2340		3303	3103	2693	832	2031	2062		2958	2827	2372	765	1808	1788		2798	2579	2200	731	462	454	1728	1704		2503	2393	2008	652	416	419	1606	1496
		3783	3430	3277	1014	2252	2344		3367	3164	2685	833	2032	2046		2936	2784	2397	752	1746	1778		2796	2576	2226	691	471	456	1719	1681		2444	2360	1966	639	400	410	1617	1470
		3753	3399	3297	1022	2213	2350		3325	3109	2719	834	2017	2046		2996	2805	2379	747	1757	1798		2876	2559	2200	697	455	456	1738	1690		2436	2407	2009	649	414	406	1602	1484
		3706	3391	3282	1054	2242	2330		3337	3091	2680	831	2023	2040		2973	2838	2381	741	1748	1789		2782	2594	2232	703	461	442	1711	1650		2456	2387	1943	649	404	412	1584	1465
		3746	3371	3283	1033	2222	2267		3304	3044	2661	843	2028	2055		2951	2811	2405	732	1738	1771		2828	2537	2203	711	460	447	1709	1649		2497	2398	1956	625	402	416	1645	1497
		3787	3415	3299	1037	2260	2293		3355	3068	2697	817	2029	2023		3013	2810	2458	740	1769	1773		2792	2567	2173	689	447	454	1719	1656		2482	2387	1962	635	399	408	1593	1496
		3716	3380	3310	1057	2324	2292		3351	3065	2661	843	2030	2021		2994	2779	2409	740	1776	1796		2758	2552	2153	711	465	446	1703	1645		2444	2356	1970	636	411	400	1599	1460
		3720	3414	3288	1020	2227	2251		3416	3085	2686	801	2025	2032		2963	2811	2380	740	1734	1800		2755	2558	2196	697	455	451	1695	1688		2403	2394	1966	619	387	401	1565	1443
		3711	3323	3320	1039	2218	2335		3358	3110	2670	823	2035	1996		3009	2804	2350	726	1767	1759		2720	2528	2172	694	461	445	1700	1638		2382	2352	1944	610	401	395	1587	1440
		3799	3433	3292	1026	2250	2308		3443	3136	2618	828	2037	2026		2916	2811	2351	736	1755	1764		2752	2529	2157	677	459	449	1695	1656		2359	2286	1938	616	399	405	1545	1439
		3691	3404	3259	1033	2237	2285		3338	3075	2685	818	2016	2027		2997	2827	2359	724	1728	1774		2775	2476	2177	695	456	441	1683	1663		2400	2272	1972	619	392	415	1588	1475
		3814	3392	3290	1029	2230	2274		3388	3089	2631	822	2053	2000		2966	2794	2320	719	1729	1767		2757	2537	2191	684	445	428	1680	1631		2380	2360	1962	625	395	389	1584	1427
		3706	3421	3250	1024	2241	2239		3288	3068	2695	798	2021	2008		2937	2778	2319	717	1764	1739		2723	2529	2132	678	446	442	1703	1644		2408	2327	1923	617	392	399	1575	1438
		3689	3386	3269	1040	2276	2303		3370	3032	2674	813	2019	1997		2998	2765	2374	733	1790	1726		2709	2543	2133	666	452	436	1712	1624		2419	2335	1933	625	398	402	1560	1424
		3754	3481	3261	1020	2210	2276		3328	3059	2611	793	2031	1978		2903	2764	2332	727	1731	1771		2736	2518	2133	665	448	439	1688	1615		2379	2322	1877	613	388	393	1589	1444
		3722	3472	3282	1047	2218	2265		3366	3069	2668	811	2010	1998		2923	2767	2339	727	1696	1758		2707	2494	2107	659	430	433	1704	1625		2314	2288	1870	618	386	392	1573	1426
		3746	3435	3274	1050	2226	2265		3349	3140	2619	807	1979	1970		2892	2775	2337	744	1717	1762		2682	2499	2116	671	443	433	1701	1606		2363	2293	1905	603	388	391	1580	1407
		3653	3372	3218	1026	2249	2292		3229	3025	2706	812	2004	1991		2939	2761	2320	726	1723	1760		2685	2521	2121	672	434	432	1678	1627		2325	2279	1884	616	405	382	1554	1416
		3674	3384	3275	1006	2280	2247		3278	3075	2607	800	2033	1965		2924	2785	2338	723	1712	1786		2730	2482	2105	663	446	408	1695	1610		2329	2313	1895	614	380	396	1554	1417
		3693	3402	3230	1034	2215	2267		3284	2987	2661	808	1979	1959		2936	2782	2359	717	1753	1730		2725	2439	2111	659	439	428	1654	1624		2364	2270	1835	613	391	386	1523	1441
		3717	3338	3197	1035	2184	2245		3297	3044	2677	799	2010	1987		2926	2784	2305	723	1697	1705		2710	2478	2092	666	447	425	1641	1607		2357	2307	1878	605	384	380	1547	1420
		3657	3409	3204	1024	2219	2315		3345	3076	2621	820	1993	1994		2884	2768	2254	720	1764	1711		2688	2498	2091	641	435	423	1634	1598		2378	2300	1861	599	387	391	1526	1425
		3729	3323	3219	1050	2203	2296		3308	3048	2662	792	1974	1954		2994	2758	2291	712	1711	1736		2699	2431	2116	643	429	421	1642	1601		2333	2282	1824	601	372	391	1564	1421
		3782	3372	3296	1030	2225	2273		3216	3033	2653	811	1995	1961		2854	2760	2276	707	1690	1737		2695	2462	2083	660	447	423	1626	1625		2355	2192	1806	591	366	378	1541	1410
		3723	3348	3189	1025	2202	2281		3253	3000	2604	815	1991	1991		2899	2718	2298	705	1716	1725		2760	2469	2081	646	432	417	1658	1594		2353	2301	1858	597	383	391	1504	1412
		3774	3383	3167	1030	2209	2208		3264	2988	2587	788	1982	1975		2836	2764	2273	719	1703	1696		2744	2493	2072	648	438	419	1635	1615		2367	2262	1860	580	377	383	1534	1385
		3679	3347	3208	1044	2249	2262		3283	2992	2592	804	1960	1951		2888	2717	2273	703	1684	1705		2665	2455	2123	648	423	417	1632	1563		2308	2247	1831	596	386	389	1515	1384
		3705	3371	3150	1028	2260	2264		3365	2979	2599	810	2022	1965		2836	2719	2301	714	1728	1712		2680	2460	2113	651	436	421	1625	1587		2329	2256	1813	570	377	363	1514	1423
		3711	3405	3155	1021	2191	2268		3223	2989	2636	815	2005	1953		2900	2705	2275	695	1708	1702		2684	2440	2103	650	428	418	1621	1591		2295	2279	1856	586	373	375	1502	1374
		3710	3358	3174	1031	2246	2224		3181	2979	2615	794	1995	1961		2820	2784	2280	708	1722	1682		2707	2371	2062	653	435	412	1649	1592		2247	2279	1823	590	375	370	1521	1396
		3780	3379	3229	1014	2276	2304		3294	2984	2595	801	1984	1945		2830	2687	2276	703	1698	1690		2687	2456	2085	629	426	420	1622	1587		2255	2170	1844	582	368	375	1529	1398
		3690	3318	3197	1019	2238	2288		3262	2970	2598	796	1987	1931		2802	2657	2255	697	1703	1745		2642	2380	2033	629	423	421	1656	1569		2338	2146	1841	583	383	369	1528	1385
		3763	3369	3199	1006	2264	2253		3251	2979	2602	785	1971	1976		2840	2701	2247	691	1696	1733		2629	2445	2074	632	424	426	1619	1585		2282	2245	1818	565	373	363	1496	1378
		3708	3331	3241	1032	2222	2245		3178	3007	2582	801	2010	1899		2903	2713	2231	691	1683	1706		2662	2397	2078	638	426	417	1621	1557		2266	2236	1854	578	370	381	1477	1393
		3717	3393	3209	1031	2221	2267		3232	3052	2584	792	1971	1963		2826	2717	2222	709	1690	1676		2674	2371	2006	650	418	411	1615	1589		2295	2187	1783	571	362	359	1488	1381
		3644	3324	3197	1016	2251	2283		3179	2978	2550	803	1982	1942		2867	2679	2266	696	1664	1760		2615	2344	2068	655	421	413	1629	1563		2249	2150	1837	584	370	374	1497	1377
		3671	3357	3159	1034	2211	2267		3197	3009	2607	796	1983	1934		2792	2706	2253	690	1689	1678		2634	2415	2032	637	418	409	1634	1608		2298	2206	1787	570	362	365	1518	1379
		3693	3319	3198	1017	2226	2265		3221	2974	2585	789	1995	1955		2811	2684	2246	701	1691	1691		2661	2371	2014	622	416	410	1597	1573		2221	2111	1790	572	358	369	1495	1331
		3654	3333	3159	1041	2263	2278		3250	2936	2559	782	1941	1947		2901	2655	2241	674	1665	1690		2580	2356	2050	642	412	415	1612	1573		2246	2205	1803	570	369	373	1498	1339
		3715	3353	3196	1017	2199	2237		3209	2948	2580	787	1998	1926		2835	2678	2265	681	1716	1679		2620	2327	2055	622	415	410	1601	1556		2232	2157	1793	572	371	379	1461	1356
		3667	3319	3170	1003	2189	2219		3219	2953	2549	782	1993	1942		2803	2637	2237	684	1665	1669		2585	2324	2033	626	412	415	1590	1565		2386	2110	1776	564	358	374	1506	1317
		3613	3341	3202	1032	2277	2287		3178	2925	2569	789	1950	1921		2841	2673	2243	702	1662	1678		2559	2330	2041	635	415	400	1592	1582		2257	2094	1782	566	353	371	1483	1367
		3710	3409	3178	1030	2203	2253		3235	2912	2546	800	1961	1924		2814	2598	2208	693	1686	1690		2586	2372	1975	614	420	410	1607	1565		2276	2131	1738	566	369	366	1488	1359
		3655	3315	3194	1029	2226	2300		3215	2914	2546	780	1952	1929		2864	2666	2234	696	1687	1649		2573	2353	2021	611	423	403	1602	1544		2188	2163	1780	557	357	370	1472	1329
		3678	3283	3142	1011	2279	2274		3258	2915	2534	778	1992	1917		2795	2606	2165	672	1668	1719		2530	2326	2014	613	409	409	1582	1551		2286	2206	1753	564	366	360	1486	1369
		3604	3323	3189	1021	2185	2259		3178	2893	2547	779	1935	1954		2836	2582	2235	667	1650	1704		2567	2276	1976	621	409	410	1579	1548		2236	2115	1742	563	354	358	1484	1390
		3660	3339	3158	1019	2229	2258		3223	2938	2556	777	1927	1907		2805	2589	2225	677	1637	1659		2574	2312	2016	609	402	409	1615	1560		2201	2144	1765	547	361	360	1458	1346
		3640	3291	3162	1036	2227	2236		3204	2918	2538	784	1966	1902		2786	2616	2149	670	1659	1658		2537	2344	1985	615	414	412	1589	1547		2176	2215	1751	566	359	358	1506	1356
		3675	3330	3254	1026	2245	2273		3134	2901	2544	786	1981	1896		2775	2610	2224	690	1639	1654		2546	2319	2015	627	403	397	1586	1530		2167	2054	1739	561	362	355	1463	1331
		3644	3331	3170	1035	2172	2235		3130	2940	2566	776	2010	1951		2787	2645	2203	682	1640	1627		2536	2307	2013	615	405	407	1565	1514		2235	2190	1755	570	348	357	1459	1336
		3620	3330	3157	1034	2189	2254		3254	2896	2549	781	1957	1871		2808	2587	2190	673	1646	1700		2591	2275	2002	607	404	403	1596	1531		2184	2203	1738	562	367	351	1489	1309
		3664	3325	3140	1023	2195	2238		3275	2924	2559	794	1940	1930		2761	2572	2192	675	1684	1647		2560	2326	2007	628	405	405	1572	1522		2222	2152	1758	550	345	358	1453	1340
		3625	3320	3172	1035	2212	2216		3134	2930	2550	776	1967	1884		2801	2588	2206	664	1644	1660		2589	2265	1998	632	394	391	1577	1497		2205	2008	1733	555	354	340	1437	1293
		3595	3337	3156	1008	2226	2221		3188	2915	2507	788	1947	1985		2799	2593	2187	665	1640	1643		2575	2299	1973	617	403	410	1582	1522		2172	2038	1726	555	347	346	1438	1319
		3649	3302	3182	1014	2197	2273		3250	2852	2498	782	1943	1886		2806	2558	2167	678	1635	1654		2581	2312	1966	613	404	398	1560	1504		2241	2119	1711	560	355	351	1433	1317
		3743	3316	3166	1023	2215	2276		3208	2886	2483	769	1952	1889		2735	2546	2138	671	1611	1653		2588	2250	1952	618	398	404	1535	1535		2190	2056	1728	553	342	356	1441	1310
		3642	3318	3087	1021	2246	2292		3193	2889	2552	760	1956	1907		2780	2624	2156	679	1636	1630		2568	2303	2005	605	400	403	1549	1513		2259	2062	1712	538	352	345	1422	1311
		3678	3350	3100	1013	2193	2251		3166	2895	2543	750	1973	1893		2781	2565	2149	661	1646	1632		2501	2283	1999	612	402	402	1556	1505		2184	2087	1717	550	345	345	1433	1316
		3603	3326	3135	1036	2266	2270		3107	2866	2526	748	1938	1930		2754	2573	2137	669	1648	1670		2499	2258	1950	599	402	402	1555	1551		2288	2057	1702	536	364	351	1416	1309
		3611	3325	3066	1018	2239	2251		3172	2861	2495	763	1932	1960		2717	2527	2168	670	1642	1633		2475	2253	1961	595	388	405	1571	1489		2177	2114	1736	529	343	346	1429	1295
		3641	3304	3136	1013	2191	2253		3227	2925	2545	758	1963	1916		2715	2563	2151	665	1628	1637		2472	2238	1933	598	404	391	1541	1518		2255	2113	1706	538	341	341	1418	1297
		3640	3283	3146	1018	2229	2220		3122	2909	2523	774	1954	1917		2730	2624	2147	672	1613	1654		2475	2271	1992	621	401	387	1550	1485		2226	2096	1712	545	358	337	1386	1279
		3608	3345	3203	1044	2188	2253		3175	2844	2523	747	1952	1885		2743	2550	2173	658	1624	1617		2534	2278	1941	598	395	390	1528	1506		2153	2027	1686	531	351	353	1401	1287
		3560	3299	3097	1024	2203	2237		3209	2852	2474	753	1937	1882		2740	2564	2143	672	1635	1641		2506	2239	1931	620	397	398	1540	1519		2168	2084	1708	545	344	345	1370	1297
		3669	3280	3123	1015	2261	2239		3107	2894	2493	745	1947	1835		2766	2549	2118	660	1630	1681		2525	2244	1943	609	407	403	1572	1523		2150	2102	1702	546	340	346	1389	1309
		3685	3313	3114	1008	2162	2205		3183	2861	2468	762	1937	1944		2798	2551	2115	663	1604	1635		2466	2239	1965	600	394	397	1537	1487		2141	2018	1682	536	348	354	1407	1320
		3634	3271	3092	1021	2186	2212		3123	2877	2510	764	1932	1885		2717	2534	2120	659	1605	1620		2524	2204	1954	604	390	393	1513	1478		2192	2090	1679	533	350	340	1384	1294
		3603	3297	3148	1017	2198	2207		3158	2872	2521	765	1937	1874		2694	2538	2159	672	1584	1635		2478	2251	1943	600	396	400	1531	1521		2119	2037	1717	552	342	350	1384	1293
		3709	3267	3149	1007	2181	2229		3134	2838	2502	759	1918	1888		2693	2523	2131	654	1606	1622		2542	2200	1958	602	387	396	1512	1501		2125	1997	1673	530	335	337	1392	1278
		3586	3339	3122	1003	2150	2214		3138	2873	2474	769	1911	1879		2723	2557	2159	653	1580	1606		2464	2236	1943	592	392	389	1521	1499		2116	2069	1699	534	332	340	1395	1299
		3557	3346	3168	999	2186	2225		3125	2863	2476	754	1905	1870		2718	2575	2155	663	1575	1620		2452	2222	1924	596	399	405	1508	1506		2125	1979	1667	528	345	345	1381	1284
		3608	3276	3148	1014	2162	2277		3153	2861	2470	757	1897	1928		2769	2527	2117	659	1589	1624		2432	2254	1888	594	394	393	1509	1475		2128	2007	1682	531	343	357	1380	1278
		3585	3269	3102	1001	2196	2221		3114	2853	2492	742	1930	1881		2715	2514	2103	660	1604	1616		2473	2219	1962	588	395	385	1497	1475		2103	1954	1672	531	331	346	1361	1289
		3598	3247	3145	1013	2191	2271		3073	2834	2475	759	1890	1898		2740	2525	2115	663	1596	1602		2443	2190	1932	587	402	391	1503	1518		2106	1995	1695	532	346	330	1380	1300
		3584	3342	3194	1005	2139	2197		3096	2892	2484	756	1910	1881		2656	2544	2084	644	1588	1615		2483	2189	1915	587	391	394	1530	1499		2077	1985	1645	523	346	337	1378	1275
		3592	3283	3139	1026	2220	2226		3137	2833	2485	760	1901	1909		2686	2514	2133	659	1579	1600		2416	2219	1931	587	398	378	1494	1513		2101	2005	1665	526	340	339	1360	1268
		3528	3298	3119	993	2184	2197		3113	2848	2501	753	1912	1930		2660	2503	2163	645	1575	1628		2425	2216	1932	589	396	388	1471	1463		2086	2066	1661	530	337	351	1368	1262
		3587	3360	3093	1004	2193	2202		3142	2857	2480	747	1889	1873		2714	2538	2122	654	1577	1610		2474	2253	1907	587	396	386	1497	1470		2111	1997	1668	521	335	335	1365	1287
		3558	3309	3171	1018	2151	2240		3037	2852	2475	751	1883	1882		2612	2543	2161	654	1575	1588		2415	2200	1940	597	402	372	1523	1440		2088	1954	1662	529	330	338	1362	1274
		3589	3336	3134	1022	2137	2246		3018	2849	2503	753	1899	1903		2635	2487	2100	650	1568	1612		2388	2208	1920	566	389	392	1496	1456		2091	1961	1664	521	335	340	1388	1305
		3535	3338	3109	1014	2193	2170		3054	2854	2490	750	1884	1890		2655	2479	2113	651	1599	1587		2373	2179	1895	579	385	382	1495	1469		2047	1998	1661	526	333	335	1366	1282
		3615	3300	3130	1027	2200	2193		3032	2850	2487	755	1880	1837		2655	2515	2119	645	1580	1605		2388	2143	1919	585	383	383	1501	1471		2052	2003	1647	531	333	334	1359	1261
		3553	3299	3091	1021	2193	2257		3044	2857	2509	738	1887	1864		2649	2494	2081	636	1563	1580		2332	2196	1894	580	395	378	1495	1504		2054	1953	1612	533	337	324	1336	1263
		3590	3217	3088	1032	2151	2194		2986	2823	2486	753	1879	1867		2628	2512	2093	665	1563	1613		2381	2145	1944	586	393	379	1474	1463		2064	2016	1636	512	326	330	1372	1292
		3555	3337	3152	1034	2157	2197		3049	2818	2464	732	1891	1856		2592	2495	2105	655	1557	1618		2354	2193	1918	579	390	385	1473	1449		2081	1965	1634	511	335	334	1361	1266
		3573	3261	3084	1016	2170	2230		3018	2842	2465	744	1868	1868		2609	2484	2079	660	1541	1673		2346	2153	1879	582	387	379	1467	1466		2044	2018	1629	524	324	335	1350	1250
		3523	3280	3082	1010	2187	2195		2993	2814	2445	735	1881	1863		2695	2497	2065	633	1578	1586		2370	2196	1897	578	402	373	1473	1502		2078	1929	1639	539	321	331	1352	1252
		3550	3288	3112	1009	2139	2206		3120	2842	2464	731	1901	1873		2576	2487	2114	629	1536	1596		2383	2160	1886	572	381	373	1464	1452		2048	1951	1620	528	326	322	1364	1241
		3564	3267	3128	1009	2141	2200		3011	2837	2450	753	1848	1873		2620	2453	2028	639	1563	1594		2323	2152	1888	586	390	376	1502	1453		2030	2004	1606	522	334	332	1359	1281
		3498	3308	3082	1001	2164	2232		3010	2839	2430	750	1877	1851		2641	2476	2076	646	1535	1587		2346	2148	1916	580	381	379	1468	1467		2036	1942	1630	510	332	318	1360	1250
		3579	3288	3061	1013	2188	2228		3012	2820	2482	751	1885	1870		2597	2468	2058	639	1548	1576		2387	2132	1934	579	379	376	1467	1457		2086	1947	1658	521	328	322	1341	1227
		3570	3269	3065	1020	2161	2241		3044	2799	2487	727	1876	1872		2578	2495	2080	654	1535	1590		2393	2160	1903	578	381	385	1483	1448		2026	1938	1650	511	327	326	1355	1236
		3562	3263	3073	1004	2216	2164		3061	2805	2439	753	1876	1852		2615	2435	2056	643	1523	1596		2320	2181	1895	570	382	378	1463	1490		2026	1920	1655	517	328	327	1364	1207
		3477	3276	3147	1007	2193	2211		3084	2765	2470	735	1885	1856		2577	2485	2091	623	1554	1594		2324	2133	1868	583	382	379	1458	1451		2039	1986	1618	508	326	320	1327	1228
		3528	3318	3094	1017	2184	2250		2936	2796	2456	747	1904	1852		2580	2462	2064	645	1545	1578		2319	2152	1875	584	387	376	1477	1434		2042	1971	1631	524	323	322	1344	1226
		3495	3227	3100	1032	2135	2196		3054	2802	2469	735	1869	1850		2606	2459	2029	644	1548	1601		2333	2143	1912	596	387	372	1488	1475		2092	1975	1607	515	320	317	1327	1219
		3575	3306	3105	1014	2172	2178		3033	2784	2475	741	1866	1844		2593	2473	2045	639	1538	1567		2334	2165	1876	573	389	382	1472	1443		2099	1972	1590	509	324	320	1349	1242
		3577	3337	3101	1012	2206	2223		3011	2782	2463	752	1870	1846		2598	2462	2075	640	1552	1542		2388	2151	1876	579	380	372	1466	1431		2014	2008	1599	527	325	324	1332	1240
		3493	3277	3121	1012	2169	2185		3050	2784	2428	724	1888	1830		2590	2482	2056	634	1533	1558		2392	2135	1849	586	378	370	1467	1443		2022	1966	1593	518	328	312	1318	1231
		3553	3237	3128	1012	2195	2199		3065	2817	2470	735	1859	1826		2560	2465	2076	648	1547	1630		2308	2136	1883	576	390	373	1454	1429		2025	2007	1663	509	319	325	1331	1229
		3518	3280	3070	1004	2181	2246		3047	2780	2435	732	1849	1842		2597	2443	2078	641	1564	1583		2335	2158	1844	563	384	379	1471	1449		2029	1867	1593	497	320	319	1322	1216
		3514	3250	3110	999	2191	2237		3028	2768	2449	730	1899	1879		2588	2471	2029	623	1539	1556		2302	2161	1899	564	372	373	1442	1430		2013	1936	1585	514	323	317	1316	1215
		3537	3278	3089	998	2176	2260		3011	2807	2417	739	1848	1845		2571	2485	2030	622	1545	1557		2300	2140	1854	558	380	367	1470	1417		2011	1975	1612	513	328	318	1340	1231
		3563	3277	3065	1013	2138	2158		2970	2808	2389	734	1834	1869		2565	2451	2057	649	1540	1570		2362	2137	1867	579	378	370	1438	1406		2007	1925	1600	516	315	321	1331	1233
		3543	3336	3090	996	2190	2151		2934	2791	2413	747	1835	1850		2565	2428	2079	638	1543	1573		2304	2108	1881	559	367	372	1469	1426		2058	1905	1589	511	320	309	1300	1234
		3546	3316	3073	994	2176	2207		3031	2793	2421	720	1866	1846		2548	2460	2058	642	1531	1538		2280	2094	1858	565	375	368	1420	1420		2003	1937	1608	506	314	325	1315	1246
		3499	3251	3140	1023	2146	2183		3056	2787	2401	723	1841	1861		2529	2437	2021	646	1526	1559		2300	2110	1851	557	375	370	1459	1461		2034	1922	1602	506	316	323	1325	1217
		3610	3263	3113	1003	2153	2153		2993	2769	2406	736	1867	1852		2542	2442	2018	642	1510	1552		2320	2090	1847	571	377	366	1444	1413		2022	1957	1604	505	316	315	1322	1214
		3472	3259	3048	981	2138	2207		3056	2776	2427	749	1860	1840		2538	2423	2027	644	1520	1583		2265	2120	1851	565	382	364	1457	1464		1954	1945	1592	509	317	319	1303	1233
		3505	3294	3069	1017	2184	2208		2995	2797	2426	732	1842	1823		2550	2470	2032	631	1512	1534		2256	2109	1870	573	368	366	1444	1418		1983	1902	1577	502	308	319	1287	1210
		3514	3282	3143	1006	2184	2251		3005	2749	2419	723	1862	1845		2508	2417	2078	623	1510	1548		2314	2098	1848	565	364	378	1431	1406		2022	1966	1584	507	317	306	1304	1196
		3549	3308	3081	1012	2188	2196		2954	2768	2423	728	1874	1821		2507	2477	2060	644	1503	1563		2268	2090	1877	563	368	360	1428	1420		1999	1898	1606	489	320	306	1306	1201
		3490	3237	3052	992	2178	2191		2950	2800	2420	724	1861	1807		2558	2472	2038	634	1500	1547		2265	2039	1806	555	369	356	1449	1418		2010	1957	1576	513	320	310	1286	1209
		3524	3314	3120	1002	2166	2175		3019	2755	2390	726	1877	1838		2565	2433	2065	625	1531	1580		2277	2082	1846	564	377	364	1449	1414		1985	1953	1599	495	313	317	1305	1216
		3423	3285	3079	1013	2149	2187		2923	2763	2422	724	1869	1825		2498	2405	2011	647	1521	1537		2295	2105	1867	566	374	365	1447	1421		1999	1961	1583	498	308	312	1292	1213
		3478	3268	3056	1004	2171	2190		2975	2738	2432	718	1856	1828		2555	2390	2058	619	1512	1563		2331	2103	1833	562	370	371	1401	1408		1957	1946	1557	505	310	306	1268	1182
		3480	3254	3093	1000	2154	2169		2930	2774	2384	740	1850	1822		2507	2418	2018	629	1524	1543		2294	2095	1826	561	366	368	1436	1420		1985	1894	1562	515	317	309	1309	1207
		3438	3241	3136	991	2164	2170		2974	2745	2402	730	1857	1829		2552	2443	2017	644	1497	1567		2263	2084	1857	568	376	369	1422	1404		2000	1859	1558	510	307	313	1330	1221
		3444	3269	3124	1014	2156	2209		2995	2730	2451	727	1839	1837		2539	2446	2018	624	1500	1541		2296	2066	1834	556	378	365	1435	1418		1978	1910	1586	508	302	300	1325	1198
		3537	3224	3075	1007	2162	2168		2988	2742	2382	743	1844	1843		2514	2445	2005	620	1506	1533		2197	2051	1858	556	370	366	1413	1387		1961	1950	1550	507	306	307	1290	1215
		3456	3268	3093	1001	2203	2158		2975	2771	2435	719	1833	1810		2506	2398	2032	624	1513	1505		2225	2056	1816	560	368	370	1436	1414		1942	1904	1550	494	308	312	1296	1209
		3482	3275	3081	1031	2161	2155		2981	2729	2409	729	1849	1808		2477	2411	2062	630	1513	1557		2240	2053	1804	568	368	367	1442	1426		1970	1872	1535	500	308	311	1286	1216
		3497	3308	3118	1022	2126	2195		2964	2757	2379	740	1865	1812		2527	2392	2028	622	1511	1528		2245	2087	1812	557	371	368	1416	1384		1953	1852	1563	498	299	303	1303	1221
		3530	3269	3095	1021	2211	2176		2856	2735	2440	721	1863	1824		2470	2404	2015	636	1526	1545		2257	2057	1821	552	374	355	1401	1396		2005	1908	1551	489	310	309	1287	1188
		3426	3245	3036	1000	2182	2232		2957	2748	2362	726	1855	1787		2482	2403	2011	635	1495	1533		2208	2094	1830	549	363	357	1431	1403		1942	1878	1568	499	309	305	1304	1208
		3478	3261	3055	1000	2161	2177		2916	2727	2419	736	1788	1804		2515	2403	2020	614	1504	1541		2260	2076	1836	559	369	372	1446	1399		1936	1885	1544	488	311	313	1292	1198
		3451	3287	3068	999	2172	2207		2948	2804	2402	728	1836	1775		2563	2449	2048	634	1532	1545		2289	2082	1814	544	367	361	1413	1406		1941	1896	1547	495	306	312	1306	1183
		3481	3269	3094	1003	2122	2163		2944	2727	2372	715	1864	1807		2489	2385	2011	640	1502	1533		2221	2034	1826	561	369	357	1431	1409		1929	1934	1568	487	304	307	1282	1191
		3469	3270	3114	1019	2176	2147		3039	2720	2376	725	1882	1805		2441	2394	2029	628	1505	1541		2231	2058	1839	551	360	349	1421	1385		1905	1914	1575	501	303	306	1256	1175
		3441	3241	3086	1018	2155	2206		2929	2760	2368	739	1816	1817		2505	2445	2009	607	1476	1528		2244	2066	1818	543	359	364	1407	1375		1899	1920	1547	497	310	295	1276	1220
		3460	3240	3050	1033	2166	2199		2961	2685	2365	731	1871	1818		2489	2397	1971	621	1515	1532		2205	2028	1813	533	361	363	1431	1377		1951	1913	1579	486	296	299	1277	1158
		3514	3257	3095	992	2155	2145		2927	2731	2408	719	1833	1838		2529	2393	1997	621	1505	1526		2240	2038	1836	553	368	351	1412	1389		1913	1926	1567	482	300	306	1291	1186
		3520	3240	3076	991	2130	2166		2931	2690	2431	740	1827	1805		2555	2412	1999	615	1526	1522		2237	2078	1842	543	366	352	1425	1376		1939	1947	1550	483	299	300	1247	1173
		3492	3208	3090	995	2162	2200		2947	2724	2410	722	1847	1774		2485	2344	1992	626	1462	1513		2195	2057	1800	554	362	356	1429	1382		1890	1890	1551	510	296	308	1248	1154
		3468	3238	3042	1007	2138	2185		2919	2765	2406	720	1830	1801		2480	2411	2010	613	1511	1538		2226	2052	1805	544	363	355	1363	1368		1884	1896	1512	489	297	297	1269	1188
		3521	3235	3082	994	2147	2222		3004	2719	2368	715	1843	1814		2479	2384	1979	633	1516	1527		2213	2084	1806	547	363	346	1425	1391		1944	1892	1562	484	302	296	1262	1184
		3500	3260	3072	992	2166	2192		2893	2765	2433	712	1830	1797		2496	2381	2046	628	1502	1494		2246	2028	1836	562	365	354	1400	1393		1940	1909	1564	484	293	300	1271	1191
		3531	3284	3084	997	2169	2215		2898	2760	2402	715	1818	1833		2504	2380	2049	609	1500	1532		2276	2033	1817	541	360	353	1391	1400		1905	1852	1528	501	300	305	1248	1178
		3456	3220	3081	1015	2140	2139		2894	2731	2378	719	1827	1795		2504	2406	1982	615	1494	1502		2217	2055	1813	555	369	351	1414	1365		1933	1890	1514	505	293	303	1279	1141
		3467	3216	3082	1011	2134	2150		2920	2687	2374	726	1850	1772		2466	2382	1994	598	1481	1487		2196	2056	1758	540	362	353	1384	1390		1892	1839	1530	484	297	300	1282	1178
		3470	3259	3103	997	2153	2189		2952	2743	2403	719	1836	1805		2513	2411	1993	608	1492	1493		2205	2025	1791	540	367	361	1416	1386		1881	1893	1529	495	296	300	1251	1196
		3430	3248	3012	985	2167	2127		2924	2738	2365	722	1812	1835		2455	2352	1991	619	1477	1521		2224	2050	1815	549	349	358	1393	1381		1888	1875	1522	491	294	306	1272	1152
		3489	3274	3032	1009	2156	2209		2928	2739	2359	698	1824	1795		2493	2354	1966	619	1483	1520		2247	2046	1791	547	356	366	1398	1367		1888	1826	1505	479	309	297	1232	1165
		3558	3221	3026	1005	2191	2157		2927	2711	2401	725	1840	1841		2486	2329	1948	593	1458	1508		2224	2015	1778	543	358	354	1383	1381		1933	1855	1528	485	298	294	1240	1148
		3437	3212	3031	1011	2163	2222		2898	2732	2369	705	1810	1765		2520	2344	1981	623	1489	1487		2197	2028	1792	546	354	358	1385	1381		1915	1820	1516	480	291	300	1276	1140
		3480	3257	3084	1009	2167	2158		2956	2775	2372	737	1805	1775		2423	2379	2002	612	1495	1492		2179	2029	1746	551	362	352	1371	1368		1869	1826	1505	483	300	295	1259	1173
		3450	3182	3051	1002	2148	2138		2873	2727	2341	715	1798	1768		2472	2369	1983	619	1463	1529		2171	2004	1805	556	358	348	1373	1369		1891	1862	1526	479	301	286	1248	1178
		3531	3218	2986	988	2229	2140		2911	2738	2331	721	1817	1816		2439	2388	1991	617	1478	1497		2160	2014	1818	545	362	359	1395	1387		1902	1884	1518	479	301	300	1240	1163
		3706	3025	4002	863	2752	2460		970	868	531	76	477	196		1418	1241	1125	142	770	472		1923	1393	1643	251	174	157	1002	626		1582	1426	1699	270	183	193	1112	783
		3667	3009	4090	883	2755	2473		841	777	455	74	408	170		1356	1143	1047	135	702	421		1840	1358	1638	238	167	139	970	581		1569	1428	1627	263	181	186	1083	754
		3663	3048	4051	857	2781	2404		790	679	409	58	347	151		1300	1093	954	126	642	390		1818	1334	1591	229	160	133	890	558		1528	1333	1615	246	167	176	1028	734
		3764	2987	4008	866	2782	2435		710	586	358	57	313	135		1222	1030	906	114	570	351		1760	1314	1545	217	157	133	863	535		1520	1332	1587	239	165	170	989	701
		3661	3072	4026	858	2753	2457		646	541	330	54	271	130		1187	962	821	108	546	318		1713	1257	1495	203	149	121	807	504		1510	1338	1554	224	158	165	970	693
		3726	3050	4017	864	2801	2474		588	478	294	51	249	120		1140	901	784	93	486	293		1672	1230	1439	186	143	122	783	463		1480	1319	1523	216	158	170	968	665
		3593	3049	4045	859	2803	2485		549	437	270	52	226	105		1088	857	744	94	458	260		1584	1194	1385	186	134	110	757	436		1431	1276	1507	215	153	157	918	632
		3672	3047	4022	856	2769	2428		500	406	249	46	206	99		1028	807	680	84	422	253		1554	1156	1356	176	131	110	723	400		1422	1267	1460	202	150	153	872	610
		3691	3057	4111	865	2782	2429		472	376	236	46	189	99		989	782	638	80	384	222		1530	1144	1315	167	123	102	677	391		1404	1266	1416	198	148	145	855	592
		3785	3053	4078	863	2703	2460		435	337	214	44	177	91		945	729	615	75	343	212		1507	1084	1286	160	116	101	664	373		1337	1205	1402	196	140	142	851	570
		3734	3044	4032	859	2754	2450		413	314	198	42	162	87		891	697	560	70	328	199		1479	1059	1202	156	113	100	648	350		1358	1203	1333	186	136	134	831	562
		3682	3060	3975	848	2757	2432		380	293	183	41	153	83		888	676	533	68	297	172		1464	1068	1175	153	110	92	613	335		1340	1134	1278	178	134	137	815	551
		3737	3081	4053	859	2739	2459		362	266	160	39	143	78		834	620	500	63	288	169		1399	1003	1139	147	106	94	579	328		1335	1132	1239	179	131	127	777	545
		3700	3055	3965	848	2667	2455		330	256	153	35	135	74		818	593	475	59	272	154		1373	985	1100	147	110	88	570	316		1296	1131	1223	177	125	130	777	525
		3701	3061	3969	851	2701	2478		317	238	143	38	130	73		803	582	439	60	245	137		1342	983	1036	133	104	82	546	297		1281	1108	1179	168	124	126	748	524
		3668	3030	4005	838	2743	2442		307	226	133	37	120	68		760	548	424	55	232	141		1317	936	1029	138	99	81	521	273		1253	1080	1140	166	119	124	729	519
		3697	3062	3983	849	2719	2446		289	204	136	37	115	71		711	531	400	50	218	128		1249	925	979	121	98	81	503	270		1251	1079	1113	157	119	120	731	480
		3624	3015	4033	847	2717	2448		273	197	126	39	107	66		689	496	381	47	211	119		1241	907	966	123	90	79	486	256		1234	1077	1093	157	116	114	709	490
		3628	3020	3971	839	2661	2444		255	185	114	34	103	65		679	469	362	43	199	115		1239	874	943	117	89	75	471	241		1179	998	1094	151	114	114	699	469
		3577	3007	3969	830	2677	2494		246	169	105	32	97	64		665	469	340	46	187	108		1194	849	933	113	89	73	473	236		1265	984	1072	149	113	110	667	453
		3701	2998	3931	850	2725	2429		231	168	104	33	97	63		637	441	340	41	174	108		1169	830	916	119	86	69	435	226		1165	1006	1032	151	108	103	677	442
		3779	3063	4018	832	2677	2486		233	155	102	31	97	61		608	425	323	40	166	98		1152	827	900	110	85	68	428	217		1155	961	1026	148	110	107	651	443
		3703	2999	3994	829	2675	2429		213	147	90	32	93	61		608	409	312	39	155	98		1112	812	885	107	79	61	416	208		1170	986	1003	147	101	108	650	431
		3579	2981	4009	833	2673	2436		207	140	97	31	90	63		559	391	291	38	152	85		1100	810	843	102	79	64	406	206		1124	975	976	140	103	102	634	429
		3629	2990	3965	839	2702	2440		195	138	93	33	88	61		544	383	280	38	143	86		1074	780	851	101	76	64	391	188		1101	919	995	141	104	104	633	422
		3611	3009	3992	835	2693	2439		191	131	90	33	85	57		536	370	264	35	137	86		1063	762	814	97	77	61	386	189		1092	926	943	140	98	100	613	406
		3639	2995	4002	845	2699	2442		191	124	89	32	80	52		505	357	252	35	132	78		1042	750	794	96	73	60	376	180		1077	905	936	132	98	97	610	397
		3614	2962	4020	826	2702	2450		182	122	83	30	79	56		508	334	244	35	124	72		1031	728	774	90	74	56	369	176		1071	913	929	131	96	99	600	391
		3667	2941	3987	855	2689	2423		176	114	80	29	81	53		495	324	232	31	117	74		1001	734	769	92	68	54	355	168		1043	860	904	133	97	96	599	384
		3628	3003	3973	831	2667	2442		162	106	76	30	74	55		474	321	223	32	117	67		983	701	747	89	69	53	347	163		1046	849	912	130	96	91	603	380
		3615	3002	3923	831	2660	2435		160	108	78	32	75	53		458	315	217	28	111	69		966	691	750	85	65	52	321	160		1038	857	878	122	93	92	588	381
		3635	3011	3976	852	2637	2454		156	103	74	28	72	55		451	310	209	30	102	63		963	684	711	83	64	52	332	154		1037	844	870	122	91	91	567	365
		3610	3012	3939	817	2684	2353		145	97	77	29	69	52		428	288	202	30	102	59		921	674	693	77	63	51	314	145		1014	833	873	120	93	94	570	361
		3585	3044	3932	812	2651	2422		150	94	73	26	72	52		433	286	189	28	99	58		907	678	669	79	61	49	312	150		1001	820	851	121	87	89	560	355
		3633	2996	3972	833	2702	2421		139	95	79	29	68	55		422	274	188	25	95	59		890	669	674	77	61	46	297	145		984	836	823	115	92	89	549	352
		3645	2999	3856	830	2680	2442		149	85	68	28	67	54		405	272	179	25	94	55		911	658	656	77	58	44	295	136		985	808	835	115	84	90	551	337
		3619	2996	3917	830	2728	2420		138	86	67	30	66	50		399	260	171	22	89	53		876	639	643	75	60	47	293	132		980	799	823	117	91	85	537	329
		3605	3002	3957	844	2674	2386		141	85	67	27	66	50		376	250	162	24	82	52		882	624	636	72	58	46	278	128		971	765	814	114	87	87	534	332
		3643	2991	3887	827	2650	2425		136	84	68	28	68	49		372	241	163	25	83	49		849	629	626	72	55	42	277	122		946	786	804	110	83	83	515	323
		3610	2970	3905	825	2693	2413		130	83	67	26	63	49		365	231	152	24	80	49		875	607	627	65	53	44	266	124		962	770	786	109	84	83	513	320
		3757	2989	3985	821	2682	2389		126	76	62	29	61	50		352	228	151	24	73	50		850	608	603	68	52	40	250	112		925	771	773	111	88	82	494	308
		3615	2999	3895	834	2697	2400		124	80	68	26	60	52		344	221	150	24	69	46		817	598	595	63	52	42	242	116		944	759	765	107	81	77	484	314
		3635	2996	3925	822	2711	2403		124	74	62	27	61	52		333	216	145	24	69	44		812	581	589	64	50	41	226	113		935	731	756	102	79	79	491	305
		3563	2989	3900	835	2689	2417		120	74	64	29	57	47		335	210	138	22	64	44		792	585	558	62	50	41	227	108		932	734	743	102	78	80	476	299
		3650	2956	3924	835	2667	2435		117	75	62	26	56	47		324	206	135	21	58	44		789	566	545	60	48	36	231	104		913	732	754	99	81	77	460	299
		3668	2968	3860	818	2646	2404		114	74	61	26	58	51		307	201	136	20	58	42		773	545	552	61	52	38	213	100		906	726	741	107	82	78	458	290
		3607	2960	3870	807	2635	2407		105	71	62	27	56	49		307	201	131	20	57	41		802	542	527	58	48	38	211	99		896	729	710	100	77	74	445	285
		3599	3021	3888	826	2673	2450		111	66	62	30	55	45		291	199	123	20	58	41		740	555	534	58	46	36	192	96		930	704	722	99	73	74	435	287
		3649	3007	3956	819	2681	2406		104	71	60	27	55	48		288	192	118	18	52	37		746	545	520	57	45	39	201	101		897	692	703	96	76	77	435	273
		3642	3031	3849	819	2640	2470		108	62	61	25	56	47		282	182	114	20	50	37		744	526	510	52	47	36	186	94		902	712	708	98	71	77	426	269
		3629	2948	3855	823	2666	2454		102	65	61	28	52	50		278	177	114	19	47	36		706	525	514	53	43	33	181	93		873	698	696	97	74	72	419	272
		3567	2934	3800	832	2627	2424		103	62	58	27	52	47		278	174	111	18	49	34		711	510	497	50	40	31	177	88		860	697	683	91	70	70	407	261
		3691	2934	3837	814	2641	2433		102	66	61	26	50	47		262	170	106	20	45	37		711	513	491	48	41	29	176	88		857	667	672	95	72	70	404	267
		3644	2971	3867	823	2618	2415		94	61	61	26	52	48		264	166	104	19	44	38		693	493	480	52	40	31	174	87		866	645	685	91	68	70	403	260
		3670	3016	3869	833	2623	2402		100	63	58	27	51	47		249	165	100	19	46	35		680	506	474	46	39	31	167	81		838	672	642	94	72	69	400	255
		3607	2981	3915	800	2640	2455		94	56	60	28	54	46		251	154	102	18	40	37		696	492	462	49	37	30	159	79		833	663	668	87	70	69	396	247

## Sheet: Figure 1B
	TMR-binding FPN WT
		experiment 1			experiment2
	FPN conc (μM)	Fluorescence polarisation (mP)
	6	385.736	386.997	379.413	375.199	381.543	382.03
	3.429	371.384	372.914	371.75	371.342	374.28	367.645
	1.959	356.553	361.596	362.703	356.137	357.328	353.68
	1.12	344.833	351.264	347.549	342.447	338.446	344.262
	0.64	334.471	332.586	334.724	328.648	328.129	327.936
	0.366	320.394	317.858	317.901	308.46	310.115	316.536
	0.209	297.302	304.033	301.021	285.564	292.812	291.291
	0.119	276.631	282.678	281.074	255.431	267.008	262.265
	0.068	249.543	254.197	252.89	234.607	231.584	237.92
	0.039	228.214	229.483	228.648	210.486	212.752	212.92
	0.022	205.917	203.89	205.932	195.163	192.781	187.055
	0.013	196.138	192.756	185.436	185.817	185.529	188.407
		parallel Fluorescence
		55250	52597	52946	52699	49672	49836
		54494	51706	53680	55058	52279	53903
		54625	53316	54147	54634	52834	53490
		55510	52550	52830	55335	52971	53136
		53976	51695	52163	53880	51382	52245
		55104	52201	52376	54428	51743	52252
		53731	51982	52223	52532	50547	50995
		53097	51048	50735	50624	48961	47831
		50216	47625	48874	47933	46371	47473
		49287	47806	46559	48414	46466	45382
		47773	46419	47205	46006	44548	45263
		45653	45113	43937	45147	44337	43712
		perpendicular Fluorescence
		24491	23246	23820	23943	22236	22284
		24979	23617	24585	25240	23803	24923
		25910	24998	25323	25939	25016	25539
		27043	25229	25579	27104	26182	25920
		26919	25891	26000	27225	25993	26441
		28362	27020	27108	28766	27247	27126
		29104	27743	28057	29194	27650	27988
		30086	28548	28472	30024	28325	27955
		30159	28320	29144	29716	28932	29225
		30971	29960	29230	31577	30163	29449
		31458	30696	31083	30981	30148	30998
		30681	30532	30191	30998	30460	29852

## Sheet: Figure 1C
	Displacement of TMR-Hep from FPN-WT
		Fluorescence polarization
		experiment 1		experiment 2		experiment 3		experiment 1		experiment 2		experiment 3		experiment 1		experiment 2
	competitor (μM)	Vamifeport						Hepcidin-25						Hepcidin-20
	20	216.74	217.35	228	221	220.333	222.925	223.971	230.762	222.599	228.323	229.138	219.804	289.315	294.988	293.006	293.523
	5	227.54	232.14	231.473	231	227.23	229.185	244.661	247.112	240.59	244.712	239.346	240.555	307.233	302.721	304.849	306.321
	1.25	233.999	235.067	233.85	232.419	238.117	232.41	256.068	259.829	257.232	259.672	255.011	250.956	308.777	298.154	300.285	305.302
	0.3125	245.709	244.842	247.128	243.447	243.933	251.131	274.74	283.375	277.274	281.797	281.702	270.269	309.837	311.868	306.846	306.845
	0.078125	274.301	273.07	269.983	265.458	288.066	281.412	296.352	296.936	295.69	298.125	296.352	287.442	304.437	310.518	309.601	306.606
	0.019531	294.62	299.932	300.611	295.312	296.313	302.33	302.335	308.491	306.462	302.37	299.998	303.115	305.512	310.483	296.387	305.708
	0.004883	302.769	304.683	306.988	307.812	305.746	309.61	308.986	309.6	299.247	301.171	302.519	296.179	305.529	306.347	297.089	301.764
	0.001221	304.812	311.085	307.844	304.717	304.032	299.679	305.117	305.471	303.452	302.862	301.412	303.891	305.14	296.52	292.644	301.561
		parallel Fluorescence
		Vamifeport						Hepcidin-25						Hepcidin-20
		48052	48341	48686	49447	44245	44937	49162	50612	49426	49779	44992	42007	51385	51086	51845	49864
		49859	50198	49911	52211	47079	47146	51636	52784	52173	52192	45761	44232	54809	53861	55291	53631
		51314	50597	50594	52392	49113	49700	53040	54635	54628	54181	50149	47784	55074	54699	54610	53612
		50876	51191	51242	53176	50513	50886	53309	55282	54963	55066	51220	48288	55431	55288	55982	54434
		52556	52334	51534	54931	54860	53736	55935	56418	56553	56018	52652	50516	55239	57286	57168	55536
		53183	53227	52505	57552	54882	56456	56606	57940	57613	57792	53972	52337	56154	56797	57065	56703
		55141	53507	53016	57940	56104	58774	56255	59558	58001	56761	54909	52201	57848	56346	57808	55392
		54975	53548	53226	57388	56610	58288	57217	56944	57492	57094	56113	53646	56786	55974	59375	56914
		perpendicular Fluorescence
		Vamifeport						Hepcidin-25						Hepcidin-20
		30933	31079	30607	31556	28268	28554	31170	31633	31428	31273	28217	26868	28324	27812	28348	27234
		31375	31283	31148	32616	29645	29565	31336	31866	31937	31670	28086	27078	29046	28829	29456	28479
		31853	31337	31416	32631	30222	30955	31414	32099	32274	31843	29769	28612	29087	29573	29387	28533
		30806	31054	30934	32354	30702	30458	30330	30869	31100	30854	28705	27740	29207	29001	29693	28872
		29930	29883	29623	31885	30322	30134	30361	30584	30741	30288	28579	27959	29455	30139	30138	29472
		28977	28665	28234	31310	29792	30244	30324	30620	30584	30957	29062	27989	29872	29884	30972	30151
		29511	28516	28111	30666	29830	30984	29697	31398	31283	30485	29403	28345	30772	29919	31327	29711
		29290	28137	28169	30582	30213	31408	30464	30295	30723	30550	30121	28640	30233	30371	32491	30541
