# Supplementary material for: Structures of ferroportin in complex with its specific inhibitor vamifeport
Source: eLife journal article supplement (doi:10.7554/elife.83053), 2023-02-28
Supplement: fig1-figsupp1-data1 [file Figure1_supplement1.xlsx]

## Sheet: Figure 1-supplA
	FPN_SEC
	volume (ml)	A280
	0	0
	0.04	0
	0.07	0.01
	0.11	-0.02
	0.15	-0.03
	0.18	-0.01
	0.22	0
	0.26	-0.02
	0.29	-0.02
	0.33	-0.01
	0.37	-0.02
	0.4	0
	0.44	-0.02
	0.48	-0.01
	0.51	-0.01
	0.55	-0.01
	0.59	-0.02
	0.62	-0.02
	0.66	-0.01
	0.7	-0.04
	0.73	0
	0.77	-0.03
	0.81	-0.02
	0.84	-0.01
	0.88	-0.03
	0.92	-0.02
	0.95	-0.02
	0.99	-0.03
	1.03	-0.03
	1.06	-0.02
	1.1	-0.02
	1.14	-0.03
	1.17	-0.02
	1.21	-0.02
	1.25	-0.03
	1.28	-0.03
	1.32	-0.02
	1.36	-0.01
	1.39	-0.03
	1.43	-0.04
	1.47	-0.02
	1.5	-0.03
	1.54	-0.02
	1.58	-0.03
	1.61	-0.03
	1.65	-0.02
	1.69	-0.02
	1.72	-0.03
	1.76	-0.03
	1.8	-0.02
	1.83	-0.03
	1.87	-0.02
	1.91	-0.02
	1.94	-0.03
	1.98	-0.03
	2.02	-0.04
	2.05	-0.03
	2.09	-0.01
	2.13	-0.03
	2.16	-0.03
	2.2	0
	2.24	-0.02
	2.27	-0.02
	2.31	-0.04
	2.35	-0.01
	2.38	-0.05
	2.42	-0.03
	2.46	-0.03
	2.49	-0.02
	2.53	-0.01
	2.57	-0.03
	2.6	-0.04
	2.64	-0.03
	2.68	-0.03
	2.71	-0.01
	2.75	-0.01
	2.79	-0.02
	2.82	-0.01
	2.86	-0.04
	2.9	-0.03
	2.93	-0.03
	2.97	-0.01
	3.01	-0.02
	3.04	-0.02
	3.08	-0.03
	3.12	-0.03
	3.15	-0.03
	3.19	-0.03
	3.23	-0.02
	3.26	-0.04
	3.3	-0.03
	3.34	-0.03
	3.37	-0.03
	3.41	-0.04
	3.45	-0.02
	3.48	-0.02
	3.52	-0.03
	3.56	-0.03
	3.59	-0.03
	3.63	-0.03
	3.67	-0.01
	3.7	-0.03
	3.74	-0.02
	3.78	-0.03
	3.81	-0.02
	3.85	-0.01
	3.89	-0.04
	3.92	-0.01
	3.96	-0.03
	4	-0.01
	4.03	-0.02
	4.07	-0.02
	4.11	-0.01
	4.14	0
	4.18	-0.04
	4.22	-0.02
	4.25	-0.01
	4.29	-0.02
	4.33	-0.03
	4.36	-0.02
	4.4	-0.03
	4.44	-0.01
	4.47	-0.02
	4.51	-0.03
	4.55	-0.03
	4.58	-0.01
	4.62	-0.01
	4.66	-0.02
	4.69	-0.01
	4.73	-0.02
	4.77	-0.02
	4.8	0
	4.84	-0.01
	4.88	0
	4.91	-0.03
	4.95	0
	4.99	-0.01
	5.02	-0.02
	5.06	-0.01
	5.1	-0.01
	5.13	-0.01
	5.17	0.01
	5.21	-0.01
	5.24	-0.02
	5.28	-0.02
	5.32	-0.03
	5.35	-0.02
	5.39	0
	5.43	-0.02
	5.46	0
	5.5	-0.01
	5.54	0
	5.57	-0.01
	5.61	-0.02
	5.65	-0.02
	5.68	-0.01
	5.72	-0.03
	5.76	-0.01
	5.79	-0.04
	5.83	-0.01
	5.87	-0.01
	5.9	-0.01
	5.94	-0.01
	5.98	-0.02
	6.01	-0.02
	6.05	-0.04
	6.09	-0.03
	6.12	-0.01
	6.16	-0.01
	6.2	-0.01
	6.23	0
	6.27	-0.02
	6.31	-0.02
	6.34	-0.02
	6.38	-0.03
	6.42	-0.02
	6.45	-0.01
	6.49	-0.01
	6.53	-0.03
	6.56	-0.02
	6.6	-0.01
	6.64	-0.03
	6.67	-0.01
	6.71	-0.03
	6.75	-0.01
	6.78	-0.02
	6.82	0
	6.86	0
	6.89	0
	6.93	-0.01
	6.97	0.01
	7	-0.01
	7.04	-0.01
	7.08	-0.02
	7.11	0
	7.15	0
	7.19	0
	7.22	-0.01
	7.26	0.01
	7.3	0.02
	7.33	0.02
	7.37	0.02
	7.41	0
	7.44	0.03
	7.48	0.04
	7.52	0.06
	7.55	0.08
	7.59	0.09
	7.63	0.13
	7.66	0.15
	7.7	0.18
	7.74	0.2
	7.77	0.22
	7.81	0.24
	7.85	0.21
	7.88	0.24
	7.92	0.23
	7.96	0.22
	7.99	0.21
	8.03	0.2
	8.07	0.2
	8.1	0.2
	8.14	0.2
	8.18	0.21
	8.21	0.21
	8.25	0.18
	8.29	0.2
	8.32	0.2
	8.36	0.19
	8.4	0.2
	8.43	0.21
	8.47	0.19
	8.51	0.19
	8.54	0.2
	8.58	0.18
	8.62	0.18
	8.65	0.19
	8.69	0.19
	8.73	0.2
	8.76	0.2
	8.8	0.22
	8.84	0.22
	8.87	0.24
	8.91	0.24
	8.95	0.26
	8.98	0.23
	9.02	0.26
	9.06	0.28
	9.09	0.28
	9.13	0.28
	9.17	0.3
	9.2	0.3
	9.24	0.32
	9.28	0.33
	9.31	0.33
	9.35	0.34
	9.39	0.34
	9.42	0.34
	9.46	0.38
	9.5	0.37
	9.53	0.38
	9.57	0.37
	9.61	0.37
	9.64	0.39
	9.68	0.38
	9.72	0.37
	9.75	0.37
	9.79	0.39
	9.83	0.4
	9.86	0.41
	9.9	0.42
	9.94	0.43
	9.97	0.45
	10.01	0.48
	10.05	0.54
	10.08	0.57
	10.12	0.66
	10.16	0.75
	10.19	0.88
	10.23	1.02
	10.27	1.2
	10.3	1.41
	10.34	1.68
	10.38	1.99
	10.41	2.32
	10.45	2.68
	10.49	3.06
	10.52	3.48
	10.56	3.91
	10.6	4.29
	10.63	4.72
	10.67	5.08
	10.71	5.41
	10.74	5.72
	10.78	5.96
	10.82	6.17
	10.85	6.3
	10.89	6.36
	10.93	6.38
	10.96	6.36
	11	6.28
	11.04	6.13
	11.07	5.98
	11.11	5.78
	11.15	5.56
	11.18	5.34
	11.22	5.06
	11.26	4.81
	11.29	4.56
	11.33	4.31
	11.37	4.09
	11.4	3.84
	11.44	3.62
	11.48	3.4
	11.51	3.21
	11.55	3.01
	11.59	2.81
	11.62	2.66
	11.66	2.47
	11.7	2.32
	11.73	2.19
	11.77	2.03
	11.81	1.91
	11.84	1.77
	11.88	1.67
	11.92	1.55
	11.95	1.46
	11.99	1.38
	12.03	1.27
	12.06	1.18
	12.1	1.09
	12.14	1.02
	12.17	0.92
	12.21	0.87
	12.25	0.81
	12.28	0.74
	12.32	0.66
	12.36	0.62
	12.39	0.56
	12.43	0.52
	12.47	0.49
	12.5	0.45
	12.54	0.38
	12.58	0.35
	12.61	0.31
	12.65	0.32
	12.69	0.27
	12.72	0.23
	12.76	0.23
	12.8	0.21
	12.83	0.19
	12.87	0.14
	12.91	0.15
	12.94	0.12
	12.98	0.11
	13.02	0.1
	13.05	0.11
	13.09	0.08
	13.13	0.08
	13.16	0.08
	13.2	0.06
	13.24	0.06
	13.27	0.05
	13.31	0.04
	13.35	0.04
	13.38	0.05
	13.42	0.06
	13.46	0.01
	13.49	0.03
	13.53	0.02
	13.57	0.04
	13.6	0.03
	13.64	0.05
	13.68	0.02
	13.71	0.04
	13.75	0.04
	13.79	0.03
	13.82	0.03
	13.86	0.03
	13.9	0.04
	13.93	0.06
	13.97	0.05
	14.01	0.05
	14.04	0.05
	14.08	0.03
	14.12	0.06
	14.15	0.05
	14.19	0.05
	14.23	0.07
	14.26	0.07
	14.3	0.05
	14.34	0.08
	14.37	0.06
	14.41	0.06
	14.45	0.09
	14.48	0.06
	14.52	0.08
	14.56	0.06
	14.59	0.07
	14.63	0.07
	14.67	0.07
	14.7	0.06
	14.74	0.07
	14.78	0.06
	14.81	0.06
	14.85	0.06
	14.89	0.05
	14.92	0.05
	14.96	0.05
	15	0.04
	15.03	0.05
	15.07	0.04
	15.11	0.04
	15.14	0.03
	15.18	0.05
	15.22	0.03
	15.25	0.03
	15.29	0.03
	15.33	0.03
	15.36	0.02
	15.4	0.03
	15.44	0.02
	15.47	0.03
	15.51	0.02
	15.55	0.02
	15.58	0.05
	15.62	0.03
	15.66	0.01
	15.69	-0.01
	15.73	0.01
	15.77	0.02
	15.8	0.02
	15.84	0.01
	15.88	0
	15.91	-0.01
	15.95	0
	15.99	-0.01
	16.02	0.01
	16.06	0.01
	16.1	0.02
	16.13	0.01
	16.17	0
	16.21	-0.02
	16.24	0
	16.28	0.01
	16.32	-0.01
	16.35	0.01
	16.39	-0.01
	16.43	0
	16.46	0.02
	16.5	0
	16.54	0.01
	16.57	0.03
	16.61	0.02
	16.65	0.01
	16.68	0.01
	16.72	0.02
	16.76	0.02
	16.79	0.01
	16.83	0.01
	16.87	0.02
	16.9	0.01
	16.94	0.02
	16.98	0.04
	17.01	0.01
	17.05	-0.01
	17.09	0.02
	17.12	0.01
	17.16	0.04
	17.2	0.03
	17.23	0.02
	17.27	0.02
	17.31	0.02
	17.34	0.03
	17.38	0.05
	17.42	0.01
	17.45	0.02
	17.49	0.03
	17.53	0.04
	17.57	0.02
	17.6	0.03
	17.64	0.03
	17.68	0.04
	17.71	0.02
	17.75	0.02
	17.79	0.04
	17.82	0.03
	17.86	0.04
	17.9	0.03
	17.93	0.03
	17.97	0.05
	18.01	0.03
	18.04	0.03
	18.08	0.03
	18.12	0.04
	18.15	0.04
	18.19	0.06
	18.23	0.05
	18.26	0.04
	18.3	0.05
	18.34	0.04
	18.37	0.04
	18.41	0.06
	18.45	0.07
	18.48	0.06
	18.52	0.08
	18.56	0.06
	18.59	0.07
	18.63	0.07
	18.67	0.06
	18.7	0.08
	18.74	0.09
	18.78	0.1
	18.81	0.1
	18.85	0.12
	18.89	0.11
	18.92	0.11
	18.96	0.12
	19	0.14
	19.03	0.15
	19.07	0.2
	19.11	0.21
	19.14	0.2
	19.18	0.19
	19.22	0.21
	19.25	0.23
	19.29	0.22
	19.33	0.24
	19.36	0.24
	19.4	0.24
	19.44	0.23
	19.47	0.23
	19.51	0.23
	19.55	0.24
	19.58	0.22
	19.62	0.21
	19.66	0.22
	19.69	0.2
	19.73	0.2
	19.77	0.21
	19.8	0.2
	19.84	0.19
	19.88	0.17
	19.91	0.18
	19.95	0.15
	19.99	0.15
	20.02	0.13
	20.06	0.1
	20.1	0.08
	20.13	0.09
	20.17	0.08
	20.21	0.08
	20.24	0.08
	20.28	0.11
	20.32	0.1
	20.35	0.12
	20.39	0.11
	20.43	0.12
	20.46	0.13
	20.5	0.14
	20.54	0.18
	20.57	0.21
	20.61	0.25
	20.65	0.21
	20.68	0.25
	20.72	0.26
	20.76	0.27
	20.79	0.27
	20.83	0.29
	20.87	0.29
	20.9	0.31
	20.94	0.32
	20.98	0.34
	21.01	0.33
	21.05	0.29
	21.09	0.27
	21.12	0.24
	21.16	0.21
	21.2	0.2
	21.23	0.16
	21.27	0.15
	21.31	0.13
	21.34	0.11
	21.38	0.13
	21.42	0.14
	21.45	0.1
	21.49	0.11
	21.53	0.1
	21.56	0.09
	21.6	0.07
	21.64	0.08
	21.67	0.08
	21.71	0.09
	21.75	0.09
	21.78	0.07
	21.82	0.06
	21.86	0.08
	21.89	0.06
	21.93	0.07
	21.97	0.07
	22	0.05
	22.04	0.05
	22.08	0.05
	22.11	0.05
	22.15	0.03
	22.19	0.05
	22.22	0.06
	22.26	0.05
	22.3	0.04
	22.33	0.05
	22.37	0.05
	22.41	0.04
	22.44	0.05
	22.48	0.04
	22.52	0.05
	22.55	0.05
	22.59	0.05
	22.63	0.04
	22.66	0.03
	22.7	0.03
	22.74	0.05
	22.77	0.05
	22.81	0.05
	22.85	0.05
	22.88	0.03
	22.92	0.05
	22.96	0.05
	22.99	0.05
	23.03	0.05
	23.07	0.04
	23.1	0.07
	23.14	0.08
	23.18	0.07
	23.21	0.07
	23.25	0.1
	23.29	0.09
	23.32	0.11
	23.36	0.1
	23.4	0.11
	23.43	0.13
	23.47	0.12
	23.51	0.12
	23.54	0.14
	23.58	0.12
	23.62	0.12
	23.65	0.12
	23.69	0.14
	23.73	0.12
	23.76	0.12
	23.8	0.11
	23.84	0.08
	23.87	0.08
	23.91	0.07
	23.95	0.07
	23.98	0.07
	24.02	0.09
	24.06	0.09
	24.09	0.06
	24.13	0.08
	24.17	0.05
	24.2	0.06
	24.24	0.06
	24.28	0.05
	24.31	0.05
	24.35	0.05
	24.39	0.02
	24.42	0.02
	24.46	0.04
	24.5	0.08
	24.53	0.08
	24.57	0.06
	24.61	0.04
	24.64	0.05
	24.68	0.03
	24.72	0.02
	24.75	0.03
	24.79	0
	24.83	-0.01
	24.86	0.01
	24.9	0.02
	24.94	0.03
	24.97	0.01
	25.01	0.01
	25.05	0.01
	25.08	0.01
	25.12	0.01
	25.16	0.01
	25.19	-0.01
	25.23	0.01
	25.27	-0.01
	25.3	0.01
	25.34	0.01
	25.38	-0.01
	25.41	-0.02
	25.45	-0.01
	25.49	-0.01
	25.52	-0.01
	25.56	-0.01
	25.6	-0.02
	25.63	-0.03
	25.67	-0.01
	25.71	-0.02
	25.74	-0.01
	25.78	-0.01
	25.82	-0.02
	25.85	-0.02
	25.89	0
	25.93	0.01
	25.96	-0.03
	26	0
	26.04	-0.02
	26.07	-0.04
	26.11	-0.03
	26.15	-0.01
	26.18	-0.02
	26.22	-0.03
	26.26	-0.02
	26.29	-0.02
	26.33	-0.02
	26.37	-0.01
	26.4	-0.01
	26.44	-0.02
	26.48	-0.01
	26.51	-0.02
	26.55	0.01
	26.59	-0.02
	26.62	-0.03
	26.66	-0.02
	26.7	-0.02
	26.73	-0.01
	26.77	-0.02
	26.81	-0.03
	26.84	-0.02
	26.88	-0.02
	26.92	-0.03
	26.95	-0.04
	26.99	-0.01
	27.03	-0.03
	27.06	-0.02
	27.1	-0.01
	27.14	0.01
	27.17	-0.03
	27.21	-0.02
	27.25	-0.03
	27.28	-0.02
	27.32	-0.02
	27.36	-0.04
	27.39	-0.03
	27.43	-0.01
	27.47	-0.01
	27.5	-0.02
	27.54	-0.01
	27.58	-0.03
	27.61	-0.01
	27.65	-0.02
	27.69	-0.03
	27.72	-0.03
	27.76	-0.05
	27.8	-0.03
	27.83	-0.01
	27.87	-0.03
	27.91	-0.03
	27.94	-0.03
	27.98	-0.03
	28.02	-0.03
	28.05	-0.02
	28.09	-0.02
	28.13	-0.03
	28.16	-0.04
	28.2	-0.03
	28.24	-0.02
	28.27	-0.02
	28.31	-0.03
	28.35	-0.02
	28.38	-0.04
	28.42	-0.01
	28.46	-0.03
	28.49	-0.02
	28.53	-0.01
	28.57	-0.03
	28.6	-0.03
	28.64	-0.03
	28.68	-0.03
	28.71	-0.01
	28.75	0
	28.79	-0.02
	28.82	-0.01
	28.86	-0.01
	28.9	-0.02
	28.93	-0.02
	28.97	-0.02
	29.01	-0.02
	29.04	-0.03
	29.08	-0.02
	29.12	-0.01
	29.15	0
	29.19	-0.03
	29.23	0
	29.26	-0.01
	29.3	-0.02
	29.34	-0.02
	29.37	0
	29.41	-0.01
	29.45	-0.01
	29.48	0
	29.52	0.01
	29.56	0
	29.59	0
	29.63	0
	29.67	0.01
	29.7	0
	29.74	0.02
	29.78	0.01
	29.81	0.03
	29.85	0.04
	29.89	0.02
	29.92	0.03
	29.96	0
	30	0.01
	30.03	0.03
	30.07	0.01
	30.11	0.01
	30.14	0.01
	30.18	0.02
	30.22	0.02
	30.25	0.01
	30.29	0.01
	30.33	0
	30.36	0
	30.4	0.01
	30.44	0
	30.47	-0.01
	30.51	-0.02
	30.55	-0.02
	30.58	-0.02
	30.62	-0.02
	30.66	0
	30.69	-0.02
	30.73	-0.01
	30.77	-0.02
	30.8	-0.02
	30.84	-0.02
	30.88	-0.01
	30.91	-0.02
	30.95	-0.01
	30.99	-0.02
	31.02	-0.03
	31.06	-0.02
	31.1	-0.03
	31.13	-0.04
	31.17	-0.02
	31.21	-0.05
	31.24	-0.02
	31.28	-0.03
	31.32	-0.03
	31.35	-0.03
	31.39	-0.03
	31.43	-0.03
	31.46	-0.02
	31.5	-0.03
	31.54	-0.04
	31.57	-0.05
	31.61	-0.03
	31.65	-0.04
	31.68	-0.04
	31.72	-0.01
	31.76	-0.04
	31.79	-0.03
	31.83	-0.03
	31.87	-0.03
	31.9	-0.03
	31.94	-0.04
	31.98	-0.03
	32.01	-0.05
	32.05	-0.03
	32.09	-0.02
	32.12	-0.03
	32.16	-0.04
	32.2	-0.03
	32.23	-0.03
	32.27	-0.02
	32.31	-0.04
	32.34	-0.03
	32.38	-0.03
	32.42	-0.02
	32.45	-0.02
	32.49	-0.03
	32.53	-0.03
	32.56	-0.02
	32.6	-0.05
	32.64	-0.04
	32.67	-0.03
	32.71	-0.03
	32.75	-0.05
	32.78	-0.03
	32.82	-0.03
	32.86	-0.04
	32.89	-0.05
	32.93	-0.04
	32.97	-0.04
	33	-0.03
	33.04	-0.04
	33.08	-0.02
	33.11	-0.04
	33.15	-0.04
	33.19	-0.04
	33.22	-0.03
	33.26	-0.03
	33.3	-0.04
	33.33	-0.05
	33.37	-0.05
	33.41	-0.05
	33.44	-0.03
	33.48	-0.05
	33.52	-0.03
	33.55	-0.04
	33.59	-0.04
	33.63	-0.02
	33.66	-0.04
	33.7	-0.05
	33.74	-0.02
	33.77	-0.04
	33.81	-0.03
	33.85	-0.02
	33.88	-0.03
	33.92	-0.04
	33.96	-0.03
	33.99	-0.04

## Sheet: Figure 1-supplB
		normalized peak height
		exp 1	exp 2	exp 3	exp 4	exp 5	exp 1	exp 2	exp 3
	Temperature (deg)	FPN					FPN + vamifeport
	15	0.935226	0.972955	1	0.924662		0.985954	0.966955	0.932453
	30	1	0.993474	0.819369	0.921936	0.83596	1	0.989464	1
	40	0.934719	0.915832	0.853163	0.868481		0.958712	1	0.857918
	45	0.696084	0.719748	0.627572	0.603194	0.612388	0.821604	0.825729	0.748471
	48	0.428309		0.363058			0.70459		0.559813
	50	0.260501	0.313928	0.209357		0.325998	0.531305	0.616432	0.423167
	60	0.115675	0.0614807	0.105578	0.0543403	0.0431117	0.262975	0.160039	0.152602
	75	0	0	0	0		0	0	0
		peak height mA
	15	38.692	50.7183	42.7111	43.5017		36.2218	47.6904	36.1031
	30	40.8615	51.6932	36.2072	43.3856	39.7239	36.6358	48.6676	38.2449
	40	38.6751	48.0042	37.424	41.1089		35.419	49.125	33.7398
	45	30.6827	38.6879	29.3013	29.8102	30.2018	31.3781	41.5593	30.2694
	48	21.7143		19.777			27.9295		24.2874
	50	16.0941	19.4066	14.2428		18.0044	22.8225	32.4731	19.9546
	60	11.2436	7.41233	10.5061	6.43438	5.95614	14.9143	12.6596	11.3755
	75	7.36937	4.49126	6.70463	4.12		7.16394	5.71182	6.53678

## Sheet: Figure 1-supplC
	empty Liposomes
		exp 1	exp 2	exp 3		exp 1	exp 2	exp 3		exp 1	exp 2	exp 3		exp 1	exp 2	exp 3		exp 1	exp 2	exp 3
	Time norm	0 μM MnCl2				1 μM MnCl2				10 μM MnCl2				50 μM MnCl2				200 μM MnCl2
	-9.98152	118.917	118.15	145.603		117.382	119.284	151.412		119.556	117.536	155.262		128.501	120.246	153.018		132.665	114.081	155.251
	-9.91422	117.341	117.359	145.071		116.689	120.192	144.874		116.56	117.894	153.359		127.262	121.635	150.879		129.334	114.747	152.008
	-9.8478	116.474	116.617	142.979		120.235	119.177	146.322		117.469	116.155	154.718		127.896	120.94	149.389		130.985	113.62	149.691
	-9.78088	116.894	116.568	141.773		115.729	118.803	146.842		117.683	114.775	151.612		126.34	122.489	150.42		127.83	114.132	148.88
	-9.71422	117.236	115.678	144.184		115.036	118.002	148.514		116.881	114.877	149.942		125.965	119.177	148.625		128.154	114.235	149.807
	-9.64757	113.847	115.381	142.27		113.65	117.735	144.279		116.613	114.775	149.398		129.28	120.246	149.618		125.236	114.286	148.88
	-9.58115	113.899	113.996	144.22		113.97	115.598	144.614		114.767	113.548	148.583		125.965	119.925	148.663		127.064	114.388	151.197
	-9.51422	116.185	115.579	143.582		116.342	116.079	145.765		116.025	114.059	150.175		125.937	120.513	148.205		128.007	113.518	147.683
	-9.44755	114.214	115.282	142.482		113.783	118.376	143.425		114.312	113.446	148.777		124.438	119.017	145.798		127.506	112.033	150.772
	-9.3809	113.452	113.848	140.035		111.837	114.904	144.465		114.821	114.11	147.068		123.573	118.002	149.121		125.825	112.698	148.996
	-9.31422	114.714	115.183	141.631		111.597	115.812	141.716		113.456	111.452	146.951		126.311	119.605	148.625		126.651	113.006	145.907
	-9.24757	113.321	113.947	142.589		113.73	116.346	142.979		113.938	113.855	149.476		123.516	118.376	144.92		125.147	112.391	146.178
	-9.18087	112.349	114.194	141.383		112.157	115.491	143.574		114.205	111.656	145.942		124.438	119.071	143.697		124.528	111.367	145.946
	-9.11422	112.218	114.59	139.078		110.824	114.744	142.868		112.012	110.685	146.951		124.784	118.857	145.684		125.354	111.316	146.95
	-9.04755	111.666	111.424	140.957		110.824	115.812	140.305		113.59	111.963	144.583		120.922	116.987	142.628		123.231	111.521	143.012
	-8.98088	111.771	113.304	139.752		110.637	116.4	143.388		112.52	110.838	143.612		122.622	118.269	141.826		124.027	111.214	143.359
	-8.91422	112.796	112.562	139.645		110.797	113.194	142.905		113.055	111.35	145.709		121.326	117.949	143.659		123.172	111.418	141.313
	-8.84755	112.638	113.699	137.411		111.17	113.194	140.862		110.781	109.254	142.447		122.767	117.094	141.864		122.524	109.473	143.436
	-8.78088	112.139	113.205	140.461		111.33	114.103	139.413		112.707	110.89	144.854		120.692	116.346	142.246		121.846	110.241	143.591
	-8.71422	112.165	111.672	137.589		109.997	113.301	137.593		112.386	109.765	142.718		120.605	115.705	139.725		125.354	108.807	142.78
	-8.64755	112.559	111.276	137.837		111.624	112.233	136.181		112.948	108.947	142.563		122.767	115.865	140.985		124.794	109.37	141.737
	-8.58108	110.694	112.166	138.83		110.77	112.821	139.264		111.289	108.64	143.534		120.519	116.293	141.444		126.238	109.268	142.51
	-8.51442	111.482	111.968	138.475		112.477	113.568	140.156		111.798	107.771	142.447		120.403	116.667	141.367		124.145	108.193	141.467
	-8.44748	112.007	110.435	138.121		113.196	113.355	137.63		112.467	110.072	143.184		121.729	117.041	140.183		123.939	108.039	142.973
	-8.38108	111.377	109.594	138.546		108.931	112.126	137.37		111.423	108.333	145.087		119.107	113.729	140.909		122.848	110.906	143.861
	-8.31415	112.165	112.463	137.589		111.757	112.553	138.447		109.845	108.18	142.214		120.403	113.248	139.801		120.578	109.421	141.815
	-8.24748	109.827	110.237	136.596		112.637	113.301	139.116		111.61	109.305	140.854		121.268	113.835	138.312		122.494	109.012	141.622
	-8.18083	111.797	110.93	136.915		107.625	113.301	135.55		110.647	108.333	141.282		121.988	114.209	141.864		120.43	108.039	139.344
	-8.11415	113.006	110.336	134.858		109.144	111.111	136.218		110.326	107.618	142.951		118.53	114.744	138.808		125.383	109.268	139.266
	-8.04748	111.797	111.078	135.78		108.638	111.699	135.884		111.316	107.566	141.786		120.461	112.714	139.954		123.703	106.349	140.386
	-7.98083	110.273	110.534	134.894		109.704	108.921	137.147		111.263	106.391	139.573		123.055	114.69	140.26		123.172	107.424	141.351
	-7.91417	111.929	109.743	135.319		110.317	111.592	135.513		110.781	108.078	139.184		119.481	113.835	138.273		120.077	107.373	139.614
	-7.8475	110.51	109.891	133.475		110.104	111.058	136.924		108.775	107.618	139.34		119.971	111.966	137.357		121.344	107.322	140.927
	-7.78083	110.063	110.435	135.177		109.198	112.66	135.81		111.637	106.135	140.039		120.519	113.088	137.51		124.322	107.783	141.544
	-7.71417	111.088	109.05	135.887		108.584	111.111	134.547		108.828	105.573	141.204		120	111.752	137.548		121.993	105.325	139.846
	-7.64748	110.562	109.99	134.007		108.131	109.936	134.101		111.664	105.521	139.806		121.153	111.592	138.885		122.553	108.346	139.73
	-7.58083	109.327	108.358	132.943		109.304	110.256	135.475		109.203	105.061	142.097		120.403	112.019	136.975		121.728	106.861	138.649
	-7.51415	108.25	109.397	133.688		108.238	108.6	134.844		108.989	106.339	143.495		117.81	109.882	138.655		121.315	106.759	140.386
	-7.4475	108.303	108.111	134.326		108.611	110.47	134.138		110.567	107.464	139.922		117.81	113.301	139.725		121.963	106.349	139.961
	-7.38083	108.854	107.319	132.695		110.477	111.271	134.398		109.925	104.806	140.854		119.078	110.791	137.051		124.676	108.756	139.189
	-7.31417	110.667	109.693	132.589		108.131	111.432	133.841		112.279	105.93	140.155		119.395	111.592	138.961		120.755	106.605	138.533
	-7.24747	109.564	109.149	133.511		107.865	109.135	133.135		110.353	105.879	140.155		119.135	113.408	133.384		120.46	105.632	138.919
	-7.18082	108.092	108.655	132.979		109.944	109.722	135.067		110.032	106.033	140.854		118.646	113.301	138.694		121.374	106.605	137.22
	-7.11433	110.089	107.913	134.894		108.984	110.737	132.912		109.925	103.272	138.019		118.271	110.043	133.613		121.551	105.684	140.116
	-7.04742	107.462	107.962	131.773		108.931	108.868	133.841		110.861	106.8	137.087		118.386	111.218	136.669		121.757	105.274	137.992
	-6.98075	109.249	107.27	129.787		109.064	110.47	132.244		109.631	105.01	137.515		119.078	109.776	133.613		120.637	105.12	138.456
	-6.91408	109.984	107.567	133.121		109.651	109.776	135.438		107.41	106.442	137.631		117.81	109.829	134.798		119.9	105.786	136.062
	-6.84742	108.776	107.765	131.738		108.504	109.402	131.389		110.086	104.294	137.903		117.983	111.111	138.732		118.956	105.735	138.571
	-6.781	108.066	106.429	129.823		108.078	109.241	135.067		109.417	104.755	136.932		117.55	109.615	134.148		120.991	105.888	138.61
	-6.71432	109.143	107.221	132.766		109.757	108.28	132.058		108.748	105.215	137.981		120.375	110.47	133.193		122.671	104.455	135.212
	-6.64763	108.723	107.221	130.816		107.545	109.188	130.758		108.989	102.965	137.631		116.628	109.509	134.148		121.167	104.199	136.255
	-6.58097	109.932	108.21	131.17		110.157	111.859	132.132		108.587	104.499	140.194		118.674	111.806	135.752		119.929	104.711	138.417
	-6.51403	108.014	107.27	130.213		108.958	110.524	131.984		110.54	105.061	139.223		120.144	111.592	134.874		121.108	105.684	134.71
	-6.44763	108.355	107.023	130.922		110.664	109.081	133.841		111.557	104.346	139.379		118.04	108.814	133.957		120.254	105.274	139.614
	-6.38097	105.491	106.627	131.206		109.331	108.066	132.318		108.561	102.658	134.99		118.3	109.081	132.277		120.548	103.533	137.452
	-6.31403	108.25	105.984	128.936		105.865	108.226	134.064		109.577	104.346	132.932		117.061	107.906	131.398		121.639	104.25	134.672
	-6.24763	108.487	106.182	130.709		107.465	108.654	131.686		106.849	103.067	136.078		117.695	107.746	133.461		124.116	102.663	133.977
	-6.1807	107.068	105.836	131.17		109.731	107.906	130.572		108.026	102.505	136.311		116.772	109.615	131.895		121.403	103.328	134.324
	-6.11432	106.595	106.034	131.525		107.385	107.425	132.689		107.491	100.665	136.505		118.3	107.906	132.468		118.927	105.376	134.517
	-6.04737	109.432	106.479	128.688		109.651	108.226	133.841		108.347	102.556	136.466		120.49	110.043	132.544		122.14	103.635	133.436
	-5.98072	109.38	106.726	130.177		107.865	110.844	129.829		108.4	104.806	135.068		119.078	109.188	136.402		123.084	103.738	141.12
	-5.91403	105.991	106.825	129.397		107.518	106.036	134.993		109.444	101.789	138.99		118.674	108.066	132.811		118.662	103.021	135.753
	-5.84738	107.698	106.083	132.447		109.944	106.036	131.575		110.166	103.528	135.534		118.04	107.639	131.818		120.165	103.482	136.641
	-5.7807	107.462	105.242	129.043		106.105	107.105	130.089		106.688	102.198	135.107		117.233	108.868	132.926		122.73	104.25	133.784
	-5.71403	109.354	105.885	129.468		106.958	107.318	130.609		107.437	103.272	133.592		117.233	109.135	130.367		119.015	102.867	134.903
	-5.64738	105.885	106.528	130.745		105.678	107.585	128.752		109.577	101.431	133.592		114.496	108.6	130.252		122.229	101.382	134.749
	-5.58072	106.463	104.5	128.794		107.731	106.784	133.507		108.454	103.579	134.99		115.159	109.135	131.589		120.932	102.816	134.363
	-5.51405	106.148	106.528	129.078		106.558	107.425	132.727		109.283	100.409	136.427		117.666	107.158	132.62		118.868	103.277	134.788
	-5.44738	107.015	106.281	131.099		107.625	106.944	130.795		108.026	103.374	135.068		115.85	107.318	132.697		121.167	103.226	132.51
	-5.38072	107.383	105.045	130.638		107.305	106.571	129.309		107.892	102.812	134.602		118.444	107.532	130.519		120.578	102.714	136.216
	-5.31405	106.726	105.786	128.121		107.651	106.143	129.458		105.645	102.914	135.612		116.744	106.624	132.2		119.517	103.328	136.216
	-5.24738	107.042	106.924	130.532		105.972	106.357	129.421		107.705	100.716	134.214		116.888	107.158	134.034		118.013	103.072	136.718
	-5.18067	106.647	103.264	129.291		104.985	106.197	130.461		107.945	102.198	133.942		117.723	107.799	132.009		120.755	102.867	131.699
	-5.11402	105.36	103.462	129.504		107.811	105.182	129.532		107.785	100.307	134.563		115.821	106.998	132.238		120.077	101.997	132.703
	-5.04735	104.283	104.55	129.645		109.118	106.143	129.755		106.394	102.556	133.67		115.879	106.944	131.283		119.074	101.895	135.753
	-4.98095	104.23	103.314	127.943		107.518	103.152	130.535		106.875	100.716	134.602		115.937	105.823	130.138		121.315	103.072	136.332
	-4.91402	104.808	106.083	127.305		107.278	105.823	129.569		109.47	101.687	136.621		117.839	108.44	129.297		118.455	102.151	137.452
	-4.84735	107.462	104.847	129.787		107.305	105.769	131.872		105.886	102.198	132.039		117.349	105.662	132.62		120.224	103.175	133.707
	-4.78068	104.178	102.077	130.248		106.612	105.716	130.201		108.507	100.204	132.66		114.957	106.998	132.735		121.138	103.072	133.514
	-4.714	105.964	105.341	128.972		107.091	106.838	129.606		107.598	102.965	133.825		116.571	106.143	130.328		119.9	101.229	135.097
	-4.64735	102.838	104.006	128.617		107.811	105.823	128.603		108.721	101.278	135.262		117.061	105.021	130.443		117.188	103.123	132.625
	-4.58067	104.808	101.731	127.447		105.972	106.838	129.086		109.925	101.738	131.146		115.965	104.968	129.374		118.779	100.614	131.892
	-4.51402	105.413	103.759	128.227		107.625	105.769	129.086		106.421	101.431	135.107		115.994	105.769	132.353		121.521	101.485	135.29
	-4.4475	103.731	102.77	127.553		107.571	105.449	125.706		106.528	102.301	131.495		116.83	105.128	129.03		118.75	101.382	133.784
	-4.38083	104.362	104.303	129.787		104.585	106.998	130.646		107.678	100.204	133.01		115.735	108.12	131.245		119.575	100.768	132.239
	-4.31417	104.598	103.66	127.234		105.092	103.9	126.895		105.886	99.9489	133.592		116.311	105.556	128.801		115.448	102.202	133.166
	-4.2475	105.229	102.621	128.936		105.652	106.571	129.309		107.945	99.6933	133.282		116.081	106.571	130.863		117.423	101.741	133.514
	-4.18083	105.386	104.006	127.837		108.638	105.502	130.052		106.742	100.051	131.107		115.504	106.197	127.731		117.659	100.358	133.475
	-4.11417	102.286	102.275	129.255		107.598	105.662	130.238		109.096	100.869	135.612		115.043	104.113	127.426		118.219	100.614	132.587
	-2.39618	105.702	104.105	125.461		113.516	113.568	121.582		114.339	110.174	124.583		120.403	113.248	125.783		127.535	106.964	127.027
	-2.35293	105.885	107.221	124.078		111.624	112.233	121.694		115.329	110.787	125.786		126.369	111.966	126.089		127.3	106.912	126.1
	-2.3097	106.989	105.687	127.234		113.063	112.714	118.796		116.185	108.793	124.893		121.499	112.607	126.547		125.177	107.271	123.629
	-2.26647	107.488	106.182	125.071		114.716	112.286	121.211		116.132	108.947	127.456		121.902	112.233	125.057		126.268	106.349	127.066
	-2.22325	106.332	104.946	122.553		112.557	112.179	124.517		116.158	106.391	126.641		123.833	111.912	124.484		125.796	107.937	123.977
	-2.18002	106.595	105.935	123.156		114.103	111.966	122.251		117.389	108.18	126.058		125.187	113.462	124.484		128.833	107.476	124.981
	-2.13678	105.097	105.292	125.248		112.717	111.912	120.617		115.249	106.851	125.592		124.006	113.034	125.745		125.501	107.373	127.259
	-2.0933	106.726	106.924	123.475		113.09	112.607	122.474		114.045	109.049	125.631		120.836	114.049	123.033		126.12	107.885	126.448
	-2.05007	105.465	103.759	124.61		112.237	109.829	121.062		115.302	108.436	126.097		121.902	112.553	126.05		128.744	106.042	126.1
	-2.00683	104.598	104.649	123.227		112.45	112.019	122.697		114.821	108.333	130.563		121.671	113.622	125.936		126.621	109.165	125.097
	-1.96362	107.856	105.935	122.376		112.21	113.568	122.66		114.339	108.64	126.796		124.813	112.019	126.7		127.948	109.473	128.61
	-1.92038	107.488	105.44	124.716		110.237	112.821	125.26		115.516	110.634	126.68		122.824	112.286	125.057		129.245	108.449	124.093
	-1.87715	105.202	104.204	125.993		114.849	113.835	122.511		119.074	107.004	125.398		122.219	113.301	125.898		129.629	107.629	128.108
	-1.83392	105.623	105.045	123.44		112.797	113.622	121.397		113.67	108.078	126.019		120.836	112.126	126.203		129.599	108.909	126.139
	-1.79068	106.7	105.737	122.021		114.37	110.577	122.697		115.436	108.896	125.204		123.602	113.248	125.668		128.656	106.247	126.178
	-1.74722	106.7	105.045	125.177		113.996	113.942	121.731		115.516	107.413	126.291		122.046	109.081	122.842		125.59	106.759	127.22
	-1.70402	106.726	106.726	125.816		111.97	110.203	122.883		113.162	106.237	126.252		120.058	111.058	127.12		126.975	105.786	126.1
	-1.66052	108.46	104.797	124.007		111.81	112.5	121.211		116.185	108.027	124.932		120.49	111.699	122.383		126.71	106.144	125.483
	-1.61728	107.12	106.281	123.262		111.25	111.378	120.245		116.025	106.442	125.786		121.643	113.515	124.866		125.354	106.708	126.525
	-1.57407	107.462	105.391	123.369		113.09	112.126	122.771		115.918	105.675	123.495		121.239	113.729	124.332		124.351	106.093	123.436
	-1.53083	106.674	105.836	124.255		113.57	111.004	121.991		112.012	106.288	130.136		121.383	110.791	124.026		129.216	105.12	126.602
	-1.4876	107.357	107.27	122.872		111.33	109.882	119.131		114.901	106.8	123.301		123.285	111.165	125.516		129.481	104.608	125.985
	-1.44437	107.357	104.847	125.355		111.384	110.844	119.391		113.403	105.317	123.573		121.412	111.806	124.102		127.801	105.53	124.208
	-1.40115	106.069	103.264	123.901		110.904	110.417	118.016		113.189	105.215	126.68		119.741	109.989	123.568		127.3	103.891	124.71
	-1.35765	107.436	105.836	124.716		111.01	108.761	121.285		112.948	105.419	124.117		123.919	110.63	124.026		125.708	105.274	123.591
	-1.31443	106.726	105.44	122.908		109.038	110.897	121.025		115.329	105.777	123.961		119.827	110.791	121.772		127.123	104.557	125.521
	-1.27093	104.94	104.451	122.66		111.437	109.936	122.437		112.627	105.624	123.456		120.951	109.722	121.849		123.644	105.53	124.363
	-1.22772	105.675	105.44	123.546		110.504	108.868	120.877		113.162	104.141	125.709		120.317	109.081	123.797		125.324	104.25	124.054
	-1.18448	106.306	106.281	122.163		112.743	107.746	120.654		112.065	105.061	124.932		119.049	109.455	122.727		124.116	103.431	125.714
	-1.14098	107.409	106.083	123.333		111.064	110.417	119.651		113.938	105.982	122.641		119.28	107.959	122.154		125.442	104.813	123.282
	0	100	100	100		100	100	100		100	100	100		100	100	100		100	100	100
	0.04335	100.368	100.692	101.454		99.7334	100.267	100		98.2076	97.8528	103.612		100.951	98.9316	99.618		102.506	102.97	98.8417
	0.0865833	98.1345	99.9505	103.475		98.7203	99.8932	99.9257		99.786	96.9836	98.9126		98.9337	98.1838	97.479		100.531	99.488	98.2239
	0.1298	99.1855	100.495	101.135		98.6937	100.481	97.5111		99.9732	98.5174	102.602		100.144	99.3056	99.5798		99.0566	99.488	97.4131
	0.173033	99.238	99.3571	101.454		99.7334	98.8248	98.0312		99.8127	99.3354	99.4175		98.5879	99.359	98.2811		100.767	101.075	98.3398
	0.216267	99.3694	99.0603	101.525		97.8939	98.7714	97.7712		98.7961	98.6708	100.117		98.3862	98.4509	97.3262		97.4057	100.205	98.8031
	0.2595	99.238	99.7033	99.5035		99.1469	97.8098	97.9569		99.0637	101.125	99.1456		98.9337	98.8248	96.4859		100.855	101.843	97.7992
	0.302733	97.0047	99.4065	99.2553		96.4809	100.481	97.9941		101.017	97.7505	99.4563		100.576	98.6645	97.5172		102.3	100.461	96.6023
	0.34595	98.7651	99.3076	101.667		99.6801	99.7329	98.0312		98.4484	98.5174	98.7961		98.9049	99.9466	96.6005		100.472	102.048	97.2973
	0.389183	98.1083	99.3076	101.844		97.6806	100.107	98.2169		98.2879	98.4663	99.8058		101.124	98.2906	98.4721		100.767	100.768	98.4942
	0.4324	97.6879	99.8022	99.7518		95.8944	99.1453	98.0312		97.9133	97.6994	97.8641		99.1066	97.5962	97.861		99.0566	102.765	98.1081
	0.4759	97.32	101.187	99.1135		96.6676	98.8782	97.5111		96.3884	96.7791	99.1845		98.732	98.7714	96.5241		99.0271	101.28	96.6409
	0.519133	98.5024	99.7033	101.986		95.8944	99.4124	98.3655		97.0037	97.137	99.6893		100.72	98.5043	97.3262		101.651	100.307	96.4093
	0.56235	98.8965	100.297	100.709		97.2274	99.5192	97.6226		98.0203	96.6258	99.4951		98.3285	95.5662	96.9824		97.8184	100.102	95.3668
	0.605583	98.7651	100.099	98.7589		97.0674	98.7179	97.214		97.7796	95.501	97.9806		97.3199	95.6197	96.6387		97.612	101.792	97.9537
	0.648833	99.0804	98.4669	99.5035		95.7078	98.0769	97.8826		96.6827	96.1145	97.9806		97.2334	95.7265	96.5623		98.6144	99.744	96.3707
	0.692067	97.3463	100.049	100.816		98.0805	99.1453	97.214		96.7362	95.6544	98.9126		98.4438	96.3675	95.6073		97.0814	99.0783	94.2471
	0.73555	99.0279	101.385	100.355		97.7606	97.8098	96.211		96.0139	94.683	98.2913		98.9337	95.406	96.1039		99.5578	100.102	94.3243
	0.778767	96.8471	99.7527	100.071		95.5212	97.5962	95.9138		96.7095	95.2454	99.2621		96.9452	96.5278	95.3782		99.3219	98.5663	95.444
	0.822	97.1624	99.5054	100.461		97.1741	97.1688	95.8767		94.9706	95.8078	98.1748		96.2248	95.1389	94.4232		98.8208	99.3344	93.3591
	0.865233	98.2659	99.5549	101.348		95.2813	97.0085	94.8737		99.8127	92.9448	98.4466		96.3112	94.9252	95.3018		95.5483	101.331	93.5521
	0.908467	98.6863	100.593	101.17		96.161	96.7949	96.2853		94.275	93.3538	96.0388		97.147	93.6432	93.8885		97.4646	100.461	92.7027
	0.951717	97.3726	98.7636	100.993		95.7345	97.0085	94.7251		98.5286	94.9898	96.0388		96.9452	96.4209	94.6524		97.7005	98.5663	92.3938
	0.995183	98.5024	99.4065	98.7234		94.2682	95.7799	94.0193		94.9973	96.0634	95.9223		96.9741	94.1239	93.9649		95.5189	97.7471	91.5058
	1.03847	97.7404	100.099	98.0851		94.0283	96.4209	94.9851		95.1311	92.4335	97.0874		95.8501	95.0321	94.4232		96.4623	99.8464	93.0888
	1.0817	97.2149	97.4777	100.39		93.2285	98.1303	95.0966		94.7833	94.5808	95.1845		95.1009	95.5662	94.0794		95.8137	99.3856	93.0116
	1.12493	96.6894	99.1098	98.8652		93.7617	97.8098	94.3536		93.9807	93.0982	96.2718		97.4352	94.6047	94.6906		96.2854	98.7711	92.9344
	1.16842	97.609	99.3076	98.227		94.5881	96.1538	93.9079		95.9069	93.6605	96.0388		97.2334	93.9103	92.5516		95.5483	100.256	92.0849
	1.21165	97.2675	98.4174	99.1489		95.2013	95.6731	94.7994		96.2547	92.9448	96.3883		97.0605	96.4744	93.4301		97.9953	99.5904	92.0463
	1.25488	96.7945	100.099	98.8652		94.828	96.4209	95.1709		95.0508	93.9162	95.0291		96.0519	95.1389	94.1176		95.6073	99.6928	91.8919
	1.2981	98.0032	98.912	97.8014		94.2949	97.5962	94.3908		95.4789	94.3252	96.6214		98.5014	95.6731	92.8953		96.2264	98.8223	91.6216
	1.34133	96.5055	99.6538	100.426		95.5212	95.2991	94.0193		95.0241	94.5808	95.8058		96.0807	95.2457	93.8503		93.8679	100.051	93.0888
	1.38457	95.9275	98.1207	100.957		94.7747	96.1004	92.8678		95.1846	91.9734	96.0388		96.196	95.5128	92.5516		95.0767	100.87	92.4324
	1.42803	96.6632	97.9723	98.4752		94.2415	95.6197	93.6107		94.1413	94.0184	95.6893		96.3977	94.6047	92.1314		97.612	99.0271	93.1274
	1.47128	95.9275	98.368	98.6525		93.8416	98.1838	93.425		96.2279	93.9162	97.5922		99.2219	93.9637	93.2391		95.6958	98.9247	90.6564
	1.51452	98.1608	98.9614	98.4043		93.4417	95.6197	92.3848		96.0407	92.9959	96.1942		94.6686	93.5363	93.7357		97.0224	97.491	91.9305
	1.55775	98.9228	100.049	100.957		94.2949	94.8718	95.5423		93.6865	93.2004	96.8544		95.389	94.3376	93.2391		97.0519	99.3344	91.6602
	1.60123	96.3479	96.8348	99.2553		93.9216	96.1004	95.1709		95.6126	94.9387	95.534		95.9366	93.6966	93.5065		97.1403	99.5904	92.8958
	1.64445	97.1361	97.6756	99.2553		94.1882	96.5812	94.5394		94.5425	94.9387	96.3883		96.7147	93.0556	92.3988		96.02	98.9759	92.0849
	1.68768	97.0047	97.8239	99.7163		94.1616	98.5043	95.1337		95.4789	94.0184	95.6117		99.683	93.0021	92.4752		96.8455	99.6416	91.1969
	1.73092	98.371	100.989	98.3333		95.8411	97.6496	93.8707		97.1643	93.047	95.1068		96.0231	93.8568	93.6975		96.1675	99.4368	92.2008
	1.77415	95.0867	101.286	101.489		95.4679	96.1004	94.6508		93.2049	92.229	96.5825		95.1585	94.0705	93.1245		97.2288	97.5934	91.5444
	1.81737	95.8749	99.6044	99.6809		95.6812	96.688	92.7192		94.9438	93.5072	95.8058		96.9164	93.4829	92.7044		97.1403	98.5151	91.583
	1.8606	95.8487	99.6538	100.39		94.6947	96.9551	95.7281		92.9642	92.3824	97.0874		95.5908	95.0321	93.0481		96.3738	99.8464	94.0541
	1.90383	96.0851	96.8843	99.0071		93.8683	94.8718	94.9108		96.8165	93.9162	96.8544		97.4352	94.3376	92.8571		94.546	98.9247	89.7297
	1.94707	94.5875	98.1701	98.3333		93.895	96.688	95.5052		99.7592	93.6605	95.068		98.0115	93.6432	92.1314		95.7842	99.232	91.7761
	1.99028	96.8208	98.368	98.0496		94.1616	96.4744	94.688		94.4088	93.9673	98.3301		97.5504	93.6966	93.0099		95.9906	100.102	93.2432
	2.03352	94.351	97.2799	97.695		95.8678	95.1923	93.6107		94.8368	94.9898	95.8058		97.3487	92.8419	91.482		95.3125	99.5904	91.4672
	2.07675	97.3726	97.1316	97.8014		94.8547	96.5278	94.0565		93.2584	91.6155	96.1165		96.6282	92.1474	91.9404		94.4281	98.9759	91.6216
	2.12022	95.8224	96.7854	98.4043		93.6817	95.7265	92.8678		95.4254	92.0245	96.1553		97.1182	94.1239	90.7181		94.3101	99.1807	90.3861
	2.16347	94.7977	97.3294	98.5106		93.9216	95.2991	92.5706		96.8165	93.1493	94.2524		94.928	93.109	93.1627		93.3962	96.7742	90.1158
	2.20668	95.1655	97.181	100.603		94.7481	95.8333	94.1679		92.6966	93.3538	97.7087		94.7839	93.109	92.8189		95.5189	97.4398	92.8571
	2.25018	95.402	98.0712	97.0567		94.5881	97.1154	94.1679		93.2049	92.7914	96.1942		94.4957	95.1389	92.7807		93.3373	99.5392	90.8108
	2.29342	96.2953	96.6864	98.2624		96.2943	95.4594	93.7964		95.8534	93.3027	95.068		97.4928	92.6816	91.9404		95.5483	99.5392	93.0502
	2.33663	94.9291	96.6864	97.695		93.5484	96.2607	94.3536		94.7566	91.0532	95.1068		97.6081	91.2927	90.8327		94.6344	99.1807	90.2317
	2.37987	93.773	97.725	98.4752		94.5081	96.1538	93.4621		96.1744	92.7914	95.7282		94.3228	91.9338	91.2911		96.8455	96.6718	89.2664
	2.42308	95.113	96.6864	96.5248		97.414	95.8868	93.7221		95.9337	93.2515	94.4466		95.4179	91.6132	91.7494		94.5755	98.9759	91.6602
	2.4665	96.0851	98.8131	97.3759		94.6681	94.4979	94.0936		93.4992	92.7403	94.6796		96.196	94.0171	90.4507		93.6321	98.1055	89.8069
	2.50972	98.1608	99.1098	99.2908		94.4815	95.8333	92.8678		96.87	92.4847	95.6117		95.6484	91.8803	94.3468		93.2488	98.3103	90.5792
	2.55295	94.5875	97.181	98.4043		93.7883	95.8868	93.9079		93.4189	91.2065	95.8835		95.245	93.4295	91.2529		93.9858	98.6175	89.4595
	2.59618	94.5612	97.3294	97.9078		94.7747	94.7115	95.1337		94.4623	92.0245	94.6796		94.928	92.2543	92.4752		94.1038	99.232	91.2355
	2.6394	95.6122	98.7141	96.6667		93.8416	95.0855	93.9822		94.6763	92.0757	95.0291		94.3804	93.4295	91.3293		91.9222	98.2079	89.6525
	2.6829	95.9275	98.269	96.773		93.815	95.8333	94.7623		93.847	90.8998	95.6117		95.879	92.2009	90.9091		92.8066	98.9247	92.9344
	2.72613	93.9569	98.2196	96.4184		94.908	94.1774	93.2764		93.9005	92.7403	96.8932		95.879	92.0406	90.5653		93.5731	96.0573	89.5753
	2.76937	95.7173	97.181	96.4894		93.0685	93.3226	93.7964		95.6126	91.7178	95.9612		94.7839	91.2393	90.9855		94.5165	97.2862	89.5367
	2.81258	93.6416	97.725	96.4184		94.4282	93.9103	91.9391		96.7362	89.4683	95.7282		94.6398	90.8654	90.6799		94.7818	97.3886	87.2973
	2.85582	94.9291	98.912	98.0142		93.4951	95.1923	93.1649		93.5527	92.8425	94.7184		95.4755	90.0107	90.7181		94.2807	96.467	88.3012
	2.89905	94.6138	97.5767	97.5532		93.5217	95.3526	93.7593		94.7833	91.9223	95.7282		93.6311	89.8504	91.482		93.6026	95.9037	88.8803
	2.94253	95.98	96.9832	96.0993		94.0016	93.3226	94.2422		92.7769	90.9509	94.6796		95.879	91.2927	90.8327		92.8361	96.5182	89.8456
	2.98578	95.2969	98.269	97.305		92.7486	94.765	92.4591		95.3719	90.184	96.6602		95.9942	89.4765	90.6417		94.6344	97.5422	90.8108
	3.029	94.1408	97.3788	95.8511		94.3215	94.0171	94.0565		92.6699	90.4908	94.1359		95.9942	89.6902	90.2597		95.4894	97.3374	88.9575
	3.07225	93.8781	97.4777	96.6667		95.148	94.1774	93.685		94.9706	91.002	94.2136		95.879	90.1175	91.7112		93.1309	97.2862	91.0425
	3.11545	95.8224	97.6756	97.4468		94.5081	94.0705	92.422		93.1782	91.1554	96.3495		93.9193	90.3846	91.482		94.6639	96.1598	90.0772
	3.15868	92.8534	98.4174	96.3475		93.815	94.6047	94.7623		93.6865	89.7239	94.7184		93.5447	89.797	91.1383		94.8408	96.6718	89.4981
	3.2019	95.1655	96.9337	97.7305		96.1877	93.2692	93.9822		94.061	89.1616	95.2621		94.9568	89.6368	91.3675		94.8703	96.0061	88.6486
	3.24513	96.164	96.9832	98.5461		94.1882	93.4295	92.4591		93.5259	89.2638	95.3786		94.8127	88.3547	89.3048		93.1014	96.3646	88.417
	3.28837	92.5644	97.181	97.305		92.8819	95.9936	94.3165		94.4355	90.0307	95.4175		94.2363	89.3697	92.3988		92.4528	97.5934	88.3012
	3.3316	93.3789	97.3788	98.0496		95.9744	96.3675	94.5022		94.3553	88.9571	94.6796		94.4669	90.2244	91.5966		93.0425	97.2862	88.6486
	3.37482	96.6106	99.7033	99.8936		93.6817	92.7885	92.0877		93.5795	90.2352	94.2913		95.4467	88.6752	90.1833		93.3667	96.211	87.6834
	3.41832	94.5875	96.8843	99.0071		92.2687	94.2842	92.422		93.2852	89.3661	95.4563		93.1988	89.4231	91.9404		94.0743	96.723	88.2239
	3.46153	94.6663	96.637	98.5106		93.9483	92.735	91.4933		92.0546	90.7975	93.4757		95.072	88.6752	89.8396		91.2441	96.723	89.5753
	3.50477	97.793	97.2305	98.9716		92.7486	93.9103	91.9762		93.5795	89.9284	94.4466		94.9856	91.0256	89.3048		92.7476	96.5182	88.2239
	3.54825	95.1918	97.8734	99.539		91.9222	94.2842	91.7162		94.6495	89.8262	94.5631		93.7752	88.8355	89.8396		92.0106	95.6989	87.9151
	3.5915	94.2985	95.9446	100.887		93.6017	92.5214	91.7533		93.4457	89.9284	94.3301		93.804	89.9038	90.3743		92.7476	97.2862	87.0656
	3.63473	94.5612	97.4283	97.9787		92.6953	94.0171	91.0847		92.9106	90.0307	94.1748		93.2565	89.5299	91.673		90.8019	96.723	86.7181
	3.67795	95.1393	97.6261	97.4468		93.7083	95.3526	90.416		94.9973	89.0593	94.2136		93.2565	89.3697	90.3743		91.7453	96.6206	87.9537
	3.72143	94.4824	96.6864	96.2766		94.0549	93.1624	90.1189		93.3387	90.3885	93.6699		95.389	89.156	89.3048		94.0743	95.1357	88.1081
	3.76493	95.4808	96.7854	98.7589		94.0016	93.5897	91.6419		94.0342	89.1104	94.0583		95.389	88.9423	90.0688		92.895	96.6718	88.0695
	3.8197	97.7404	96.3403	99.4681		94.2949	93.5897	91.5305		94.6763	89.7239	93.5922		93.4582	88.7286	88.6937		93.7205	97.0302	87.2587
	3.88635	97.2412	97.7745	97.1986		93.735	92.8419	91.7162		94.0075	89.0082	94.1359		95.7925	88.141	89.9542		92.9835	96.1598	88.1853
	3.95305	97.32	97.4777	98.8652		92.1088	92.4145	90.7132		93.3922	89.9796	94.6019		94.1787	88.9423	90.6799		92.0401	97.0302	86.0618
	4.0197	96.453	95.9941	96.9858		94.0016	94.3376	90.6389		93.5259	89.1104	93.3981		94.2939	88.8889	90.0306		91.7748	94.8797	87.8378
	4.08638	98.5812	95.6479	97.1631		94.4282	94.7115	90.4903		92.0278	89.2638	93.2039		93.6023	89.0491	89.1138		91.6274	97.6959	86.139
	4.15305	96.5843	96.1919	97.305		91.3623	93.109	90.416		95.8266	90.6953	92.9709		93.8905	88.6752	88.5027		91.7748	96.0573	87.027
	4.21972	95.98	97.0821	99.0426		94.4282	93.0021	92.7935		93.0177	89.6728	92.4272		95.7637	87.8739	88.5409		93.9858	97.491	85.9846
	4.28638	96.4004	96.637	96.7021		93.4151	91.6132	89.8588		90.5564	88.9059	94.5631		92.6801	89.156	88.5027		91.6863	97.4398	86.2162
	4.35305	96.164	95.8952	96.6312		92.402	92.3077	91.4933		92.4826	87.9857	92.3107		95.4755	86.859	88.5027		91.3031	96.8766	87.1429
	4.4197	97.4251	96.1919	97.9787		90.8025	94.9786	90.0074		93.0177	89.2127	93.4369		94.7839	88.7286	87.9297		93.2783	97.2862	85.4054
	4.48638	95.7961	95.0544	98.156		91.8422	92.6816	89.2645		92.7501	87.8323	93.3981		91.8444	87.7671	89.0756		92.6002	96.0573	87.0656
	4.55305	98.3973	96.2413	96.5603		90.5892	91.7201	91.7162		91.3323	89.7751	91.301		94.8991	89.3697	88.961		92.0991	96.5182	85.8301
	4.6197	95.9012	95.549	97.0567		92.6953	93.3226	91.5305		90.0482	88.0368	91.8058		92.0461	89.3162	88.0061		90.0059	97.5422	85.9073
	4.68638	95.402	95.549	97.4823		90.136	93.6966	91.3076		90.61	90.0818	91.6893		93.5159	88.8889	87.6241		90.0059	96.979	86.2162
	4.75305	95.2706	95.7962	97.5177		90.3226	94.0171	90.9733		92.9909	88.0879	92		92.3631	88.5684	88.5791		88.8561	97.4398	86.139
	4.81972	97.0047	97.5272	97.0922		90.8558	93.9637	91.679		91.6265	88.8037	93.9029		91.9885	87.3932	88.7319		89.77	94.5212	85.3282
	4.88637	94.6138	95.8952	95.9929		90.8025	93.5363	89.5245		92.0278	88.6503	92.8155		93.17	88.4081	90.0306		91.1262	96.2622	87.4517
	4.95305	96.2165	93.6696	97.5532		91.6822	92.8953	90.7132		90.1284	89.9796	93.2427		93.1412	87.9274	87.5859		90.3302	96.3646	86.7568
	5.01973	95.6385	95.549	96.844		91.229	92.5748	91.8648		91.8406	87.5256	91.6117		93.5447	86.0577	87.7005		89.6521	96.4158	87.1042
	5.08638	94.4298	95.4995	96.9504		91.7355	93.6432	91.159		90.9845	88.8037	93.0097		94.4669	88.0876	87.7005		91.9811	97.3374	85.7143
	5.15305	95.3232	93.7685	96.3121		91.0157	92.0406	90.6018		91.9208	87.8834	93.7864		93.3429	86.4316	88.5027		87.8833	95.4429	85.7143
	5.21958	94.7977	95.0544	96.7376		92.2421	93.6966	90.3789		90.9845	88.4969	91.5728		93.1988	88.3013	88.6555		91.8632	95.3405	86.2548
	5.28625	95.4283	95.3511	95.3901		92.482	93.3761	91.4933		91.466	89.4683	91.5728		92.6801	88.5684	87.9297		89.4458	96.0061	85.9846
	5.35292	95.5334	95.6973	97.3404		90.2159	94.7115	91.7533		90.7972	88.0368	92.8544		94.2075	87.5	88.0443		91.2736	95.6477	84.8649
	5.41957	95.7698	96.9832	96.4539		90.3226	93.4295	90.899		89.6201	87.6789	94.7184		92.9107	87.7137	87.8915		91.1262	95.1357	84.2471
	5.48623	93.9832	96.8843	96.3121		92.3487	93.3761	91.9762		92.4826	87.5767	92		91.5562	88.7821	87.9679		89.4752	96.723	85.7143
	5.5529	95.0604	96.3403	95.7092		90.8025	92.3077	90.899		91.0112	87.1677	90.9126		89.7695	87.5534	88.3499		89.9764	95.5965	84.8263
	5.61983	95.98	96.2908	97.6241		91.2023	94.7115	89.1902		90.717	90.2352	92		92.7954	86.5919	88.5027		88.0307	95.8013	85.2124
	5.6865	94.0357	95.2522	96.3121		92.2687	91.7201	88.4844		91.5998	87.4233	91.2233		94.0922	87.3932	86.5928		89.3868	96.8766	84.4788
	5.75317	96.7683	94.4609	96.9149		91.5489	93.6966	92.1991		90.5564	88.5992	95.3398		90.7781	87.7671	87.2804		89.6521	96.4158	83.3591
	5.81983	94.6926	95.6479	94.7872		92.1354	93.9637	88.893		90.4762	86.5031	91.9223		91.268	87.5	86.7838		88.8561	96.5182	85.6371
	5.8865	95.3494	95.8952	96.383		92.322	93.6432	90.0817		92.4559	87.0143	92.7767		91.2968	86.8056	87.7005		87.8243	96.1086	84.3243
	5.95317	92.8797	95.9446	97.0213		91.5489	93.8568	90.899		92.5896	88.6503	90.4854		93.0836	86.5919	89.152		90.0354	95.3405	83.4749
	6.0196	97.0047	94.8071	95.0709		91.4689	94.3376	91.419		90.717	87.3722	92.1165		90.0576	87.3397	87.0512		88.9446	95.5965	85.7529
	6.08653	93.5102	97.1316	95.2128		91.7355	94.0171	92.1248		93.2852	87.1677	92		91.4697	87.8739	88.8083		88.7087	95.3917	84.4015
	6.1532	93.484	95.3511	96.6312		91.7089	92.2009	91.6419		88.9781	88.7014	92.699		93.7752	87.4466	86.4018		88.8267	96.5694	84.6332
	6.2196	95.1393	95.4006	96.5603		92.1088	93.4295	91.7533		90.4494	87.0143	91.1068		91.4697	88.7821	87.3568		89.6816	97.5422	85.2896
	6.28627	94.5087	94.8566	94.3262		91.6822	92.4145	90.3789		92.1883	87.7301	92.3107		90.0288	87.2863	89.343		86.9104	96.5694	84.4015
	6.35293	94.1934	96.1919	95.4965		92.5353	94.0705	89.7845		91.145	88.1391	92.233		91.9597	86.6453	87.3568		88.5908	97.3374	84.4015
	6.4196	93.5102	95.4006	95.9929		92.3754	92.2543	91.8648		90.9042	88.9571	91.534		94.3516	84.8291	86.3254		88.5318	96.1086	84.0541
	6.48627	92.9059	94.6093	96.2411		92.642	91.7735	89.4874		89.1118	85.0716	92.3495		91.7867	86.4316	86.7456		87.4116	94.6237	85.6371
	6.5532	93.9832	94.4609	97.1986		90.8025	92.8419	91.2333		91.4928	86.0941	91.8835		92.7378	86.1111	88.3499		87.7358	95.2381	84.9421
	6.61987	92.5906	95.3017	96.0638		90.7225	92.4679	89.4874		91.2788	85.3783	92.932		92.219	87.1795	87.013		87.7358	96.7742	85.2124
	6.68653	91.8812	94.1642	95.7447		90.1093	93.3761	90.9733		90.1284	85.6851	91.534		90.7781	86.8056	87.5859		88.1191	95.5965	82.8958
	6.7532	93.5365	93.818	95		91.069	92.4145	93.3507		91.4393	88.2413	91.0291		94.121	86.7521	85.8289		87.6179	97.0302	83.0116
	6.81987	92.3542	95.1039	94.1844		92.0288	91.7735	89.5245		91.2253	87.9857	91.6893		91.7003	86.0043	87.8915		88.5024	96.0573	83.7452
	6.88653	93.5365	93.5213	96.1702		90.6958	91.6667	89.6731		90.717	86.7076	92		90.634	86.3782	87.1658		86.9988	94.8285	83.5135
	6.9532	92.4593	93.8675	96.3121		93.8416	91.9872	88.2615		88.122	86.8609	91.8447		91.7579	86.3248	86.249		87.7064	95.1357	85.9073
	7.01987	94.64	94.906	95.3191		91.3356	91.7735	90.1932		91.0915	87.1166	91.301		91.902	85.1496	87.5477		87.9127	97.5422	83.5907
	7.08653	95.1918	94.6588	95.461		91.4423	93.1624	90.1932		93.74	86.9121	91.8058		90.2882	86.6453	87.6241		88.6792	95.0845	83.3205
	7.1532	93.3526	93.8675	94.7163		91.2823	91.6132	90.6389		88.7908	86.4519	92.5437		91.1527	86.2714	86.822		88.3255	95.8013	84.0927
	7.21985	93.0373	93.8675	93.227		90.0826	91.6667	91.6419		91.038	89.4172	91.4951		90.4899	87.4466	87.2804		85.2594	97.491	83.6293
	7.28653	92.5118	94.5598	94.7163		91.8155	92.8953	90.6018		89.5666	88.2413	90.4854		91.2104	86.2714	85.9817		87.3821	96.5694	82.0463
	7.35318	95.0342	94.362	95.8156		89.8427	93.1624	90.4903		91.145	88.0879	90.9126		91.3545	86.485	86.9366		88.0896	96.3134	83.6293
	7.41987	93.1424	94.8566	95.4965		90.6692	91.9338	90.5646		90.3424	87.4233	92.8544		91.8156	86.4316	85.7143		86.0554	94.8285	84.1313
	7.48653	92.4067	96.093	99.078		92.0021	91.1325	88.8559		90.7705	87.4233	90.7184		88.9625	84.8291	85.7525		87.0578	96.467	81.3514
	7.5532	93.0373	94.2136	96.1348		91.8422	92.1474	88.8187		92.9642	86.9121	91.8058		91.9308	86.0577	86.0581		86.0554	94.47	82.8958
	7.61985	93.6942	96.0435	95.3546		92.482	92.4679	88.9302		91.8673	87.5256	90.4854		92.3919	85.7906	86.1727		86.7925	95.4429	81.7761
	7.68652	93.6679	94.5598	93.8652		91.3623	92.7885	90.156		89.8609	86.1963	90.9126		91.3256	87.2329	84.7976		85.112	95.2893	83.4363
	7.7532	93.8518	93.818	95.922		90.9358	92.2543	89.4131		90.1017	85.9918	91.9223		89.7983	85.203	87.9297		87.3526	95.5965	82.1236
	7.81985	94.1934	93.818	95.7801		89.2829	93.109	89.8217		91.7335	86.8609	92.1165		90.9222	86.1111	85.9817		84.7583	94.3676	83.1274
	7.88652	90.2522	94.8071	94.0071		91.4689	93.1624	88.4844		92.7234	86.6564	90.3689		94.8703	85.7372	86.3254		86.5861	96.8254	83.3977
	7.95308	93.9044	93.1751	95.4255		90.5359	91.1325	90.8618		89.4864	88.9059	92.233		89.7406	86.0043	85.7907		85.0236	96.211	81.2741
	8.01975	93.5891	94.3126	93.7589		89.6028	93.1624	88.9302		88.6035	86.8098	91.5728		89.683	84.6688	86.2872		86.2323	94.5725	83.5135
	8.08647	92.8534	92.6805	96.0284		90.1093	92.3611	90.6761		89.4061	85.1227	90.2913		91.1816	84.6688	86.2108		85.0236	95.1357	83.0888
	8.15312	93.0899	94.1642	94.539		89.8427	91.7201	88.5215		91.3858	85.7362	91.6505		91.2392	85.844	87.395		86.2028	95.4941	82.0463
	8.2198	92.9585	94.2631	93.5816		90.2426	92.2009	89.9331		93.0444	85.3272	91.534		90.2882	85.7372	86.0581		86.3797	94.4188	82.8185
	8.28647	95.3757	94.6093	93.9716		90.1626	91.7735	88.4473		92.1616	85.9918	89.9417		90.5764	85.7906	87.4332		85.5248	95.9549	83.0888
	8.35312	94.062	94.0653	95.9574		91.229	93.3226	89.3759		91.0112	86.2474	92.932		91.6427	84.7756	84.7976		85.0236	93.0876	82.5483
	8.41978	92.2228	94.362	95.2837		91.069	93.0556	89.3759		88.8443	86.1452	92.2718		88.3285	85.4167	85.4087		87.3526	95.4941	82.3938
	8.48645	91.9601	94.0158	94.1135		90.5359	90.9722	88.893		89.7271	85.6339	92.4272		90.5187	84.562	85.4851		86.1733	94.8797	83.3977
	8.55313	92.2754	94.9555	94.9645		91.0957	91.3462	90.2675		88.9781	85.5828	90.9515		89.683	85.3098	87.0894		86.2323	94.8797	82.4324
	8.61978	92.9585	94.0653	94.2553		91.4689	90.3312	88.9302		90.4762	86.2474	91.068		90.1729	86.3782	86.8602		84.5814	93.702	82.3552
	8.68647	95.0604	93.1751	94.2199		91.9755	92.6816	90.3046		92.1348	87.5767	88.7767		89.4236	85.4701	85.9435		84.5224	94.0092	82.8958
	8.75313	92.6432	92.9773	92.695		91.5489	90.9722	90.416		89.9679	86.1452	94.4078		88.2421	84.9893	85.7143		87.1462	94.7261	83.0888
	8.8198	95.5859	95.0049	92.3404		90.5092	92.1474	88.7073		91.145	86.0429	90.6796		90.1153	83.1731	84.683		85.6427	95.7501	81.9305
	8.88647	94.2985	93.9664	94.9645		92.3754	91.6132	89.1159		89.2456	85.4806	91.2621		88.4438	84.9893	84.8739		84.9646	94.8797	81.2741
	8.95312	92.7746	94.6588	95.2482		92.322	92.0406	90.416		89.3526	85.4806	93.1262		89.7118	86.0043	85.6379		86.0554	95.7501	82.3552
	9.0198	91.4083	95.2028	92.5177		91.2557	90.812	88.5215		89.8609	87.6789	91.1845		91.0086	84.9893	84.7594		86.0849	93.9068	81.0811
	9.08645	92.7746	93.7191	91.9504		92.1088	93.3761	90.0817		91.1182	85.1738	91.5728		89.8271	84.6688	84.2628		83.2252	94.1116	82.3938
	9.15312	93.6942	94.7082	92.6596		89.7094	91.3996	89.3759		91.0112	85.8896	91.2233		90.6052	84.7222	84.7212		84.7877	95.1357	81.7375
	9.21978	91.3558	94.1642	95.3901		90.9891	92.2543	88.1501		90.0482	85.4806	90.4854		90.7205	83.6004	86.0581		85.2889	94.9309	81.6216
	9.28645	91.5397	93.4718	93.8652		91.069	90.9188	92.4591		88.7105	85.0716	91.0291		91.6427	84.2949	84.9121		84.4045	96.979	81.5444
	9.35332	90.7777	94.4115	94.4681		90.0826	93.0556	88.5958		88.4965	86.4008	92.3495		90.8357	84.2949	86.8602		84.0802	94.8797	82.0849
	9.41998	94.8502	93.8675	92.5177		89.896	91.1859	87.8529		89.8341	86.1452	91.3398		91.7867	86.3782	84.7594		85.3184	94.8797	81.0039
	9.48663	92.8271	94.4115	94.0426		89.6828	92.4145	87.89		89.6201	86.2986	90.2913		88.8473	84.5085	84.8739		84.5224	94.0604	82.1236
	9.55332	93.3789	94.8071	94.539		89.5228	93.4829	90.2303		89.7271	85.5317	90.4854		87.6081	84.7756	87.7005		83.5495	93.9068	82.3552
	11.2491	97.32	87.2404	117.057		10.3172	9.40171	13.2615		21.1075	15.6953	26.0971		40.8646	31.7842	37.7769		47.5825	23.2463	54.2471
	11.2924	95.7961	88.9219	117.837		9.41082	8.44017	12.0728		19.9839	13.9059	24.8544		38.732	31.0897	35.6761		46.7571	21.8126	51.8919
	11.3356	96.164	87.7349	117.305		8.87763	7.90598	11.4042		18.4323	13.3947	23.0291		37.147	28.7393	34.5302		46.5212	20.4301	49.2278
	11.3788	95.3494	89.0702	118.262		7.97121	6.83761	10.5869		17.2285	12.1677	20.8932		36.5994	26.7628	32.4293		44.6344	19.15	48.3784
	11.4221	100.473	89.2186	118.404		7.54465	6.41026	9.76969		16.3724	11.6564	20.0777		35.1585	25.1068	30.9015		42.6002	17.5115	47.4903
	11.4656	97.1624	88.3284	118.546		6.95814	5.76923	9.28678		15.1685	10.7873	18.1359		33.9193	24.7329	29.7555		43.0425	17.1019	45.4054
	11.5088	95.2444	87.8338	118.156		6.79819	5.44872	8.39525		14.259	10.3272	17.4757		33.17	23.8248	29.1444		41.2146	16.1802	44.2471
	11.552	97.2675	88.0811	119.61		6.29166	4.86111	8.24666		13.6704	9.9182	16.5437		32.1326	22.8098	27.5783		40.8903	15.6682	44.1699
	11.5953	95.9012	88.4273	118.191		5.94508	4.70085	7.76374		12.9749	9.45808	15.3398		31.9885	21.4209	26.1268		39.3868	15.2586	44.4015
	11.6387	96.1902	89.367	119.007		5.65183	4.43376	7.28083		12.1723	8.64008	14.9126		30.4323	21.3141	25.4393		40.0943	14.4905	40.2703
	11.682	96.269	88.8229	119.965		5.35857	4.11325	6.79792		12.0385	8.28221	13.7864		30	20.1923	24.3697		37.441	13.3129	39.7683
	11.7252	95.1393	89.2186	118.121		5.09198	4.16667	6.57504		11.0219	7.97546	12.6602		28.6744	19.5513	23.5676		36.9399	12.6984	39.6139
	11.7684	95.7961	86.3501	119.362		4.85204	3.84615	6.12927		10.0321	7.56646	11.8835		28.5591	19.0705	22.9947		37.3526	12.6472	37.8378
	11.8117	97.0573	87.8338	117.979		4.63876	3.4188	5.98068		9.95185	7.05521	11.6505		27.3775	18.2158	21.9251		35.8785	12.0328	37.529
	11.8549	96.3216	88.0811	119.043		4.37217	3.52564	5.60921		9.68432	6.33947	11.1068		27.6945	18.0021	21.696		36.8219	11.2135	37.1815
	11.8984	98.9753	89.8615	118.121		4.02559	3.36538	5.8321		9.01552	6.18609	10.0971		26.6571	17.5748	20.3209		35.1415	10.8551	35.9846
	11.9416	95.7961	89.1197	117.092		3.97227	3.09829	5.34918		8.61423	5.93047	9.74757		25.3602	16.9872	19.7861		34.5814	10.5479	34.2857
	11.9851	98.3184	88.4768	119.894		3.86564	3.25855	5.05201		8.07919	5.5726	9.43689		25.4179	16.1325	18.793		33.9033	10.2407	34.2471
	12.0283	96.3216	88.3284	118.865		3.70568	2.99145	4.94056		7.78491	5.31697	8.97087		24.8127	15.7051	18.1818		33.8738	9.67742	33.7066
	12.0715	96.1902	89.367	117.695		3.54572	3.15171	4.75483		7.54414	5.01022	8.42718		24.5821	15.1709	18.0672		32.8125	9.16539	33.5907
	12.1149	97.6616	88.5262	116.277		3.41242	2.8312	4.53195		7.14286	4.70348	8.31068		23.0836	14.797	16.7685		32.4587	9.06298	33.2046
	12.1582	98.7651	88.2789	118.901		3.3591	2.61752	4.64339		6.82183	4.49898	7.68932		22.8818	14.4765	16.5393		32.4882	8.44854	31.0039
	12.2014	97.2937	86.6469	116.809		3.17249	2.72436	4.27192		6.58106	4.7546	7.41748		21.6427	14.3162	16.0428		30.6899	8.34613	31.3127
	12.2446	95.0079	88.0317	116.241		3.22581	2.67094	4.08618		6.39379	4.39673	7.14563		21.8732	13.8355	15.4698		31.2205	7.8341	31.4286
	12.2879	96.5055	88.0811	118.121		3.01253	2.40385	4.27192		6.12627	4.19223	7.18447		21.0086	13.3013	14.8969		30.3656	7.57808	30.3475
	12.3311	95.2181	87.3887	118.44		2.90589	2.67094	3.97474		5.72499	3.93661	6.75728		20.7781	13.141	14.5913		29.8939	7.42448	29.8842
	12.3743	97.5565	86.8942	116.028		2.90589	2.61752	4.01189		5.72499	3.83436	6.52427		20.3746	12.9274	14.2093		29.2158	7.21966	29.6139
	12.4176	97.1886	88.2789	118.936		2.90589	2.35043	3.90045		5.53772	3.57873	6.4466		20.1441	11.9124	13.751		29.5696	6.91244	29.6139
	12.4608	95.691	88.9713	117.057		2.74593	2.45726	3.75186		5.16319	3.62986	6.01942		19.6254	12.0726	13.2544		29.7465	6.75883	28.6873
	12.504	97.9506	87.7844	116.631		2.71927	2.29701	3.75186		5.18994	3.57873	5.82524		18.8761	11.5919	13.0252		28.7736	6.65643	27.8764
	12.5473	97.0573	88.0317	117.128		2.58598	2.29701	3.82615		5.00268	3.11861	5.63107		19.049	11.3782	12.9106		28.4198	6.04199	27.6448
	12.5905	96.269	86.3007	116.95		2.45268	2.51068	3.64042		4.7619	3.32311	5.28155		19.0778	11.2714	12.3759		28.5377	6.09319	27.1815
	12.6337	95.6647	87.4382	121.17		2.47934	2.24359	3.60327		4.6549	2.96524	5.24272		18.3573	10.9509	12.5668		27.9776	5.83717	26.9884
	12.6769	96.0326	86.3996	116.028		2.45268	2.13675	3.49183		4.60139	2.81186	5.08738		17.5216	10.6838	11.9557		28.0366	5.63236	26.5251
	12.7202	98.2922	86.7953	119.007		2.31938	2.13675	3.34324		4.54789	2.96524	5.08738		17.6945	10.5769	11.8029		27.27	5.27394	25.9073
	12.7634	98.2659	87.8338	117.979		2.39936	2.13675	3.67756		4.22686	2.70961	4.85437		17.3487	10.5769	11.1536		26.6215	5.12033	25.251
	12.8066	97.6616	87.4382	119.22		2.39936	2.19017	3.34324		4.1466	2.70961	4.62136		17.0317	9.9359	11.1917		27.0342	4.96672	24.4015
	12.8499	96.8734	87.5371	116.702		2.31938	1.9765	3.30609		4.03959	2.70961	4.58252		16.8588	10.0427	10.5806		26.7689	5.01792	24.1313
	12.8931	94.8502	85.6083	120.532		2.29272	2.02991	3.38039		3.87908	2.76074	4.66019		15.9366	9.77564	10.5042		25.9434	4.50589	23.8224
	12.9363	95.4545	85.7072	120.213		2.21274	2.13675	3.19465		3.82558	2.40286	4.34951		15.8213	9.77564	10.1986		26.0318	4.7107	23.8996
	12.9795	95.3757	86.3996	118.901		2.2394	1.86966	3.19465		3.61156	2.45399	3.8835		15.5908	9.45513	9.62567		25.2064	4.45469	22.8958
	13.023	97.5828	85.4105	118.794		2.26606	1.76282	3.04606		3.69181	2.40286	3.76699		15.3314	9.45513	9.62567		25.059	4.50589	22.2394
	13.0663	95.7961	86.548	118.475		2.18608	1.86966	3.19465		3.42429	2.30061	3.8835		14.7262	9.02778	9.1673		25.796	4.14747	21.6602
	13.1097	93.9044	86.0534	118.262		2.07945	2.13675	2.93462		3.31728	2.40286	3.57282		14.6398	8.65385	8.93812		24.6757	4.09626	21.2741
	13.153	94.0883	84.817	119.043		2.13276	1.92308	3.00892		3.42429	2.19836	3.41748		14.3228	8.60043	8.55615		24.4693	4.04506	20.3861
	13.1962	96.1377	86.2512	120.142		2.10611	1.76282	3.00892		3.34403	1.99387	3.26214		14.0346	8.33333	8.40336		23.9682	3.89145	20.1544
	13.2394	95.6647	86.1029	118.333		2.13276	2.08333	2.82318		3.10326	2.04499	3.1068		13.8329	8.33333	8.02139		23.9387	3.78904	19.9614
	13.2827	94.9291	84.9159	117.908		1.99947	1.76282	2.97177		2.9695	2.04499	3.14563		13.6311	7.63889	8.09778		23.9682	3.89145	19.8456
	13.3261	94.824	86.2018	119.787		1.99947	1.81624	2.82318		2.9695	1.84049	3.06796		13.7752	7.90598	7.52483		23.8797	3.63543	18.8803
	13.3694	94.1408	85.4105	117.518		2.05279	1.81624	2.63744		3.02301	2.09611	2.75728		13.804	7.31838	7.18105		23.4965	3.53303	19.1506
	13.4126	95.2444	87.4876	119.078		1.99947	1.76282	2.74889		2.78224	2.04499	2.60194		13.1412	7.53205	7.06646		22.612	3.48182	18.3012
	13.4558	94.6926	86.3996	118.369		1.99947	1.86966	2.74889		2.75548	1.78937	2.60194		12.7954	7.37179	6.79908		23.0542	3.48182	17.722
	13.4991	97.5565	86.004	118.085		1.91949	1.76282	2.63744		2.75548	1.73824	2.60194		12.3055	7.21154	6.68449		22.7594	3.22581	18.1467
	13.5423	94.7714	85.361	118.83		1.86617	1.81624	2.71174		2.59497	1.73824	2.52427		12.4496	6.89103	6.5317		22.8479	3.32821	17.027
	13.5855	93.3001	86.4985	120.248		1.99947	1.81624	2.56315		2.62172	1.63599	2.56311		12.219	6.78419	6.41711		21.9929	3.02099	16.9498
	13.6287	93.3526	84.6192	116.56		1.78619	1.81624	2.6003		2.48796	1.84049	2.40777		12.2767	6.89103	6.07334		22.1993	3.02099	16.6795
	Raw Data	4526	2389	4106		4403	2233	4076		4469	2299	3998		4459	2251	4006		4500	2228	4021
		4466	2373	4091		4377	2250	3900		4357	2306	3949		4416	2277	3950		4387	2241	3937
		4433	2358	4032		4510	2231	3939		4391	2272	3984		4438	2264	3911		4443	2219	3877
		4449	2357	3998		4341	2224	3953		4399	2245	3904		4384	2293	3938		4336	2229	3856
		4462	2339	4066		4315	2209	3998		4369	2247	3861		4371	2231	3891		4347	2231	3880
		4333	2333	4012		4263	2204	3884		4359	2245	3847		4486	2251	3917		4248	2232	3856
		4335	2305	4067		4275	2164	3893		4290	2221	3826		4371	2245	3892		4310	2234	3916
		4422	2337	4049		4364	2173	3924		4337	2231	3867		4370	2256	3880		4342	2217	3825
		4347	2331	4018		4268	2216	3861		4273	2219	3831		4318	2228	3817		4325	2188	3905
		4318	2302	3949		4195	2151	3889		4292	2232	3787		4288	2209	3904		4268	2201	3859
		4366	2329	3994		4186	2168	3815		4241	2180	3784		4383	2239	3891		4296	2207	3779
		4313	2304	4021		4266	2178	3849		4259	2227	3849		4286	2216	3794		4245	2195	3786
		4276	2309	3987		4207	2162	3865		4269	2184	3758		4318	2229	3762		4224	2175	3780
		4271	2317	3922		4157	2148	3846		4187	2165	3784		4330	2225	3814		4252	2174	3806
		4250	2253	3975		4157	2168	3777		4246	2190	3723		4196	2190	3734		4180	2178	3704
		4254	2291	3941		4150	2179	3860		4206	2168	3698		4255	2214	3713		4207	2172	3713
		4293	2276	3938		4156	2119	3847		4226	2178	3752		4210	2208	3761		4178	2176	3660
		4287	2299	3875		4170	2119	3792		4141	2137	3668		4260	2192	3714		4156	2138	3715
		4268	2289	3961		4176	2136	3753		4213	2169	3730		4188	2178	3724		4133	2153	3719
		4269	2258	3880		4126	2121	3704		4201	2147	3675		4185	2166	3658		4252	2125	3698
		4284	2250	3887		4187	2101	3666		4222	2131	3671		4260	2169	3691		4233	2136	3671
		4213	2268	3915		4155	2112	3749		4160	2125	3696		4182	2177	3703		4282	2134	3691
		4243	2264	3905		4219	2126	3773		4179	2108	3668		4178	2184	3701		4211	2113	3664
		4263	2233	3895		4246	2122	3705		4204	2153	3687		4224	2191	3670		4204	2110	3703
		4239	2216	3907		4086	2099	3698		4165	2119	3736		4133	2129	3689		4167	2166	3726
		4269	2274	3880		4192	2107	3727		4106	2116	3662		4178	2120	3660		4090	2137	3673
		4180	2229	3852		4225	2121	3745		4172	2138	3627		4208	2131	3621		4155	2129	3668
		4255	2243	3861		4037	2121	3649		4136	2119	3638		4233	2138	3714		4085	2110	3609
		4301	2231	3803		4094	2080	3667		4124	2105	3681		4113	2148	3634		4253	2134	3607
		4255	2246	3829		4075	2091	3658		4161	2104	3651		4180	2110	3664		4196	2077	3636
		4197	2235	3804		4115	2039	3692		4159	2081	3594		4270	2147	3672		4178	2098	3661
		4260	2219	3816		4138	2089	3648		4141	2114	3584		4146	2131	3620		4073	2097	3616
		4206	2222	3764		4130	2079	3686		4066	2105	3588		4163	2096	3596		4116	2096	3650
		4189	2233	3812		4096	2109	3656		4173	2076	3606		4182	2117	3600		4217	2105	3666
		4228	2205	3832		4073	2080	3622		4068	2065	3636		4164	2092	3601		4138	2057	3622
		4208	2224	3779		4056	2058	3610		4174	2064	3600		4204	2089	3636		4157	2116	3619
		4161	2191	3749		4100	2064	3647		4082	2055	3659		4178	2097	3586		4129	2087	3591
		4120	2212	3770		4060	2033	3630		4074	2080	3695		4088	2057	3630		4115	2085	3636
		4122	2186	3788		4074	2068	3611		4133	2102	3603		4088	2121	3658		4137	2077	3625
		4143	2170	3742		4144	2083	3618		4109	2050	3627		4132	2074	3588		4229	2124	3605
		4212	2218	3739		4056	2086	3603		4197	2072	3609		4143	2089	3638		4096	2082	3588
		4170	2207	3765		4046	2043	3584		4125	2071	3609		4134	2123	3492		4086	2063	3598
		4114	2197	3750		4124	2054	3636		4113	2074	3627		4117	2121	3631		4117	2082	3554
		4190	2182	3804		4088	2073	3578		4109	2020	3554		4104	2060	3498		4123	2064	3629
		4090	2183	3716		4086	2038	3603		4144	2089	3530		4108	2082	3578		4130	2056	3574
		4158	2169	3660		4091	2068	3560		4098	2054	3541		4132	2055	3498		4092	2053	3586
		4186	2175	3754		4113	2055	3646		4015	2082	3544		4088	2056	3529		4067	2066	3524
		4140	2179	3715		4070	2048	3537		4115	2040	3551		4094	2080	3632		4035	2065	3589
		4113	2152	3661		4054	2045	3636		4090	2049	3526		4079	2052	3512		4104	2068	3590
		4154	2168	3744		4117	2027	3555		4065	2058	3553		4177	2068	3487		4161	2040	3502
		4138	2168	3689		4034	2044	3520		4074	2014	3544		4047	2050	3512		4110	2035	3529
		4184	2188	3699		4132	2094	3557		4059	2044	3610		4118	2093	3554		4068	2045	3585
		4111	2169	3672		4087	2069	3553		4132	2055	3585		4169	2089	3531		4108	2064	3489
		4124	2164	3692		4151	2042	3603		4170	2041	3589		4096	2037	3507		4079	2056	3616
		4015	2156	3700		4101	2023	3562		4058	2008	3476		4105	2042	3463		4089	2022	3560
		4120	2143	3636		3971	2026	3609		4096	2041	3423		4062	2020	3440		4126	2036	3488
		4129	2147	3686		4031	2034	3545		3994	2016	3504		4084	2017	3494		4210	2005	3470
		4075	2140	3699		4116	2020	3515		4038	2005	3510		4052	2052	3453		4118	2018	3479
		4057	2144	3709		4028	2011	3572		4018	1969	3515		4105	2020	3468		4034	2058	3484
		4165	2153	3629		4113	2026	3603		4050	2006	3514		4181	2060	3470		4143	2024	3456
		4163	2158	3671		4046	2075	3495		4052	2050	3478		4132	2044	3571		4175	2026	3655
		4034	2160	3649		4033	1985	3634		4091	1991	3579		4118	2023	3477		4025	2012	3516
		4099	2145	3735		4124	1985	3542		4118	2025	3490		4096	2015	3451		4076	2021	3539
		4090	2128	3639		3980	2005	3502		3988	1999	3479		4068	2038	3480		4163	2036	3465
		4162	2141	3651		4012	2009	3516		4016	2020	3440		4068	2043	3413		4037	2009	3494
		4030	2154	3687		3964	2014	3466		4096	1984	3440		3973	2033	3410		4146	1980	3490
		4052	2113	3632		4041	1999	3594		4054	2026	3476		3996	2043	3445		4102	2008	3480
		4040	2154	3640		3997	2011	3573		4085	1964	3513		4083	2006	3472		4032	2017	3491
		4073	2149	3697		4037	2002	3521		4038	2022	3478		4020	2009	3474		4110	2016	3432
		4087	2124	3684		4025	1995	3481		4033	2011	3466		4110	2013	3417		4090	2006	3528
		4062	2139	3613		4038	1987	3485		3949	2013	3492		4051	1996	3461		4054	2018	3528
		4074	2162	3681		3975	1991	3484		4026	1970	3456		4056	2006	3509		4003	2013	3541
		4059	2088	3646		3938	1988	3512		4035	1999	3449		4085	2018	3456		4096	2009	3411
		4010	2092	3652		4044	1969	3487		4029	1962	3465		4019	2003	3462		4073	1992	3437
		3969	2114	3656		4093	1987	3493		3977	2006	3442		4021	2002	3437		4039	1990	3516
		3967	2089	3608		4033	1931	3514		3995	1970	3466		4023	1981	3407		4115	2013	3531
		3989	2145	3590		4024	1981	3488		4092	1989	3518		4089	2030	3385		4018	1995	3560
		4090	2120	3660		4025	1980	3550		3958	1999	3400		4072	1978	3472		4078	2015	3463
		3965	2064	3673		3999	1979	3505		4056	1960	3416		3989	2003	3475		4109	2013	3458
		4033	2130	3637		4017	2000	3489		4022	2014	3446		4045	1987	3412		4067	1977	3499
		3914	2103	3627		4044	1981	3462		4064	1981	3483		4062	1966	3415		3975	2014	3435
		3989	2057	3594		3975	2000	3475		4109	1990	3377		4024	1965	3387		4029	1965	3416
		4012	2098	3616		4037	1980	3475		3978	1984	3479		4025	1980	3465		4122	1982	3504
		3948	2078	3597		4035	1974	3384		3982	2001	3386		4054	1968	3378		4028	1980	3465
		3972	2109	3660		3923	2003	3517		4025	1960	3425		4016	2024	3436		4056	1968	3425
		3981	2096	3588		3942	1945	3416		3958	1955	3440		4036	1976	3372		3916	1996	3449
		4005	2075	3636		3963	1995	3481		4035	1950	3432		4028	1995	3426		3983	1987	3458
		4011	2103	3605		4075	1975	3501		3990	1957	3376		4008	1988	3344		3991	1960	3457
		3893	2068	3645		4036	1978	3506		4078	1973	3492		3992	1949	3336		4010	1965	3434
		4023	2105	3538		4258	2126	3273		4274	2155	3208		4178	2120	3293		4326	2089	3290
		4030	2168	3499		4187	2101	3276		4311	2167	3239		4385	2096	3301		4318	2088	3266
		4072	2137	3588		4241	2110	3198		4343	2128	3216		4216	2108	3313		4246	2095	3202
		4091	2147	3527		4303	2102	3263		4341	2131	3282		4230	2101	3274		4283	2077	3291
		4047	2122	3456		4222	2100	3352		4342	2081	3261		4297	2095	3259		4267	2108	3211
		4057	2142	3473		4280	2096	3291		4388	2116	3246		4344	2124	3259		4370	2099	3237
		4000	2129	3532		4228	2095	3247		4308	2090	3234		4303	2116	3292		4257	2097	3296
		4062	2162	3482		4242	2108	3297		4263	2133	3235		4193	2135	3221		4278	2107	3275
		4014	2098	3514		4210	2056	3259		4310	2121	3247		4230	2107	3300		4367	2071	3266
		3981	2116	3475		4218	2097	3303		4292	2119	3362		4222	2127	3297		4295	2132	3240
		4105	2142	3451		4209	2126	3302		4274	2125	3265		4331	2097	3317		4340	2138	3331
		4091	2132	3517		4135	2112	3372		4318	2164	3262		4262	2102	3274		4384	2118	3214
		4004	2107	3553		4308	2131	3298		4451	2093	3229		4241	2121	3296		4397	2102	3318
		4020	2124	3481		4231	2127	3268		4249	2114	3245		4193	2099	3304		4396	2127	3267
		4061	2138	3441		4290	2070	3303		4315	2130	3224		4289	2120	3290		4364	2075	3268
		4061	2124	3530		4276	2133	3277		4318	2101	3252		4235	2042	3216		4260	2085	3295
		4062	2158	3548		4200	2063	3308		4230	2078	3251		4166	2079	3328		4307	2066	3266
		4128	2119	3497		4194	2106	3263		4343	2113	3217		4181	2091	3204		4298	2073	3250
		4077	2149	3476		4173	2085	3237		4337	2082	3239		4221	2125	3269		4252	2084	3277
		4090	2131	3479		4242	2099	3305		4333	2067	3180		4207	2129	3255		4218	2072	3197
		4060	2140	3504		4260	2078	3284		4187	2079	3351		4212	2074	3247		4383	2053	3279
		4086	2169	3465		4176	2057	3207		4295	2089	3175		4278	2081	3286		4392	2043	3263
		4086	2120	3535		4178	2075	3214		4239	2060	3182		4213	2093	3249		4335	2061	3217
		4037	2088	3494		4160	2067	3177		4231	2058	3262		4155	2059	3235		4318	2029	3230
		4089	2140	3517		4164	2036	3265		4222	2062	3196		4300	2071	3247		4264	2056	3201
		4062	2132	3466		4090	2076	3258		4311	2069	3192		4158	2074	3188		4312	2042	3251
		3994	2112	3459		4180	2058	3296		4210	2066	3179		4197	2054	3190		4194	2061	3221
		4022	2132	3484		4145	2038	3254		4230	2037	3237		4175	2042	3241		4251	2036	3213
		4046	2149	3445		4229	2017	3248		4189	2055	3217		4131	2049	3213		4210	2020	3256
		4088	2145	3478		4166	2067	3221		4259	2073	3158		4139	2021	3198		4255	2047	3193
		3806	2022	2820		3751	1872	2692		3738	1956	2575		3470	1872	2618		3392	1953	2590
		3820	2036	2861		3741	1877	2692		3671	1914	2668		3503	1852	2608		3477	2011	2560
		3735	2021	2918		3703	1870	2690		3730	1897	2547		3433	1838	2552		3410	1943	2544
		3775	2032	2852		3702	1881	2625		3737	1927	2642		3475	1859	2607		3360	1943	2523
		3777	2009	2861		3741	1850	2639		3731	1943	2560		3421	1860	2573		3418	1974	2547
		3782	2003	2863		3672	1849	2632		3693	1930	2578		3414	1843	2548		3304	1957	2559
		3777	2016	2806		3719	1831	2637		3703	1978	2553		3433	1850	2526		3421	1989	2533
		3692	2010	2799		3619	1881	2638		3776	1912	2561		3490	1847	2553		3470	1962	2502
		3759	2008	2867		3739	1867	2639		3680	1927	2544		3432	1871	2529		3408	1993	2520
		3734	2008	2872		3664	1874	2644		3674	1926	2570		3509	1840	2578		3418	1968	2551
		3718	2018	2813		3597	1856	2639		3660	1911	2520		3439	1827	2562		3360	2007	2541
		3704	2046	2795		3626	1851	2625		3603	1893	2554		3426	1849	2527		3359	1978	2503
		3749	2016	2876		3597	1861	2648		3626	1900	2567		3495	1844	2548		3448	1959	2497
		3764	2028	2840		3647	1863	2628		3664	1890	2562		3412	1789	2539		3318	1955	2470
		3759	2024	2785		3641	1848	2617		3655	1868	2523		3377	1790	2530		3311	1988	2537
		3771	1991	2806		3590	1836	2635		3614	1880	2523		3374	1792	2528		3345	1948	2496
		3705	2023	2843		3679	1856	2617		3616	1871	2547		3416	1804	2503		3293	1935	2441
		3769	2050	2830		3667	1831	2590		3589	1852	2531		3433	1786	2516		3377	1955	2443
		3686	2017	2822		3583	1827	2582		3615	1863	2556		3364	1807	2497		3369	1925	2472
		3698	2012	2833		3645	1819	2581		3550	1874	2528		3339	1781	2472		3352	1940	2418
		3740	2013	2858		3574	1816	2554		3731	1818	2535		3342	1777	2495		3241	1979	2423
		3756	2034	2853		3607	1812	2592		3524	1826	2473		3371	1753	2458		3306	1962	2401
		3706	1997	2848		3591	1816	2550		3683	1858	2473		3364	1805	2478		3314	1925	2393
		3749	2010	2784		3536	1793	2531		3551	1879	2470		3365	1762	2460		3240	1909	2370
		3720	2024	2766		3527	1805	2557		3556	1808	2500		3326	1779	2472		3272	1950	2411
		3700	1971	2831		3497	1837	2560		3543	1850	2451		3300	1789	2463		3250	1941	2409
		3680	2004	2788		3517	1831	2540		3513	1821	2479		3381	1771	2479		3266	1929	2407
		3715	2008	2770		3548	1800	2528		3585	1832	2473		3374	1758	2423		3241	1958	2385
		3702	1990	2796		3571	1791	2552		3598	1818	2482		3368	1806	2446		3324	1945	2384
		3684	2024	2788		3557	1805	2562		3553	1837	2447		3333	1781	2464		3243	1947	2380
		3730	2000	2758		3537	1827	2541		3569	1845	2488		3418	1791	2432		3264	1930	2373
		3673	2015	2832		3583	1784	2531		3552	1850	2467		3334	1783	2457		3184	1954	2411
		3651	1984	2847		3555	1799	2500		3558	1799	2473		3338	1788	2423		3225	1970	2394
		3679	1981	2777		3535	1790	2520		3519	1839	2464		3345	1771	2412		3311	1934	2412
		3651	1989	2782		3520	1838	2515		3597	1837	2513		3443	1759	2441		3246	1932	2348
		3736	2001	2775		3505	1790	2487		3590	1819	2477		3285	1751	2454		3291	1904	2381
		3765	2023	2847		3537	1776	2572		3502	1823	2494		3310	1766	2441		3292	1940	2374
		3667	1958	2799		3523	1799	2562		3574	1857	2460		3329	1754	2448		3295	1945	2406
		3697	1975	2799		3533	1808	2545		3534	1857	2482		3356	1742	2419		3257	1933	2385
		3692	1978	2812		3532	1844	2561		3569	1839	2462		3459	1741	2421		3285	1946	2362
		3744	2042	2773		3595	1828	2527		3632	1820	2449		3332	1757	2453		3262	1942	2388
		3619	2048	2862		3581	1799	2548		3484	1804	2487		3302	1761	2438		3298	1906	2371
		3649	2014	2811		3589	1810	2496		3549	1829	2467		3363	1750	2427		3295	1924	2372
		3648	2015	2831		3552	1815	2577		3475	1807	2500		3317	1779	2436		3269	1950	2436
		3657	1959	2792		3521	1776	2555		3619	1837	2494		3381	1766	2431		3207	1932	2324
		3600	1985	2773		3522	1810	2571		3729	1832	2448		3401	1753	2412		3249	1938	2377
		3685	1989	2765		3532	1806	2549		3529	1838	2532		3385	1754	2435		3256	1955	2415
		3591	1967	2755		3596	1782	2520		3545	1858	2467		3378	1738	2395		3233	1945	2369
		3706	1964	2758		3558	1807	2532		3486	1792	2475		3353	1725	2407		3203	1933	2373
		3647	1957	2775		3514	1792	2500		3567	1800	2476		3370	1762	2375		3199	1937	2341
		3608	1968	2778		3523	1784	2492		3619	1822	2427		3294	1743	2439		3168	1890	2334
		3622	1965	2837		3554	1794	2535		3465	1826	2516		3289	1743	2430		3240	1903	2405
		3631	1983	2737		3548	1818	2535		3484	1815	2477		3279	1781	2429		3166	1944	2352
		3665	1955	2771		3612	1787	2525		3583	1825	2448		3383	1735	2407		3241	1944	2410
		3613	1955	2755		3509	1802	2540		3542	1781	2449		3387	1709	2378		3210	1937	2337
		3569	1976	2777		3545	1800	2516		3595	1815	2465		3273	1721	2390		3285	1888	2312
		3620	1955	2722		3654	1795	2523		3586	1824	2432		3311	1715	2402		3208	1933	2374
		3657	1998	2746		3551	1769	2533		3495	1814	2438		3338	1760	2368		3176	1916	2326
		3736	2004	2800		3544	1794	2500		3621	1809	2462		3319	1720	2470		3163	1920	2346
		3600	1965	2775		3518	1795	2528		3492	1784	2469		3305	1749	2389		3188	1926	2317
		3599	1968	2761		3555	1773	2561		3531	1800	2438		3294	1727	2421		3192	1938	2363
		3639	1996	2726		3520	1780	2530		3539	1801	2447		3275	1749	2391		3118	1918	2322
		3651	1987	2729		3519	1794	2551		3508	1778	2462		3327	1726	2380		3148	1932	2407
		3576	1986	2719		3560	1763	2511		3510	1814	2495		3327	1723	2371		3174	1876	2320
		3643	1965	2721		3491	1747	2525		3574	1794	2471		3289	1708	2382		3206	1900	2319
		3564	1976	2719		3542	1758	2475		3616	1750	2465		3284	1701	2374		3215	1902	2261
		3613	2000	2764		3507	1782	2508		3497	1816	2439		3313	1685	2375		3198	1884	2287
		3601	1973	2751		3508	1785	2524		3543	1798	2465		3249	1682	2395		3175	1873	2302
		3653	1961	2710		3526	1747	2537		3468	1779	2438		3327	1709	2378		3149	1885	2327
		3627	1987	2744		3479	1774	2489		3565	1764	2489		3331	1675	2373		3210	1905	2352
		3583	1969	2703		3538	1760	2532		3464	1770	2424		3331	1679	2363		3239	1901	2304
		3573	1971	2726		3569	1763	2522		3550	1780	2426		3327	1687	2401		3159	1900	2358
		3647	1975	2748		3545	1761	2488		3483	1783	2481		3259	1692	2395		3211	1878	2333
		3534	1990	2717		3519	1771	2551		3502	1755	2439		3246	1681	2386		3217	1888	2318
		3622	1960	2756		3608	1746	2530		3516	1744	2453		3295	1678	2392		3218	1875	2296
		3660	1961	2779		3533	1749	2489		3496	1746	2456		3290	1654	2338		3158	1882	2290
		3523	1965	2744		3484	1797	2539		3530	1761	2457		3270	1673	2419		3136	1906	2287
		3554	1969	2765		3600	1804	2544		3527	1740	2438		3278	1689	2398		3156	1900	2296
		3677	2016	2817		3514	1737	2479		3498	1765	2428		3312	1660	2361		3167	1879	2271
		3600	1959	2792		3461	1765	2488		3487	1748	2458		3234	1674	2407		3191	1889	2285
		3603	1954	2778		3524	1736	2463		3441	1776	2407		3299	1660	2352		3095	1889	2320
		3722	1966	2791		3479	1758	2476		3498	1759	2432		3296	1704	2338		3146	1885	2285
		3623	1979	2807		3448	1765	2469		3538	1757	2435		3254	1663	2352		3121	1869	2277
		3589	1940	2845		3511	1732	2470		3493	1759	2429		3255	1683	2366		3146	1900	2255
		3599	1970	2763		3477	1760	2452		3473	1761	2425		3236	1676	2400		3080	1889	2246
		3621	1974	2748		3515	1785	2434		3551	1742	2426		3236	1673	2366		3112	1887	2278
		3596	1955	2715		3528	1744	2426		3489	1768	2412		3310	1669	2338		3191	1858	2282
		3634	1957	2785		3526	1752	2467		3515	1743	2422		3310	1665	2358		3151	1888	2281
		3720	1948	2805		3537	1752	2464		3539	1755	2410		3243	1661	2322		3179	1895	2260
		3701	1977	2741		3516	1738	2469		3514	1741	2424		3324	1650	2355		3154	1878	2284
		3704	1971	2788		3455	1730	2442		3491	1760	2436		3268	1665	2374		3122	1895	2229
		3671	1941	2735		3526	1766	2440		3496	1743	2405		3272	1664	2357		3113	1853	2275
		3752	1934	2740		3542	1773	2436		3440	1746	2400		3248	1667	2333		3108	1908	2231
		3676	1945	2744		3427	1743	2434		3582	1774	2394		3258	1660	2317		3113	1876	2254
		3653	1963	2793		3542	1741	2498		3477	1754	2380		3323	1645	2318		3188	1904	2227
		3669	1954	2727		3504	1715	2419		3385	1739	2435		3216	1669	2317		3110	1903	2233
		3660	1939	2725		3466	1728	2463		3457	1721	2377		3313	1626	2317		3097	1892	2257
		3708	1945	2763		3406	1778	2423		3477	1745	2406		3289	1661	2302		3164	1900	2212
		3646	1922	2768		3445	1735	2403		3467	1718	2405		3187	1643	2332		3141	1876	2255
		3745	1946	2723		3398	1717	2469		3414	1756	2351		3293	1673	2329		3124	1885	2223
		3650	1932	2737		3477	1747	2464		3366	1722	2364		3194	1672	2304		3053	1905	2225
		3631	1932	2749		3381	1754	2458		3387	1762	2361		3245	1664	2294		3053	1894	2233
		3626	1937	2750		3388	1760	2449		3476	1723	2369		3205	1658	2319		3014	1903	2231
		3692	1972	2738		3408	1759	2468		3425	1737	2418		3192	1636	2323		3045	1846	2210
		3601	1939	2707		3406	1751	2410		3440	1734	2390		3233	1655	2357		3091	1880	2265
		3662	1894	2751		3439	1739	2442		3369	1760	2401		3232	1646	2293		3064	1882	2247
		3640	1932	2731		3422	1733	2473		3433	1712	2359		3246	1611	2296		3041	1883	2256
		3594	1931	2734		3441	1753	2454		3401	1737	2395		3278	1649	2296		3120	1901	2220
		3628	1896	2716		3414	1723	2439		3436	1719	2415		3239	1618	2317		2981	1864	2220
		3608	1922	2728		3460	1754	2433		3401	1731	2358		3234	1653	2321		3116	1862	2234
		3632	1928	2690		3469	1748	2463		3419	1750	2358		3216	1658	2302		3034	1875	2227
		3636	1935	2745		3384	1773	2470		3394	1722	2391		3269	1638	2305		3096	1868	2198
		3645	1961	2720		3388	1749	2447		3350	1715	2439		3224	1642	2301		3091	1858	2182
		3577	1959	2716		3464	1748	2476		3457	1713	2369		3177	1662	2303		3035	1889	2220
		3618	1948	2699		3406	1728	2447		3402	1705	2341		3115	1639	2313		3052	1867	2197
		3653	1947	2753		3421	1773	2401		3391	1765	2369		3220	1621	2317		2986	1871	2207
		3579	1926	2716		3461	1717	2382		3424	1710	2349		3265	1636	2267		3032	1892	2188
		3683	1910	2733		3434	1754	2482		3385	1733	2455		3150	1643	2285		3041	1883	2159
		3604	1934	2673		3456	1759	2393		3382	1692	2367		3167	1638	2272		3014	1885	2218
		3629	1939	2718		3463	1753	2425		3456	1702	2389		3168	1625	2296		2979	1877	2184
		3535	1940	2736		3434	1757	2447		3461	1734	2330		3230	1621	2334		3054	1862	2162
		3692	1917	2681		3431	1766	2461		3391	1709	2372		3125	1635	2279		3017	1867	2221
		3559	1964	2685		3441	1760	2480		3487	1705	2369		3174	1645	2325		3009	1863	2186
		3558	1928	2725		3440	1726	2467		3326	1735	2387		3254	1637	2262		3013	1886	2192
		3621	1929	2723		3455	1749	2470		3381	1702	2346		3174	1662	2287		3042	1905	2209
		3597	1918	2660		3439	1730	2433		3446	1716	2377		3124	1634	2339		2948	1886	2186
		3585	1945	2693		3471	1761	2417		3407	1724	2375		3191	1622	2287		3005	1901	2186
		3559	1929	2707		3465	1727	2473		3398	1740	2357		3274	1588	2260		3003	1877	2177
		3536	1913	2714		3475	1718	2409		3331	1664	2378		3185	1618	2271		2965	1848	2218
		3577	1910	2741		3406	1738	2456		3420	1684	2366		3218	1612	2313		2976	1860	2200
		3524	1927	2709		3403	1731	2409		3412	1670	2393		3200	1632	2278		2976	1890	2207
		3497	1904	2700		3380	1748	2449		3369	1676	2357		3150	1625	2293		2989	1867	2147
		3560	1897	2679		3416	1730	2513		3418	1726	2344		3266	1624	2247		2972	1895	2150
		3515	1923	2656		3452	1718	2410		3410	1721	2361		3182	1610	2301		3002	1876	2169
		3560	1891	2712		3402	1716	2414		3391	1696	2369		3145	1617	2282		2951	1852	2163
		3519	1898	2716		3520	1722	2376		3294	1699	2365		3184	1616	2258		2975	1858	2225
		3602	1919	2688		3426	1718	2428		3405	1704	2351		3189	1594	2292		2982	1905	2165
		3623	1914	2692		3430	1744	2428		3504	1700	2364		3133	1622	2294		3008	1857	2158
		3553	1898	2671		3424	1715	2440		3319	1691	2383		3163	1615	2273		2996	1871	2178
		3541	1898	2629		3379	1716	2467		3403	1749	2356		3140	1637	2285		2892	1904	2166
		3521	1912	2671		3444	1739	2439		3348	1726	2330		3165	1615	2251		2964	1886	2125
		3617	1908	2702		3370	1744	2436		3407	1723	2341		3170	1619	2276		2988	1881	2166
		3545	1918	2693		3401	1721	2438		3377	1710	2391		3186	1618	2244		2919	1852	2179
		3517	1943	2794		3451	1706	2392		3393	1710	2336		3087	1588	2245		2953	1884	2107
		3541	1905	2711		3445	1725	2391		3475	1700	2364		3190	1611	2253		2919	1845	2147
		3566	1942	2689		3469	1731	2394		3434	1712	2330		3206	1606	2256		2944	1864	2118
		3565	1912	2647		3427	1737	2427		3359	1686	2341		3169	1633	2220		2887	1861	2161
		3572	1897	2705		3411	1727	2407		3368	1682	2367		3116	1595	2302		2963	1867	2127
		3585	1897	2701		3349	1743	2418		3429	1699	2372		3155	1612	2251		2875	1843	2153
		3435	1917	2651		3431	1744	2382		3466	1695	2327		3292	1605	2260		2937	1891	2160
		3574	1884	2691		3396	1706	2446		3345	1739	2375		3114	1610	2246		2884	1879	2105
		3562	1907	2644		3361	1744	2394		3312	1698	2358		3112	1585	2259		2925	1847	2163
		3534	1874	2708		3380	1729	2441		3342	1665	2325		3164	1585	2257		2884	1858	2152
		3543	1904	2666		3370	1717	2383		3416	1677	2360		3166	1607	2288		2924	1865	2125
		3538	1906	2639		3385	1726	2421		3478	1669	2357		3133	1605	2253		2930	1844	2145
		3630	1913	2650		3382	1718	2381		3445	1682	2316		3143	1606	2289		2901	1874	2152
		3580	1902	2706		3422	1747	2406		3402	1687	2393		3180	1587	2220		2884	1818	2138
		3510	1908	2687		3416	1742	2406		3321	1685	2376		3065	1599	2236		2963	1865	2134
		3500	1901	2654		3396	1703	2393		3354	1675	2380		3141	1583	2238		2923	1853	2160
		3512	1920	2678		3417	1710	2430		3326	1674	2342		3112	1597	2280		2925	1853	2135
		3538	1902	2658		3431	1691	2394		3382	1687	2345		3129	1617	2274		2869	1830	2133
		3618	1884	2657		3450	1735	2431		3444	1713	2286		3103	1600	2250		2867	1836	2147
		3526	1880	2614		3434	1703	2434		3363	1685	2431		3062	1591	2244		2956	1850	2152
		3638	1921	2604		3395	1725	2388		3407	1683	2335		3127	1557	2217		2905	1870	2122
		3589	1900	2678		3465	1715	2399		3336	1672	2350		3069	1591	2222		2882	1853	2105
		3531	1914	2686		3463	1723	2434		3340	1672	2398		3113	1610	2242		2919	1870	2133
		3479	1925	2609		3423	1700	2383		3359	1715	2348		3158	1591	2219		2920	1834	2100
		3531	1895	2593		3455	1748	2425		3406	1666	2358		3117	1585	2206		2823	1838	2134
		3566	1915	2613		3365	1711	2406		3402	1680	2349		3144	1586	2218		2876	1858	2117
		3477	1904	2690		3413	1727	2373		3366	1672	2330		3148	1565	2253		2893	1854	2114
		3484	1890	2647		3416	1702	2489		3316	1664	2344		3180	1578	2223		2863	1894	2112
		3455	1909	2664		3379	1742	2385		3308	1690	2378		3152	1578	2274		2852	1853	2126
		3610	1898	2609		3372	1707	2365		3358	1685	2352		3185	1617	2219		2894	1853	2098
		3533	1909	2652		3364	1730	2366		3350	1688	2325		3083	1582	2222		2867	1837	2127
		3554	1917	2666		3358	1750	2429		3354	1673	2330		3040	1587	2296		2834	1834	2133
		3704	1764	3301		387	176	357		789	307	672		1418	595	989		1614	454	1405
		3646	1798	3323		353	158	325		747	272	640		1344	582	934		1586	426	1344
		3660	1774	3308		333	148	307		689	262	593		1289	538	904		1578	399	1275
		3629	1801	3335		299	128	285		644	238	538		1270	501	849		1514	374	1253
		3824	1804	3339		283	120	263		612	228	517		1220	470	809		1445	342	1230
		3698	1786	3343		261	108	250		567	211	467		1177	463	779		1460	334	1176
		3625	1776	3332		255	102	226		533	202	450		1151	446	763		1398	316	1146
		3702	1781	3373		236	91	222		511	194	426		1115	427	722		1387	306	1144
		3650	1788	3333		223	88	209		485	185	395		1110	401	684		1336	298	1150
		3661	1807	3356		212	83	196		455	169	384		1056	399	666		1360	283	1043
		3664	1796	3383		201	77	183		450	162	355		1041	378	638		1270	260	1030
		3621	1804	3331		191	78	177		412	156	326		995	366	617		1253	248	1026
		3646	1746	3366		182	72	165		375	148	306		991	357	602		1267	247	980
		3694	1776	3327		174	64	161		372	138	300		950	341	574		1217	235	972
		3666	1781	3357		164	66	151		362	124	286		961	337	568		1249	219	963
		3767	1817	3331		151	63	157		337	121	260		925	329	532		1192	212	932
		3646	1802	3302		149	58	144		322	116	251		880	318	518		1173	206	888
		3742	1789	3381		145	61	136		302	109	243		882	302	492		1150	200	887
		3666	1786	3352		139	56	133		291	104	231		861	294	476		1149	189	873
		3661	1807	3319		133	59	128		282	98	217		853	284	473		1113	179	870
		3717	1790	3279		128	53	122		267	92	214		801	277	439		1101	177	860
		3759	1785	3353		126	49	125		255	88	198		794	271	433		1102	165	803
		3703	1752	3294		119	51	115		246	93	191		751	268	420		1041	163	811
		3616	1780	3278		121	50	110		239	86	184		759	259	405		1059	153	814
		3673	1781	3331		113	45	115		229	82	185		729	249	390		1030	148	786
		3624	1767	3340		109	50	107		214	77	174		721	246	382		1014	145	774
		3713	1757	3272		109	49	108		214	75	168		707	242	372		991	141	767
		3699	1785	3354		109	44	105		207	70	166		699	223	360		1003	135	767
		3642	1799	3301		103	46	101		193	71	155		681	226	347		1009	132	743
		3728	1775	3289		102	43	101		194	70	150		655	217	341		976	130	722
		3694	1780	3303		97	43	103		187	61	145		661	213	338		964	118	716
		3664	1745	3298		92	47	98		178	65	136		662	211	324		968	119	704
		3641	1768	3417		93	42	97		174	58	135		637	205	329		949	114	699
		3655	1747	3272		92	40	94		172	55	131		608	200	313		951	110	687
		3741	1755	3356		87	40	90		170	58	131		614	198	309		925	103	671
		3740	1776	3327		90	40	99		158	53	125		602	198	292		903	100	654
		3717	1768	3362		90	41	90		155	53	119		591	186	293		917	97	632
		3687	1770	3291		87	37	89		151	53	118		585	188	277		908	98	625
		3610	1731	3399		86	38	91		145	54	120		553	183	275		880	88	617
		3633	1733	3390		83	40	86		143	47	112		549	183	267		883	92	619
		3630	1747	3353		84	35	86		135	48	100		541	177	252		855	87	593
		3714	1727	3350		85	33	82		138	47	97		532	177	252		850	88	576
		3646	1750	3341		82	35	86		128	45	100		511	169	240		875	81	561
		3574	1740	3335		78	40	79		124	47	92		508	162	234		837	80	551
		3581	1715	3357		80	36	81		128	43	88		497	161	224		830	79	528
		3659	1744	3388		79	33	81		125	39	84		487	156	220		813	76	522
		3641	1741	3337		80	39	76		116	40	80		480	156	210		812	74	517
		3613	1717	3325		75	33	80		111	40	81		473	143	212		813	76	514
		3609	1743	3378		75	34	76		111	36	79		478	148	197		810	71	489
		3583	1727	3314		77	34	71		113	41	71		479	137	188		797	69	496
		3625	1769	3358		75	33	74		104	40	67		456	141	185		767	68	474
		3604	1747	3338		75	35	74		103	35	67		444	138	178		782	68	459
		3713	1739	3330		72	33	71		103	34	67		427	135	175		772	63	470
		3607	1726	3351		70	34	73		97	34	65		432	129	171		775	65	441
		3551	1749	3391		75	34	69		98	32	66		424	127	168		746	59	439
		3553	1711	3287		67	34	70		93	36	62		426	129	159		753	59	432
