# Supplementary material for: Structures of ferroportin in complex with its specific inhibitor vamifeport
Source: eLife journal article supplement (doi:10.7554/elife.83053), 2023-02-28
Supplement: fig1-figsupp3-data1 [file Figure1_supplement3.xlsx]

## Sheet: Figure 1_suppl3_Sy3
		Absorption, 230nm
	volume (ml)	FPN alone	with Sy3, w/o vamifeport	with Sy3, with vamifeport
	0.000373333	0.312328	104.207	132.85
	0.00170667	0.321865	103.859	132.667
	0.00304	0.331879	103.53	132.479
	0.00437333	0.341892	103.216	132.28
	0.00570667	0.348568	102.912	132.073
	0.00704	0.351906	102.609	131.861
	0.00837333	0.352383	102.302	131.649
	0.00970667	0.351906	101.983	131.442
	0.01104	0.350952	101.649	131.245
	0.0123733	0.349522	101.299	131.053
	0.0137067	0.349045	100.938	130.86
	0.01504	0.349522	100.569	130.658
	0.0163733	0.351429	100.193	130.442
	0.0177067	0.352859	99.8118	130.216
	0.01904	0.35429	99.4265	129.981
	0.0203733	0.354767	99.0374	129.741
	0.0217067	0.354767	98.6454	129.5
	0.02304	0.355244	98.252	129.258
	0.0243733	0.355721	97.8568	129.017
	0.0257067	0.356197	97.4605	128.774
	0.02704	0.357628	97.0647	128.529
	0.0283733	0.360012	96.6694	128.28
	0.0297067	0.362396	96.2732	128.031
	0.03104	0.364304	95.8755	127.778
	0.0323733	0.366688	95.4778	127.524
	0.0337067	0.369072	95.0816	127.267
	0.03504	0.371456	94.6872	127.006
	0.0363733	0.372887	94.2938	126.743
	0.0377067	0.373363	93.9004	126.478
	0.03904	0.37384	93.508	126.212
	0.0403733	0.37384	93.116	125.943
	0.0417067	0.37384	92.725	125.674
	0.04304	0.373363	92.3354	125.404
	0.0443733	0.374317	91.9473	125.133
	0.0457067	0.375271	91.5615	124.861
	0.04704	0.376701	91.1777	124.587
	0.0483733	0.378132	90.7943	124.309
	0.0497067	0.379562	90.4109	124.029
	0.05104	0.380993	90.0271	123.747
	0.0523733	0.382423	89.6432	123.463
	0.0537067	0.383377	89.2599	123.177
	0.05504	0.383854	88.8769	122.89
	0.0563733	0.385284	88.4955	122.603
	0.0577067	0.386715	88.1145	122.315
	0.05904	0.388145	87.7349	122.026
	0.0603733	0.389576	87.3554	121.735
	0.0617067	0.391483	86.9763	121.442
	0.06304	0.393391	86.5972	121.147
	0.0643733	0.395298	86.2191	120.852
	0.0657067	0.396729	85.8424	120.555
	0.06704	0.398159	85.4666	120.257
	0.0683733	0.400066	85.0918	119.957
	0.0697067	0.401974	84.718	119.657
	0.07104	0.403881	84.3451	119.356
	0.0723733	0.405312	83.9741	119.056
	0.0737067	0.407219	83.6041	118.754
	0.07504	0.409126	83.235	118.453
	0.0763733	0.411034	82.8669	118.151
	0.0777067	0.412464	82.4997	117.848
	0.07904	0.413895	82.1345	117.543
	0.0803733	0.416279	81.7702	117.237
	0.0817067	0.418663	81.4073	116.929
	0.08304	0.421047	81.0454	116.62
	0.0843733	0.423431	80.6844	116.312
	0.0857067	0.425339	80.3225	116.004
	0.08704	0.426769	79.9596	115.697
	0.0883733	0.427723	79.5963	115.388
	0.0897067	0.428677	79.2329	115.078
	0.09104	0.42963	78.8715	114.769
	0.0923733	0.430584	78.5124	114.459
	0.0937067	0.432014	78.1567	114.148
	0.09504	0.434399	77.8038	113.835
	0.0963733	0.436783	77.4534	113.522
	0.0977067	0.439167	77.1024	113.208
	0.09904	0.441074	76.75	112.892
	0.100373	0.442505	76.3967	112.575
	0.101707	0.444412	76.0438	112.256
	0.10304	0.446796	75.6905	111.937
	0.104373	0.448704	75.3376	111.616
	0.105707	0.450134	74.9857	111.293
	0.10704	0.452042	74.6353	110.971
	0.108373	0.453949	74.2857	110.648
	0.109707	0.455856	73.9372	110.326
	0.11104	0.458241	73.5891	110.005
	0.112373	0.460625	73.2405	109.686
	0.113707	0.462532	72.8929	109.367
	0.11504	0.464916	72.5462	109.047
	0.116373	0.4673	72.2001	108.725
	0.117707	0.469208	71.8548	108.401
	0.11904	0.470161	71.5105	108.075
	0.120373	0.471592	71.1672	107.747
	0.121707	0.473022	70.8258	107.418
	0.12304	0.473976	70.4844	107.09
	0.124373	0.47493	70.1439	106.761
	0.125707	0.47636	69.8054	106.432
	0.12704	0.478268	69.4678	106.102
	0.128373	0.480652	69.1311	105.771
	0.129707	0.483036	68.795	105.441
	0.13104	0.486374	68.4593	105.11
	0.132373	0.489235	68.1236	104.781
	0.133707	0.491142	67.7883	104.453
	0.13504	0.491619	67.4527	104.124
	0.136373	0.491142	67.1179	103.797
	0.137707	0.491142	66.7846	103.471
	0.13904	0.492573	66.4537	103.144
	0.140373	0.49448	66.1247	102.816
	0.141707	0.496864	65.7961	102.488
	0.14304	0.499725	65.4671	102.16
	0.144373	0.503063	65.1376	101.831
	0.145707	0.505447	64.8076	101.501
	0.14704	0.508308	64.4772	101.169
	0.148373	0.511169	64.1477	100.837
	0.149707	0.51403	63.8206	100.504
	0.15104	0.516415	63.4954	100.171
	0.152373	0.518799	63.1726	99.8367
	0.153707	0.52166	62.8517	99.5025
	0.15504	0.523567	62.5317	99.1663
	0.156373	0.525475	62.2117	98.8301
	0.157707	0.526905	61.8923	98.494
	0.15904	0.528812	61.5737	98.1587
	0.160373	0.53072	61.2566	97.8245
	0.161707	0.532627	60.941	97.4912
	0.16304	0.535011	60.6258	97.1598
	0.164373	0.537395	60.312	96.8284
	0.165707	0.53978	59.9992	96.4951
	0.16704	0.54121	59.6874	96.1594
	0.168373	0.542641	59.3765	95.8218
	0.169707	0.543594	59.0665	95.4832
	0.17104	0.544548	58.7575	95.1442
	0.172373	0.545502	58.4485	94.8066
	0.173707	0.546455	58.1405	94.4709
	0.17504	0.54884	57.832	94.1362
	0.176373	0.551224	57.5235	93.8014
	0.177707	0.554085	57.2154	93.4671
	0.17904	0.555992	56.9079	93.1324
	0.180373	0.557899	56.6013	92.7981
	0.181707	0.55933	56.2966	92.4653
	0.18304	0.56076	55.9938	92.1344
	0.184373	0.561714	55.6934	91.8049
	0.185707	0.563622	55.3944	91.4759
	0.18704	0.565529	55.0959	91.1469
	0.188373	0.567913	54.7984	90.8169
	0.189707	0.56982	54.5003	90.4855
	0.19104	0.571728	54.2023	90.1531
	0.192373	0.574112	53.9062	89.8217
	0.193707	0.576019	53.6125	89.4927
	0.19504	0.57745	53.3211	89.1651
	0.196373	0.579357	53.0312	88.838
	0.197707	0.581264	52.7427	88.5109
	0.19904	0.584126	52.4547	88.1833
	0.200373	0.586987	52.1667	87.8548
	0.201707	0.589848	51.8787	87.5248
	0.20304	0.591278	51.5907	87.1948
	0.204373	0.593185	51.3055	86.8658
	0.205707	0.59557	51.0232	86.5387
	0.20704	0.597477	50.7443	86.2144
	0.208373	0.597954	50.4663	85.8921
	0.209707	0.597477	50.1893	85.5712
	0.21104	0.597954	49.9132	85.2508
	0.212373	0.599384	49.6375	84.9294
	0.213707	0.601768	49.3615	84.6066
	0.21504	0.60463	49.0854	84.2818
	0.216373	0.607491	48.8117	83.9552
	0.217707	0.610828	48.5384	83.6266
	0.21904	0.613213	48.2652	83.2981
	0.220373	0.61512	47.992	82.9705
	0.221707	0.61512	47.7178	82.6444
	0.22304	0.615597	47.4436	82.3201
	0.224373	0.61655	47.1685	81.9968
	0.225707	0.617981	46.8938	81.6735
	0.22704	0.619888	46.6211	81.3512
	0.228373	0.621319	46.3512	81.0303
	0.229707	0.622272	46.0842	80.7094
	0.23104	0.623226	45.8195	80.3875
	0.232373	0.62418	45.5573	80.0656
	0.233707	0.62561	45.2955	79.7442
	0.23504	0.627518	45.0351	79.4224
	0.236373	0.629902	44.7748	79.1
	0.237707	0.632286	44.5134	78.7782
	0.23904	0.635147	44.2517	78.4582
	0.240373	0.637054	43.9913	78.1402
	0.241707	0.638962	43.7319	77.824
	0.24304	0.641346	43.473	77.5079
	0.244373	0.645161	43.215	77.1932
	0.245707	0.648975	42.9575	76.8785
	0.24704	0.652313	42.7015	76.5633
	0.248373	0.654221	42.4464	76.2481
	0.249707	0.656605	42.1936	75.9324
	0.25104	0.658512	41.9428	75.6182
	0.252373	0.659943	41.6934	75.3054
	0.253707	0.661373	41.4469	74.994
	0.25504	0.662804	41.2037	74.6826
	0.256373	0.664711	40.9624	74.3708
	0.257707	0.666142	40.7221	74.0584
	0.25904	0.668049	40.4818	73.7452
	0.260373	0.669479	40.2415	73.4314
	0.261707	0.671387	40.0011	73.1176
	0.26304	0.673771	39.7613	72.8044
	0.264373	0.676632	39.5215	72.4935
	0.265707	0.67997	39.283	72.184
	0.26704	0.683308	39.0465	71.875
	0.268373	0.685692	38.8119	71.566
	0.269707	0.687599	38.5778	71.257
	0.27104	0.68903	38.3441	70.948
	0.272373	0.690937	38.1105	70.6395
	0.273707	0.692368	37.8778	70.3329
	0.27504	0.694275	37.647	70.0282
	0.276373	0.696182	37.4186	69.7264
	0.277707	0.698566	37.1916	69.4264
	0.27904	0.700474	36.9661	69.1275
	0.280373	0.701427	36.741	68.8285
	0.281707	0.701427	36.5155	68.5286
	0.28304	0.701427	36.2899	68.2281
	0.284373	0.701427	36.0639	67.9277
	0.285707	0.702858	35.8393	67.6278
	0.28704	0.705242	35.6171	67.3279
	0.288373	0.708103	35.3959	67.0289
	0.289707	0.712395	35.1756	66.7318
	0.29104	0.715733	34.9562	66.4352
	0.292373	0.718117	34.7373	66.1396
	0.293707	0.71907	34.5199	65.8444
	0.29504	0.720024	34.3029	65.5502
	0.296373	0.720978	34.0869	65.2565
	0.297707	0.722885	33.8719	64.9642
	0.29904	0.724316	33.6587	64.6724
	0.300373	0.726223	33.4461	64.381
	0.301707	0.727654	33.2343	64.0897
	0.30304	0.729084	33.0236	63.7974
	0.304373	0.730038	32.8133	63.5051
	0.305707	0.730991	32.603	63.2123
	0.30704	0.732899	32.3932	62.92
	0.308373	0.736237	32.1848	62.6296
	0.309707	0.739098	31.9784	62.3397
	0.31104	0.741959	31.7733	62.0502
	0.312373	0.74482	31.5688	61.7622
	0.313707	0.747204	31.3651	61.4747
	0.31504	0.749588	31.1625	61.1886
	0.316373	0.751495	30.9608	60.902
	0.317707	0.753403	30.7596	60.6174
	0.31904	0.755787	30.5593	60.3346
	0.320373	0.758648	30.3614	60.0533
	0.321707	0.761509	30.1664	59.7729
	0.32304	0.763893	29.9714	59.493
	0.324373	0.7658	29.7768	59.214
	0.325707	0.768185	29.5808	58.9336
	0.32704	0.770092	29.3848	58.6533
	0.328373	0.770569	29.1884	58.3734
	0.329707	0.770569	28.9929	58.0944
	0.33104	0.771046	28.7983	57.8169
	0.332373	0.772476	28.6052	57.5413
	0.333707	0.775337	28.414	57.2666
	0.33504	0.778198	28.2233	56.9934
	0.336373	0.781059	28.0344	56.7197
	0.337707	0.784397	27.8466	56.4455
	0.33904	0.787735	27.6606	56.1709
	0.340373	0.790119	27.4765	55.8971
	0.341707	0.79155	27.2949	55.6258
	0.34304	0.79298	27.1156	55.3569
	0.344373	0.794888	26.9377	55.0899
	0.345707	0.797272	26.7613	54.8228
	0.34704	0.800133	26.5858	54.5558
	0.348373	0.802517	26.4108	54.2883
	0.349707	0.804901	26.2358	54.0198
	0.35104	0.806808	26.0608	53.7514
	0.352373	0.809193	25.8853	53.4839
	0.353707	0.811577	25.7103	53.2178
	0.35504	0.813961	25.5358	52.9532
	0.356373	0.817299	25.3618	52.6904
	0.357707	0.820637	25.1892	52.4286
	0.35904	0.824451	25.0175	52.1673
	0.360373	0.826836	24.8468	51.9065
	0.361707	0.828266	24.6765	51.6471
	0.36304	0.828743	24.5078	51.3886
	0.364373	0.829697	24.3394	51.1321
	0.365707	0.831127	24.1716	50.877
	0.36704	0.832081	24.0047	50.6233
	0.368373	0.833988	23.8378	50.3706
	0.369707	0.835896	23.6709	50.1179
	0.37104	0.837803	23.505	49.8651
	0.372373	0.839233	23.3405	49.611
	0.373707	0.840187	23.1774	49.3568
	0.37504	0.841141	23.0153	49.1032
	0.376373	0.843048	22.8541	48.8495
	0.377707	0.845432	22.6953	48.5977
	0.37904	0.847816	22.5379	48.3474
	0.380373	0.849724	22.3815	48.099
	0.381707	0.851154	22.2251	47.852
	0.38304	0.852108	22.0697	47.605
	0.384373	0.853062	21.9142	47.3579
	0.385707	0.854492	21.7593	47.1114
	0.38704	0.855446	21.6043	46.8668
	0.388373	0.85783	21.4507	46.6236
	0.389707	0.860691	21.2977	46.3823
	0.39104	0.863075	21.147	46.142
	0.392373	0.865459	20.9973	45.9031
	0.393707	0.867367	20.8475	45.6652
	0.39504	0.869751	20.6978	45.4272
	0.396373	0.872135	20.5486	45.1888
	0.397707	0.874996	20.4003	44.9504
	0.39904	0.877857	20.252	44.7129
	0.400373	0.880718	20.1051	44.4769
	0.401707	0.883579	19.9592	44.2418
	0.40304	0.885487	19.8152	44.0086
	0.404373	0.887394	19.6721	43.7764
	0.405707	0.888824	19.53	43.5442
	0.40704	0.890255	19.3884	43.311
	0.408373	0.892162	19.2478	43.0793
	0.409707	0.89407	19.108	42.8485
	0.41104	0.896454	18.9683	42.6201
	0.412373	0.898838	18.8296	42.3936
	0.413707	0.901699	18.6918	42.1695
	0.41504	0.904083	18.5554	41.9463
	0.416373	0.906944	18.4204	41.7227
	0.417707	0.909328	18.2855	41.4971
	0.41904	0.912666	18.1515	41.2706
	0.420373	0.915527	18.0185	41.0432
	0.421707	0.918388	17.8864	40.8153
	0.42304	0.920296	17.7538	40.5883
	0.424373	0.921726	17.6222	40.3632
	0.425707	0.923157	17.4911	40.1396
	0.42704	0.92411	17.3604	39.9179
	0.428373	0.92411	17.2307	39.698
	0.429707	0.92411	17.1015	39.4796
	0.43104	0.924587	16.9723	39.2627
	0.432373	0.925541	16.844	39.0467
	0.433707	0.926971	16.7162	38.8316
	0.43504	0.929356	16.5904	38.617
	0.436373	0.931263	16.4649	38.4034
	0.437707	0.933647	16.3405	38.1898
	0.43904	0.936031	16.217	37.9766
	0.440373	0.937939	16.094	37.7625
	0.441707	0.938892	15.9714	37.5485
	0.44304	0.9408	15.8489	37.3348
	0.444373	0.942707	15.7263	37.1226
	0.445707	0.945091	15.6047	36.9114
	0.44704	0.947952	15.4836	36.7011
	0.448373	0.951767	15.3635	36.4927
	0.449707	0.954628	15.2442	36.2858
	0.45104	0.957489	15.1265	36.0793
	0.452373	0.959873	15.0092	35.8724
	0.453707	0.962734	14.8923	35.6664
	0.45504	0.966072	14.7765	35.4618
	0.456373	0.967979	14.6601	35.2591
	0.457707	0.969887	14.5447	35.0579
	0.45904	0.971794	14.4303	34.8577
	0.460373	0.973225	14.3177	34.6588
	0.461707	0.974655	14.2062	34.4609
	0.46304	0.975609	14.0955	34.263
	0.464373	0.976086	13.9863	34.0661
	0.465707	0.977516	13.8776	33.8697
	0.46704	0.978947	13.7684	33.6746
	0.468373	0.981331	13.6587	33.481
	0.469707	0.983238	13.55	33.2889
	0.47104	0.986099	13.4423	33.0972
	0.472373	0.989437	13.335	32.906
	0.473707	0.992298	13.2296	32.7143
	0.47504	0.994205	13.1252	32.5216
	0.476373	0.995159	13.0222	32.329
	0.477707	0.995636	12.9197	32.1368
	0.47904	0.996113	12.8171	31.9466
	0.480373	0.997066	12.7151	31.7577
	0.481707	0.998974	12.6145	31.5703
	0.48304	1.00088	12.5143	31.3849
	0.484373	1.00374	12.4142	31.1994
	0.485707	1.0066	12.3141	31.0144
	0.48704	1.01042	12.2144	30.8298
	0.488373	1.01376	12.1152	30.6457
	0.489707	1.01709	12.0156	30.4622
	0.49104	1.02043	11.9159	30.2795
	0.492373	1.02282	11.8172	30.0974
	0.493707	1.02472	11.7199	29.9167
	0.49504	1.02568	11.6236	29.7359
	0.496373	1.02663	11.5278	29.5557
	0.497707	1.02758	11.4314	29.3759
	0.49904	1.02902	11.3366	29.1971
	0.500373	1.0314	11.2421	29.0193
	0.501707	1.03331	11.1487	28.8424
	0.50304	1.03474	11.0557	28.6669
	0.504373	1.03617	10.9632	28.4928
	0.505707	1.03807	10.8716	28.3197
	0.50704	1.03998	10.7801	28.1467
	0.508373	1.04237	10.6885	27.974
	0.509707	1.0457	10.597	27.8009
	0.51104	1.04952	10.5059	27.6274
	0.512373	1.05381	10.4158	27.4538
	0.513707	1.05715	10.3266	27.2807
	0.51504	1.05953	10.2389	27.1086
	0.516373	1.06049	10.1521	26.9383
	0.517707	1.06192	10.0663	26.7691
	0.51904	1.06382	9.98091	26.6017
	0.520373	1.06573	9.89508	26.4353
	0.521707	1.06716	9.80925	26.2708
	0.52304	1.06811	9.72342	26.1072
	0.524373	1.07002	9.63806	25.9441
	0.525707	1.07193	9.55366	25.7806
	0.52704	1.07288	9.47021	25.6185
	0.528373	1.07336	9.3882	25.4559
	0.529707	1.07384	9.30714	25.2933
	0.53104	1.07574	9.22655	25.1311
	0.532373	1.07861	9.1474	24.9695
	0.533707	1.08147	9.06824	24.8093
	0.53504	1.08433	8.98861	24.649
	0.536373	1.08767	8.90945	24.4903
	0.537707	1.09196	8.83125	24.3324
	0.53904	1.09529	8.75258	24.1756
	0.540373	1.09816	8.67342	24.0201
	0.541707	1.10006	8.59474	23.8656
	0.54304	1.10292	8.51702	23.7125
	0.544373	1.10531	8.43977	23.5604
	0.545707	1.10722	8.36395	23.4083
	0.54704	1.10865	8.28957	23.2576
	0.548373	1.11055	8.21661	23.1084
	0.549707	1.11198	8.14461	22.9601
	0.55104	1.11294	8.0726	22.8128
	0.552373	1.11342	8.00108	22.6664
	0.553707	1.11437	7.92955	22.5205
	0.55504	1.11675	7.85755	22.375
	0.556373	1.11914	7.7865	22.2291
	0.557707	1.12247	7.71593	22.0832
	0.55904	1.12581	7.64631	21.9387
	0.560373	1.12915	7.57765	21.7952
	0.561707	1.13249	7.50851	21.6531
	0.56304	1.13583	7.43889	21.511
	0.564373	1.13869	7.36927	21.3689
	0.565707	1.14155	7.29965	21.2273
	0.56704	1.14441	7.22908	21.0857
	0.568373	1.14632	7.15899	20.9445
	0.569707	1.14727	7.08984	20.8034
	0.57104	1.14775	7.02166	20.6641
	0.572373	1.14775	6.95395	20.5268
	0.573707	1.14775	6.88624	20.3919
	0.57504	1.14822	6.81852	20.2579
	0.576373	1.14918	6.75034	20.1248
	0.577707	1.15108	6.68167	19.9913
	0.57904	1.15347	6.61301	19.8568
	0.580373	1.15633	6.54577	19.7224
	0.581707	1.15871	6.47949	19.5884
	0.58304	1.16158	6.41464	19.4539
	0.584373	1.16396	6.35075	19.3209
	0.585707	1.16682	6.28733	19.1888
	0.58704	1.17016	6.22391	19.0581
	0.588373	1.17254	6.16049	18.928
	0.589707	1.17445	6.09755	18.7968
	0.59104	1.17588	6.03603	18.6662
	0.592373	1.17731	5.97452	18.5365
	0.593707	1.17874	5.91349	18.4082
	0.59504	1.18017	5.85341	18.2814
	0.596373	1.18256	5.7938	18.1555
	0.597707	1.18542	5.7342	18.0301
	0.59904	1.18828	5.67459	17.9061
	0.600373	1.19066	5.61546	17.7826
	0.601707	1.19305	5.55729	17.6591
	0.60304	1.194	5.49911	17.5346
	0.604373	1.194	5.44046	17.4111
	0.605707	1.19448	5.38181	17.2876
	0.60704	1.19495	5.32412	17.1641
	0.608373	1.19543	5.26737	17.0402
	0.609707	1.19686	5.21158	16.9181
	0.61104	1.19924	5.15675	16.7979
	0.612373	1.20211	5.10286	16.6782
	0.613707	1.20497	5.04993	16.5595
	0.61504	1.20735	4.99653	16.4422
	0.616373	1.21069	4.94217	16.3263
	0.617707	1.21355	4.88733	16.2109
	0.61904	1.21593	4.83345	16.0955
	0.620373	1.21737	4.78052	15.9816
	0.621707	1.2188	4.72807	15.869
	0.62304	1.22023	4.67609	15.7575
	0.624373	1.2207	4.6246	15.6454
	0.625707	1.22118	4.57405	15.5334
	0.62704	1.22213	4.52351	15.4227
	0.628373	1.22356	4.47344	15.3121
	0.629707	1.22643	4.42289	15.2024
	0.63104	1.22881	4.3733	15.0937
	0.632373	1.23167	4.32419	14.986
	0.633707	1.23453	4.27555	14.8777
	0.63504	1.23692	4.22691	14.7695
	0.636373	1.23835	4.17875	14.6622
	0.637707	1.23978	4.13155	14.5544
	0.63904	1.24168	4.08386	14.4476
	0.640373	1.24359	4.03618	14.3408
	0.641707	1.24645	3.98945	14.2349
	0.64304	1.25027	3.9432	14.13
	0.644373	1.25503	3.89742	14.0251
	0.645707	1.25933	3.85117	13.9202
	0.64704	1.26219	3.80444	13.8153
	0.648373	1.26409	3.75771	13.7118
	0.649707	1.266	3.7105	13.6093
	0.65104	1.26743	3.66282	13.5082
	0.652373	1.26886	3.61561	13.4081
	0.653707	1.27029	3.56935	13.3084
	0.65504	1.27125	3.52453	13.2093
	0.656373	1.27268	3.48066	13.1101
	0.657707	1.27363	3.43727	13.0109
	0.65904	1.27506	3.39436	12.9122
	0.660373	1.27697	3.35001	12.8144
	0.661707	1.27935	3.30566	12.7181
	0.66304	1.28222	3.26132	12.6227
	0.664373	1.28603	3.2184	12.5283
	0.665707	1.2908	3.17597	12.4344
	0.66704	1.29509	3.13353	12.34
	0.668373	1.29843	3.093	12.2456
	0.669707	1.30129	3.05342	12.1507
	0.67104	1.30367	3.01384	12.0543
	0.672373	1.3051	2.97474	11.9585
	0.673707	1.30558	2.93516	11.8631
	0.67504	1.30653	2.89606	11.7683
	0.676373	1.30892	2.85744	11.6743
	0.677707	1.31178	2.81881	11.5808
	0.67904	1.31416	2.77971	11.4874
	0.680373	1.31655	2.74109	11.3949
	0.681707	1.31893	2.7039	11.3029
	0.68304	1.32132	2.66718	11.2118
	0.684373	1.32275	2.63046	11.1231
	0.685707	1.32465	2.59422	11.0363
	0.68704	1.32656	2.55798	10.9505
	0.688373	1.32847	2.52174	10.8661
	0.689707	1.33038	2.48598	10.7826
	0.69104	1.33085	2.4507	10.6987
	0.692373	1.33133	2.41589	10.6143
	0.693707	1.33133	2.3806	10.529
	0.69504	1.33228	2.34531	10.4441
	0.696373	1.33371	2.31051	10.3597
	0.697707	1.3361	2.27474	10.2753
	0.69904	1.33848	2.2385	10.1913
	0.700373	1.34087	2.20131	10.1084
	0.701707	1.34325	2.16459	10.0264
	0.70304	1.34516	2.12788	9.94578
	0.704373	1.34659	2.09259	9.86614
	0.705707	1.34802	2.05826	9.78747
	0.70704	1.34945	2.02536	9.70927
	0.708373	1.35231	1.99436	9.6325
	0.709707	1.35517	1.96337	9.5562
	0.71104	1.35899	1.93333	9.48038
	0.712373	1.36137	1.90186	9.40457
	0.713707	1.3628	1.87086	9.32875
	0.71504	1.36328	1.83939	9.25246
	0.716373	1.36423	1.8084	9.17616
	0.717707	1.36423	1.77788	9.09987
	0.71904	1.36519	1.74784	9.02405
	0.720373	1.36614	1.71827	8.94776
	0.721707	1.36805	1.68919	8.87051
	0.72304	1.37091	1.6601	8.79421
	0.724373	1.37329	1.63149	8.7184
	0.725707	1.37472	1.60288	8.64306
	0.72704	1.37615	1.57427	8.56819
	0.728373	1.37758	1.54614	8.49381
	0.729707	1.37854	1.51848	8.42133
	0.73104	1.37997	1.49035	8.35028
	0.732373	1.3814	1.46174	8.27971
	0.733707	1.38331	1.43312	8.20866
	0.73504	1.38617	1.40451	8.13761
	0.736373	1.38855	1.37495	8.06656
	0.737707	1.39046	1.34539	7.99599
	0.73904	1.39189	1.31582	7.92494
	0.740373	1.39427	1.28626	7.85389
	0.741707	1.39713	1.25765	7.78332
	0.74304	1.39999	1.23047	7.71275
	0.744373	1.40333	1.20424	7.64218
	0.745707	1.40667	1.17849	7.57256
	0.74704	1.41048	1.15322	7.50389
	0.748373	1.41335	1.1289	7.43523
	0.749707	1.41525	1.10506	7.36752
	0.75104	1.41716	1.08122	7.30028
	0.752373	1.42002	1.05642	7.234
	0.753707	1.42288	1.03115	7.1682
	0.75504	1.42527	1.00683	7.1024
	0.756373	1.42717	0.982991	7.03659
	0.757707	1.4286	0.959626	6.97174
	0.75904	1.42908	0.936261	6.90737
	0.760373	1.42956	0.913372	6.84252
	0.761707	1.42956	0.891438	6.77862
	0.76304	1.43051	0.86998	6.71521
	0.764373	1.4329	0.848522	6.65226
	0.765707	1.43623	0.827065	6.5898
	0.76704	1.43862	0.80513	6.52829
	0.768373	1.441	0.784149	6.46725
	0.769707	1.44386	0.764122	6.40669
	0.77104	1.44672	0.744095	6.34613
	0.772373	1.44911	0.723591	6.28605
	0.773707	1.45101	0.703087	6.22549
	0.77504	1.4534	0.682583	6.16493
	0.776373	1.45626	0.662556	6.1039
	0.777707	1.45912	0.642052	6.04382
	0.77904	1.46151	0.622025	5.98517
	0.780373	1.46294	0.602475	5.92747
	0.781707	1.46484	0.584355	5.87073
	0.78304	1.46675	0.566235	5.81446
	0.784373	1.46961	0.547638	5.75819
	0.785707	1.47247	0.528088	5.70097
	0.78704	1.47486	0.507584	5.64328
	0.788373	1.47772	0.48708	5.5851
	0.789707	1.4801	0.466099	5.52836
	0.79104	1.48344	0.446072	5.47161
	0.792373	1.4863	0.426998	5.4163
	0.793707	1.48869	0.410309	5.36099
	0.79504	1.49059	0.39362	5.3071
	0.796373	1.4925	0.377884	5.2537
	0.797707	1.49488	0.362149	5.20077
	0.79904	1.49632	0.34689	5.14879
	0.800373	1.49775	0.331154	5.09777
	0.801707	1.4987	0.314942	5.04675
	0.80304	1.49965	0.298729	4.99525
	0.804373	1.50108	0.283947	4.9428
	0.805707	1.50251	0.269642	4.89035
	0.80704	1.50442	0.254383	4.8379
	0.808373	1.50633	0.240078	4.78592
	0.809707	1.50871	0.22625	4.7349
	0.81104	1.51157	0.213375	4.68483
	0.812373	1.51396	0.199547	4.63524
	0.813707	1.51587	0.185719	4.58708
	0.81504	1.51777	0.171891	4.5394
	0.816373	1.5192	0.158062	4.49124
	0.817707	1.52111	0.143757	4.4426
	0.81904	1.52302	0.128975	4.39444
	0.820373	1.5254	0.11467	4.34628
	0.821707	1.52874	0.101796	4.29859
	0.82304	1.53208	0.090828	4.25091
	0.824373	1.53542	0.080815	4.20418
	0.825707	1.53875	0.070801	4.15793
	0.82704	1.54209	0.060788	4.11167
	0.828373	1.54543	0.050297	4.06542
	0.829707	1.54686	0.038853	4.01821
	0.83104	1.54829	0.026932	3.97148
	0.832373	1.5502	0.015011	3.9238
	0.833707	1.55211	0.00309	3.87659
	0.83504	1.55354	-0.00835	3.83034
	0.836373	1.55497	-0.01837	3.78409
	0.837707	1.5583	-0.0279	3.73831
	0.83904	1.56164	-0.03696	3.69349
	0.840373	1.56403	-0.04555	3.64962
	0.841707	1.56641	-0.05365	3.60623
	0.84304	1.56832	-0.06033	3.56284
	0.844373	1.56975	-0.06748	3.5204
	0.845707	1.57022	-0.07559	3.47844
	0.84704	1.57118	-0.08417	3.43695
	0.848373	1.57261	-0.09275	3.39547
	0.849707	1.57499	-0.10181	3.35398
	0.85104	1.57738	-0.11135	3.3125
	0.852373	1.58024	-0.12041	3.27149
	0.853707	1.58215	-0.12899	3.23048
	0.85504	1.58453	-0.13615	3.18995
	0.856373	1.58644	-0.14282	3.14942
	0.857707	1.58787	-0.14854	3.10936
	0.85904	1.58977	-0.15474	3.06931
	0.860373	1.59216	-0.16142	3.03021
	0.861707	1.5955	-0.16809	2.99063
	0.86304	1.59836	-0.17525	2.95105
	0.864373	1.6017	-0.18335	2.91147
	0.865707	1.60456	-0.19146	2.8719
	0.86704	1.60694	-0.19909	2.8328
	0.868373	1.60885	-0.20529	2.79322
	0.869707	1.61076	-0.21053	2.75364
	0.87104	1.61219	-0.2153	2.71407
	0.872373	1.61314	-0.21912	2.67449
	0.873707	1.61409	-0.22293	2.63539
	0.87504	1.61552	-0.22627	2.59724
	0.876373	1.61695	-0.23008	2.56005
	0.877707	1.61886	-0.23437	2.52476
	0.87904	1.62077	-0.23867	2.489
	0.880373	1.62363	-0.24296	2.45323
	0.881707	1.62601	-0.24677	2.417
	0.88304	1.62888	-0.25106	2.38076
	0.884373	1.63174	-0.25488	2.34499
	0.885707	1.6346	-0.25917	2.30923
	0.88704	1.63651	-0.26394	2.27442
	0.888373	1.63841	-0.26918	2.24057
	0.889707	1.63937	-0.27395	2.20719
	0.89104	1.6408	-0.27824	2.17333
	0.892373	1.64223	-0.2811	2.13948
	0.893707	1.64413	-0.28254	2.10562
	0.89504	1.64604	-0.28397	2.07224
	0.896373	1.64843	-0.28444	2.03934
	0.897707	1.65081	-0.28492	2.00691
	0.89904	1.65415	-0.28587	1.97449
	0.900373	1.65653	-0.28683	1.94254
	0.901707	1.65892	-0.28683	1.91012
	0.90304	1.66082	-0.28683	1.87769
	0.904373	1.66273	-0.2873	1.84527
	0.905707	1.66511	-0.28778	1.81332
	0.90704	1.66702	-0.28778	1.78089
	0.908373	1.66941	-0.28826	1.74895
	0.909707	1.67227	-0.28969	1.71748
	0.91104	1.67513	-0.29064	1.686
	0.912373	1.67751	-0.29112	1.65501
	0.913707	1.68037	-0.29016	1.62449
	0.91504	1.68324	-0.28921	1.59493
	0.916373	1.68562	-0.28826	1.56584
	0.917707	1.68848	-0.28683	1.53771
	0.91904	1.69039	-0.28587	1.50957
	0.920373	1.6923	-0.28492	1.48144
	0.921707	1.69373	-0.28397	1.45283
	0.92304	1.69516	-0.28254	1.42422
	0.924373	1.69706	-0.28158	1.39513
	0.925707	1.69897	-0.2811	1.367
	0.92704	1.70135	-0.27967	1.33887
	0.928373	1.70469	-0.27824	1.31121
	0.929707	1.70755	-0.27729	1.28355
	0.93104	1.71042	-0.27634	1.25542
	0.932373	1.71232	-0.27491	1.22681
	0.933707	1.71375	-0.273	1.1982
	0.93504	1.71518	-0.27109	1.17007
	0.936373	1.71661	-0.27014	1.14289
	0.937707	1.71804	-0.26823	1.11714
	0.93904	1.71948	-0.26489	1.09139
	0.940373	1.72138	-0.2606	1.06564
	0.941707	1.72281	-0.25536	1.04037
	0.94304	1.72424	-0.24963	1.01462
	0.944373	1.7252	-0.24439	0.988391
	0.945707	1.72567	-0.23962	0.962165
	0.94704	1.7271	-0.23676	0.936893
	0.948373	1.72901	-0.23437	0.912574
	0.949707	1.73092	-0.23247	0.888732
	0.95104	1.73235	-0.23008	0.86489
	0.952373	1.73473	-0.22722	0.841525
	0.953707	1.73712	-0.22341	0.818637
	0.95504	1.74046	-0.21959	0.795272
	0.956373	1.74379	-0.21578	0.772384
	0.957707	1.74666	-0.21244	0.750449
	0.95904	1.74856	-0.20958	0.728515
	0.960373	1.75095	-0.20672	0.706103
	0.961707	1.75285	-0.2029	0.683692
	0.96304	1.75476	-0.19861	0.661281
	0.964373	1.75667	-0.19384	0.639823
	0.965707	1.75905	-0.18908	0.617888
	0.96704	1.76144	-0.18335	0.595954
	0.968373	1.76334	-0.17763	0.574973
	0.969707	1.76525	-0.17239	0.554946
	0.97104	1.76716	-0.16762	0.535396
	0.972373	1.76907	-0.16333	0.514415
	0.973707	1.77193	-0.15856	0.493911
	0.97504	1.77527	-0.15331	0.473884
	0.976373	1.77813	-0.14854	0.453857
	0.977707	1.78099	-0.14235	0.434306
	0.97904	1.78289	-0.13519	0.414756
	0.980373	1.7848	-0.12756	0.395682
	0.981707	1.78623	-0.11993	0.376609
	0.98304	1.78814	-0.1123	0.357059
	0.984373	1.791	-0.10563	0.337985
	0.985707	1.79386	-0.10038	0.319388
	0.98704	1.7972	-0.09514	0.301269
	0.988373	1.80054	-0.08989	0.283149
	0.989707	1.80387	-0.0856	0.265029
	0.99104	1.80674	-0.08083	0.247386
	0.992373	1.80864	-0.07511	0.229743
	0.993707	1.81055	-0.06891	0.210193
	0.99504	1.81246	-0.06271	0.191119
	0.996373	1.81389	-0.05651	0.172523
	0.997707	1.81484	-0.04936	0.155833
	0.99904	1.81675	-0.04221	0.139621
	1.00037	1.81913	-0.03458	0.124362
	1.00171	1.82152	-0.02743	0.110057
	1.00304	1.82343	-0.02027	0.097182
	1.00437	1.82581	-0.0136	0.084785
	1.00571	1.82915	-0.00692	0.071433
	1.00704	1.83296	0.000706	0.057605
	1.00837	1.83725	0.007859	0.043777
	1.00971	1.84202	0.015965	0.029948
	1.01104	1.84679	0.023594	0.01612
	1.01237	1.85156	0.031224	0.001815
	1.01371	1.85537	0.03933	-0.01058
	1.01504	1.85776	0.04839	-0.02107
	1.01637	1.86014	0.056973	-0.03061
	1.01771	1.86253	0.065079	-0.04015
	1.01904	1.86634	0.073662	-0.04921
	1.02037	1.87016	0.082722	-0.05731
	1.02171	1.87445	0.090828	-0.06685
	1.02304	1.87874	0.098458	-0.07734
	1.02437	1.88303	0.106087	-0.08831
	1.02571	1.88685	0.114193	-0.09832
	1.02704	1.89066	0.123253	-0.10738
	1.02837	1.89495	0.13279	-0.11549
	1.02971	1.89924	0.142803	-0.12312
	1.03104	1.90449	0.152817	-0.12932
	1.03237	1.90973	0.161877	-0.13408
	1.03371	1.91498	0.169983	-0.13838
	1.03504	1.9207	0.178089	-0.14219
	1.03637	1.92547	0.187149	-0.146
	1.03771	1.93024	0.196209	-0.1503
	1.03904	1.93548	0.205746	-0.15411
	1.04037	1.9412	0.21576	-0.15888
	1.04171	1.94645	0.225296	-0.16269
	1.04304	1.95169	0.234356	-0.16651
	1.04437	1.95694	0.241986	-0.16937
	1.04571	1.96219	0.249138	-0.17271
	1.04704	1.96695	0.256768	-0.17509
	1.04837	1.97172	0.264397	-0.17795
	1.04971	1.97697	0.271073	-0.18034
	1.05104	1.98174	0.278225	-0.18224
	1.05237	1.9865	0.285855	-0.18367
	1.05371	1.99127	0.293484	-0.18415
	1.05504	1.99604	0.30159	-0.18415
	1.05637	2.00033	0.310173	-0.18367
	1.05771	2.00367	0.320187	-0.18224
	1.05904	2.00796	0.329724	-0.18034
	1.06037	2.01321	0.338784	-0.17795
	1.06171	2.01893	0.346413	-0.17461
	1.06304	2.02513	0.353566	-0.1708
	1.06437	2.03133	0.360718	-0.16699
	1.06571	2.03753	0.368347	-0.16317
	1.06704	2.0442	0.375977	-0.15936
	1.06837	2.04945	0.384083	-0.15554
	1.06971	2.05421	0.391236	-0.15125
	1.07104	2.05898	0.398865	-0.14744
	1.07237	2.06423	0.405541	-0.14362
	1.07371	2.07043	0.41174	-0.13981
	1.07504	2.0771	0.417462	-0.13504
	1.07637	2.08473	0.422707	-0.13027
	1.07771	2.09284	0.428429	-0.12502
	1.07904	2.10047	0.435582	-0.11882
	1.08037	2.10762	0.443211	-0.11215
	1.08171	2.1143	0.451317	-0.10452
	1.08304	2.11954	0.458947	-0.09737
	1.08437	2.12526	0.467053	-0.09069
	1.08571	2.13098	0.474682	-0.08402
	1.08704	2.13766	0.481358	-0.07639
	1.08837	2.14434	0.488034	-0.0678
	1.08971	2.15054	0.494232	-0.05922
	1.09104	2.15769	0.500908	-0.04968
	1.09237	2.16532	0.507107	-0.03919
	1.09371	2.17342	0.513306	-0.0287
	1.09504	2.18153	0.519505	-0.01821
	1.09637	2.19059	0.526181	-0.00868
	1.09771	2.2006	0.532856	0.000861
	1.09904	2.21109	0.540009	0.010875
	1.10037	2.22063	0.547161	0.021365
	1.10171	2.22969	0.554314	0.031856
	1.10304	2.23923	0.561467	0.041869
	1.10437	2.24781	0.568142	0.051883
	1.10571	2.25592	0.574341	0.06142
	1.10704	2.26355	0.580063	0.070479
	1.10837	2.2707	0.585308	0.078109
	1.10971	2.27833	0.590554	0.084308
	1.11104	2.28643	0.595799	0.09003
	1.11237	2.29406	0.601044	0.096229
	1.11371	2.30217	0.605812	0.102904
	1.11504	2.3098	0.610581	0.10815
	1.11637	2.31648	0.614872	0.112918
	1.11771	2.32267	0.61821	0.117686
	1.11904	2.32744	0.620594	0.121978
	1.12037	2.33126	0.621071	0.125793
	1.12171	2.3346	0.619641	0.12913
	1.12304	2.33793	0.617256	0.132468
	1.12437	2.34175	0.614872	0.13676
	1.12571	2.34604	0.612488	0.140574
	1.12704	2.35033	0.609627	0.142959
	1.12837	2.35462	0.607243	0.144389
	1.12971	2.35796	0.604382	0.143912
	1.13104	2.36082	0.602475	0.142005
	1.13237	2.36225	0.60009	0.140098
	1.13371	2.3632	0.597229	0.137713
	1.13504	2.36416	0.593891	0.135329
	1.13637	2.36463	0.589123	0.132945
	1.13771	2.36463	0.583878	0.129607
	1.13904	2.36463	0.577202	0.125793
	1.14037	2.36511	0.569573	0.122455
	1.14171	2.36559	0.56099	0.119117
	1.14304	2.36559	0.552407	0.116256
	1.14437	2.36463	0.543824	0.112918
	1.14571	2.36463	0.53524	0.109103
	1.14704	2.36463	0.527134	0.105289
	1.14837	2.36416	0.519505	0.100997
	1.14971	2.3632	0.511399	0.095752
	1.15104	2.36273	0.502339	0.089553
	1.15237	2.36225	0.493279	0.083831
	1.15371	2.36082	0.483265	0.078586
	1.15504	2.35891	0.472775	0.073817
	1.15637	2.35605	0.462284	0.069049
	1.15771	2.35414	0.452271	0.064281
	1.15904	2.35224	0.444165	0.059989
	1.16037	2.35081	0.435582	0.055221
	1.16171	2.34938	0.426998	0.051406
	1.16304	2.34842	0.417462	0.047591
	1.16437	2.34747	0.406971	0.043777
	1.16571	2.34652	0.395527	0.039962
	1.16704	2.34461	0.383129	0.036147
	1.16837	2.34175	0.370255	0.032809
	1.16971	2.33889	0.358811	0.028995
	1.17104	2.33746	0.347843	0.025657
	1.17237	2.33698	0.337353	0.021842
	1.17371	2.33746	0.326863	0.018027
	1.17504	2.33793	0.316849	0.014213
	1.17637	2.33889	0.306835	0.010875
	1.17771	2.34079	0.296822	0.007537
	1.17904	2.3427	0.286331	0.005153
	1.18037	2.34318	0.275841	0.002769
	1.18171	2.34318	0.264874	0.001338
	1.18304	2.3427	0.25343	0.000861
	1.18437	2.3427	0.241986	-0.00057
	1.18571	2.34175	0.229588	-0.00105
	1.18704	2.33984	0.21719	-0.00152
	1.18837	2.33746	0.204792	-0.00152
	1.18971	2.33555	0.192395	-0.00152
	1.19104	2.33364	0.179043	-0.00152
	1.19237	2.33221	0.166169	-0.00105
	1.19371	2.33126	0.153771	-0.00105
	1.19504	2.33173	0.141373	-0.00152
	1.19637	2.33316	0.129452	-0.00248
	1.19771	2.33507	0.118485	-0.00295
	1.19904	2.33698	0.107518	-0.00295
	1.20037	2.33841	0.095597	-0.00343
	1.20171	2.34032	0.083199	-0.00343
	1.20304	2.34079	0.070324	-0.00343
	1.20437	2.34079	0.05745	-0.00295
	1.20571	2.34127	0.045052	-0.00295
	1.20704	2.3427	0.034085	-0.00295
	1.20837	2.34461	0.023117	-0.00248
	1.20971	2.34699	0.011673	-0.00105
	1.21104	2.34938	0.000229	0.000384
	1.21237	2.35176	-0.01169	0.002769
	1.21371	2.35414	-0.02361	0.00563
	1.21504	2.35605	-0.03601	0.008967
	1.21637	2.35748	-0.04841	0.011352
	1.21771	2.35796	-0.06033	0.014213
	1.21904	2.35891	-0.07225	0.017074
	1.22037	2.35939	-0.0856	0.019458
	1.22171	2.35987	-0.09991	0.022319
	1.22304	2.36082	-0.11421	0.025657
	1.22437	2.36177	-0.12852	0.028518
	1.22571	2.36368	-0.14282	0.030425
	1.22704	2.36607	-0.1576	0.031856
	1.22837	2.36845	-0.17286	0.033286
	1.22971	2.37036	-0.18764	0.035193
	1.23104	2.37179	-0.2029	0.037578
	1.23237	2.3737	-0.21816	0.040439
	1.23371	2.3756	-0.23294	0.045207
	1.23504	2.37751	-0.2463	0.050452
	1.23637	2.37942	-0.25965	0.055697
	1.23771	2.38132	-0.27204	0.059989
	1.23904	2.38323	-0.28492	0.064281
	1.24037	2.38466	-0.29827	0.067618
	1.24171	2.38609	-0.31258	0.070003
	1.24304	2.388	-0.32688	0.07191
	1.24437	2.39086	-0.34071	0.07334
	1.24571	2.39515	-0.35406	0.075725
	1.24704	2.39945	-0.36789	0.078586
	1.24837	2.40421	-0.38219	0.08097
	1.24971	2.40898	-0.39555	0.084785
	1.25104	2.41327	-0.40937	0.089076
	1.25237	2.41566	-0.4232	0.094798
	1.25371	2.41756	-0.43703	0.100043
	1.25504	2.41852	-0.45038	0.105289
	1.25637	2.41899	-0.46373	0.111487
	1.25771	2.41899	-0.47661	0.116256
	1.25904	2.41899	-0.48948	0.119594
	1.26037	2.41995	-0.50283	0.122932
	1.26171	2.42138	-0.51666	0.126269
	1.26304	2.42424	-0.53049	0.130084
	1.26437	2.42806	-0.54384	0.134376
	1.26571	2.43235	-0.55719	0.138667
	1.26704	2.43664	-0.57054	0.142005
	1.26837	2.44093	-0.5839	0.14582
	1.26971	2.44522	-0.59725	0.148204
	1.27104	2.44808	-0.61012	0.150588
	1.27237	2.45094	-0.62347	0.152972
	1.27371	2.45333	-0.6373	0.156787
	1.27504	2.45571	-0.65161	0.162032
	1.27637	2.45762	-0.66639	0.168231
	1.27771	2.45953	-0.68165	0.17443
	1.27904	2.46239	-0.69643	0.179675
	1.28037	2.46525	-0.71169	0.183967
	1.28171	2.46811	-0.72647	0.187305
	1.28304	2.47097	-0.74125	0.189689
	1.28437	2.47431	-0.75508	0.190642
	1.28571	2.4786	-0.76939	0.19255
	1.28704	2.48337	-0.78464	0.195888
	1.28837	2.48814	-0.80086	0.199225
	1.28971	2.49243	-0.81612	0.202563
	1.29104	2.49624	-0.83042	0.205424
	1.29237	2.49958	-0.84473	0.208285
	1.29371	2.50339	-0.85999	0.21067
	1.29504	2.50673	-0.87477	0.213531
	1.29637	2.51055	-0.88955	0.216392
	1.29771	2.51436	-0.90481	0.220206
	1.29904	2.51865	-0.92007	0.224975
	1.30037	2.52294	-0.93437	0.229743
	1.30171	2.52676	-0.94725	0.233558
	1.30304	2.52962	-0.9606	0.236419
	1.30437	2.53248	-0.973	0.238326
	1.30571	2.53487	-0.98444	0.239757
	1.30704	2.5382	-0.99588	0.241664
	1.30837	2.54154	-1.00828	0.244525
	1.30971	2.54536	-1.02163	0.24834
	1.31104	2.54965	-1.03498	0.251678
	1.31237	2.55442	-1.04929	0.255492
	1.31371	2.55966	-1.06407	0.259307
	1.31504	2.56491	-1.07885	0.262168
	1.31637	2.5692	-1.09268	0.264552
	1.31771	2.57349	-1.10603	0.26646
	1.31904	2.57873	-1.11843	0.268844
	1.32037	2.5835	-1.13131	0.270274
	1.32171	2.58779	-1.14418	0.272182
	1.32304	2.59256	-1.15753	0.274089
	1.32437	2.59733	-1.16993	0.276473
	1.32571	2.6021	-1.1828	0.278857
	1.32704	2.60639	-1.19568	0.281241
	1.32837	2.60973	-1.20903	0.283626
	1.32971	2.61307	-1.2219	0.28601
	1.33104	2.6164	-1.23478	0.28744
	1.33237	2.6207	-1.24908	0.288871
	1.33371	2.62547	-1.26339	0.289825
	1.33504	2.63071	-1.27865	0.291255
	1.33637	2.63643	-1.29391	0.292686
	1.33771	2.64311	-1.30917	0.293639
	1.33904	2.64978	-1.32395	0.294116
	1.34037	2.65598	-1.33873	0.294593
	1.34171	2.66218	-1.35351	0.295547
	1.34304	2.6679	-1.36734	0.296977
	1.34437	2.67315	-1.38069	0.297931
	1.34571	2.67792	-1.39404	0.299838
	1.34704	2.68221	-1.40787	0.301745
	1.34837	2.6865	-1.42122	0.303653
	1.34971	2.69127	-1.4341	0.305083
	1.35104	2.69651	-1.44745	0.305083
	1.35237	2.70128	-1.45985	0.30556
	1.35371	2.70653	-1.47224	0.306037
	1.35504	2.71225	-1.48464	0.306514
	1.35637	2.71797	-1.49752	0.307467
	1.35771	2.72322	-1.50991	0.308421
	1.35904	2.72894	-1.52231	0.309852
	1.36037	2.73466	-1.53423	0.310329
	1.36171	2.73991	-1.54568	0.310329
	1.36304	2.74467	-1.55664	0.308898
	1.36437	2.74897	-1.56761	0.307467
	1.36571	2.75373	-1.57858	0.306037
	1.36704	2.75898	-1.59002	0.305083
	1.36837	2.7647	-1.60147	0.304606
	1.36971	2.77138	-1.61291	0.304606
	1.37104	2.77853	-1.62436	0.304606
	1.37237	2.78521	-1.6358	0.30413
	1.37371	2.79236	-1.64677	0.303176
	1.37504	2.79903	-1.65773	0.301745
	1.37637	2.80476	-1.6687	0.300792
	1.37771	2.81095	-1.67967	0.299361
	1.37904	2.81715	-1.69064	0.297931
	1.38037	2.82335	-1.70113	0.296977
	1.38171	2.8286	-1.71209	0.296023
	1.38304	2.8348	-1.72306	0.295547
	1.38437	2.84147	-1.73355	0.294593
	1.38571	2.84863	-1.74499	0.294116
	1.38704	2.85578	-1.75549	0.294116
	1.38837	2.86293	-1.76598	0.294116
	1.38971	2.87008	-1.77504	0.293639
	1.39104	2.87676	-1.78314	0.292209
	1.39237	2.88248	-1.79172	0.289825
	1.39371	2.88868	-1.80078	0.286964
	1.39504	2.89535	-1.8108	0.283149
	1.39637	2.90251	-1.82081	0.279811
	1.39771	2.90918	-1.8313	0.276473
	1.39904	2.91634	-1.84227	0.273612
	1.40037	2.92301	-1.85276	0.271228
	1.40171	2.92969	-1.86277	0.269321
	1.40304	2.93589	-1.87279	0.26646
	1.40437	2.94209	-1.88328	0.264075
	1.40571	2.94924	-1.89329	0.261214
	1.40704	2.95734	-1.9033	0.25883
	1.40837	2.96545	-1.91332	0.2574
	1.40971	2.97403	-1.92381	0.256446
	1.41104	2.98309	-1.93191	0.255969
	1.41237	2.99215	-1.93954	0.254062
	1.41371	3.00074	-1.94765	0.251678
	1.41504	3.00932	-1.95576	0.24834
	1.41637	3.01743	-1.96434	0.245002
	1.41771	3.02601	-1.97292	0.241187
	1.41904	3.03364	-1.98198	0.237849
	1.42037	3.04079	-1.99152	0.236419
	1.42171	3.04842	-2.00106	0.235465
	1.42304	3.05653	-2.00964	0.234511
	1.42437	3.06463	-2.01679	0.232604
	1.42571	3.07321	-2.02394	0.229743
	1.42704	3.0818	-2.03062	0.225928
	1.42837	3.09086	-2.03777	0.221637
	1.42971	3.09944	-2.0454	0.216868
	1.43104	3.10755	-2.05351	0.213531
	1.43237	3.11613	-2.06161	0.21067
	1.43371	3.12567	-2.06829	0.207332
	1.43504	3.1352	-2.07401	0.204471
	1.43637	3.14379	-2.07878	0.20161
	1.43771	3.15285	-2.08307	0.198749
	1.43904	3.16238	-2.08689	0.194934
	1.44037	3.17097	-2.09118	0.191596
	1.44171	3.17907	-2.09642	0.187781
	1.44304	3.1867	-2.10262	0.184444
	1.44437	3.19529	-2.10834	0.181582
	1.44571	3.2053	-2.11454	0.178245
	1.44704	3.21531	-2.12122	0.17443
	1.44837	3.22485	-2.12742	0.170615
	1.44971	3.23534	-2.13362	0.165847
	1.45104	3.24631	-2.13886	0.161555
	1.45237	3.25727	-2.14411	0.157264
	1.45371	3.26729	-2.14935	0.153449
	1.45504	3.2773	-2.15412	0.150111
	1.45637	3.28731	-2.15841	0.146297
	1.45771	3.29781	-2.1627	0.143436
	1.45904	3.30877	-2.16747	0.141051
	1.46037	3.31879	-2.17176	0.139144
	1.46171	3.3288	-2.1751	0.135806
	1.46304	3.33977	-2.17701	0.131991
	1.46437	3.35121	-2.17844	0.128177
	1.46571	3.36266	-2.18082	0.124362
	1.46704	3.37315	-2.18368	0.120547
	1.46837	3.38316	-2.1875	0.117209
	1.46971	3.39365	-2.19179	0.113872
	1.47104	3.40414	-2.19656	0.110534
	1.47237	3.41463	-2.20133	0.107196
	1.47371	3.42512	-2.2061	0.103381
	1.47504	3.43752	-2.21039	0.099566
	1.47637	3.45039	-2.2142	0.095275
	1.47771	3.46327	-2.21802	0.09003
	1.47904	3.47614	-2.22088	0.085738
	1.48037	3.48902	-2.22326	0.0824
	1.48171	3.50094	-2.22517	0.079539
	1.48304	3.51238	-2.22612	0.076678
	1.48437	3.5243	-2.22708	0.073817
	1.48571	3.53527	-2.22898	0.07191
	1.48704	3.54624	-2.23185	0.070003
	1.48837	3.55768	-2.23614	0.068095
	1.48971	3.5696	-2.24043	0.065711
	1.49104	3.58057	-2.24472	0.063327
	1.49237	3.59154	-2.2471	0.060466
	1.49371	3.60203	-2.24806	0.057128
	1.49504	3.61347	-2.24853	0.052836
	1.49637	3.62492	-2.24901	0.047591
	1.49771	3.63731	-2.24853	0.042823
	1.49904	3.65019	-2.24806	0.038531
	1.50037	3.66354	-2.24806	0.035193
	1.50171	3.67737	-2.24758	0.032332
	1.50304	3.69072	-2.2471	0.029948
	1.50437	3.70312	-2.2471	0.027564
	1.50571	3.71504	-2.24663	0.025657
	1.50704	3.72648	-2.24663	0.023273
	1.50837	3.73936	-2.24615	0.020412
	1.50971	3.75319	-2.2452	0.017551
	1.51104	3.76844	-2.24377	0.014689
	1.51237	3.78513	-2.24091	0.012782
	1.51371	3.80135	-2.23804	0.010875
	1.51504	3.81708	-2.23423	0.008967
	1.51637	3.83186	-2.23042	0.00706
	1.51771	3.84617	-2.22565	0.004676
	1.51904	3.85952	-2.22088	0.002292
	1.52037	3.87192	-2.21754	-0.00057
	1.52171	3.88479	-2.2142	-0.00343
	1.52304	3.89814	-2.21182	-0.00629
	1.52437	3.91245	-2.20943	-0.0082
	1.52571	3.92771	-2.20657	-0.01011
	1.52704	3.94392	-2.20419	-0.01154
	1.52837	3.96061	-2.20037	-0.01249
	1.52971	3.97682	-2.19656	-0.01297
	1.53104	3.99303	-2.19274	-0.01344
	1.53237	4.00972	-2.18988	-0.01535
	1.53371	4.02641	-2.1875	-0.01774
	1.53504	4.04263	-2.18559	-0.02012
	1.53637	4.05836	-2.18368	-0.0225
	1.53771	4.0741	-2.18082	-0.02489
	1.53904	4.08983	-2.17701	-0.0268
	1.54037	4.10557	-2.17224	-0.02727
	1.54171	4.12035	-2.16747	-0.02775
	1.54304	4.13513	-2.16175	-0.02823
	1.54437	4.15087	-2.15698	-0.0287
	1.54571	4.16851	-2.15317	-0.02966
	1.54704	4.18711	-2.15031	-0.02966
	1.54837	4.20523	-2.14792	-0.02918
	1.54971	4.2243	-2.14458	-0.02775
	1.55104	4.24385	-2.14077	-0.02632
	1.55237	4.26245	-2.13552	-0.02489
	1.55371	4.27961	-2.12885	-0.02441
	1.55504	4.29678	-2.12265	-0.02489
	1.55637	4.31395	-2.1174	-0.02584
	1.55771	4.33254	-2.11168	-0.0268
	1.55904	4.35114	-2.10548	-0.02727
	1.56037	4.37021	-2.09976	-0.02727
	1.56171	4.39024	-2.09404	-0.0268
	1.56304	4.41027	-2.08641	-0.02489
	1.56437	4.42934	-2.07687	-0.02203
	1.56571	4.44794	-2.06734	-0.01964
	1.56704	4.46606	-2.0578	-0.01774
	1.56837	4.48465	-2.04922	-0.01535
	1.56971	4.50325	-2.03968	-0.01297
	1.57104	4.5228	-2.0311	-0.01011
	1.57237	4.54235	-2.02251	-0.0082
	1.57371	4.56238	-2.01536	-0.00581
	1.57504	4.58288	-2.00821	-0.00295
	1.57637	4.60386	-2.00058	0.000384
	1.57771	4.62437	-1.99247	0.003245
	1.57904	4.64535	-1.98389	0.006583
	1.58037	4.66633	-1.97483	0.009921
	1.58171	4.68779	-1.96434	0.013259
	1.58304	4.70877	-1.9529	0.01612
	1.58437	4.72975	-1.9405	0.018981
	1.58571	4.7512	-1.9281	0.021842
	1.58704	4.77409	-1.9157	0.024226
	1.58837	4.79698	-1.9033	0.026134
	1.58971	4.81939	-1.88995	0.029471
	1.59104	4.84133	-1.87708	0.033763
	1.59237	4.86374	-1.8642	0.039008
	1.59371	4.88615	-1.85133	0.044253
	1.59504	4.90761	-1.83798	0.049499
	1.59637	4.92907	-1.8251	0.054744
	1.59771	4.951	-1.81271	0.059989
	1.59904	4.97389	-1.80031	0.065234
	1.60037	4.99725	-1.78743	0.069526
	1.60171	5.02109	-1.77408	0.074294
	1.60304	5.04589	-1.76073	0.080016
	1.60437	5.07069	-1.7469	0.086692
	1.60571	5.09548	-1.73355	0.093368
	1.60704	5.1198	-1.71972	0.100043
	1.60837	5.1446	-1.70589	0.107673
	1.60971	5.16892	-1.69159	0.115779
	1.61104	5.19276	-1.67681	0.124362
	1.61237	5.21708	-1.66155	0.131991
	1.61371	5.24282	-1.64486	0.139621
	1.61504	5.26905	-1.62817	0.148204
	1.61637	5.29575	-1.61196	0.157264
	1.61771	5.32246	-1.59479	0.166324
	1.61904	5.35011	-1.57762	0.175384
	1.62037	5.37729	-1.56141	0.185397
	1.62171	5.404	-1.5452	0.195411
	1.62304	5.43165	-1.52994	0.205901
	1.62437	5.46026	-1.51516	0.215915
	1.62571	5.48983	-1.4999	0.225928
	1.62704	5.51939	-1.48464	0.235942
	1.62837	5.54895	-1.46938	0.245956
	1.62971	5.57756	-1.45317	0.2574
	1.63104	5.60665	-1.436	0.268844
	1.63237	5.63621	-1.41741	0.281241
	1.63371	5.66578	-1.39786	0.292686
	1.63504	5.6963	-1.37783	0.304606
	1.63637	5.72777	-1.35685	0.315574
	1.63771	5.75972	-1.33444	0.326064
	1.63904	5.79166	-1.31203	0.336555
	1.64037	5.82313	-1.28866	0.347522
	1.64171	5.85413	-1.26577	0.35992
	1.64304	5.88512	-1.24145	0.374225
	1.64437	5.91564	-1.21761	0.38996
	1.64571	5.94711	-1.19425	0.407603
	1.64704	5.97954	-1.17136	0.425246
	1.64837	6.01292	-1.14895	0.442889
	1.64971	6.04725	-1.12558	0.460055
	1.65104	6.08254	-1.10126	0.476268
	1.65237	6.1183	-1.07647	0.49248
	1.65371	6.15549	-1.05072	0.508216
	1.65504	6.19221	-1.02402	0.523952
	1.65637	6.22845	-0.99684	0.540641
	1.65771	6.26469	-0.97013	0.557807
	1.65904	6.3014	-0.94295	0.574973
	1.66037	6.3386	-0.91577	0.593093
	1.66171	6.37627	-0.88812	0.61169
	1.66304	6.41441	-0.86046	0.630763
	1.66437	6.45256	-0.83185	0.65079
	1.66571	6.49118	-0.80324	0.671771
	1.66704	6.53029	-0.77511	0.693229
	1.66837	6.56986	-0.7465	0.71421
	1.66971	6.60849	-0.71836	0.734714
	1.67104	6.64806	-0.6888	0.755694
	1.67237	6.68907	-0.65924	0.777629
	1.67371	6.73151	-0.62967	0.800517
	1.67504	6.77443	-0.59916	0.823882
	1.67637	6.81829	-0.56768	0.847724
	1.67771	6.86264	-0.53478	0.87252
	1.67904	6.90746	-0.50236	0.897792
	1.68037	6.95276	-0.46898	0.923064
	1.68171	6.99758	-0.43417	0.948813
	1.68304	7.04336	-0.39888	0.975516
	1.68437	7.08914	-0.3636	1.0027
	1.68571	7.13539	-0.32783	1.03035
	1.68704	7.1826	-0.29112	1.05849
	1.68837	7.23076	-0.25345	1.08757
	1.68971	7.2794	-0.2153	1.11666
	1.69104	7.32899	-0.17668	1.14575
	1.69237	7.37858	-0.13662	1.17674
	1.69371	7.42817	-0.09514	1.20821
	1.69504	7.47776	-0.05365	1.24111
	1.69637	7.52688	-0.01217	1.27449
	1.69771	7.57599	0.03027	1.30978
	1.69904	7.62653	0.072708	1.34459
	1.70037	7.67851	0.116101	1.3794
	1.70171	7.73334	0.159493	1.41325
	1.70304	7.78913	0.203362	1.44758
	1.70437	7.84588	0.247708	1.48144
	1.70571	7.9031	0.293484	1.5153
	1.70704	7.96127	0.340691	1.55106
	1.70837	8.01945	0.389328	1.58968
	1.70971	8.07762	0.438919	1.62926
	1.71104	8.13627	0.490418	1.67027
	1.71237	8.19588	0.542393	1.71175
	1.71371	8.25596	0.594845	1.75371
	1.71504	8.31699	0.646344	1.79568
	1.71637	8.37851	0.697365	1.83764
	1.71771	8.4405	0.74934	1.88103
	1.71904	8.50391	0.802746	1.9249
	1.72037	8.56781	0.858059	1.9702
	1.72171	8.63361	0.91528	2.01693
	1.72304	8.70085	0.973454	2.06604
	1.72437	8.76951	1.03354	2.11611
	1.72571	8.84008	1.09362	2.16713
	1.72704	8.91161	1.15417	2.21911
	1.72837	8.98457	1.21569	2.27204
	1.72971	9.058	1.27768	2.32592
	1.73104	9.13143	1.34157	2.38123
	1.73237	9.20486	1.40785	2.43893
	1.73371	9.27925	1.47556	2.49853
	1.73504	9.35459	1.54518	2.55814
	1.73637	9.43184	1.61623	2.6187
	1.73771	9.51242	1.68871	2.68069
	1.73904	9.59492	1.76262	2.74268
	1.74037	9.67884	1.83748	2.80609
	1.74171	9.76324	1.91378	2.87094
	1.74304	9.84907	1.9915	2.93818
	1.74437	9.93538	2.07018	3.00827
	1.74571	10.0222	2.15029	3.08028
	1.74704	10.1099	2.23183	3.15514
	1.74837	10.2005	2.31575	3.23143
	1.74971	10.2935	2.40158	3.30963
	1.75104	10.3884	2.48932	3.38927
	1.75237	10.4842	2.57944	3.47033
	1.75371	10.582	2.67147	3.55187
	1.75504	10.6816	2.76588	3.63436
	1.75637	10.7822	2.86221	3.71876
	1.75771	10.8833	2.96043	3.80459
	1.75904	10.9868	3.06009	3.89185
	1.76037	11.0931	3.16071	3.98054
	1.76171	11.2019	3.26227	4.07114
	1.76304	11.313	3.36527	4.16508
	1.76437	11.4269	3.47065	4.2614
	1.76571	11.5437	3.57889	4.36011
	1.76704	11.663	3.68904	4.46215
	1.76837	11.7831	3.80253	4.56705
	1.76971	11.9047	3.9184	4.67482
	1.77104	12.0287	4.03618	4.78354
	1.77237	12.1555	4.15539	4.89416
	1.77371	12.2843	4.27698	5.00622
	1.77504	12.4145	4.40191	5.12066
	1.77637	12.5461	4.53018	5.23796
	1.77771	12.6796	4.66084	5.35813
	1.77904	12.815	4.79387	5.48067
	1.78037	12.9533	4.92977	5.60608
	1.78171	13.0939	5.06806	5.73292
	1.78304	13.2375	5.20729	5.86119
	1.78437	13.3839	5.34891	5.99232
	1.78571	13.5341	5.49292	6.12488
	1.78704	13.6871	5.64121	6.2603
	1.78837	13.8416	5.79285	6.39811
	1.78971	13.998	5.9483	6.54021
	1.79104	14.1578	6.10661	6.68564
	1.79237	14.3204	6.2673	6.83346
	1.79371	14.4858	6.4299	6.98367
	1.79504	14.6537	6.59441	7.13721
	1.79637	14.8253	6.76178	7.29361
	1.79771	14.9994	6.93153	7.45287
	1.79904	15.1758	7.1051	7.61452
	1.80037	15.3542	7.28201	7.77903
	1.80171	15.5349	7.46321	7.94688
	1.80304	15.718	7.64631	8.11663
	1.80437	15.904	7.83133	8.28877
	1.80571	16.0933	8.01634	8.46186
	1.80704	16.2859	8.20326	8.63781
	1.80837	16.4824	8.39209	8.81567
	1.80971	16.6817	8.58377	8.99544
	1.81104	16.8824	8.77832	9.17807
	1.81237	17.0851	8.97764	9.36451
	1.81371	17.2901	9.18173	9.55429
	1.81504	17.4985	9.38963	9.74694
	1.81637	17.7102	9.60039	9.94244
	1.81771	17.9257	9.81354	10.1408
	1.81904	18.1437	10.0296	10.3415
	1.82037	18.3644	10.2484	10.5442
	1.82171	18.5871	10.4692	10.7488
	1.82304	18.8098	10.6919	10.9557
	1.82437	19.0334	10.9165	11.1655
	1.82571	19.2585	11.1439	11.3768
	1.82704	19.4874	11.3733	11.5885
	1.82837	19.7196	11.6036	11.8011
	1.82971	19.9556	11.8348	12.0162
	1.83104	20.1945	12.0685	12.2327
	1.83237	20.4372	12.305	12.4516
	1.83371	20.6814	12.5434	12.6728
	1.83504	20.9265	12.7847	12.8974
	1.83637	21.1735	13.0289	13.1253
	1.83771	21.4233	13.2763	13.3561
	1.83904	21.6765	13.5262	13.5893
	1.84037	21.9326	13.7784	13.8244
	1.84171	22.1911	14.0321	14.0618
	1.84304	22.4509	14.2863	14.3007
	1.84437	22.7108	14.5419	14.5406
	1.84571	22.9702	14.7998	14.7823
	1.84704	23.2291	15.0592	15.0241
	1.84837	23.489	15.3196	15.2663
	1.84971	23.7508	15.5804	15.5086
	1.85104	24.0164	15.8417	15.7522
	1.85237	24.2844	16.1049	15.9968
	1.85371	24.5547	16.3691	16.2438
	1.85504	24.826	16.6342	16.4928
	1.85637	25.0983	16.9017	16.745
	1.85771	25.3715	17.1716	16.9996
	1.85904	25.6453	17.4444	17.2566
	1.86037	25.9204	17.7185	17.5151
	1.86171	26.197	17.9946	17.7745
	1.86304	26.4749	18.2717	18.0353
	1.86437	26.7539	18.5501	18.2966
	1.86571	27.0343	18.8296	18.5603
	1.86704	27.3156	19.1114	18.8273
	1.86837	27.5974	19.3951	19.0972
	1.86971	27.8788	19.6812	19.3686
	1.87104	28.1615	19.9683	19.6408
	1.87237	28.4467	20.2568	19.9141
	1.87371	28.7342	20.5462	20.1887
	1.87504	29.0241	20.8361	20.4639
	1.87637	29.3145	21.127	20.7399
	1.87771	29.6063	21.4198	21.0179
	1.87904	29.8982	21.7154	21.3007
	1.88037	30.1909	22.0153	21.5882
	1.88171	30.4833	22.3181	21.8801
	1.88304	30.7775	22.6238	22.1762
	1.88437	31.0736	22.9332	22.4756
	1.88571	31.373	23.2451	22.7794
	1.88704	31.6744	23.5607	23.0869
	1.88837	31.9767	23.8802	23.3973
	1.88971	32.2795	24.2054	23.7116
	1.89104	32.5828	24.5368	24.0315
	1.89237	32.887	24.8749	24.3582
	1.89371	33.1931	25.2197	24.692
	1.89504	33.5035	25.5711	25.0324
	1.89637	33.8187	25.9292	25.3796
	1.89771	34.1396	26.293	25.7343
	1.89904	34.4658	26.664	26.0982
	1.90037	34.7962	27.0436	26.472
	1.90171	35.1315	27.4336	26.8578
	1.90304	35.471	27.8356	27.2564
	1.90437	35.8143	28.2519	27.6693
	1.90571	36.1619	28.6829	28.0971
	1.90704	36.5176	29.1297	28.5396
	1.90837	36.8829	29.5923	28.9973
	1.90971	37.2577	30.0705	29.4723
	1.91104	37.641	30.566	29.9663
	1.91237	38.0335	31.0795	30.4808
	1.91371	38.4364	31.6141	31.0172
	1.91504	38.8503	32.171	31.577
	1.91637	39.2766	32.7523	32.1616
	1.91771	39.7172	33.3602	32.7715
	1.91904	40.175	33.9954	33.4081
	1.92037	40.6527	34.6587	34.0733
	1.92171	41.1515	35.3525	34.7704
	1.92304	41.6718	36.0787	35.5033
	1.92437	42.2125	36.8411	36.2743
	1.92571	42.7756	37.6427	37.0878
	1.92704	43.3631	38.4867	37.9466
	1.92837	43.9782	39.3765	38.8521
	1.92971	44.6224	40.3149	39.8063
	1.93104	45.2986	41.3034	40.8115
	1.93237	46.0081	42.3443	41.8695
	1.93371	46.7539	43.4415	42.9844
	1.93504	47.5373	44.5988	44.1588
	1.93637	48.3608	45.82	45.3977
	1.93771	49.2268	47.1089	46.7047
	1.93904	50.139	48.4707	48.0832
	1.94037	51.1026	49.907	49.5361
	1.94171	52.1207	51.4209	51.0668
	1.94304	53.1969	53.0159	52.6785
	1.94437	54.3356	54.6987	54.3779
	1.94571	55.5391	56.474	56.1704
	1.94704	56.8099	58.347	58.062
	1.94837	58.1508	60.3249	60.058
	1.94971	59.5655	62.4144	62.1652
	1.95104	61.059	64.6217	64.3868
	1.95237	62.6359	66.9496	66.7261
	1.95371	64.3024	69.4025	69.1856
	1.95504	66.0629	71.9855	71.7701
	1.95637	67.9216	74.7039	74.4847
	1.95771	69.8829	77.563	77.3372
	1.95904	71.95	80.569	80.3341
	1.96037	74.1277	83.7285	83.4812
	1.96171	76.4213	87.0469	86.7833
	1.96304	78.8374	90.5263	90.2428
	1.96437	81.3837	94.1703	93.8615
	1.96571	84.0683	97.9831	97.6433
	1.96704	86.8959	101.97	101.593
	1.96837	89.8705	106.138	105.719
	1.96971	92.9956	110.492	110.03
	1.97104	96.2758	115.041	114.537
	1.97237	99.7152	119.793	119.246
	1.97371	103.319	124.753	124.16
	1.97504	107.093	129.923	129.276
	1.97637	111.043	135.303	134.595
	1.97771	115.175	140.899	140.12
	1.97904	119.494	146.714	145.852
	1.98037	124.001	152.753	151.798
	1.98171	128.699	159.02	157.963
	1.98304	133.595	165.518	164.351
	1.98437	138.693	172.248	170.964
	1.98571	144.003	179.212	177.799
	1.98704	149.537	186.412	184.859
	1.98837	155.303	193.849	192.142
	1.98971	161.3	201.521	199.644
	1.99104	167.52	209.426	207.363
	1.99237	173.955	217.565	215.298
	1.99371	180.602	225.94	223.452
	1.99504	187.456	234.554	231.825
	1.99637	194.52	243.403	240.416
	1.99771	201.801	252.486	249.222
	1.99904	209.309	261.798	258.243
	2.00037	217.047	271.333	267.476
	2.00171	225.012	281.081	276.915
	2.00304	233.193	291.034	286.553
	2.00437	241.577	301.179	296.386
	2.00571	250.158	311.511	306.409
	2.00704	258.937	322.023	316.611
	2.00837	267.916	332.701	326.973
	2.00971	277.097	343.53	337.474
	2.01104	286.48	354.496	348.1
	2.01237	296.06	365.594	358.843
	2.01371	305.826	376.822	369.701
	2.01504	315.762	388.18	380.673
	2.01637	325.851	399.664	391.763
	2.01771	336.086	411.267	402.964
	2.01904	346.461	422.976	414.259
	2.02037	356.97	434.765	425.625
	2.02171	367.608	446.604	437.036
	2.02304	378.365	458.47	448.474
	2.02437	389.222	470.348	459.923
	2.02571	400.152	482.227	471.376
	2.02704	411.133	494.098	482.824
	2.02837	422.153	505.948	494.249
	2.02971	433.207	517.758	505.628
	2.03104	444.295	529.501	516.925
	2.03237	455.414	541.138	528.109
	2.03371	466.562	552.643	539.16
	2.03504	477.726	564.002	550.072
	2.03637	488.877	575.21	560.85
	2.03771	499.98	586.265	571.499
	2.03904	511.006	597.163	582.023
	2.04037	521.936	607.898	592.412
	2.04171	532.76	618.449	602.64
	2.04304	543.47	628.782	612.669
	2.04437	554.057	638.862	622.468
	2.04571	564.507	648.665	632.016
	2.04704	574.795	658.179	641.3
	2.04837	584.884	667.399	650.32
	2.04971	594.741	676.326	659.074
	2.05104	604.346	684.963	667.559
	2.05237	613.701	693.301	675.754
	2.05371	622.811	701.319	683.629
	2.05504	631.689	708.988	691.154
	2.05637	640.341	716.291	698.32
	2.05771	648.765	723.221	705.131
	2.05904	656.935	729.779	711.596
	2.06037	664.816	735.977	717.729
	2.06171	672.381	741.825	723.54
	2.06304	679.611	747.328	729.037
	2.06437	686.501	752.478	734.198
	2.06571	693.059	757.254	738.994
	2.06704	699.293	761.634	743.4
	2.06837	705.2	765.601	747.41
	2.06971	710.763	769.15	751.031
	2.07104	715.956	772.291	754.274
	2.07237	720.757	775.036	757.155
	2.07371	725.157	777.399	759.685
	2.07504	729.159	779.384	761.862
	2.07637	732.785	780.982	763.669
	2.07771	736.058	782.179	765.09
	2.07904	738.998	782.969	766.116
	2.08037	741.608	783.361	766.76
	2.08171	743.875	783.365	767.038
	2.08304	745.773	782.998	766.98
	2.08437	747.285	782.284	766.605
	2.08571	748.408	781.252	765.926
	2.08704	749.151	779.908	764.944
	2.08837	749.534	778.245	763.643
	2.08971	749.574	776.25	762.011
	2.09104	749.291	773.918	760.05
	2.09237	748.684	771.253	757.776
	2.09371	747.741	768.266	755.206
	2.09504	746.443	764.979	752.363
	2.09637	744.788	761.414	749.26
	2.09771	742.791	757.588	745.903
	2.09904	740.476	753.508	742.282
	2.10037	737.87	749.174	738.388
	2.10171	735.001	744.582	734.226
	2.10304	731.885	739.736	729.805
	2.10437	728.524	734.651	725.148
	2.10571	724.904	729.345	720.286
	2.10704	721.016	723.836	715.246
	2.10837	716.856	718.146	710.041
	2.10971	712.436	712.285	704.672
	2.11104	707.777	706.252	699.136
	2.11237	702.904	700.046	693.435
	2.11371	697.841	693.672	687.565
	2.11504	692.6	687.144	681.536
	2.11637	687.182	680.476	675.369
	2.11771	681.581	673.687	669.083
	2.11904	675.798	666.797	662.696
	2.12037	669.844	659.822	656.213
	2.12171	663.735	652.77	649.629
	2.12304	657.5	645.639	642.937
	2.12437	651.162	638.435	636.137
	2.12571	644.742	631.158	629.24
	2.12704	638.241	623.812	622.258
	2.12837	631.653	616.41	615.212
	2.12971	624.972	608.96	608.12
	2.13104	618.193	601.48	601.001
	2.13237	611.322	593.976	593.864
	2.13371	604.372	586.456	586.71
	2.13504	597.367	578.926	579.534
	2.13637	590.326	571.39	572.339
	2.13771	583.262	563.854	565.13
	2.13904	576.176	556.318	557.912
	2.14037	569.06	548.787	550.685
	2.14171	561.912	541.269	543.456
	2.14304	554.731	533.772	536.23
	2.14437	547.527	526.302	529.014
	2.14571	540.311	518.867	521.81
	2.14704	533.102	511.473	514.629
	2.14837	525.914	504.122	507.481
	2.14971	518.758	496.814	500.374
	2.15104	511.639	489.549	493.312
	2.15237	504.552	482.328	486.296
	2.15371	497.494	475.152	479.327
	2.15504	490.465	468.025	472.406
	2.15637	483.474	460.955	465.536
	2.15771	476.527	453.949	458.715
	2.15904	469.632	447.009	451.944
	2.16037	462.796	440.133	445.225
	2.16171	456.023	433.324	438.559
	2.16304	449.314	426.575	431.948
	2.16437	442.665	419.886	425.389
	2.16571	436.071	413.258	418.885
	2.16704	429.532	406.697	412.437
	2.16837	423.046	400.208	406.05
	2.16971	416.614	393.798	399.727
	2.17104	410.238	387.468	393.47
	2.17237	403.924	381.213	387.281
	2.17371	397.678	375.029	381.162
	2.17504	391.504	368.909	375.109
	2.17637	385.4	362.849	369.123
	2.17771	379.366	356.849	363.203
	2.17904	373.403	350.92	357.354
	2.18037	367.51	345.072	351.578
	2.18171	361.687	339.313	345.876
	2.18304	355.935	333.645	340.249
	2.18437	350.257	328.07	334.697
	2.18571	344.657	322.584	329.217
	2.18704	339.133	317.182	323.808
	2.18837	333.684	311.862	318.469
	2.18971	328.306	306.627	313.204
	2.19104	322.995	301.482	308.022
	2.19237	317.745	296.424	302.925
	2.19371	312.555	291.451	297.914
	2.19504	307.426	286.555	292.987
	2.19637	302.366	281.724	288.138
	2.19771	297.379	276.949	283.359
	2.19904	292.468	272.223	278.644
	2.20037	287.633	267.549	273.99
	2.20171	282.872	262.933	269.397
	2.20304	278.18	258.387	264.869
	2.20437	273.551	253.918	260.408
	2.20571	268.983	249.528	256.013
	2.20704	264.479	245.213	251.682
	2.20837	260.042	240.969	247.41
	2.20971	255.677	236.787	243.195
	2.21104	251.381	232.66	239.036
	2.21237	247.153	228.586	234.935
	2.21371	242.986	224.571	230.897
	2.21504	238.875	220.619	226.928
	2.21637	234.813	216.732	223.026
	2.21771	230.799	212.907	219.19
	2.21904	226.838	209.142	215.412
	2.22037	222.933	205.43	211.686
	2.22171	219.089	201.765	208.003
	2.22304	215.303	198.147	204.364
	2.22437	211.574	194.577	200.771
	2.22571	207.901	191.062	197.233
	2.22704	204.282	187.606	193.754
	2.22837	200.714	184.212	190.337
	2.22971	197.201	180.879	186.981
	2.23104	193.75	177.604	183.681
	2.23237	190.363	174.381	180.435
	2.23371	187.035	171.207	177.238
	2.23504	183.763	168.078	174.092
	2.23637	180.539	164.998	171.001
	2.23771	177.358	161.97	167.969
	2.23904	174.213	158.995	164.993
	2.24037	171.103	156.071	162.071
	2.24171	168.034	153.195	159.196
	2.24304	165.012	150.36	156.362
	2.24437	162.041	147.561	153.562
	2.24571	159.121	144.797	150.796
	2.24704	156.251	142.069	148.065
	2.24837	153.427	139.382	145.374
	2.24971	150.645	136.74	142.724
	2.25104	147.904	134.147	140.118
	2.25237	145.205	131.603	137.552
	2.25371	142.554	129.106	135.024
	2.25504	139.956	126.655	132.53
	2.25637	137.41	124.245	130.072
	2.25771	134.911	121.878	127.652
	2.25904	132.457	119.556	125.275
	2.26037	130.04	117.281	122.945
	2.26171	127.654	115.052	120.665
	2.26304	125.299	112.867	118.431
	2.26437	122.976	110.724	116.238
	2.26571	120.695	108.619	114.081
	2.26704	118.456	106.547	111.955
	2.26837	116.262	104.504	109.856
	2.26971	114.109	102.492	107.787
	2.27104	111.994	100.512	105.755
	2.27237	109.915	98.5658	103.762
	2.27371	107.869	96.6546	101.809
	2.27504	105.857	94.7802	99.8968
	2.27637	103.883	92.9401	98.0224
	2.27771	101.952	91.1329	96.1818
	2.27904	100.062	89.3567	94.3722
	2.28037	98.2084	87.6114	92.5926
	2.28171	96.3869	85.8986	90.846
	2.28304	94.5921	84.2211	89.1355
	2.28437	92.8192	82.5798	87.4614
	2.28571	91.0649	80.9729	85.8191
	2.28704	89.3292	79.396	84.2065
	2.28837	87.6188	77.8448	82.621
	2.28971	85.9408	76.3195	81.0613
	2.29104	84.2996	74.8179	79.5249
	2.29237	82.696	73.3402	78.0143
	2.29371	81.13	71.8896	76.5337
	2.29504	79.5999	70.4696	75.086
	2.29637	78.1016	69.082	73.6708
	2.29771	76.6316	67.724	72.2841
	2.29904	75.1882	66.3927	70.9228
	2.30037	73.7743	65.0866	69.5847
	2.30171	72.3901	63.8053	68.2677
	2.30304	71.0359	62.5493	66.9731
	2.30437	69.7093	61.3201	65.7014
	2.30571	68.4075	60.118	64.4549
	2.30704	67.1277	58.9445	63.2352
	2.30837	65.8688	57.7972	62.0407
	2.30971	64.631	56.6757	60.8701
	2.31104	63.4151	55.5761	59.7199
	2.31237	62.2244	54.4956	58.5898
	2.31371	61.06	53.4317	57.4779
	2.31504	59.9213	52.3846	56.3835
	2.31637	58.8064	51.3561	55.3092
	2.31771	57.7135	50.3476	54.2559
	2.31904	56.6416	49.3591	53.2259
	2.32037	55.5916	48.392	52.2179
	2.32171	54.5635	47.4451	51.2313
	2.32304	53.5583	46.5176	50.2647
	2.32437	52.577	45.6083	49.3168
	2.32571	51.6176	44.7171	48.386
	2.32704	50.6792	43.8425	47.4733
	2.32837	49.7594	42.9871	46.5802
	2.32971	48.8548	42.1517	45.7076
	2.33104	47.965	41.3372	44.856
	2.33237	47.09	40.5409	44.0234
	2.33371	46.2317	39.7623	43.209
	2.33504	45.3911	38.9993	42.4098
	2.33637	44.569	38.2516	41.624
	2.33771	43.7636	37.5178	40.851
	2.33904	42.974	36.7978	40.0914
	2.34037	42.1996	36.092	39.3461
	2.34171	41.4395	35.4006	38.6166
	2.34304	40.6952	34.724	37.9023
	2.34437	39.9675	34.0626	37.2037
	2.34571	39.2575	33.4156	36.5194
	2.34704	38.5666	32.7818	35.8485
	2.34837	37.8938	32.1615	35.1905
	2.34971	37.2362	31.5554	34.5463
	2.35104	36.5925	30.9627	33.9149
	2.35237	35.9612	30.3843	33.297
	2.35371	35.3413	29.8202	32.6919
	2.35504	34.7328	29.2699	32.0996
	2.35637	34.1363	28.7325	31.5207
	2.35771	33.5522	28.207	30.9543
	2.35904	32.9828	27.6926	30.3987
	2.36037	32.4273	27.1881	29.8547
	2.36171	31.8861	26.6936	29.3225
	2.36304	31.3573	26.2101	28.8037
	2.36437	30.8404	25.737	28.2969
	2.36571	30.3354	25.274	27.8019
	2.36704	29.8414	24.821	27.3184
	2.36837	29.3584	24.3785	26.8463
	2.36971	28.8873	23.9451	26.3847
	2.37104	28.4276	23.5207	25.9317
	2.37237	27.9794	23.1054	25.4869
	2.37371	27.5412	22.6991	25.0506
	2.37504	27.1125	22.3019	24.6224
	2.37637	26.6924	21.9138	24.2032
	2.37771	26.2809	21.5332	23.7936
	2.37904	25.8779	21.1604	23.3926
	2.38037	25.4831	20.7941	23.0002
	2.38171	25.0974	20.4365	22.6158
	2.38304	24.7202	20.087	22.2405
	2.38437	24.3521	19.7442	21.8734
	2.38571	23.9925	19.408	21.5139
	2.38704	23.6402	19.079	21.1619
	2.38837	23.2959	18.7581	20.8191
	2.38971	22.9597	18.4433	20.4834
	2.39104	22.6312	18.1348	20.1553
	2.39237	22.3093	17.8325	19.833
	2.39371	21.9946	17.5364	19.5169
	2.39504	21.6875	17.246	19.2069
	2.39637	21.388	16.9613	18.9032
	2.39771	21.0943	16.6824	18.6056
	2.39904	20.8058	16.4096	18.3143
	2.40037	20.5231	16.1426	18.0296
	2.40171	20.2456	15.8813	17.7497
	2.40304	19.9728	15.6248	17.4765
	2.40437	19.7058	15.3725	17.2085
	2.40571	19.444	15.1241	16.9462
	2.40704	19.1889	14.8795	16.6878
	2.40837	18.94	14.6396	16.4341
	2.40971	18.6958	14.4045	16.1861
	2.41104	18.4569	14.1737	15.943
	2.41237	18.2219	13.9468	15.705
	2.41371	17.9915	13.7241	15.4714
	2.41504	17.766	13.5052	15.243
	2.41637	17.5448	13.2902	15.0193
	2.41771	17.3278	13.0789	14.8
	2.41904	17.1166	12.872	14.5845
	2.42037	16.9106	12.6698	14.3723
	2.42171	16.7093	12.4729	14.1644
	2.42304	16.5114	12.2802	13.9608
	2.42437	16.3174	12.0909	13.7609
	2.42571	16.1262	11.9045	13.5645
	2.42704	15.9392	11.7209	13.3714
	2.42837	15.7566	11.5411	13.1811
	2.42971	15.5773	11.3642	12.9947
	2.43104	15.4018	11.1916	12.8106
	2.43237	15.2302	11.0237	12.6294
	2.43371	15.0633	10.8602	12.4525
	2.43504	14.8997	10.7009	12.2804
	2.43637	14.739	10.5464	12.113
	2.43771	14.5817	10.3958	11.9499
	2.43904	14.4277	10.2484	11.7902
	2.44037	14.2779	10.1035	11.6352
	2.44171	14.132	9.96183	11.4836
	2.44304	13.989	9.82403	11.3348
	2.44437	13.8483	9.68861	11.1894
	2.44571	13.71	9.55509	11.0473
	2.44704	13.5737	9.42444	10.9085
	2.44837	13.4397	9.2976	10.7721
	2.44971	13.3066	9.1741	10.6377
	2.45104	13.176	9.05346	10.5056
	2.45237	13.0477	8.93616	10.3768
	2.45371	12.9232	8.82267	10.2505
	2.45504	12.8017	8.71204	10.1274
	2.45637	12.6824	8.60476	10.0073
	2.45771	12.5666	8.4989	9.89094
	2.45904	12.4536	8.3959	9.77745
	2.46037	12.3424	8.29624	9.66587
	2.46171	12.2333	8.19849	9.5562
	2.46304	12.126	8.1036	9.44939
	2.46437	12.0206	8.01157	9.34544
	2.46571	11.9176	7.92288	9.24435
	2.46704	11.8165	7.83753	9.14564
	2.46837	11.7173	7.75455	9.04932
	2.46971	11.62	7.67492	8.95586
	2.47104	11.5252	7.59958	8.86431
	2.47237	11.4322	7.5271	8.77514
	2.47371	11.3421	7.45796	8.6874
	2.47504	11.2538	7.39121	8.6011
	2.47637	11.1675	7.32779	8.5167
	2.47771	11.0831	7.26627	8.43373
	2.47904	11.0006	7.20762	8.35314
	2.48037	10.9191	7.15088	8.27542
	2.48171	10.8395	7.09652	8.20151
	2.48304	10.7613	7.04359	8.12903
	2.48437	10.6854	6.99305	8.05846
	2.48571	10.6111	6.94441	7.98884
	2.48704	10.5381	6.89768	7.9197
	2.48837	10.4661	6.85286	7.85055
	2.48971	10.395	6.81042	7.78237
	2.49104	10.3245	6.77084	7.71609
	2.49237	10.2549	6.73317	7.65219
	2.49371	10.1872	6.69788	7.59115
	2.49504	10.1209	6.66451	7.53155
	2.49637	10.056	6.63303	7.4729
	2.49771	9.99212	6.60204	7.41472
	2.49904	9.93013	6.572	7.35607
	2.50037	9.86958	6.54291	7.29647
	2.50171	9.80902	6.51478	7.23591
	2.50304	9.74894	6.48903	7.17488
	2.50437	9.68933	6.46471	7.11384
	2.50571	9.6302	6.4423	7.05185
	2.50704	9.57012	6.41989	6.98891
	2.50837	9.50909	6.39748	6.92454
	2.50971	9.44614	6.37459	6.85826
	2.51104	9.38273	6.35075	6.78959
	2.51237	9.31835	6.325	6.71759
	2.51371	9.25207	6.29782	6.6413
	2.51504	9.18436	6.26921	6.56071
	2.51637	9.11426	6.23917	6.47488
	2.51771	9.04226	6.20722	6.38333
	2.51904	8.96883	6.17289	6.28557
	2.52037	8.89254	6.13474	6.18115
	2.52171	8.8129	6.09278	6.07005
	2.52304	8.72946	6.04652	5.95131
	2.52437	8.64315	5.99693	5.824
	2.52571	8.5516	5.94257	5.68714
	2.52704	8.4548	5.88297	5.54028
	2.52837	8.35133	5.8186	5.38244
	2.52971	8.24261	5.74898	5.21364
	2.53104	8.12912	5.67316	5.0334
	2.53237	8.00943	5.59019	4.84028
	2.53371	7.8826	5.49959	4.63476
	2.53504	7.74956	5.40184	4.41685
	2.53637	7.60984	5.29646	4.18558
	2.53771	7.4625	5.18297	3.94049
	2.53904	7.30753	5.0609	3.68109
	2.54037	7.14636	4.93025	3.40596
	2.54171	6.97899	4.79149	3.11652
	2.54304	6.80494	4.64462	2.81229
	2.54437	6.62375	4.48965	2.49329
	2.54571	6.43539	4.32705	2.15998
	2.54704	6.23989	4.15682	1.81141
	2.54837	6.03676	3.98134	1.44854
	2.54971	5.82647	3.79919	1.07184
	2.55104	5.60951	3.61036	0.680831
	2.55237	5.38731	3.41486	0.277427
	2.55371	5.15938	3.21364	-0.13885
	2.55504	4.92525	3.00669	-0.56658
	2.55637	4.68588	2.79402	-1.00527
	2.55771	4.44126	2.57515	-1.45588
	2.55904	4.19378	2.35199	-1.91745
	2.56037	3.94201	2.12454	-2.38809
	2.56171	3.68738	1.89327	-2.86636
	2.56304	3.43084	1.65915	-3.35035
	2.56437	3.1724	1.42311	-3.83911
	2.56571	2.913	1.18565	-4.33025
	2.56704	2.65217	0.947705	-4.82521
	2.56837	2.39181	0.709286	-5.32303
	2.56971	2.13242	0.470391	-5.82418
	2.57104	1.87492	0.231972	-6.32772
	2.57237	1.61934	-0.00549	-6.83317
	2.57371	1.36614	-0.24153	-7.33814
	2.57504	1.11723	-0.47518	-7.84168
	2.57637	0.872135	-0.70501	-8.34236
	2.57771	0.630856	-0.93056	-8.8397
	2.57904	0.392914	-1.15181	-9.33227
	2.58037	0.160217	-1.36877	-9.82055
	2.58171	-0.06676	-1.58192	-10.3031
	2.58304	-0.28849	-1.79125	-10.7795
	2.58437	-0.50449	-1.99581	-11.2492
	2.58571	-0.71383	-2.19513	-11.7098
	2.58704	-0.91648	-2.38825	-12.1604
	2.58837	-1.11151	-2.57421	-12.601
	2.58971	-1.2989	-2.75255	-13.0311
	2.59104	-1.47867	-2.92374	-13.4493
	2.59237	-1.65033	-3.08681	-13.8555
	2.59371	-1.81293	-3.24274	-14.2499
	2.59504	-1.96552	-3.39056	-14.6318
	2.59637	-2.10905	-3.53027	-14.9995
	2.59771	-2.24447	-3.66188	-15.3519
	2.59904	-2.37226	-3.78538	-15.6885
	2.60037	-2.491	-3.90125	-16.0099
	2.60171	-2.60258	-4.00902	-16.3156
	2.60304	-2.70605	-4.11058	-16.6055
	2.60437	-2.8019	-4.20547	-16.8797
	2.60571	-2.88916	-4.29417	-17.1391
	2.60704	-2.96831	-4.37618	-17.3832
	2.60837	-3.03888	-4.45105	-17.6111
	2.60971	-3.10183	-4.51923	-17.8224
	2.61104	-3.15619	-4.58075	-18.0174
	2.61237	-3.20339	-4.63558	-18.1957
	2.61371	-3.24345	-4.68327	-18.3588
	2.61504	-3.27492	-4.7238	-18.5057
	2.61637	-3.29924	-4.75861	-18.6373
	2.61771	-3.31688	-4.78769	-18.7527
	2.61904	-3.32785	-4.8101	-18.8518
	2.62037	-3.33166	-4.82679	-18.9353
	2.62171	-3.3288	-4.83776	-19.0035
	2.62304	-3.31926	-4.84444	-19.0564
	2.62437	-3.30353	-4.84539	-19.0931
	2.62571	-3.28159	-4.8411	-19.1151
	2.62704	-3.25394	-4.83204	-19.1236
	2.62837	-3.22056	-4.81869	-19.1179
	2.62971	-3.18146	-4.80152	-19.0989
	2.63104	-3.13711	-4.78006	-19.0664
	2.63237	-3.08704	-4.75574	-19.0221
	2.63371	-3.03173	-4.72904	-18.9653
	2.63504	-2.97165	-4.69948	-18.8962
	2.63637	-2.90775	-4.6661	-18.8151
	2.63771	-2.84004	-4.62986	-18.7236
	2.63904	-2.76756	-4.59076	-18.622
	2.64037	-2.69032	-4.54784	-18.5109
	2.64171	-2.60925	-4.50111	-18.3898
	2.64304	-2.52438	-4.452	-18.2591
	2.64437	-2.43616	-4.40145	-18.119
	2.64571	-2.34461	-4.34853	-17.9697
	2.64704	-2.24972	-4.29417	-17.8128
	2.64837	-2.15244	-4.23838	-17.6483
	2.64971	-2.05231	-4.18068	-17.4771
	2.65104	-1.94931	-4.1206	-17.2988
	2.65237	-1.8425	-4.05718	-17.1143
	2.65371	-1.73283	-3.99185	-16.9226
	2.65504	-1.62077	-3.92509	-16.7237
	2.65637	-1.50728	-3.85786	-16.5192
	2.65771	-1.39141	-3.79063	-16.3084
	2.65904	-1.27363	-3.72339	-16.0929
	2.66037	-1.1549	-3.65568	-15.8726
	2.66171	-1.03569	-3.58654	-15.6485
	2.66304	-0.916	-3.51597	-15.4205
[truncated: 2,503 more rows]

## Sheet: Figure 1_suppl3_Sy12
		Absorption, 230nm
	volume (ml)	FPN alone	with Sy12, w/o vamifeport	with Sy12, with vamifeport
	0.000373333	0.312328	0.041008	-0.34666
	0.00170667	0.321865	0.046253	-0.33903
	0.00304	0.331879	0.051498	-0.33236
	0.00437333	0.341892	0.055313	-0.32902
	0.00570667	0.348568	0.05722	-0.32902
	0.00704	0.351906	0.05722	-0.33188
	0.00837333	0.352383	0.05579	-0.33665
	0.00970667	0.351906	0.053406	-0.34189
	0.01104	0.350952	0.051022	-0.34714
	0.0123733	0.349522	0.048637	-0.35048
	0.0137067	0.349045	0.046253	-0.35286
	0.01504	0.349522	0.0453	-0.35572
	0.0163733	0.351429	0.0453	-0.35954
	0.0177067	0.352859	0.0453	-0.36287
	0.01904	0.35429	0.046253	-0.36669
	0.0203733	0.354767	0.047207	-0.37003
	0.0217067	0.354767	0.048161	-0.37384
	0.02304	0.355244	0.048161	-0.3767
	0.0243733	0.355721	0.047684	-0.37909
	0.0257067	0.356197	0.04673	-0.38052
	0.02704	0.357628	0.045776	-0.38242
	0.0283733	0.360012	0.044346	-0.38528
	0.0297067	0.362396	0.043392	-0.3891
	0.03104	0.364304	0.042915	-0.39339
	0.0323733	0.366688	0.042915	-0.39673
	0.0337067	0.369072	0.042439	-0.40054
	0.03504	0.371456	0.041962	-0.40436
	0.0363733	0.372887	0.041485	-0.4077
	0.0377067	0.373363	0.041008	-0.4096
	0.03904	0.37384	0.040531	-0.41151
	0.0403733	0.37384	0.040054	-0.41485
	0.0417067	0.37384	0.040054	-0.41819
	0.04304	0.373363	0.040054	-0.42105
	0.0443733	0.374317	0.040054	-0.42343
	0.0457067	0.375271	0.040054	-0.42582
	0.04704	0.376701	0.040054	-0.42915
	0.0483733	0.378132	0.040054	-0.43249
	0.0497067	0.379562	0.040531	-0.43488
	0.05104	0.380993	0.040531	-0.43821
	0.0523733	0.382423	0.040531	-0.44155
	0.0537067	0.383377	0.040531	-0.44537
	0.05504	0.383854	0.041008	-0.44918
	0.0563733	0.385284	0.041485	-0.45204
	0.0577067	0.386715	0.042915	-0.45586
	0.05904	0.388145	0.043869	-0.45919
	0.0603733	0.389576	0.044346	-0.46206
	0.0617067	0.391483	0.044346	-0.46492
	0.06304	0.393391	0.043392	-0.4673
	0.0643733	0.395298	0.041962	-0.46921
	0.0657067	0.396729	0.040054	-0.47064
	0.06704	0.398159	0.03767	-0.47207
	0.0683733	0.400066	0.03624	-0.47398
	0.0697067	0.401974	0.035763	-0.47588
	0.07104	0.403881	0.034809	-0.47731
	0.0723733	0.405312	0.032902	-0.4797
	0.0737067	0.407219	0.031471	-0.48208
	0.07504	0.409126	0.030518	-0.48494
	0.0763733	0.411034	0.029564	-0.48637
	0.0777067	0.412464	0.029087	-0.4878
	0.07904	0.413895	0.02861	-0.48923
	0.0803733	0.416279	0.029087	-0.49067
	0.0817067	0.418663	0.029087	-0.4921
	0.08304	0.421047	0.029087	-0.49353
	0.0843733	0.423431	0.029564	-0.49496
	0.0857067	0.425339	0.029087	-0.49734
	0.08704	0.426769	0.029087	-0.49973
	0.0883733	0.427723	0.02861	-0.50163
	0.0897067	0.428677	0.029087	-0.50402
	0.09104	0.42963	0.030041	-0.5064
	0.0923733	0.430584	0.030994	-0.50879
	0.0937067	0.432014	0.031948	-0.51117
	0.09504	0.434399	0.033379	-0.51451
	0.0963733	0.436783	0.034809	-0.51785
	0.0977067	0.439167	0.03624	-0.52166
	0.09904	0.441074	0.03624	-0.52452
	0.100373	0.442505	0.035286	-0.52691
	0.101707	0.444412	0.034809	-0.52881
	0.10304	0.446796	0.034332	-0.5312
	0.104373	0.448704	0.034332	-0.53358
	0.105707	0.450134	0.034332	-0.53644
	0.10704	0.452042	0.034809	-0.5393
	0.108373	0.453949	0.035763	-0.54264
	0.109707	0.455856	0.03624	-0.54693
	0.11104	0.458241	0.03624	-0.55027
	0.112373	0.460625	0.03624	-0.55265
	0.113707	0.462532	0.03624	-0.55456
	0.11504	0.464916	0.03624	-0.55647
	0.116373	0.4673	0.036716	-0.5579
	0.117707	0.469208	0.036716	-0.5579
	0.11904	0.470161	0.037193	-0.5579
	0.120373	0.471592	0.037193	-0.55838
	0.121707	0.473022	0.036716	-0.55981
	0.12304	0.473976	0.03624	-0.56171
	0.124373	0.47493	0.035763	-0.56458
	0.125707	0.47636	0.03624	-0.56791
	0.12704	0.478268	0.037193	-0.57125
	0.128373	0.480652	0.038624	-0.57459
	0.129707	0.483036	0.039577	-0.57697
	0.13104	0.486374	0.040531	-0.57983
	0.132373	0.489235	0.041485	-0.58174
	0.133707	0.491142	0.041962	-0.58317
	0.13504	0.491619	0.041962	-0.58317
	0.136373	0.491142	0.042439	-0.58365
	0.137707	0.491142	0.042915	-0.5846
	0.13904	0.492573	0.044346	-0.58508
	0.140373	0.49448	0.045776	-0.58603
	0.141707	0.496864	0.047684	-0.58794
	0.14304	0.499725	0.049591	-0.59032
	0.144373	0.503063	0.050545	-0.59319
	0.145707	0.505447	0.051498	-0.59605
	0.14704	0.508308	0.051975	-0.59843
	0.148373	0.511169	0.052452	-0.59986
	0.149707	0.51403	0.052929	-0.60177
	0.15104	0.516415	0.053883	-0.60368
	0.152373	0.518799	0.055313	-0.60558
	0.153707	0.52166	0.056267	-0.60749
	0.15504	0.523567	0.056744	-0.61035
	0.156373	0.525475	0.057697	-0.61274
	0.157707	0.526905	0.058651	-0.61464
	0.15904	0.528812	0.059128	-0.6156
	0.160373	0.53072	0.059605	-0.61607
	0.161707	0.532627	0.060081	-0.61655
	0.16304	0.535011	0.061035	-0.61703
	0.164373	0.537395	0.061512	-0.6175
	0.165707	0.53978	0.061035	-0.61846
	0.16704	0.54121	0.060081	-0.62037
	0.168373	0.542641	0.059605	-0.62227
	0.169707	0.543594	0.059128	-0.62466
	0.17104	0.544548	0.059605	-0.62752
	0.172373	0.545502	0.060558	-0.63086
	0.173707	0.546455	0.061989	-0.63467
	0.17504	0.54884	0.063419	-0.63896
	0.176373	0.551224	0.063896	-0.64278
	0.177707	0.554085	0.063896	-0.64564
	0.17904	0.555992	0.063896	-0.64659
	0.180373	0.557899	0.063419	-0.64707
	0.181707	0.55933	0.062943	-0.64754
	0.18304	0.56076	0.063419	-0.64802
	0.184373	0.561714	0.06485	-0.64898
	0.185707	0.563622	0.067711	-0.64993
	0.18704	0.565529	0.070095	-0.65136
	0.188373	0.567913	0.071526	-0.65279
	0.189707	0.56982	0.073433	-0.65422
	0.19104	0.571728	0.07391	-0.65565
	0.192373	0.574112	0.07391	-0.6566
	0.193707	0.576019	0.072956	-0.65804
	0.19504	0.57745	0.072002	-0.65947
	0.196373	0.579357	0.071526	-0.66137
	0.197707	0.581264	0.072002	-0.66328
	0.19904	0.584126	0.073433	-0.66519
	0.200373	0.586987	0.076294	-0.6671
	0.201707	0.589848	0.079632	-0.669
	0.20304	0.591278	0.082493	-0.67043
	0.204373	0.593185	0.084877	-0.67091
	0.205707	0.59557	0.086784	-0.67186
	0.20704	0.597477	0.088692	-0.67282
	0.208373	0.597954	0.090122	-0.67377
	0.209707	0.597477	0.091076	-0.67472
	0.21104	0.597954	0.091553	-0.67568
	0.212373	0.599384	0.09203	-0.67711
	0.213707	0.601768	0.09203	-0.67759
	0.21504	0.60463	0.092506	-0.67806
	0.216373	0.607491	0.092983	-0.67854
	0.217707	0.610828	0.094414	-0.67997
	0.21904	0.613213	0.095367	-0.68235
	0.220373	0.61512	0.097275	-0.68474
	0.221707	0.61512	0.099182	-0.68712
	0.22304	0.615597	0.100613	-0.68951
	0.224373	0.61655	0.101566	-0.68998
	0.225707	0.617981	0.10252	-0.69046
	0.22704	0.619888	0.102997	-0.69094
	0.228373	0.621319	0.10252	-0.69141
	0.229707	0.622272	0.10252	-0.69237
	0.23104	0.623226	0.102997	-0.69427
	0.232373	0.62418	0.103951	-0.69666
	0.233707	0.62561	0.103951	-0.69952
	0.23504	0.627518	0.103951	-0.7019
	0.236373	0.629902	0.103951	-0.70333
	0.237707	0.632286	0.103474	-0.70477
	0.23904	0.635147	0.10252	-0.7062
	0.240373	0.637054	0.101566	-0.70763
	0.241707	0.638962	0.100613	-0.70953
	0.24304	0.641346	0.100613	-0.71096
	0.244373	0.645161	0.101566	-0.71335
	0.245707	0.648975	0.10252	-0.71573
	0.24704	0.652313	0.103474	-0.71859
	0.248373	0.654221	0.103951	-0.72098
	0.249707	0.656605	0.103951	-0.72289
	0.25104	0.658512	0.102997	-0.72479
	0.252373	0.659943	0.102043	-0.72622
	0.253707	0.661373	0.101566	-0.7267
	0.25504	0.662804	0.101089	-0.7267
	0.256373	0.664711	0.101089	-0.7267
	0.257707	0.666142	0.101089	-0.72718
	0.25904	0.668049	0.101089	-0.72813
	0.260373	0.669479	0.100613	-0.72956
	0.261707	0.671387	0.100613	-0.73195
	0.26304	0.673771	0.100613	-0.73385
	0.264373	0.676632	0.100613	-0.73671
	0.265707	0.67997	0.100613	-0.73862
	0.26704	0.683308	0.100613	-0.741
	0.268373	0.685692	0.101089	-0.74291
	0.269707	0.687599	0.100613	-0.7453
	0.27104	0.68903	0.100136	-0.74673
	0.272373	0.690937	0.099182	-0.7472
	0.273707	0.692368	0.098705	-0.74673
	0.27504	0.694275	0.098228	-0.74625
	0.276373	0.696182	0.097275	-0.74673
	0.277707	0.698566	0.096321	-0.7472
	0.27904	0.700474	0.095844	-0.74863
	0.280373	0.701427	0.094891	-0.7515
	0.281707	0.701427	0.093937	-0.75436
	0.28304	0.701427	0.09346	-0.75769
	0.284373	0.701427	0.092983	-0.7596
	0.285707	0.702858	0.09203	-0.76056
	0.28704	0.705242	0.091553	-0.76103
	0.288373	0.708103	0.09203	-0.76151
	0.289707	0.712395	0.092983	-0.76246
	0.29104	0.715733	0.092983	-0.76342
	0.292373	0.718117	0.09346	-0.76437
	0.293707	0.71907	0.09346	-0.76675
	0.29504	0.720024	0.09346	-0.76962
	0.296373	0.720978	0.092506	-0.77248
	0.297707	0.722885	0.091553	-0.77581
	0.29904	0.724316	0.091553	-0.77868
	0.300373	0.726223	0.09203	-0.78154
	0.301707	0.727654	0.09203	-0.7844
	0.30304	0.729084	0.091553	-0.78678
	0.304373	0.730038	0.091076	-0.78821
	0.305707	0.730991	0.090122	-0.78869
	0.30704	0.732899	0.089169	-0.78964
	0.308373	0.736237	0.088692	-0.79012
	0.309707	0.739098	0.088692	-0.7906
	0.31104	0.741959	0.088692	-0.79155
	0.312373	0.74482	0.089169	-0.79298
	0.313707	0.747204	0.088215	-0.79489
	0.31504	0.749588	0.087738	-0.79679
	0.316373	0.751495	0.087738	-0.7987
	0.317707	0.753403	0.087261	-0.80013
	0.31904	0.755787	0.086784	-0.80204
	0.320373	0.758648	0.086784	-0.80395
	0.321707	0.761509	0.086784	-0.80585
	0.32304	0.763893	0.085831	-0.80776
	0.324373	0.7658	0.083447	-0.80919
	0.325707	0.768185	0.082016	-0.81062
	0.32704	0.770092	0.081539	-0.8111
	0.328373	0.770569	0.081062	-0.8111
	0.329707	0.770569	0.080585	-0.81062
	0.33104	0.771046	0.079155	-0.8111
	0.332373	0.772476	0.079155	-0.81301
	0.333707	0.775337	0.079155	-0.81539
	0.33504	0.778198	0.079155	-0.81825
	0.336373	0.781059	0.078678	-0.82159
	0.337707	0.784397	0.079155	-0.82493
	0.33904	0.787735	0.080109	-0.82779
	0.340373	0.790119	0.080585	-0.8297
	0.341707	0.79155	0.080109	-0.8316
	0.34304	0.79298	0.079155	-0.83351
	0.344373	0.794888	0.078201	-0.83447
	0.345707	0.797272	0.076771	-0.83542
	0.34704	0.800133	0.07534	-0.83637
	0.348373	0.802517	0.074387	-0.83733
	0.349707	0.804901	0.072956	-0.83923
	0.35104	0.806808	0.071526	-0.84162
	0.352373	0.809193	0.069141	-0.84448
	0.353707	0.811577	0.066757	-0.84734
	0.35504	0.813961	0.064373	-0.85068
	0.356373	0.817299	0.061512	-0.85402
	0.357707	0.820637	0.059128	-0.8564
	0.35904	0.824451	0.05722	-0.85831
	0.360373	0.826836	0.05579	-0.86069
	0.361707	0.828266	0.05579	-0.86308
	0.36304	0.828743	0.056267	-0.86451
	0.364373	0.829697	0.05722	-0.86403
	0.365707	0.831127	0.058651	-0.86308
	0.36704	0.832081	0.060081	-0.86308
	0.368373	0.833988	0.061512	-0.86355
	0.369707	0.835896	0.061512	-0.86498
	0.37104	0.837803	0.060558	-0.86689
	0.372373	0.839233	0.059128	-0.87023
	0.373707	0.840187	0.056744	-0.87404
	0.37504	0.841141	0.054359	-0.87738
	0.376373	0.843048	0.051975	-0.87881
	0.377707	0.845432	0.051022	-0.87929
	0.37904	0.847816	0.050068	-0.88072
	0.380373	0.849724	0.050068	-0.8831
	0.381707	0.851154	0.049591	-0.88644
	0.38304	0.852108	0.050068	-0.88978
	0.384373	0.853062	0.049591	-0.89407
	0.385707	0.854492	0.049114	-0.89788
	0.38704	0.855446	0.048161	-0.90027
	0.388373	0.85783	0.047207	-0.90122
	0.389707	0.860691	0.046253	-0.9017
	0.39104	0.863075	0.0453	-0.90218
	0.392373	0.865459	0.0453	-0.90313
	0.393707	0.867367	0.044823	-0.90408
	0.39504	0.869751	0.044823	-0.90647
	0.396373	0.872135	0.044346	-0.90885
	0.397707	0.874996	0.043392	-0.91171
	0.39904	0.877857	0.041962	-0.91362
	0.400373	0.880718	0.040531	-0.916
	0.401707	0.883579	0.039101	-0.91839
	0.40304	0.885487	0.038147	-0.92173
	0.404373	0.887394	0.03767	-0.92506
	0.405707	0.888824	0.03767	-0.92793
	0.40704	0.890255	0.038624	-0.93079
	0.408373	0.892162	0.040054	-0.93269
	0.409707	0.89407	0.041008	-0.93412
	0.41104	0.896454	0.041008	-0.93603
	0.412373	0.898838	0.039577	-0.93794
	0.413707	0.901699	0.038147	-0.94032
	0.41504	0.904083	0.035286	-0.94271
	0.416373	0.906944	0.031948	-0.94557
	0.417707	0.909328	0.028133	-0.94843
	0.41904	0.912666	0.024319	-0.95081
	0.420373	0.915527	0.021458	-0.95224
	0.421707	0.918388	0.01955	-0.95415
	0.42304	0.920296	0.019073	-0.95654
	0.424373	0.921726	0.019073	-0.95844
	0.425707	0.923157	0.01955	-0.95987
	0.42704	0.92411	0.020027	-0.96178
	0.428373	0.92411	0.020504	-0.96512
	0.429707	0.92411	0.020504	-0.96798
	0.43104	0.924587	0.020027	-0.97132
	0.432373	0.925541	0.019073	-0.97418
	0.433707	0.926971	0.018597	-0.97704
	0.43504	0.929356	0.01812	-0.97895
	0.436373	0.931263	0.01812	-0.9799
	0.437707	0.933647	0.017643	-0.98038
	0.43904	0.936031	0.017166	-0.98085
	0.440373	0.937939	0.016212	-0.98133
	0.441707	0.938892	0.015736	-0.98181
	0.44304	0.9408	0.014782	-0.98372
	0.444373	0.942707	0.013828	-0.98562
	0.445707	0.945091	0.012398	-0.98801
	0.44704	0.947952	0.011444	-0.99087
	0.448373	0.951767	0.011444	-0.99373
	0.449707	0.954628	0.011921	-0.99611
	0.45104	0.957489	0.012875	-0.9985
	0.452373	0.959873	0.013351	-1.00088
	0.453707	0.962734	0.013828	-1.00327
	0.45504	0.966072	0.014305	-1.00517
	0.456373	0.967979	0.014305	-1.00756
	0.457707	0.969887	0.013828	-1.00946
	0.45904	0.971794	0.012875	-1.01089
	0.460373	0.973225	0.011921	-1.01233
	0.461707	0.974655	0.010967	-1.01328
	0.46304	0.975609	0.009537	-1.01471
	0.464373	0.976086	0.008583	-1.01709
	0.465707	0.977516	0.00906	-1.01995
	0.46704	0.978947	0.009537	-1.02329
	0.468373	0.981331	0.00906	-1.02711
	0.469707	0.983238	0.00906	-1.02997
	0.47104	0.986099	0.00906	-1.0314
	0.472373	0.989437	0.008106	-1.03331
	0.473707	0.992298	0.005722	-1.03521
	0.47504	0.994205	0.003338	-1.0376
	0.476373	0.995159	0.001907	-1.03998
	0.477707	0.995636	0.000477	-1.04332
	0.47904	0.996113	-0.00048	-1.04713
	0.480373	0.997066	-0.00095	-1.05095
	0.481707	0.998974	-0.00048	-1.05381
	0.48304	1.00088	-0.00048	-1.05572
	0.484373	1.00374	0	-1.0581
	0.485707	1.0066	0.000477	-1.06001
	0.48704	1.01042	0.000477	-1.06192
	0.488373	1.01376	0	-1.06382
	0.489707	1.01709	-0.00095	-1.06668
	0.49104	1.02043	-0.00143	-1.07002
	0.492373	1.02282	-0.00191	-1.07288
	0.493707	1.02472	-0.00334	-1.07574
	0.49504	1.02568	-0.00477	-1.07861
	0.496373	1.02663	-0.0062	-1.08147
	0.497707	1.02758	-0.00715	-1.08337
	0.49904	1.02902	-0.00858	-1.0848
	0.500373	1.0314	-0.01001	-1.08624
	0.501707	1.03331	-0.01097	-1.08719
	0.50304	1.03474	-0.01144	-1.08862
	0.504373	1.03617	-0.01192	-1.08957
	0.505707	1.03807	-0.0124	-1.09148
	0.50704	1.03998	-0.0124	-1.09386
	0.508373	1.04237	-0.0124	-1.09625
	0.509707	1.0457	-0.01335	-1.10006
	0.51104	1.04952	-0.01431	-1.10388
	0.512373	1.05381	-0.01621	-1.10626
	0.513707	1.05715	-0.01812	-1.10769
	0.51504	1.05953	-0.02003	-1.10817
	0.516373	1.06049	-0.02193	-1.10817
	0.517707	1.06192	-0.02432	-1.10817
	0.51904	1.06382	-0.02575	-1.10817
	0.520373	1.06573	-0.02766	-1.10912
	0.521707	1.06716	-0.02861	-1.11103
	0.52304	1.06811	-0.02956	-1.11389
	0.524373	1.07002	-0.02956	-1.11675
	0.525707	1.07193	-0.02861	-1.11961
	0.52704	1.07288	-0.02718	-1.12247
	0.528373	1.07336	-0.02623	-1.12486
	0.529707	1.07384	-0.02623	-1.12677
	0.53104	1.07574	-0.02623	-1.12867
	0.532373	1.07861	-0.02718	-1.13153
	0.533707	1.08147	-0.02813	-1.13487
	0.53504	1.08433	-0.02861	-1.13821
	0.536373	1.08767	-0.02956	-1.14202
	0.537707	1.09196	-0.03099	-1.14536
	0.53904	1.09529	-0.03195	-1.14822
	0.540373	1.09816	-0.0329	-1.14965
	0.541707	1.10006	-0.0329	-1.14965
	0.54304	1.10292	-0.0329	-1.15013
	0.544373	1.10531	-0.03242	-1.15061
	0.545707	1.10722	-0.03052	-1.15204
	0.54704	1.10865	-0.02861	-1.15395
	0.548373	1.11055	-0.02623	-1.15633
	0.549707	1.11198	-0.02527	-1.15871
	0.55104	1.11294	-0.0248	-1.1611
	0.552373	1.11342	-0.02527	-1.16348
	0.553707	1.11437	-0.02623	-1.16634
	0.55504	1.11675	-0.02766	-1.16825
	0.556373	1.11914	-0.02909	-1.17064
	0.557707	1.12247	-0.03052	-1.17302
	0.55904	1.12581	-0.03099	-1.1754
	0.560373	1.12915	-0.03147	-1.17683
	0.561707	1.13249	-0.03147	-1.17731
	0.56304	1.13583	-0.03099	-1.17826
	0.564373	1.13869	-0.03099	-1.1797
	0.565707	1.14155	-0.03147	-1.18065
	0.56704	1.14441	-0.03195	-1.18113
	0.568373	1.14632	-0.03242	-1.18208
	0.569707	1.14727	-0.03242	-1.18446
	0.57104	1.14775	-0.0329	-1.1878
	0.572373	1.14775	-0.03338	-1.19019
	0.573707	1.14775	-0.03338	-1.19209
	0.57504	1.14822	-0.03242	-1.194
	0.576373	1.14918	-0.03099	-1.19591
	0.577707	1.15108	-0.02909	-1.19734
	0.57904	1.15347	-0.02766	-1.19925
	0.580373	1.15633	-0.02766	-1.20115
	0.581707	1.15871	-0.02813	-1.20401
	0.58304	1.16158	-0.02909	-1.20687
	0.584373	1.16396	-0.03052	-1.20974
	0.585707	1.16682	-0.03195	-1.2126
	0.58704	1.17016	-0.03338	-1.21403
	0.588373	1.17254	-0.03433	-1.21593
	0.589707	1.17445	-0.03433	-1.21784
	0.59104	1.17588	-0.03386	-1.22023
	0.592373	1.17731	-0.03386	-1.22261
	0.593707	1.17874	-0.03386	-1.22547
	0.59504	1.18017	-0.03386	-1.22786
	0.596373	1.18256	-0.03386	-1.23024
	0.597707	1.18542	-0.03386	-1.23167
	0.59904	1.18828	-0.03529	-1.23358
	0.600373	1.19066	-0.03719	-1.23453
	0.601707	1.19305	-0.03862	-1.23549
	0.60304	1.194	-0.04053	-1.23644
	0.604373	1.194	-0.04101	-1.23882
	0.605707	1.19448	-0.04005	-1.24121
	0.60704	1.19495	-0.03862	-1.24311
	0.608373	1.19543	-0.03624	-1.24502
	0.609707	1.19686	-0.03433	-1.24741
	0.61104	1.19924	-0.0329	-1.24931
	0.612373	1.20211	-0.03195	-1.25122
	0.613707	1.20497	-0.03147	-1.25217
	0.61504	1.20735	-0.03242	-1.2536
	0.616373	1.21069	-0.03338	-1.25551
	0.617707	1.21355	-0.03481	-1.2579
	0.61904	1.21593	-0.03624	-1.25933
	0.620373	1.21737	-0.03672	-1.2598
	0.621707	1.2188	-0.03719	-1.26028
	0.62304	1.22023	-0.03719	-1.26028
	0.624373	1.2207	-0.03672	-1.26076
	0.625707	1.22118	-0.03576	-1.26171
	0.62704	1.22213	-0.03529	-1.26266
	0.628373	1.22356	-0.03481	-1.26505
	0.629707	1.22643	-0.03481	-1.26696
	0.63104	1.22881	-0.03529	-1.26886
	0.632373	1.23167	-0.03529	-1.27029
	0.633707	1.23453	-0.03576	-1.27172
	0.63504	1.23692	-0.03624	-1.27316
	0.636373	1.23835	-0.03767	-1.27411
	0.637707	1.23978	-0.03862	-1.27459
	0.63904	1.24168	-0.0391	-1.27602
	0.640373	1.24359	-0.0391	-1.27792
	0.641707	1.24645	-0.03815	-1.27983
	0.64304	1.25027	-0.03672	-1.28078
	0.644373	1.25503	-0.03529	-1.28269
	0.645707	1.25933	-0.03433	-1.2846
	0.64704	1.26219	-0.03386	-1.28698
	0.648373	1.26409	-0.03338	-1.28841
	0.649707	1.266	-0.03386	-1.28984
	0.65104	1.26743	-0.03481	-1.29128
	0.652373	1.26886	-0.03576	-1.29271
	0.653707	1.27029	-0.03624	-1.29414
	0.65504	1.27125	-0.03767	-1.29509
	0.656373	1.27268	-0.0391	-1.29652
	0.657707	1.27363	-0.04005	-1.29747
	0.65904	1.27506	-0.04053	-1.2989
	0.660373	1.27697	-0.04053	-1.30081
	0.661707	1.27935	-0.04005	-1.30272
	0.66304	1.28222	-0.04053	-1.30463
	0.664373	1.28603	-0.04101	-1.3051
	0.665707	1.2908	-0.04148	-1.30653
	0.66704	1.29509	-0.04196	-1.30796
	0.668373	1.29843	-0.04339	-1.30987
	0.669707	1.30129	-0.0453	-1.31273
	0.67104	1.30367	-0.04625	-1.31607
	0.672373	1.3051	-0.04578	-1.31989
	0.673707	1.30558	-0.04482	-1.3237
	0.67504	1.30653	-0.04435	-1.32656
	0.676373	1.30892	-0.04387	-1.32799
	0.677707	1.31178	-0.04292	-1.32942
	0.67904	1.31416	-0.04292	-1.33038
	0.680373	1.31655	-0.04292	-1.33133
	0.681707	1.31893	-0.04292	-1.33276
	0.68304	1.32132	-0.04244	-1.33371
	0.684373	1.32275	-0.04196	-1.33467
	0.685707	1.32465	-0.04053	-1.3361
	0.68704	1.32656	-0.03815	-1.33657
	0.688373	1.32847	-0.03672	-1.33705
	0.689707	1.33038	-0.03576	-1.33801
	0.69104	1.33085	-0.03576	-1.33944
	0.692373	1.33133	-0.03624	-1.34087
	0.693707	1.33133	-0.03672	-1.34277
	0.69504	1.33228	-0.03862	-1.34516
	0.696373	1.33371	-0.04101	-1.34754
	0.697707	1.3361	-0.04339	-1.34993
	0.69904	1.33848	-0.04435	-1.35231
	0.700373	1.34087	-0.04435	-1.35422
	0.701707	1.34325	-0.04482	-1.35565
	0.70304	1.34516	-0.0453	-1.35708
	0.704373	1.34659	-0.04625	-1.35756
	0.705707	1.34802	-0.04578	-1.35756
	0.70704	1.34945	-0.04482	-1.35803
	0.708373	1.35231	-0.04435	-1.35851
	0.709707	1.35517	-0.04339	-1.35994
	0.71104	1.35899	-0.04196	-1.36185
	0.712373	1.36137	-0.04005	-1.36423
	0.713707	1.3628	-0.03862	-1.36709
	0.71504	1.36328	-0.0391	-1.36948
	0.716373	1.36423	-0.04005	-1.37138
	0.717707	1.36423	-0.04101	-1.37234
	0.71904	1.36519	-0.04196	-1.37424
	0.720373	1.36614	-0.04244	-1.37663
	0.721707	1.36805	-0.04292	-1.37854
	0.72304	1.37091	-0.04196	-1.38044
	0.724373	1.37329	-0.04101	-1.38235
	0.725707	1.37472	-0.04005	-1.38426
	0.72704	1.37615	-0.0391	-1.38569
	0.728373	1.37758	-0.03862	-1.38569
	0.729707	1.37854	-0.0391	-1.38474
	0.73104	1.37997	-0.0391	-1.38521
	0.732373	1.3814	-0.0391	-1.38617
	0.733707	1.38331	-0.0391	-1.38807
	0.73504	1.38617	-0.0391	-1.3895
	0.736373	1.38855	-0.0391	-1.39236
	0.737707	1.39046	-0.0391	-1.39523
	0.73904	1.39189	-0.03958	-1.39761
	0.740373	1.39427	-0.04005	-1.39904
	0.741707	1.39713	-0.04053	-1.39999
	0.74304	1.39999	-0.04148	-1.40095
	0.744373	1.40333	-0.04292	-1.40238
	0.745707	1.40667	-0.04435	-1.40381
	0.74704	1.41048	-0.04578	-1.40619
	0.748373	1.41335	-0.04673	-1.40905
	0.749707	1.41525	-0.04673	-1.41239
	0.75104	1.41716	-0.04673	-1.41478
	0.752373	1.42002	-0.04578	-1.41621
	0.753707	1.42288	-0.04435	-1.41668
	0.75504	1.42527	-0.04387	-1.41716
	0.756373	1.42717	-0.04292	-1.41764
	0.757707	1.4286	-0.04292	-1.41811
	0.75904	1.42908	-0.04244	-1.41811
	0.760373	1.42956	-0.04292	-1.41764
	0.761707	1.42956	-0.04292	-1.41764
	0.76304	1.43051	-0.04292	-1.41764
	0.764373	1.4329	-0.04292	-1.41859
	0.765707	1.43623	-0.04292	-1.41954
	0.76704	1.43862	-0.04244	-1.42145
	0.768373	1.441	-0.04196	-1.42336
	0.769707	1.44386	-0.04196	-1.42479
	0.77104	1.44672	-0.04196	-1.42574
	0.772373	1.44911	-0.04292	-1.42622
	0.773707	1.45101	-0.04339	-1.4267
	0.77504	1.4534	-0.04482	-1.42765
	0.776373	1.45626	-0.04625	-1.42908
	0.777707	1.45912	-0.04721	-1.43051
	0.77904	1.46151	-0.04673	-1.43194
	0.780373	1.46294	-0.04578	-1.43337
	0.781707	1.46484	-0.04435	-1.43433
	0.78304	1.46675	-0.04292	-1.4348
	0.784373	1.46961	-0.04196	-1.43671
	0.785707	1.47247	-0.04148	-1.43909
	0.78704	1.47486	-0.04101	-1.44196
	0.788373	1.47772	-0.04196	-1.44434
	0.789707	1.4801	-0.04244	-1.4472
	0.79104	1.48344	-0.04339	-1.45006
	0.792373	1.4863	-0.04339	-1.45245
	0.793707	1.48869	-0.04387	-1.45388
	0.79504	1.49059	-0.04435	-1.45483
	0.796373	1.4925	-0.04482	-1.45531
	0.797707	1.49488	-0.0453	-1.45578
	0.79904	1.49632	-0.04578	-1.45626
	0.800373	1.49775	-0.04625	-1.45674
	0.801707	1.4987	-0.04578	-1.45817
	0.80304	1.49965	-0.0453	-1.4596
	0.804373	1.50108	-0.04482	-1.46198
	0.805707	1.50251	-0.04435	-1.46389
	0.80704	1.50442	-0.04339	-1.4658
	0.808373	1.50633	-0.04196	-1.46723
	0.809707	1.50871	-0.04101	-1.46818
	0.81104	1.51157	-0.04148	-1.46961
	0.812373	1.51396	-0.04196	-1.47152
	0.813707	1.51587	-0.04196	-1.47295
	0.81504	1.51777	-0.04196	-1.47486
	0.816373	1.5192	-0.04196	-1.47676
	0.817707	1.52111	-0.04292	-1.47915
	0.81904	1.52302	-0.04292	-1.48153
	0.820373	1.5254	-0.04292	-1.48296
	0.821707	1.52874	-0.04292	-1.48344
	0.82304	1.53208	-0.04292	-1.48439
	0.824373	1.53542	-0.04292	-1.48487
	0.825707	1.53875	-0.04292	-1.48535
	0.82704	1.54209	-0.04339	-1.48582
	0.828373	1.54543	-0.04482	-1.48678
	0.829707	1.54686	-0.04625	-1.48821
	0.83104	1.54829	-0.04673	-1.49012
	0.832373	1.5502	-0.04673	-1.4925
	0.833707	1.55211	-0.04578	-1.49393
	0.83504	1.55354	-0.04387	-1.49536
	0.836373	1.55497	-0.04148	-1.49727
	0.837707	1.5583	-0.03815	-1.49965
	0.83904	1.56164	-0.03529	-1.50156
	0.840373	1.56403	-0.03433	-1.50299
	0.841707	1.56641	-0.03386	-1.50394
	0.84304	1.56832	-0.03386	-1.5049
	0.844373	1.56975	-0.03529	-1.50633
	0.845707	1.57022	-0.03719	-1.50728
	0.84704	1.57118	-0.03815	-1.50824
	0.848373	1.57261	-0.03815	-1.51014
	0.849707	1.57499	-0.03767	-1.513
	0.85104	1.57738	-0.03672	-1.51634
	0.852373	1.58024	-0.03576	-1.51825
	0.853707	1.58215	-0.03481	-1.51968
	0.85504	1.58453	-0.03433	-1.52159
	0.856373	1.58644	-0.03433	-1.52349
	0.857707	1.58787	-0.03433	-1.52445
	0.85904	1.58977	-0.03433	-1.52493
	0.860373	1.59216	-0.03386	-1.5254
	0.861707	1.5955	-0.03433	-1.52683
	0.86304	1.59836	-0.03481	-1.52779
	0.864373	1.6017	-0.03576	-1.52779
	0.865707	1.60456	-0.03672	-1.52779
	0.86704	1.60694	-0.03767	-1.52874
	0.868373	1.60885	-0.03815	-1.52969
	0.869707	1.61076	-0.03862	-1.53065
	0.87104	1.61219	-0.03862	-1.5316
	0.872373	1.61314	-0.03862	-1.53255
	0.873707	1.61409	-0.03862	-1.53399
	0.87504	1.61552	-0.03719	-1.53494
	0.876373	1.61695	-0.03529	-1.53589
	0.877707	1.61886	-0.0329	-1.53589
	0.87904	1.62077	-0.03099	-1.53637
	0.880373	1.62363	-0.02956	-1.5378
	0.881707	1.62601	-0.02861	-1.54018
	0.88304	1.62888	-0.02766	-1.54257
	0.884373	1.63174	-0.02718	-1.54543
	0.885707	1.6346	-0.02718	-1.54829
	0.88704	1.63651	-0.0267	-1.55115
	0.888373	1.63841	-0.02623	-1.55354
	0.889707	1.63937	-0.0267	-1.55449
	0.89104	1.6408	-0.02766	-1.55497
	0.892373	1.64223	-0.02861	-1.55544
	0.893707	1.64413	-0.02956	-1.55544
	0.89504	1.64604	-0.03004	-1.55544
	0.896373	1.64843	-0.03052	-1.55592
	0.897707	1.65081	-0.03052	-1.55592
	0.89904	1.65415	-0.03004	-1.55687
	0.900373	1.65653	-0.02956	-1.5583
	0.901707	1.65892	-0.02956	-1.5583
	0.90304	1.66082	-0.02909	-1.5583
	0.904373	1.66273	-0.02956	-1.5583
	0.905707	1.66511	-0.02956	-1.55783
	0.90704	1.66702	-0.02956	-1.5564
	0.908373	1.66941	-0.03052	-1.55544
	0.909707	1.67227	-0.03242	-1.55592
	0.91104	1.67513	-0.03433	-1.55687
	0.912373	1.67751	-0.03529	-1.55878
	0.913707	1.68037	-0.03672	-1.56021
	0.91504	1.68324	-0.03767	-1.5626
	0.916373	1.68562	-0.03767	-1.56546
	0.917707	1.68848	-0.03624	-1.56879
	0.91904	1.69039	-0.03481	-1.57118
	0.920373	1.6923	-0.03433	-1.57309
	0.921707	1.69373	-0.03338	-1.57452
	0.92304	1.69516	-0.03242	-1.57595
	0.924373	1.69706	-0.03195	-1.5769
	0.925707	1.69897	-0.03195	-1.5769
	0.92704	1.70135	-0.0329	-1.57642
	0.928373	1.70469	-0.03433	-1.57642
	0.929707	1.70755	-0.03624	-1.57738
	0.93104	1.71042	-0.03862	-1.57738
	0.932373	1.71232	-0.04005	-1.5769
	0.933707	1.71375	-0.04005	-1.57785
	0.93504	1.71518	-0.0391	-1.57928
	0.936373	1.71661	-0.03815	-1.58072
	0.937707	1.71804	-0.03672	-1.58119
	0.93904	1.71948	-0.03481	-1.58167
	0.940373	1.72138	-0.03386	-1.58262
	0.941707	1.72281	-0.03338	-1.58358
	0.94304	1.72424	-0.03242	-1.58405
	0.944373	1.7252	-0.03052	-1.58501
	0.945707	1.72567	-0.02861	-1.58644
	0.94704	1.7271	-0.02766	-1.58834
	0.948373	1.72901	-0.02718	-1.58978
	0.949707	1.73092	-0.0267	-1.59073
	0.95104	1.73235	-0.02623	-1.59121
	0.952373	1.73473	-0.02623	-1.59264
	0.953707	1.73712	-0.02527	-1.59407
	0.95504	1.74046	-0.0248	-1.5955
	0.956373	1.74379	-0.0248	-1.5974
	0.957707	1.74666	-0.02527	-1.59931
	0.95904	1.74856	-0.02575	-1.60074
	0.960373	1.75095	-0.02623	-1.60074
	0.961707	1.75285	-0.02623	-1.60027
	0.96304	1.75476	-0.0267	-1.60074
	0.964373	1.75667	-0.0267	-1.60122
	0.965707	1.75905	-0.02575	-1.60217
	0.96704	1.76144	-0.02623	-1.6036
	0.968373	1.76334	-0.02623	-1.60503
	0.969707	1.76525	-0.0267	-1.60599
	0.97104	1.76716	-0.02623	-1.60694
	0.972373	1.76907	-0.02527	-1.60742
	0.973707	1.77193	-0.02432	-1.60837
	0.97504	1.77527	-0.02337	-1.61028
	0.976373	1.77813	-0.02289	-1.61314
	0.977707	1.78099	-0.02289	-1.616
	0.97904	1.78289	-0.02289	-1.61791
	0.980373	1.7848	-0.02337	-1.61886
	0.981707	1.78623	-0.02337	-1.61839
	0.98304	1.78814	-0.02289	-1.61791
	0.984373	1.791	-0.02193	-1.61743
	0.985707	1.79386	-0.02146	-1.61743
	0.98704	1.7972	-0.0205	-1.61791
	0.988373	1.80054	-0.01907	-1.61934
	0.989707	1.80387	-0.01669	-1.62029
	0.99104	1.80674	-0.01431	-1.62077
	0.992373	1.80864	-0.0124	-1.62029
	0.993707	1.81055	-0.01049	-1.61934
	0.99504	1.81246	-0.00906	-1.61791
	0.996373	1.81389	-0.00811	-1.61743
	0.997707	1.81484	-0.00763	-1.61743
	0.99904	1.81675	-0.0062	-1.61743
	1.00037	1.81913	-0.00525	-1.61743
	1.00171	1.82152	-0.00334	-1.61839
	1.00304	1.82343	-0.00143	-1.61934
	1.00437	1.82581	0.001431	-1.62029
	1.00571	1.82915	0.003338	-1.61982
	1.00704	1.83296	0.005245	-1.62029
	1.00837	1.83725	0.006676	-1.62029
	1.00971	1.84202	0.008583	-1.62077
	1.01104	1.84679	0.010014	-1.62125
	1.01237	1.85156	0.011444	-1.62125
	1.01371	1.85537	0.013828	-1.62125
	1.01504	1.85776	0.017166	-1.62125
	1.01637	1.86014	0.021458	-1.62029
	1.01771	1.86253	0.026703	-1.61934
	1.01904	1.86634	0.033855	-1.61743
	1.02037	1.87016	0.040531	-1.61552
	1.02171	1.87445	0.046253	-1.61362
	1.02304	1.87874	0.051975	-1.61171
	1.02437	1.88303	0.056744	-1.6098
	1.02571	1.88685	0.061035	-1.60837
	1.02704	1.89066	0.065327	-1.60694
	1.02837	1.89495	0.069618	-1.60599
	1.02971	1.89924	0.074387	-1.60503
	1.03104	1.90449	0.078678	-1.6036
	1.03237	1.90973	0.083447	-1.60074
	1.03371	1.91498	0.087738	-1.5974
	1.03504	1.9207	0.091553	-1.59454
	1.03637	1.92547	0.095367	-1.59216
	1.03771	1.93024	0.098705	-1.58978
	1.03904	1.93548	0.102997	-1.58739
	1.04037	1.9412	0.107288	-1.58548
	1.04171	1.94645	0.112057	-1.5831
	1.04304	1.95169	0.116348	-1.57976
	1.04437	1.95694	0.121593	-1.57499
	1.04571	1.96219	0.126362	-1.56975
	1.04704	1.96695	0.13113	-1.56546
	1.04837	1.97172	0.135422	-1.56212
	1.04971	1.97697	0.139713	-1.55878
	1.05104	1.98174	0.143528	-1.55592
	1.05237	1.9865	0.146866	-1.55306
	1.05371	1.99127	0.150681	-1.55067
	1.05504	1.99604	0.154495	-1.54781
	1.05637	2.00033	0.15831	-1.54448
	1.05771	2.00367	0.161648	-1.54114
	1.05904	2.00796	0.164986	-1.53828
	1.06037	2.01321	0.1688	-1.53494
	1.06171	2.01893	0.172615	-1.53065
	1.06304	2.02513	0.175953	-1.5254
	1.06437	2.03133	0.179291	-1.51873
	1.06571	2.03753	0.183105	-1.51253
	1.06704	2.0442	0.18692	-1.50633
	1.06837	2.04945	0.190258	-1.49965
	1.06971	2.05421	0.194073	-1.49345
	1.07104	2.05898	0.197887	-1.48726
	1.07237	2.06423	0.201702	-1.48058
	1.07371	2.07043	0.20504	-1.47343
	1.07504	2.0771	0.208378	-1.4658
	1.07637	2.08473	0.211239	-1.45864
	1.07771	2.09284	0.215054	-1.45149
	1.07904	2.10047	0.219345	-1.44577
	1.08037	2.10762	0.222683	-1.44053
	1.08171	2.1143	0.225067	-1.43623
	1.08304	2.11954	0.227451	-1.43242
	1.08437	2.12526	0.229359	-1.42717
	1.08571	2.13098	0.231266	-1.42145
	1.08704	2.13766	0.234127	-1.41478
	1.08837	2.14434	0.237942	-1.4081
	1.08971	2.15054	0.244141	-1.39999
	1.09104	2.15769	0.250816	-1.39141
	1.09237	2.16532	0.257015	-1.38283
	1.09371	2.17342	0.263691	-1.37424
	1.09504	2.18153	0.26989	-1.36662
	1.09637	2.19059	0.276089	-1.35851
	1.09771	2.2006	0.282764	-1.3504
	1.09904	2.21109	0.28944	-1.3423
	1.10037	2.22063	0.296593	-1.33419
	1.10171	2.22969	0.304222	-1.32608
	1.10304	2.23923	0.311852	-1.3175
	1.10437	2.24781	0.318527	-1.30892
	1.10571	2.25592	0.324726	-1.30129
	1.10704	2.26355	0.330448	-1.29509
	1.10837	2.2707	0.33617	-1.28937
	1.10971	2.27833	0.342369	-1.28317
	1.11104	2.28643	0.348091	-1.27697
	1.11237	2.29406	0.352859	-1.27077
	1.11371	2.30217	0.357628	-1.26505
	1.11504	2.3098	0.362396	-1.2598
	1.11637	2.31648	0.366688	-1.25504
	1.11771	2.32267	0.370026	-1.2517
	1.11904	2.32744	0.373363	-1.24884
	1.12037	2.33126	0.376225	-1.24693
	1.12171	2.3346	0.378132	-1.2455
	1.12304	2.33793	0.380039	-1.24359
	1.12437	2.34175	0.381947	-1.24168
	1.12571	2.34604	0.383377	-1.2393
	1.12704	2.35033	0.383377	-1.23787
	1.12837	2.35462	0.383854	-1.23644
	1.12971	2.35796	0.384808	-1.23501
	1.13104	2.36082	0.385761	-1.23501
	1.13237	2.36225	0.386238	-1.23549
	1.13371	2.3632	0.386238	-1.23835
	1.13504	2.36416	0.386238	-1.24168
	1.13637	2.36463	0.385761	-1.2455
	1.13771	2.36463	0.383854	-1.24931
	1.13904	2.36463	0.380993	-1.25313
	1.14037	2.36511	0.378132	-1.25647
	1.14171	2.36559	0.376701	-1.26076
	1.14304	2.36559	0.375748	-1.26457
	1.14437	2.36463	0.374794	-1.26839
	1.14571	2.36463	0.374794	-1.27268
	1.14704	2.36463	0.375748	-1.27745
	1.14837	2.36416	0.375271	-1.28222
	1.14971	2.3632	0.372887	-1.28651
	1.15104	2.36273	0.369549	-1.2908
	1.15237	2.36225	0.365257	-1.29509
	1.15371	2.36082	0.360489	-1.30033
	1.15504	2.35891	0.355721	-1.30558
	1.15637	2.35605	0.351429	-1.31083
	1.15771	2.35414	0.349045	-1.31607
	1.15904	2.35224	0.347614	-1.32132
	1.16037	2.35081	0.346184	-1.32751
	1.16171	2.34938	0.3438	-1.33419
	1.16304	2.34842	0.341415	-1.34087
	1.16437	2.34747	0.338078	-1.34754
	1.16571	2.34652	0.333786	-1.35422
	1.16704	2.34461	0.329494	-1.36042
	1.16837	2.34175	0.325203	-1.36518
	1.16971	2.33889	0.320911	-1.36948
	1.17104	2.33746	0.317574	-1.37377
	1.17237	2.33698	0.313759	-1.37854
	1.17371	2.33746	0.309944	-1.38378
	1.17504	2.33793	0.306606	-1.38903
	1.17637	2.33889	0.303268	-1.39427
	1.17771	2.34079	0.299931	-1.39952
	1.17904	2.3427	0.29707	-1.40429
	1.18037	2.34318	0.295162	-1.40905
	1.18171	2.34318	0.292778	-1.41335
	1.18304	2.3427	0.290394	-1.41811
	1.18437	2.3427	0.288963	-1.42431
	1.18571	2.34175	0.287056	-1.43051
	1.18704	2.33984	0.284672	-1.43623
	1.18837	2.33746	0.282764	-1.441
	1.18971	2.33555	0.28038	-1.44434
	1.19104	2.33364	0.278473	-1.44815
	1.19237	2.33221	0.276089	-1.45149
	1.19371	2.33126	0.273705	-1.45483
	1.19504	2.33173	0.271797	-1.45912
	1.19637	2.33316	0.268936	-1.46294
	1.19771	2.33507	0.266075	-1.46723
	1.19904	2.33698	0.263214	-1.47104
	1.20037	2.33841	0.260353	-1.47438
	1.20171	2.34032	0.257492	-1.4782
	1.20304	2.34079	0.255108	-1.48201
	1.20437	2.34079	0.253677	-1.48487
	1.20571	2.34127	0.25177	-1.48869
	1.20704	2.3427	0.25034	-1.4925
	1.20837	2.34461	0.248909	-1.49632
	1.20971	2.34699	0.248432	-1.49965
	1.21104	2.34938	0.247478	-1.50299
	1.21237	2.35176	0.246048	-1.50585
	1.21371	2.35414	0.245094	-1.50824
	1.21504	2.35605	0.244141	-1.50967
	1.21637	2.35748	0.243187	-1.51062
	1.21771	2.35796	0.241756	-1.51205
	1.21904	2.35891	0.239849	-1.51348
	1.22037	2.35939	0.238895	-1.51587
	1.22171	2.35987	0.237465	-1.51873
	1.22304	2.36082	0.235558	-1.52159
	1.22437	2.36177	0.233173	-1.52397
	1.22571	2.36368	0.231266	-1.5254
	1.22704	2.36607	0.229836	-1.52683
	1.22837	2.36845	0.229359	-1.52874
	1.22971	2.37036	0.229836	-1.53112
	1.23104	2.37179	0.231266	-1.53303
	1.23237	2.3737	0.23222	-1.53542
	1.23371	2.3756	0.23365	-1.53732
	1.23504	2.37751	0.234604	-1.53923
	1.23637	2.37942	0.235558	-1.53923
	1.23771	2.38132	0.236511	-1.53923
	1.23904	2.38323	0.236988	-1.53923
	1.24037	2.38466	0.237942	-1.54018
	1.24171	2.38609	0.239372	-1.54161
	1.24304	2.388	0.240326	-1.544
	1.24437	2.39086	0.240326	-1.54734
	1.24571	2.39515	0.239849	-1.54972
	1.24704	2.39945	0.238895	-1.5521
	1.24837	2.40421	0.237942	-1.55449
	1.24971	2.40898	0.237942	-1.55592
	1.25104	2.41327	0.237942	-1.55687
	1.25237	2.41566	0.237942	-1.55783
	1.25371	2.41756	0.237942	-1.55878
	1.25504	2.41852	0.237942	-1.56021
	1.25637	2.41899	0.237942	-1.56116
	1.25771	2.41899	0.237465	-1.5626
	1.25904	2.41899	0.237942	-1.56403
	1.26037	2.41995	0.238895	-1.56593
	1.26171	2.42138	0.239849	-1.56832
	1.26304	2.42424	0.240326	-1.5707
	1.26437	2.42806	0.240326	-1.57356
	1.26571	2.43235	0.239849	-1.57595
	1.26704	2.43664	0.239372	-1.57833
	1.26837	2.44093	0.238895	-1.57976
	1.26971	2.44522	0.238895	-1.58024
	1.27104	2.44808	0.239849	-1.57976
	1.27237	2.45094	0.24128	-1.57928
	1.27371	2.45333	0.24271	-1.57928
	1.27504	2.45571	0.244617	-1.57928
	1.27637	2.45762	0.246048	-1.58024
	1.27771	2.45953	0.247478	-1.58167
	1.27904	2.46239	0.248909	-1.5831
	1.28037	2.46525	0.249386	-1.58358
	1.28171	2.46811	0.249863	-1.5831
	1.28304	2.47097	0.25034	-1.58167
	1.28437	2.47431	0.250816	-1.58072
	1.28571	2.4786	0.25177	-1.57928
	1.28704	2.48337	0.252247	-1.57928
	1.28837	2.48814	0.253677	-1.57928
	1.28971	2.49243	0.254631	-1.58024
	1.29104	2.49624	0.255585	-1.58119
	1.29237	2.49958	0.256062	-1.58215
	1.29371	2.50339	0.256538	-1.5831
	1.29504	2.50673	0.257492	-1.58358
	1.29637	2.51055	0.258923	-1.58405
	1.29771	2.51436	0.261307	-1.58453
	1.29904	2.51865	0.264168	-1.58405
	1.30037	2.52294	0.266552	-1.58358
	1.30171	2.52676	0.267982	-1.5831
	1.30304	2.52962	0.268936	-1.5831
	1.30437	2.53248	0.26989	-1.5831
	1.30571	2.53487	0.26989	-1.5831
	1.30704	2.5382	0.26989	-1.58215
	1.30837	2.54154	0.26989	-1.58167
	1.30971	2.54536	0.27132	-1.58024
	1.31104	2.54965	0.273228	-1.57881
	1.31237	2.55442	0.275612	-1.57738
	1.31371	2.55966	0.277519	-1.57642
	1.31504	2.56491	0.278473	-1.57595
	1.31637	2.5692	0.279903	-1.57499
	1.31771	2.57349	0.281334	-1.57404
	1.31904	2.57873	0.281811	-1.57261
	1.32037	2.5835	0.283241	-1.5707
	1.32171	2.58779	0.286102	-1.56832
	1.32304	2.59256	0.28944	-1.56641
	1.32437	2.59733	0.292301	-1.56498
	1.32571	2.6021	0.295162	-1.56355
	1.32704	2.60639	0.2985	-1.5626
	1.32837	2.60973	0.301838	-1.56164
	1.32971	2.61307	0.304699	-1.56116
	1.33104	2.6164	0.30756	-1.56164
	1.33237	2.6207	0.310421	-1.56212
	1.33371	2.62547	0.313282	-1.56164
	1.33504	2.63071	0.316143	-1.56021
	1.33637	2.63643	0.318527	-1.55783
	1.33771	2.64311	0.320911	-1.55497
	1.33904	2.64978	0.323772	-1.55258
	1.34037	2.65598	0.326157	-1.5502
	1.34171	2.66218	0.328064	-1.54781
	1.34304	2.6679	0.329494	-1.54638
	1.34437	2.67315	0.330925	-1.54591
	1.34571	2.67792	0.332355	-1.54543
	1.34704	2.68221	0.335217	-1.54495
	1.34837	2.6865	0.339031	-1.54448
	1.34971	2.69127	0.342846	-1.54448
	1.35104	2.69651	0.346184	-1.54448
	1.35237	2.70128	0.349998	-1.544
	1.35371	2.70653	0.35429	-1.54209
	1.35504	2.71225	0.358105	-1.54018
	1.35637	2.71797	0.360966	-1.5378
	1.35771	2.72322	0.363827	-1.53542
	1.35904	2.72894	0.367165	-1.53351
	1.36037	2.73466	0.370979	-1.53208
	1.36171	2.73991	0.37384	-1.5316
	1.36304	2.74467	0.375748	-1.53112
	1.36437	2.74897	0.378132	-1.52969
	1.36571	2.75373	0.380993	-1.52779
	1.36704	2.75898	0.384808	-1.52493
	1.36837	2.7647	0.388145	-1.52159
	1.36971	2.77138	0.391006	-1.51825
	1.37104	2.77853	0.393867	-1.51491
	1.37237	2.78521	0.397682	-1.51157
	1.37371	2.79236	0.401974	-1.50871
	1.37504	2.79903	0.405788	-1.50585
	1.37637	2.80476	0.409603	-1.50299
	1.37771	2.81095	0.413895	-1.50013
	1.37904	2.81715	0.418663	-1.49679
	1.38037	2.82335	0.423431	-1.49298
	1.38171	2.8286	0.4282	-1.48869
	1.38304	2.8348	0.433445	-1.48392
	1.38437	2.84147	0.438213	-1.4801
	1.38571	2.84863	0.442028	-1.47629
	1.38704	2.85578	0.445843	-1.47295
	1.38837	2.86293	0.449657	-1.47009
	1.38971	2.87008	0.453472	-1.46723
	1.39104	2.87676	0.457764	-1.46389
	1.39237	2.88248	0.462055	-1.4596
	1.39371	2.88868	0.466824	-1.45531
	1.39504	2.89535	0.471592	-1.45006
	1.39637	2.90251	0.475407	-1.44577
	1.39771	2.90918	0.479221	-1.44243
	1.39904	2.91634	0.482559	-1.43909
	1.40037	2.92301	0.486851	-1.43528
	1.40171	2.92969	0.492096	-1.43147
	1.40304	2.93589	0.498295	-1.42813
	1.40437	2.94209	0.504017	-1.42431
	1.40571	2.94924	0.509262	-1.4205
	1.40704	2.95734	0.513554	-1.41668
	1.40837	2.96545	0.518322	-1.41287
	1.40971	2.97403	0.52309	-1.40953
	1.41104	2.98309	0.528336	-1.40524
	1.41237	2.99215	0.533104	-1.40095
	1.41371	3.00074	0.538826	-1.39618
	1.41504	3.00932	0.545502	-1.39141
	1.41637	3.01743	0.551701	-1.38712
	1.41771	3.02601	0.557423	-1.38187
	1.41904	3.03364	0.563145	-1.37568
	1.42037	3.04079	0.568867	-1.36948
	1.42171	3.04842	0.574589	-1.3628
	1.42304	3.05653	0.580311	-1.3566
	1.42437	3.06463	0.586033	-1.35183
	1.42571	3.07321	0.592232	-1.34802
	1.42704	3.0818	0.599384	-1.34516
	1.42837	3.09086	0.606537	-1.34325
	1.42971	3.09944	0.614166	-1.34134
	1.43104	3.10755	0.621796	-1.33848
	1.43237	3.11613	0.629425	-1.33419
	1.43371	3.12567	0.636578	-1.32942
	1.43504	3.1352	0.64373	-1.32418
	1.43637	3.14379	0.649929	-1.31845
	1.43771	3.15285	0.656605	-1.31178
	1.43904	3.16238	0.662804	-1.3051
	1.44037	3.17097	0.669479	-1.29843
	1.44171	3.17907	0.677109	-1.29223
	1.44304	3.1867	0.684738	-1.28555
	1.44437	3.19529	0.690937	-1.27888
	1.44571	3.2053	0.696659	-1.27316
	1.44704	3.21531	0.701904	-1.26791
	1.44837	3.22485	0.70715	-1.26219
	1.44971	3.23534	0.712872	-1.25504
	1.45104	3.24631	0.719547	-1.24788
	1.45237	3.25727	0.727177	-1.24073
	1.45371	3.26729	0.736237	-1.23358
	1.45504	3.2773	0.745296	-1.2269
	1.45637	3.28731	0.75388	-1.22118
	1.45771	3.29781	0.762463	-1.21546
	1.45904	3.30877	0.770092	-1.21021
	1.46037	3.31879	0.777721	-1.20449
	1.46171	3.3288	0.784874	-1.19781
	1.46304	3.33977	0.792503	-1.19019
	1.46437	3.35121	0.80061	-1.18208
	1.46571	3.36266	0.808239	-1.1735
	1.46704	3.37315	0.816345	-1.16491
	1.46837	3.38316	0.824451	-1.15728
	1.46971	3.39365	0.833511	-1.15013
	1.47104	3.40414	0.842571	-1.14298
	1.47237	3.41463	0.851631	-1.13535
	1.47371	3.42512	0.861168	-1.12677
	1.47504	3.43752	0.871181	-1.11818
	1.47637	3.45039	0.880718	-1.10912
	1.47771	3.46327	0.889301	-1.09959
	1.47904	3.47614	0.898361	-1.09005
	1.48037	3.48902	0.907421	-1.08147
	1.48171	3.50094	0.915527	-1.07288
	1.48304	3.51238	0.923634	-1.06382
	1.48437	3.5243	0.932217	-1.05476
	1.48571	3.53527	0.941753	-1.04523
	1.48704	3.54624	0.951767	-1.03569
	1.48837	3.55768	0.962734	-1.02568
	1.48971	3.5696	0.973225	-1.01566
	1.49104	3.58057	0.983715	-1.00613
	1.49237	3.59154	0.994205	-0.99707
	1.49371	3.60203	1.00422	-0.98753
	1.49504	3.61347	1.01328	-0.97847
	1.49637	3.62492	1.02234	-0.96846
	1.49771	3.63731	1.03188	-0.95797
	1.49904	3.65019	1.04237	-0.94795
	1.50037	3.66354	1.05381	-0.93794
	1.50171	3.67737	1.06478	-0.92793
	1.50304	3.69072	1.07574	-0.91743
	1.50437	3.70312	1.08671	-0.90694
	1.50571	3.71504	1.09816	-0.89693
	1.50704	3.72648	1.1096	-0.88596
	1.50837	3.73936	1.12152	-0.87452
	1.50971	3.75319	1.13344	-0.86355
	1.51104	3.76844	1.14632	-0.85306
	1.51237	3.78513	1.15919	-0.84305
	1.51371	3.80135	1.17159	-0.83208
	1.51504	3.81708	1.18351	-0.82016
	1.51637	3.83186	1.19543	-0.80729
	1.51771	3.84617	1.20735	-0.79441
	1.51904	3.85952	1.21975	-0.78201
	1.52037	3.87192	1.23167	-0.76962
	1.52171	3.88479	1.24455	-0.75769
	1.52304	3.89814	1.25694	-0.74673
	1.52437	3.91245	1.26982	-0.73576
	1.52571	3.92771	1.28222	-0.72384
	1.52704	3.94392	1.29414	-0.71096
	1.52837	3.96061	1.30653	-0.69809
	1.52971	3.97682	1.31941	-0.68521
	1.53104	3.99303	1.33276	-0.67234
	1.53237	4.00972	1.34706	-0.65899
	1.53371	4.02641	1.36185	-0.64516
	1.53504	4.04263	1.37615	-0.63229
	1.53637	4.05836	1.39046	-0.61989
	1.53771	4.0741	1.40381	-0.60749
	1.53904	4.08983	1.41573	-0.59509
	1.54037	4.10557	1.42765	-0.58222
	1.54171	4.12035	1.44053	-0.56934
	1.54304	4.13513	1.45388	-0.55599
	1.54437	4.15087	1.46771	-0.54216
	1.54571	4.16851	1.48106	-0.52834
	1.54704	4.18711	1.49584	-0.51403
	1.54837	4.20523	1.5111	-0.49973
	1.54971	4.2243	1.52731	-0.48494
	1.55104	4.24385	1.54257	-0.47064
	1.55237	4.26245	1.55735	-0.45586
	1.55371	4.27961	1.57309	-0.44107
	1.55504	4.29678	1.58882	-0.42534
	1.55637	4.31395	1.60503	-0.41008
	1.55771	4.33254	1.62077	-0.39482
	1.55904	4.35114	1.63603	-0.37861
	1.56037	4.37021	1.65176	-0.3624
	1.56171	4.39024	1.6675	-0.34618
	1.56304	4.41027	1.68324	-0.33045
	1.56437	4.42934	1.69897	-0.31424
	1.56571	4.44794	1.71518	-0.29802
	1.56704	4.46606	1.73187	-0.28229
	1.56837	4.48465	1.74904	-0.26608
	1.56971	4.50325	1.76716	-0.25034
	1.57104	4.5228	1.7848	-0.23413
	1.57237	4.54235	1.80197	-0.21744
	1.57371	4.56238	1.81913	-0.20075
	1.57504	4.58288	1.8363	-0.18358
	1.57637	4.60386	1.85394	-0.16594
	1.57771	4.62437	1.87206	-0.1483
	1.57904	4.64535	1.89018	-0.13113
	1.58037	4.66633	1.90926	-0.11349
	1.58171	4.68779	1.92881	-0.0968
	1.58304	4.70877	1.94788	-0.07963
	1.58437	4.72975	1.966	-0.06199
	1.58571	4.7512	1.98317	-0.04435
	1.58704	4.77409	2.00081	-0.02623
	1.58837	4.79698	2.01893	-0.00811
	1.58971	4.81939	2.038	0.010014
	1.59104	4.84133	2.05708	0.028133
	1.59237	4.86374	2.0771	0.046253
	1.59371	4.88615	2.09713	0.063896
	1.59504	4.90761	2.11763	0.08297
	1.59637	4.92907	2.13814	0.102997
	1.59771	4.951	2.15816	0.123978
	1.59904	4.97389	2.17819	0.145435
	1.60037	4.99725	2.19822	0.166416
	1.60171	5.02109	2.2192	0.187874
	1.60304	5.04589	2.24113	0.207424
	1.60437	5.07069	2.26307	0.226974
	1.60571	5.09548	2.285	0.246525
	1.60704	5.1198	2.30789	0.267029
	1.60837	5.1446	2.33126	0.28801
	1.60971	5.16892	2.35605	0.310421
	1.61104	5.19276	2.37989	0.333786
	1.61237	5.21708	2.40374	0.357151
	1.61371	5.24282	2.42758	0.380039
	1.61504	5.26905	2.4519	0.402927
	1.61637	5.29575	2.47574	0.426292
	1.61771	5.32246	2.49958	0.449181
	1.61904	5.35011	2.52342	0.471592
	1.62037	5.37729	2.54822	0.494003
	1.62171	5.404	2.57349	0.516891
	1.62304	5.43165	2.59876	0.53978
	1.62437	5.46026	2.62404	0.563145
	1.62571	5.48983	2.64931	0.58794
	1.62704	5.51939	2.6741	0.613213
	1.62837	5.54895	2.69937	0.639439
	1.62971	5.57756	2.72465	0.665188
	1.63104	5.60665	2.7504	0.690937
	1.63237	5.63621	2.77662	0.716209
	1.63371	5.66578	2.80285	0.741005
	1.63504	5.6963	2.83003	0.766754
	1.63637	5.72777	2.85816	0.793457
	1.63771	5.75972	2.88677	0.821114
	1.63904	5.79166	2.91586	0.849724
	1.64037	5.82313	2.94495	0.877857
	1.64171	5.85413	2.97403	0.905991
	1.64304	5.88512	3.00312	0.934124
	1.64437	5.91564	3.03268	0.962257
	1.64571	5.94711	3.06177	0.989914
	1.64704	5.97954	3.09133	1.01757
	1.64837	6.01292	3.12185	1.04523
	1.64971	6.04725	3.1538	1.07384
	1.65104	6.08254	3.18623	1.10245
	1.65237	6.1183	3.21913	1.13153
	1.65371	6.15549	3.25203	1.16205
	1.65504	6.19221	3.28493	1.194
	1.65637	6.22845	3.31783	1.2269
	1.65771	6.26469	3.35169	1.26028
	1.65904	6.3014	3.38507	1.29414
	1.66037	6.3386	3.41892	1.32752
	1.66171	6.37627	3.45373	1.36089
	1.66304	6.41441	3.48949	1.39379
	1.66437	6.45256	3.52621	1.42765
	1.66571	6.49118	3.56245	1.46198
	1.66704	6.53029	3.59917	1.49632
	1.66837	6.56986	3.63684	1.5316
	1.66971	6.60849	3.67546	1.56736
	1.67104	6.64806	3.71456	1.6036
	1.67237	6.68907	3.75319	1.63984
	1.67371	6.73151	3.79181	1.67656
	1.67504	6.77443	3.83043	1.71375
	1.67637	6.81829	3.86858	1.7519
	1.67771	6.86264	3.9072	1.791
	1.67904	6.90746	3.94583	1.82962
	1.68037	6.95276	3.98588	1.86872
	1.68171	6.99758	4.02737	1.9083
	1.68304	7.04336	4.07028	1.94836
	1.68437	7.08914	4.11415	1.98889
	1.68571	7.13539	4.15945	2.03037
	1.68704	7.1826	4.20523	2.07233
	1.68837	7.23076	4.251	2.11525
	1.68971	7.2794	4.29726	2.15864
	1.69104	7.32899	4.34303	2.20251
	1.69237	7.37858	4.38881	2.24733
	1.69371	7.42817	4.43506	2.29263
	1.69504	7.47776	4.48179	2.33793
	1.69637	7.52688	4.529	2.38371
	1.69771	7.57599	4.57716	2.42996
	1.69904	7.62653	4.62627	2.47669
	1.70037	7.67851	4.67539	2.5239
	1.70171	7.73334	4.72546	2.57206
	1.70304	7.78913	4.77696	2.62117
	1.70437	7.84588	4.83084	2.67219
	1.70571	7.9031	4.88567	2.72417
	1.70704	7.96127	4.94242	2.77615
	1.70837	8.01945	5.00011	2.82908
	1.70971	8.07762	5.05829	2.88296
	1.71104	8.13627	5.11503	2.93875
	1.71237	8.19588	5.17273	2.99501
	1.71371	8.25596	5.2309	3.05224
	1.71504	8.31699	5.29051	3.10993
	1.71637	8.37851	5.35107	3.16906
	1.71771	8.4405	5.41258	3.22819
	1.71904	8.50391	5.47647	3.28731
	1.72037	8.56781	5.54132	3.34787
	1.72171	8.63361	5.60617	3.40986
	1.72304	8.70085	5.6715	3.47233
	1.72437	8.76951	5.73778	3.53527
	1.72571	8.84008	5.80597	3.59917
	1.72704	8.91161	5.87559	3.66449
	1.72837	8.98457	5.94568	3.73173
	1.72971	9.058	6.01769	3.79944
	1.73104	9.13143	6.09159	3.86953
	1.73237	9.20486	6.16646	3.94201
	1.73371	9.27925	6.24132	4.01592
	1.73504	9.35459	6.31618	4.09126
	1.73637	9.43184	6.39248	4.1666
	1.73771	9.51242	6.47068	4.24337
	1.73904	9.59492	6.55031	4.32015
	1.74037	9.67884	6.63137	4.39835
	1.74171	9.76324	6.71482	4.4775
	1.74304	9.84907	6.80113	4.55904
	1.74437	9.93538	6.88791	4.64153
	1.74571	10.0222	6.97565	4.72593
	1.74704	10.1099	7.06387	4.81272
	1.74837	10.2005	7.15351	4.90189
	1.74971	10.2935	7.24554	4.99249
	1.75104	10.3884	7.33805	5.08356
	1.75237	10.4842	7.43246	5.17607
	1.75371	10.582	7.52783	5.27048
	1.75504	10.6816	7.62558	5.3668
	1.75637	10.7822	7.72476	5.46503
	1.75771	10.8833	7.82633	5.56517
	1.75904	10.9868	7.93028	5.66864
	1.76037	11.0931	8.03709	5.7745
	1.76171	11.2019	8.14629	5.88274
	1.76304	11.313	8.25787	5.99146
	1.76437	11.4269	8.37088	6.10161
	1.76571	11.5437	8.48436	6.21319
	1.76704	11.663	8.59976	6.32667
	1.76837	11.7831	8.71706	6.44207
	1.76971	11.9047	8.83675	6.55985
	1.77104	12.0287	8.95882	6.68049
	1.77237	12.1555	9.0847	6.80399
	1.77371	12.2843	9.21392	6.92987
	1.77504	12.4145	9.34601	7.05862
	1.77637	12.5461	9.48048	7.1888
	1.77771	12.6796	9.61685	7.32088
	1.77904	12.815	9.75513	7.45487
	1.78037	12.9533	9.8958	7.59172
	1.78171	13.0939	10.0389	7.73048
	1.78304	13.2375	10.1833	7.87163
	1.78437	13.3839	10.3307	8.01563
	1.78571	13.5341	10.4814	8.1625
	1.78704	13.6871	10.6349	8.31127
	1.78837	13.8416	10.7908	8.46195
	1.78971	13.998	10.9491	8.61502
	1.79104	14.1578	11.1103	8.77094
	1.79237	14.3204	11.2734	8.92878
	1.79371	14.4858	11.4384	9.08995
	1.79504	14.6537	11.6057	9.25398
	1.79637	14.8253	11.7765	9.42087
	1.79771	14.9994	11.9505	9.59015
	1.79904	15.1758	12.1288	9.76133
	1.80037	15.3542	12.3095	9.9349
	1.80171	15.5349	12.4927	10.1113
	1.80304	15.718	12.6782	10.2897
	1.80437	15.904	12.8655	10.4709
	1.80571	16.0933	13.0553	10.6549
	1.80704	16.2859	13.2475	10.8423
	1.80837	16.4824	13.4435	11.0326
	1.80971	16.6817	13.6433	11.2243
	1.81104	16.8824	13.8469	11.4188
	1.81237	17.0851	14.0524	11.6153
	1.81371	17.2901	14.2603	11.8146
	1.81504	17.4985	14.4706	12.0163
	1.81637	17.7102	14.6837	12.2218
	1.81771	17.9257	14.8997	12.4302
	1.81904	18.1437	15.1186	12.6405
	1.82037	18.3644	15.3413	12.8522
	1.82171	18.5871	15.5673	13.0658
	1.82304	18.8098	15.7957	13.2813
	1.82437	19.0334	16.0251	13.4988
	1.82571	19.2585	16.2559	13.7181
	1.82704	19.4874	16.4881	13.9403
	1.82837	19.7196	16.7227	14.1659
	1.82971	19.9556	16.9592	14.3943
	1.83104	20.1945	17.1995	14.6246
	1.83237	20.4372	17.4432	14.8559
	1.83371	20.6814	17.6897	15.0871
	1.83504	20.9265	17.9386	15.3208
	1.83637	21.1735	18.1894	15.5578
	1.83771	21.4233	18.4422	15.7981
	1.83904	21.6765	18.6963	16.0403
	1.84037	21.9326	18.9529	16.2849
	1.84171	22.1911	19.2118	16.5319
	1.84304	22.4509	19.4731	16.7789
	1.84437	22.7108	19.7353	17.026
	1.84571	22.9702	19.9981	17.272
	1.84704	23.2291	20.2608	17.52
	1.84837	23.489	20.5236	17.7703
	1.84971	23.7508	20.7872	18.024
	1.85104	24.0164	21.0528	18.28
	1.85237	24.2844	21.3208	18.5375
	1.85371	24.5547	21.5912	18.7955
	1.85504	24.826	21.8649	19.053
	1.85637	25.0983	22.141	19.3105
	1.85771	25.3715	22.4185	19.5694
	1.85904	25.6453	22.696	19.8302
	1.86037	25.9204	22.9731	20.093
	1.86171	26.197	23.2506	20.3576
	1.86304	26.4749	23.5291	20.6256
	1.86437	26.7539	23.8085	20.8941
	1.86571	27.0343	24.0889	21.1625
	1.86704	27.3156	24.3702	21.431
	1.86837	27.5974	24.653	21.7004
	1.86971	27.8788	24.9362	21.9703
	1.87104	28.1615	25.2199	22.2421
	1.87237	28.4467	25.5041	22.5148
	1.87371	28.7342	25.7897	22.789
	1.87504	29.0241	26.0758	23.0651
	1.87637	29.3145	26.3643	23.3421
	1.87771	29.6063	26.6542	23.6197
	1.87904	29.8982	26.9461	23.8981
	1.88037	30.1909	27.2384	24.179
	1.88171	30.4833	27.5312	24.4613
	1.88304	30.7775	27.8239	24.7464
	1.88437	31.0736	28.1177	25.0354
	1.88571	31.373	28.4123	25.3286
	1.88704	31.6744	28.7089	25.6247
	1.88837	31.9767	29.0093	25.9242
	1.88971	32.2795	29.3121	26.227
	1.89104	32.5828	29.6173	26.5331
	1.89237	32.887	29.9244	26.844
	1.89371	33.1931	30.2329	27.1602
	1.89504	33.5035	30.5443	27.4825
	1.89637	33.8187	30.859	27.812
	1.89771	34.1396	31.179	28.1482
	1.89904	34.4658	31.5051	28.4915
	1.90037	34.7962	31.8389	28.842
	1.90171	35.1315	32.1803	29.1996
	1.90304	35.471	32.5284	29.5663
	1.90437	35.8143	32.8832	29.9435
	1.90571	36.1619	33.246	30.3335
	1.90704	36.5176	33.6175	30.7374
	1.90837	36.8829	33.999	31.1565
	1.90971	37.2577	34.3924	31.5919
	1.91104	37.641	34.7991	32.0439
	1.91237	38.0335	35.2201	32.5136
	1.91371	38.4364	35.655	33.0029
	1.91504	38.8503	36.1042	33.5136
	1.91637	39.2766	36.5691	34.0462
	1.91771	39.7172	37.0512	34.6036
	1.91904	40.175	37.5528	35.1877
	1.92037	40.6527	38.0764	35.8009
	1.92171	41.1515	38.6257	36.4442
	1.92304	41.6718	39.2032	37.1184
	1.92437	42.2125	39.8102	37.828
	1.92571	42.7756	40.4472	38.5761
	1.92704	43.3631	41.1153	39.3653
	1.92837	43.9782	41.8172	40.2002
	1.92971	44.6224	42.5558	41.0843
	1.93104	45.2986	43.3354	42.0217
	1.93237	46.0081	44.1594	43.0131
	1.93371	46.7539	45.0316	44.0607
	1.93504	47.5373	45.9552	45.1675
	1.93637	48.3608	46.9313	46.3376
	1.93771	49.2268	47.9627	47.575
	1.93904	50.139	49.0527	48.8844
	1.94037	51.1026	50.2052	50.2715
	1.94171	52.1207	51.4255	51.7421
	1.94304	53.1969	52.7201	53.3009
	1.94437	54.3356	54.0953	54.9502
	1.94571	55.5391	55.5553	56.6955
	1.94704	56.8099	57.1055	58.5413
	1.94837	58.1508	58.7492	60.4935
	1.94971	59.5655	60.4906	62.5591
	1.95104	61.059	62.335	64.7445
	1.95237	62.6359	64.2867	67.0562
	1.95371	64.3024	66.3528	69.5009
	1.95504	66.0629	68.5396	72.0844
	1.95637	67.9216	70.8542	74.8105
	1.95771	69.8829	73.3032	77.683
	1.95904	71.95	75.892	80.7066
	1.96037	74.1277	78.6233	83.889
	1.96171	76.4213	81.5029	87.2364
	1.96304	78.8374	84.5394	90.7579
	1.96437	81.3837	87.7404	94.4605
	1.96571	84.0683	91.1131	98.3505
	1.96704	86.8959	94.666	102.431
	1.96837	89.8705	98.4073	106.705
	1.96971	92.9956	102.343	111.175
	1.97104	96.2758	106.477	115.848
	1.97237	99.7152	110.813	120.731
	1.97371	103.319	115.357	125.833
	1.97504	107.093	120.115	131.166
	1.97637	111.043	125.094	136.736
	1.97771	115.175	130.304	142.548
	1.97904	119.494	135.751	148.604
	1.98037	124.001	141.442	154.905
	1.98171	128.699	147.378	161.453
	1.98304	133.595	153.557	168.249
	1.98437	138.693	159.978	175.295
	1.98571	144.003	166.648	182.601
	1.98704	149.537	173.579	190.177
	1.98837	155.303	180.781	198.022
	1.98971	161.3	188.261	206.125
	1.99104	167.52	196.02	214.472
	1.99237	173.955	204.056	223.054
	1.99371	180.602	212.355	231.867
	1.99504	187.456	220.905	240.915
	1.99637	194.52	229.7	250.206
	1.99771	201.801	238.741	259.75
	1.99904	209.309	248.035	269.558
	2.00037	217.047	257.591	279.625
	2.00171	225.012	267.414	289.937
	2.00304	233.193	277.501	300.473
	2.00437	241.577	287.839	311.215
	2.00571	250.158	298.41	322.156
	2.00704	258.937	309.202	333.286
	2.00837	267.916	320.207	344.603
	2.00971	277.097	331.421	356.094
	2.01104	286.48	342.84	367.742
	2.01237	296.06	354.464	379.52
	2.01371	305.826	366.285	391.402
	2.01504	315.762	378.285	403.364
	2.01637	325.851	390.437	415.395
	2.01771	336.086	402.709	427.488
	2.01904	346.461	415.079	439.636
	2.02037	356.97	427.526	451.835
	2.02171	367.608	440.039	464.073
	2.02304	378.365	452.608	476.327
	2.02437	389.222	465.226	488.566
	2.02571	400.152	477.876	500.759
	2.02704	411.133	490.529	512.883
	2.02837	422.153	503.142	524.928
	2.02971	433.207	515.688	536.885
	2.03104	444.295	528.146	548.75
	2.03237	455.414	540.51	560.508
	2.03371	466.562	552.774	572.133
	2.03504	477.726	564.934	583.586
	2.03637	488.877	576.984	594.83
	2.03771	499.98	588.9	605.838
	2.03904	511.006	600.639	616.599
	2.04037	521.936	612.161	627.111
	2.04171	532.76	623.434	637.382
	2.04304	543.47	634.441	647.416
	2.04437	554.057	645.174	657.207
	2.04571	564.507	655.631	666.729
	2.04704	574.795	665.811	675.938
	2.04837	584.884	675.701	684.803
	2.04971	594.741	685.269	693.306
	2.05104	604.346	694.48	701.441
	2.05237	613.701	703.309	709.211
	2.05371	622.811	711.749	716.622
	2.05504	631.689	719.802	723.681
	2.05637	640.341	727.479	730.379
	2.05771	648.765	734.788	736.689
	2.05904	656.935	741.738	742.582
	2.06037	664.816	748.313	748.047
	2.06171	672.381	754.485	753.086
	2.06304	679.611	760.225	757.712
	2.06437	686.501	765.52	761.947
	2.06571	693.059	770.367	765.809
	2.06704	699.293	774.779	769.304
	2.06837	705.2	778.775	772.416
	2.06971	710.763	782.373	775.122
	2.07104	715.956	785.568	777.403
	2.07237	720.757	788.338	779.255
	2.07371	725.157	790.672	780.691
	2.07504	729.159	792.558	781.73
	2.07637	732.785	794	782.397
	2.07771	736.058	795.011	782.708
	2.07904	738.998	795.625	782.665
	2.08037	741.608	795.875	782.255
	2.08171	743.875	795.772	781.462
	2.08304	745.773	795.313	780.284
	2.08437	747.285	794.484	778.734
	2.08571	748.408	793.271	776.831
	2.08704	749.151	791.667	774.601
	2.08837	749.534	789.683	772.07
	2.08971	749.574	787.345	769.255
	2.09104	749.291	784.681	766.154
	2.09237	748.684	781.717	762.758
	2.09371	747.741	778.467	759.057
	2.09504	746.443	774.931	755.06
	2.09637	744.788	771.103	750.781
	2.09771	742.791	766.983	746.245
	2.09904	740.476	762.578	741.482
	2.10037	737.87	757.906	736.519
	2.10171	735.001	752.99	731.37
	2.10304	731.885	747.854	726.038
	2.10437	728.524	742.513	720.513
	2.10571	724.904	736.967	714.794
	2.10704	721.016	731.213	708.886
	2.10837	716.856	725.251	702.799
	2.10971	712.436	719.086	696.552
	2.11104	707.777	712.735	690.161
	2.11237	702.904	706.221	683.644
	2.11371	697.841	699.572	677.004
	2.11504	692.6	692.807	670.241
	2.11637	687.182	685.937	663.353
	2.11771	681.581	678.964	656.349
	2.11904	675.798	671.884	649.245
	2.12037	669.844	664.696	642.058
	2.12171	663.735	657.404	634.805
	2.12304	657.5	650.018	627.504
	2.12437	651.162	642.554	620.169
	2.12571	644.742	635.03	612.806
	2.12704	638.241	627.456	605.417
	2.12837	631.653	619.841	598.007
	2.12971	624.972	612.19	590.582
	2.13104	618.193	604.504	583.147
	2.13237	611.322	596.788	575.706
	2.13371	604.372	589.051	568.265
	2.13504	597.367	581.309	560.831
	2.13637	590.326	573.575	553.406
	2.13771	583.262	565.861	545.992
	2.13904	576.176	558.177	538.594
	2.14037	569.06	550.519	531.218
	2.14171	561.912	542.884	523.868
	2.14304	554.731	535.27	516.548
	2.14437	547.527	527.676	509.261
	2.14571	540.311	520.106	502.013
	2.14704	533.102	512.565	494.813
	2.14837	525.914	505.062	487.667
	2.14971	518.758	497.606	480.577
	2.15104	511.639	490.201	473.551
	2.15237	504.552	482.852	466.586
	2.15371	497.494	475.559	459.684
	2.15504	490.465	468.325	452.839
	2.15637	483.474	461.151	446.05
	2.15771	476.527	454.042	439.316
	2.15904	469.632	447.005	432.64
	2.16037	462.796	440.041	426.026
	2.16171	456.023	433.156	419.481
	2.16304	449.314	426.358	413.007
	2.16437	442.665	419.652	406.606
	2.16571	436.071	413.034	400.275
	2.16704	429.532	406.498	394.01
	2.16837	423.046	400.038	387.812
	2.16971	416.614	393.647	381.684
	2.17104	410.238	387.318	375.635
	2.17237	403.924	381.05	369.672
	2.17371	397.678	374.848	363.801
	2.17504	391.504	368.718	358.026
	2.17637	385.4	362.668	352.336
	2.17771	379.366	356.703	346.722
	2.17904	373.403	350.826	341.171
	2.18037	367.51	345.036	335.679
	2.18171	361.687	339.328	330.243
	2.18304	355.935	333.697	324.867
	2.18437	350.257	328.142	319.558
	2.18571	344.657	322.663	314.321
	2.18704	339.133	317.265	309.157
	2.18837	333.684	311.952	304.066
	2.18971	328.306	306.722	299.043
	2.19104	322.995	301.572	294.087
	2.19237	317.745	296.5	289.197
	2.19371	312.555	291.499	284.378
	2.19504	307.426	286.562	279.638
	2.19637	302.366	281.689	274.985
	2.19771	297.379	276.881	270.415
	2.19904	292.468	272.143	265.926
	2.20037	287.633	267.479	261.511
	2.20171	282.872	262.887	257.16
	2.20304	278.18	258.366	252.864
	2.20437	273.551	253.91	248.622
	2.20571	268.983	249.516	244.44
	2.20704	264.479	245.183	240.322
	2.20837	260.042	240.912	236.272
	2.20971	255.677	236.715	232.291
	2.21104	251.381	232.595	228.375
	2.21237	247.153	228.554	224.517
	2.21371	242.986	224.589	220.711
	2.21504	238.875	220.695	216.952
	2.21637	234.813	216.863	213.246
	2.21771	230.799	213.087	209.6
	2.21904	226.838	209.36	206.016
	2.22037	222.933	205.682	202.495
	2.22171	219.089	202.061	199.035
	2.22304	215.303	198.499	195.629
	2.22437	211.574	194.998	192.27
	2.22571	207.901	191.555	188.952
	2.22704	204.282	188.168	185.674
	2.22837	200.714	184.835	182.439
	2.22971	197.201	181.552	179.255
	2.23104	193.75	178.32	176.123
	2.23237	190.363	175.14	173.046
	2.23371	187.035	172.02	170.021
	2.23504	183.763	168.959	167.045
	2.23637	180.539	165.955	164.114
	2.23771	177.358	163.004	161.227
	2.23904	174.213	160.101	158.386
	2.24037	171.103	157.241	155.597
	2.24171	168.034	154.421	152.863
	2.24304	165.012	151.642	150.181
	2.24437	162.041	148.908	147.55
	2.24571	159.121	146.223	144.963
	2.24704	156.251	143.589	142.415
	2.24837	153.427	141.004	139.9
	2.24971	150.645	138.466	137.414
	2.25104	147.904	135.971	134.961
	2.25237	145.205	133.516	132.544
	2.25371	142.554	131.099	130.17
	2.25504	139.956	128.724	127.837
	2.25637	137.41	126.391	125.543
	2.25771	134.911	124.103	123.287
	2.25904	132.457	121.858	121.067
	2.26037	130.04	119.657	118.882
	2.26171	127.654	117.493	116.73
	2.26304	125.299	115.363	114.617
	2.26437	122.976	113.264	112.544
	2.26571	120.695	111.197	110.516
	2.26704	118.456	109.164	108.529
	2.26837	116.262	107.166	106.578
	2.26971	114.109	105.207	104.66
	2.27104	111.994	103.284	102.772
	2.27237	109.915	101.4	100.913
	2.27371	107.869	99.5488	99.0829
	2.27504	105.857	97.7287	97.2857
	2.27637	103.883	95.9387	95.5248
	2.27771	101.952	94.1806	93.801
	2.27904	100.062	92.4563	92.1135
	2.28037	98.2084	90.7679	90.4594
	2.28171	96.3869	89.1151	88.8371
	2.28304	94.5921	87.4987	87.244
	2.28437	92.8192	85.916	85.6786
	2.28571	91.0649	84.3625	84.1408
	2.28704	89.3292	82.8342	82.6302
	2.28837	87.6188	81.3294	81.1472
	2.28971	85.9408	79.8507	79.6919
	2.29104	84.2996	78.4001	78.2647
	2.29237	82.696	76.9806	76.8647
	2.29371	81.13	75.594	75.4914
	2.29504	79.5999	74.2402	74.1444
	2.29637	78.1016	72.917	72.8226
	2.29771	76.6316	71.6209	71.526
	2.29904	75.1882	70.3487	70.2538
	2.30037	73.7743	69.0994	69.0069
	2.30171	72.3901	67.8744	67.7848
	2.30304	71.0359	66.6733	66.5875
	2.30437	69.7093	65.4979	65.413
	2.30571	68.4075	64.3477	64.2605
	2.30704	67.1277	63.2234	63.1304
	2.30837	65.8688	62.1219	62.0217
	2.30971	64.631	61.0404	60.9355
	2.31104	63.4151	59.979	59.8717
	2.31237	62.2244	58.938	58.8307
	2.31371	61.06	57.919	57.8113
	2.31504	59.9213	56.922	56.8113
	2.31637	58.8064	55.9459	55.8295
	2.31771	57.7135	54.9917	54.8639
	2.31904	56.6416	54.0585	53.915
	2.32037	55.5916	53.1444	52.9847
	2.32171	54.5635	52.2494	52.074
	2.32304	53.5583	51.373	51.1837
	2.32437	52.577	50.5157	50.3139
	2.32571	51.6176	49.6764	49.4647
	2.32704	50.6792	48.8563	48.6341
	2.32837	49.7594	48.0542	47.8206
	2.32971	48.8548	47.2693	47.0228
	2.33104	47.965	46.5007	46.2403
	2.33237	47.09	45.7463	45.4745
	2.33371	46.2317	45.0072	44.7259
	2.33504	45.3911	44.2839	43.9944
	2.33637	44.569	43.5762	43.2777
	2.33771	43.7636	42.8843	42.5758
	2.33904	42.974	42.2082	41.8878
	2.34037	42.1996	41.5473	41.2116
	2.34171	41.4395	40.9002	40.5474
	2.34304	40.6952	40.2665	39.896
	2.34437	39.9675	39.6452	39.2585
	2.34571	39.2575	39.0363	38.6357
	2.34704	38.5666	38.4388	38.0268
	2.34837	37.8938	37.8542	37.4317
	2.34971	37.2362	37.2834	36.8509
	2.35104	36.5925	36.725	36.283
	2.35237	35.9612	36.1791	35.727
	2.35371	35.3413	35.6455	35.1834
	2.35504	34.7328	35.1238	34.6527
	2.35637	34.1363	34.6117	34.1344
	2.35771	33.5522	34.1096	33.627
	2.35904	32.9828	33.617	33.1307
	2.36037	32.4273	33.1349	32.6448
	2.36171	31.8861	32.6643	32.1698
	2.36304	31.3573	32.2046	31.7049
	2.36437	30.8404	31.7569	31.2491
	2.36571	30.3354	31.3206	30.8032
	2.36704	29.8414	30.8943	30.3669
	2.36837	29.3584	30.4761	29.9406
	2.36971	28.8873	30.0665	29.5224
	2.37104	28.4276	29.665	29.1133
	2.37237	27.9794	29.2721	28.7132
	2.37371	27.5412	28.8873	28.3208
	2.37504	27.1125	28.5106	27.9365
	2.37637	26.6924	28.142	27.5602
	2.37771	26.2809	27.7801	27.1926
	2.37904	25.8779	27.4243	26.8331
	2.38037	25.4831	27.0753	26.4811
	2.38171	25.0974	26.7334	26.1369
	2.38304	24.7202	26.3982	25.7997
	2.38437	24.3521	26.0706	25.4693
	2.38571	23.9925	25.7497	25.1455
	2.38704	23.6402	25.4359	24.8284
	2.38837	23.2959	25.1279	24.5175
	2.38971	22.9597	24.826	24.2143
	2.39104	22.6312	24.5299	23.9186
	2.39237	22.3093	24.2395	23.6301
	2.39371	21.9946	23.9558	23.3483
	2.39504	21.6875	23.6778	23.0737
	2.39637	21.388	23.4051	22.8052
	2.39771	21.0943	23.1376	22.542
	2.39904	20.8058	22.8744	22.284
	2.40037	20.5231	22.6164	22.0318
	2.40171	20.2456	22.3632	21.7853
	2.40304	19.9728	22.1152	21.5435
	2.40437	19.7058	21.8716	21.307
	2.40571	19.444	21.6336	21.0757
	2.40704	19.1889	21.4009	20.8507
	2.40837	18.94	21.173	20.6299
	2.40971	18.6958	20.9498	20.4139
	2.41104	18.4569	20.7314	20.2026
	2.41237	18.2219	20.5188	19.9962
	2.41371	17.9915	20.3099	19.7945
	2.41504	17.766	20.1058	19.5961
	2.41637	17.5448	19.906	19.4025
	2.41771	17.3278	19.711	19.2127
	2.41904	17.1166	19.5203	19.0268
	2.42037	16.9106	19.3329	18.8451
	2.42171	16.7093	19.1498	18.6677
	2.42304	16.5114	18.971	18.4951
	2.42437	16.3174	18.7969	18.3272
	2.42571	16.1262	18.6262	18.1642
	2.42704	15.9392	18.4598	18.0063
	2.42837	15.7566	18.2981	17.8528
	2.42971	15.5773	18.1408	17.7031
	2.43104	15.4018	17.9863	17.5557
	2.43237	15.2302	17.8356	17.4112
	2.43371	15.0633	17.6892	17.2691
	2.43504	14.8997	17.5471	17.1294
	2.43637	14.739	17.4089	16.9926
	2.43771	14.5817	17.2744	16.8595
	2.43904	14.4277	17.1442	16.7308
	2.44037	14.2779	17.0174	16.6068
	2.44171	14.132	16.8943	16.4866
	2.44304	13.989	16.7751	16.3712
	2.44437	13.8483	16.6602	16.2592
	2.44571	13.71	16.5505	16.15
	2.44704	13.5737	16.4447	16.0441
	2.44837	13.4397	16.3422	15.9411
	2.44971	13.3066	16.242	15.841
	2.45104	13.176	16.1452	15.7428
	2.45237	13.0477	16.0518	15.6484
	2.45371	12.9232	15.9617	15.5582
	2.45504	12.8017	15.8753	15.4715
	2.45637	12.6824	15.7938	15.388
	2.45771	12.5666	15.7151	15.3074
	2.45904	12.4536	15.6403	15.2302
	2.46037	12.3424	15.5683	15.1558
	2.46171	12.2333	15.4991	15.0843
	2.46304	12.126	15.4333	15.0151
	2.46437	12.0206	15.3699	14.9488
	2.46571	11.9176	15.3108	14.8849
	2.46704	11.8165	15.2545	14.8239
	2.46837	11.7173	15.2016	14.7648
	2.46971	11.62	15.151	14.7076
	2.47104	11.5252	15.1038	14.6523
	2.47237	11.4322	15.0604	14.5989
	2.47371	11.3421	15.0204	14.5478
	2.47504	11.2538	14.9832	14.4987
	2.47637	11.1675	14.9484	14.4515
	2.47771	11.0831	14.9169	14.4062
	2.47904	11.0006	14.8888	14.3638
	2.48037	10.9191	14.864	14.3223
	2.48171	10.8395	14.842	14.2822
	2.48304	10.7613	14.8225	14.2431
	2.48437	10.6854	14.8053	14.2059
	2.48571	10.6111	14.7915	14.1707
	2.48704	10.5381	14.78	14.1363
	2.48837	10.4661	14.7705	14.1029
	2.48971	10.395	14.7624	14.071
	2.49104	10.3245	14.7562	14.0395
	2.49237	10.2549	14.7524	14.0081
	2.49371	10.1872	14.751	13.9766
	2.49504	10.1209	14.751	13.9456
	2.49637	10.056	14.7524	13.9146
	2.49771	9.99212	14.7557	13.8826
	2.49904	9.93013	14.761	13.8507
	2.50037	9.86958	14.7672	13.8183
	2.50171	9.80902	14.7748	13.7844
	2.50304	9.74894	14.7829	13.7496
	2.50437	9.68933	14.791	13.7129
	2.50571	9.6302	14.8001	13.6752
	2.50704	9.57012	14.8091	13.6352
	2.50837	9.50909	14.8182	13.5927
	2.50971	9.44614	14.8258	13.5469
	2.51104	9.38273	14.8315	13.4969
	2.51237	9.31835	14.8363	13.442
	2.51371	9.25207	14.8401	13.381
	2.51504	9.18436	14.842	13.3138
	2.51637	9.11426	14.8416	13.2399
	2.51771	9.04226	14.8392	13.1583
	2.51904	8.96883	14.8339	13.0682
	2.52037	8.89254	14.8244	12.9695
	2.52171	8.8129	14.8091	12.8622
	2.52304	8.72946	14.7886	12.7454
	2.52437	8.64315	14.7634	12.6181
	2.52571	8.5516	14.7319	12.4793
	2.52704	8.4548	14.6947	12.3282
	2.52837	8.35133	14.6523	12.1655
	2.52971	8.24261	14.6031	11.9906
	2.53104	8.12912	14.5478	11.8017
	2.53237	8.00943	14.4849	11.5986
	2.53371	7.8826	14.4153	11.3816
	2.53504	7.74956	14.3375	11.1513
	2.53637	7.60984	14.2512	10.9067
	2.53771	7.4625	14.1563	10.6468
	2.53904	7.30753	14.0519	10.3712
	2.54037	7.14636	13.9375	10.0808
	2.54171	6.97899	13.813	9.77468
	2.54304	6.80494	13.6795	9.45282
	2.54437	6.62375	13.5369	9.11426
	2.54571	6.43539	13.3858	8.75998
	2.54704	6.23989	13.2251	8.39043
	2.54837	6.03676	13.0553	8.00562
	2.54971	5.82647	12.8779	7.60555
	2.55104	5.60951	12.691	7.1907
	2.55237	5.38731	12.4955	6.76203
	2.55371	5.15938	12.2905	6.32048
	2.55504	4.92525	12.0778	5.86605
	2.55637	4.68588	11.8585	5.40113
	2.55771	4.44126	11.6329	4.92668
	2.55904	4.19378	11.4021	4.4446
	2.56037	3.94201	11.1661	3.95441
	2.56171	3.68738	10.9253	3.45707
	2.56304	3.43084	10.6812	2.95401
	2.56437	3.1724	10.4342	2.44474
	2.56571	2.913	10.1843	1.92928
	2.56704	2.65217	9.93156	1.40762
	2.56837	2.39181	9.67693	0.881672
	2.56971	2.13242	9.42183	0.352859
	2.57104	1.87492	9.16576	-0.17881
	2.57237	1.61934	8.9097	-0.70953
	2.57371	1.36614	8.65412	-1.23787
	2.57504	1.11723	8.39996	-1.76239
	2.57637	0.872135	8.14962	-2.28214
	2.57771	0.630856	7.90262	-2.79522
	2.57904	0.392914	7.65896	-3.30114
	2.58037	0.160217	7.4172	-3.79992
	2.58171	-0.06676	7.17926	-4.29201
	2.58304	-0.28849	6.94561	-4.77552
	2.58437	-0.50449	6.71625	-5.24998
	2.58571	-0.71383	6.49071	-5.71489
	2.58704	-0.91648	6.27088	-6.16932
	2.58837	-1.11151	6.05726	-6.61325
	2.58971	-1.2989	5.85079	-7.04527
	2.59104	-1.47867	5.65052	-7.46536
	2.59237	-1.65033	5.45788	-7.87401
	2.59371	-1.81293	5.27334	-8.26979
	2.59504	-1.96552	5.09644	-8.65173
	2.59637	-2.10905	4.92764	-9.01937
	2.59771	-2.24447	4.76599	-9.37128
	2.59904	-2.37226	4.61197	-9.70745
	2.60037	-2.491	4.46463	-10.026
	2.60171	-2.60258	4.32444	-10.3259
	2.60304	-2.70605	4.19235	-10.6077
	2.60437	-2.8019	4.06837	-10.8719
	2.60571	-2.88916	3.95155	-11.1194
	2.60704	-2.96831	3.84235	-11.3492
	2.60837	-3.03888	3.74031	-11.5614
	2.60971	-3.10183	3.64637	-11.7569
	2.61104	-3.15619	3.55911	-11.9348
	2.61237	-3.20339	3.479	-12.094
	2.61371	-3.24345	3.40652	-12.2347
	2.61504	-3.27492	3.34215	-12.3577
	2.61637	-3.29924	3.28588	-12.464
	2.61771	-3.31688	3.23582	-12.5551
	2.61904	-3.32785	3.19243	-12.6305
	2.62037	-3.33166	3.15571	-12.6905
	2.62171	-3.3288	3.12471	-12.7363
	2.62304	-3.31926	3.09897	-12.7678
	2.62437	-3.30353	3.07894	-12.784
	2.62571	-3.28159	3.06463	-12.7845
	2.62704	-3.25394	3.05557	-12.7687
	2.62837	-3.22056	3.05271	-12.7387
	2.62971	-3.18146	3.05605	-12.6944
	2.63104	-3.13711	3.06463	-12.6371
	2.63237	-3.08704	3.07751	-12.567
	2.63371	-3.03173	3.09515	-12.4841
	2.63504	-2.97165	3.11756	-12.3892
	2.63637	-2.90775	3.14522	-12.2828
	2.63771	-2.84004	3.17669	-12.1655
	2.63904	-2.76756	3.21197	-12.0363
	2.64037	-2.69032	3.25155	-11.8971
	2.64171	-2.60925	3.2959	-11.7493
	2.64304	-2.52438	3.34358	-11.5929
	2.64437	-2.43616	3.39317	-11.4284
	2.64571	-2.34461	3.4461	-11.2557
	2.64704	-2.24972	3.50189	-11.0755
	2.64837	-2.15244	3.56102	-10.8871
	2.64971	-2.05231	3.62349	-10.6902
	2.65104	-1.94931	3.68881	-10.4856
	2.65237	-1.8425	3.757	-10.2749
	2.65371	-1.73283	3.82757	-10.0589
	2.65504	-1.62077	3.90005	-9.83667
	2.65637	-1.50728	3.97492	-9.6097
	2.65771	-1.39141	4.05121	-9.37843
	2.65904	-1.27363	4.12941	-9.14335
	2.66037	-1.1549	4.20952	-8.90398
	2.66171	-1.03569	4.29153	-8.66079
	2.66304	-0.916	4.37594	-8.41427
[truncated: 2,503 more rows]
