# Supplementary material for: Structures of ferroportin in complex with its specific inhibitor vamifeport
Source: eLife journal article supplement (doi:10.7554/elife.83053), 2023-02-28
Supplement: fig5-data1 [file Figure5.xlsx]

## Sheet: Figure 5B_WT
	WT
	Hep25 (uM)	Fluorescence polarization			minus background			fractional saturation
	16	230.908	246.623	238.351	-6.09161	9.62293	1.35119	-0.0627124	0.0990668	0.0139103
	4	248.728	251.251	247.873	11.7283	14.2507	10.873	0.120741	0.146709	0.111936
	1	267.721	265.676	270.457	30.7211	28.6758	33.4573	0.316269	0.295213	0.344438
	0.25	292.074	294.459	292.891	55.0739	57.4587	55.8906	0.566978	0.59153	0.575387
	0.0625	309.096	311.207	313.132	72.0963	74.2068	76.1318	0.742222	0.763949	0.783767
	0.015625	317.585	316.364	316.366	80.585	79.364	79.3658	0.829612	0.817042	0.81706
	0.00390625	317.122	325.436	321.749	80.1217	88.4364	84.7493	0.824843	0.910442	0.872483
	0.000976562	310.161	309.37	319.724	73.1614	72.3704	82.7244	0.753187	0.745044	0.851637
				Average saturation value		78.2064			0.805125
									saturation at 400uM FPN with KD 100nM
	vamifeport (uM)	Fluorescence polarization			minus background			fractional saturation
	12	232.581	235.621	236.759	-4.41906	-1.37908	-0.24094	-0.0454937	-0.0141975	-0.00248045
	3	238.793	237.793	242.801	1.79318	0.79345	5.80084	0.0184605	0.00816847	0.0597189
	0.75	239.409	242.197	239.591	2.40892	5.19733	2.59132	0.0247995	0.0535059	0.0266773
	0.1875	257.606	264.061	264.727	20.6065	27.0609	27.727	0.212141	0.278589	0.285446
	0.046875	304.205	306.059	302.293	67.2049	69.0593	65.2929	0.691865	0.710957	0.672182
	0.0117188	311.556	316.82	316.46	74.5556	79.8196	79.4603	0.76754	0.821733	0.818034
	0.00292969	317.439	314.107	317.951	80.4391	77.1073	80.9506	0.82811	0.79381	0.833376
	0.000732422	314.255	305.236	309.925	77.2554	68.2358	72.9252	0.795334	0.702479	0.750756
		parallel Fluorescence
	Hep25 (uM)	47630	50065	49074
		49833	50147	50235
		48413	51220	51592
		52026	52245	52684
		52788	53452	53388
		53936	54146	54281
		53595	54437	54084
		52715	53239	54306
	vamifeport (uM)	parallel Fluorescence
		47153	49486	47029
		49867	50195	49351
		50408	49850	49319
		50840	51939	50990
		53147	53617	52849
		53901	54596	53809
		55148	54931	54662
		54422	54258	54897
		perpendicular Fluorescence
	Hep25 (uM)	29760	30256	30183
		29981	30008	30278
		27965	29717	29626
		28505	28476	28814
		27860	28079	27926
		27935	28120	28190
		27787	27705	27753
		27756	28081	27993
	vamifeport (uM)	perpendicular Fluorescence
		29358	30613	29023
		30642	30909	30068
		30934	30411	30254
		30012	30239	29644
		28354	28488	28314
		28293	28325	27939
		28572	28671	28288
		28396	28881	28920

## Sheet: Figure 5C_R466A_mut12
	R466A, mut12
	Hep25 (uM)	Fluorescence polarization			minus background			fractional saturation
	16	247.877	248.26	240.899	11.8768	12.2597	4.89931	0.163188	0.168449	0.067317
	4	245.78	244.597	245.328	9.7801	8.59672	9.32757	0.134379	0.11812	0.128162
	1	266.108	263.706	267.253	30.1075	27.706	31.2534	0.41368	0.380683	0.429424
	0.25	280.556	279.159	275.628	44.5561	43.1588	39.6283	0.612204	0.593005	0.544496
	0.0625	281.616	282.802	282.287	45.616	46.8019	46.2867	0.626768	0.643062	0.635983
	0.015625	283.329	285.509	290.369	47.3292	49.5089	54.3689	0.650307	0.680257	0.747034
	0.00390625	281.76	283.03	276.547	45.7605	47.03	40.5473	0.628753	0.646196	0.557123
	0.000976562	277.407	277.196	281.81	41.4068	41.1961	45.8096	0.568933	0.566037	0.629428
				Average saturation value		44.6138			0.613
									saturation at 400uM FPN with KD 501nM
	vamifeport (uM)	Fluorescence polarization			minus background			fractional saturation
	12	231.533	241.011	236.63	-4.46717	5.01062	0.630251	-0.0613793	0.0688463	0.0086597
	3	235.026	233.369	235.611	-0.974409	-2.63131	-0.389492	-0.0133885	-0.0361544	-0.00535165
	0.75	245.538	243.826	239.636	9.53794	7.82623	3.63628	0.131052	0.107533	0.0499627
	0.1875	252.592	259.658	262.786	16.5921	23.6575	26.7864	0.227977	0.325057	0.368048
	0.046875	277.767	277.708	278.452	41.7671	41.7081	42.4523	0.573884	0.573072	0.583298
	0.0117188	290.838	285.464	283.52	54.8384	49.4639	47.5203	0.753484	0.679638	0.652933
	0.00292969	284.876	274.831	284.208	48.8763	38.8307	48.2083	0.671565	0.533536	0.662386
	0.000732422	280.876	279.045	285.779	44.876	43.0454	49.7789	0.6166	0.591448	0.683967
		parallel Fluorescence
	Hep25 (uM)	48120	45456	44127
		50408	50675	50107
		51780	51932	51479
		52045	52308	51647
		53230	53768	53631
		54460	53661	53880
		54023	54455	49853
		49161	49340	50461
	vamifeport (uM)	parallel Fluorescence
		46523	48284	46467
		49104	48834	47668
		49966	49763	49146
		50740	51423	50454
		53311	52961	51909
		53442	53179	53320
		53995	48652	49155
		53515	49524	53986
		perpendicular Fluorescence
	Hep25 (uM)	29003	27375	26994
		30518	30757	30365
		30014	30258	29766
		29240	29477	29328
		29837	30061	30018
		30413	29825	29631
		30272	30430	28253
		27809	27923	28273
	vamifeport (uM)	perpendicular Fluorescence
		29030	29530	28684
		30415	30354	29489
		30266	30253	30145
		30276	30223	29455
		30133	29939	29297
		29360	29560	29764
		30052	27675	27398
		30045	27915	29988

## Sheet: Figure 5D_L469A_mut13
	L469A, Mut13
	Hep25 (uM)	Fluorescence polarization			minus background			fractional saturation
	16	244.004	248.584	250.272	3.00406	7.58436	9.27242	0.0336224	0.0848865	0.10378
	4	252.556	256.221	254.697	11.5558	15.221	13.6974	0.129336	0.170358	0.153306
	1	274.107	271.871	273.27	33.1066	30.8714	32.2696	0.37054	0.345522	0.361171
	0.25	305.496	302.028	306.181	64.4958	61.0277	65.1808	0.721857	0.683041	0.729524
	0.0625	320.291	325.151	314.718	79.2913	84.1507	73.7185	0.887453	0.94184	0.82508
	0.015625	320.424	323.185	326.925	79.4243	82.1848	85.9252	0.888942	0.919837	0.961701
	0.00390625	319.737	323.043	320.368	78.7367	82.0431	79.3678	0.881246	0.918251	0.888309
	0.000976562	319.868	321.782	315.956	78.8684	80.7822	74.9565	0.882719	0.90414	0.838936
				Average saturation value		77.979			0.873
									saturation at 400uM FPN with KD 57nM
	vamifeport (uM)	Fluorescence polarization			minus background			fractional saturation
	12	239.079	236.875	244.611	-1.92084	-4.12459	3.61063	-0.0214987	-0.0461637	0.0404113
	3	245.563	246.902	248.106	4.56258	5.90172	7.1064	0.0510657	0.0660538	0.079537
	0.75	256.985	261.577	257.993	15.9853	20.5769	16.9929	0.178912	0.230303	0.19019
	0.1875	285.931	291.16	293.472	44.9308	50.1597	52.4719	0.50288	0.561403	0.587281
	0.046875	312.591	309.684	311.053	71.5913	68.6837	70.0526	0.801271	0.768729	0.78405
	0.0117188	325.252	321.874	328.834	84.2524	80.874	87.8344	0.942979	0.905167	0.98307
	0.00292969	320.973	319.997	321.664	79.973	78.9972	80.664	0.895082	0.884161	0.902816
	0.000732422	311.488	312.425	320.446	70.4882	71.4254	79.4461	0.788925	0.799415	0.889186
		parallel Fluorescence
	Hep25 (uM)	47771	49502	47616
		49682	49953	48713
		50131	50389	49732
		51618	51947	51585
		53114	54090	52429
		54144	54934	53907
		54744	55886	54924
		54762	54926	55157
	vamifeport (uM)	parallel Fluorescence
		47015	48864	46101
		49683	49954	48610
		50588	50523	49892
		52601	52791	51724
		53937	54511	53272
		55595	56485	55332
		56072	57012	55950
		55573	56599	56354
		perpendicular Fluorescence
	Hep25 (uM)	29031	29791	28553
		29647	29576	28936
		28561	28847	28385
		27460	27847	27401
		27344	27546	27328
		27866	28099	27344
		28218	28595	28271
		28219	28183	28671
	vamifeport (uM)	perpendicular Fluorescence
		28872	30148	27980
		30093	30171	29284
		29903	29572	29428
		29209	28982	28253
		28247	28732	27994
		28306	28977	27947
		28823	29370	28716
		29175	29652	29002

## Sheet: Figure 5E_L469S_mut14
	L469S, Mut14
	Hep25 (uM)	Fluorescence polarization			minus background			fractional saturation
	16	230.162	234.33	230.265	4.16248	8.33005	4.26466	0.0449727	0.0900002	0.0460766
	4	243.714	239.894	242.819	17.7145	13.8939	16.8192	0.191392	0.150114	0.181719
	1	259.838	262.377	256.676	33.8375	36.3766	30.6758	0.36559	0.393023	0.33143
	0.25	286.281	283.409	285.628	60.281	57.4089	59.6277	0.651294	0.620262	0.644234
	0.0625	300.218	304.638	298.829	74.2179	78.6378	72.8291	0.801872	0.849625	0.786867
	0.015625	303.452	302.47	307.314	77.4519	76.4699	81.3143	0.836813	0.826203	0.878544
	0.00390625	301.285	300.522	299.141	75.2852	74.5225	73.1412	0.813403	0.805162	0.790239
	0.000976562	296.448	289.842	295.664	70.4478	63.8418	69.6637	0.761139	0.689765	0.752667
				Average saturation value		74.5862			0.806
									saturation at 400uM FPN with KD 94nM
	vamifeport (uM)	Fluorescence polarization			minus background			fractional saturation
	12	227.793	225.182	222.136	1.79348	-0.817685	-3.86434	0.0193773	-0.00883451	-0.0417514
	3	232.87	226.475	236.334	6.8698	0.474981	10.3342	0.0742233	0.00513184	0.111654
	0.75	241.995	246.237	246.355	15.9947	20.2371	20.3552	0.172811	0.218648	0.219924
	0.1875	269.914	272.925	272.952	43.9143	46.9251	46.9521	0.474463	0.506992	0.507285
	0.046875	300.393	302.133	294.348	74.3931	76.133	68.3484	0.803764	0.822563	0.738456
	0.0117188	305.938	305.587	306.335	79.938	79.5871	80.3349	0.863673	0.859882	0.867961
	0.00292969	303.709	302.457	308.336	77.7089	76.4571	82.3361	0.83959	0.826065	0.889584
	0.000732422	303.893	300.517	305.22	77.8933	74.5172	79.2196	0.841581	0.805105	0.855912
		parallel Fluorescence
	Hep25 (uM)	45540	48050	45764
		48008	48385	47682
		49705	50259	48967
		51877	51534	50880
		52508	53997	52913
		53639	52048	53477
		54220	54514	54232
		54819	54777	55113
	vamifeport (uM)	parallel Fluorescence
		44529	45529	43142
		46412	45983	45800
		48231	48106	47703
		49700	50889	48889
		52439	52683	51141
		53597	54050	53337
		53675	54332	54241
		54875	54822	54613
		perpendicular Fluorescence
	Hep25 (uM)	28499	29806	28633
		29193	29662	29050
		29202	29367	28964
		28785	28774	28272
		28260	28780	28565
		28664	27874	28335
		29113	29320	29257
		29749	30159	29960
	vamifeport (uM)	perpendicular Fluorescence
		28006	28793	27459
		28879	29001	28290
		29436	29096	28845
		28573	29067	27923
		28212	28235	27881
		28485	28748	28322
		28667	29098	28675
		29296	29486	29071

## Sheet: Figure 5F_W470S_mut16
	L469S, Mut14
	Hep25 (uM)	Fluorescence polarization			minus background			fractional saturation
	16	199.603	197.555	199.382	0.602668	-1.44507	0.382419	0.00451645	-0.0108295	0.00286588
	4	209.77	199.266	211.123	10.7695	0.265633	12.1234	0.0807077	0.00199068	0.0908538
	1	230.394	227.984	235.884	31.3942	28.9843	36.884	0.235271	0.217211	0.276412
	0.25	255.926	267.659	260.637	56.9256	68.6592	61.6375	0.426606	0.514538	0.461917
	0.0625	283.051	273.95	278.207	84.051	74.9497	79.2069	0.629886	0.56168	0.593584
	0.015625	280.903	276.549	284.975	81.9031	77.5493	85.975	0.613789	0.581162	0.644304
	0.00390625	279.782	283.664	282.151	80.7817	84.6639	83.1505	0.605385	0.634479	0.623137
	0.000976562	284.339	277.062	287.104	85.3389	78.0618	88.1035	0.639537	0.585002	0.660256
				Average saturation value		84.5912			0.634
									saturation at 400uM FPN with KD 227nM
	vamifeport (uM)	Fluorescence polarization			minus background			fractional saturation
	12	199.505	191.274	204.592	0.505203	-7.72554	5.59151	0.00378603	-0.0578959	0.0419033
	3	202.252	197.563	199.848	3.25221	-1.43685	0.847724	0.0243724	-0.0107679	0.00635292
	0.75	208.26	211.54	211.512	9.25968	12.5397	12.5119	0.0693929	0.0939739	0.0937656
	0.1875	242.737	242.872	250.342	43.737	43.8716	51.3423	0.327769	0.328778	0.384764
	0.046875	279.847	283.332	281.633	80.8475	84.3317	82.6332	0.605878	0.631989	0.61926
	0.0117188	280.989	280.496	286.4	81.9893	81.4963	87.3998	0.614435	0.610741	0.654982
	0.00292969	284.928	285.359	292.557	85.928	86.359	93.5571	0.643952	0.647182	0.701125
	0.000732422	282.736	279.817	283.598	83.7361	80.8169	84.5976	0.627526	0.605649	0.633982
		parallel Fluorescence
	Hep25 (uM)	42268	43003	42337
		43539	43766	44358
		45930	46163	46895
		47079	48706	48174
		49758	50307	50470
		51060	51496	52019
		51819	52903	52013
		52559	52765	53604
	vamifeport (uM)	parallel Fluorescence
		41212	42105	40717
		43025	43738	42549
		45114	45649	43927
		47439	48449	46574
		51016	52093	49439
		52053	53042	50798
		52524	54273	51595
		53408	53975	51935
		perpendicular Fluorescence
	Hep25 (uM)	28202	28815	28261
		28440	29222	28893
		28729	29022	28994
		27892	28138	28254
		27804	28671	28500
		28665	29184	28946
		29162	29522	29121
		29287	29870	29690
	vamifeport (uM)	perpendicular Fluorescence
		27503	28584	26886
		28549	29307	28375
		29562	29708	28589
		28907	29514	27924
		28706	29091	27711
		29217	29804	28179
		29230	30175	28239
		29864	30373	28986
