# Supplementary material for: Structures of ferroportin in complex with its specific inhibitor vamifeport
Source: eLife journal article supplement (doi:10.7554/elife.83053), 2023-02-28
Supplement: fig5-figsupp1-data1 [file Figure5-supplement1.xlsx]

## Sheet: Figure 5-suppl1
	WT			neg (untransfected cells)			H43A			Y64A			Y64S			V68A			V68S			L314A			L314S			L317A			L317S			L318A			L318S			R466A			L469A			L469S			W470A
	volume (ml)	A280		volume (ml)	A280		volume (ml)	A280		volume (ml)	A280		volume (ml)	A280		volume (ml)	A280		volume (ml)	A280		volume (ml)	A280		volume (ml)	A280		volume (ml)	A280		volume (ml)	A280		volume (ml)	A280		volume (ml)	A280		volume (ml)	A280		volume (ml)	A280		volume (ml)	A280		volume (ml)
	0	7.05815		0	7.18717		0	7.09631		0	7.15294		0	7.15192		0	7.11082		0	7.08868		0	7.08716		0	7.06727		0	7.10688		0	7.06325		0	6.98655		0	7.06561		0	7.03077		0	7.03359		0	7.1084		0
	0.00108	7.06378		0.00108	7.17652		0.00144	7.09389		0.00108	7.15527		0.00108	7.15387		0.00108	7.10936		0.00108	7.0886		0.00108	7.08838		0.00108	7.06253		0.00108	7.10495		0.00108	7.06136		0.00108	6.99232		0.00108	7.06453		0.00108	7.02746		0.00108	7.03809		0.00108	7.10236		0.00108
	0.00216	7.07237		0.00216	7.16472		0.00288	7.09184		0.00216	7.15661		0.00216	7.15609		0.00216	7.10683		0.00216	7.0885		0.00216	7.08781		0.00216	7.05843		0.00216	7.10266		0.00216	7.06319		0.00216	6.99881		0.00216	7.06385		0.00216	7.02583		0.00216	7.0444		0.00216	7.09374		0.00216
	0.00324	7.08283		0.00324	7.15315		0.00432	7.09035		0.00324	7.15702		0.00324	7.15811		0.00324	7.10311		0.00324	7.08793		0.00324	7.08556		0.00324	7.05506		0.00324	7.10032		0.00324	7.06841		0.00324	7.00489		0.00324	7.06395		0.00324	7.02562		0.00324	7.05192		0.00324	7.08314		0.00324
	0.00432	7.09404		0.00432	7.14303		0.00576	7.0894		0.00432	7.15679		0.00432	7.15952		0.00432	7.09836		0.00432	7.08656		0.00432	7.08199		0.00432	7.0523		0.00432	7.09805		0.00432	7.07606		0.00432	7.00962		0.00432	7.06482		0.00432	7.02624		0.00432	7.05965		0.00432	7.07144		0.00432
	0.0054	7.10482		0.0054	7.13521		0.0072	7.08878		0.0054	7.15625		0.0054	7.16004		0.0054	7.09295		0.0054	7.08442		0.0054	7.07766		0.0054	7.04992		0.0054	7.0958		0.0054	7.08477		0.0054	7.01246		0.0054	7.06614		0.0054	7.02703		0.0054	7.06647		0.0054	7.05975		0.0054
	0.00648	7.11402		0.00648	7.13003		0.00864	7.08812		0.00648	7.15555		0.00648	7.15957		0.00648	7.08729		0.00648	7.08193		0.00648	7.07319		0.00648	7.0477		0.00648	7.09352		0.00648	7.09304		0.00648	7.01326		0.00648	7.06757		0.00648	7.02741		0.00648	7.07151		0.00648	7.04931		0.00648
	0.00756	7.1208		0.00756	7.12733		0.01008	7.0872		0.00756	7.15468		0.00756	7.15819		0.00756	7.08175		0.00756	7.0797		0.00756	7.06914		0.00756	7.04552		0.00756	7.09118		0.00756	7.09952		0.00756	7.01204		0.00756	7.06885		0.00756	7.02685		0.00756	7.07422		0.00756	7.04147		0.00756
	0.00864	7.12495		0.00864	7.12649		0.01152	7.08603		0.00864	7.1536		0.00864	7.15613		0.00864	7.07678		0.00864	7.0782		0.00864	7.06591		0.00864	7.04332		0.00864	7.08882		0.00864	7.10314		0.00864	7.00905		0.00864	7.06979		0.00864	7.02509		0.00864	7.07447		0.00864	7.03728		0.00864
	0.00972	7.12683		0.00972	7.12672		0.01296	7.08492		0.00972	7.15244		0.00972	7.15378		0.00972	7.073		0.00972	7.07768		0.00972	7.06375		0.00972	7.04107		0.00972	7.08657		0.00972	7.10335		0.00972	7.00481		0.00972	7.07027		0.00972	7.02231		0.00972	7.07249		0.00972	7.03719		0.00972
	0.0108	7.12702		0.0108	7.12737		0.0144	7.08432		0.0108	7.15148		0.0108	7.15156		0.0108	7.07111		0.0108	7.07828		0.0108	7.0627		0.0108	7.0388		0.0108	7.08458		0.0108	7.10016		0.0108	7.00007		0.0108	7.07018		0.0108	7.01919		0.0108	7.06885		0.0108	7.04106		0.0108
	0.01188	7.12596		0.01188	7.12808		0.01584	7.08468		0.01188	7.15083		0.01188	7.15004		0.01188	7.07154		0.01188	7.08024		0.01188	7.06266		0.01188	7.03686		0.01188	7.08292		0.01188	7.09426		0.01188	6.99565		0.01188	7.06953		0.01188	7.01665		0.01188	7.06439		0.01188	7.04827		0.01188
	0.01296	7.12383		0.01296	7.12873		0.01728	7.08635		0.01296	7.1503		0.01296	7.14986		0.01296	7.07432		0.01296	7.08379		0.01296	7.06329		0.01296	7.03585		0.01296	7.0816		0.01296	7.08693		0.01296	6.99221		0.01296	7.06835		0.01296	7.01544		0.01296	7.05995		0.01296	7.05814		0.01296
	0.01404	7.12077		0.01404	7.12937		0.01872	7.08962		0.01404	7.14968		0.01404	7.15141		0.01404	7.07896		0.01404	7.08903		0.01404	7.06416		0.01404	7.03633		0.01404	7.08057		0.01404	7.07964		0.01404	6.99003		0.01404	7.0667		0.01404	7.01588		0.01404	7.05616		0.01404	7.06984		0.01404
	0.01512	7.11702		0.01512	7.13023		0.02016	7.09468		0.01512	7.14888		0.01512	7.15469		0.01512	7.08476		0.01512	7.09576		0.01512	7.065		0.01512	7.03861		0.01512	7.07983		0.01512	7.07367		0.01512	6.98916		0.01512	7.06448		0.01512	7.01798		0.01512	7.05333		0.01512	7.08232		0.01512
	0.0162	7.11289		0.0162	7.13166		0.0216	7.10164		0.0162	7.14804		0.0162	7.15936		0.0162	7.09103		0.0162	7.10344		0.0162	7.06573		0.0162	7.0426		0.0162	7.07953		0.0162	7.06984		0.0162	6.98962		0.0162	7.06148		0.0162	7.02156		0.0162	7.05153		0.0162	7.09436		0.0162
	0.01728	7.10861		0.01728	7.134		0.02304	7.11027		0.01728	7.14725		0.01728	7.1651		0.01728	7.0971		0.01728	7.11139		0.01728	7.06646		0.01728	7.04801		0.01728	7.07976		0.01728	7.06841		0.01728	6.99153		0.01728	7.05746		0.01728	7.0263		0.01728	7.05062		0.01728	7.10489		0.01728
	0.01836	7.10412		0.01836	7.1374		0.02448	7.1199		0.01836	7.14644		0.01836	7.17179		0.01836	7.10222		0.01836	7.11891		0.01836	7.06727		0.01836	7.05456		0.01836	7.08045		0.01836	7.06912		0.01836	6.99495		0.01836	7.05237		0.01836	7.03158		0.01836	7.05028		0.01836	7.1133		0.01836
	0.01944	7.0994		0.01944	7.14171		0.02592	7.12939		0.01944	7.14541		0.01944	7.1793		0.01944	7.1057		0.01944	7.12538		0.01944	7.06819		0.01944	7.0619		0.01944	7.08138		0.01944	7.0713		0.01944	6.99974		0.01944	7.04647		0.01944	7.03642		0.01944	7.0501		0.01944	7.11953		0.01944
	0.02052	7.09467		0.02052	7.1466		0.02736	7.13749		0.02052	7.14406		0.02052	7.18715		0.02052	7.10695		0.02052	7.13018		0.02052	7.06918		0.02052	7.06943		0.02052	7.08235		0.02052	7.07407		0.02052	7.0055		0.02052	7.04022		0.02052	7.03988		0.02052	7.04969		0.02052	7.12376		0.02052
	0.0216	7.0905		0.0216	7.15164		0.0288	7.14295		0.0216	7.14241		0.0216	7.19449		0.0216	7.10579		0.0216	7.13267		0.0216	7.07024		0.0216	7.07624		0.0216	7.08334		0.0216	7.07662		0.0216	7.01172		0.0216	7.03422		0.0216	7.04138		0.0216	7.04899		0.0216	7.12612		0.0216
	0.02268	7.08749		0.02268	7.15635		0.03024	7.14479		0.02268	7.14049		0.02268	7.20034		0.02268	7.10244		0.02268	7.13249		0.02268	7.07148		0.02268	7.08148		0.02268	7.08453		0.02268	7.07846		0.02268	7.01801		0.02268	7.02906		0.02268	7.04089		0.02268	7.04822		0.02268	7.12665		0.02268
	0.02376	7.08601		0.02376	7.16023		0.03168	7.14238		0.02376	7.13825		0.02376	7.20385		0.02376	7.09742		0.02376	7.12981		0.02376	7.07293		0.02376	7.08463		0.02376	7.08618		0.02376	7.07951		0.02376	7.02406		0.02376	7.02529		0.02376	7.03871		0.02376	7.04772		0.02376	7.12553		0.02376
	0.02484	7.08624		0.02484	7.16277		0.03312	7.13559		0.02484	7.13557		0.02484	7.20446		0.02484	7.09145		0.02484	7.12532		0.02484	7.07455		0.02484	7.08556		0.02484	7.08841		0.02484	7.08015		0.02484	7.0295		0.02484	7.02346		0.02484	7.03509		0.02484	7.04776		0.02484	7.12314		0.02484
	0.02592	7.08827		0.02592	7.16373		0.03456	7.12504		0.02592	7.13242		0.02592	7.20184		0.02592	7.08538		0.02592	7.12004		0.02592	7.07628		0.02592	7.08432		0.02592	7.09121		0.02592	7.081		0.02592	7.03379		0.02592	7.02382		0.02592	7.03023		0.02592	7.04831		0.02592	7.11992		0.02592
	0.027	7.0923		0.027	7.16317		0.036	7.1122		0.027	7.12891		0.027	7.19586		0.027	7.08002		0.027	7.11485		0.027	7.07817		0.027	7.08091		0.027	7.09452		0.027	7.0828		0.027	7.03647		0.027	7.02625		0.027	7.02441		0.027	7.04919		0.027	7.11616		0.027
	0.02808	7.09829		0.02808	7.16147		0.03744	7.09922		0.02808	7.12528		0.02808	7.18682		0.02808	7.07601		0.02808	7.11026		0.02808	7.08037		0.02808	7.07539		0.02808	7.09839		0.02808	7.08608		0.02808	7.03736		0.02808	7.03021		0.02808	7.01823		0.02808	7.05018		0.02808	7.11199		0.02808
	0.02916	7.10595		0.02916	7.15903		0.03888	7.0884		0.02916	7.1219		0.02916	7.17552		0.02916	7.07372		0.02916	7.10643		0.02916	7.08305		0.02916	7.06818		0.02916	7.10295		0.02916	7.09105		0.02916	7.03664		0.02916	7.03487		0.02916	7.01249		0.02916	7.05099		0.02916	7.1076		0.02916
	0.03024	7.11461		0.03024	7.15612		0.04032	7.08156		0.03024	7.11917		0.03024	7.1631		0.03024	7.07323		0.03024	7.10325		0.03024	7.08618		0.03024	7.06006		0.03024	7.10825		0.03024	7.09745		0.03024	7.03469		0.03024	7.03947		0.03024	7.00794		0.03024	7.05131		0.03024	7.10344		0.03024
	0.03132	7.12345		0.03132	7.1528		0.04176	7.07965		0.03132	7.1175		0.03132	7.15085		0.03132	7.07442		0.03132	7.10042		0.03132	7.08952		0.03132	7.05203		0.03132	7.11404		0.03132	7.10466		0.03132	7.03174		0.03132	7.04346		0.03132	7.00515		0.03132	7.05088		0.03132	7.10012		0.03132
	0.0324	7.13177		0.0324	7.14912		0.0432	7.08263		0.0324	7.11712		0.0324	7.13985		0.0324	7.07715		0.0324	7.09752		0.0324	7.09271		0.0324	7.04497		0.0324	7.11973		0.0324	7.11185		0.0324	7.02791		0.0324	7.04647		0.0324	7.00449		0.0324	7.04975		0.0324	7.09822		0.0324
	0.03348	7.13894		0.03348	7.14501		0.04464	7.08972		0.03348	7.1182		0.03348	7.13091		0.03348	7.08128		0.03348	7.09406		0.03348	7.0954		0.03348	7.03953		0.03348	7.12473		0.03348	7.11824		0.03348	7.02341		0.03348	7.0483		0.03348	7.00625		0.03348	7.04839		0.03348	7.09792		0.03348
	0.03456	7.14442		0.03456	7.14033		0.04608	7.09952		0.03456	7.12073		0.03456	7.12445		0.03456	7.08661		0.03456	7.08981		0.03456	7.09729		0.03456	7.03628		0.03456	7.12873		0.03456	7.12315		0.03456	7.01865		0.03456	7.04899		0.03456	7.01048		0.03456	7.04756		0.03456	7.09906		0.03456
	0.03564	7.1478		0.03564	7.13503		0.04752	7.1103		0.03564	7.12463		0.03564	7.12048		0.03564	7.09285		0.03564	7.08497		0.03564	7.09824		0.03564	7.03562		0.03564	7.13168		0.03564	7.12618		0.03564	7.01424		0.03564	7.04892		0.03564	7.01683		0.03564	7.04796		0.03564	7.10118		0.03564
	0.03672	7.14884		0.03672	7.12929		0.04896	7.12026		0.03672	7.12962		0.03672	7.11863		0.03672	7.0996		0.03672	7.08016		0.03672	7.09826		0.03672	7.03771		0.03672	7.13353		0.03672	7.12718		0.03672	7.0107		0.03672	7.04873		0.03672	7.02438		0.03672	7.04996		0.03672	7.10375		0.03672
	0.0378	7.14771		0.0378	7.1236		0.0504	7.12796		0.0378	7.13521		0.0378	7.11834		0.0378	7.10638		0.0378	7.07619		0.0378	7.09746		0.0378	7.04221		0.0378	7.13404		0.0378	7.12637		0.0378	7.00836		0.0378	7.04898		0.0378	7.03185		0.0378	7.05346		0.0378	7.10611		0.0378
	0.03888	7.14491		0.03888	7.11857		0.05184	7.13277		0.03888	7.14087		0.03888	7.11907		0.03888	7.11272		0.03888	7.07374		0.03888	7.09601		0.03888	7.0484		0.03888	7.13297		0.03888	7.12418		0.03888	7.00735		0.03888	7.04989		0.03888	7.03786		0.03888	7.05797		0.03888	7.10762		0.03888
	0.03996	7.14123		0.03996	7.11484		0.05328	7.13491		0.03996	7.14629		0.03996	7.1204		0.03996	7.1183		0.03996	7.07312		0.03996	7.0941		0.03996	7.05537		0.03996	7.13035		0.03996	7.12124		0.03996	7.00774		0.03996	7.0513		0.03996	7.04134		0.03996	7.06269		0.03996	7.10761		0.03996
	0.04104	7.13747		0.04104	7.11293		0.05472	7.1352		0.04104	7.15154		0.04104	7.1221		0.04104	7.12289		0.04104	7.07424		0.04104	7.09206		0.04104	7.06223		0.04104	7.12664		0.04104	7.11825		0.04104	7.00947		0.04104	7.05292		0.04104	7.04175		0.04104	7.06657		0.04104	7.10574		0.04104
	0.04212	7.13431		0.04212	7.11337		0.05616	7.13455		0.04212	7.15699		0.04212	7.1241		0.04212	7.12647		0.04212	7.07669		0.04212	7.0903		0.04212	7.06826		0.04212	7.12239		0.04212	7.11591		0.04212	7.01221		0.04212	7.05445		0.04212	7.03912		0.04212	7.06847		0.04212	7.1021		0.04212
	0.0432	7.13221		0.0432	7.11653		0.0576	7.13361		0.0432	7.16309		0.0432	7.12643		0.0432	7.12926		0.0432	7.07984		0.0432	7.08927		0.0432	7.07289		0.0432	7.11807		0.0432	7.11472		0.0432	7.01525		0.0432	7.0556		0.0432	7.034		0.0432	7.06742		0.0432	7.09727		0.0432
	0.04428	7.13142		0.04428	7.12232		0.05904	7.13288		0.04428	7.17022		0.04428	7.12936		0.04428	7.13165		0.04428	7.083		0.04428	7.08927		0.04428	7.07576		0.04428	7.11393		0.04428	7.11487		0.04428	7.01765		0.04428	7.05596		0.04428	7.02737		0.04428	7.06291		0.04428	7.09204		0.04428
	0.04536	7.13201		0.04536	7.13018		0.06048	7.13268		0.04536	7.1787		0.04536	7.13328		0.04536	7.13419		0.04536	7.08566		0.04536	7.09037		0.04536	7.07685		0.04536	7.11025		0.04536	7.1162		0.04536	7.01853		0.04536	7.05504		0.04536	7.02038		0.04536	7.05492		0.04536	7.08716		0.04536
	0.04644	7.13369		0.04644	7.13913		0.06192	7.13316		0.04644	7.1888		0.04644	7.13849		0.04644	7.13731		0.04644	7.08764		0.04644	7.09234		0.04644	7.07648		0.04644	7.10742		0.04644	7.11842		0.04644	7.01745		0.04644	7.05253		0.04644	7.01426		0.04644	7.04402		0.04644	7.08323		0.04644
	0.04752	7.13599		0.04752	7.14819		0.06336	7.13429		0.04752	7.20054		0.04752	7.14499		0.04752	7.14099		0.04752	7.08913		0.04752	7.09502		0.04752	7.07523		0.04752	7.10578		0.04752	7.12106		0.04752	7.01452		0.04752	7.04851		0.04752	7.01005		0.04752	7.03111		0.04752	7.08064		0.04752
	0.0486	7.13828		0.0486	7.15654		0.0648	7.13584		0.0486	7.21343		0.0486	7.15237		0.0486	7.14475		0.0486	7.09065		0.0486	7.09821		0.0486	7.07371		0.0486	7.10538		0.0486	7.12355		0.0486	7.01039		0.0486	7.04331		0.0486	7.00832		0.0486	7.01742		0.0486	7.07964		0.0486
	0.04968	7.14012		0.04968	7.16355		0.06624	7.13753		0.04968	7.22651		0.04968	7.1599		0.04968	7.14783		0.04968	7.09282		0.04968	7.10172		0.04968	7.07242		0.04968	7.10595		0.04968	7.12508		0.04968	7.00599		0.04968	7.03737		0.04968	7.00906		0.04968	7.00425		0.04968	7.08031		0.04968
	0.05076	7.14129		0.05076	7.16878		0.06768	7.13919		0.05076	7.23858		0.05076	7.16689		0.05076	7.14939		0.05076	7.09623		0.05076	7.10517		0.05076	7.07171		0.05076	7.10703		0.05076	7.1248		0.05076	7.00242		0.05076	7.03102		0.05076	7.01181		0.05076	6.99291		0.05076	7.08244		0.05076
	0.05184	7.14185		0.05184	7.17197		0.06912	7.14079		0.05184	7.24871		0.05184	7.17286		0.05184	7.14884		0.05184	7.10112		0.05184	7.10809		0.05184	7.07169		0.05184	7.10814		0.05184	7.12214		0.05184	7.00067		0.05184	7.02453		0.05184	7.01585		0.05184	6.98448		0.05184	7.08562		0.05184
	0.05292	7.14197		0.05292	7.17322		0.07056	7.14225		0.05292	7.25633		0.05292	7.1775		0.05292	7.14589		0.05292	7.10715		0.05292	7.11016		0.05292	7.07232		0.05292	7.10891		0.05292	7.11708		0.05292	7.00138		0.05292	7.0182		0.05292	7.02056		0.05292	6.9798		0.05292	7.08935		0.05292
	0.054	7.14192		0.054	7.17305		0.072	7.1434		0.054	7.26126		0.054	7.18067		0.054	7.14073		0.054	7.11346		0.054	7.11141		0.054	7.07335		0.054	7.10893		0.054	7.11016		0.054	7.00474		0.054	7.01232		0.054	7.02534		0.054	6.97939		0.054	7.09327		0.054
	0.05508	7.14195		0.05508	7.17223		0.07344	7.14394		0.05508	7.26351		0.05508	7.18252		0.05508	7.13403		0.05508	7.11901		0.05508	7.1121		0.05508	7.07436		0.05508	7.10774		0.05508	7.10216		0.05508	7.01038		0.05508	7.00706		0.05508	7.02965		0.05508	6.9833		0.05508	7.09727		0.05508
	0.05616	7.14233		0.05616	7.17148		0.07488	7.14353		0.05616	7.26332		0.05616	7.18354		0.05616	7.12694		0.05616	7.12293		0.05616	7.11249		0.05616	7.07493		0.05616	7.105		0.05616	7.09394		0.05616	7.01761		0.05616	7.00241		0.05616	7.03291		0.05616	6.99102		0.05616	7.10126		0.05616
	0.05724	7.14314		0.05724	7.17117		0.07632	7.14209		0.05724	7.26128		0.05724	7.18438		0.05724	7.12068		0.05724	7.12472		0.05724	7.11266		0.05724	7.07479		0.05724	7.1007		0.05724	7.08631		0.05724	7.02567		0.05724	6.99831		0.05724	7.03479		0.05724	7.0015		0.05724	7.10511		0.05724
	0.05832	7.14437		0.05832	7.17123		0.07776	7.13976		0.05832	7.25821		0.05832	7.18555		0.05832	7.11615		0.05832	7.12427		0.05832	7.11259		0.05832	7.07386		0.05832	7.09539		0.05832	7.08005		0.05832	7.03382		0.05832	6.99486		0.05832	7.03525		0.05832	7.01342		0.05832	7.10861		0.05832
	0.0594	7.14583		0.0594	7.17125		0.079201	7.13692		0.0594	7.25492		0.0594	7.18709		0.0594	7.11376		0.0594	7.12181		0.0594	7.1124		0.0594	7.07235		0.0594	7.08997		0.0594	7.07583		0.0594	7.04147		0.0594	6.99245		0.0594	7.03464		0.0594	7.02541		0.0594	7.11169		0.0594
	0.06048	7.14719		0.06048	7.17067		0.080641	7.13398		0.06048	7.25193		0.06048	7.18874		0.06048	7.11344		0.06048	7.11787		0.06048	7.11229		0.06048	7.07067		0.06048	7.08533		0.06048	7.07399		0.06048	7.04826		0.06048	6.99165		0.06048	7.03346		0.06048	7.03626		0.06048	7.11463		0.06048
	0.06156	7.14794		0.06156	7.16895		0.082081	7.13134		0.06156	7.2494		0.06156	7.19011		0.06156	7.11486		0.06156	7.11343		0.06156	7.11249		0.06156	7.06935		0.06156	7.08191		0.06156	7.07426		0.06156	7.05408		0.06156	6.993		0.06156	7.03207		0.06156	7.04494		0.06156	7.11795		0.06156
	0.06264	7.14756		0.06264	7.16566		0.083521	7.12928		0.06264	7.24733		0.06264	7.19082		0.06264	7.11758		0.06264	7.10956		0.06264	7.11315		0.06264	7.06896		0.06264	7.07976		0.06264	7.07603		0.06264	7.0591		0.06264	6.99682		0.06264	7.03075		0.06264	7.05079		0.06264	7.12226		0.06264
	0.06372	7.14578		0.06372	7.16063		0.084961	7.12795		0.06372	7.24566		0.06372	7.1905		0.06372	7.1211		0.06372	7.1071		0.06372	7.11435		0.06372	7.0698		0.06372	7.07872		0.06372	7.07853		0.06372	7.06346		0.06372	7.00312		0.06372	7.02965		0.06372	7.0536		0.06372	7.12787		0.06372
	0.0648	7.14272		0.0648	7.15398		0.086401	7.12731		0.0648	7.24439		0.0648	7.18882		0.0648	7.125		0.0648	7.10626		0.0648	7.11632		0.0648	7.07182		0.0648	7.07851		0.0648	7.08116		0.0648	7.06701		0.0648	7.01162		0.0648	7.02892		0.0648	7.05367		0.0648	7.13474		0.0648
	0.06588	7.13882		0.06588	7.14625		0.087841	7.12708		0.06588	7.24364		0.06588	7.18577		0.06588	7.12898		0.06588	7.1068		0.06588	7.11938		0.06588	7.07468		0.06588	7.07863		0.06588	7.0835		0.06588	7.06931		0.06588	7.02167		0.06588	7.02862		0.06588	7.05166		0.06588	7.14257		0.06588
	0.06696	7.13467		0.06696	7.13821		0.089281	7.12685		0.06696	7.24361		0.06696	7.18166		0.06696	7.13288		0.06696	7.10834		0.06696	7.12378		0.06696	7.0779		0.06696	7.07833		0.06696	7.08532		0.06696	7.06991		0.06696	7.03224		0.06696	7.02866		0.06696	7.04842		0.06696	7.15092		0.06696
	0.06804	7.13074		0.06804	7.13088		0.090721	7.12624		0.06804	7.24448		0.06804	7.17706		0.06804	7.13655		0.06804	7.11054		0.06804	7.12951		0.06804	7.08095		0.06804	7.07688		0.06804	7.0864		0.06804	7.06859		0.06804	7.04204		0.06804	7.02877		0.06804	7.04467		0.06804	7.15909		0.06804
	0.06912	7.1274		0.06912	7.12534		0.092161	7.12497		0.06912	7.24634		0.06912	7.17241		0.06912	7.13966		0.06912	7.11298		0.06912	7.13616		0.06912	7.08321		0.06912	7.07409		0.06912	7.08664		0.06912	7.06539		0.06912	7.04977		0.06912	7.02852		0.06912	7.04097		0.06912	7.16602		0.06912
	0.0702	7.12494		0.0702	7.12252		0.093601	7.12296		0.0702	7.24911		0.0702	7.16789		0.0702	7.14168		0.0702	7.11521		0.0702	7.14301		0.0702	7.08408		0.0702	7.07056		0.0702	7.0861		0.0702	7.06044		0.0702	7.05449		0.0702	7.02755		0.0702	7.03757		0.0702	7.17041		0.0702
	0.07128	7.12351		0.07128	7.12306		0.095041	7.12033		0.07128	7.2525		0.07128	7.16352		0.07128	7.14207		0.07128	7.11684		0.07128	7.14931		0.07128	7.08312		0.07128	7.06738		0.07128	7.08495		0.07128	7.05383		0.07128	7.05603		0.07128	7.02565		0.07128	7.03458		0.07128	7.17109		0.07128
	0.07236	7.12305		0.07236	7.12711		0.096481	7.11735		0.07236	7.25609		0.07236	7.15939		0.07236	7.14045		0.07236	7.11775		0.07236	7.15435		0.07236	7.08041		0.07236	7.06562		0.07236	7.08337		0.07236	7.04582		0.07236	7.05495		0.07236	7.02286		0.07236	7.03192		0.07236	7.16751		0.07236
	0.07344	7.12312		0.07344	7.13438		0.097921	7.1144		0.07344	7.2594		0.07344	7.15565		0.07344	7.13673		0.07344	7.11815		0.07344	7.15755		0.07344	7.07644		0.07344	7.0659		0.07344	7.08141		0.07344	7.03695		0.07344	7.05228		0.07344	7.01951		0.07344	7.02949		0.07344	7.16003		0.07344
	0.07452	7.12299		0.07452	7.14433		0.099361	7.1119		0.07452	7.26191		0.07452	7.15244		0.07452	7.13113		0.07452	7.11832		0.07452	7.15848		0.07452	7.07182		0.07452	7.06831		0.07452	7.07889		0.07452	7.02804		0.07452	7.04901		0.07452	7.01598		0.07452	7.02706		0.07452	7.14969		0.07452
	0.0756	7.12186		0.0756	7.15625		0.100801	7.11008		0.0756	7.26312		0.0756	7.14971		0.0756	7.12417		0.0756	7.11837		0.0756	7.15692		0.0756	7.06691		0.0756	7.07248		0.0756	7.07557		0.0756	7.01989		0.0756	7.04588		0.0756	7.01269		0.0756	7.02436		0.0756	7.13785		0.0756
	0.07668	7.11911		0.07668	7.16919		0.102241	7.10905		0.07668	7.26271		0.07668	7.14735		0.07668	7.11651		0.07668	7.11842		0.07668	7.15313		0.07668	7.06177		0.07668	7.07765		0.07668	7.07137		0.07668	7.01299		0.07668	7.04325		0.07668	7.00995		0.07668	7.02104		0.07668	7.12594		0.07668
	0.07776	7.11459		0.07776	7.18193		0.103681	7.10865		0.07776	7.26058		0.07776	7.14526		0.07776	7.1089		0.07776	7.11868		0.07776	7.14787		0.07776	7.05646		0.07776	7.08278		0.07776	7.06642		0.07776	7.00765		0.07776	7.0412		0.07776	7.00784		0.07776	7.0169		0.07776	7.11517		0.07776
	0.078841	7.10863		0.078841	7.19306		0.105121	7.10866		0.078841	7.25703		0.078841	7.1434		0.078841	7.10193		0.078841	7.11954		0.078841	7.1422		0.078841	7.05116		0.078841	7.08675		0.078841	7.06115		0.078841	7.00412		0.078841	7.03946		0.078841	7.00631		0.078841	7.01202		0.078841	7.10658		0.078841
	0.079921	7.10188		0.079921	7.20141		0.106561	7.10868		0.079921	7.2525		0.079921	7.14162		0.079921	7.0959		0.079921	7.12129		0.079921	7.13715		0.079921	7.04617		0.079921	7.08868		0.079921	7.05619		0.079921	7.00265		0.079921	7.03746		0.079921	7.00521		0.079921	7.00682		0.079921	7.10083		0.079921
	0.081001	7.095		0.081001	7.20635		0.108001	7.10834		0.081001	7.24741		0.081001	7.13969		0.081001	7.09079		0.081001	7.12398		0.081001	7.13341		0.081001	7.04169		0.081001	7.08814		0.081001	7.05215		0.081001	7.00325		0.081001	7.03458		0.081001	7.00433		0.081001	7.00187		0.081001	7.09797		0.081001
	0.082081	7.08862		0.082081	7.20794		0.109441	7.10745		0.082081	7.24201		0.082081	7.13735		0.082081	7.0864		0.082081	7.12737		0.082081	7.13128		0.082081	7.03779		0.082081	7.08523		0.082081	7.04959		0.082081	7.00559		0.082081	7.03053		0.082081	7.00332		0.082081	6.99769		0.082081	7.09751		0.082081
	0.083161	7.08326		0.083161	7.2067		0.110881	7.10604		0.083161	7.23646		0.083161	7.13451		0.083161	7.08254		0.083161	7.13104		0.083161	7.13077		0.083161	7.0345		0.083161	7.08059		0.083161	7.04899		0.083161	7.00901		0.083161	7.02569		0.083161	7.0018		0.083161	6.99469		0.083161	7.09868		0.083161
	0.084241	7.07949		0.084241	7.20335		0.112321	7.1044		0.084241	7.231		0.084241	7.13143		0.084241	7.07922		0.084241	7.13443		0.084241	7.13169		0.084241	7.03194		0.084241	7.07508		0.084241	7.05066		0.084241	7.01282		0.084241	7.0209		0.084241	6.99952		0.084241	6.99325		0.084241	7.1008		0.084241
	0.085321	7.07778		0.085321	7.19866		0.113761	7.10286		0.085321	7.22605		0.085321	7.12871		0.085321	7.07663		0.085321	7.1368		0.085321	7.1336		0.085321	7.03018		0.085321	7.06965		0.085321	7.05462		0.085321	7.01638		0.085321	7.01711		0.085321	6.99657		0.085321	6.99372		0.085321	7.10349		0.085321
	0.086401	7.07821		0.086401	7.19333		0.115201	7.1017		0.086401	7.22209		0.086401	7.12697		0.086401	7.07515		0.086401	7.13735		0.086401	7.13584		0.086401	7.02913		0.086401	7.06498		0.086401	7.06051		0.086401	7.01918		0.086401	7.01498		0.086401	6.9934		0.086401	6.99629		0.086401	7.10655		0.086401
	0.087481	7.08031		0.087481	7.18788		0.116641	7.10109		0.087481	7.21941		0.087481	7.12678		0.087481	7.07527		0.087481	7.13553		0.087481	7.13763		0.087481	7.02853		0.087481	7.06144		0.087481	7.06764		0.087481	7.02078		0.087481	7.01485		0.087481	6.9906		0.087481	7.00076		0.087481	7.1098		0.087481
	0.088561	7.08329		0.088561	7.18244		0.118081	7.10111		0.088561	7.21809		0.088561	7.12851		0.088561	7.07752		0.088561	7.13131		0.088561	7.13826		0.088561	7.02802		0.088561	7.05919		0.088561	7.07502		0.088561	7.02107		0.088561	7.01681		0.088561	6.98872		0.088561	7.00644		0.088561	7.11309		0.088561
	0.089641	7.08644		0.089641	7.17666		0.119521	7.10168		0.089641	7.21806		0.089641	7.13223		0.089641	7.08235		0.089641	7.12522		0.089641	7.13734		0.089641	7.02728		0.089641	7.05826		0.089641	7.08159		0.089641	7.02029		0.089641	7.02062		0.089641	6.98822		0.089641	7.0124		0.089641	7.11634		0.089641
	0.090721	7.08946		0.090721	7.1699		0.120961	7.10248		0.090721	7.21924		0.090721	7.13778		0.090721	7.08974		0.090721	7.11822		0.090721	7.13492		0.090721	7.02612		0.090721	7.05868		0.090721	7.0865		0.090721	7.01905		0.090721	7.02559		0.090721	6.9894		0.090721	7.01772		0.090721	7.11957		0.090721
	0.091801	7.09234		0.091801	7.1616		0.122401	7.10306		0.091801	7.22143		0.091801	7.14459		0.091801	7.09909		0.091801	7.11143		0.091801	7.13141		0.091801	7.02457		0.091801	7.06043		0.091801	7.08935		0.091801	7.01806		0.091801	7.03067		0.091801	6.99238		0.091801	7.02184		0.091801	7.12272		0.091801
	0.092881	7.09512		0.092881	7.15165		0.123841	7.10304		0.092881	7.22425		0.092881	7.15187		0.092881	7.10935		0.092881	7.10593		0.092881	7.12746		0.092881	7.02299		0.092881	7.06338		0.092881	7.09028		0.092881	7.01796		0.092881	7.0348		0.092881	6.99693		0.092881	7.02447		0.092881	7.12548		0.092881
	0.093961	7.09783		0.093961	7.14058		0.125281	7.10241		0.093961	7.22713		0.093961	7.15873		0.093961	7.11937		0.093961	7.10262		0.093961	7.12368		0.093961	7.02203		0.093961	7.06728		0.093961	7.08975		0.093961	7.01911		0.093961	7.03732		0.093961	7.00243		0.093961	7.02547		0.093961	7.12742		0.093961
	0.095041	7.10069		0.095041	7.12943		0.126721	7.10151		0.095041	7.22955		0.095041	7.16453		0.095041	7.12816		0.095041	7.10193		0.095041	7.1205		0.095041	7.02235		0.095041	7.07185		0.095041	7.08828		0.095041	7.02165		0.095041	7.03805		0.095041	7.00808		0.095041	7.02484		0.095041	7.12818		0.095041
	0.096121	7.10419		0.096121	7.1195		0.128161	7.1008		0.096121	7.23122		0.096121	7.1689		0.096121	7.13484		0.096121	7.10369		0.096121	7.11818		0.096121	7.02423		0.096121	7.07667		0.096121	7.08645		0.096121	7.02537		0.096121	7.0371		0.096121	7.01307		0.096121	7.0227		0.096121	7.12767		0.096121
	0.097201	7.10884		0.097201	7.11202		0.129601	7.10071		0.097201	7.23214		0.097201	7.17166		0.097201	7.13862		0.097201	7.10716		0.097201	7.11691		0.097201	7.02745		0.097201	7.0813		0.097201	7.08488		0.097201	7.0298		0.097201	7.03462		0.097201	7.01665		0.097201	7.01951		0.097201	7.12597		0.097201
	0.098281	7.1148		0.098281	7.10783		0.131041	7.10142		0.098281	7.23228		0.098281	7.1728		0.098281	7.13898		0.098281	7.11138		0.098281	7.11677		0.098281	7.03141		0.098281	7.08524		0.098281	7.0842		0.098281	7.03418		0.098281	7.03075		0.098281	7.01824		0.098281	7.0159		0.098281	7.12329		0.098281
	0.099361	7.1217		0.099361	7.10733		0.132481	7.10296		0.099361	7.23154		0.099361	7.17236		0.099361	7.13602		0.099361	7.11547		0.099361	7.11759		0.099361	7.03532		0.099361	7.08811		0.099361	7.08482		0.099361	7.0377		0.099361	7.0259		0.099361	7.01749		0.099361	7.01253		0.099361	7.11985		0.099361
	0.100441	7.12889		0.100441	7.11034		0.133921	7.10511		0.100441	7.22971		0.100441	7.17057		0.100441	7.13049		0.100441	7.11895		0.100441	7.1189		0.100441	7.03837		0.100441	7.08974		0.100441	7.08661		0.100441	7.03972		0.100441	7.02072		0.100441	7.01457		0.100441	7.00979		0.100441	7.11604		0.100441
	0.101521	7.13569		0.101521	7.1162		0.135361	7.10738		0.101521	7.22657		0.101521	7.16782		0.101521	7.12339		0.101521	7.12169		0.101521	7.12		0.101521	7.03972		0.101521	7.09012		0.101521	7.08896		0.101521	7.03985		0.101521	7.01612		0.101521	7.01012		0.101521	7.00784		0.101521	7.11222		0.101521
	0.102601	7.14157		0.102601	7.12393		0.136801	7.10903		0.102601	7.22208		0.102601	7.16451		0.102601	7.11555		0.102601	7.12373		0.102601	7.1204		0.102601	7.03871		0.102601	7.08938		0.102601	7.09115		0.102601	7.03804		0.102601	7.01288		0.102601	7.00508		0.102601	7.0067		0.102601	7.10877		0.102601
	0.103681	7.14611		0.103681	7.1324		0.138241	7.10921		0.103681	7.2163		0.103681	7.16093		0.103681	7.10751		0.103681	7.1251		0.103681	7.12012		0.103681	7.03523		0.103681	7.08794		0.103681	7.09273		0.103681	7.03454		0.103681	7.01154		0.103681	7.00023		0.103681	7.00641		0.103681	7.10595		0.103681
	0.104761	7.14907		0.104761	7.14073		0.139681	7.10731		0.104761	7.20942		0.104761	7.15734		0.104761	7.09974		0.104761	7.12586		0.104761	7.11951		0.104761	7.02994		0.104761	7.08653		0.104761	7.0936		0.104761	7.02993		0.104761	7.01241		0.104761	6.99625		0.104761	7.00702		0.104761	7.10395		0.104761
	0.105841	7.15044		0.105841	7.14849		0.141121	7.10315		0.105841	7.20183		0.105841	7.15393		0.105841	7.09292		0.105841	7.12606		0.105841	7.11902		0.105841	7.0241		0.105841	7.08603		0.105841	7.09391		0.105841	7.02505		0.105841	7.01569		0.105841	6.99374		0.105841	7.00837		0.105841	7.10277		0.105841
	0.106921	7.15056		0.106921	7.15571		0.142561	7.0971		0.106921	7.19414		0.106921	7.15099		0.106921	7.08784		0.106921	7.12573		0.106921	7.11891		0.106921	7.01907		0.106921	7.08706		0.106921	7.09385		0.106921	7.02077		0.106921	7.02143		0.106921	6.99325		0.106921	7.01005		0.106921	7.10227		0.106921
	0.108001	7.14995		0.108001	7.16262		0.144001	7.0898		0.108001	7.18714		0.108001	7.14878		0.108001	7.085		0.108001	7.12468		0.108001	7.11928		0.108001	7.01593		0.108001	7.08972		0.108001	7.09354		0.108001	7.01765		0.108001	7.02934		0.108001	6.99503		0.108001	7.01153		0.108001	7.1021		0.108001
	0.109081	7.14903		0.109081	7.1694		0.145441	7.08204		0.109081	7.18164		0.109081	7.14745		0.109081	7.0845		0.109081	7.12253		0.109081	7.12029		0.109081	7.01534		0.109081	7.09376		0.109081	7.09307		0.109081	7.01572		0.109081	7.03853		0.109081	6.99876		0.109081	7.01239		0.109081	7.10188		0.109081
	0.110161	7.14793		0.110161	7.17604		0.146881	7.07454		0.110161	7.17824		0.110161	7.14684		0.110161	7.0862		0.110161	7.11888		0.110161	7.12218		0.110161	7.01762		0.110161	7.09885		0.110161	7.09232		0.110161	7.01459		0.110161	7.04778		0.110161	7.00367		0.110161	7.01248		0.110161	7.10139		0.110161
	0.111241	7.14651		0.111241	7.18237		0.148321	7.06798		0.111241	7.17718		0.111241	7.14665		0.111241	7.08995		0.111241	7.11375		0.111241	7.12514		0.111241	7.02271		0.111241	7.1046		0.111241	7.09109		0.111241	7.0137		0.111241	7.05592		0.111241	7.00897		0.111241	7.01193		0.111241	7.10059		0.111241
	0.112321	7.14456		0.112321	7.1881		0.149761	7.06286		0.112321	7.17832		0.112321	7.14639		0.112321	7.09545		0.112321	7.10773		0.112321	7.12909		0.112321	7.03023		0.112321	7.11048		0.112321	7.08917		0.112321	7.01252		0.112321	7.06222		0.112321	7.01408		0.112321	7.01095		0.112321	7.09947		0.112321
	0.113401	7.14191		0.113401	7.19279		0.151201	7.05941		0.113401	7.18124		0.113401	7.14573		0.113401	7.10203		0.113401	7.10176		0.113401	7.13356		0.113401	7.03939		0.113401	7.1157		0.113401	7.08638		0.113401	7.01063		0.113401	7.06633		0.113401	7.01864		0.113401	7.0099		0.113401	7.09811		0.113401
	0.114481	7.13849		0.114481	7.19585		0.152641	7.05749		0.114481	7.18533		0.114481	7.14447		0.114481	7.10859		0.114481	7.09677		0.114481	7.13799		0.114481	7.04921		0.114481	7.11957		0.114481	7.08263		0.114481	7.00781		0.114481	7.06817		0.114481	7.02226		0.114481	7.00918		0.114481	7.09667		0.114481
	0.115561	7.13429		0.115561	7.19676		0.154081	7.05668		0.115561	7.18992		0.115561	7.14262		0.115561	7.11384		0.115561	7.09329		0.115561	7.14208		0.115561	7.05883		0.115561	7.12181		0.115561	7.0779		0.115561	7.00423		0.115561	7.06776		0.115561	7.02459		0.115561	7.00915		0.115561	7.09548		0.115561
	0.116641	7.1295		0.116641	7.19529		0.155521	7.05659		0.116641	7.19436		0.116641	7.14034		0.116641	7.11678		0.116641	7.09155		0.116641	7.14589		0.116641	7.0675		0.116641	7.12276		0.116641	7.07244		0.116641	7.00056		0.116641	7.06541		0.116641	7.0256		0.116641	7.00997		0.116641	7.09487		0.116641
	0.117721	7.12455		0.117721	7.19157		0.156961	7.05714		0.117721	7.19801		0.117721	7.13798		0.117721	7.11695		0.117721	7.09169		0.117721	7.14971		0.117721	7.0745		0.117721	7.1229		0.117721	7.06691		0.117721	6.99786		0.117721	7.06178		0.117721	7.02575		0.117721	7.01145		0.117721	7.09494		0.117721
	0.118801	7.12013		0.118801	7.18607		0.158401	7.05855		0.118801	7.20022		0.118801	7.13609		0.118801	7.11447		0.118801	7.09378		0.118801	7.15373		0.118801	7.07917		0.118801	7.12246		0.118801	7.06227		0.118801	6.99722		0.118801	7.05764		0.118801	7.0258		0.118801	7.01304		0.118801	7.09567		0.118801
	0.119881	7.1169		0.119881	7.17943		0.159841	7.06114		0.119881	7.20054		0.119881	7.13535		0.119881	7.10998		0.119881	7.09755		0.119881	7.15787		0.119881	7.08093		0.119881	7.12128		0.119881	7.05954		0.119881	6.9993		0.119881	7.05351		0.119881	7.02631		0.119881	7.01401		0.119881	7.09696		0.119881
	0.120961	7.11527		0.120961	7.17241		0.161281	7.06507		0.120961	7.19878		0.120961	7.13637		0.120961	7.10447		0.120961	7.10228		0.120961	7.16197		0.120961	7.07948		0.120961	7.11908		0.120961	7.05929		0.120961	7.00412		0.120961	7.0495		0.120961	7.02739		0.120961	7.01391		0.120961	7.09881		0.120961
	0.122041	7.11524		0.122041	7.16589		0.162721	7.0702		0.122041	7.19502		0.122041	7.13938		0.122041	7.09922		0.122041	7.10697		0.122041	7.16592		0.122041	7.07504		0.122041	7.11561		0.122041	7.06159		0.122041	7.01107		0.122041	7.04553		0.122041	7.02876		0.122041	7.0126		0.122041	7.10124		0.122041
	0.123121	7.11649		0.123121	7.16071		0.164161	7.07626		0.123121	7.18952		0.123121	7.14414		0.123121	7.09553		0.123121	7.11075		0.123121	7.16962		0.123121	7.06821		0.123121	7.11068		0.123121	7.06604		0.123121	7.01911		0.123121	7.04164		0.123121	7.03006		0.123121	7.01032		0.123121	7.10432		0.123121
	0.124201	7.11857		0.124201	7.1575		0.165601	7.0828		0.124201	7.18263		0.124201	7.15		0.124201	7.09424		0.124201	7.11311		0.124201	7.17277		0.124201	7.05988		0.124201	7.10397		0.124201	7.07207		0.124201	7.02695		0.124201	7.03797		0.124201	7.03103		0.124201	7.00753		0.124201	7.10809		0.124201
	0.125281	7.12095		0.125281	7.15651		0.167041	7.08929		0.125281	7.17488		0.125281	7.15624		0.125281	7.09548		0.125281	7.1138		0.125281	7.1748		0.125281	7.05101		0.125281	7.09522		0.125281	7.07901		0.125281	7.03327		0.125281	7.03461		0.125281	7.03147		0.125281	7.00485		0.125281	7.11267		0.125281
	0.126361	7.12301		0.126361	7.15759		0.168481	7.09502		0.126361	7.16706		0.126361	7.1622		0.126361	7.09873		0.126361	7.11265		0.126361	7.17502		0.126361	7.04248		0.126361	7.08464		0.126361	7.08603		0.126361	7.03697		0.126361	7.03153		0.126361	7.03109		0.126361	7.00301		0.126361	7.1182		0.126361
	0.127441	7.12411		0.127441	7.16035		0.169921	7.09924		0.127441	7.16006		0.127441	7.16732		0.127441	7.10307		0.127441	7.10952		0.127441	7.173		0.127441	7.03517		0.127441	7.07304		0.127441	7.09221		0.127441	7.03743		0.127441	7.02873		0.127441	7.02959		0.127441	7.00273		0.127441	7.1246		0.127441
	0.128521	7.12385		0.128521	7.16427		0.171361	7.10157		0.128521	7.15474		0.128521	7.17106		0.128521	7.10754		0.128521	7.10448		0.128521	7.16874		0.128521	7.0298		0.128521	7.06165		0.128521	7.09682		0.128521	7.03459		0.128521	7.02647		0.128521	7.02693		0.128521	7.00441		0.128521	7.13162		0.128521
	0.129601	7.12218		0.129601	7.16873		0.172801	7.10214		0.129601	7.15162		0.129601	7.17308		0.129601	7.11135		0.129601	7.09805		0.129601	7.1626		0.129601	7.02663		0.129601	7.05163		0.129601	7.09952		0.129601	7.02892		0.129601	7.02515		0.129601	7.02355		0.129601	7.00793		0.129601	7.13882		0.129601
	0.130681	7.11949		0.130681	7.17301		0.174241	7.10161		0.130681	7.15089		0.130681	7.17337		0.130681	7.11398		0.130681	7.0911		0.130681	7.15508		0.130681	7.02533		0.130681	7.04389		0.130681	7.10053		0.130681	7.02127		0.130681	7.025		0.130681	7.02028		0.130681	7.01268		0.130681	7.14586		0.130681
	0.131761	7.11639		0.131761	7.17643		0.175681	7.1008		0.131761	7.1525		0.131761	7.17234		0.131761	7.11523		0.131761	7.08461		0.131761	7.14664		0.131761	7.02513		0.131761	7.03901		0.131761	7.10038		0.131761	7.01274		0.131761	7.02591		0.131761	7.01791		0.131761	7.01793		0.131761	7.15247		0.131761
	0.132841	7.11338		0.132841	7.17848		0.177121	7.10045		0.132841	7.15611		0.132841	7.17066		0.132841	7.1153		0.132841	7.07937		0.132841	7.13774		0.132841	7.02521		0.132841	7.03729		0.132841	7.09968		0.132841	7.00439		0.132841	7.02743		0.132841	7.01681		0.132841	7.02313		0.132841	7.15831		0.132841
	0.133921	7.11089		0.133921	7.17889		0.178561	7.10104		0.133921	7.16101		0.133921	7.16896		0.133921	7.11456		0.133921	7.07599		0.133921	7.12886		0.133921	7.02511		0.133921	7.03863		0.133921	7.09896		0.133921	6.99711		0.133921	7.02908		0.133921	7.01689		0.133921	7.02796		0.133921	7.16303		0.133921
	0.135001	7.10938		0.135001	7.17767		0.180001	7.1027		0.135001	7.16609		0.135001	7.1677		0.135001	7.11343		0.135001	7.07484		0.135001	7.12044		0.135001	7.02487		0.135001	7.04234		0.135001	7.09871		0.135001	6.99134		0.135001	7.03055		0.135001	7.01789		0.135001	7.03228		0.135001	7.16631		0.135001
	0.136081	7.10928		0.136081	7.17494		0.181441	7.10532		0.136081	7.17012		0.136081	7.1673		0.136081	7.11209		0.136081	7.07597		0.136081	7.11282		0.136081	7.02475		0.136081	7.04743		0.136081	7.09937		0.136081	6.98727		0.136081	7.03176		0.136081	7.01971		0.136081	7.03597		0.136081	7.16802		0.136081
	0.137161	7.11088		0.137161	7.17081		0.182881	7.10848		0.137161	7.17205		0.137161	7.16815		0.137161	7.11052		0.137161	7.07904		0.137161	7.10617		0.137161	7.02511		0.137161	7.05298		0.137161	7.10111		0.137161	6.98491		0.137161	7.03265		0.137161	7.02229		0.137161	7.03901		0.137161	7.16819		0.137161
	0.138241	7.11407		0.138241	7.16529		0.184321	7.11148		0.138241	7.1712		0.138241	7.17057		0.138241	7.10855		0.138241	7.08341		0.138241	7.10055		0.138241	7.02633		0.138241	7.05847		0.138241	7.10374		0.138241	6.9844		0.138241	7.03323		0.138241	7.0254		0.138241	7.04162		0.138241	7.16692		0.138241
	0.139321	7.11833		0.139321	7.15836		0.185761	7.1135		0.139321	7.16726		0.139321	7.17459		0.139321	7.10602		0.139321	7.08839		0.139321	7.09612		0.139321	7.02888		0.139321	7.06379		0.139321	7.10664		0.139321	6.98583		0.139321	7.03354		0.139321	7.02852		0.139321	7.04418		0.139321	7.16425		0.139321
	0.140401	7.12296		0.140401	7.15022		0.187201	7.11377		0.140401	7.16036		0.140401	7.17981		0.140401	7.10293		0.140401	7.09339		0.140401	7.09309		0.140401	7.03315		0.140401	7.06888		0.140401	7.10911		0.140401	6.9891		0.140401	7.03376		0.140401	7.03108		0.140401	7.04703		0.140401	7.16026		0.140401
	0.141481	7.12735		0.141481	7.14133		0.188641	7.11189		0.141481	7.15123		0.141481	7.18555		0.141481	7.09955		0.141481	7.09801		0.141481	7.09173		0.141481	7.03924		0.141481	7.07372		0.141481	7.11045		0.141481	6.99372		0.141481	7.03418		0.141481	7.03276		0.141481	7.05029		0.141481	7.15522		0.141481
	0.142561	7.131		0.142561	7.13245		0.190081	7.10801		0.142561	7.14121		0.142561	7.19103		0.142561	7.09637		0.142561	7.10206		0.142561	7.09218		0.142561	7.04673		0.142561	7.07836		0.142561	7.10998		0.142561	6.99903		0.142561	7.03505		0.142561	7.03347		0.142561	7.05384		0.142561	7.14951		0.142561
	0.143641	7.13345		0.143641	7.12438		0.191521	7.1026		0.143641	7.13195		0.143641	7.19557		0.143641	7.09388		0.143641	7.10558		0.143641	7.09448		0.143641	7.0549		0.143641	7.08297		0.143641	7.10712		0.143641	7.0045		0.143641	7.03646		0.143641	7.03306		0.143641	7.05759		0.143641	7.14357		0.143641
	0.144721	7.13431		0.144721	7.11782		0.192961	7.09633		0.144721	7.125		0.144721	7.19861		0.144721	7.09232		0.144721	7.10891		0.144721	7.09847		0.144721	7.06294		0.144721	7.08783		0.144721	7.10159		0.144721	7.0097		0.144721	7.03838		0.144721	7.03118		0.144721	7.06152		0.144721	7.13768		0.144721
	0.145801	7.13337		0.145801	7.11334		0.194401	7.08986		0.145801	7.12144		0.145801	7.19981		0.145801	7.09155		0.145801	7.11263		0.145801	7.1037		0.145801	7.07026		0.145801	7.09291		0.145801	7.09375		0.145801	7.01413		0.145801	7.04083		0.145801	7.02752		0.145801	7.06558		0.145801	7.13202		0.145801
	0.146881	7.13084		0.146881	7.11141		0.195841	7.08383		0.146881	7.12182		0.146881	7.19909		0.146881	7.09111		0.146881	7.1172		0.146881	7.10949		0.146881	7.07646		0.146881	7.09778		0.146881	7.08462		0.146881	7.01715		0.146881	7.04401		0.146881	7.02212		0.146881	7.06946		0.146881	7.12669		0.146881
	0.147961	7.12743		0.147961	7.11228		0.197281	7.07887		0.147961	7.12622		0.147961	7.19677		0.147961	7.09034		0.147961	7.12278		0.147961	7.11511		0.147961	7.08134		0.147961	7.10177		0.147961	7.07554		0.147961	7.01812		0.147961	7.04824		0.147961	7.01547		0.147961	7.07274		0.147961	7.12192		0.147961
	0.149041	7.12407		0.149041	7.1157		0.198721	7.07549		0.149041	7.13424		0.149041	7.19345		0.149041	7.08857		0.149041	7.12913		0.149041	7.12012		0.149041	7.08481		0.149041	7.10424		0.149041	7.06761		0.149041	7.01695		0.149041	7.05378		0.149041	7.0083		0.149041	7.07492		0.149041	7.11795		0.149041
	0.150121	7.12168		0.150121	7.12091		0.200161	7.07382		0.150121	7.14502		0.150121	7.18983		0.150121	7.08532		0.150121	7.13574		0.150121	7.12444		0.150121	7.08687		0.150121	7.10488		0.150121	7.06154		0.150121	7.0142		0.150121	7.06055		0.150121	7.00142		0.150121	7.07565		0.150121	7.11494		0.150121
	0.151201	7.12095		0.151201	7.12682		0.201601	7.07371		0.151201	7.15741		0.151201	7.18656		0.151201	7.08047		0.151201	7.1421		0.151201	7.12817		0.151201	7.08761		0.151201	7.10384		0.151201	7.05757		0.151201	7.01082		0.151201	7.06809		0.151201	6.99568		0.151201	7.0748		0.151201	7.1129		0.151201
	0.152281	7.12225		0.152281	7.13244		0.203041	7.07488		0.152281	7.1701		0.152281	7.18403		0.152281	7.07454		0.152281	7.14766		0.152281	7.13146		0.152281	7.08703		0.152281	7.10149		0.152281	7.05569		0.152281	7.00758		0.152281	7.07568		0.152281	6.99191		0.152281	7.0722		0.152281	7.11179		0.152281
	0.153361	7.12557		0.153361	7.13714		0.204481	7.07713		0.153361	7.18198		0.153361	7.18238		0.153361	7.06853		0.153361	7.15185		0.153361	7.13448		0.153361	7.08516		0.153361	7.0983		0.153361	7.05554		0.153361	7.00498		0.153361	7.08255		0.153361	6.99074		0.153361	7.06781		0.153361	7.11147		0.153361
	0.154441	7.13059		0.154441	7.14062		0.205921	7.0802		0.154441	7.19212		0.154441	7.18155		0.154441	7.06379		0.154441	7.15411		0.154441	7.13755		0.154441	7.082		0.154441	7.09481		0.154441	7.05625		0.154441	7.00335		0.154441	7.08789		0.154441	6.99242		0.154441	7.0618		0.154441	7.11178		0.154441
	0.155521	7.13648		0.155521	7.14266		0.207361	7.08361		0.155521	7.19983		0.155521	7.18124		0.155521	7.06151		0.155521	7.15411		0.155521	7.14107		0.155521	7.07766		0.155521	7.09165		0.155521	7.0567		0.155521	7.00303		0.155521	7.091		0.155521	6.99668		0.155521	7.05459		0.155521	7.11241		0.155521
	0.156601	7.14209		0.156601	7.14315		0.208801	7.08671		0.156601	7.20468		0.156601	7.18097		0.156601	7.06245		0.156601	7.15185		0.156601	7.14519		0.156601	7.07236		0.156601	7.08951		0.156601	7.05597		0.156601	7.00427		0.156601	7.09149		0.156601	7.00293		0.156601	7.04677		0.156601	7.11291		0.156601
	0.157681	7.14614		0.157681	7.14225		0.210241	7.089		0.157681	7.2065		0.157681	7.18027		0.157681	7.06677		0.157681	7.14774		0.157681	7.1495		0.157681	7.06642		0.157681	7.08882		0.157681	7.05376		0.157681	7.00692		0.157681	7.0895		0.157681	7.01044		0.157681	7.03893		0.157681	7.1128		0.157681
	0.158761	7.14758		0.158761	7.14042		0.211681	7.0905		0.158761	7.20546		0.158761	7.1788		0.158761	7.074		0.158761	7.14236		0.158761	7.15321		0.158761	7.06037		0.158761	7.08953		0.158761	7.05037		0.158761	7.01048		0.158761	7.08578		0.158761	7.01837		0.158761	7.0315		0.158761	7.11168		0.158761
	0.159841	7.14592		0.159841	7.13819		0.213121	7.09155		0.159841	7.20208		0.159841	7.17643		0.159841	7.08303		0.159841	7.13633		0.159841	7.15572		0.159841	7.05486		0.159841	7.09108		0.159841	7.04646		0.159841	7.01419		0.159841	7.08137		0.159841	7.02598		0.159841	7.02492		0.159841	7.10937		0.159841
	0.160921	7.14141		0.160921	7.13593		0.214561	7.09256		0.160921	7.19724		0.160921	7.17317		0.160921	7.09242		0.160921	7.13021		0.160921	7.15681		0.160921	7.05061		0.160921	7.09269		0.160921	7.04268		0.160921	7.01749		0.160921	7.0771		0.160921	7.03275		0.160921	7.01963		0.160921	7.10602		0.160921
	0.162001	7.13496		0.162001	7.13383		0.216001	7.09372		0.162001	7.19206		0.162001	7.16897		0.162001	7.10064		0.162001	7.12448		0.162001	7.15653		0.162001	7.04824		0.162001	7.0938		0.162001	7.03959		0.162001	7.02004		0.162001	7.07346		0.162001	7.03857		0.162001	7.01588		0.162001	7.10213		0.162001
	0.163081	7.12783		0.163081	7.13212		0.217441	7.09509		0.163081	7.18773		0.163081	7.16381		0.163081	7.10657		0.163081	7.11943		0.163081	7.15491		0.163081	7.04806		0.163081	7.09413		0.163081	7.03767		0.163081	7.02157		0.163081	7.07051		0.163081	7.04362		0.163081	7.01363		0.163081	7.0984		0.163081
	0.164161	7.12141		0.164161	7.13119		0.218881	7.09678		0.164161	7.18523		0.164161	7.15774		0.164161	7.1097		0.164161	7.11517		0.164161	7.15187		0.164161	7.05006		0.164161	7.09363		0.164161	7.03721		0.164161	7.02179		0.164161	7.06809		0.164161	7.04812		0.164161	7.01248		0.164161	7.09539		0.164161
	0.165241	7.11688		0.165241	7.13148		0.220321	7.09889		0.165241	7.18514		0.165241	7.15111		0.165241	7.11013		0.165241	7.1117		0.165241	7.1476		0.165241	7.05391		0.165241	7.09242		0.165241	7.03817		0.165241	7.02032		0.165241	7.06587		0.165241	7.05217		0.165241	7.0119		0.165241	7.09333		0.165241
	0.166321	7.11513		0.166321	7.13324		0.221761	7.10117		0.166321	7.18751		0.166321	7.14452		0.166321	7.10844		0.166321	7.10903		0.166321	7.14267		0.166321	7.05914		0.166321	7.09086		0.166321	7.04025		0.166321	7.01694		0.166321	7.0634		0.166321	7.05584		0.166321	7.0114		0.166321	7.09204		0.166321
	0.167401	7.11641		0.167401	7.13636		0.223201	7.10296		0.167401	7.19181		0.167401	7.1385		0.167401	7.10542		0.167401	7.10713		0.167401	7.13788		0.167401	7.06521		0.167401	7.08953		0.167401	7.04299		0.167401	7.01166		0.167401	7.06029		0.167401	7.05921		0.167401	7.01052		0.167401	7.09112		0.167401
	0.168481	7.12029		0.168481	7.14051		0.224641	7.10344		0.168481	7.19697		0.168481	7.13344		0.168481	7.10189		0.168481	7.10583		0.168481	7.13376		0.168481	7.07158		0.168481	7.08911		0.168481	7.04604		0.168481	7.00479		0.168481	7.05646		0.168481	7.06226		0.168481	7.00894		0.168481	7.09017		0.168481
	0.169561	7.12581		0.169561	7.14525		0.226081	7.10212		0.169561	7.20153		0.169561	7.12965		0.169561	7.09854		0.169561	7.10482		0.169561	7.1305		0.169561	7.07768		0.169561	7.08987		0.169561	7.04929		0.169561	6.99688		0.169561	7.05233		0.169561	7.06471		0.169561	7.0066		0.169561	7.08871		0.169561
	0.170641	7.13167		0.170641	7.15015		0.227521	7.09908		0.170641	7.204		0.170641	7.12755		0.170641	7.0957		0.170641	7.10379		0.170641	7.12802		0.170641	7.08291		0.170641	7.09152		0.170641	7.05271		0.170641	6.98864		0.170641	7.04855		0.170641	7.06604		0.170641	7.0038		0.170641	7.08628		0.170641
	0.171721	7.13669		0.171721	7.15465		0.228961	7.09484		0.171721	7.20317		0.171721	7.12753		0.171721	7.09333		0.171721	7.10271		0.171721	7.12636		0.171721	7.08659		0.171721	7.09331		0.171721	7.05633		0.171721	6.98085		0.171721	7.04576		0.171721	7.06578		0.171721	7.00116		0.171721	7.08261		0.171721
	0.172801	7.13994		0.172801	7.15815		0.230401	7.09008		0.172801	7.19848		0.172801	7.12963		0.172801	7.0912		0.172801	7.10181		0.172801	7.12561		0.172801	7.08815		0.172801	7.09444		0.172801	7.06009		0.172801	6.97426		0.172801	7.04434		0.172801	7.0638		0.172801	6.99941		0.172801	7.0779		0.172801
	0.173881	7.14098		0.173881	7.1601		0.231841	7.08562		0.173881	7.19003		0.173881	7.1333		0.173881	7.08903		0.173881	7.10138		0.173881	7.12579		0.173881	7.0872		0.173881	7.09436		0.173881	7.06384		0.173881	6.96939		0.173881	7.04446		0.173881	7.06027		0.173881	6.99916		0.173881	7.07293		0.173881
	0.174961	7.13985		0.174961	7.16025		0.233281	7.08249		0.174961	7.17861		0.174961	7.13768		0.174961	7.08664		0.174961	7.10148		0.174961	7.12669		0.174961	7.08368		0.174961	7.09286		0.174961	7.06727		0.174961	6.96653		0.174961	7.0462		0.174961	7.05539		0.174961	7.00083		0.174961	7.06884		0.174961
	0.176041	7.13708		0.176041	7.1587		0.234722	7.08171		0.176041	7.1656		0.176041	7.14199		0.176041	7.08407		0.176041	7.10203		0.176041	7.128		0.176041	7.0778		0.176041	7.08983		0.176041	7.07002		0.176041	6.96577		0.176041	7.04955		0.176041	7.04931		0.176041	7.0047		0.176041	7.06666		0.176041
	0.177121	7.1334		0.177121	7.15579		0.236162	7.08393		0.177121	7.15271		0.177121	7.14583		0.177121	7.08159		0.177121	7.10293		0.177121	7.12952		0.177121	7.07001		0.177121	7.08548		0.177121	7.0717		0.177121	6.96704		0.177121	7.05435		0.177121	7.04227		0.177121	7.01087		0.177121	7.06705		0.177121
	0.178201	7.12953		0.178201	7.15189		0.237602	7.08895		0.178201	7.14155		0.178201	7.14913		0.178201	7.07973		0.178201	7.10431		0.178201	7.13125		0.178201	7.06094		0.178201	7.08036		0.178201	7.07209		0.178201	6.9701		0.178201	7.06031		0.178201	7.03482		0.178201	7.01911		0.178201	7.07026		0.178201
	0.179281	7.12596		0.179281	7.14734		0.239042	7.09584		0.179281	7.13329		0.179281	7.15206		0.179281	7.07912		0.179281	7.10621		0.179281	7.13322		0.179281	7.05139		0.179281	7.07543		0.179281	7.07117		0.179281	6.97446		0.179281	7.0671		0.179281	7.02791		0.179281	7.02883		0.179281	7.07619		0.179281
	0.180361	7.12289		0.180361	7.14246		0.240482	7.10344		0.180361	7.12843		0.180361	7.155		0.180361	7.08029		0.180361	7.10832		0.180361	7.13527		0.180361	7.04219		0.180361	7.07163		0.180361	7.06907		0.180361	6.97953		0.180361	7.0744		0.180361	7.02254		0.180361	7.03919		0.180361	7.08436		0.180361
	0.181441	7.12044		0.181441	7.13758		0.241922	7.11067		0.181441	7.12692		0.181441	7.15847		0.181441	7.0834		0.181441	7.1099		0.181441	7.13718		0.181441	7.03397		0.181441	7.06947		0.181441	7.06606		0.181441	6.98472		0.181441	7.08191		0.181441	7.01934		0.181441	7.04931		0.181441	7.09391		0.181441
	0.182521	7.11862		0.182521	7.13307		0.243362	7.11685		0.182521	7.12841		0.182521	7.16295		0.182521	7.08821		0.182521	7.11013		0.182521	7.13875		0.182521	7.0271		0.182521	7.06894		0.182521	7.06247		0.182521	6.98966		0.182521	7.0892		0.182521	7.01864		0.182521	7.05844		0.182521	7.10369		0.182521
	0.183601	7.11737		0.183601	7.12919		0.244802	7.12154		0.183601	7.13226		0.183601	7.16865		0.183601	7.09418		0.183601	7.10852		0.183601	7.13999		0.183601	7.02165		0.183601	7.06972		0.183601	7.05869		0.183601	6.99412		0.183601	7.09572		0.183601	7.0206		0.183601	7.06586		0.183601	7.11253		0.183601
	0.184681	7.11654		0.184681	7.12616		0.246242	7.12457		0.184681	7.1377		0.184681	7.1753		0.184681	7.10068		0.184681	7.10516		0.184681	7.14108		0.184681	7.01749		0.184681	7.07135		0.184681	7.05507		0.184681	6.9979		0.184681	7.10081		0.184681	7.0255		0.184681	7.07089		0.184681	7.11954		0.184681
	0.185761	7.11604		0.185761	7.12412		0.247682	7.12619		0.185761	7.14391		0.185761	7.1822		0.185761	7.10708		0.185761	7.10048		0.185761	7.14207		0.185761	7.01444		0.185761	7.07338		0.185761	7.05192		0.185761	7.0007		0.185761	7.10385		0.185761	7.03346		0.185761	7.07303		0.185761	7.12422		0.185761
	0.186841	7.1159		0.186841	7.12327		0.249122	7.12697		0.186841	7.15024		0.186841	7.18844		0.186841	7.11274		0.186841	7.09503		0.186841	7.14291		0.186841	7.01237		0.186841	7.07539		0.186841	7.04941		0.186841	7.00224		0.186841	7.10445		0.186841	7.04412		0.186841	7.07207		0.186841	7.12646		0.186841
	0.187921	7.11634		0.187921	7.12384		0.250562	7.12766		0.187921	7.15629		0.187921	7.19292		0.187921	7.11709		0.187921	7.08942		0.187921	7.14349		0.187921	7.01132		0.187921	7.07707		0.187921	7.04752		0.187921	7.00259		0.187921	7.10263		0.187921	7.05634		0.187921	7.06832		0.187921	7.12652		0.187921
	0.189001	7.11762		0.189001	7.12598		0.252002	7.12867		0.189001	7.16175		0.189001	7.19472		0.189001	7.11983		0.189001	7.08441		0.189001	7.1438		0.189001	7.01151		0.189001	7.07837		0.189001	7.04613		0.189001	7.00219		0.189001	7.09872		0.189001	7.06856		0.189001	7.06252		0.189001	7.12497		0.189001
	0.190081	7.11982		0.190081	7.12961		0.253442	7.12997		0.190081	7.16627		0.190081	7.1933		0.190081	7.12101		0.190081	7.08084		0.190081	7.1439		0.190081	7.01324		0.190081	7.07946		0.190081	7.04507		0.190081	7.00174		0.190081	7.09326		0.190081	7.07924		0.190081	7.05566		0.190081	7.12259		0.190081
	0.191161	7.12272		0.191161	7.13435		0.254882	7.13121		0.191161	7.1693		0.191161	7.18864		0.191161	7.1211		0.191161	7.07948		0.191161	7.14381		0.191161	7.01675		0.191161	7.08064		0.191161	7.04438		0.191161	7.00181		0.191161	7.08677		0.191161	7.08717		0.191161	7.04871		0.191161	7.12022		0.191161
	0.192241	7.12586		0.192241	7.13956		0.256322	7.13209		0.192241	7.1703		0.192241	7.18132		0.192241	7.12078		0.192241	7.08051		0.192241	7.14348		0.192241	7.02196		0.192241	7.08209		0.192241	7.04432		0.192241	7.00279		0.192241	7.07968		0.192241	7.09156		0.192241	7.04247		0.192241	7.11852		0.192241
	0.193321	7.12867		0.193321	7.14452		0.257762	7.13266		0.193321	7.16894		0.193321	7.17232		0.193321	7.12056		0.193321	7.08339		0.193321	7.14284		0.193321	7.02846		0.193321	7.08386		0.193321	7.04523		0.193321	7.0048		0.193321	7.07235		0.193321	7.09191		0.193321	7.0375		0.193321	7.11795		0.193321
	0.194401	7.13063		0.194401	7.14855		0.259202	7.13322		0.194401	7.16519		0.194401	7.16288		0.194401	7.12068		0.194401	7.08713		0.194401	7.14199		0.194401	7.03548		0.194401	7.08591		0.194401	7.04731		0.194401	7.00779		0.194401	7.06507		0.194401	7.0881		0.194401	7.03413		0.194401	7.11875		0.194401
	0.195481	7.13136		0.195481	7.15114		0.260642	7.13413		0.195481	7.15934		0.195481	7.15425		0.195481	7.12107		0.195481	7.09072		0.195481	7.14115		0.195481	7.04218		0.195481	7.0881		0.195481	7.05069		0.195481	7.0116		0.195481	7.05804		0.195481	7.08069		0.195481	7.03236		0.195481	7.12087		0.195481
	0.196561	7.13058		0.196561	7.15194		0.262082	7.13562		0.196561	7.15198		0.196561	7.14743		0.196561	7.1215		0.196561	7.09335		0.196561	7.14043		0.196561	7.04768		0.196561	7.09024		0.196561	7.05545		0.196561	7.01588		0.196561	7.05147		0.196561	7.07091		0.196561	7.03186		0.196561	7.12399		0.196561
	0.197641	7.12822		0.197641	7.15085		0.263522	7.13772		0.197641	7.14394		0.197641	7.14301		0.197641	7.12164		0.197641	7.09445		0.197641	7.13977		0.197641	7.0513		0.197641	7.09204		0.197641	7.06159		0.197641	7.02019		0.197641	7.04557		0.197641	7.06029		0.197641	7.03199		0.197641	7.12749		0.197641
	0.198721	7.12443		0.198721	7.1481		0.264962	7.14042		0.198721	7.13626		0.198721	7.14116		0.198721	7.12104		0.198721	7.0937		0.198721	7.1389		0.198721	7.0526		0.198721	7.09316		0.198721	7.06869		0.198721	7.02401		0.198721	7.04063		0.198721	7.05025		0.198721	7.03196		0.198721	7.13048		0.198721
	0.199801	7.11966		0.199801	7.14434		0.266402	7.14346		0.199801	7.12988		0.199801	7.14177		0.199801	7.1191		0.199801	7.09102		0.199801	7.13746		0.199801	7.05157		0.199801	7.09338		0.199801	7.07573		0.199801	7.02707		0.199801	7.037		0.199801	7.04179		0.199801	7.03121		0.199801	7.13199		0.199801
	0.200881	7.11459		0.200881	7.14046		0.267842	7.14632		0.200881	7.1255		0.200881	7.14455		0.200881	7.1153		0.200881	7.08683		0.200881	7.13524		0.200881	7.04872		0.200881	7.09281		0.200881	7.08138		0.200881	7.02935		0.200881	7.0351		0.200881	7.03545		0.200881	7.0295		0.200881	7.13124		0.200881
	0.201961	7.10989		0.201961	7.13729		0.269282	7.14818		0.201961	7.12336		0.201961	7.14893		0.201961	7.10951		0.201961	7.08196		0.201961	7.13213		0.201961	7.04493		0.201961	7.09189		0.201961	7.0846		0.201961	7.03117		0.201961	7.03521		0.201961	7.03131		0.201961	7.02701		0.201961	7.12789		0.201961
	0.203041	7.10605		0.203041	7.1353		0.270722	7.14812		0.203041	7.12339		0.203041	7.15412		0.203041	7.10223		0.203041	7.07734		0.203041	7.12819		0.203041	7.0412		0.203041	7.09117		0.203041	7.08507		0.203041	7.03291		0.203041	7.03729		0.203041	7.02893		0.203041	7.02415		0.203041	7.12203		0.203041
	0.204121	7.10325		0.204121	7.1346		0.272162	7.14561		0.204121	7.12531		0.204121	7.15923		0.204121	7.09447		0.204121	7.07362		0.204121	7.12359		0.204121	7.03835		0.204121	7.09104		0.204121	7.08315		0.204121	7.03492		0.204121	7.04096		0.204121	7.02752		0.204121	7.02142		0.204121	7.1142		0.204121
	0.205201	7.10147		0.205201	7.13503		0.273602	7.14083		0.205201	7.12864		0.205201	7.16358		0.205201	7.08744		0.205201	7.07108		0.205201	7.11873		0.205201	7.03691		0.205201	7.09166		0.205201	7.07963		0.205201	7.03725		0.205201	7.04542		0.205201	7.02636		0.205201	7.01917		0.205201	7.10518		0.205201
	0.206281	7.10068		0.206281	7.1363		0.275042	7.1346		0.206281	7.13279		0.206281	7.16685		0.206281	7.08228		0.206281	7.06968		0.206281	7.11423		0.206281	7.03716		0.206281	7.09307		0.206281	7.07538		0.206281	7.03974		0.206281	7.04978		0.206281	7.0251		0.206281	7.01749		0.206281	7.09603		0.206281
	0.207361	7.10081		0.207361	7.13811		0.276482	7.12801		0.207361	7.13714		0.207361	7.16889		0.207361	7.07982		0.207361	7.06942		0.207361	7.11069		0.207361	7.03919		0.207361	7.09527		0.207361	7.07139		0.207361	7.04212		0.207361	7.05329		0.207361	7.02385		0.207361	7.01612		0.207361	7.08788		0.207361
	0.208441	7.10183		0.208441	7.14006		0.277922	7.12208		0.208441	7.14124		0.208441	7.16965		0.208441	7.08048		0.208441	7.07025		0.208441	7.10847		0.208441	7.04278		0.208441	7.09816		0.208441	7.06876		0.208441	7.04418		0.208441	7.05555		0.208441	7.02284		0.208441	7.01461		0.208441	7.08167		0.208441
	0.209521	7.10368		0.209521	7.14171		0.279362	7.1176		0.209521	7.14485		0.209521	7.16913		0.209521	7.08425		0.209521	7.07213		0.209521	7.10743		0.209521	7.04741		0.209521	7.10132		0.209521	7.06845		0.209521	7.04578		0.209521	7.05645		0.209521	7.02219		0.209521	7.01259		0.209521	7.07792		0.209521
	0.210601	7.10638		0.210601	7.14282		0.280802	7.11519		0.210601	7.14783		0.210601	7.16754		0.210601	7.0905		0.210601	7.07483		0.210601	7.10702		0.210601	7.05237		0.210601	7.10405		0.210601	7.07084		0.210601	7.04676		0.210601	7.05622		0.210601	7.02202		0.210601	7.00971		0.210601	7.07665		0.210601
	0.211681	7.10999		0.211681	7.14344		0.282242	7.11531		0.211681	7.1501		0.211681	7.16532		0.211681	7.09804		0.211681	7.07812		0.211681	7.10657		0.211681	7.05696		0.211681	7.10568		0.211681	7.0755		0.211681	7.04704		0.211681	7.05527		0.211681	7.02264		0.211681	7.0058		0.211681	7.07741		0.211681
	0.212761	7.11456		0.212761	7.14374		0.283682	7.11807		0.212761	7.1516		0.212761	7.16302		0.212761	7.10542		0.212761	7.08193		0.212761	7.10543		0.212761	7.06062		0.212761	7.10587		0.212761	7.08136		0.212761	7.04658		0.212761	7.05401		0.212761	7.02433		0.212761	7.00083		0.212761	7.07955		0.212761
	0.213841	7.11989		0.213841	7.14393		0.285122	7.12301		0.213841	7.15239		0.213841	7.16108		0.213841	7.1113		0.213841	7.08656		0.213841	7.1032		0.213841	7.06298		0.213841	7.10471		0.213841	7.08736		0.213841	7.04545		0.213841	7.05295		0.213841	7.02701		0.213841	6.99522		0.213841	7.08228		0.213841
	0.214921	7.12544		0.214921	7.14412		0.286562	7.12923		0.214921	7.15265		0.214921	7.15974		0.214921	7.1148		0.214921	7.09228		0.214921	7.09978		0.214921	7.06376		0.214921	7.1025		0.214921	7.09287		0.214921	7.04379		0.214921	7.05261		0.214921	7.03003		0.214921	6.99		0.214921	7.08486		0.214921
	0.216001	7.13043		0.216001	7.14433		0.288002	7.13572		0.216001	7.15261		0.216001	7.15904		0.216001	7.11559		0.216001	7.09903		0.216001	7.09545		0.216001	7.06283		0.216001	7.09952		0.216001	7.09774		0.216001	7.04168		0.216001	7.05346		0.216001	7.03261		0.216001	6.98653		0.216001	7.08685		0.216001
	0.217081	7.13404		0.217081	7.14465		0.289442	7.14172		0.217081	7.1525		0.217081	7.1589		0.217081	7.11379		0.217081	7.10618		0.217081	7.09095		0.217081	7.06034		0.217081	7.09608		0.217081	7.10201		0.217081	7.03912		0.217081	7.05575		0.217081	7.03433		0.217081	6.9859		0.217081	7.08814		0.217081
	0.218161	7.13563		0.218161	7.1451		0.290882	7.14673		0.218161	7.15252		0.218161	7.15919		0.218161	7.10992		0.218161	7.11281		0.218161	7.0872		0.218161	7.05673		0.218161	7.09264		0.218161	7.1057		0.218161	7.03592		0.218161	7.05934		0.218161	7.03532		0.218161	6.98848		0.218161	7.08892		0.218161
	0.219241	7.13493		0.219241	7.14565		0.292322	7.15032		0.219241	7.15287		0.219241	7.15971		0.219241	7.10477		0.219241	7.11813		0.219241	7.08506		0.219241	7.05265		0.219241	7.08973		0.219241	7.10892		0.219241	7.03189		0.219241	7.06376		0.219241	7.03594		0.219241	6.99391		0.219241	7.08958		0.219241
	0.220321	7.13213		0.220321	7.14618		0.293762	7.15197		0.220321	7.15377		0.220321	7.16037		0.220321	7.09918		0.220321	7.12169		0.220321	7.08497		0.220321	7.04868		0.220321	7.08762		0.220321	7.11196		0.220321	7.02693		0.220321	7.06844		0.220321	7.03627		0.220321	7.00155		0.220321	7.09051		0.220321
	0.221401	7.12793		0.221401	7.14658		0.295202	7.15126		0.221401	7.15528		0.221401	7.16118		0.221401	7.09395		0.221401	7.12322		0.221401	7.08698		0.221401	7.04522		0.221401	7.08632		0.221401	7.11517		0.221401	7.02116		0.221401	7.073		0.221401	7.03618		0.221401	7.01058		0.221401	7.09194		0.221401
	0.222481	7.12341		0.222481	7.14683		0.296642	7.1482		0.222481	7.15735		0.222481	7.16207		0.222481	7.08956		0.222481	7.12251		0.222481	7.09076		0.222481	7.04272		0.222481	7.08565		0.222481	7.11861		0.222481	7.01485		0.222481	7.07704		0.222481	7.03561		0.222481	7.02004		0.222481	7.09392		0.222481
	0.223561	7.11969		0.223561	7.14701		0.298082	7.14331		0.223561	7.15972		0.223561	7.16274		0.223561	7.0861		0.223561	7.11965		0.223561	7.09577		0.223561	7.04171		0.223561	7.08554		0.223561	7.1219		0.223561	7.00836		0.223561	7.08001		0.223561	7.03477		0.223561	7.02866		0.223561	7.09633		0.223561
	0.224641	7.11774		0.224641	7.14726		0.299522	7.13739		0.224641	7.16212		0.224641	7.16274		0.224641	7.08336		0.224641	7.11528		0.224641	7.1013		0.224641	7.04262		0.224641	7.08609		0.224641	7.12436		0.224641	7.00207		0.224641	7.0811		0.224641	7.03397		0.224641	7.03521		0.224641	7.09889		0.224641
	0.225721	7.1182		0.225721	7.14775		0.300962	7.13115		0.225721	7.16434		0.225721	7.16168		0.225721	7.08095		0.225721	7.11064		0.225721	7.10654		0.225721	7.04551		0.225721	7.08744		0.225721	7.12543		0.225721	6.99643		0.225721	7.07952		0.225721	7.03344		0.225721	7.03888		0.225721	7.10133		0.225721
	0.226801	7.12122		0.226801	7.14866		0.302402	7.12502		0.226801	7.1662		0.226801	7.15947		0.226801	7.07852		0.226801	7.10702		0.226801	7.11086		0.226801	7.05002		0.226801	7.08958		0.226801	7.12479		0.226801	6.99193		0.226801	7.0749		0.226801	7.03313		0.226801	7.03967		0.226801	7.10343		0.226801
	0.227881	7.12645		0.227881	7.15015		0.303842	7.1192		0.227881	7.1676		0.227881	7.15627		0.227881	7.07586		0.227881	7.10518		0.227881	7.11397		0.227881	7.05562		0.227881	7.09236		0.227881	7.1223		0.227881	6.98902		0.227881	7.06763		0.227881	7.03296		0.227881	7.03817		0.227881	7.10501		0.227881
	0.228961	7.13295		0.228961	7.15232		0.305282	7.11383		0.228961	7.16849		0.228961	7.15221		0.228961	7.07288		0.228961	7.10514		0.228961	7.11592		0.228961	7.06191		0.228961	7.09562		0.228961	7.11786		0.228961	6.98795		0.228961	7.05851		0.228961	7.03297		0.228961	7.03501		0.228961	7.10604		0.228961
	0.230041	7.13955		0.230041	7.15509		0.306722	7.10896		0.230041	7.16889		0.230041	7.14742		0.230041	7.06959		0.230041	7.10646		0.230041	7.11692		0.230041	7.06855		0.230041	7.09929		0.230041	7.11155		0.230041	6.98876		0.230041	7.0486		0.230041	7.03324		0.230041	7.03066		0.230041	7.10669		0.230041
	0.231121	7.14523		0.231121	7.15818		0.308162	7.10443		0.231121	7.1689		0.231121	7.14222		0.231121	7.06611		0.231121	7.10856		0.231121	7.11719		0.231121	7.07507		0.231121	7.10323		0.231121	7.10368		0.231121	6.99136		0.231121	7.0389		0.231121	7.0336		0.231121	7.02545		0.231121	7.1074		0.231121
	0.232201	7.14948		0.232201	7.16116		0.309602	7.09988		0.232201	7.16869		0.232201	7.13734		0.232201	7.06285		0.232201	7.11067		0.232201	7.11691		0.232201	7.08075		0.232201	7.10713		0.232201	7.09477		0.232201	6.99557		0.232201	7.03035		0.232201	7.03362		0.232201	7.01978		0.232201	7.10874		0.232201
	0.233281	7.1521		0.233281	7.16345		0.311042	7.09491		0.233281	7.16857		0.233281	7.13379		0.233281	7.06042		0.233281	7.11177		0.233281	7.1163		0.233281	7.08489		0.233281	7.11051		0.233281	7.0855		0.233281	7.00114		0.233281	7.02375		0.233281	7.0326		0.233281	7.01415		0.233281	7.11116		0.233281
	0.234361	7.15313		0.234361	7.16454		0.312482	7.08929		0.234361	7.16878		0.234361	7.13249		0.234361	7.05963		0.234361	7.11067		0.234361	7.11568		0.234361	7.08724		0.234361	7.11284		0.234361	7.07655		0.234361	7.00768		0.234361	7.01965		0.234361	7.03008		0.234361	7.00903		0.234361	7.11482		0.234361
	0.235442	7.15272		0.235442	7.16416		0.313922	7.08316		0.235442	7.1694		0.235442	7.13379		0.235442	7.06108		0.235442	7.10661		0.235442	7.11545		0.235442	7.08787		0.235442	7.11384		0.235442	7.06856		0.235442	7.01466		0.235442	7.01811		0.235442	7.026		0.235442	7.00464		0.235442	7.11964		0.235442
	0.236522	7.15127		0.236522	7.16233		0.315362	7.07683		0.236522	7.17025		0.236522	7.13762		0.236522	7.06505		0.236522	7.09976		0.236522	7.11593		0.236522	7.08696		0.236522	7.11348		0.236522	7.06207		0.236522	7.02159		0.236522	7.01861		0.236522	7.02077		0.236522	7.00114		0.236522	7.12537		0.236522
	0.237602	7.14945		0.237602	7.15931		0.316802	7.07064		0.237602	7.17101		0.237602	7.14359		0.237602	7.07152		0.237602	7.09116		0.237602	7.11713		0.237602	7.08453		0.237602	7.11196		0.237602	7.05733		0.237602	7.02808		0.237602	7.02035		0.237602	7.01497		0.237602	6.99873		0.237602	7.13162		0.237602
	0.238682	7.14794		0.238682	7.15534		0.318242	7.06475		0.238682	7.17134		0.238682	7.15113		0.238682	7.08036		0.238682	7.08226		0.238682	7.11871		0.238682	7.08052		0.238682	7.10961		0.238682	7.05436		0.238682	7.03378		0.238682	7.02255		0.238682	7.00931		0.238682	6.99768		0.238682	7.13773		0.238682
	0.239762	7.14708		0.239762	7.1506		0.319682	7.05929		0.239762	7.17114		0.239762	7.15948		0.239762	7.09124		0.239762	7.07441		0.239762	7.12011		0.239762	7.07519		0.239762	7.1068		0.239762	7.05305		0.239762	7.03847		0.239762	7.02472		0.239762	7.00458		0.239762	6.99819		0.239762	7.14284		0.239762
	0.240842	7.14678		0.240842	7.14531		0.321122	7.05454		0.240842	7.17035		0.240842	7.16772		0.240842	7.10358		0.240842	7.06871		0.240842	7.12073		0.240842	7.06909		0.240842	7.10399		0.240842	7.05315		0.240842	7.04207		0.240842	7.02682		0.240842	7.00169		0.240842	7.00025		0.240842	7.14599		0.240842
	0.241922	7.14679		0.241922	7.13981		0.322562	7.05103		0.241922	7.16878		0.241922	7.1748		0.241922	7.11643		0.241922	7.06603		0.241922	7.12004		0.241922	7.06284		0.241922	7.10172		0.241922	7.05443		0.241922	7.04462		0.241922	7.02895		0.241922	7.00149		0.241922	7.00361		0.241922	7.14656		0.241922
	0.243002	7.14693		0.243002	7.13444		0.324002	7.0494		0.243002	7.16614		0.243002	7.17981		0.243002	7.12872		0.243002	7.06688		0.243002	7.11762		0.243002	7.05689		0.243002	7.10044		0.243002	7.05662		0.243002	7.04628		0.243002	7.03136		0.243002	7.00438		0.243002	7.00796		0.243002	7.14441		0.243002
	0.244082	7.14714		0.244082	7.12922		0.325442	7.05007		0.244082	7.16239		0.244082	7.18211		0.244082	7.13959		0.244082	7.07113		0.244082	7.11312		0.244082	7.05137		0.244082	7.10037		0.244082	7.05947		0.244082	7.04713		0.244082	7.03415		0.244082	7.01019		0.244082	7.01297		0.244082	7.13987		0.244082
	0.245162	7.14731		0.245162	7.12393		0.326882	7.05315		0.245162	7.1579		0.245162	7.18145		0.245162	7.14859		0.245162	7.07781		0.245162	7.10648		0.245162	7.04631		0.245162	7.10135		0.245162	7.06292		0.245162	7.0472		0.245162	7.03718		0.245162	7.01817		0.245162	7.01832		0.245162	7.13352		0.245162
	0.246242	7.14712		0.246242	7.11848		0.328322	7.05856		0.246242	7.15335		0.246242	7.178		0.246242	7.15559		0.246242	7.08538		0.246242	7.0982		0.246242	7.04164		0.246242	7.10286		0.246242	7.06711		0.246242	7.04669		0.246242	7.04011		0.246242	7.02734		0.246242	7.02369		0.246242	7.12601		0.246242
	0.247322	7.14617		0.247322	7.11309		0.329762	7.06615		0.247322	7.14927		0.247322	7.17235		0.247322	7.16057		0.247322	7.09219		0.247322	7.08936		0.247322	7.03737		0.247322	7.10425		0.247322	7.07212		0.247322	7.04599		0.247322	7.0424		0.247322	7.03666		0.247322	7.02884		0.247322	7.11806		0.247322
	0.248402	7.14434		0.248402	7.10823		0.331202	7.07559		0.248402	7.14583		0.248402	7.16528		0.248402	7.16358		0.248402	7.0969		0.248402	7.08136		0.248402	7.0335		0.248402	7.10493		0.248402	7.07769		0.248402	7.04551		0.248402	7.0434		0.248402	7.04512		0.248402	7.03372		0.248402	7.11044		0.248402
	0.249482	7.14177		0.249482	7.10426		0.332642	7.08615		0.249482	7.14309		0.249482	7.15759		0.249482	7.16474		0.249482	7.09879		0.249482	7.07547		0.249482	7.03009		0.249482	7.10442		0.249482	7.08334		0.249482	7.04552		0.249482	7.04251		0.249482	7.05164		0.249482	7.03838		0.249482	7.10387		0.249482
	0.250562	7.13862		0.250562	7.10125		0.334082	7.09662		0.250562	7.1412		0.250562	7.14996		0.250562	7.16428		0.250562	7.0977		0.250562	7.07256		0.250562	7.02717		0.250562	7.10234		0.250562	7.08858		0.250562	7.04596		0.250562	7.03932		0.250562	7.0553		0.250562	7.04283		0.250562	7.09877		0.250562
	0.251642	7.13489		0.251642	7.09916		0.335522	7.10581		0.251642	7.14051		0.251642	7.14309		0.251642	7.16242		0.251642	7.09399		0.251642	7.07297		0.251642	7.02486		0.251642	7.09857		0.251642	7.09307		0.251642	7.04668		0.251642	7.0337		0.251642	7.05553		0.251642	7.04694		0.251642	7.09515		0.251642
	0.252722	7.13037		0.252722	7.09807		0.336962	7.11297		0.252722	7.14117		0.252722	7.13771		0.252722	7.15919		0.252722	7.08841		0.252722	7.07657		0.252722	7.02344		0.252722	7.09328		0.252722	7.09673		0.252722	7.04747		0.252722	7.02597		0.252722	7.05225		0.252722	7.05048		0.252722	7.0927		0.252722
	0.253802	7.12495		0.253802	7.09809		0.338402	7.11809		0.253802	7.14297		0.253802	7.13437		0.253802	7.15449		0.253802	7.08188		0.253802	7.08256		0.253802	7.02339		0.253802	7.08709		0.253802	7.09937		0.253802	7.04789		0.253802	7.01704		0.253802	7.04597		0.253802	7.05319		0.253802	7.09112		0.253802
	0.254882	7.11875		0.254882	7.09925		0.339842	7.12161		0.254882	7.14542		0.254882	7.13314		0.254882	7.14812		0.254882	7.07541		0.254882	7.08962		0.254882	7.02521		0.254882	7.08098		0.254882	7.10079		0.254882	7.04717		0.254882	7.00815		0.254882	7.0375		0.254882	7.05476		0.254882	7.09016		0.254882
	0.255962	7.11204		0.255962	7.10132		0.341282	7.12413		0.255962	7.1482		0.255962	7.13361		0.255962	7.14006		0.255962	7.06995		0.255962	7.09622		0.255962	7.02922		0.255962	7.07595		0.255962	7.10107		0.255962	7.04429		0.255962	7.00059		0.255962	7.02794		0.255962	7.05481		0.255962	7.08976		0.255962
	0.257042	7.10497		0.257042	7.10393		0.342722	7.12621		0.257042	7.15133		0.257042	7.13522		0.257042	7.1305		0.257042	7.06624		0.257042	7.10103		0.257042	7.03535		0.257042	7.07273		0.257042	7.10077		0.257042	7.03841		0.257042	6.99526		0.257042	7.01849		0.257042	7.05291		0.257042	7.0899		0.257042
	0.258122	7.09769		0.258122	7.10666		0.344162	7.12838		0.258122	7.15505		0.258122	7.13755		0.258122	7.11994		0.258122	7.06458		0.258122	7.10313		0.258122	7.04312		0.258122	7.07166		0.258122	7.10076		0.258122	7.02939		0.258122	6.99258		0.258122	7.01042		0.258122	7.04882		0.258122	7.09055		0.258122
	0.259202	7.09053		0.259202	7.10913		0.345602	7.13102		0.259202	7.15944		0.259202	7.14026		0.259202	7.10905		0.259202	7.06488		0.259202	7.10209		0.259202	7.05184		0.259202	7.07275		0.259202	7.10174		0.259202	7.01787		0.259202	6.99275		0.259202	7.00498		0.259202	7.04264		0.259202	7.09177		0.259202
	0.260282	7.08424		0.260282	7.11092		0.347042	7.13417		0.260282	7.16428		0.260282	7.14279		0.260282	7.09859		0.260282	7.06675		0.260282	7.09798		0.260282	7.06077		0.260282	7.07578		0.260282	7.10381		0.260282	7.00492		0.260282	6.99566		0.260282	7.00298		0.260282	7.03492		0.260282	7.09364		0.260282
	0.261362	7.07973		0.261362	7.11167		0.348482	7.13739		0.261362	7.16908		0.261362	7.14443		0.261362	7.08923		0.261362	7.0698		0.261362	7.09151		0.261362	7.06916		0.261362	7.08038		0.261362	7.10655		0.261362	6.99181		0.261362	7.00093		0.261362	7.00465		0.261362	7.02646		0.261362	7.09623		0.261362
	0.262442	7.07763		0.262442	7.1111		0.349922	7.13986		0.262442	7.17326		0.262442	7.14454		0.262442	7.08153		0.262442	7.07379		0.262442	7.08396		0.262442	7.07638		0.262442	7.08606		0.262442	7.10948		0.262442	6.97982		0.262442	7.00772		0.262442	7.00945		0.262442	7.01827		0.262442	7.09952		0.262442
	0.263522	7.07818		0.263522	7.10921		0.351362	7.1408		0.263522	7.17629		0.263522	7.14302		0.263522	7.07596		0.263522	7.0785		0.263522	7.07688		0.263522	7.08182		0.263522	7.09219		0.263522	7.11222		0.263522	6.97024		0.263522	7.0149		0.263522	7.01633		0.263522	7.01138		0.263522	7.10339		0.263522
	0.264602	7.08129		0.264602	7.10629		0.352802	7.13975		0.264602	7.17759		0.264602	7.14027		0.264602	7.07279		0.264602	7.0836		0.264602	7.07155		0.264602	7.0851		0.264602	7.09817		0.264602	7.11438		0.264602	6.96424		0.264602	7.02148		0.264602	7.02402		0.264602	7.00663		0.264602	7.10762		0.264602
	0.265682	7.08681		0.265682	7.10299		0.354242	7.1367		0.265682	7.17658		0.265682	7.13686		0.265682	7.07201		0.265682	7.0887		0.265682	7.06878		0.265682	7.08616		0.265682	7.10365		0.265682	7.11538		0.265682	6.96251		0.265682	7.02688		0.265682	7.03135		0.265682	7.00458		0.265682	7.11185		0.265682
	0.266762	7.09431		0.266762	7.10025		0.355682	7.13215		0.266762	7.17285		0.266762	7.13323		0.266762	7.0733		0.266762	7.0934		0.266762	7.06891		0.266762	7.0853		0.266762	7.10859		0.266762	7.11449		0.266762	6.96497		0.266762	7.03085		0.266762	7.03724		0.266762	7.00526		0.266762	7.11563		0.266762
	0.267842	7.10292		0.267842	7.09907		0.357122	7.127		0.267842	7.16642		0.267842	7.12979		0.267842	7.07602		0.267842	7.09742		0.267842	7.07201		0.267842	7.08311		0.267842	7.11321		0.267842	7.11134		0.267842	6.97081		0.267842	7.03327		0.267842	7.04079		0.267842	7.00814		0.267842	7.11842		0.267842
	0.268922	7.11141		0.268922	7.10024		0.358562	7.12234		0.268922	7.15808		0.268922	7.1271		0.268922	7.07949		0.268922	7.10058		0.268922	7.07791		0.268922	7.08027		0.268922	7.11759		0.268922	7.10626		0.268922	6.97886		0.268922	7.03402		0.268922	7.04157		0.268922	7.01222		0.268922	7.11974		0.268922
	0.270002	7.11867		0.270002	7.10405		0.360002	7.11914		0.270002	7.14929		0.270002	7.12586		0.270002	7.08319		0.270002	7.10267		0.270002	7.08618		0.270002	7.07742		0.270002	7.12146		0.270002	7.10019		0.270002	6.98801		0.270002	7.03313		0.270002	7.03982		0.270002	7.01625		0.270002	7.11927		0.270002
	0.271082	7.1241		0.271082	7.11027		0.361442	7.11793		0.271082	7.14173		0.271082	7.12656		0.271082	7.08677		0.271082	7.10356		0.271082	7.09608		0.271082	7.07507		0.271082	7.12429		0.271082	7.09428		0.271082	6.99733		0.271082	7.03099		0.271082	7.03648		0.271082	7.01902		0.271082	7.11681		0.271082
	0.272162	7.12762		0.272162	7.11806		0.362882	7.11864		0.272162	7.13683		0.272162	7.1292		0.272162	7.08996		0.272162	7.1032		0.272162	7.10679		0.272162	7.07362		0.272162	7.12557		0.272162	7.08944		0.272162	7.00605		0.272162	7.02815		0.272162	7.03276		0.272162	7.01959		0.272162	7.11245		0.272162
	0.273242	7.12938		0.273242	7.12618		0.364322	7.12084		0.273242	7.13547		0.273242	7.13338		0.273242	7.09258		0.273242	7.10162		0.273242	7.11762		0.273242	7.0733		0.273242	7.12494		0.273242	7.08627		0.273242	7.01343		0.273242	7.02517		0.273242	7.02975		0.273242	7.01763		0.273242	7.10663		0.273242
	0.274322	7.12962		0.274322	7.13331		0.365762	7.12382		0.274322	7.13781		0.274322	7.13858		0.274322	7.09459		0.274322	7.09891		0.274322	7.1281		0.274322	7.07406		0.274322	7.12219		0.274322	7.08517		0.274322	7.01885		0.274322	7.02245		0.274322	7.02809		0.274322	7.01344		0.274322	7.10009		0.274322
	0.275402	7.12879		0.275402	7.13834		0.367202	7.12676		0.275402	7.14341		0.275402	7.14447		0.275402	7.09636		0.275402	7.09531		0.275402	7.13786		0.275402	7.07564		0.275402	7.11716		0.275402	7.0863		0.275402	7.02187		0.275402	7.02037		0.275402	7.02819		0.275402	7.00794		0.275402	7.0938		0.275402
	0.276482	7.12751		0.276482	7.14065		0.368642	7.12888		0.276482	7.15126		0.276482	7.15088		0.276482	7.09846		0.276482	7.09118		0.276482	7.1466		0.276482	7.07768		0.276482	7.10986		0.276482	7.08944		0.276482	7.02233		0.276482	7.01932		0.276482	7.03026		0.276482	7.00238		0.276482	7.08861		0.276482
	0.277562	7.1264		0.277562	7.1403		0.370082	7.12965		0.277562	7.15982		0.277562	7.15767		0.277562	7.10151		0.277562	7.08709		0.277562	7.15391		0.277562	7.07979		0.277562	7.10058		0.277562	7.09394		0.277562	7.02029		0.277562	7.01964		0.277562	7.03419		0.277562	6.99801		0.277562	7.08515		0.277562
	0.278642	7.1256		0.278642	7.13786		0.371522	7.12908		0.278642	7.16732		0.278642	7.16459		0.278642	7.10586		0.278642	7.08366		0.278642	7.15952		0.278642	7.08169		0.278642	7.09012		0.278642	7.09876		0.278642	7.01597		0.278642	7.02144		0.278642	7.03942		0.278642	6.99578		0.278642	7.08379		0.278642
	0.279722	7.12481		0.279722	7.13432		0.372962	7.12773		0.279722	7.17227		0.279722	7.17139		0.279722	7.1115		0.279722	7.08138		0.279722	7.1633		0.279722	7.08326		0.279722	7.07955		0.279722	7.10288		0.279722	7.00969		0.279722	7.02463		0.279722	7.045		0.279722	6.99623		0.279722	7.08458		0.279722
	0.280802	7.12346		0.280802	7.13091		0.374402	7.12643		0.280802	7.17404		0.280802	7.17794		0.280802	7.1181		0.280802	7.08064		0.280802	7.16541		0.280802	7.08456		0.280802	7.07004		0.280802	7.10561		0.280802	7.00191		0.280802	7.02916		0.280802	7.05007		0.280802	6.99925		0.280802	7.08721		0.280802
	0.281882	7.12119		0.281882	7.12878		0.375842	7.12594		0.281882	7.17296		0.281882	7.18425		0.281882	7.12513		0.281882	7.08174		0.281882	7.16615		0.281882	7.08591		0.281882	7.0626		0.281882	7.10665		0.281882	6.99336		0.281882	7.03512		0.281882	7.0543		0.281882	7.00418		0.281882	7.091		0.281882
	0.282962	7.11784		0.282962	7.12872		0.377282	7.12678		0.282962	7.17005		0.282962	7.19039		0.282962	7.13191		0.282962	7.08474		0.282962	7.16585		0.282962	7.08771		0.282962	7.05801		0.282962	7.10603		0.282962	6.98491		0.282962	7.04256		0.282962	7.0578		0.282962	7.00998		0.282962	7.09507		0.282962
	0.284042	7.11335		0.284042	7.13089		0.378722	7.12925		0.284042	7.16648		0.284042	7.19641		0.284042	7.13763		0.284042	7.08928		0.284042	7.16483		0.284042	7.09022		0.284042	7.05668		0.284042	7.10406		0.284042	6.97743		0.284042	7.05128		0.284042	7.06072		0.284042	7.01553		0.284042	7.09863		0.284042
	0.285122	7.10784		0.285122	7.13478		0.380162	7.13346		0.285122	7.16331		0.285122	7.20217		0.285122	7.1415		0.285122	7.09447		0.285122	7.16336		0.285122	7.09339		0.285122	7.05858		0.285122	7.10115		0.285122	6.97153		0.285122	7.06083		0.285122	7.06302		0.285122	7.0199		0.285122	7.10108		0.285122
	0.286202	7.10161		0.286202	7.1395		0.381602	7.13927		0.286202	7.16134		0.286202	7.20726		0.286202	7.14292		0.286202	7.09915		0.286202	7.16178		0.286202	7.09682		0.286202	7.06329		0.286202	7.09781		0.286202	6.9675		0.286202	7.07068		0.286202	7.06453		0.286202	7.02259		0.286202	7.10204		0.286202
	0.287282	7.09526		0.287282	7.14403		0.383042	7.14626		0.287282	7.16114		0.287282	7.21114		0.287282	7.1417		0.287282	7.10232		0.287282	7.16037		0.287282	7.09997		0.287282	7.06997		0.287282	7.0944		0.287282	6.96541		0.287282	7.08041		0.287282	7.0653		0.287282	7.02353		0.287282	7.10131		0.287282
	0.288362	7.08957		0.288362	7.14751		0.384482	7.1538		0.288362	7.16286		0.288362	7.21331		0.288362	7.13813		0.288362	7.10339		0.288362	7.15913		0.288362	7.10227		0.288362	7.07752		0.288362	7.09128		0.288362	6.96518		0.288362	7.08955		0.288362	7.06553		0.288362	7.02311		0.288362	7.09893		0.288362
	0.289442	7.08516		0.289442	7.14939		0.385922	7.16121		0.289442	7.16615		0.289442	7.21361		0.289442	7.13281		0.289442	7.10214		0.289442	7.15786		0.289442	7.10325		0.289442	7.08475		0.289442	7.08875		0.289442	6.96669		0.289442	7.0975		0.289442	7.06522		0.289442	7.02203		0.289442	7.09543		0.289442
	0.290522	7.08247		0.290522	7.14948		0.387362	7.16804		0.290522	7.17033		0.290522	7.21217		0.290522	7.1265		0.290522	7.09856		0.290522	7.15624		0.290522	7.10259		0.290522	7.09057		0.290522	7.08707		0.290522	6.9697		0.290522	7.10359		0.290522	7.06411		0.290522	7.02105		0.290522	7.09175		0.290522
	0.291602	7.08174		0.291602	7.14799		0.388802	7.17412		0.291602	7.1746		0.291602	7.20915		0.291602	7.11988		0.291602	7.09299		0.291602	7.15411		0.291602	7.10016		0.291602	7.09423		0.291602	7.08644		0.291602	6.97398		0.291602	7.10745		0.291602	7.06188		0.291602	7.02071		0.291602	7.08906		0.291602
	0.292682	7.08314		0.292682	7.14544		0.390242	7.17936		0.292682	7.1785		0.292682	7.20476		0.292682	7.1134		0.292682	7.08634		0.292682	7.15163		0.292682	7.09619		0.292682	7.09551		0.292682	7.08684		0.292682	6.9793		0.292682	7.10918		0.292682	7.05856		0.292682	7.02124		0.292682	7.08833		0.292682
	0.293762	7.08669		0.293762	7.14267		0.391683	7.18364		0.293762	7.18192		0.293762	7.19943		0.293762	7.10733		0.293762	7.07987		0.293762	7.14913		0.293762	7.09116		0.293762	7.09463		0.293762	7.08807		0.293762	6.98565		0.293762	7.10917		0.293762	7.05462		0.293762	7.02267		0.293762	7.09009		0.293762
	0.294842	7.0922		0.294842	7.14056		0.393123	7.18684		0.294842	7.18495		0.294842	7.19399		0.294842	7.10174		0.294842	7.07477		0.294842	7.14709		0.294842	7.0857		0.294842	7.09227		0.294842	7.08976		0.294842	6.99303		0.294842	7.10794		0.294842	7.0507		0.294842	7.02487		0.294842	7.09432		0.294842
	0.295922	7.09917		0.295922	7.13984		0.394563	7.18898		0.295922	7.18766		0.295922	7.18945		0.295922	7.09659		0.295922	7.07172		0.295922	7.14604		0.295922	7.08043		0.295922	7.08935		0.295922	7.0915		0.295922	7.00125		0.295922	7.10586		0.295922	7.04728		0.295922	7.02753		0.295922	7.10061		0.295922
	0.297002	7.10688		0.297002	7.14089		0.396003	7.19034		0.297002	7.19004		0.297002	7.18647		0.297002	7.09184		0.297002	7.07085		0.297002	7.14647		0.297002	7.07578		0.297002	7.08681		0.297002	7.09266		0.297002	7.00976		0.297002	7.10316		0.297002	7.04455		0.297002	7.03013		0.297002	7.10816		0.297002
	0.298082	7.11446		0.298082	7.14356		0.397443	7.19139		0.298082	7.19203		0.298082	7.18492		0.298082	7.08751		0.298082	7.07192		0.298082	7.14877		0.298082	7.072		0.298082	7.08533		0.298082	7.09244		0.298082	7.01779		0.298082	7.09998		0.298082	7.04264		0.298082	7.03213		0.298082	7.11593		0.298082
	0.299162	7.12111		0.299162	7.14731		0.398883	7.19246		0.299162	7.19355		0.299162	7.18391		0.299162	7.08377		0.299162	7.07458		0.299162	7.15306		0.299162	7.06906		0.299162	7.08513		0.299162	7.0901		0.299162	7.02463		0.299162	7.09637		0.299162	7.04157		0.299162	7.03327		0.299162	7.1227		0.299162
	0.300242	7.12614		0.300242	7.15138		0.400323	7.19353		0.300242	7.19455		0.300242	7.18236		0.300242	7.08103		0.300242	7.07828		0.300242	7.15904		0.300242	7.06679		0.300242	7.08598		0.300242	7.08526		0.300242	7.02974		0.300242	7.09226		0.300242	7.04117		0.300242	7.03378		0.300242	7.12727		0.300242
	0.301322	7.12909		0.301322	7.15503		0.401763	7.19438		0.301322	7.1948		0.301322	7.17934		0.301322	7.07983		0.301322	7.08224		0.301322	7.16593		0.301322	7.0649		0.301322	7.08739		0.301322	7.07814		0.301322	7.03281		0.301322	7.08751		0.301322	7.04097		0.301322	7.03417		0.301322	7.12878		0.301322
	0.302402	7.12985		0.302402	7.15764		0.403203	7.19484		0.302402	7.19393		0.302402	7.17429		0.302402	7.08081		0.302402	7.08566		0.302402	7.17264		0.302402	7.06317		0.302402	7.08871		0.302402	7.06937		0.302402	7.03366		0.302402	7.0819		0.302402	7.04042		0.302402	7.0349		0.302402	7.12709		0.302402
	0.303482	7.12876		0.303482	7.15879		0.404643	7.19482		0.303482	7.19154		0.303482	7.16699		0.303482	7.08441		0.303482	7.08809		0.303482	7.17788		0.303482	7.06139		0.303482	7.08946		0.303482	7.0599		0.303482	7.0325		0.303482	7.07534		0.303482	7.0392		0.303482	7.03625		0.303482	7.12286		0.303482
	0.304562	7.12657		0.304562	7.15835		0.406083	7.19419		0.304562	7.18747		0.304562	7.15758		0.304562	7.09065		0.304562	7.08947		0.304562	7.18048		0.304562	7.05944		0.304562	7.08934		0.304562	7.05085		0.304562	7.02997		0.304562	7.06788		0.304562	7.03744		0.304562	7.03837		0.304562	7.11731		0.304562
	0.305642	7.12436		0.305642	7.15652		0.407523	7.19245		0.305642	7.18191		0.305642	7.1468		0.305642	7.0991		0.305642	7.08998		0.305642	7.1796		0.305642	7.05721		0.305642	7.08843		0.305642	7.04357		0.305642	7.02707		0.305642	7.05982		0.305642	7.03557		0.305642	7.04146		0.305642	7.11162		0.305642
	0.306722	7.12317		0.306722	7.15386		0.408963	7.18892		0.306722	7.17534		0.306722	7.13599		0.306722	7.10898		0.306722	7.08981		0.306722	7.17502		0.306722	7.05472		0.306722	7.08712		0.306722	7.03939		0.306722	7.02459		0.306722	7.05157		0.306722	7.03406		0.306722	7.04569		0.306722	7.10664		0.306722
	0.307802	7.12368		0.307802	7.15112		0.410403	7.18327		0.307802	7.16827		0.307802	7.12687		0.307802	7.11933		0.307802	7.08913		0.307802	7.16709		0.307802	7.05217		0.307802	7.08594		0.307802	7.03925		0.307802	7.02284		0.307802	7.04356		0.307802	7.03329		0.307802	7.05097		0.307802	7.10281		0.307802
	0.308882	7.12613		0.308882	7.14905		0.411843	7.17582		0.308882	7.16126		0.308882	7.12101		0.308882	7.12919		0.308882	7.08829		0.308882	7.1567		0.308882	7.04992		0.308882	7.08538		0.308882	7.04335		0.308882	7.02161		0.308882	7.03615		0.308882	7.0336		0.308882	7.05678		0.308882	7.10039		0.308882
	0.309962	7.13028		0.309962	7.14815		0.413283	7.16758		0.309962	7.15496		0.309962	7.11931		0.309962	7.13757		0.309962	7.08773		0.309962	7.14499		0.309962	7.04836		0.309962	7.08569		0.309962	7.05116		0.309962	7.0206		0.309962	7.02967		0.309962	7.03529		0.309962	7.06237		0.309962	7.0994		0.309962
	0.311042	7.1355		0.311042	7.14867		0.414723	7.15966		0.311042	7.1502		0.311042	7.12173		0.311042	7.14366		0.311042	7.08781		0.311042	7.13331		0.311042	7.04772		0.311042	7.08692		0.311042	7.06177		0.311042	7.01961		0.311042	7.02443		0.311042	7.03852		0.311042	7.06702		0.311042	7.09957		0.311042
	0.312122	7.14091		0.312122	7.15064		0.416163	7.1529		0.312122	7.14778		0.312122	7.12743		0.312122	7.14704		0.312122	7.08862		0.312122	7.12299		0.312122	7.04805		0.312122	7.08891		0.312122	7.07416		0.312122	7.01849		0.312122	7.02071		0.312122	7.04306		0.312122	7.07034		0.312122	7.10029		0.312122
	0.313202	7.14535		0.313202	7.15395		0.417603	7.14786		0.313202	7.14818		0.313202	7.13512		0.313202	7.1478		0.313202	7.09006		0.313202	7.11511		0.313202	7.0493		0.313202	7.09139		0.313202	7.08737		0.313202	7.017		0.313202	7.01866		0.313202	7.04826		0.313202	7.07222		0.313202	7.1009		0.313202
	0.314282	7.14767		0.314282	7.15832		0.419043	7.14511		0.314282	7.15138		0.314282	7.1434		0.314282	7.1466		0.314282	7.09202		0.314282	7.11033		0.314282	7.0514		0.314282	7.09407		0.314282	7.10037		0.314282	7.01493		0.314282	7.01836		0.314282	7.05337		0.314282	7.07262		0.314282	7.10115		0.314282
	0.315362	7.14703		0.315362	7.16334		0.420483	7.1452		0.315362	7.15697		0.315362	7.15088		0.315362	7.14431		0.315362	7.09444		0.315362	7.10875		0.315362	7.05426		0.315362	7.0967		0.315362	7.11227		0.315362	7.01246		0.315362	7.01976		0.315362	7.05801		0.315362	7.07148		0.315362	7.1012		0.315362
	0.316442	7.1432		0.316442	7.16846		0.421923	7.14832		0.316442	7.16434		0.316442	7.15647		0.316442	7.14169		0.316442	7.09709		0.316442	7.11001		0.316442	7.05762		0.316442	7.09928		0.316442	7.12249		0.316442	7.01022		0.316442	7.02257		0.316442	7.06222		0.316442	7.0688		0.316442	7.1014		0.316442
	0.317522	7.13651		0.317522	7.17302		0.423363	7.15395		0.317522	7.17275		0.317522	7.15953		0.317522	7.13916		0.317522	7.09956		0.317522	7.11343		0.317522	7.06112		0.317522	7.10197		0.317522	7.13096		0.317522	7.00896		0.317522	7.02624		0.317522	7.06631		0.317522	7.06478		0.317522	7.10202		0.317522
	0.318602	7.12763		0.318602	7.17637		0.424803	7.16094		0.318602	7.18141		0.318602	7.16014		0.318602	7.13691		0.318602	7.1013		0.318602	7.11809		0.318602	7.06433		0.318602	7.10494		0.318602	7.13798		0.318602	7.00903		0.318602	7.03		0.318602	7.07043		0.318602	7.05978		0.318602	7.10319		0.318602
	0.319682	7.11735		0.319682	7.178		0.426243	7.16804		0.319682	7.18949		0.319682	7.15901		0.319682	7.13485		0.319682	7.102		0.319682	7.12296		0.319682	7.06693		0.319682	7.10818		0.319682	7.1439		0.319682	7.01026		0.319682	7.03302		0.319682	7.07458		0.319682	7.05415		0.319682	7.10495		0.319682
	0.320762	7.10652		0.320762	7.17769		0.427683	7.17438		0.320762	7.19636		0.320762	7.15715		0.320762	7.13273		0.320762	7.1017		0.320762	7.12709		0.320762	7.06871		0.320762	7.11125		0.320762	7.14885		0.320762	7.01217		0.320762	7.03478		0.320762	7.07866		0.320762	7.04812		0.320762	7.10731		0.320762
	0.321842	7.09605		0.321842	7.17553		0.429123	7.1794		0.321842	7.20173		0.321842	7.15554		0.321842	7.1301		0.321842	7.10079		0.321842	7.12995		0.321842	7.06941		0.321842	7.11344		0.321842	7.15278		0.321842	7.01438		0.321842	7.03513		0.321842	7.08271		0.321842	7.04185		0.321842	7.1102		0.321842
	0.322922	7.08683		0.322922	7.17192		0.430563	7.18266		0.322922	7.20556		0.322922	7.15485		0.322922	7.12648		0.322922	7.09981		0.322922	7.1313		0.322922	7.06868		0.322922	7.11398		0.322922	7.15548		0.322922	7.01667		0.322922	7.03427		0.322922	7.08674		0.322922	7.03546		0.322922	7.11357		0.322922
	0.324002	7.07965		0.324002	7.16751		0.432003	7.18374		0.324002	7.20786		0.324002	7.15531		0.324002	7.12172		0.324002	7.09941		0.324002	7.13114		0.324002	7.06618		0.324002	7.11228		0.324002	7.15671		0.324002	7.01891		0.324002	7.03268		0.324002	7.09051		0.324002	7.0292		0.324002	7.11748		0.324002
	0.325082	7.07492		0.325082	7.16311		0.433443	7.1824		0.325082	7.20864		0.325082	7.15668		0.325082	7.11622		0.325082	7.10028		0.325082	7.12951		0.325082	7.06179		0.325082	7.1081		0.325082	7.15616		0.325082	7.021		0.325082	7.03096		0.325082	7.09351		0.325082	7.02337		0.325082	7.12215		0.325082
	0.326162	7.07273		0.326162	7.15965		0.434883	7.17884		0.326162	7.20786		0.326162	7.15837		0.326162	7.11082		0.326162	7.10306		0.326162	7.12653		0.326162	7.05581		0.326162	7.10154		0.326162	7.15352		0.326162	7.0231		0.326162	7.02986		0.326162	7.09528		0.326162	7.01837		0.326162	7.12774		0.326162
	0.327242	7.07291		0.327242	7.158		0.436323	7.17369		0.327242	7.20565		0.327242	7.15953		0.327242	7.10644		0.327242	7.10811		0.327242	7.12253		0.327242	7.04893		0.327242	7.09309		0.327242	7.14858		0.327242	7.02552		0.327242	7.03007		0.327242	7.09565		0.327242	7.01467		0.327242	7.13412		0.327242
	0.328322	7.07517		0.328322	7.15864		0.437763	7.16776		0.328322	7.20233		0.328322	7.15942		0.328322	7.10369		0.328322	7.11532		0.328322	7.11801		0.328322	7.04213		0.328322	7.0837		0.328322	7.1416		0.328322	7.02876		0.328322	7.0321		0.328322	7.09485		0.328322	7.01259		0.328322	7.1408		0.328322
	0.329402	7.07908		0.329402	7.16155		0.439203	7.16171		0.329402	7.19817		0.329402	7.15763		0.329402	7.10282		0.329402	7.12395		0.329402	7.11331		0.329402	7.03648		0.329402	7.07471		0.329402	7.13333		0.329402	7.03315		0.329402	7.03601		0.329402	7.09322		0.329402	7.01219		0.329402	7.14698		0.329402
	0.330482	7.08411		0.330482	7.1661		0.440643	7.15608		0.330482	7.19333		0.330482	7.15412		0.330482	7.10372		0.330482	7.13279		0.330482	7.10843		0.330482	7.03294		0.330482	7.06756		0.330482	7.12481		0.330482	7.03863		0.330482	7.04133		0.330482	7.09097		0.330482	7.01327		0.330482	7.15154		0.330482
	0.331562	7.08963		0.331562	7.17126		0.442083	7.15127		0.331562	7.18795		0.331562	7.14928		0.331562	7.10607		0.331562	7.1404		0.331562	7.10308		0.331562	7.03217		0.331562	7.0633		0.331562	7.11698		0.331562	7.04476		0.331562	7.04719		0.331562	7.08812		0.331562	7.0155		0.331562	7.15315		0.331562
	0.332642	7.09499		0.332642	7.17591		0.443523	7.14762		0.332642	7.18232		0.332642	7.14381		0.332642	7.10922		0.332642	7.14534		0.332642	7.09706		0.332642	7.03446		0.332642	7.06231		0.332642	7.11055		0.332642	7.05078		0.332642	7.05262		0.332642	7.08461		0.332642	7.01873		0.332642	7.15036		0.332642
	0.333722	7.09969		0.333722	7.17906		0.444963	7.14517		0.333722	7.17698		0.333722	7.13857		0.333722	7.11237		0.333722	7.14666		0.333722	7.09059		0.333722	7.03953		0.333722	7.0644		0.333722	7.10582		0.333722	7.05588		0.333722	7.05686		0.333722	7.08029		0.333722	7.02287		0.333722	7.14212		0.333722
	0.334802	7.10342		0.334802	7.18006		0.446403	7.14353		0.334802	7.17253		0.334802	7.13447		0.334802	7.11485		0.334802	7.14397		0.334802	7.08415		0.334802	7.0466		0.334802	7.06902		0.334802	7.10282		0.334802	7.05935		0.334802	7.05953		0.334802	7.07493		0.334802	7.02778		0.334802	7.12827		0.334802
	0.335882	7.10607		0.335882	7.17859		0.447843	7.14198		0.335882	7.16931		0.335882	7.1322		0.335882	7.11638		0.335882	7.13739		0.335882	7.07836		0.335882	7.05445		0.335882	7.07541		0.335882	7.10131		0.335882	7.06087		0.335882	7.06053		0.335882	7.06834		0.335882	7.03313		0.335882	7.10971		0.335882
	0.336962	7.10774		0.336962	7.17469		0.449283	7.13974		0.336962	7.1674		0.336962	7.13187		0.336962	7.11715		0.336962	7.12749		0.336962	7.07378		0.336962	7.0618		0.336962	7.08265		0.336962	7.10073		0.336962	7.06052		0.336962	7.05993		0.336962	7.06053		0.336962	7.03851		0.336962	7.08831		0.336962
	0.338042	7.10869		0.338042	7.16876		0.450723	7.13623		0.338042	7.16686		0.338042	7.13315		0.338042	7.11754		0.338042	7.11524		0.338042	7.07099		0.338042	7.0676		0.338042	7.08973		0.338042	7.10044		0.338042	7.05877		0.338042	7.05803		0.338042	7.05194		0.338042	7.04361		0.338042	7.06656		0.338042
	0.339122	7.10938		0.339122	7.16153		0.452163	7.13121		0.339122	7.16774		0.339122	7.13536		0.339122	7.1178		0.339122	7.10194		0.339122	7.07061		0.339122	7.07134		0.339122	7.09583		0.339122	7.10002		0.339122	7.05633		0.339122	7.05532		0.339122	7.04339		0.339122	7.04823		0.339122	7.04712		0.339122
	0.340202	7.11032		0.340202	7.1539		0.453603	7.12481		0.340202	7.17009		0.340202	7.13784		0.340202	7.11796		0.340202	7.08914		0.340202	7.07321		0.340202	7.07297		0.340202	7.10051		0.340202	7.09937		0.340202	7.0537		0.340202	7.05241		0.340202	7.03582		0.340202	7.05213		0.340202	7.03252		0.340202
	0.341282	7.11197		0.341282	7.14677		0.455043	7.11746		0.341282	7.1737		0.341282	7.14014		0.341282	7.11789		0.341282	7.07816		0.341282	7.07895		0.341282	7.07271		0.341282	7.10363		0.341282	7.09869		0.341282	7.05113		0.341282	7.04972		0.341282	7.03021		0.341282	7.05491		0.341282	7.02472		0.341282
	0.342362	7.11465		0.342362	7.14082		0.456483	7.10991		0.342362	7.17801		0.342362	7.14198		0.342362	7.11729		0.342362	7.0698		0.342362	7.08733		0.342362	7.07088		0.342362	7.10512		0.342362	7.0982		0.342362	7.04847		0.342362	7.04735		0.342362	7.02745		0.342362	7.05606		0.342362	7.02462		0.342362
	0.343442	7.11846		0.343442	7.13636		0.457923	7.10304		0.343442	7.18234		0.343442	7.14323		0.343442	7.11582		0.343442	7.0643		0.343442	7.09718		0.343442	7.06781		0.343442	7.10495		0.343442	7.09794		0.343442	7.04538		0.343442	7.04506		0.343442	7.02823		0.343442	7.05518		0.343442	7.03186		0.343442
	0.344522	7.12325		0.344522	7.13342		0.459363	7.09761		0.344522	7.1862		0.344522	7.144		0.344522	7.11313		0.344522	7.06153		0.344522	7.10708		0.344522	7.06378		0.344522	7.10323		0.344522	7.09786		0.344522	7.04143		0.344522	7.0426		0.344522	7.03286		0.344522	7.05235		0.344522	7.04497		0.344522
	0.345602	7.1287		0.345602	7.13186		0.460803	7.09419		0.345602	7.18944		0.345602	7.1445		0.345602	7.10901		0.345602	7.06111		0.345602	7.11568		0.345602	7.05895		0.345602	7.10034		0.345602	7.09783		0.345602	7.0363		0.345602	7.03983		0.345602	7.04101		0.345602	7.04822		0.345602	7.06174		0.345602
	0.346682	7.13435		0.346682	7.13145		0.462243	7.0931		0.346682	7.19201		0.346682	7.14502		0.346682	7.10351		0.346682	7.06251		0.346682	7.12202		0.346682	7.05335		0.346682	7.09676		0.346682	7.09757		0.346682	7.02983		0.346682	7.03668		0.346682	7.05169		0.346682	7.04386		0.346682	7.07986		0.346682
	0.347762	7.1397		0.347762	7.13184		0.463683	7.09451		0.347762	7.19389		0.347762	7.14573		0.347762	7.09705		0.347762	7.06502		0.347762	7.12551		0.347762	7.0469		0.347762	7.09279		0.347762	7.09661		0.347762	7.02215		0.347762	7.03316		0.347762	7.06354		0.347762	7.0404		0.347762	7.09716		0.347762
	0.348842	7.14428		0.348842	7.13262		0.465123	7.09841		0.348842	7.19507		0.348842	7.14658		0.348842	7.09024		0.348842	7.06786		0.348842	7.12596		0.348842	7.03978		0.348842	7.08854		0.348842	7.09453		0.348842	7.0139		0.348842	7.0294		0.348842	7.07508		0.348842	7.03881		0.348842	7.11188		0.348842
	0.349922	7.14771		0.349922	7.13331		0.466563	7.10442		0.349922	7.1957		0.349922	7.14737		0.349922	7.08371		0.349922	7.07045		0.349922	7.12366		0.349922	7.0325		0.349922	7.0842		0.349922	7.09111		0.349922	7.00615		0.349922	7.02578		0.349922	7.085		0.349922	7.03962		0.349922	7.12274		0.349922
	0.351002	7.14982		0.351002	7.1335		0.468003	7.11189		0.351002	7.19597		0.351002	7.14784		0.351002	7.07797		0.351002	7.07256		0.351002	7.11944		0.351002	7.02586		0.351002	7.08012		0.351002	7.08662		0.351002	7.00005		0.351002	7.02293		0.351002	7.09228		0.351002	7.04297		0.351002	7.12917		0.351002
	0.352082	7.15069		0.352082	7.13289		0.469443	7.12013		0.352082	7.19595		0.352082	7.14783		0.352082	7.0732		0.352082	7.07426		0.352082	7.11462		0.352082	7.02079		0.352082	7.07673		0.352082	7.08164		0.352082	6.99645		0.352082	7.02144		0.352082	7.09626		0.352082	7.04863		0.352082	7.13133		0.352082
	0.353162	7.1507		0.353162	7.13136		0.470883	7.12861		0.353162	7.19554		0.353162	7.14733		0.353162	7.06931		0.353162	7.07585		0.353162	7.11053		0.353162	7.01813		0.353162	7.0744		0.353162	7.07688		0.353162	6.99549		0.353162	7.02158		0.353162	7.09676		0.353162	7.05597		0.353162	7.12994		0.353162
	0.354242	7.15038		0.354242	7.12893		0.472323	7.13689		0.354242	7.19456		0.354242	7.14651		0.354242	7.06592		0.354242	7.07759		0.354242	7.10806		0.354242	7.01842		0.354242	7.07327		0.354242	7.07299		0.354242	6.99668		0.354242	7.02332		0.354242	7.09408		0.354242	7.06393		0.354242	7.12591		0.354242
	0.355322	7.1502		0.355322	7.12577		0.473763	7.14431		0.355322	7.19285		0.355322	7.14566		0.355322	7.06262		0.355322	7.07961		0.355322	7.1074		0.355322	7.02171		0.355322	7.07348		0.355322	7.07055		0.355322	6.99918		0.355322	7.02651		0.355322	7.08893		0.355322	7.0712		0.355322	7.12001		0.355322
	0.356402	7.15032		0.356402	7.12218		0.475203	7.15002		0.356402	7.19036		0.356402	7.14505		0.356402	7.05912		0.356402	7.08193		0.356402	7.10818		0.356402	7.0275		0.356402	7.07519		0.356402	7.07005		0.356402	7.00196		0.356402	7.03092		0.356402	7.08225		0.356402	7.07654		0.356402	7.11282		0.356402
	0.357482	7.15064		0.357482	7.11848		0.476643	7.15317		0.357482	7.18693		0.357482	7.14482		0.357482	7.05546		0.357482	7.08448		0.357482	7.10977		0.357482	7.03487		0.357482	7.07837		0.357482	7.07172		0.357482	7.0041		0.357482	7.03613		0.357482	7.07524		0.357482	7.07921		0.357482	7.105		0.357482
	0.358562	7.15088		0.358562	7.11499		0.478083	7.15347		0.358562	7.18252		0.358562	7.14486		0.358562	7.05188		0.358562	7.08721		0.358562	7.1115		0.358562	7.04274		0.358562	7.08267		0.358562	7.07551		0.358562	7.00488		0.358562	7.04136		0.358562	7.06907		0.358562	7.07921		0.358562	7.09726		0.358562
	0.359642	7.15076		0.359642	7.11213		0.479523	7.15135		0.359642	7.17735		0.359642	7.14492		0.359642	7.04878		0.359642	7.08997		0.359642	7.11281		0.359642	7.05008		0.359642	7.08742		0.359642	7.08101		0.359642	7.00396		0.359642	7.04548		0.359642	7.06468		0.359642	7.077		0.359642	7.09023		0.359642
	0.360722	7.15006		0.360722	7.11038		0.480963	7.14774		0.360722	7.17205		0.360722	7.14473		0.360722	7.04667		0.360722	7.0925		0.360722	7.11327		0.360722	7.05603		0.360722	7.09175		0.360722	7.08765		0.360722	7.00148		0.360722	7.04747		0.360722	7.0625		0.360722	7.07331		0.360722	7.0843		0.360722
	0.361802	7.14851		0.361802	7.11016		0.482403	7.14354		0.361802	7.16751		0.361802	7.14408		0.361802	7.04619		0.361802	7.09447		0.361802	7.11284		0.361802	7.0599		0.361802	7.0949		0.361802	7.09488		0.361802	6.99803		0.361802	7.04688		0.361802	7.06242		0.361802	7.06881		0.361802	7.07964		0.361802
	0.362882	7.1459		0.362882	7.11163		0.483843	7.13949		0.362882	7.16454		0.362882	7.14276		0.362882	7.04793		0.362882	7.09585		0.362882	7.11193		0.362882	7.0613		0.362882	7.09622		0.362882	7.10226		0.362882	6.99441		0.362882	7.04398		0.362882	7.06409		0.362882	7.06414		0.362882	7.07638		0.362882
	0.363962	7.14223		0.363962	7.11457		0.485283	7.13621		0.363962	7.16361		0.363962	7.14067		0.363962	7.0522		0.363962	7.09698		0.363962	7.11135		0.363962	7.06024		0.363962	7.09519		0.363962	7.10943		0.363962	6.99143		0.363962	7.03942		0.363962	7.06714		0.363962	7.05997		0.363962	7.07477		0.363962
	0.365042	7.13797		0.365042	7.11858		0.486723	7.13434		0.365042	7.16492		0.365042	7.13783		0.365042	7.05873		0.365042	7.09837		0.365042	7.112		0.365042	7.05706		0.365042	7.09166		0.365042	7.11604		0.365042	6.98956		0.365042	7.03414		0.365042	7.07128		0.365042	7.05699		0.365042	7.07492		0.365042
	0.366122	7.13394		0.366122	7.12312		0.488163	7.13441		0.366122	7.16847		0.366122	7.13462		0.366122	7.06679		0.366122	7.10044		0.366122	7.11457		0.366122	7.0522		0.366122	7.08597		0.366122	7.12158		0.366122	6.98891		0.366122	7.02912		0.366122	7.07607		0.366122	7.05563		0.366122	7.0765		0.366122
	0.367202	7.13094		0.367202	7.12759		0.489603	7.13654		0.367202	7.17401		0.367202	7.13171		0.367202	7.07561		0.367202	7.10332		0.367202	7.11921		0.367202	7.046		0.367202	7.07899		0.367202	7.12544		0.367202	6.98917		0.367202	7.02539		0.367202	7.08095		0.367202	7.05592		0.367202	7.07895		0.367202
	0.368282	7.12936		0.368282	7.1313		0.491043	7.14024		0.368282	7.1809		0.368282	7.12981		0.368282	7.08462		0.368282	7.10694		0.368282	7.12558		0.368282	7.03872		0.368282	7.07186		0.368282	7.12712		0.368282	6.98984		0.368282	7.02392		0.368282	7.08534		0.368282	7.05758		0.368282	7.08168		0.368282
	0.369362	7.12904		0.369362	7.13369		0.492483	7.14462		0.369362	7.18813		0.369362	7.12941		0.369362	7.09348		0.369362	7.11123		0.369362	7.13297		0.369362	7.03073		0.369362	7.06562		0.369362	7.1263		0.369362	6.99044		0.369362	7.02518		0.369362	7.08879		0.369362	7.06016		0.369362	7.08439		0.369362
	0.370442	7.12951		0.370442	7.13452		0.493923	7.1487		0.370442	7.19447		0.370442	7.13061		0.370442	7.10197		0.370442	7.11602		0.370442	7.14052		0.370442	7.02246		0.370442	7.06108		0.370442	7.12298		0.370442	6.99061		0.370442	7.02894		0.370442	7.09108		0.370442	7.06334		0.370442	7.08708		0.370442
	0.371522	7.13034		0.371522	7.13403		0.495363	7.15174		0.371522	7.199		0.371522	7.13312		0.371522	7.10986		0.371522	7.12087		0.371522	7.14742		0.371522	7.01443		0.371522	7.05891		0.371522	7.11758		0.371522	6.99021		0.371522	7.03436		0.371522	7.09197		0.371522	7.06679		0.371522	7.08971		0.371522
	0.372602	7.13117		0.372602	7.13288		0.496803	7.15333		0.372602	7.20127		0.372602	7.13652		0.372602	7.11696		0.372602	7.12507		0.372602	7.15311		0.372602	7.00715		0.372602	7.05969		0.372602	7.11071		0.372602	6.98937		0.372602	7.0403		0.372602	7.0911		0.372602	7.07012		0.372602	7.09222		0.372602
	0.373682	7.13155		0.373682	7.13173		0.498243	7.15333		0.373682	7.2014		0.373682	7.14045		0.373682	7.12327		0.373682	7.12779		0.373682	7.15731		0.373682	7.00123		0.373682	7.06378		0.373682	7.10325		0.373682	6.98844		0.373682	7.04567		0.373682	7.0879		0.373682	7.07278		0.373682	7.09463		0.373682
	0.374762	7.13096		0.374762	7.13114		0.499683	7.15166		0.374762	7.19976		0.374762	7.1445		0.374762	7.12879		0.374762	7.1284		0.374762	7.16007		0.374762	6.99738		0.374762	7.07107		0.374762	7.09627		0.374762	6.98793		0.374762	7.04968		0.374762	7.08195		0.374762	7.0743		0.374762	7.09714		0.374762
	0.375842	7.12903		0.375842	7.13157		0.501123	7.1484		0.375842	7.19683		0.375842	7.14825		0.375842	7.13334		0.375842	7.12673		0.375842	7.16172		0.375842	6.99619		0.375842	7.08088		0.375842	7.09102		0.375842	6.98837		0.375842	7.05191		0.375842	7.07324		0.375842	7.07453		0.375842	7.1		0.375842
	0.376922	7.1259		0.376922	7.13336		0.502563	7.1438		0.376922	7.19302		0.376922	7.15128		0.376922	7.13653		0.376922	7.12295		0.376922	7.16274		0.376922	6.99798		0.376922	7.09221		0.376922	7.08876		0.376922	6.99019		0.376922	7.05234		0.376922	7.06223		0.376922	7.07362		0.376922	7.1032		0.376922
	0.378002	7.12209		0.378002	7.13663		0.504003	7.13846		0.378002	7.1887		0.378002	7.15337		0.378002	7.13778		0.378002	7.1175		0.378002	7.16366		0.378002	7.00257		0.378002	7.10399		0.378002	7.0903		0.378002	6.99348		0.378002	7.05141		0.378002	7.04975		0.378002	7.07192		0.378002	7.10642		0.378002
	0.379082	7.11813		0.379082	7.14106		0.505443	7.13322		0.379082	7.18424		0.379082	7.1546		0.379082	7.13673		0.379082	7.11081		0.379082	7.16485		0.379082	7.00938		0.379082	7.11533		0.379082	7.09568		0.379082	6.99804		0.379082	7.04986		0.379082	7.03672		0.379082	7.06975		0.379082	7.10924		0.379082
	0.380162	7.11414		0.380162	7.14581		0.506883	7.1289		0.380162	7.17993		0.380162	7.15534		0.380162	7.13339		0.380162	7.10325		0.380162	7.16636		0.380162	7.01753		0.380162	7.12543		0.380162	7.10405		0.380162	7.0034		0.380162	7.0484		0.380162	7.02409		0.380162	7.06734		0.380162	7.11136		0.380162
	0.381242	7.11001		0.381242	7.14984		0.508323	7.12599		0.381242	7.1759		0.381242	7.15599		0.381242	7.12826		0.381242	7.09529		0.381242	7.16787		0.381242	7.02601		0.381242	7.13354		0.381242	7.11408		0.381242	7.00898		0.381242	7.0474		0.381242	7.01293		0.381242	7.06485		0.381242	7.11266		0.381242
	0.382322	7.10571		0.382322	7.15236		0.509763	7.12452		0.382322	7.17211		0.382322	7.15673		0.382322	7.12205		0.382322	7.08751		0.382322	7.16887		0.382322	7.03368		0.382322	7.139		0.382322	7.1243		0.382322	7.0142		0.382322	7.04684		0.382322	7.0044		0.382322	7.0624		0.382322	7.11312		0.382322
	0.383402	7.10163		0.383402	7.15307		0.511203	7.12404		0.383402	7.16838		0.383402	7.15755		0.383402	7.11555		0.383402	7.08055		0.383402	7.16884		0.383402	7.03955		0.383402	7.14153		0.383402	7.13344		0.383402	7.01855		0.383402	7.04649		0.383402	6.99946		0.383402	7.06		0.383402	7.1128		0.383402
	0.384482	7.09825		0.384482	7.15218		0.512643	7.12389		0.384482	7.16457		0.384482	7.15823		0.384482	7.10941		0.384482	7.07487		0.384482	7.16749		0.384482	7.043		0.384482	7.14153		0.384482	7.14036		0.384482	7.02162		0.384482	7.04619		0.384482	6.99848		0.384482	7.0576		0.384482	7.11184		0.384482
	0.385562	7.09593		0.385562	7.15016		0.514083	7.12325		0.385562	7.16069		0.385562	7.15857		0.385562	7.10408		0.385562	7.07057		0.385562	7.16486		0.385562	7.04399		0.385562	7.13992		0.385562	7.14412		0.385562	7.02321		0.385562	7.04578		0.385562	7.00124		0.385562	7.05516		0.385562	7.11045		0.385562
	0.386642	7.09482		0.386642	7.14767		0.515523	7.12135		0.386642	7.15683		0.386642	7.15833		0.386642	7.09989		0.386642	7.06748		0.386642	7.16123		0.386642	7.0431		0.386642	7.13766		0.386642	7.14418		0.386642	7.02332		0.386642	7.04498		0.386642	7.00705		0.386642	7.0527		0.386642	7.10877		0.386642
	0.387722	7.09503		0.387722	7.14565		0.516963	7.11772		0.387722	7.15318		0.387722	7.15713		0.387722	7.09698		0.387722	7.06539		0.387722	7.15705		0.387722	7.04125		0.387722	7.1354		0.387722	7.14078		0.387722	7.02215		0.387722	7.04339		0.387722	7.0151		0.387722	7.05041		0.387722	7.10675		0.387722
	0.388802	7.09676		0.388802	7.14522		0.518403	7.11235		0.388802	7.14983		0.388802	7.15452		0.388802	7.09531		0.388802	7.06427		0.388802	7.15281		0.388802	7.03927		0.388802	7.13323		0.388802	7.13497		0.388802	7.02		0.388802	7.0406		0.388802	7.02453		0.388802	7.04866		0.388802	7.10424		0.388802
	0.389882	7.10005		0.389882	7.14734		0.519843	7.10577		0.389882	7.14681		0.389882	7.15011		0.389882	7.09474		0.389882	7.06406		0.389882	7.14887		0.389882	7.03776		0.389882	7.13096		0.389882	7.12813		0.389882	7.01718		0.389882	7.03655		0.389882	7.03439		0.389882	7.04789		0.389882	7.10118		0.389882
	0.390963	7.1045		0.390963	7.15231		0.521283	7.09896		0.390963	7.14415		0.390963	7.1439		0.390963	7.0951		0.390963	7.06458		0.390963	7.14531		0.390963	7.03694		0.390963	7.12835		0.390963	7.12128		0.390963	7.01402		0.390963	7.03139		0.390963	7.04365		0.390963	7.04856		0.390963	7.09758		0.390963
	0.392043	7.10918		0.392043	7.15961		0.522723	7.09304		0.392043	7.14199		0.392043	7.13628		0.392043	7.09641		0.392043	7.0655		0.392043	7.14204		0.392043	7.03669		0.392043	7.12517		0.392043	7.11479		0.392043	7.01093		0.392043	7.02531		0.392043	7.05141		0.392043	7.05091		0.392043	7.09354		0.392043
	0.393123	7.11295		0.393123	7.16804		0.524163	7.08921		0.393123	7.1406		0.393123	7.12801		0.393123	7.09883		0.393123	7.06661		0.393123	7.13884		0.393123	7.03665		0.393123	7.12108		0.393123	7.10859		0.393123	7.00836		0.393123	7.01828		0.393123	7.05716		0.393123	7.05484		0.393123	7.08908		0.393123
	0.394203	7.11505		0.394203	7.17614		0.525603	7.08846		0.394203	7.1403		0.394203	7.11986		0.394203	7.10248		0.394203	7.06796		0.394203	7.1355		0.394203	7.03617		0.394203	7.11573		0.394203	7.1026		0.394203	7.00671		0.394203	7.0103		0.394203	7.06087		0.394203	7.05997		0.394203	7.08426		0.394203
	0.395283	7.11525		0.395283	7.1826		0.527043	7.09136		0.395283	7.14132		0.395283	7.11261		0.395283	7.10731		0.395283	7.06976		0.395283	7.13193		0.395283	7.03454		0.395283	7.10908		0.395283	7.09689		0.395283	7.00616		0.395283	7.0017		0.395283	7.06292		0.395283	7.06577		0.395283	7.07921		0.395283
	0.396363	7.11374		0.396363	7.18641		0.528483	7.0977		0.396363	7.1436		0.396363	7.10707		0.396363	7.11307		0.396363	7.07226		0.396363	7.12827		0.396363	7.03136		0.396363	7.10164		0.396363	7.09149		0.396363	7.00658		0.396363	6.99326		0.396363	7.06394		0.396363	7.07166		0.396363	7.07418		0.396363
	0.397443	7.11076		0.397443	7.18696		0.529923	7.10661		0.397443	7.14684		0.397443	7.10407		0.397443	7.11952		0.397443	7.07558		0.397443	7.12498		0.397443	7.02677		0.397443	7.09435		0.397443	7.08634		0.397443	7.00765		0.397443	6.986		0.397443	7.06457		0.397443	7.07706		0.397443	7.06941		0.397443
	0.398523	7.1065		0.398523	7.18419		0.531363	7.11681		0.398523	7.15055		0.398523	7.10423		0.398523	7.12646		0.398523	7.07989		0.398523	7.12283		0.398523	7.02148		0.398523	7.08817		0.398523	7.08143		0.398523	7.00901		0.398523	6.98071		0.398523	7.06541		0.398523	7.08138		0.398523	7.0651		0.398523
	0.399603	7.10129		0.399603	7.17856		0.532803	7.12706		0.399603	7.15432		0.399603	7.10769		0.399603	7.13371		0.399603	7.08526		0.399603	7.12272		0.399603	7.01655		0.399603	7.0836		0.399603	7.07718		0.399603	7.0103		0.399603	6.97784		0.399603	7.06676		0.399603	7.08411		0.399603	7.06148		0.399603
	0.400683	7.09562		0.400683	7.17104		0.534243	7.13631		0.400683	7.15782		0.400683	7.11409		0.400683	7.14093		0.400683	7.09158		0.400683	7.12521		0.400683	7.01293		0.400683	7.08065		0.400683	7.07458		0.400683	7.01111		0.400683	6.97769		0.400683	7.06862		0.400683	7.08507		0.400683	7.05884		0.400683
	0.401763	7.09003		0.401763	7.16279		0.535683	7.14368		0.401763	7.16087		0.401763	7.12265		0.401763	7.14761		0.401763	7.09844		0.401763	7.13022		0.401763	7.01123		0.401763	7.07902		0.401763	7.07477		0.401763	7.01089		0.401763	6.98045		0.401763	7.07067		0.401763	7.08438		0.401763	7.05762		0.401763
	0.402843	7.08475		0.402843	7.15484		0.537123	7.14837		0.402843	7.16324		0.402843	7.13238		0.402843	7.15327		0.402843	7.1052		0.402843	7.13704		0.402843	7.01168		0.402843	7.07834		0.402843	7.07841		0.402843	7.00927		0.402843	6.98612		0.402843	7.07241		0.402843	7.08236		0.402843	7.05833		0.402843
	0.403923	7.07973		0.403923	7.14777		0.538563	7.1498		0.403923	7.16475		0.403923	7.14214		0.403923	7.1575		0.403923	7.11126		0.403923	7.14454		0.403923	7.01425		0.403923	7.07837		0.403923	7.08541		0.403923	7.00622		0.403923	6.9943		0.403923	7.07327		0.403923	7.0793		0.403923	7.06147		0.403923
	0.405003	7.07492		0.405003	7.14176		0.540003	7.1479		0.405003	7.16528		0.405003	7.15079		0.405003	7.15994		0.405003	7.11625		0.405003	7.15156		0.405003	7.0187		0.405003	7.07882		0.405003	7.09508		0.405003	7.00217		0.405003	7.0041		0.405003	7.07277		0.405003	7.07525		0.405003	7.06738		0.405003
	0.406083	7.07058		0.406083	7.13677		0.541443	7.14312		0.406083	7.16491		0.406083	7.15739		0.406083	7.16012		0.406083	7.11985		0.406083	7.15714		0.406083	7.02455		0.406083	7.07942		0.406083	7.10654		0.406083	6.99777		0.406083	7.01437		0.406083	7.07077		0.406083	7.07012		0.406083	7.07599		0.406083
	0.407163	7.06728		0.407163	7.13265		0.542883	7.13624		0.407163	7.16395		0.407163	7.16144		0.407163	7.15758		0.407163	7.12184		0.407163	7.16052		0.407163	7.03111		0.407163	7.08002		0.407163	7.11896		0.407163	6.99356		0.407163	7.02409		0.407163	7.06763		0.407163	7.06385		0.407163	7.08683		0.407163
	0.408243	7.06563		0.408243	7.12925		0.544323	7.12816		0.408243	7.16266		0.408243	7.16295		0.408243	7.15215		0.408243	7.12214		0.408243	7.1612		0.408243	7.03772		0.408243	7.08064		0.408243	7.13152		0.408243	6.98985		0.408243	7.03251		0.408243	7.06407		0.408243	7.05655		0.408243	7.09899		0.408243
	0.409323	7.0659		0.409323	7.12637		0.545763	7.11968		0.409323	7.16109		0.409323	7.1623		0.409323	7.14418		0.409323	7.12101		0.409323	7.15912		0.409323	7.04389		0.409323	7.08141		0.409323	7.14323		0.409323	6.98687		0.409323	7.03916		0.409323	7.06105		0.409323	7.04848		0.409323	7.11137		0.409323
	0.410403	7.06803		0.410403	7.12385		0.547204	7.1116		0.410403	7.15915		0.410403	7.16008		0.410403	7.13438		0.410403	7.11902		0.410403	7.15474		0.410403	7.04941		0.410403	7.08241		0.410403	7.15324		0.410403	6.98494		0.410403	7.0438		0.410403	7.05934		0.410403	7.03994		0.410403	7.1229		0.410403
	0.411483	7.07164		0.411483	7.12162		0.548644	7.10464		0.411483	7.15679		0.411483	7.15697		0.411483	7.12371		0.411483	7.11691		0.411483	7.14895		0.411483	7.05414		0.411483	7.08342		0.411483	7.16112		0.411483	6.9843		0.411483	7.0464		0.411483	7.05932		0.411483	7.03135		0.411483	7.13274		0.411483
	0.412563	7.07616		0.412563	7.1197		0.550084	7.09936		0.412563	7.15426		0.412563	7.1536		0.412563	7.11308		0.412563	7.11529		0.412563	7.14269		0.412563	7.05778		0.412563	7.08408		0.412563	7.16696		0.412563	6.9849		0.412563	7.04735		0.412563	7.06094		0.412563	7.02335		0.412563	7.14026		0.412563
	0.413643	7.08088		0.413643	7.11803		0.551524	7.09593		0.413643	7.15193		0.413643	7.15059		0.413643	7.10326		0.413643	7.11447		0.413643	7.13666		0.413643	7.05992		0.413643	7.08402		0.413643	7.17108		0.413643	6.98622		0.413643	7.04743		0.413643	7.06372		0.413643	7.01678		0.413643	7.14519		0.413643
	0.414723	7.08509		0.414723	7.11641		0.552964	7.09411		0.414723	7.15018		0.414723	7.14825		0.414723	7.0949		0.414723	7.11446		0.414723	7.13131		0.414723	7.06035		0.414723	7.08312		0.414723	7.17358		0.414723	6.9875		0.414723	7.04756		0.414723	7.06698		0.414723	7.01242		0.414723	7.1477		0.414723
	0.415803	7.08828		0.415803	7.11453		0.554404	7.09348		0.415803	7.14917		0.415803	7.1466		0.415803	7.08836		0.415803	7.11502		0.415803	7.12698		0.415803	7.05928		0.415803	7.08146		0.415803	7.17419		0.415803	6.98822		0.415803	7.04863		0.415803	7.06996		0.415803	7.01061		0.415803	7.14834		0.415803
	0.416883	7.09029		0.416883	7.1122		0.555844	7.09372		0.416883	7.14893		0.416883	7.14541		0.416883	7.08364		0.416883	7.11581		0.416883	7.12413		0.416883	7.05729		0.416883	7.07928		0.416883	7.17254		0.416883	6.98834		0.416883	7.05113		0.416883	7.07201		0.416883	7.01117		0.416883	7.14782		0.416883
	0.417963	7.09136		0.417963	7.1095		0.557284	7.09472		0.417963	7.14963		0.417963	7.14434		0.417963	7.08044		0.417963	7.11656		0.417963	7.12326		0.417963	7.05503		0.417963	7.07688		0.417963	7.16849		0.417963	6.9882		0.417963	7.05513		0.417963	7.07264		0.417963	7.01349		0.417963	7.14669		0.417963
	0.419043	7.09195		0.419043	7.10685		0.558724	7.09654		0.419043	7.15148		0.419043	7.14313		0.419043	7.07837		0.419043	7.11698		0.419043	7.12473		0.419043	7.05298		0.419043	7.07457		0.419043	7.16234		0.419043	6.98817		0.419043	7.06031		0.419043	7.07161		0.419043	7.01684		0.419043	7.14517		0.419043
	0.420123	7.09261		0.420123	7.10484		0.560164	7.09929		0.420123	7.15472		0.420123	7.14163		0.420123	7.07711		0.420123	7.11688		0.420123	7.12852		0.420123	7.05143		0.420123	7.0727		0.420123	7.15468		0.420123	6.98848		0.420123	7.06606		0.420123	7.06912		0.420123	7.02042		0.420123	7.14315		0.420123
	0.421203	7.09372		0.421203	7.10403		0.561604	7.10306		0.421203	7.1593		0.421203	7.1399		0.421203	7.07653		0.421203	7.1161		0.421203	7.13428		0.421203	7.05054		0.421203	7.07165		0.421203	7.14619		0.421203	6.98926		0.421203	7.07157		0.421203	7.06578		0.421203	7.02338		0.421203	7.14042		0.421203
	0.422283	7.09532		0.422283	7.10477		0.563044	7.1079		0.422283	7.16495		0.422283	7.13811		0.422283	7.07666		0.422283	7.1147		0.422283	7.14138		0.422283	7.05028		0.422283	7.07166		0.422283	7.13753		0.422283	6.99071		0.422283	7.07602		0.422283	7.06242		0.422283	7.02499		0.422283	7.13673		0.422283
	0.423363	7.09709		0.423363	7.10711		0.564484	7.11384		0.423363	7.17121		0.423363	7.1365		0.423363	7.07765		0.423363	7.11302		0.423363	7.14908		0.423363	7.05043		0.423363	7.07273		0.423363	7.12943		0.423363	6.99298		0.423363	7.07874		0.423363	7.05973		0.423363	7.02489		0.423363	7.13193		0.423363
	0.424443	7.0985		0.424443	7.11077		0.565924	7.12082		0.424443	7.17755		0.424443	7.13524		0.424443	7.07975		0.424443	7.11154		0.424443	7.1565		0.424443	7.0507		0.424443	7.07469		0.424443	7.12253		0.424443	6.99597		0.424443	7.07927		0.424443	7.05792		0.424443	7.02332		0.424443	7.12599		0.424443
	0.425523	7.0991		0.425523	7.11521		0.567364	7.12847		0.425523	7.1835		0.425523	7.13452		0.425523	7.0832		0.425523	7.11054		0.425523	7.16263		0.425523	7.05091		0.425523	7.07727		0.425523	7.11738		0.425523	6.9992		0.425523	7.07753		0.425523	7.05686		0.425523	7.02103		0.425523	7.11923		0.425523
	0.426603	7.09869		0.426603	7.1197		0.568804	7.13612		0.426603	7.18864		0.426603	7.13455		0.426603	7.08811		0.426603	7.10998		0.426603	7.16656		0.426603	7.05121		0.426603	7.08028		0.426603	7.11423		0.426603	7.00194		0.426603	7.07381		0.426603	7.0563		0.426603	7.01881		0.426603	7.11229		0.426603
	0.427683	7.09732		0.427683	7.12339		0.570244	7.143		0.427683	7.19261		0.427683	7.13549		0.427683	7.09432		0.427683	7.10947		0.427683	7.16771		0.427683	7.05201		0.427683	7.08347		0.427683	7.11294		0.427683	7.00364		0.427683	7.06878		0.427683	7.05609		0.427683	7.01727		0.427683	7.10598		0.427683
	0.428763	7.0953		0.428763	7.12552		0.571684	7.14857		0.428763	7.19515		0.428763	7.1372		0.428763	7.1014		0.428763	7.10863		0.428763	7.166		0.428763	7.05391		0.428763	7.0865		0.428763	7.11314		0.428763	7.00411		0.428763	7.06338		0.428763	7.05606		0.428763	7.01666		0.428763	7.101		0.428763
	0.429843	7.09319		0.429843	7.12556		0.573124	7.15268		0.429843	7.19619		0.429843	7.13916		0.429843	7.10869		0.429843	7.10726		0.429843	7.1618		0.429843	7.0575		0.429843	7.08898		0.429843	7.11452		0.429843	7.00362		0.429843	7.05854		0.429843	7.05587		0.429843	7.01694		0.429843	7.09773		0.429843
	0.430923	7.0919		0.430923	7.12342		0.574564	7.15541		0.430923	7.19584		0.430923	7.14078		0.430923	7.11543		0.430923	7.1054		0.430923	7.15566		0.430923	7.0631		0.430923	7.09053		0.430923	7.11688		0.430923	7.00267		0.430923	7.05501		0.430923	7.05511		0.430923	7.01793		0.430923	7.09625		0.430923
	0.432003	7.09237		0.432003	7.1194		0.576004	7.15677		0.432003	7.19431		0.432003	7.14165		0.432003	7.12088		0.432003	7.10319		0.432003	7.14821		0.432003	7.07055		0.432003	7.09089		0.432003	7.1202		0.432003	7.00176		0.432003	7.05324		0.432003	7.05339		0.432003	7.01926		0.432003	7.09647		0.432003
	0.433083	7.09521		0.433083	7.11408		0.577444	7.15664		0.433083	7.19184		0.433083	7.14172		0.433083	7.1244		0.433083	7.10086		0.433083	7.14011		0.433083	7.07922		0.433083	7.09001		0.433083	7.12441		0.433083	7.00137		0.433083	7.05345		0.433083	7.05059		0.433083	7.02047		0.433083	7.09822		0.433083
	0.434163	7.1003		0.434163	7.10812		0.578884	7.15505		0.434163	7.18859		0.434163	7.14112		0.434163	7.12562		0.434163	7.09869		0.434163	7.13201		0.434163	7.08806		0.434163	7.08801		0.434163	7.12937		0.434163	7.00188		0.434163	7.05569		0.434163	7.04688		0.434163	7.02124		0.434163	7.10109		0.434163
	0.435243	7.10696		0.435243	7.1022		0.580324	7.15219		0.435243	7.18466		0.435243	7.14007		0.435243	7.1245		0.435243	7.09707		0.435243	7.12439		0.435243	7.09591		0.435243	7.08519		0.435243	7.13478		0.435243	7.00349		0.435243	7.05974		0.435243	7.04253		0.435243	7.02151		0.435243	7.10468		0.435243
	0.436323	7.11416		0.436323	7.09705		0.581764	7.14841		0.436323	7.18026		0.436323	7.13878		0.436323	7.12136		0.436323	7.09639		0.436323	7.11745		0.436323	7.10183		0.436323	7.08194		0.436323	7.14018		0.436323	7.00614		0.436323	7.06508		0.436323	7.03784		0.436323	7.02158		0.436323	7.10863		0.436323
	0.437403	7.12089		0.437403	7.0934		0.583204	7.14396		0.437403	7.17575		0.437403	7.13776		0.437403	7.11689		0.437403	7.09681		0.437403	7.11106		0.437403	7.10523		0.437403	7.07869		0.437403	7.14501		0.437403	7.00951		0.437403	7.07085		0.437403	7.03312		0.437403	7.02195		0.437403	7.11285		0.437403
	0.438483	7.12621		0.438483	7.09188		0.584644	7.13893		0.438483	7.17167		0.438483	7.13766		0.438483	7.11198		0.438483	7.09819		0.438483	7.10511		0.438483	7.10604		0.438483	7.07573		0.438483	7.14868		0.438483	7.01308		0.438483	7.07615		0.438483	7.02874		0.438483	7.02297		0.438483	7.11734		0.438483
	0.439563	7.12935		0.439563	7.09288		0.586084	7.13335		0.439563	7.16848		0.439563	7.13912		0.439563	7.10754		0.439563	7.10011		0.439563	7.09959		0.439563	7.10464		0.439563	7.07316		0.439563	7.15076		0.439563	7.01641		0.439563	7.08032		0.439563	7.02515		0.439563	7.0247		0.439563	7.12201		0.439563
	0.440643	7.12986		0.440643	7.0965		0.587524	7.1274		0.440643	7.16643		0.440643	7.14243		0.440643	7.10428		0.440643	7.10205		0.440643	7.09465		0.440643	7.10176		0.440643	7.07087		0.440643	7.151		0.440643	7.01929		0.440643	7.083		0.440643	7.02275		0.440643	7.02696		0.440643	7.12655		0.440643
	0.441723	7.12792		0.441723	7.10264		0.588964	7.12132		0.441723	7.1654		0.441723	7.14749		0.441723	7.10256		0.441723	7.10368		0.441723	7.09041		0.441723	7.09827		0.441723	7.06863		0.441723	7.14942		0.441723	7.02168		0.441723	7.08411		0.441723	7.02173		0.441723	7.02934		0.441723	7.13054		0.441723
	0.442803	7.12434		0.442803	7.11098		0.590404	7.11531		0.442803	7.16497		0.442803	7.154		0.442803	7.10236		0.442803	7.1049		0.442803	7.08689		0.442803	7.09502		0.442803	7.06629		0.442803	7.14618		0.442803	7.02367		0.442803	7.0838		0.442803	7.022		0.442803	7.03124		0.442803	7.13358		0.442803
	0.443883	7.12027		0.443883	7.12095		0.591844	7.1095		0.443883	7.1646		0.443883	7.16155		0.443883	7.10327		0.443883	7.10579		0.443883	7.08413		0.443883	7.09265		0.443883	7.06369		0.443883	7.1416		0.443883	7.02546		0.443883	7.08249		0.443883	7.02328		0.443883	7.03196		0.443883	7.13527		0.443883
	0.444963	7.11675		0.444963	7.13176		0.593284	7.10403		0.444963	7.16361		0.444963	7.16971		0.444963	7.1047		0.444963	7.10642		0.444963	7.08233		0.444963	7.09148		0.444963	7.06078		0.444963	7.13614		0.444963	7.02736		0.444963	7.08079		0.444963	7.02528		0.444963	7.03093		0.444963	7.13525		0.444963
	0.446043	7.11434		0.446043	7.14253		0.594724	7.09904		0.446043	7.16136		0.446043	7.17794		0.446043	7.10597		0.446043	7.10673		0.446043	7.08178		0.446043	7.09129		0.446043	7.05755		0.446043	7.1304		0.446043	7.0298		0.446043	7.07929		0.446043	7.02778		0.446043	7.02796		0.446043	7.13331		0.446043
	0.447123	7.11319		0.447123	7.15251		0.596164	7.09473		0.447123	7.15732		0.447123	7.18563		0.447123	7.10653		0.447123	7.10663		0.447123	7.08284		0.447123	7.09143		0.447123	7.05422		0.447123	7.12492		0.447123	7.03296		0.447123	7.07835		0.447123	7.03065		0.447123	7.02349		0.447123	7.12965		0.447123
	0.448203	7.11317		0.448203	7.16119		0.597604	7.09124		0.448203	7.15145		0.448203	7.19232		0.448203	7.1061		0.448203	7.10608		0.448203	7.08566		0.448203	7.09102		0.448203	7.05121		0.448203	7.1201		0.448203	7.03664		0.448203	7.07804		0.448203	7.03377		0.448203	7.0184		0.448203	7.12493		0.448203
	0.449283	7.11396		0.449283	7.16828		0.599044	7.08868		0.449283	7.14432		0.449283	7.1977		0.449283	7.10474		0.449283	7.10518		0.449283	7.09018		0.449283	7.08929		0.449283	7.04907		0.449283	7.11619		0.449283	7.04031		0.449283	7.07827		0.449283	7.03704		0.449283	7.01361		0.449283	7.11994		0.449283
	0.450363	7.11506		0.450363	7.17368		0.600484	7.08721		0.450363	7.13703		0.450363	7.20162		0.450363	7.10291		0.450363	7.10393		0.450363	7.09621		0.450363	7.08569		0.450363	7.04821		0.450363	7.11344		0.450363	7.04333		0.450363	7.07885		0.450363	7.04034		0.450363	7.00996		0.450363	7.11528		0.450363
	0.451443	7.11588		0.451443	7.1774		0.601924	7.08693		0.451443	7.13077		0.451443	7.20399		0.451443	7.10128		0.451443	7.10219		0.451443	7.10353		0.451443	7.07981		0.451443	7.04882		0.451443	7.11214		0.451443	7.0451		0.451443	7.07963		0.451443	7.04355		0.451443	7.00817		0.451443	7.11118		0.451443
	0.452523	7.11596		0.452523	7.17964		0.603364	7.08781		0.452523	7.12632		0.452523	7.20482		0.452523	7.10052		0.452523	7.09999		0.452523	7.11188		0.452523	7.07146		0.452523	7.05094		0.452523	7.11256		0.452523	7.04508		0.452523	7.08029		0.452523	7.04643		0.452523	7.00881		0.452523	7.10768		0.452523
	0.453603	7.1152		0.453603	7.18064		0.604804	7.08959		0.453603	7.12388		0.453603	7.20424		0.453603	7.10117		0.453603	7.09772		0.453603	7.12093		0.453603	7.0609		0.453603	7.05449		0.453603	7.11467		0.453603	7.04266		0.453603	7.08052		0.453603	7.04859		0.453603	7.0121		0.453603	7.10462		0.453603
	0.454683	7.1139		0.454683	7.18058		0.606244	7.0918		0.454683	7.12311		0.454683	7.20263		0.454683	7.10336		0.454683	7.09613		0.454683	7.13022		0.454683	7.04907		0.454683	7.05933		0.454683	7.11815		0.454683	7.03723		0.454683	7.08001		0.454683	7.04955		0.454683	7.01773		0.454683	7.10163		0.454683
	0.455763	7.11254		0.455763	7.17946		0.607684	7.09398		0.455763	7.12344		0.455763	7.20044		0.455763	7.10688		0.455763	7.09584		0.455763	7.13909		0.455763	7.03738		0.455763	7.06517		0.455763	7.12234		0.455763	7.02863		0.455763	7.0785		0.455763	7.04887		0.455763	7.02484		0.455763	7.09792		0.455763
	0.456843	7.1115		0.456843	7.17723		0.609124	7.09569		0.456843	7.12418		0.456843	7.19799		0.456843	7.11123		0.456843	7.09702		0.456843	7.14693		0.456843	7.02729		0.456843	7.07141		0.456843	7.12642		0.456843	7.0173		0.456843	7.07589		0.456843	7.04629		0.456843	7.03239		0.456843	7.09262		0.456843
	0.457923	7.11086		0.457923	7.17403		0.610564	7.09652		0.457923	7.12465		0.457923	7.19541		0.457923	7.11575		0.457923	7.0994		0.457923	7.15322		0.457923	7.01988		0.457923	7.07735		0.457923	7.12962		0.457923	7.00436		0.457923	7.07205		0.457923	7.04188		0.457923	7.03956		0.457923	7.08517		0.457923
	0.459003	7.11039		0.459003	7.17012		0.612004	7.09612		0.459003	7.12432		0.459003	7.19269		0.459003	7.11989		0.459003	7.10254		0.459003	7.15763		0.459003	7.01584		0.459003	7.08235		0.459003	7.13127		0.459003	6.99121		0.459003	7.06694		0.459003	7.0361		0.459003	7.04591		0.459003	7.0757		0.459003
	0.460083	7.10956		0.460083	7.16589		0.613444	7.09438		0.460083	7.12308		0.460083	7.18978		0.460083	7.12319		0.460083	7.10602		0.460083	7.15995		0.460083	7.01554		0.460083	7.08601		0.460083	7.13103		0.460083	6.97923		0.460083	7.06057		0.460083	7.02974		0.460083	7.05125		0.460083	7.06493		0.460083
	0.461163	7.10769		0.461163	7.16169		0.614884	7.09147		0.461163	7.12143		0.461163	7.18665		0.461163	7.12536		0.461163	7.1092		0.461163	7.16023		0.461163	7.01897		0.461163	7.08824		0.461163	7.12892		0.461163	6.96968		0.461163	7.05324		0.461163	7.02382		0.461163	7.05555		0.461163	7.05387		0.461163
	0.462243	7.10414		0.462243	7.15804		0.616324	7.08798		0.462243	7.12029		0.462243	7.18317		0.462243	7.12636		0.462243	7.11125		0.462243	7.15866		0.462243	7.02566		0.462243	7.08907		0.462243	7.12534		0.462243	6.96367		0.462243	7.04555		0.462243	7.01945		0.462243	7.05871		0.462243	7.04357		0.462243
	0.463323	7.09865		0.463323	7.1556		0.617764	7.08463		0.463323	7.12062		0.463323	7.17921		0.463323	7.12637		0.463323	7.1115		0.463323	7.15559		0.463323	7.0345		0.463323	7.08865		0.463323	7.12084		0.463323	6.96194		0.463323	7.03838		0.463323	7.01752		0.463323	7.06076		0.463323	7.03508		0.463323
	0.464403	7.09159		0.464403	7.15498		0.619204	7.08211		0.464403	7.12296		0.464403	7.17478		0.464403	7.12576		0.464403	7.10986		0.464403	7.15147		0.464403	7.04408		0.464403	7.08715		0.464403	7.11607		0.464403	6.96458		0.464403	7.03264		0.464403	7.01855		0.464403	7.06183		0.464403	7.02947		0.464403
	0.465483	7.0838		0.465483	7.15638		0.620644	7.08094		0.465483	7.12717		0.465483	7.17019		0.465483	7.12487		0.465483	7.10679		0.465483	7.1467		0.465483	7.05316		0.465483	7.08488		0.465483	7.11151		0.465483	6.97092		0.465483	7.02887		0.465483	7.02251		0.465483	7.06231		0.465483	7.02767		0.465483
	0.466563	7.07643		0.466563	7.15935		0.622084	7.08154		0.466563	7.13255		0.466563	7.16593		0.466563	7.12394		0.466563	7.10297		0.466563	7.14171		0.466563	7.06095		0.466563	7.08219		0.466563	7.10738		0.466563	6.97968		0.466563	7.02714		0.466563	7.02877		0.466563	7.0627		0.466563	7.03019		0.466563
	0.467643	7.0706		0.467643	7.16299		0.623524	7.08411		0.467643	7.13812		0.467643	7.16253		0.467643	7.12299		0.467643	7.09886		0.467643	7.13701		0.467643	7.0671		0.467643	7.07938		0.467643	7.10352		0.467643	6.98941		0.467643	7.0271		0.467643	7.03635		0.467643	7.06341		0.467643	7.03692		0.467643
	0.468723	7.06722		0.468723	7.16627		0.624964	7.08856		0.468723	7.14281		0.468723	7.16022		0.468723	7.12194		0.468723	7.09482		0.468723	7.13305		0.468723	7.07139		0.468723	7.0766		0.468723	7.09946		0.468723	6.9988		0.468723	7.02817		0.468723	7.04414		0.468723	7.06464		0.468723	7.04718		0.468723
	0.469803	7.0668		0.469803	7.16828		0.626404	7.09437		0.469803	7.14557		0.469803	7.15898		0.469803	7.12073		0.469803	7.09131		0.469803	7.13009		0.469803	7.07365		0.469803	7.07384		0.469803	7.09465		0.469803	7.00681		0.469803	7.02976		0.469803	7.05118		0.469803	7.06642		0.469803	7.05988		0.469803
	0.470883	7.06922		0.470883	7.16826		0.627844	7.1007		0.470883	7.14565		0.470883	7.15864		0.470883	7.11936		0.470883	7.08885		0.470883	7.12813		0.470883	7.07378		0.470883	7.07093		0.470883	7.08876		0.470883	7.01277		0.470883	7.03134		0.470883	7.0568		0.470883	7.06884		0.470883	7.07377		0.470883
	0.471963	7.07371		0.471963	7.16564		0.629284	7.10673		0.471963	7.14288		0.471963	7.15892		0.471963	7.11801		0.471963	7.08774		0.471963	7.12707		0.471963	7.07192		0.471963	7.06773		0.471963	7.08193		0.471963	7.01646		0.471963	7.03263		0.471963	7.06072		0.471963	7.07212		0.471963	7.08752		0.471963
	0.473043	7.07905		0.473043	7.1602		0.630724	7.11196		0.473043	7.13778		0.473043	7.15934		0.473043	7.11698		0.473043	7.08799		0.473043	7.12689		0.473043	7.06843		0.473043	7.06426		0.473043	7.07471		0.473043	7.01827		0.473043	7.03381		0.473043	7.06312		0.473043	7.07635		0.473043	7.09978		0.473043
	0.474123	7.08395		0.474123	7.15215		0.632164	7.11614		0.474123	7.13146		0.474123	7.15921		0.474123	7.11659		0.474123	7.08939		0.474123	7.12764		0.474123	7.06365		0.474123	7.06076		0.474123	7.06809		0.474123	7.01901		0.474123	7.03552		0.474123	7.06451		0.474123	7.08123		0.474123	7.10936		0.474123
	0.475203	7.08745		0.475203	7.1423		0.633604	7.11913		0.475203	7.12529		0.475203	7.15778		0.475203	7.11703		0.475203	7.09178		0.475203	7.12925		0.475203	7.05774		0.475203	7.05755		0.475203	7.06322		0.475203	7.01949		0.475203	7.03875		0.475203	7.06552		0.475203	7.08594		0.475203	7.11546		0.475203
	0.476283	7.089		0.476283	7.13187		0.635044	7.12069		0.476283	7.12049		0.476283	7.15463		0.476283	7.11833		0.476283	7.09517		0.476283	7.1314		0.476283	7.05079		0.476283	7.05503		0.476283	7.06121		0.476283	7.02028		0.476283	7.04432		0.476283	7.06664		0.476283	7.08943		0.476283	7.11787		0.476283
	0.477363	7.08857		0.477363	7.1222		0.636484	7.12063		0.477363	7.118		0.477363	7.14992		0.477363	7.1203		0.477363	7.0994		0.477363	7.13365		0.477363	7.04308		0.477363	7.05357		0.477363	7.06288		0.477363	7.02146		0.477363	7.05251		0.477363	7.06796		0.477363	7.09083		0.477363	7.11706		0.477363
	0.478443	7.08662		0.478443	7.11444		0.637924	7.11906		0.478443	7.11836		0.478443	7.14432		0.478443	7.12264		0.478443	7.10406		0.478443	7.13563		0.478443	7.03527		0.478443	7.05347		0.478443	7.06847		0.478443	7.02295		0.478443	7.06289		0.478443	7.06918		0.478443	7.08965		0.478443	7.11401		0.478443
	0.479523	7.08397		0.479523	7.10937		0.639364	7.11635		0.479523	7.12161		0.479523	7.13876		0.479523	7.12476		0.479523	7.10859		0.479523	7.13707		0.479523	7.02825		0.479523	7.0549		0.479523	7.07762		0.479523	7.0245		0.479523	7.07437		0.479523	7.06966		0.479523	7.08564		0.479523	7.10998		0.479523
	0.480603	7.08143		0.480603	7.10734		0.640804	7.11282		0.480603	7.1273		0.480603	7.13406		0.480603	7.12577		0.480603	7.1124		0.480603	7.1377		0.480603	7.02278		0.480603	7.05776		0.480603	7.08934		0.480603	7.02576		0.480603	7.08551		0.480603	7.06866		0.480603	7.0787		0.480603	7.10624		0.480603
	0.481683	7.07955		0.481683	7.1084		0.642244	7.10853		0.481683	7.13459		0.481683	7.1309		0.481683	7.12475		0.481683	7.11515		0.481683	7.13718		0.481683	7.01916		0.481683	7.06154		0.481683	7.10217		0.481683	7.02624		0.481683	7.09471		0.481683	7.06548		0.481683	7.06896		0.481683	7.10395		0.481683
	0.482763	7.0786		0.482763	7.11247		0.643684	7.10333		0.482763	7.14251		0.482763	7.12991		0.482763	7.1211		0.482763	7.1167		0.482763	7.13514		0.482763	7.01737		0.482763	7.06548		0.482763	7.11439		0.482763	7.02549		0.482763	7.10056		0.482763	7.05977		0.482763	7.05701		0.482763	7.10381		0.482763
	0.483843	7.07864		0.483843	7.1193		0.645124	7.09729		0.483843	7.15031		0.483843	7.13146		0.483843	7.11475		0.483843	7.11708		0.483843	7.13149		0.483843	7.01728		0.483843	7.06879		0.483843	7.12441		0.483843	7.02336		0.483843	7.10219		0.483843	7.05176		0.483843	7.04396		0.483843	7.10599		0.483843
	0.484923	7.07959		0.484923	7.12826		0.646564	7.09086		0.484923	7.15749		0.484923	7.13548		0.484923	7.10629		0.484923	7.11648		0.484923	7.12648		0.484923	7.01867		0.484923	7.07091		0.484923	7.13119		0.484923	7.02026		0.484923	7.09935		0.484923	7.04227		0.484923	7.0312		0.484923	7.11013		0.484923
	0.486003	7.08119		0.486003	7.1384		0.648004	7.08466		0.486003	7.16382		0.486003	7.14121		0.486003	7.09663		0.486003	7.1153		0.486003	7.12058		0.486003	7.02121		0.486003	7.07165		0.486003	7.13437		0.486003	7.01712		0.486003	7.09254		0.486003	7.03255		0.486003	7.02002		0.486003	7.11548		0.486003
	0.487083	7.08295		0.487083	7.14856		0.649444	7.07909		0.487083	7.16919		0.487083	7.14745		0.487083	7.0869		0.487083	7.11409		0.487083	7.11427		0.487083	7.02434		0.487083	7.07104		0.487083	7.13416		0.487083	7.015		0.487083	7.08275		0.487083	7.024		0.487083	7.01137		0.487083	7.12124		0.487083
	0.488163	7.08444		0.488163	7.15782		0.650884	7.07427		0.488163	7.17367		0.488163	7.15296		0.488163	7.07818		0.488163	7.11341		0.488163	7.108		0.488163	7.02747		0.488163	7.06928		0.488163	7.1312		0.488163	7.0147		0.488163	7.07121		0.488163	7.01785		0.488163	7.00577		0.488163	7.12662		0.488163
	0.489243	7.08548		0.489243	7.16566		0.652324	7.07029		0.489243	7.17745		0.489243	7.15693		0.489243	7.07144		0.489243	7.1136		0.489243	7.10224		0.489243	7.03028		0.489243	7.0668		0.489243	7.1265		0.489243	7.01662		0.489243	7.05916		0.489243	7.01496		0.489243	7.00349		0.489243	7.13101		0.489243
	0.490323	7.08624		0.490323	7.17192		0.653764	7.06736		0.490323	7.18077		0.490323	7.15911		0.490323	7.06717		0.490323	7.11464		0.490323	7.09749		0.490323	7.03277		0.490323	7.06418		0.490323	7.12137		0.490323	7.0208		0.490323	7.04776		0.490323	7.01573		0.490323	7.00459		0.490323	7.13406		0.490323
	0.491403	7.08696		0.491403	7.17649		0.655204	7.06567		0.491403	7.18374		0.491403	7.1597		0.491403	7.06541		0.491403	7.11611		0.491403	7.0941		0.491403	7.03518		0.491403	7.06209		0.491403	7.11719		0.491403	7.0271		0.491403	7.03784		0.491403	7.02001		0.491403	7.00893		0.491403	7.13577		0.491403
	0.492483	7.08762		0.492483	7.17919		0.656644	7.06527		0.492483	7.18623		0.492483	7.15933		0.492483	7.06572		0.492483	7.11735		0.492483	7.09214		0.492483	7.03776		0.492483	7.06108		0.492483	7.11513		0.492483	7.03503		0.492483	7.02982		0.492483	7.02724		0.492483	7.01601		0.492483	7.13645		0.492483
	0.493563	7.08798		0.493563	7.17994		0.658084	7.06592		0.493563	7.18793		0.493563	7.15884		0.493563	7.0676		0.493563	7.11764		0.493563	7.09136		0.493563	7.04049		0.493563	7.06128		0.493563	7.1158		0.493563	7.0436		0.493563	7.02372		0.493563	7.03652		0.493563	7.02491		0.493563	7.13648		0.493563
	0.494643	7.08774		0.494643	7.17893		0.659524	7.06733		0.494643	7.18844		0.494643	7.1591		0.494643	7.07055		0.494643	7.11633		0.494643	7.0915		0.494643	7.04324		0.494643	7.06244		0.494643	7.11909		0.494643	7.05146		0.494643	7.0192		0.494643	7.04693		0.494643	7.03443		0.494643	7.1361		0.494643
	0.495723	7.08681		0.495723	7.1767		0.660964	7.06936		0.495723	7.18736		0.495723	7.16086		0.495723	7.07424		0.495723	7.113		0.495723	7.09241		0.495723	7.04573		0.495723	7.06421		0.495723	7.12438		0.495723	7.05737		0.495723	7.0159		0.495723	7.05777		0.495723	7.04336		0.495723	7.13535		0.495723
	0.496803	7.08519		0.496803	7.17375		0.662404	7.07185		0.496803	7.18446		0.496803	7.16442		0.496803	7.07858		0.496803	7.10756		0.496803	7.09397		0.496803	7.04767		0.496803	7.06622		0.496803	7.13073		0.496803	7.06069		0.496803	7.01359		0.496803	7.06866		0.496803	7.0507		0.496803	7.13427		0.496803
	0.497883	7.08298		0.497883	7.17028		0.663844	7.07448		0.497883	7.17974		0.497883	7.16964		0.497883	7.08367		0.497883	7.10018		0.497883	7.09594		0.497883	7.04886		0.497883	7.0682		0.497883	7.13721		0.497883	7.06155		0.497883	7.01217		0.497883	7.07939		0.497883	7.05578		0.497883	7.13288		0.497883
	0.498963	7.08024		0.498963	7.16627		0.665284	7.07676		0.498963	7.17346		0.498963	7.17601		0.498963	7.08979		0.498963	7.09145		0.498963	7.09798		0.498963	7.04926		0.498963	7.0698		0.498963	7.14291		0.498963	7.06049		0.498963	7.01152		0.498963	7.08983		0.498963	7.05802		0.498963	7.13119		0.498963
	0.500043	7.07711		0.500043	7.16161		0.666724	7.0783		0.500043	7.16626		0.500043	7.1827		0.500043	7.09708		0.500043	7.08225		0.500043	7.0998		0.500043	7.04895		0.500043	7.07059		0.500043	7.14701		0.500043	7.05816		0.500043	7.01165		0.500043	7.09981		0.500043	7.05717		0.500043	7.12911		0.500043
	0.501123	7.07377		0.501123	7.1565		0.668164	7.07898		0.501123	7.15905		0.501123	7.18883		0.501123	7.10512		0.501123	7.07368		0.501123	7.1014		0.501123	7.04809		0.501123	7.07016		0.501123	7.14883		0.501123	7.05519		0.501123	7.01269		0.501123	7.1089		0.501123	7.05335		0.501123	7.12662		0.501123
	0.502203	7.07039		0.502203	7.15134		0.669604	7.07899		0.502203	7.15294		0.502203	7.19379		0.502203	7.11276		0.502203	7.06682		0.502203	7.10301		0.502203	7.04686		0.502203	7.06839		0.502203	7.14799		0.502203	7.05218		0.502203	7.01495		0.502203	7.11645		0.502203	7.04734		0.502203	7.12393		0.502203
	0.503283	7.06698		0.503283	7.14652		0.671044	7.0785		0.503283	7.14905		0.503283	7.19739		0.503283	7.11859		0.503283	7.0625		0.503283	7.10492		0.503283	7.04548		0.503283	7.06549		0.503283	7.14455		0.503283	7.04958		0.503283	7.01872		0.503283	7.12162		0.503283	7.04042		0.503283	7.12151		0.503283
	0.504363	7.06349		0.504363	7.14229		0.672484	7.07759		0.504363	7.14823		0.504363	7.19982		0.504363	7.12142		0.504363	7.06111		0.504363	7.10731		0.504363	7.0442		0.504363	7.06198		0.504363	7.13922		0.504363	7.04762		0.504363	7.02394		0.504363	7.12356		0.504363	7.03392		0.504363	7.1198		0.504363
	0.505443	7.0598		0.505443	7.13881		0.673924	7.07639		0.505443	7.15074		0.505443	7.20143		0.505443	7.12072		0.505443	7.06269		0.505443	7.11026		0.505443	7.04325		0.505443	7.0585		0.505443	7.13296		0.505443	7.04607		0.505443	7.03022		0.505443	7.12176		0.505443	7.02881		0.505443	7.11907		0.505443
	0.506523	7.05593		0.506523	7.13626		0.675364	7.07519		0.506523	7.15619		0.506523	7.20234		0.506523	7.11669		0.506523	7.06698		0.506523	7.11379		0.506523	7.04265		0.506523	7.05577		0.506523	7.12667		0.506523	7.04436		0.506523	7.03707		0.506523	7.11615		0.506523	7.02541		0.506523	7.11941		0.506523
	0.507603	7.05218		0.507603	7.13487		0.676804	7.07452		0.507603	7.16354		0.507603	7.20248		0.507603	7.11003		0.507603	7.07342		0.507603	7.11799		0.507603	7.04228		0.507603	7.05453		0.507603	7.12104		0.507603	7.04175		0.507603	7.04406		0.507603	7.10715		0.507603	7.02357		0.507603	7.12084		0.507603
	0.508683	7.04899		0.508683	7.13474		0.678244	7.07493		0.508683	7.17152		0.508683	7.2017		0.508683	7.10191		0.508683	7.08113		0.508683	7.12286		0.508683	7.04202		0.508683	7.05547		0.508683	7.11656		0.508683	7.03758		0.508683	7.05102		0.508683	7.09559		0.508683	7.02287		0.508683	7.12331		0.508683
	0.509763	7.04703		0.509763	7.13567		0.679684	7.07678		0.509763	7.17894		0.509763	7.19996		0.509763	7.09395		0.509763	7.08911		0.509763	7.12826		0.509763	7.04188		0.509763	7.05916		0.509763	7.1136		0.509763	7.03151		0.509763	7.05788		0.509763	7.08265		0.509763	7.02288		0.509763	7.12656		0.509763
	0.510843	7.04707		0.510843	7.13717		0.681124	7.08039		0.510843	7.18494		0.510843	7.19724		0.510843	7.08798		0.510843	7.09649		0.510843	7.13385		0.510843	7.04199		0.510843	7.06567		0.510843	7.11246		0.510843	7.02363		0.510843	7.06452		0.510843	7.06966		0.510843	7.02314		0.510843	7.13002		0.510843
	0.511923	7.04974		0.511923	7.13861		0.682564	7.08596		0.511923	7.18905		0.511923	7.1936		0.511923	7.08549		0.511923	7.10278		0.511923	7.13912		0.511923	7.04238		0.511923	7.0746		0.511923	7.11308		0.511923	7.01446		0.511923	7.07089		0.511923	7.05798		0.511923	7.02313		0.511923	7.13295		0.511923
	0.513003	7.05541		0.513003	7.13946		0.684004	7.09358		0.513003	7.1913		0.513003	7.18907		0.513003	7.08716		0.513003	7.10779		0.513003	7.14356		0.513003	7.04286		0.513003	7.08492		0.513003	7.11494		0.513003	7.00471		0.513003	7.07693		0.513003	7.04849		0.513003	7.02249		0.513003	7.13474		0.513003
	0.514083	7.06396		0.514083	7.13933		0.685444	7.103		0.514083	7.19209		0.514083	7.1839		0.514083	7.09271		0.514083	7.11137		0.514083	7.14684		0.514083	7.04316		0.514083	7.09539		0.514083	7.11731		0.514083	6.99515		0.514083	7.0826		0.514083	7.04162		0.514083	7.02121		0.514083	7.13494		0.514083
	0.515163	7.07474		0.515163	7.13795		0.686884	7.11344		0.515163	7.19215		0.515163	7.17859		0.515163	7.10113		0.515163	7.11337		0.515163	7.14887		0.515163	7.04306		0.515163	7.10473		0.515163	7.11954		0.515163	6.98661		0.515163	7.08761		0.515163	7.03739		0.515163	7.01978		0.515163	7.1334		0.515163
	0.516243	7.08668		0.516243	7.13507		0.688324	7.12361		0.516243	7.19219		0.516243	7.17374		0.516243	7.1111		0.516243	7.11378		0.516243	7.14977		0.516243	7.0425		0.516243	7.11194		0.516243	7.12136		0.516243	6.97983		0.516243	7.09136		0.516243	7.0357		0.516243	7.01907		0.516243	7.13006		0.516243
	0.517323	7.09845		0.517323	7.13069		0.689764	7.13198		0.517323	7.19266		0.517323	7.16986		0.517323	7.12123		0.517323	7.11289		0.517323	7.14975		0.517323	7.04163		0.517323	7.11629		0.517323	7.12287		0.517323	6.97554		0.517323	7.09299		0.517323	7.03635		0.517323	7.01977		0.517323	7.12504		0.517323
	0.518403	7.10877		0.518403	7.1252		0.691204	7.13701		0.518403	7.19358		0.518403	7.16714		0.518403	7.13026		0.518403	7.11125		0.518403	7.14903		0.518403	7.04075		0.518403	7.11735		0.518403	7.12432		0.518403	6.9741		0.518403	7.09171		0.518403	7.03897		0.518403	7.022		0.518403	7.11871		0.518403
	0.519483	7.11657		0.519483	7.11948		0.692644	7.1376		0.519483	7.19464		0.519483	7.16548		0.519483	7.13717		0.519483	7.10941		0.519483	7.1479		0.519483	7.04036		0.519483	7.11508		0.519483	7.12587		0.519483	6.97538		0.519483	7.08708		0.519483	7.04282		0.519483	7.02532		0.519483	7.11171		0.519483
	0.520563	7.12131		0.520563	7.11472		0.694084	7.13351		0.520563	7.19534		0.520563	7.1646		0.520563	7.14135		0.520563	7.10774		0.520563	7.14666		0.520563	7.041		0.520563	7.10992		0.520563	7.12768		0.520563	6.97885		0.520563	7.07927		0.520563	7.04702		0.520563	7.0292		0.520563	7.10487		0.520563
	0.521643	7.12286		0.521643	7.11197		0.695524	7.12546		0.521643	7.19514		0.521643	7.16415		0.521643	7.14267		0.521643	7.10659		0.521643	7.14551		0.521643	7.0431		0.521643	7.10263		0.521643	7.12992		0.521643	6.98382		0.521643	7.06902		0.521643	7.05075		0.521643	7.03329		0.521643	7.09898		0.521643
	0.522723	7.12164		0.522723	7.11194		0.696964	7.11497		0.522723	7.19369		0.522723	7.1638		0.522723	7.14138		0.522723	7.10635		0.522723	7.14443		0.522723	7.04676		0.522723	7.09415		0.522723	7.13285		0.522723	6.98985		0.522723	7.05758		0.522723	7.05339		0.522723	7.03754		0.522723	7.09464		0.522723
	0.523803	7.11843		0.523803	7.11506		0.698404	7.10399		0.523803	7.19081		0.523803	7.16328		0.523803	7.13796		0.523803	7.10733		0.523803	7.1432		0.523803	7.05181		0.523803	7.08537		0.523803	7.13651		0.523803	6.9967		0.523803	7.04635		0.523803	7.05437		0.523803	7.04195		0.523803	7.09218		0.523803
	0.524883	7.11421		0.524883	7.12157		0.699844	7.09447		0.524883	7.18663		0.524883	7.16236		0.524883	7.13298		0.524883	7.10951		0.524883	7.14155		0.524883	7.0579		0.524883	7.07706		0.524883	7.14039		0.524883	7.00424		0.524883	7.03658		0.524883	7.05316		0.524883	7.04657		0.524883	7.09168		0.524883
	0.525963	7.10988		0.525963	7.13133		0.701284	7.08821		0.525963	7.18135		0.525963	7.16094		0.525963	7.12708		0.525963	7.11243		0.525963	7.13934		0.525963	7.06457		0.525963	7.06992		0.525963	7.14353		0.525963	7.01228		0.525963	7.02905		0.525963	7.04944		0.525963	7.05153		0.525963	7.09301		0.525963
	0.527043	7.10616		0.527043	7.14354		0.702724	7.08651		0.527043	7.17516		0.527043	7.15907		0.527043	7.12094		0.527043	7.11549		0.527043	7.13654		0.527043	7.07128		0.527043	7.06454		0.527043	7.1449		0.527043	7.02065		0.527043	7.02411		0.527043	7.04342		0.527043	7.05715		0.527043	7.09579		0.527043
	0.528123	7.10346		0.528123	7.15681		0.704165	7.08977		0.528123	7.16825		0.528123	7.15694		0.528123	7.11514		0.528123	7.1182		0.528123	7.13315		0.528123	7.07747		0.528123	7.06123		0.528123	7.14389		0.528123	7.02907		0.528123	7.02174		0.528123	7.03589		0.528123	7.06386		0.528123	7.09948		0.528123
	0.529203	7.10201		0.529203	7.16952		0.705605	7.09723		0.529203	7.16093		0.529203	7.15473		0.529203	7.1101		0.529203	7.12028		0.529203	7.12926		0.529203	7.08272		0.529203	7.06		0.529203	7.14051		0.529203	7.03724		0.529203	7.02165		0.529203	7.02799		0.529203	7.07185		0.529203	7.10341		0.529203
	0.530283	7.10198		0.530283	7.18036		0.707045	7.10712		0.530283	7.15356		0.530283	7.15257		0.530283	7.10601		0.530283	7.12148		0.530283	7.12516		0.530283	7.08687		0.530283	7.06069		0.530283	7.1352		0.530283	7.04456		0.530283	7.02326		0.530283	7.02086		0.530283	7.08088		0.530283	7.10706		0.530283
	0.531363	7.10333		0.531363	7.18842		0.708485	7.11738		0.531363	7.14645		0.531363	7.15055		0.531363	7.10303		0.531363	7.12159		0.531363	7.12138		0.531363	7.08992		0.531363	7.06302		0.531363	7.12864		0.531363	7.05028		0.531363	7.02589		0.531363	7.01542		0.531363	7.09011		0.531363	7.11017		0.531363
	0.532443	7.10584		0.532443	7.19308		0.709925	7.12648		0.532443	7.13966		0.532443	7.14872		0.532443	7.10128		0.532443	7.1206		0.532443	7.11852		0.532443	7.09185		0.532443	7.06663		0.532443	7.1217		0.532443	7.05361		0.532443	7.02894		0.532443	7.01232		0.532443	7.09844		0.532443	7.11272		0.532443
	0.533523	7.10907		0.533523	7.19388		0.711365	7.13357		0.533523	7.13307		0.533523	7.1472		0.533523	7.10083		0.533523	7.11886		0.533523	7.11693		0.533523	7.09249		0.533523	7.07086		0.533523	7.11548		0.533523	7.05407		0.533523	7.03217		0.533523	7.01183		0.533523	7.10478		0.533523	7.11485		0.533523
	0.534603	7.11259		0.534603	7.19067		0.712805	7.13836		0.534603	7.12661		0.534603	7.14607		0.534603	7.10163		0.534603	7.11696		0.534603	7.11661		0.534603	7.09156		0.534603	7.07481		0.534603	7.11122		0.534603	7.05156		0.534603	7.03567		0.534603	7.01383		0.534603	7.10845		0.534603	7.11663		0.534603
	0.535683	7.11606		0.535683	7.18384		0.714245	7.14089		0.535683	7.12039		0.535683	7.1453		0.535683	7.10346		0.535683	7.11547		0.535683	7.11731		0.535683	7.08881		0.535683	7.07752		0.535683	7.10984		0.535683	7.04651		0.535683	7.03962		0.535683	7.01778		0.535683	7.10923		0.535683	7.11811		0.535683
	0.536763	7.11919		0.536763	7.1743		0.715685	7.1417		0.536763	7.11459		0.536763	7.14483		0.536763	7.10596		0.536763	7.11465		0.536763	7.11873		0.536763	7.08417		0.536763	7.0783		0.536763	7.1116		0.536763	7.03983		0.536763	7.04402		0.536763	7.02288		0.536763	7.10725		0.536763	7.11932		0.536763
	0.537843	7.12153		0.537843	7.16319		0.717125	7.14185		0.537843	7.10938		0.537843	7.14468		0.537843	7.10877		0.537843	7.11462		0.537843	7.12054		0.537843	7.07784		0.537843	7.07687		0.537843	7.11589		0.537843	7.03265		0.537843	7.04854		0.537843	7.02829		0.537843	7.10282		0.537843	7.12032		0.537843
	0.538923	7.12261		0.538923	7.15157		0.718565	7.14282		0.538923	7.10489		0.538923	7.14506		0.538923	7.11154		0.538923	7.11542		0.538923	7.12231		0.538923	7.07034		0.538923	7.07322		0.538923	7.12159		0.538923	7.02612		0.538923	7.05265		0.538923	7.03335		0.538923	7.09649		0.538923	7.12107		0.538923
	0.540003	7.12208		0.540003	7.14032		0.720005	7.1457		0.540003	7.10133		0.540003	7.14627		0.540003	7.11395		0.540003	7.11707		0.540003	7.12349		0.540003	7.06248		0.540003	7.06745		0.540003	7.12756		0.540003	7.02113		0.540003	7.05591		0.540003	7.03785		0.540003	7.08904		0.540003	7.12131		0.540003
	0.541083	7.11997		0.541083	7.13021		0.721445	7.1507		0.541083	7.09903		0.541083	7.14843		0.541083	7.1156		0.541083	7.11936		0.541083	7.12362		0.541083	7.05529		0.541083	7.05985		0.541083	7.13289		0.541083	7.01823		0.541083	7.05811		0.541083	7.04185		0.541083	7.08137		0.541083	7.12067		0.541083
	0.542163	7.11661		0.542163	7.1219		0.722885	7.1572		0.542163	7.0983		0.542163	7.1515		0.542163	7.11605		0.542163	7.12181		0.542163	7.12256		0.542163	7.04982		0.542163	7.05097		0.542163	7.13697		0.542163	7.01762		0.542163	7.05932		0.542163	7.04567		0.542163	7.07415		0.542163	7.11896		0.542163
	0.543243	7.11243		0.543243	7.11589		0.724325	7.16437		0.543243	7.09927		0.543243	7.15537		0.543243	7.11485		0.543243	7.12371		0.543243	7.12061		0.543243	7.04693		0.543243	7.04164		0.543243	7.13941		0.543243	7.01905		0.543243	7.05977		0.543243	7.04955		0.543243	7.06767		0.543243	7.11639		0.543243
	0.544323	7.10779		0.544323	7.11226		0.725765	7.17146		0.544323	7.10189		0.544323	7.15999		0.544323	7.11183		0.544323	7.12434		0.544323	7.11825		0.544323	7.04701		0.544323	7.03286		0.544323	7.14007		0.544323	7.02183		0.544323	7.05975		0.544323	7.05356		0.544323	7.06194		0.544323	7.11357		0.544323
	0.545403	7.10307		0.545403	7.1107		0.727205	7.17788		0.545403	7.10586		0.545403	7.16525		0.545403	7.10729		0.545403	7.12321		0.545403	7.11577		0.545403	7.04981		0.545403	7.0254		0.545403	7.13906		0.545403	7.02505		0.545403	7.05963		0.545403	7.05758		0.545403	7.05699		0.545403	7.11126		0.545403
	0.546483	7.09891		0.546483	7.11066		0.728645	7.1829		0.546483	7.11075		0.546483	7.17077		0.546483	7.10186		0.546483	7.12016		0.546483	7.11319		0.546483	7.05461		0.546483	7.01975		0.546483	7.13686		0.546483	7.02791		0.546483	7.05994		0.546483	7.06131		0.546483	7.05295		0.546483	7.11013		0.546483
	0.547564	7.09614		0.547564	7.11163		0.730085	7.18561		0.547564	7.11611		0.547564	7.17586		0.547564	7.09625		0.547564	7.11541		0.547564	7.11046		0.547564	7.06044		0.547564	7.01622		0.547564	7.1341		0.547564	7.02986		0.547564	7.06124		0.547564	7.06432		0.547564	7.04995		0.547564	7.11063		0.547564
	0.548644	7.09552		0.548644	7.11326		0.731525	7.1855		0.548644	7.12163		0.548644	7.17976		0.548644	7.09094		0.548644	7.10962		0.548644	7.10769		0.548644	7.06632		0.548644	7.01511		0.548644	7.13128		0.548644	7.03055		0.548644	7.06382		0.548644	7.06593		0.548644	7.04802		0.548644	7.11303		0.548644
	0.549724	7.09746		0.549724	7.11531		0.732965	7.18283		0.549724	7.12728		0.549724	7.18187		0.549724	7.08622		0.549724	7.10368		0.549724	7.10509		0.549724	7.07138		0.549724	7.01674		0.549724	7.12865		0.549724	7.02968		0.549724	7.06745		0.549724	7.06539		0.549724	7.04718		0.549724	7.11744		0.549724
	0.550804	7.10188		0.550804	7.11763		0.734405	7.17851		0.550804	7.13329		0.550804	7.18195		0.550804	7.08231		0.550804	7.09863		0.550804	7.10291		0.550804	7.07501		0.550804	7.02127		0.550804	7.12615		0.550804	7.02705		0.550804	7.07133		0.550804	7.06217		0.550804	7.04755		0.550804	7.12373		0.550804
	0.551884	7.1083		0.551884	7.12026		0.735845	7.17367		0.551884	7.13974		0.551884	7.17996		0.551884	7.07932		0.551884	7.09544		0.551884	7.10112		0.551884	7.07692		0.551884	7.02839		0.551884	7.12364		0.551884	7.02277		0.551884	7.07446		0.551884	7.05617		0.551884	7.04922		0.551884	7.1313		0.551884
	0.552964	7.11612		0.552964	7.12347		0.737285	7.16912		0.552964	7.14639		0.552964	7.17601		0.552964	7.07707		0.552964	7.09491		0.552964	7.09962		0.552964	7.0773		0.552964	7.03742		0.552964	7.12116		0.552964	7.01733		0.552964	7.07602		0.552964	7.04786		0.552964	7.05205		0.552964	7.13915		0.552964
	0.554044	7.12463		0.554044	7.12772		0.738725	7.16535		0.554044	7.1527		0.554044	7.17043		0.554044	7.07505		0.554044	7.09727		0.554044	7.09841		0.554044	7.07667		0.554044	7.04741		0.554044	7.11881		0.554044	7.01128		0.554044	7.07546		0.554044	7.03814		0.554044	7.05565		0.554044	7.14612		0.554044
	0.555124	7.13285		0.555124	7.13331		0.740165	7.16282		0.555124	7.15809		0.555124	7.16381		0.555124	7.07251		0.555124	7.10208		0.555124	7.09778		0.555124	7.07561		0.555124	7.0573		0.555124	7.11673		0.555124	7.00502		0.555124	7.07252		0.555124	7.02826		0.555124	7.05961		0.555124	7.1513		0.555124
	0.556204	7.13973		0.556204	7.1401		0.741605	7.16199		0.556204	7.16212		0.556204	7.15683		0.556204	7.06905		0.556204	7.10827		0.556204	7.09802		0.556204	7.0744		0.556204	7.06594		0.556204	7.11492		0.556204	6.99876		0.556204	7.06712		0.556204	7.01969		0.556204	7.06359		0.556204	7.15427		0.556204
	0.557284	7.14435		0.557284	7.1475		0.743045	7.16312		0.557284	7.16444		0.557284	7.15015		0.557284	7.06475		0.557284	7.11437		0.557284	7.09929		0.557284	7.07306		0.557284	7.07216		0.557284	7.11328		0.557284	6.99276		0.557284	7.05947		0.557284	7.01392		0.557284	7.06732		0.557284	7.1551		0.557284
	0.558364	7.14633		0.558364	7.15467		0.744485	7.166		0.558364	7.16469		0.558364	7.14436		0.558364	7.06009		0.558364	7.119		0.558364	7.10145		0.558364	7.07146		0.558364	7.07505		0.558364	7.11173		0.558364	6.98748		0.558364	7.05022		0.558364	7.01231		0.558364	7.07043		0.558364	7.15411		0.558364
	0.559444	7.146		0.559444	7.16076		0.745925	7.16992		0.559444	7.16276		0.559444	7.13996		0.559444	7.05574		0.559444	7.12123		0.559444	7.10422		0.559444	7.06949		0.559444	7.0743		0.559444	7.11039		0.559444	6.98354		0.559444	7.04056		0.559444	7.01568		0.559444	7.07245		0.559444	7.15166		0.559444
	0.560524	7.14408		0.560524	7.1651		0.747365	7.17395		0.560524	7.1591		0.560524	7.13728		0.560524	7.05237		0.560524	7.12072		0.560524	7.10739		0.560524	7.06705		0.560524	7.07031		0.560524	7.10946		0.560524	6.98149		0.560524	7.03193		0.560524	7.02406		0.560524	7.07301		0.560524	7.14817		0.560524
	0.561604	7.14136		0.561604	7.16723		0.748805	7.17736		0.561604	7.15464		0.561604	7.13635		0.561604	7.05065		0.561604	7.11784		0.561604	7.11071		0.561604	7.06405		0.561604	7.06415		0.561604	7.10908		0.561604	6.98161		0.561604	7.02562		0.561604	7.0367		0.561604	7.07191		0.561604	7.14419		0.561604
	0.562684	7.13845		0.562684	7.16704		0.750245	7.17967		0.562684	7.15042		0.562684	7.13674		0.562684	7.05114		0.562684	7.11341		0.562684	7.11381		0.562684	7.06047		0.562684	7.05727		0.562684	7.10926		0.562684	6.98399		0.562684	7.02248		0.562684	7.05206		0.562684	7.06916		0.562684	7.14025		0.562684
	0.563764	7.13571		0.563764	7.16491		0.751685	7.1806		0.563764	7.14702		0.563764	7.13788		0.563764	7.05422		0.563764	7.10852		0.563764	7.11622		0.563764	7.05655		0.563764	7.05132		0.563764	7.10983		0.563764	6.98869		0.563764	7.0228		0.563764	7.06818		0.563764	7.06496		0.563764	7.13664		0.563764
	0.564844	7.13331		0.564844	7.16164		0.753125	7.17999		0.564844	7.14439		0.564844	7.13924		0.564844	7.05976		0.564844	7.10421		0.564844	7.11752		0.564844	7.05278		0.564844	7.0479		0.564844	7.11063		0.564844	6.9957		0.564844	7.02651		0.564844	7.08303		0.564844	7.05967		0.564844	7.13319		0.564844
	0.565924	7.13114		0.565924	7.15821		0.754565	7.17788		0.565924	7.14226		0.565924	7.14049		0.565924	7.06713		0.565924	7.10137		0.565924	7.11749		0.565924	7.04985		0.565924	7.0482		0.565924	7.11163		0.565924	7.00481		0.565924	7.03328		0.565924	7.09487		0.565924	7.05398		0.565924	7.12936		0.565924
	0.567004	7.12878		0.567004	7.15554		0.756005	7.17453		0.567004	7.1405		0.567004	7.14135		0.567004	7.07536		0.567004	7.10053		0.567004	7.11618		0.567004	7.04843		0.567004	7.0527		0.567004	7.11287		0.567004	7.01531		0.567004	7.04251		0.567004	7.10237		0.567004	7.04888		0.567004	7.12455		0.567004
	0.568084	7.12556		0.568084	7.15414		0.757445	7.17032		0.568084	7.13907		0.568084	7.14147		0.568084	7.08342		0.568084	7.10182		0.568084	7.11378		0.568084	7.04891		0.568084	7.06092		0.568084	7.11426		0.568084	7.02606		0.568084	7.05317		0.568084	7.10474		0.568084	7.04547		0.568084	7.11841		0.568084
	0.569164	7.1211		0.569164	7.1541		0.758885	7.16556		0.569164	7.13791		0.569164	7.14052		0.569164	7.09047		0.569164	7.10477		0.569164	7.11049		0.569164	7.05128		0.569164	7.07159		0.569164	7.1156		0.569164	7.03585		0.569164	7.06391		0.569164	7.10178		0.569164	7.04471		0.569164	7.11094		0.569164
	0.570244	7.11554		0.570244	7.15506		0.760325	7.1605		0.570244	7.13684		0.570244	7.1385		0.570244	7.09605		0.570244	7.10849		0.570244	7.10648		0.570244	7.05529		0.570244	7.08301		0.570244	7.11667		0.570244	7.04377		0.570244	7.0734		0.570244	7.09392		0.570244	7.04712		0.570244	7.10252		0.570244
	0.571324	7.10964		0.571324	7.15644		0.761765	7.15547		0.571324	7.13588		0.571324	7.13593		0.571324	7.09994		0.571324	7.11187		0.571324	7.10192		0.571324	7.06059		0.571324	7.09333		0.571324	7.11741		0.571324	7.04933		0.571324	7.08069		0.571324	7.08223		0.571324	7.05262		0.571324	7.09372		0.571324
	0.572404	7.10446		0.572404	7.15758		0.763205	7.15084		0.572404	7.13538		0.572404	7.13349		0.572404	7.10219		0.572404	7.11406		0.572404	7.09717		0.572404	7.06686		0.572404	7.10091		0.572404	7.11801		0.572404	7.05235		0.572404	7.0853		0.572404	7.06808		0.572404	7.06058		0.572404	7.08516		0.572404
	0.573484	7.10102		0.573484	7.15789		0.764645	7.14693		0.573484	7.13581		0.573484	7.13168		0.573484	7.10307		0.573484	7.11456		0.573484	7.09255		0.573484	7.07387		0.573484	7.10454		0.573484	7.11864		0.573484	7.05285		0.573484	7.08712		0.573484	7.05284		0.573484	7.06986		0.573484	7.07754		0.573484
	0.574564	7.0999		0.574564	7.15703		0.766085	7.1439		0.574564	7.13733		0.574564	7.13068		0.574564	7.10297		0.574564	7.11319		0.574564	7.0884		0.574564	7.08135		0.574564	7.10368		0.574564	7.11918		0.574564	7.05115		0.574564	7.08613		0.574564	7.03764		0.574564	7.07908		0.574564	7.07166		0.574564
	0.575644	7.10134		0.575644	7.15502		0.767525	7.14185		0.575644	7.1396		0.575644	7.13046		0.575644	7.10231		0.575644	7.10996		0.575644	7.08483		0.575644	7.08895		0.575644	7.09858		0.575644	7.11932		0.575644	7.04805		0.575644	7.08246		0.575644	7.02335		0.575644	7.08684		0.575644	7.06825		0.575644
	0.576724	7.10515		0.576724	7.15218		0.768965	7.14097		0.576724	7.14197		0.576724	7.131		0.576724	7.10142		0.576724	7.10511		0.576724	7.08193		0.576724	7.09631		0.576724	7.09027		0.576724	7.11866		0.576724	7.04454		0.576724	7.07657		0.576724	7.01084		0.576724	7.09212		0.576724	7.06778		0.576724
	0.577804	7.11074		0.577804	7.14906		0.770405	7.14171		0.577804	7.14393		0.577804	7.13237		0.577804	7.10043		0.577804	7.09916		0.577804	7.07991		0.577804	7.10307		0.577804	7.08023		0.577804	7.11707		0.577804	7.0415		0.577804	7.0693		0.577804	7.00093		0.577804	7.09451		0.577804	7.07018		0.577804
	0.578884	7.11715		0.578884	7.1463		0.771845	7.14437		0.578884	7.14536		0.578884	7.13449		0.578884	7.09932		0.578884	7.09303		0.578884	7.07906		0.578884	7.10878		0.578884	7.07007		0.578884	7.11464		0.578884	7.03932		0.578884	7.06156		0.578884	6.99432		0.578884	7.09425		0.578884	7.07476		0.578884
	0.579964	7.12327		0.579964	7.14437		0.773285	7.14887		0.579964	7.14638		0.579964	7.13712		0.579964	7.09803		0.579964	7.08763		0.579964	7.07965		0.579964	7.11276		0.579964	7.06111		0.579964	7.11156		0.579964	7.03802		0.579964	7.05411		0.579964	6.99142		0.579964	7.09213		0.579964	7.08059		0.579964
	0.581044	7.12829		0.581044	7.14351		0.774725	7.15475		0.581044	7.14716		0.581044	7.1399		0.581044	7.0965		0.581044	7.08368		0.581044	7.08169		0.581044	7.11415		0.581044	7.05424		0.581044	7.10799		0.581044	7.03749		0.581044	7.04727		0.581044	6.99233		0.581044	7.08919		0.581044	7.08674		0.581044
	0.582124	7.13198		0.582124	7.14371		0.776165	7.16149		0.582124	7.1478		0.582124	7.14247		0.582124	7.09475		0.582124	7.08157		0.582124	7.08499		0.582124	7.11217		0.582124	7.04983		0.582124	7.10417		0.582124	7.03759		0.582124	7.04113		0.582124	6.99689		0.582124	7.0865		0.582124	7.09249		0.582124
	0.583204	7.13462		0.583204	7.14459		0.777605	7.16885		0.583204	7.14839		0.583204	7.14465		0.583204	7.09282		0.583204	7.08137		0.583204	7.08922		0.583204	7.10648		0.583204	7.04774		0.583204	7.10045		0.583204	7.03807		0.583204	7.03561		0.583204	7.00477		0.583204	7.0849		0.583204	7.09731		0.583204
	0.584284	7.13664		0.584284	7.14556		0.779045	7.17675		0.584284	7.14903		0.584284	7.14638		0.584284	7.09081		0.584284	7.08293		0.584284	7.09415		0.584284	7.09721		0.584284	7.04739		0.584284	7.09723		0.584284	7.03853		0.584284	7.03049		0.584284	7.01537		0.584284	7.08482		0.584284	7.10079		0.584284
	0.585364	7.13831		0.585364	7.14593		0.780485	7.18509		0.585364	7.14982		0.585364	7.14775		0.585364	7.08888		0.585364	7.0859		0.585364	7.09961		0.585364	7.08491		0.585364	7.04783		0.585364	7.09494		0.585364	7.03869		0.585364	7.02547		0.585364	7.02766		0.585364	7.08606		0.585364	7.10288		0.585364
	0.586444	7.13962		0.586444	7.14513		0.781925	7.19363		0.586444	7.15078		0.586444	7.1488		0.586444	7.08727		0.586444	7.08959		0.586444	7.10537		0.586444	7.07045		0.586444	7.04811		0.586444	7.09384		0.586444	7.03856		0.586444	7.02018		0.586444	7.04032		0.586444	7.08803		0.586444	7.10406		0.586444
	0.587524	7.14043		0.587524	7.14296		0.783365	7.2022		0.587524	7.15177		0.587524	7.14951		0.587524	7.08619		0.587524	7.09319		0.587524	7.11112		0.587524	7.055		0.587524	7.0475		0.587524	7.09396		0.587524	7.03836		0.587524	7.01435		0.587524	7.052		0.587524	7.08986		0.587524	7.10526		0.587524
	0.588604	7.1404		0.588604	7.13962		0.784805	7.21084		0.588604	7.15261		0.588604	7.14985		0.588604	7.08572		0.588604	7.09602		0.588604	7.11646		0.588604	7.03984		0.588604	7.04575		0.588604	7.09511		0.588604	7.03831		0.588604	7.008		0.588604	7.06174		0.588604	7.09075		0.588604	7.10745		0.588604
	0.589684	7.13905		0.589684	7.13554		0.786245	7.21985		0.589684	7.15331		0.589684	7.15006		0.589684	7.08578		0.589684	7.09773		0.589684	7.12099		0.589684	7.02626		0.589684	7.04295		0.589684	7.09704		0.589684	7.03839		0.589684	7.00153		0.589684	7.069		0.589684	7.09007		0.589684	7.11116		0.589684
	0.590764	7.13581		0.590764	7.13125		0.787685	7.22951		0.590764	7.15426		0.590764	7.15067		0.590764	7.0862		0.590764	7.09812		0.590764	7.12441		0.590764	7.01513		0.590764	7.03939		0.590764	7.09952		0.590764	7.03843		0.590764	6.9956		0.590764	7.07368		0.590764	7.08748		0.590764	7.11642		0.590764
	0.591844	7.13037		0.591844	7.12724		0.789125	7.23979		0.591844	7.15599		0.591844	7.15226		0.591844	7.08685		0.591844	7.09701		0.591844	7.12645		0.591844	7.00689		0.591844	7.0354		0.591844	7.10237		0.591844	7.03823		0.591844	6.99107		0.591844	7.07603		0.591844	7.08293		0.591844	7.12287		0.591844
	0.592924	7.12292		0.592924	7.12395		0.790565	7.25031		0.592924	7.15886		0.592924	7.15516		0.592924	7.08779		0.592924	7.09424		0.592924	7.12695		0.592924	7.0016		0.592924	7.03148		0.592924	7.10533		0.592924	7.03758		0.592924	6.98879		0.592924	7.07672		0.592924	7.07672		0.592924	7.12991		0.592924
	0.594004	7.11414		0.594004	7.12169		0.792005	7.26059		0.594004	7.16276		0.594004	7.1592		0.594004	7.08913		0.594004	7.08988		0.594004	7.12587		0.594004	6.99909		0.594004	7.02822		0.594004	7.10786		0.594004	7.03618		0.594004	6.98937		0.594004	7.07676		0.594004	7.06932		0.594004	7.13671		0.594004
	0.595084	7.10503		0.595084	7.12052		0.793445	7.27031		0.595084	7.16704		0.595084	7.16397		0.595084	7.09095		0.595084	7.08439		0.595084	7.12336		0.595084	6.99907		0.595084	7.02635		0.595084	7.10937		0.595084	7.03371		0.595084	6.99309		0.595084	7.07732		0.595084	7.06129		0.595084	7.1423		0.595084
	0.596164	7.09663		0.596164	7.12		0.794885	7.27918		0.596164	7.1708		0.596164	7.169		0.596164	7.09327		0.596164	7.07841		0.596164	7.11968		0.596164	7.00111		0.596164	7.02632		0.596164	7.10945		0.596164	7.02995		0.596164	6.99976		0.596164	7.0793		0.596164	7.05316		0.596164	7.14592		0.596164
	0.597244	7.0899		0.597244	7.11935		0.796325	7.28688		0.597244	7.17315		0.597244	7.17381		0.597244	7.0961		0.597244	7.07253		0.597244	7.11521		0.597244	7.00471		0.597244	7.02815		0.597244	7.1082		0.597244	7.02509		0.597244	7.00878		0.597244	7.08312		0.597244	7.04535		0.597244	7.1472		0.597244
	0.598324	7.08551		0.598324	7.11781		0.797765	7.29292		0.598324	7.17334		0.598324	7.17778		0.598324	7.09941		0.598324	7.06715		0.598324	7.11042		0.598324	7.00927		0.598324	7.03141		0.598324	7.10607		0.598324	7.01968		0.598324	7.01928		0.598324	7.08875		0.598324	7.03829		0.598324	7.14629		0.598324
	0.599404	7.08376		0.599404	7.11501		0.799205	7.2969		0.599404	7.17089		0.599404	7.18012		0.599404	7.10305		0.599404	7.06281		0.599404	7.10587		0.599404	7.01429		0.599404	7.03546		0.599404	7.10365		0.599404	7.0144		0.599404	7.03012		0.599404	7.09579		0.599404	7.03229		0.599404	7.14365		0.599404
	0.600484	7.08435		0.600484	7.11128		0.800645	7.29878		0.600484	7.16584		0.600484	7.18028		0.600484	7.10665		0.600484	7.06026		0.600484	7.10208		0.600484	7.01931		0.600484	7.03967		0.600484	7.10148		0.600484	7.00988		0.600484	7.04026		0.600484	7.10358		0.600484	7.02763		0.600484	7.13984		0.600484
	0.601564	7.08656		0.601564	7.10731		0.802085	7.29901		0.601564	7.15875		0.601564	7.17831		0.601564	7.10964		0.601564	7.06028		0.601564	7.09937		0.601564	7.0239		0.601564	7.04353		0.601564	7.10005		0.601564	7.00664		0.601564	7.04886		0.601564	7.1111		0.601564	7.02465		0.601564	7.13533		0.601564
	0.602644	7.08948		0.602644	7.10393		0.803525	7.29816		0.602644	7.15073		0.602644	7.17483		0.602644	7.11148		0.602644	7.06329		0.602644	7.09765		0.602644	7.02773		0.602644	7.04665		0.602644	7.0999		0.602644	7.00511		0.602644	7.05544		0.602644	7.11717		0.602644	7.02362		0.602644	7.13052		0.602644
	0.603724	7.09238		0.603724	7.10184		0.804965	7.2966		0.603724	7.14314		0.603724	7.17068		0.603724	7.11183		0.603724	7.06912		0.603724	7.09665		0.603724	7.03058		0.603724	7.04872		0.603724	7.10128		0.603724	7.00552		0.603724	7.05993		0.603724	7.1206		0.603724	7.02462		0.603724	7.12562		0.603724
	0.604804	7.09471		0.604804	7.1017		0.806405	7.29465		0.604804	7.13714		0.604804	7.1666		0.604804	7.11059		0.604804	7.0771		0.604804	7.09623		0.604804	7.03242		0.604804	7.04966		0.604804	7.10407		0.604804	7.0078		0.604804	7.06251		0.604804	7.12043		0.604804	7.02741		0.604804	7.12063		0.604804
	0.605884	7.09622		0.605884	7.10403		0.807845	7.29284		0.605884	7.1336		0.605884	7.16308		0.605884	7.10791		0.605884	7.0865		0.605884	7.09655		0.605884	7.03356		0.605884	7.04979		0.605884	7.10763		0.605884	7.01144		0.605884	7.06347		0.605884	7.11607		0.605884	7.03145		0.605884	7.11535		0.605884
	0.606964	7.09692		0.606964	7.10904		0.809285	7.29194		0.606964	7.13291		0.606964	7.1606		0.606964	7.1041		0.606964	7.09658		0.606964	7.09788		0.606964	7.03458		0.606964	7.04978		0.606964	7.11117		0.606964	7.01561		0.606964	7.06311		0.606964	7.10749		0.606964	7.03615		0.606964	7.10954		0.606964
	0.608044	7.09712		0.608044	7.1162		0.810725	7.29272		0.608044	7.13503		0.608044	7.15948		0.608044	7.09962		0.608044	7.10666		0.608044	7.10016		0.608044	7.03614		0.608044	7.05042		0.608044	7.11407		0.608044	7.01943		0.608044	7.06165		0.608044	7.09521		0.608044	7.0411		0.608044	7.10319		0.608044
	0.609124	7.09729		0.609124	7.12423		0.812165	7.2955		0.609124	7.13946		0.609124	7.15978		0.609124	7.0951		0.609124	7.11611		0.609124	7.10298		0.609124	7.03887		0.609124	7.05231		0.609124	7.11603		0.609124	7.0222		0.609124	7.05919		0.609124	7.08012		0.609124	7.04606		0.609124	7.09669		0.609124
	0.610204	7.09783		0.610204	7.13164		0.813605	7.30016		0.610204	7.14531		0.610204	7.16109		0.610204	7.09122		0.610204	7.12446		0.610204	7.1057		0.610204	7.0431		0.610204	7.05562		0.610204	7.1171		0.610204	7.02341		0.610204	7.05577		0.610204	7.06332		0.610204	7.05084		0.610204	7.09073		0.610204
	0.611284	7.09884		0.611284	7.13739		0.815045	7.30649		0.611284	7.1515		0.611284	7.16276		0.611284	7.0886		0.611284	7.13159		0.611284	7.10786		0.611284	7.04885		0.611284	7.06004		0.611284	7.11758		0.611284	7.02277		0.611284	7.05141		0.611284	7.04604		0.611284	7.05522		0.611284	7.08613		0.611284
	0.612364	7.10008		0.612364	7.14109		0.816485	7.31445		0.612364	7.15707		0.612364	7.16422		0.612364	7.08776		0.612364	7.13764		0.612364	7.10918		0.612364	7.05582		0.612364	7.06492		0.612364	7.11786		0.612364	7.02027		0.612364	7.04631		0.612364	7.02974		0.612364	7.05898		0.612364	7.08375		0.612364
	0.613444	7.10115		0.613444	7.1429		0.817925	7.32415		0.613444	7.16141		0.613444	7.16526		0.613444	7.08886		0.613444	7.14279		0.613444	7.10943		0.613444	7.06346		0.613444	7.06956		0.613444	7.11838		0.613444	7.01628		0.613444	7.0409		0.613444	7.01613		0.613444	7.06198		0.613444	7.08427		0.613444
	0.614524	7.10156		0.614524	7.14315		0.819365	7.33565		0.614524	7.16418		0.614524	7.16595		0.614524	7.09173		0.614524	7.14696		0.614524	7.10834		0.614524	7.07099		0.614524	7.07341		0.614524	7.11961		0.614524	7.01168		0.614524	7.03587		0.614524	7.00675		0.614524	7.064		0.614524	7.08815		0.614524
	0.615604	7.10087		0.615604	7.14222		0.820805	7.34897		0.615604	7.16525		0.615604	7.16642		0.615604	7.09582		0.615604	7.14986		0.615604	7.10579		0.615604	7.07768		0.615604	7.0761		0.615604	7.12179		0.615604	7.00747		0.615604	7.03204		0.615604	7.00239		0.615604	7.06467		0.615604	7.09547		0.615604
	0.616684	7.09897		0.616684	7.14083		0.822245	7.36408		0.616684	7.16462		0.616684	7.1668		0.616684	7.10031		0.616684	7.15117		0.616684	7.10219		0.616684	7.08294		0.616684	7.07741		0.616684	7.12488		0.616684	7.00459		0.616684	7.03009		0.616684	7.00285		0.616684	7.06351		0.616684	7.10588		0.616684
	0.617764	7.09628		0.617764	7.13991		0.823685	7.38112		0.617764	7.16245		0.617764	7.16724		0.617764	7.10427		0.617764	7.15065		0.617764	7.09846		0.617764	7.08649		0.617764	7.07724		0.617764	7.12854		0.617764	7.00362		0.617764	7.03048		0.617764	7.00717		0.617764	7.06012		0.617764	7.11864		0.617764
	0.618844	7.09363		0.618844	7.1403		0.825125	7.40035		0.618844	7.15915		0.618844	7.16803		0.618844	7.10685		0.618844	7.14824		0.618844	7.09588		0.618844	7.08833		0.618844	7.07574		0.618844	7.13223		0.618844	7.00473		0.618844	7.03331		0.618844	7.01414		0.618844	7.05445		0.618844	7.13275		0.618844
	0.619924	7.09199		0.619924	7.14229		0.826565	7.42202		0.619924	7.15526		0.619924	7.16935		0.619924	7.1075		0.619924	7.14392		0.619924	7.09557		0.619924	7.08878		0.619924	7.07332		0.619924	7.13545		0.619924	7.0078		0.619924	7.03833		0.619924	7.02249		0.619924	7.04692		0.619924	7.14703		0.619924
	0.621004	7.09208		0.621004	7.14554		0.828005	7.4463		0.621004	7.15127		0.621004	7.17125		0.621004	7.10599		0.621004	7.13777		0.621004	7.09816		0.621004	7.08829		0.621004	7.07063		0.621004	7.13795		0.621004	7.0125		0.621004	7.04486		0.621004	7.03081		0.621004	7.03844		0.621004	7.1602		0.621004
	0.622084	7.0942		0.622084	7.14939		0.829445	7.47309		0.622084	7.14749		0.622084	7.17342		0.622084	7.10258		0.622084	7.13006		0.622084	7.10369		0.622084	7.08734		0.622084	7.06826		0.622084	7.13957		0.622084	7.01828		0.622084	7.05205		0.622084	7.03765		0.622084	7.03015		0.622084	7.17102		0.622084
	0.623164	7.09832		0.623164	7.15323		0.830885	7.50204		0.623164	7.14419		0.623164	7.17546		0.623164	7.09783		0.623164	7.12124		0.623164	7.11166		0.623164	7.08634		0.623164	7.06643		0.623164	7.14026		0.623164	7.02444		0.623164	7.05894		0.623164	7.04187		0.623164	7.02317		0.623164	7.17858		0.623164
	0.624244	7.10407		0.624244	7.15672		0.832325	7.53267		0.624244	7.14155		0.624244	7.17695		0.624244	7.09257		0.624244	7.11184		0.624244	7.12122		0.624244	7.08536		0.624244	7.06505		0.624244	7.14007		0.624244	7.03022		0.624244	7.0649		0.624244	7.04323		0.624244	7.01846		0.624244	7.18241		0.624244
	0.625324	7.1107		0.625324	7.15968		0.833765	7.56454		0.625324	7.13978		0.625324	7.17762		0.625324	7.0877		0.625324	7.10216		0.625324	7.13129		0.625324	7.0842		0.625324	7.06394		0.625324	7.13913		0.625324	7.03504		0.625324	7.06959		0.625324	7.04243		0.625324	7.01663		0.625324	7.18247		0.625324
	0.626404	7.11717		0.626404	7.16199		0.835205	7.59728		0.626404	7.13905		0.626404	7.17738		0.626404	7.08401		0.626404	7.09227		0.626404	7.14062		0.626404	7.08246		0.626404	7.0631		0.626404	7.13779		0.626404	7.03857		0.626404	7.07293		0.626404	7.0407		0.626404	7.0179		0.626404	7.17897		0.626404
	0.627484	7.12247		0.627484	7.16352		0.836645	7.63062		0.627484	7.13943		0.627484	7.17624		0.627484	7.08202		0.627484	7.08212		0.627484	7.14794		0.627484	7.07968		0.627484	7.06263		0.627484	7.13633		0.627484	7.04089		0.627484	7.07481		0.627484	7.03925		0.627484	7.02202		0.627484	7.17225		0.627484
	0.628564	7.1261		0.628564	7.16425		0.838085	7.66435		0.628564	7.14099		0.628564	7.17434		0.628564	7.08184		0.628564	7.07196		0.628564	7.15221		0.628564	7.07562		0.628564	7.06256		0.628564	7.13496		0.628564	7.04235		0.628564	7.0752		0.628564	7.03887		0.628564	7.02838		0.628564	7.1628		0.628564
	0.629644	7.12823		0.629644	7.1643		0.839525	7.69834		0.629644	7.14372		0.629644	7.17182		0.629644	7.08309		0.629644	7.06236		0.629644	7.15297		0.629644	7.07018		0.629644	7.06278		0.629644	7.13363		0.629644	7.04333		0.629644	7.07418		0.629644	7.03993		0.629644	7.03602		0.629644	7.1513		0.629644
	0.630724	7.12949		0.630724	7.16397		0.840965	7.73273		0.630724	7.14741		0.630724	7.16881		0.630724	7.08503		0.630724	7.05405		0.630724	7.15055		0.630724	7.06342		0.630724	7.06317		0.630724	7.1323		0.630724	7.04404		0.630724	7.07199		0.630724	7.04241		0.630724	7.04384		0.630724	7.13862		0.630724
	0.631804	7.13061		0.631804	7.16349		0.842405	7.76785		0.631804	7.15154		0.631804	7.16531		0.631804	7.0869		0.631804	7.0477		0.631804	7.14583		0.631804	7.05551		0.631804	7.06372		0.631804	7.13094		0.631804	7.04447		0.631804	7.06881		0.631804	7.04598		0.631804	7.05078		0.631804	7.12564		0.631804
	0.632884	7.13218		0.632884	7.16299		0.843845	7.80408		0.632884	7.15535		0.632884	7.16126		0.632884	7.0882		0.632884	7.04369		0.632884	7.13994		0.632884	7.04688		0.632884	7.0645		0.632884	7.12962		0.632884	7.04455		0.632884	7.06479		0.632884	7.05		0.632884	7.05602		0.632884	7.11308		0.632884
	0.633964	7.13452		0.633964	7.16248		0.845285	7.84181		0.633964	7.15801		0.633964	7.15663		0.633964	7.08887		0.633964	7.04232		0.633964	7.13381		0.633964	7.03815		0.633964	7.06556		0.633964	7.12833		0.633964	7.04422		0.633964	7.05993		0.633964	7.05367		0.633964	7.05915		0.633964	7.10146		0.633964
	0.635044	7.13757		0.635044	7.16197		0.846725	7.88154		0.635044	7.15892		0.635044	7.1514		0.635044	7.08917		0.635044	7.04383		0.635044	7.12809		0.635044	7.03009		0.635044	7.06678		0.635044	7.12686		0.635044	7.04346		0.635044	7.05443		0.635044	7.05633		0.635044	7.06016		0.635044	7.09122		0.635044
	0.636124	7.14103		0.636124	7.16168		0.848165	7.92391		0.636124	7.15787		0.636124	7.14562		0.636124	7.08946		0.636124	7.04825		0.636124	7.12315		0.636124	7.02342		0.636124	7.06796		0.636124	7.12479		0.636124	7.0421		0.636124	7.04865		0.636124	7.05767		0.636124	7.05919		0.636124	7.08281		0.636124
	0.637204	7.14432		0.637204	7.16187		0.849605	7.96963		0.637204	7.15495		0.637204	7.13938		0.637204	7.09012		0.637204	7.05522		0.637204	7.11911		0.637204	7.01866		0.637204	7.06899		0.637204	7.12169		0.637204	7.03991		0.637204	7.04303		0.637204	7.05779		0.637204	7.05645		0.637204	7.07668		0.637204
	0.638284	7.14678		0.638284	7.16274		0.851045	8.01927		0.638284	7.15063		0.638284	7.13302		0.638284	7.09161		0.638284	7.06391		0.638284	7.11569		0.638284	7.01607		0.638284	7.0698		0.638284	7.11729		0.638284	7.03682		0.638284	7.03794		0.638284	7.05711		0.638284	7.05221		0.638284	7.07318		0.638284
	0.639364	7.14771		0.639364	7.16415		0.852485	8.07331		0.639364	7.14589		0.639364	7.12723		0.639364	7.09436		0.639364	7.07329		0.639364	7.11232		0.639364	7.0157		0.639364	7.07025		0.639364	7.11157		0.639364	7.03316		0.639364	7.03352		0.639364	7.0561		0.639364	7.04693		0.639364	7.07233		0.639364
	0.640444	7.14652		0.640444	7.16578		0.853925	8.13221		0.640444	7.14202		0.640444	7.12275		0.640444	7.0986		0.640444	7.08254		0.640444	7.10825		0.640444	7.01749		0.640444	7.0701		0.640444	7.1046		0.640444	7.02954		0.640444	7.0298		0.640444	7.05501		0.640444	7.04124		0.640444	7.0738		0.640444
	0.641524	7.1428		0.641524	7.16734		0.855365	8.19644		0.641524	7.1403		0.641524	7.1201		0.641524	7.104		0.641524	7.09127		0.641524	7.10303		0.641524	7.02113		0.641524	7.06909		0.641524	7.09651		0.641524	7.02664		0.641524	7.0268		0.641524	7.05382		0.641524	7.03576		0.641524	7.07701		0.641524
	0.642604	7.13658		0.642604	7.16864		0.856805	8.26631		0.642604	7.14147		0.642604	7.11927		0.642604	7.10962		0.642604	7.09938		0.642604	7.09673		0.642604	7.02611		0.642604	7.06716		0.642604	7.0875		0.642604	7.02496		0.642604	7.02471		0.642604	7.05237		0.642604	7.03085		0.642604	7.08141		0.642604
	0.643684	7.12843		0.643684	7.16962		0.858245	8.3418		0.643684	7.14543		0.643684	7.11982		0.643684	7.11427		0.643684	7.10687		0.643684	7.08998		0.643684	7.0318		0.643684	7.06438		0.643684	7.07806		0.643684	7.02468		0.643684	7.02371		0.643684	7.05042		0.643684	7.02674		0.643684	7.08652		0.643684
	0.644764	7.11933		0.644764	7.17022		0.859686	8.42264		0.644764	7.15137		0.644764	7.12119		0.644764	7.117		0.644764	7.11361		0.644764	7.08364		0.644764	7.03764		0.644764	7.061		0.644764	7.06914		0.644764	7.02575		0.644764	7.02383		0.644764	7.04784		0.644764	7.02357		0.644764	7.09181		0.644764
	0.645844	7.11038		0.645844	7.17039		0.861126	8.5086		0.645844	7.1581		0.645844	7.123		0.645844	7.11731		0.645844	7.11942		0.645844	7.07836		0.645844	7.0433		0.645844	7.05729		0.645844	7.06198		0.645844	7.02796		0.645844	7.02473		0.645844	7.04456		0.645844	7.02152		0.645844	7.09664		0.645844
	0.646924	7.10257		0.646924	7.17022		0.862566	8.59978		0.646924	7.16435		0.646924	7.12495		0.646924	7.11529		0.646924	7.12425		0.646924	7.07447		0.646924	7.0488		0.646924	7.05356		0.646924	7.05768		0.646924	7.03081		0.646924	7.02575		0.646924	7.04071		0.646924	7.0208		0.646924	7.10018		0.646924
	0.648004	7.09671		0.648004	7.16991		0.864006	8.69644		0.648004	7.16892		0.648004	7.12679		0.648004	7.11138		0.648004	7.12799		0.648004	7.07206		0.648004	7.0545		0.648004	7.05019		0.648004	7.05691		0.648004	7.03376		0.648004	7.02625		0.648004	7.03669		0.648004	7.02151		0.648004	7.10175		0.648004
	0.649084	7.09349		0.649084	7.16964		0.865446	8.79887		0.649084	7.17087		0.649084	7.12831		0.649084	7.10639		0.649084	7.13053		0.649084	7.07108		0.649084	7.06109		0.649084	7.04756		0.649084	7.05985		0.649084	7.03627		0.649084	7.02586		0.649084	7.03305		0.649084	7.02355		0.649084	7.10099		0.649084
	0.650164	7.09335		0.650164	7.16947		0.866886	8.90747		0.650164	7.16979		0.650164	7.12965		0.650164	7.10131		0.650164	7.13164		0.650164	7.07136		0.650164	7.06927		0.650164	7.0459		0.650164	7.06629		0.650164	7.03803		0.650164	7.02457		0.650164	7.03036		0.650164	7.02665		0.650164	7.09788		0.650164
	0.651244	7.09613		0.651244	7.16936		0.868326	9.02283		0.651244	7.16602		0.651244	7.13131		0.651244	7.09726		0.651244	7.13118		0.651244	7.07259		0.651244	7.0795		0.651244	7.04512		0.651244	7.07574		0.651244	7.03904		0.651244	7.02251		0.651244	7.02896		0.651244	7.0304		0.651244	7.09269		0.651244
	0.652324	7.10102		0.652324	7.16923		0.869766	9.1458		0.652324	7.16057		0.652324	7.13401		0.652324	7.09506		0.652324	7.12917		0.652324	7.07429		0.652324	7.09171		0.652324	7.04489		0.652324	7.08728		0.652324	7.03942		0.652324	7.01984		0.652324	7.02889		0.652324	7.03418		0.652324	7.08582		0.652324
	0.653404	7.10672		0.653404	7.16905		0.871206	9.27717		0.653404	7.15473		0.653404	7.13821		0.653404	7.09503		0.653404	7.12573		0.653404	7.07606		0.653404	7.10521		0.653404	7.04472		0.653404	7.09963		0.653404	7.03929		0.653404	7.01694		0.653404	7.02997		0.653404	7.03723		0.653404	7.0778		0.653404
	0.654484	7.11193		0.654484	7.16871		0.872646	9.41741		0.654484	7.14956		0.654484	7.1439		0.654484	7.09692		0.654484	7.1211		0.654484	7.07781		0.654484	7.11887		0.654484	7.04408		0.654484	7.11134		0.654484	7.0388		0.654484	7.0146		0.654484	7.03197		0.654484	7.03883		0.654484	7.06944		0.654484
	0.655564	7.11572		0.655564	7.1681		0.874086	9.56648		0.655564	7.1457		0.655564	7.15069		0.655564	7.09993		0.655564	7.1156		0.655564	7.0797		0.655564	7.13134		0.655564	7.04261		0.655564	7.12128		0.655564	7.0381		0.655564	7.01383		0.655564	7.03468		0.655564	7.03827		0.655564	7.06186		0.655564
	0.656644	7.11761		0.656644	7.16716		0.875526	9.72409		0.656644	7.1433		0.656644	7.15795		0.656644	7.10295		0.656644	7.10977		0.656644	7.08188		0.656644	7.14119		0.656644	7.04013		0.656644	7.12895		0.656644	7.03731		0.656644	7.01538		0.656644	7.03784		0.656644	7.03518		0.656644	7.05628		0.656644
	0.657724	7.11757		0.657724	7.16585		0.876966	9.88973		0.657724	7.14216		0.657724	7.16497		0.657724	7.10502		0.657724	7.10423		0.657724	7.08422		0.657724	7.147		0.657724	7.03681		0.657724	7.1343		0.657724	7.03632		0.657724	7.01929		0.657724	7.04113		0.657724	7.02961		0.657724	7.05371		0.657724
	0.658804	7.11596		0.658804	7.16411		0.878406	10.0627		0.658804	7.14181		0.658804	7.17094		0.658804	7.10561		0.658804	7.09962		0.658804	7.08616		0.658804	7.14771		0.658804	7.03319		0.658804	7.13763		0.658804	7.03483		0.658804	7.02491		0.658804	7.0442		0.658804	7.02207		0.658804	7.05466		0.658804
	0.659884	7.11345		0.659884	7.16158		0.879846	10.2422		0.659884	7.14148		0.659884	7.17511		0.659884	7.10483		0.659884	7.09637		0.659884	7.08699		0.659884	7.1431		0.659884	7.03011		0.659884	7.13931		0.659884	7.03247		0.659884	7.03128		0.659884	7.04686		0.659884	7.01351		0.659884	7.05906		0.659884
	0.660964	7.11071		0.660964	7.15786		0.881286	10.4275		0.660964	7.14038		0.660964	7.17686		0.660964	7.10323		0.660964	7.09471		0.660964	7.08597		0.660964	7.13409		0.660964	7.02843		0.660964	7.13985		0.660964	7.02906		0.660964	7.03751		0.660964	7.04914		0.660964	7.00512		0.660964	7.06644		0.660964
	0.662044	7.10828		0.662044	7.15277		0.882726	10.6186		0.662044	7.13806		0.662044	7.17607		0.662044	7.10151		0.662044	7.09466		0.662044	7.08263		0.662044	7.1225		0.662044	7.02881		0.662044	7.13978		0.662044	7.02485		0.662044	7.04298		0.662044	7.05115		0.662044	6.99806		0.662044	7.07597		0.662044
	0.663124	7.10635		0.663124	7.14644		0.884166	10.816		0.663124	7.13466		0.663124	7.17289		0.663124	7.10031		0.663124	7.096		0.663124	7.07693		0.663124	7.11038		0.663124	7.03143		0.663124	7.13954		0.663124	7.02036		0.663124	7.04721		0.663124	7.0529		0.663124	6.99317		0.663124	7.08662		0.663124
	0.664204	7.10496		0.664204	7.1393		0.885606	11.0206		0.664204	7.1309		0.664204	7.16782		0.664204	7.10016		0.664204	7.09828		0.664204	7.06942		0.664204	7.09943		0.664204	7.03604		0.664204	7.13918		0.664204	7.01606		0.664204	7.04989		0.664204	7.05427		0.664204	6.99093		0.664204	7.09717		0.664204
	0.665284	7.10407		0.665284	7.13193		0.887046	11.2333		0.665284	7.12775		0.665284	7.16148		0.665284	7.10143		0.665284	7.10093		0.665284	7.06118		0.665284	7.09079		0.665284	7.04203		0.665284	7.13844		0.665284	7.01227		0.665284	7.05094		0.665284	7.0551		0.665284	6.99129		0.665284	7.10653		0.665284
	0.666364	7.10363		0.666364	7.12497		0.888486	11.4544		0.666364	7.12603		0.666364	7.15457		0.666364	7.10412		0.666364	7.10332		0.666364	7.05355		0.666364	7.08509		0.666364	7.04863		0.666364	7.13692		0.666364	7.00915		0.666364	7.05068		0.666364	7.05538		0.666364	6.99373		0.666364	7.11389		0.666364
	0.667444	7.10354		0.667444	7.11923		0.889926	11.6841		0.667444	7.12619		0.667444	7.14786		0.667444	7.10786		0.667444	7.10493		0.667444	7.04781		0.667444	7.08242		0.667444	7.05507		0.667444	7.13432		0.667444	7.00684		0.667444	7.04979		0.667444	7.05528		0.667444	6.99747		0.667444	7.11896		0.667444
	0.668524	7.10374		0.668524	7.11555		0.891366	11.9222		0.668524	7.12836		0.668524	7.14208		0.668524	7.11194		0.668524	7.10552		0.668524	7.04482		0.668524	7.08219		0.668524	7.06072		0.668524	7.13065		0.668524	7.00535		0.668524	7.04904		0.668524	7.05501		0.668524	7.00169		0.668524	7.12174		0.668524
	0.669604	7.10442		0.669604	7.11454		0.892806	12.168		0.669604	7.13237		0.669604	7.13775		0.669604	7.11563		0.669604	7.10508		0.669604	7.04502		0.669604	7.08331		0.669604	7.06525		0.669604	7.12608		0.669604	7.00459		0.669604	7.04896		0.669604	7.05464		0.669604	7.00576		0.669604	7.12247		0.669604
	0.670684	7.10599		0.670684	7.11636		0.894246	12.4204		0.670684	7.13769		0.670684	7.13518		0.670684	7.1184		0.670684	7.10385		0.670684	7.04835		0.670684	7.08444		0.670684	7.06865		0.670684	7.12085		0.670684	7.00432		0.670684	7.04978		0.670684	7.05419		0.670684	7.00919		0.670684	7.12162		0.670684
	0.671764	7.10883		0.671764	7.12064		0.895686	12.6783		0.671764	7.14345		0.671764	7.13448		0.671764	7.11989		0.671764	7.1022		0.671764	7.05418		0.671764	7.08463		0.671764	7.0713		0.671764	7.11532		0.671764	7.00432		0.671764	7.05159		0.671764	7.0537		0.671764	7.01168		0.671764	7.11974		0.671764
	0.672844	7.11291		0.672844	7.12676		0.897126	12.9411		0.672844	7.14874		0.672844	7.13564		0.672844	7.11989		0.672844	7.10034		0.672844	7.06137		0.672844	7.08356		0.672844	7.0738		0.672844	7.11001		0.672844	7.00451		0.672844	7.05472		0.672844	7.0533		0.672844	7.01321		0.672844	7.11736		0.672844
	0.673924	7.11761		0.673924	7.134		0.898566	13.2088		0.673924	7.15297		0.673924	7.13851		0.673924	7.11829		0.673924	7.09828		0.673924	7.06862		0.673924	7.08146		0.673924	7.07658		0.673924	7.10562		0.673924	7.00505		0.673924	7.05959		0.673924	7.05308		0.673924	7.01413		0.673924	7.11485		0.673924
	0.675004	7.122		0.675004	7.1418		0.900006	13.4822		0.675004	7.15609		0.675004	7.14278		0.675004	7.11518		0.675004	7.09586		0.675004	7.07489		0.675004	7.07891		0.675004	7.07979		0.675004	7.10283		0.675004	7.00623		0.675004	7.0664		0.675004	7.05293		0.675004	7.01498		0.675004	7.11235		0.675004
	0.676084	7.12517		0.676084	7.14963		0.901446	13.7627		0.676084	7.15848		0.676084	7.14793		0.676084	7.11084		0.676084	7.09296		0.676084	7.07987		0.676084	7.07663		0.676084	7.08322		0.676084	7.10198		0.676084	7.00852		0.676084	7.07483		0.676084	7.05255		0.676084	7.0163		0.676084	7.10992		0.676084
	0.677164	7.12645		0.677164	7.15695		0.902886	14.0518		0.677164	7.16069		0.677164	7.15339		0.677164	7.10566		0.677164	7.08964		0.677164	7.08383		0.677164	7.07525		0.677164	7.0865		0.677164	7.10283		0.677164	7.01247		0.677164	7.08414		0.677164	7.05155		0.677164	7.01835		0.677164	7.10753		0.677164
	0.678244	7.12535		0.678244	7.16341		0.904326	14.3512		0.678244	7.16312		0.678244	7.15856		0.678244	7.1		0.678244	7.08608		0.678244	7.08716		0.678244	7.07516		0.678244	7.08925		0.678244	7.10486		0.678244	7.0184		0.678244	7.09365		0.678244	7.04971		0.678244	7.02115		0.678244	7.10499		0.678244
	0.679324	7.12156		0.679324	7.16886		0.905766	14.662		0.679324	7.166		0.679324	7.16296		0.679324	7.09426		0.679324	7.08246		0.679324	7.09006		0.679324	7.07645		0.679324	7.09113		0.679324	7.10751		0.679324	7.02615		0.679324	7.10276		0.679324	7.04689		0.679324	7.0247		0.679324	7.10193		0.679324
	0.680404	7.11508		0.680404	7.17325		0.907206	14.9842		0.680404	7.16926		0.680404	7.16621		0.680404	7.08899		0.680404	7.07902		0.680404	7.09258		0.680404	7.07886		0.680404	7.09187		0.680404	7.11054		0.680404	7.03496		0.680404	7.11083		0.680404	7.04302		0.680404	7.02891		0.680404	7.09802		0.680404
	0.681484	7.10637		0.681484	7.17649		0.908646	15.3168		0.681484	7.17242		0.681484	7.16818		0.681484	7.0849		0.681484	7.07608		0.681484	7.09478		0.681484	7.08199		0.681484	7.09141		0.681484	7.1138		0.681484	7.04367		0.681484	7.11693		0.681484	7.03801		0.681484	7.03354		0.681484	7.09327		0.681484
	0.682564	7.09658		0.682564	7.17843		0.910086	15.6583		0.682564	7.17472		0.682564	7.16887		0.682564	7.08256		0.682564	7.07413		0.682564	7.09671		0.682564	7.08535		0.682564	7.09001		0.682564	7.11703		0.682564	7.05107		0.682564	7.12012		0.682564	7.03196		0.682564	7.03812		0.682564	7.08812		0.682564
	0.683644	7.0872		0.683644	7.1789		0.911526	16.0071		0.683644	7.17531		0.683644	7.16844		0.683644	7.08228		0.683644	7.07361		0.683644	7.09835		0.683644	7.08833		0.683644	7.08826		0.683644	7.11977		0.683644	7.05613		0.683644	7.11999		0.683644	7.02521		0.683644	7.04212		0.683644	7.08332		0.683644
	0.684724	7.07964		0.684724	7.17795		0.912966	16.3616		0.684724	7.17373		0.684724	7.16701		0.684724	7.08406		0.684724	7.07467		0.684724	7.09943		0.684724	7.09028		0.684724	7.08689		0.684724	7.12162		0.684724	7.05807		0.684724	7.11699		0.684724	7.01828		0.684724	7.04506		0.684724	7.0796		0.684724
	0.685804	7.07478		0.685804	7.17579		0.914406	16.7203		0.685804	7.17006		0.685804	7.16468		0.685804	7.08761		0.685804	7.07702		0.685804	7.09956		0.685804	7.09059		0.685804	7.08665		0.685804	7.12259		0.685804	7.05646		0.685804	7.11209		0.685804	7.01172		0.685804	7.04666		0.685804	7.07766		0.685804
	0.686884	7.07288		0.686884	7.17263		0.915846	17.082		0.686884	7.1649		0.686884	7.16163		0.686884	7.0925		0.686884	7.08008		0.686884	7.09854		0.686884	7.08885		0.686884	7.08792		0.686884	7.123		0.686884	7.05146		0.686884	7.10613		0.686884	7.00592		0.686884	7.04678		0.686884	7.07817		0.686884
	0.687964	7.07372		0.687964	7.16873		0.917286	17.4464		0.687964	7.15918		0.687964	7.1582		0.687964	7.09811		0.687964	7.08316		0.687964	7.09645		0.687964	7.08488		0.687964	7.0906		0.687964	7.1231		0.687964	7.04405		0.687964	7.09965		0.687964	7.00121		0.687964	7.04542		0.687964	7.0816		0.687964
	0.689044	7.07684		0.689044	7.16435		0.918726	17.8144		0.689044	7.15394		0.689044	7.15476		0.689044	7.10365		0.689044	7.08569		0.689044	7.09364		0.689044	7.0788		0.689044	7.09426		0.689044	7.12281		0.689044	7.0358		0.689044	7.09296		0.689044	6.99783		0.689044	7.04286		0.689044	7.08799		0.689044
	0.690124	7.08163		0.690124	7.15983		0.920166	18.188		0.690124	7.14999		0.690124	7.15166		0.690124	7.1083		0.690124	7.08724		0.690124	7.09041		0.690124	7.07092		0.690124	7.09823		0.690124	7.12183		0.690124	7.02839		0.690124	7.08644		0.690124	6.99597		0.690124	7.03967		0.690124	7.09669		0.690124
	0.691204	7.08727		0.691204	7.15535		0.921606	18.5692		0.691204	7.14785		0.691204	7.14907		0.691204	7.11142		0.691204	7.08756		0.691204	7.08692		0.691204	7.06189		0.691204	7.10189		0.691204	7.11998		0.691204	7.02299		0.691204	7.08054		0.691204	6.99569		0.691204	7.03656		0.691204	7.10647		0.691204
	0.692284	7.09282		0.692284	7.15081		0.923046	18.9596		0.692284	7.14763		0.692284	7.14705		0.692284	7.11278		0.692284	7.08663		0.692284	7.0832		0.692284	7.05268		0.692284	7.1047		0.692284	7.11735		0.692284	7.02		0.692284	7.0754		0.692284	6.99688		0.692284	7.03416		0.692284	7.11594		0.692284
	0.693364	7.09744		0.693364	7.14593		0.924486	19.36		0.693364	7.14904		0.693364	7.14568		0.693364	7.11238		0.693364	7.0847		0.693364	7.0793		0.693364	7.04453		0.693364	7.10604		0.693364	7.11417		0.693364	7.01913		0.693364	7.07078		0.693364	6.9993		0.693364	7.03281		0.693364	7.12401		0.693364
	0.694444	7.10064		0.694444	7.14058		0.925926	19.771		0.694444	7.15162		0.694444	7.14502		0.694444	7.11043		0.694444	7.08237		0.694444	7.07533		0.694444	7.03874		0.694444	7.10537		0.694444	7.11059		0.694444	7.01961		0.694444	7.06625		0.694444	7.00254		0.694444	7.03243		0.694444	7.1299		0.694444
	0.695524	7.10239		0.695524	7.13493		0.927366	20.1928		0.695524	7.15477		0.695524	7.14502		0.695524	7.10733		0.695524	7.08035		0.695524	7.07146		0.695524	7.03638		0.695524	7.10248		0.695524	7.10661		0.695524	7.02047		0.695524	7.06167		0.695524	7.00615		0.695524	7.03276		0.695524	7.13326		0.695524
	0.696604	7.10294		0.696604	7.12937		0.928806	20.6252		0.696604	7.15807		0.696604	7.14545		0.696604	7.10359		0.696604	7.07922		0.696604	7.06771		0.696604	7.038		0.696604	7.09773		0.696604	7.1024		0.696604	7.02066		0.696604	7.05737		0.696604	7.00964		0.696604	7.0334		0.696604	7.13419		0.696604
	0.697684	7.10269		0.697684	7.12431		0.930246	21.0672		0.697684	7.16125		0.697684	7.14599		0.697684	7.09987		0.697684	7.07936		0.697684	7.06389		0.697684	7.04346		0.697684	7.09186		0.697684	7.09842		0.697684	7.01949		0.697684	7.05405		0.697684	7.01269		0.697684	7.03375		0.697684	7.1333		0.697684
	0.698764	7.10202		0.698764	7.12009		0.931686	21.5175		0.698764	7.16432		0.698764	7.1463		0.698764	7.0967		0.698764	7.08087		0.698764	7.05982		0.698764	7.05197		0.698764	7.08569		0.698764	7.0955		0.698764	7.01683		0.698764	7.05227		0.698764	7.01529		0.698764	7.03321		0.698764	7.13161		0.698764
	0.699844	7.10124		0.699844	7.11703		0.933126	21.9753		0.699844	7.1674		0.699844	7.14632		0.699844	7.09445		0.699844	7.0837		0.699844	7.0554		0.699844	7.06222		0.699844	7.07974		0.699844	7.0946		0.699844	7.01327		0.699844	7.0522		0.699844	7.01766		0.699844	7.03128		0.699844	7.13019		0.699844
	0.700924	7.1006		0.700924	7.11554		0.934566	22.441		0.700924	7.1705		0.700924	7.14641		0.700924	7.09323		0.700924	7.08753		0.700924	7.05079		0.700924	7.07268		0.700924	7.07416		0.700924	7.09639		0.700924	7.00994		0.700924	7.05368		0.700924	7.02012		0.700924	7.0278		0.700924	7.12979		0.700924
	0.702004	7.10028		0.702004	7.11582		0.936006	22.9161		0.702004	7.17353		0.702004	7.14726		0.702004	7.09299		0.702004	7.09176		0.702004	7.04627		0.702004	7.08201		0.702004	7.06887		0.702004	7.10105		0.702004	7.00814		0.702004	7.05643		0.702004	7.02292		0.702004	7.02311		0.702004	7.1306		0.702004
	0.703084	7.1003		0.703084	7.1177		0.937446	23.4031		0.703084	7.17635		0.703084	7.14971		0.703084	7.09361		0.703084	7.09549		0.703084	7.04202		0.703084	7.08925		0.703084	7.06366		0.703084	7.10827		0.703084	7.00886		0.703084	7.06014		0.703084	7.02618		0.703084	7.01788		0.703084	7.13231		0.703084
	0.704165	7.10043		0.704165	7.12054		0.938886	23.9047		0.704165	7.17884		0.704165	7.15429		0.704165	7.09492		0.704165	7.09789		0.704165	7.03818		0.704165	7.09387		0.704165	7.05833		0.704165	7.1173		0.704165	7.01255		0.704165	7.06438		0.704165	7.02996		0.704165	7.0128		0.704165	7.13432		0.704165
	0.705245	7.10024		0.705245	7.12344		0.940326	24.424		0.705245	7.181		0.705245	7.16111		0.705245	7.09668		0.705245	7.09858		0.705245	7.03502		0.705245	7.09575		0.705245	7.05271		0.705245	7.12728		0.705245	7.01896		0.705245	7.06848		0.705245	7.03419		0.705245	7.00845		0.705245	7.13587		0.705245
	0.706325	7.09917		0.706325	7.1256		0.941766	24.9633		0.706325	7.18282		0.706325	7.16981		0.706325	7.09864		0.706325	7.0977		0.706325	7.03297		0.706325	7.09512		0.706325	7.0468		0.706325	7.1373		0.706325	7.02723		0.706325	7.07158		0.706325	7.03866		0.706325	7.00521		0.706325	7.13625		0.706325
	0.707405	7.09679		0.707405	7.12659		0.943206	25.5245		0.707405	7.18444		0.707405	7.1797		0.707405	7.10061		0.707405	7.09577		0.707405	7.03249		0.707405	7.09243		0.707405	7.04086		0.707405	7.14636		0.707405	7.03611		0.707405	7.07308		0.707405	7.0429		0.707405	7.00338		0.707405	7.13494		0.707405
	0.708485	7.09297		0.708485	7.12639		0.944646	26.1082		0.708485	7.18608		0.708485	7.18968		0.708485	7.10244		0.708485	7.09344		0.708485	7.03381		0.708485	7.08834		0.708485	7.03549		0.708485	7.15359		0.708485	7.04424		0.708485	7.07284		0.708485	7.0464		0.708485	7.00322		0.708485	7.13187		0.708485
	0.709565	7.08788		0.709565	7.12525		0.946086	26.7146		0.709565	7.18805		0.709565	7.19827		0.709565	7.10398		0.709565	7.09126		0.709565	7.03679		0.709565	7.08357		0.709565	7.03161		0.709565	7.15848		0.709565	7.05041		0.709565	7.07117		0.709565	7.04873		0.709565	7.00491		0.709565	7.12741		0.709565
	0.710645	7.08204		0.710645	7.12357		0.947526	27.3434		0.710645	7.19054		0.710645	7.20398		0.710645	7.10517		0.710645	7.08979		0.710645	7.04098		0.710645	7.07872		0.710645	7.03018		0.710645	7.16105		0.710645	7.05383		0.710645	7.06848		0.710645	7.04985		0.710645	7.00844		0.710645	7.12227		0.710645
	0.711725	7.07622		0.711725	7.12181		0.948966	27.9941		0.711725	7.19346		0.711725	7.20573		0.711725	7.10599		0.711725	7.08954		0.711725	7.04586		0.711725	7.07413		0.711725	7.03189		0.711725	7.16179		0.711725	7.05436		0.711725	7.06504		0.711725	7.0501		0.711725	7.01355		0.711725	7.11718		0.711725
	0.712805	7.07135		0.712805	7.12046		0.950406	28.6664		0.712805	7.19636		0.712805	7.20323		0.712805	7.10666		0.712805	7.09092		0.712805	7.05093		0.712805	7.06987		0.712805	7.03677		0.712805	7.16143		0.712805	7.05256		0.712805	7.06087		0.712805	7.05009		0.712805	7.01979		0.712805	7.11281		0.712805
	0.713885	7.06835		0.713885	7.1201		0.951846	29.3612		0.713885	7.19866		0.713885	7.19709		0.713885	7.1075		0.713885	7.09396		0.713885	7.05581		0.713885	7.06595		0.713885	7.0442		0.713885	7.1605		0.713885	7.04944		0.713885	7.05607		0.713885	7.05043		0.713885	7.02654		0.713885	7.10968		0.713885
	0.714965	7.06782		0.714965	7.12115		0.953286	30.0812		0.714965	7.19981		0.714965	7.18847		0.714965	7.10877		0.714965	7.09814		0.714965	7.06026		0.714965	7.06241		0.714965	7.0531		0.714965	7.15917		0.714965	7.04612		0.714965	7.0509		0.714965	7.05169		0.714965	7.03315		0.714965	7.10804		0.714965
	0.716045	7.0699		0.716045	7.12357		0.954726	30.8298		0.716045	7.19944		0.716045	7.17889		0.716045	7.11056		0.716045	7.10263		0.716045	7.0641		0.716045	7.05934		0.716045	7.06232		0.716045	7.15721		0.716045	7.04338		0.716045	7.04566		0.716045	7.05424		0.716045	7.03893		0.716045	7.10787		0.716045
	0.717125	7.07424		0.717125	7.12681		0.956166	31.6104		0.717125	7.19739		0.717125	7.16994		0.717125	7.11284		0.717125	7.10678		0.717125	7.06722		0.717125	7.05669		0.717125	7.07063		0.717125	7.1543		0.717125	7.04162		0.717125	7.04064		0.717125	7.05826		0.717125	7.04328		0.717125	7.10881		0.717125
	0.718205	7.08018		0.718205	7.12998		0.957606	32.4254		0.718205	7.1938		0.718205	7.1631		0.718205	7.11554		0.718205	7.11039		0.718205	7.06974		0.718205	7.0541		0.718205	7.07685		0.718205	7.15013		0.718205	7.04088		0.718205	7.03602		0.718205	7.06363		0.718205	7.04566		0.718205	7.11029		0.718205
	0.719285	7.08678		0.719285	7.1323		0.959046	33.2755		0.719285	7.18908		0.719285	7.15937		0.719285	7.1185		0.719285	7.11366		0.719285	7.07198		0.719285	7.0511		0.719285	7.08002		0.719285	7.14464		0.719285	7.04088		0.719285	7.0321		0.719285	7.06988		0.719285	7.04572		0.719285	7.11178		0.719285
	0.720365	7.09297		0.720365	7.13336		0.960486	34.1595		0.720365	7.1839		0.720365	7.15914		0.720365	7.12146		0.720365	7.11679		0.720365	7.07436		0.720365	7.04742		0.720365	7.07963		0.720365	7.138		0.720365	7.04106		0.720365	7.02944		0.720365	7.07615		0.720365	7.04337		0.720365	7.11299		0.720365
	0.721445	7.09776		0.721445	7.13307		0.961926	35.0747		0.721445	7.17901		0.721445	7.16206		0.721445	7.12394		0.721445	7.11973		0.721445	7.07712		0.721445	7.04322		0.721445	7.07585		0.721445	7.13053		0.721445	7.04063		0.721445	7.0287		0.721445	7.08138		0.721445	7.03902		0.721445	7.11385		0.721445
	0.722525	7.10055		0.722525	7.13158		0.963366	36.0166		0.722525	7.17504		0.722525	7.1674		0.722525	7.12541		0.722525	7.12221		0.722525	7.07999		0.722525	7.03897		0.722525	7.06943		0.722525	7.12267		0.722525	7.03893		0.722525	7.03016		0.722525	7.08455		0.722525	7.03349		0.722525	7.11456		0.722525
	0.723605	7.10132		0.723605	7.12929		0.964806	36.9802		0.723605	7.17229		0.723605	7.17415		0.723605	7.12559		0.723605	7.12406		0.723605	7.08239		0.723605	7.03509		0.723605	7.06132		0.723605	7.11493		0.723605	7.0358		0.723605	7.03342		0.723605	7.08495		0.723605	7.02792		0.723605	7.11554		0.723605
	0.724685	7.10045		0.724685	7.12699		0.966246	37.9599		0.724685	7.17058		0.724685	7.18131		0.724685	7.12441		0.724685	7.12528		0.724685	7.08367		0.724685	7.03182		0.724685	7.05262		0.724685	7.10798		0.724685	7.03173		0.724685	7.03745		0.724685	7.08243		0.724685	7.02338		0.724685	7.11731		0.724685
	0.725765	7.09851		0.725765	7.12574		0.967686	38.9502		0.725765	7.16934		0.725765	7.18795		0.725765	7.12201		0.725765	7.12581		0.725765	7.08342		0.725765	7.02937		0.725765	7.04443		0.725765	7.10255		0.725765	7.02757		0.725765	7.04114		0.725765	7.0775		0.725765	7.02051		0.725765	7.12031		0.725765
	0.726845	7.0961		0.726845	7.12653		0.969126	39.9457		0.726845	7.16793		0.726845	7.19342		0.726845	7.11866		0.726845	7.12546		0.726845	7.08145		0.726845	7.02816		0.726845	7.03785		0.726845	7.09929		0.726845	7.02401		0.726845	7.04368		0.726845	7.07121		0.726845	7.01957		0.726845	7.12469		0.726845
	0.727925	7.09398		0.727925	7.12979		0.970566	40.9416		0.727925	7.16586		0.727925	7.19736		0.727925	7.11465		0.727925	7.12404		0.727925	7.07772		0.727925	7.02869		0.727925	7.03374		0.727925	7.0984		0.727925	7.02152		0.727925	7.04469		0.727925	7.0649		0.727925	7.0206		0.727925	7.13024		0.727925
	0.729005	7.09291		0.729005	7.13527		0.972006	41.9332		0.729005	7.16291		0.729005	7.19977		0.729005	7.11038		0.729005	7.12171		0.729005	7.07236		0.729005	7.03127		0.729005	7.03261		0.729005	7.09959		0.729005	7.02046		0.729005	7.04404		0.729005	7.0598		0.729005	7.02345		0.729005	7.13657		0.729005
	0.730085	7.09356		0.730085	7.14215		0.973446	42.9154		0.730085	7.1592		0.730085	7.20085		0.730085	7.1064		0.730085	7.1192		0.730085	7.06592		0.730085	7.03579		0.730085	7.03459		0.730085	7.10238		0.730085	7.02112		0.730085	7.0418		0.730085	7.05676		0.730085	7.02776		0.730085	7.14322		0.730085
	0.731165	7.09633		0.731165	7.14931		0.974886	43.883		0.731165	7.15511		0.731165	7.20093		0.731165	7.10326		0.731165	7.11758		0.731165	7.05932		0.731165	7.04172		0.731165	7.03943		0.731165	7.10635		0.731165	7.02357		0.731165	7.03835		0.731165	7.05607		0.731165	7.03286		0.731165	7.14964		0.731165
	0.732245	7.10127		0.732245	7.15556		0.976326	44.8297		0.732245	7.15127		0.732245	7.20032		0.732245	7.10152		0.732245	7.11782		0.732245	7.05377		0.732245	7.04849		0.732245	7.0467		0.732245	7.11124		0.732245	7.02739		0.732245	7.03455		0.732245	7.05746		0.732245	7.03787		0.732245	7.15525		0.732245
	0.733325	7.10821		0.733325	7.15986		0.977766	45.7499		0.733325	7.14855		0.733325	7.19922		0.733325	7.10166		0.733325	7.12034		0.733325	7.05022		0.733325	7.05563		0.733325	7.05571		0.733325	7.11669		0.733325	7.03174		0.733325	7.03149		0.733325	7.06016		0.733325	7.04219		0.733325	7.15947		0.733325
	0.734405	7.11682		0.734405	7.16158		0.979206	46.6386		0.734405	7.14781		0.734405	7.19762		0.734405	7.10403		0.734405	7.12498		0.734405	7.04913		0.734405	7.06278		0.734405	7.06562		0.734405	7.12206		0.734405	7.03588		0.734405	7.02994		0.734405	7.06292		0.734405	7.04576		0.734405	7.162		0.734405
	0.735485	7.1266		0.735485	7.16065		0.980646	47.4917		0.735485	7.14966		0.735485	7.19541		0.735485	7.10881		0.735485	7.13113		0.735485	7.05048		0.735485	7.06947		0.735485	7.0755		0.735485	7.12647		0.735485	7.03942		0.735485	7.03008		0.735485	7.06435		0.735485	7.04906		0.735485	7.16291		0.735485
	0.736565	7.13687		0.736565	7.1576		0.982086	48.3049		0.736565	7.15414		0.736565	7.19247		0.736565	7.11592		0.736565	7.13785		0.736565	7.05396		0.736565	7.0752		0.736565	7.08438		0.736565	7.12929		0.736565	7.04228		0.736565	7.03159		0.736565	7.06339		0.736565	7.05272		0.736565	7.16241		0.736565
	0.737645	7.14693		0.737645	7.15331		0.983526	49.0742		0.737645	7.16091		0.737645	7.18877		0.737645	7.12493		0.737645	7.14393		0.737645	7.05907		0.737645	7.07945		0.737645	7.09141		0.737645	7.13047		0.737645	7.04427		0.737645	7.034		0.737645	7.05977		0.737645	7.05717		0.737645	7.16054		0.737645
	0.738725	7.15609		0.738725	7.14873		0.984966	49.7969		0.738725	7.16921		0.738725	7.18427		0.738725	7.13512		0.738725	7.14816		0.738725	7.06521		0.738725	7.08208		0.738725	7.09606		0.738725	7.13042		0.738725	7.04511		0.738725	7.03709		0.738725	7.05407		0.738725	7.06254		0.738725	7.15717		0.738725
	0.739805	7.16388		0.739805	7.1447		0.986406	50.4712		0.739805	7.17815		0.739805	7.17892		0.739805	7.1457		0.739805	7.14963		0.739805	7.07172		0.739805	7.08345		0.739805	7.09809		0.739805	7.12965		0.739805	7.04464		0.739805	7.04083		0.739805	7.04746		0.739805	7.06868		0.739805	7.15225		0.739805
	0.740885	7.16996		0.740885	7.14187		0.987846	51.0963		0.740885	7.18682		0.740885	7.17265		0.740885	7.15587		0.740885	7.14814		0.740885	7.07806		0.740885	7.08432		0.740885	7.09758		0.740885	7.12839		0.740885	7.04313		0.740885	7.04516		0.740885	7.0412		0.740885	7.07529		0.740885	7.14601		0.740885
	0.741965	7.17418		0.741965	7.14061		0.989286	51.6708		0.741965	7.19456		0.741965	7.16554		0.741965	7.16495		0.741965	7.14428		0.741965	7.08396		0.741965	7.08568		0.741965	7.09483		0.741965	7.12671		0.741965	7.04117		0.741965	7.05003		0.741965	7.0363		0.741965	7.08178		0.741965	7.139		0.741965
	0.743045	7.17669		0.743045	7.14096		0.990726	52.1936		0.743045	7.201		0.743045	7.15807		0.743045	7.17244		0.743045	7.13906		0.743045	7.08935		0.743045	7.08842		0.743045	7.09028		0.743045	7.12475		0.743045	7.03931		0.743045	7.05535		0.743045	7.03351		0.743045	7.08731		0.743045	7.13167		0.743045
	0.744125	7.1778		0.744125	7.14267		0.992166	52.6647		0.744125	7.20612		0.744125	7.15095		0.744125	7.17803		0.744125	7.13354		0.744125	7.09442		0.744125	7.09312		0.744125	7.08461		0.744125	7.1229		0.744125	7.03789		0.744125	7.06105		0.744125	7.03319		0.744125	7.09103		0.744125	7.12429		0.744125
	0.745205	7.17795		0.745205	7.14542		0.993606	53.0853		0.745205	7.21008		0.745205	7.14495		0.745205	7.18176		0.745205	7.12867		0.745205	7.09943		0.745205	7.09995		0.745205	7.07876		0.745205	7.12156		0.745205	7.03726		0.745205	7.06697		0.745205	7.03518		0.745205	7.09235		0.745205	7.11714		0.745205
	0.746285	7.17756		0.746285	7.14893		0.995046	53.4573		0.746285	7.21309		0.746285	7.14068		0.746285	7.18396		0.746285	7.12522		0.746285	7.10474		0.746285	7.10865		0.746285	7.07366		0.746285	7.12092		0.746285	7.03792		0.746285	7.07279		0.746285	7.03886		0.746285	7.09145		0.746285	7.11069		0.746285
	0.747365	7.17694		0.747365	7.15304		0.996486	53.7819		0.747365	7.21537		0.747365	7.13855		0.747365	7.1852		0.747365	7.12376		0.747365	7.1107		0.747365	7.11859		0.747365	7.06999		0.747365	7.12084		0.747365	7.0402		0.747365	7.07807		0.747365	7.04334		0.747365	7.08919		0.747365	7.10548		0.747365
	0.748445	7.17627		0.748445	7.15755		0.997926	54.0607		0.748445	7.21725		0.748445	7.1389		0.748445	7.18613		0.748445	7.12435		0.748445	7.11753		0.748445	7.12882		0.748445	7.06793		0.748445	7.12113		0.748445	7.04397		0.748445	7.08239		0.748445	7.04796		0.748445	7.08675		0.748445	7.10186		0.748445
	0.749525	7.1756		0.749525	7.16211		0.999366	54.2955		0.749525	7.21899		0.749525	7.142		0.749525	7.18725		0.749525	7.12656		0.749525	7.12529		0.749525	7.13813		0.749525	7.0673		0.749525	7.12178		0.749525	7.04849		0.749525	7.08555		0.749525	7.05249		0.749525	7.08525		0.749525	7.09972		0.749525
	0.750605	7.17484		0.750605	7.16627		1.00081	54.4895		0.750605	7.22073		0.750605	7.14781		0.750605	7.1888		0.750605	7.1296		0.750605	7.13394		0.750605	7.14542		0.750605	7.06769		0.750605	7.12298		0.750605	7.05281		0.750605	7.08762		0.750605	7.05699		0.750605	7.08542		0.750605	7.09869		0.750605
	0.751685	7.17388		0.751685	7.16962		1.00225	54.6457		0.751685	7.22236		0.751685	7.15573		0.751685	7.19083		0.751685	7.13298		0.751685	7.14328		0.751685	7.15001		0.751685	7.06871		0.751685	7.12482		0.751685	7.05627		0.751685	7.08896		0.751685	7.06177		0.751685	7.08759		0.751685	7.0985		0.751685
	0.752765	7.17258		0.752765	7.17187		1.00369	54.767		0.752765	7.22368		0.752765	7.16465		0.752765	7.19329		0.752765	7.13656		0.752765	7.15288		0.752765	7.15209		0.752765	7.06993		0.752765	7.12712		0.752765	7.05854		0.752765	7.09008		0.752765	7.06731		0.752765	7.09173		0.752765	7.09909		0.752765
	0.753845	7.1709		0.753845	7.17287		1.00513	54.8562		0.753845	7.22461		0.753845	7.17328		0.753845	7.19607		0.753845	7.14045		0.753845	7.16205		0.753845	7.15243		0.753845	7.07097		0.753845	7.12946		0.753845	7.05947		0.753845	7.09139		0.753845	7.07416		0.753845	7.09724		0.753845	7.10044		0.753845
	0.754925	7.16896		0.754925	7.17256		1.00657	54.9166		0.754925	7.22522		0.754925	7.18059		0.754925	7.19891		0.754925	7.14459		0.754925	7.16996		0.754925	7.15194		0.754925	7.07164		0.754925	7.13145		0.754925	7.05901		0.754925	7.09295		0.754925	7.0827		0.754925	7.10311		0.754925	7.10253		0.754925
	0.756005	7.16716		0.756005	7.17096		1.00801	54.9517		0.756005	7.22561		0.756005	7.18582		0.756005	7.20139		0.756005	7.14868		0.756005	7.17598		0.756005	7.1512		0.756005	7.07219		0.756005	7.133		0.756005	7.0575		0.756005	7.09447		0.756005	7.09282		0.756005	7.10823		0.756005	7.10531		0.756005
	0.757085	7.16609		0.757085	7.16831		1.00945	54.9641		0.757085	7.2258		0.757085	7.18841		0.757085	7.20294		0.757085	7.15249		0.757085	7.17985		0.757085	7.15039		0.757085	7.07328		0.757085	7.13416		0.757085	7.05574		0.757085	7.09558		0.757085	7.1039		0.757085	7.11184		0.757085	7.10895		0.757085
	0.758165	7.16642		0.758165	7.16515		1.01089	54.9541		0.758165	7.2257		0.758165	7.18806		0.758165	7.20313		0.758165	7.15604		0.758165	7.18192		0.758165	7.14962		0.758165	7.07568		0.758165	7.1351		0.758165	7.05476		0.758165	7.09601		0.758165	7.11498		0.758165	7.1138		0.758165	7.1137		0.758165
	0.759245	7.16853		0.759245	7.1622		1.01233	54.9199		0.759245	7.22539		0.759245	7.18487		0.759245	7.20187		0.759245	7.15962		0.759245	7.18335		0.759245	7.14896		0.759245	7.0799		0.759245	7.13602		0.759245	7.05525		0.759245	7.09559		0.759245	7.12523		0.759245	7.11436		0.759245	7.11967		0.759245
	0.760325	7.17233		0.760325	7.16017		1.01377	54.8582		0.760325	7.22522		0.760325	7.17956		0.760325	7.19946		0.760325	7.16345		0.760325	7.18614		0.760325	7.14843		0.760325	7.08607		0.760325	7.13723		0.760325	7.05714		0.760325	7.09415		0.760325	7.13392		0.760325	7.11383		0.760325	7.12664		0.760325
	0.761405	7.17732		0.761405	7.15951		1.01521	54.7651		0.761405	7.22575		0.761405	7.17336		0.761405	7.19638		0.761405	7.1676		0.761405	7.19265		0.761405	7.14786		0.761405	7.09397		0.761405	7.13926		0.761405	7.05995		0.761405	7.09165		0.761405	7.14042		0.761405	7.11241		0.761405	7.13425		0.761405
	0.762485	7.18275		0.762485	7.16045		1.01665	54.6366		0.762485	7.22747		0.762485	7.16766		0.762485	7.19309		0.762485	7.1721		0.762485	7.20481		0.762485	7.14716		0.762485	7.10323		0.762485	7.14251		0.762485	7.06312		0.762485	7.0884		0.762485	7.1443		0.762485	7.1104		0.762485	7.1422		0.762485
	0.763565	7.18792		0.763565	7.16302		1.01809	54.4691		0.763565	7.23067		0.763565	7.16359		0.763565	7.18998		0.763565	7.1771		0.763565	7.22324		0.763565	7.1466		0.763565	7.1134		0.763565	7.14722		0.763565	7.0663		0.763565	7.08519		0.763565	7.14547		0.763565	7.10822		0.763565	7.15023		0.763565
	0.764645	7.19228		0.764645	7.16713		1.01953	54.2607		0.764645	7.23529		0.764645	7.16193		0.764645	7.18746		0.764645	7.18282		0.764645	7.2471		0.764645	7.14687		0.764645	7.12385		0.764645	7.15335		0.764645	7.06916		0.764645	7.08303		0.764645	7.14424		0.764645	7.10631		0.764645	7.15798		0.764645
	0.765725	7.19544		0.765725	7.17244		1.02097	54.0123		0.765725	7.24106		0.765725	7.16308		0.765725	7.186		0.765725	7.18937		0.765725	7.27446		0.765725	7.14868		0.765725	7.13379		0.765725	7.16081		0.765725	7.07129		0.765725	7.08269		0.765725	7.1412		0.765725	7.10489		0.765725	7.16483		0.765725
	0.766805	7.19724		0.766805	7.17842		1.02241	53.7271		0.766805	7.24765		0.766805	7.16704		0.766805	7.18609		0.766805	7.19665		0.766805	7.30268		0.766805	7.15238		0.766805	7.1424		0.766805	7.1693		0.766805	7.07222		0.766805	7.08445		0.766805	7.13705		0.766805	7.10402		0.766805	7.17005		0.766805
	0.767885	7.19791		0.767885	7.18441		1.02385	53.4107		0.767885	7.2546		0.767885	7.17333		0.767885	7.18791		0.767885	7.20438		0.767885	7.3286		0.767885	7.15778		0.767885	7.14918		0.767885	7.17826		0.767885	7.07177		0.767885	7.0883		0.767885	7.13241		0.767885	7.10391		0.767885	7.1731		0.767885
	0.768965	7.19815		0.768965	7.18964		1.02529	53.0695		0.768965	7.26152		0.768965	7.18104		0.768965	7.19122		0.768965	7.21223		0.768965	7.34884		0.768965	7.16426		0.768965	7.15393		0.768965	7.18685		0.768965	7.07015		0.768965	7.09422		0.768965	7.12787		0.768965	7.1051		0.768965	7.17384		0.768965
	0.770045	7.19904		0.770045	7.19346		1.02673	52.7109		0.770045	7.26801		0.770045	7.18899		0.770045	7.19563		0.770045	7.21994		0.770045	7.36057		0.770045	7.17097		0.770045	7.15665		0.770045	7.19423		0.770045	7.06783		0.770045	7.10199		0.770045	7.12395		0.770045	7.10821		0.770045	7.17248		0.770045
	0.771125	7.20149		0.771125	7.19541		1.02817	52.3413		0.771125	7.27377		0.771125	7.19625		0.771125	7.20094		0.771125	7.2274		0.771125	7.36269		0.771125	7.17699		0.771125	7.15741		0.771125	7.19993		0.771125	7.0653		0.771125	7.11106		0.771125	7.12104		0.771125	7.1136		0.771125	7.1695		0.771125
	0.772205	7.20583		0.772205	7.1954		1.02961	51.9655		0.772205	7.27879		0.772205	7.20236		0.772205	7.20729		0.772205	7.23466		0.772205	7.35626		0.772205	7.18153		0.772205	7.15635		0.772205	7.20391		0.772205	7.06283		0.772205	7.12033		0.772205	7.11944		0.772205	7.12115		0.772205	7.16562		0.772205
	0.773285	7.21174		0.773285	7.19366		1.03105	51.5857		0.773285	7.28329		0.773285	7.20743		0.773285	7.21497		0.773285	7.24184		0.773285	7.34389		0.773285	7.18407		0.773285	7.15396		0.773285	7.20649		0.773285	7.06053		0.773285	7.12854		0.773285	7.11946		0.773285	7.1303		0.773285	7.16188		0.773285
	0.774365	7.21853		0.774365	7.19067		1.03249	51.202		0.774365	7.28757		0.774365	7.21213		0.774365	7.22407		0.774365	7.24894		0.774365	7.32868		0.774365	7.18453		0.774365	7.15107		0.774365	7.20812		0.774365	7.05853		0.774365	7.13476		0.774365	7.12134		0.774365	7.14034		0.774365	7.15958		0.774365
	0.775445	7.22545		0.775445	7.1869		1.03393	50.8133		0.775445	7.29177		0.775445	7.21742		0.775445	7.23438		0.775445	7.25579		0.775445	7.3132		0.775445	7.18334		0.775445	7.1488		0.775445	7.2094		0.775445	7.05703		0.775445	7.13859		0.775445	7.12517		0.775445	7.15051		0.775445	7.15977		0.775445
	0.776525	7.23191		0.776525	7.18278		1.03537	50.4178		0.776525	7.29566		0.776525	7.22427		0.776525	7.24561		0.776525	7.26218		0.776525	7.29931		0.776525	7.18129		0.776525	7.14811		0.776525	7.21106		0.776525	7.05637		0.776525	7.14005		0.776525	7.13072		0.776525	7.16015		0.776525	7.16303		0.776525
	0.777605	7.23737		0.777605	7.17868		1.03681	50.0137		0.777605	7.29876		0.777605	7.23342		0.777605	7.25746		0.777605	7.26799		0.777605	7.28826		0.777605	7.17941		0.777605	7.14965		0.777605	7.21374		0.777605	7.05691		0.777605	7.13946		0.777605	7.1376		0.777605	7.16871		0.777605	7.16919		0.777605
	0.778685	7.24143		0.778685	7.17483		1.03825	49.6002		0.778685	7.30072		0.778685	7.24508		0.778685	7.26956		0.778685	7.27326		0.778685	7.28054		0.778685	7.17886		0.778685	7.15374		0.778685	7.21779		0.778685	7.05889		0.778685	7.13735		0.778685	7.14552		0.778685	7.17592		0.778685	7.17763		0.778685
	0.779765	7.24409		0.779765	7.17127		1.03969	49.1779		0.779765	7.30147		0.779765	7.25881		0.779765	7.28128		0.779765	7.27819		0.779765	7.27581		0.779765	7.1806		0.779765	7.16037		0.779765	7.22305		0.779765	7.06245		0.779765	7.13464		0.779765	7.15442		0.779765	7.18185		0.779765	7.18752		0.779765
	0.780845	7.24598		0.780845	7.16779		1.04113	48.7498		0.780845	7.30118		0.780845	7.27362		0.780845	7.2917		0.780845	7.28306		0.780845	7.27302		0.780845	7.1853		0.780845	7.16912		0.780845	7.22887		0.780845	7.06772		0.780845	7.13244		0.780845	7.16434		0.780845	7.18698		0.780845	7.19802		0.780845
	0.781925	7.24818		0.781925	7.16423		1.04257	48.3197		0.781925	7.3002		0.781925	7.28809		0.781925	7.3		0.781925	7.28825		0.781925	7.27087		0.781925	7.1932		0.781925	7.17917		0.781925	7.2343		0.781925	7.07485		0.781925	7.13168		0.781925	7.17516		0.781925	7.192		0.781925	7.20823		0.781925
	0.783005	7.25187		0.783005	7.16059		1.04401	47.8912		0.783005	7.29917		0.783005	7.30072		0.783005	7.30586		0.783005	7.29426		0.783005	7.26852		0.783005	7.20425		0.783005	7.18941		0.783005	7.23839		0.783005	7.08395		0.783005	7.13279		0.783005	7.18653		0.783005	7.19761		0.783005	7.21732		0.783005
	0.784085	7.25784		0.784085	7.15702		1.04545	47.4659		0.784085	7.29902		0.784085	7.31029		0.784085	7.30955		0.784085	7.30167		0.784085	7.26601		0.784085	7.21825		0.784085	7.19873		0.784085	7.24041		0.784085	7.09492		0.784085	7.13566		0.784085	7.19804		0.784085	7.20423		0.784085	7.22473		0.784085
	0.785165	7.26633		0.785165	7.15365		1.04689	47.0435		0.785165	7.30096		0.785165	7.31619		0.785165	7.31179		0.785165	7.31084		0.785165	7.26419		0.785165	7.23487		0.785165	7.20632		0.785165	7.24007		0.785165	7.10732		0.785165	7.13981		0.785165	7.20935		0.785165	7.21199		0.785165	7.23039		0.785165
	0.786245	7.27711		0.786245	7.15054		1.04833	46.6234		0.786245	7.3059		0.786245	7.31852		0.786245	7.31338		0.786245	7.32171		0.786245	7.26425		0.786245	7.25365		0.786245	7.21176		0.786245	7.23755		0.786245	7.12044		0.786245	7.1446		0.786245	7.22022		0.786245	7.22085		0.786245	7.23466		0.786245
	0.787325	7.28978		0.787325	7.14762		1.04977	46.2041		0.787325	7.31417		0.787325	7.31796		0.787325	7.31515		0.787325	7.3338		0.787325	7.26722		0.787325	7.27393		0.787325	7.21501		0.787325	7.23355		0.787325	7.1335		0.787325	7.14931		0.787325	7.23023		0.787325	7.23077		0.787325	7.23802		0.787325
	0.788405	7.30376		0.788405	7.14482		1.05121	45.7837		0.788405	7.32538		0.788405	7.31552		0.788405	7.31788		0.788405	7.34637		0.788405	7.27346		0.788405	7.29497		0.788405	7.21636		0.788405	7.22909		0.788405	7.14573		0.788405	7.15322		0.788405	7.23881		0.788405	7.24178		0.788405	7.24067		0.788405
	0.789485	7.31835		0.789485	7.14185		1.05265	45.3596		0.789485	7.33869		0.789485	7.31212		0.789485	7.32229		0.789485	7.35866		0.789485	7.28278		0.789485	7.31607		0.789485	7.21639		0.789485	7.22532		0.789485	7.15656		0.789485	7.15591		0.789485	7.24544		0.789485	7.25376		0.789485	7.24271		0.789485
	0.790565	7.33279		0.790565	7.13829		1.05409	44.9294		0.790565	7.35316		0.790565	7.30844		0.790565	7.32885		0.790565	7.37005		0.790565	7.29455		0.790565	7.33652		0.790565	7.21589		0.790565	7.22342		0.790565	7.16573		0.790565	7.15747		0.790565	7.24999		0.790565	7.26634		0.790565	7.24437		0.790565
	0.791645	7.3464		0.791645	7.13375		1.05553	44.492		0.791645	7.36781		0.791645	7.30481		0.791645	7.33762		0.791645	7.38		0.791645	7.30797		0.791645	7.35558		0.791645	7.21549		0.791645	7.22432		0.791645	7.17331		0.791645	7.15852		0.791645	7.25292		0.791645	7.27897		0.791645	7.24614		0.791645
	0.792725	7.35875		0.792725	7.12823		1.05697	44.0481		0.792725	7.38168		0.792725	7.30139		0.792725	7.34829		0.792725	7.38819		0.792725	7.32204		0.792725	7.37243		0.792725	7.21561		0.792725	7.22868		0.792725	7.1797		0.792725	7.16003		0.792725	7.25501		0.792725	7.29098		0.792725	7.24873		0.792725
	0.793805	7.36981		0.793805	7.1223		1.05841	43.5986		0.793805	7.39394		0.793805	7.29826		0.793805	7.36029		0.793805	7.39456		0.793805	7.33563		0.793805	7.3863		0.793805	7.21635		0.793805	7.2367		0.793805	7.18558		0.793805	7.16307		0.793805	7.25705		0.793805	7.30177		0.793805	7.25274		0.793805
	0.794885	7.37974		0.794885	7.11691		1.05985	43.1436		0.794885	7.40425		0.794885	7.29556		0.794885	7.3732		0.794885	7.39946		0.794885	7.34779		0.794885	7.39657		0.794885	7.2177		0.794885	7.24808		0.794885	7.19179		0.794885	7.16905		0.794885	7.25967		0.794885	7.3108		0.794885	7.25853		0.794885
	0.795965	7.38872		0.795965	7.11308		1.06129	42.6824		0.795965	7.41287		0.795965	7.2935		0.795965	7.3868		0.795965	7.40355		0.795965	7.3581		0.795965	7.40305		0.795965	7.21954		0.795965	7.26211		0.795965	7.19919		0.795965	7.18026		0.795965	7.26321		0.795965	7.31764		0.795965	7.26641		0.795965
	0.797045	7.39697		0.797045	7.11165		1.06273	42.2144		0.797045	7.42074		0.797045	7.29254		0.797045	7.40106		0.797045	7.40766		0.797045	7.36694		0.797045	7.40596		0.797045	7.22152		0.797045	7.27776		0.797045	7.20845		0.797045	7.20001		0.797045	7.26789		0.797045	7.32216		0.797045	7.27685		0.797045
	0.798125	7.4048		0.798125	7.11312		1.06417	41.7398		0.798125	7.42908		0.798125	7.29337		0.798125	7.41605		0.798125	7.41254		0.798125	7.37521		0.798125	7.40602		0.798125	7.22327		0.798125	7.29395		0.798125	7.21985		0.798125	7.23199		0.798125	7.27376		0.798125	7.32463		0.798125	7.29034		0.798125
	0.799205	7.41276		0.799205	7.11764		1.06561	41.2605		0.799205	7.43902		0.799205	7.29699		0.799205	7.43178		0.799205	7.41887		0.799205	7.38379		0.799205	7.40448		0.799205	7.22456		0.799205	7.30976		0.799205	7.23298		0.799205	7.27862		0.799205	7.28078		0.799205	7.32582		0.799205	7.30706		0.799205
	0.800285	7.42163		0.800285	7.12483		1.06705	40.7787		0.800285	7.45132		0.800285	7.30433		0.800285	7.44818		0.800285	7.42727		0.800285	7.3933		0.800285	7.40297		0.800285	7.22554		0.800285	7.32456		0.800285	7.24687		0.800285	7.33969		0.800285	7.28884		0.800285	7.32679		0.800285	7.32665		0.800285
	0.801365	7.43219		0.801365	7.13375		1.06849	40.2973		0.801365	7.46632		0.801365	7.31583		0.801365	7.4651		0.801365	7.43827		0.801365	7.40402		0.801365	7.40309		0.801365	7.22669		0.801365	7.33799		0.801365	7.26027		0.801365	7.41203		0.801365	7.29786		0.801365	7.32878		0.801365	7.34829		0.801365
	0.802445	7.44504		0.802445	7.14306		1.06993	39.8195		0.802445	7.48392		0.802445	7.33115		0.802445	7.48224		0.802445	7.45211		0.802445	7.41603		0.802445	7.40609		0.802445	7.22845		0.802445	7.35002		0.802445	7.27202		0.802445	7.49022		0.802445	7.30787		0.802445	7.333		0.802445	7.37107		0.802445
	0.803525	7.4605		0.803525	7.15145		1.07137	39.3486		0.803525	7.50369		0.803525	7.34932		0.803525	7.49915		0.803525	7.46849		0.803525	7.42922		0.803525	7.4126		0.803525	7.23119		0.803525	7.36095		0.803525	7.28129		0.803525	7.56752		0.803525	7.31903		0.803525	7.34031		0.803525	7.39422		0.803525
	0.804605	7.47853		0.804605	7.15806		1.07281	38.8878		0.804605	7.52484		0.804605	7.36917		0.804605	7.51531		0.804605	7.48663		0.804605	7.44329		0.804605	7.42268		0.804605	7.23522		0.804605	7.37142		0.804605	7.28762		0.804605	7.63627		0.804605	7.33166		0.804605	7.35109		0.804605	7.41711		0.804605
	0.805685	7.49876		0.805685	7.16271		1.07425	38.4385		0.805685	7.54632		0.805685	7.38949		0.805685	7.53021		0.805685	7.50556		0.805685	7.45774		0.805685	7.43585		0.805685	7.24092		0.805685	7.38223		0.805685	7.29088		0.805685	7.68837		0.805685	7.34611		0.805685	7.36514		0.805685	7.43911		0.805685
	0.806765	7.52041		0.806765	7.16581		1.07569	37.9998		0.806765	7.56698		0.806765	7.4092		0.806765	7.54362		0.806765	7.52454		0.806765	7.47228		0.806765	7.45119		0.806765	7.24862		0.806765	7.39424		0.806765	7.29124		0.806765	7.71696		0.806765	7.36257		0.806765	7.38186		0.806765	7.45963		0.806765
	0.807845	7.5425		0.807845	7.16803		1.07713	37.5685		0.807845	7.58594		0.807845	7.42729		0.807845	7.55577		0.807845	7.54333		0.807845	7.487		0.807845	7.46746		0.807845	7.25833		0.807845	7.4081		0.807845	7.28927		0.807845	7.71872		0.807845	7.38096		0.807845	7.4005		0.807845	7.47833		0.807845
	0.808925	7.56401		0.808925	7.17007		1.07857	37.1408		0.808925	7.60284		0.808925	7.44309		0.808925	7.56734		0.808925	7.56201		0.808925	7.50236		0.808925	7.48345		0.808925	7.26968		0.808925	7.42413		0.808925	7.28605		0.808925	7.69559		0.808925	7.40089		0.808925	7.42032		0.808925	7.49538		0.808925
	0.810005	7.58412		0.810005	7.17269		1.08001	36.7134		0.810005	7.61786		0.810005	7.45667		0.810005	7.57936		0.810005	7.58082		0.810005	7.51885		0.810005	7.49848		0.810005	7.28213		0.810005	7.44221		0.810005	7.28301		0.810005	7.65397		0.810005	7.42176		0.810005	7.44063		0.810005	7.51145		0.810005
	0.811085	7.60229		0.811085	7.17653		1.08145	36.2846		0.811085	7.63157		0.811085	7.46866		0.811085	7.5928		0.811085	7.59997		0.811085	7.53673		0.811085	7.51252		0.811085	7.2953		0.811085	7.46184		0.811085	7.2817		0.811085	7.60246		0.811085	7.44305		0.811085	7.46089		0.811085	7.5275		0.811085
	0.812165	7.61833		0.812165	7.18204		1.08289	35.854		0.812165	7.64465		0.812165	7.47985		0.812165	7.60841		0.812165	7.6197		0.812165	7.55593		0.812165	7.52606		0.812165	7.30895		0.812165	7.4824		0.812165	7.28343		0.812165	7.54928		0.812165	7.46437		0.812165	7.48085		0.812165	7.54447		0.812165
	0.813245	7.63243		0.813245	7.18916		1.08433	35.4225		0.813245	7.65772		0.813245	7.49068		0.813245	7.62665		0.813245	7.64023		0.813245	7.57617		0.813245	7.53975		0.813245	7.32281		0.813245	7.50329		0.813245	7.28899		0.813245	7.50124		0.813245	7.48543		0.813245	7.50073		0.813245	7.56302		0.813245
	0.814325	7.64525		0.814325	7.19734		1.08577	34.9919		0.814325	7.67131		0.814325	7.50114		0.814325	7.64773		0.814325	7.66166		0.814325	7.59695		0.814325	7.5541		0.814325	7.33647		0.814325	7.52401		0.814325	7.29867		0.814325	7.46341		0.814325	7.50606		0.814325	7.52106		0.814325	7.58336		0.814325
	0.815405	7.65768		0.815405	7.20587		1.08721	34.5652		0.815405	7.68587		0.815405	7.51114		0.815405	7.67149		0.815405	7.68365		0.815405	7.61763		0.815405	7.56961		0.815405	7.34935		0.815405	7.54407		0.815405	7.31246		0.815405	7.43869		0.815405	7.52614		0.815405	7.54254		0.815405	7.60518		0.815405
	0.816485	7.67058		0.816485	7.21426		1.08865	34.1456		0.816485	7.70171		0.816485	7.52083		0.816485	7.69726		0.816485	7.70538		0.816485	7.63763		0.816485	7.5868		0.816485	7.36093		0.816485	7.56306		0.816485	7.33011		0.816485	7.42738		0.816485	7.54563		0.816485	7.56578		0.816485	7.6277		0.816485
	0.817565	7.6846		0.817565	7.22224		1.09009	33.7347		0.817565	7.71898		0.817565	7.53047		0.817565	7.72383		0.817565	7.726		0.817565	7.6565		0.817565	7.60601		0.817565	7.37092		0.817565	7.58068		0.817565	7.35107		0.817565	7.42718		0.817565	7.56451		0.817565	7.59126		0.817565	7.64991		0.817565
	0.818645	7.7001		0.818645	7.22964		1.09153	33.3328		0.818645	7.73762		0.818645	7.54023		0.818645	7.74989		0.818645	7.74508		0.818645	7.67422		0.818645	7.62725		0.818645	7.37922		0.818645	7.59699		0.818645	7.37433		0.818645	7.43427		0.818645	7.58286		0.818645	7.61937		0.818645	7.6708		0.818645
	0.819725	7.71739		0.819725	7.23622		1.09297	32.9383		0.819725	7.75751		0.819725	7.55025		0.819725	7.77457		0.819725	7.76302		0.819725	7.69119		0.819725	7.65015		0.819725	7.38587		0.819725	7.61241		0.819725	7.39864		0.819725	7.44503		0.819725	7.60082		0.819725	7.65024		0.819725	7.68954		0.819725
	0.820805	7.73675		0.820805	7.24173		1.09441	32.549		0.820805	7.77852		0.820805	7.56082		0.820805	7.79761		0.820805	7.78084		0.820805	7.70814		0.820805	7.67425		0.820805	7.39109		0.820805	7.62764		0.820805	7.4228		0.820805	7.45706		0.820805	7.61869		0.820805	7.68367		0.820805	7.70571		0.820805
	0.821885	7.75825		0.821885	7.24612		1.09585	32.1631		0.821885	7.80059		0.821885	7.57251		0.821885	7.81927		0.821885	7.79979		0.821885	7.726		0.821885	7.69926		0.821885	7.39522		0.821885	7.64325		0.821885	7.44618		0.821885	7.46949		0.821885	7.63673		0.821885	7.71907		0.821885	7.71941		0.821885
	0.822965	7.78165		0.822965	7.24955		1.09729	31.7796		0.822965	7.82368		0.822965	7.58596		0.822965	7.84002		0.822965	7.82088		0.822965	7.74574		0.822965	7.72525		0.822965	7.39881		0.822965	7.65969		0.822965	7.46874		0.822965	7.48251		0.822965	7.65519		0.822965	7.75568		0.822965	7.73145		0.822965
	0.824045	7.80639		0.824045	7.25214		1.09873	31.3977		0.824045	7.8478		0.824045	7.60142		0.824045	7.86048		0.824045	7.84489		0.824045	7.76813		0.824045	7.75242		0.824045	7.40272		0.824045	7.67742		0.824045	7.49083		0.824045	7.4968		0.824045	7.67439		0.824045	7.79281		0.824045	7.74318		0.824045
	0.825125	7.8319		0.825125	7.25399		1.10017	31.0176		0.825125	7.87296		0.825125	7.61863		0.825125	7.8815		0.825125	7.87221		0.825125	7.79361		0.825125	7.78093		0.825125	7.40792		0.825125	7.69707		0.825125	7.51269		0.825125	7.513		0.825125	7.69492		0.825125	7.82996		0.825125	7.75631		0.825125
	0.826205	7.85789		0.826205	7.25529		1.10161	30.64		0.826205	7.89918		0.826205	7.63703		0.826205	7.90407		0.826205	7.90278		0.826205	7.82228		0.826205	7.81096		0.826205	7.41526		0.826205	7.71942		0.826205	7.5345		0.826205	7.53149		0.826205	7.71751		0.826205	7.86683		0.826205	7.77237		0.826205
	0.827285	7.88432		0.827285	7.25643		1.10305	30.2665		0.827285	7.92648		0.827285	7.65611		0.827285	7.9289		0.827285	7.93613		0.827285	7.85389		0.827285	7.84281		0.827285	7.42511		0.827285	7.74506		0.827285	7.55647		0.827285	7.55225		0.827285	7.74269		0.827285	7.90315		0.827285	7.79242		0.827285
	0.828365	7.9113		0.828365	7.25793		1.10449	29.8988		0.828365	7.95479		0.828365	7.67563		0.828365	7.95605		0.828365	7.97152		0.828365	7.88789		0.828365	7.877		0.828365	7.43721		0.828365	7.77414		0.828365	7.57902		0.828365	7.57493		0.828365	7.77057		0.828365	7.93878		0.828365	7.81699		0.828365
	0.829445	7.939		0.829445	7.26018		1.10593	29.5386		0.829445	7.98417		0.829445	7.69572		0.829445	7.98503		0.829445	8.00827		0.829445	7.92362		0.829445	7.91395		0.829445	7.45103		0.829445	7.8065		0.829445	7.60261		0.829445	7.59903		0.829445	7.80089		0.829445	7.97387		0.829445	7.84605		0.829445
	0.830525	7.96788		0.830525	7.2634		1.10737	29.1864		0.830525	8.01472		0.830525	7.7168		0.830525	8.0153		0.830525	8.04604		0.830525	7.96049		0.830525	7.95357		0.830525	7.46596		0.830525	7.84178		0.830525	7.62751		0.830525	7.62398		0.830525	7.8333		0.830525	8.00876		0.830525	7.8792		0.830525
	0.831605	7.99867		0.831605	7.26778		1.10881	28.8417		0.831605	8.0466		0.831605	7.73937		0.831605	8.04666		0.831605	8.08495		0.831605	7.99817		0.831605	7.99512		0.831605	7.48159		0.831605	7.87953		0.831605	7.65374		0.831605	7.64912		0.831605	7.8675		0.831605	8.04385		0.831605	7.91568		0.831605
	0.832685	8.03215		0.832685	7.27339		1.11025	28.504		0.832685	8.07987		0.832685	7.76384		0.832685	8.07933		0.832685	8.12544		0.832685	8.03669		0.832685	8.03741		0.832685	7.49756		0.832685	7.9191		0.832685	7.68124		0.832685	7.67378		0.832685	7.90332		0.832685	8.07943		0.832685	7.95447		0.832685
	0.833765	8.06875		0.833765	7.27999		1.11169	28.1728		0.833765	8.11446		0.833765	7.79039		0.833765	8.11375		0.833765	8.16823		0.833765	8.07639		0.833765	8.07933		0.833765	7.5136		0.833765	7.95966		0.833765	7.71013		0.833765	7.6974		0.833765	7.94045		0.833765	8.11582		0.833765	7.99442		0.833765
	0.834845	8.10838		0.834845	7.28687		1.11313	27.848		0.834845	8.15028		0.834845	7.81898		0.834845	8.1503		0.834845	8.2139		0.834845	8.11773		0.834845	8.12017		0.834845	7.52966		0.834845	8.00036		0.834845	7.74071		0.834845	7.71978		0.834845	7.97852		0.834845	8.15351		0.834845	8.03462		0.834845
	0.835925	8.15052		0.835925	7.29313		1.11457	27.5299		0.835925	8.18728		0.835925	7.84934		0.835925	8.18941		0.835925	8.26253		0.835925	8.16114		0.835925	8.1596		0.835925	7.54605		0.835925	8.04071		0.835925	7.77331		0.835925	7.74123		0.835925	8.01727		0.835925	8.19321		0.835925	8.07461		0.835925
	0.837005	8.19448		0.837005	7.29806		1.11601	27.2188		0.837005	8.22533		0.837005	7.88091		0.837005	8.23156		0.837005	8.31361		0.837005	8.20686		0.837005	8.19764		0.837005	7.56338		0.837005	8.08069		0.837005	7.80814		0.837005	7.76268		0.837005	8.05671		0.837005	8.23569		0.837005	8.11441		0.837005
	0.838085	8.23944		0.838085	7.30145		1.11745	26.9146		0.838085	8.26408		0.838085	7.91284		0.838085	8.27721		0.838085	8.36626		0.838085	8.25488		0.838085	8.23482		0.838085	7.58235		0.838085	8.12064		0.838085	7.84525		0.838085	7.7854		0.838085	8.09722		0.838085	8.28144		0.838085	8.15449		0.838085
	0.839165	8.28452		0.839165	7.30338		1.11889	26.6166		0.839165	8.30301		0.839165	7.94421		0.839165	8.32645		0.839165	8.41972		0.839165	8.30492		0.839165	8.27225		0.839165	7.60356		0.839165	8.16119		0.839165	7.8846		0.839165	7.8105		0.839165	8.13923		0.839165	8.33076		0.839165	8.19552		0.839165
	0.840245	8.3289		0.840245	7.30395		1.12033	26.3234		0.840245	8.34178		0.840245	7.9745		0.840245	8.37884		0.840245	8.47362		0.840245	8.35655		0.840245	8.31161		0.840245	7.62732		0.840245	8.20321		0.840245	7.92611		0.840245	7.83874		0.840245	8.18305		0.840245	8.38382		0.840245	8.23821		0.840245
	0.841325	8.37222		0.841325	7.30335		1.12177	26.0335		0.841325	8.38044		0.841325	8.00396		0.841325	8.43347		0.841325	8.52789		0.841325	8.40934		0.841325	8.35472		0.841325	7.65368		0.841325	8.24779		0.841325	7.96976		0.841325	7.87061		0.841325	8.22874		0.841325	8.44078		0.841325	8.28322		0.841325
	0.842405	8.41482		0.842405	7.30202		1.12321	25.745		0.842405	8.41958		0.842405	8.03333		0.842405	8.48937		0.842405	8.58245		0.842405	8.46303		0.842405	8.40311		0.842405	7.68245		0.842405	8.29591		0.842405	8.01559		0.842405	7.90652		0.842405	8.27631		0.842405	8.50168		0.842405	8.3312		0.842405
	0.843485	8.4577		0.843485	7.30085		1.12465	25.4571		0.843485	8.45998		0.843485	8.06342		0.843485	8.54578		0.843485	8.6373		0.843485	8.51775		0.843485	8.4577		0.843485	7.71328		0.843485	8.34827		0.843485	8.06384		0.843485	7.94676		0.843485	8.32584		0.843485	8.56636		0.843485	8.38277		0.843485
	0.844565	8.50218		0.844565	7.30095		1.12609	25.1697		0.844565	8.50243		0.844565	8.09477		0.844565	8.60227		0.844565	8.69278		0.844565	8.57411		0.844565	8.51887		0.844565	7.74586		0.844565	8.40514		0.844565	8.11495		0.844565	7.99112		0.844565	8.37765		0.844565	8.63455		0.844565	8.43848		0.844565
	0.845645	8.54965		0.845645	7.3034		1.12753	24.8836		0.845645	8.54767		0.845645	8.12776		0.845645	8.65865		0.845645	8.74972		0.845645	8.63302		0.845645	8.58644		0.845645	7.77989		0.845645	8.46663		0.845645	8.16947		0.845645	8.03871		0.845645	8.4322		0.845645	8.70612		0.845645	8.49879		0.845645
	0.846725	8.60134		0.846725	7.30902		1.12897	24.6008		0.846725	8.59634		0.846725	8.16284		0.846725	8.71488		0.846725	8.80907		0.846725	8.69544		0.846725	8.65996		0.846725	7.81505		0.846725	8.53286		0.846725	8.22803		0.846725	8.08843		0.846725	8.49016		0.846725	8.78111		0.846725	8.56396		0.846725
	0.847805	8.65826		0.847805	7.31839		1.13041	24.3238		0.847805	8.64902		0.847805	8.20051		0.847805	8.77103		0.847805	8.87145		0.847805	8.76205		0.847805	8.73897		0.847805	7.85094		0.847805	8.60391		0.847805	8.2912		0.847805	8.13956		0.847805	8.55238		0.847805	8.85972		0.847805	8.63409		0.847805
	0.848885	8.72114		0.848885	7.33193		1.13185	24.0558		0.848885	8.70611		0.848885	8.24102		0.848885	8.82743		0.848885	8.93707		0.848885	8.83319		0.848885	8.82311		0.848885	7.88705		0.848885	8.67981		0.848885	8.35938		0.848885	8.19212		0.848885	8.61986		0.848885	8.94219		0.848885	8.70927		0.848885
	0.849965	8.79043		0.849965	7.34983		1.13329	23.7999		0.849965	8.76763		0.849965	8.28437		0.849965	8.88476		0.849965	9.00613		0.849965	8.90901		0.849965	8.91212		0.849965	7.92304		0.849965	8.76048		0.849965	8.43285		0.849965	8.24663		0.849965	8.69355		0.849965	9.02866		0.849965	8.78957		0.849965
	0.851045	8.86618		0.851045	7.37199		1.13473	23.5578		0.851045	8.83339		0.851045	8.33048		0.851045	8.944		0.851045	9.0793		0.851045	8.98974		0.851045	9.00571		0.851045	7.95875		0.851045	8.84594		0.851045	8.51163		0.851045	8.30361		0.851045	8.77423		0.851045	9.11927		0.851045	8.87496		0.851045
	0.852125	8.94806		0.852125	7.39786		1.13617	23.3294		0.852125	8.90326		0.852125	8.37954		0.852125	9.00625		0.852125	9.15765		0.852125	9.07554		0.852125	9.10355		0.852125	7.99432		0.852125	8.93642		0.852125	8.59531		0.852125	8.36342		0.852125	8.86236		0.852125	9.21419		0.852125	8.96516		0.852125
	0.853205	9.03551		0.853205	7.42651		1.13761	23.1132		0.853205	8.97733		0.853205	8.43192		0.853205	9.07263		0.853205	9.24221		0.853205	9.16644		0.853205	9.20553		0.853205	8.03002		0.853205	9.03218		0.853205	8.68313		0.853205	8.42656		0.853205	8.95798		0.853205	9.31376		0.853205	9.05955		0.853205
	0.854285	9.12793		0.854285	7.45677		1.13905	22.9067		0.854285	9.05604		0.854285	8.48808		0.854285	9.1442		0.854285	9.33355		0.854285	9.26229		0.854285	9.31181		0.854285	8.06633		0.854285	9.13328		0.854285	8.77411		0.854285	8.49384		0.854285	9.06043		0.854285	9.41846		0.854285	9.15744		0.854285
	0.855365	9.22481		0.855365	7.48766		1.14049	22.7074		0.855365	9.13996		0.855365	8.54827		0.855365	9.22204		0.855365	9.43198		0.855365	9.36303		0.855365	9.42278		0.855365	8.10402		0.855365	9.23944		0.855365	8.86745		0.855365	8.56613		0.855365	9.16846		0.855365	9.52896		0.855365	9.25828		0.855365
	0.856445	9.32579		0.856445	7.51866		1.14193	22.5132		0.856445	9.2294		0.856445	8.6126		0.856445	9.30712		0.856445	9.53792		0.856445	9.469		0.856445	9.53882		0.856445	8.14421		0.856445	9.35007		0.856445	8.96275		0.856445	8.64407		0.856445	9.28047		0.856445	9.64572		0.856445	9.36189		0.856445
	0.857525	9.4306		0.857525	7.54989		1.14337	22.3219		0.857525	9.32418		0.857525	8.68124		0.857525	9.40011		0.857525	9.65197		0.857525	9.58092		0.857525	9.66023		0.857525	8.18822		0.857525	9.46449		0.857525	9.05993		0.857525	8.72784		0.857525	9.39504		0.857525	9.76902		0.857525	9.46856		0.857525
	0.858605	9.5389		0.858605	7.58189		1.14481	22.1318		0.858605	9.42357		0.858605	8.75441		0.858605	9.50129		0.858605	9.77459		0.858605	9.69948		0.858605	9.78757		0.858605	8.23736		0.858605	9.5821		0.858605	9.15922		0.858605	8.81741		0.858605	9.51147		0.858605	9.89903		0.858605	9.57897		0.858605
	0.859686	9.65043		0.859686	7.61557		1.14625	21.9415		0.859686	9.52646		0.859686	8.83236		0.859686	9.61045		0.859686	9.9058		0.859686	9.82515		0.859686	9.92162		0.859686	8.29266		0.859686	9.70257		0.859686	9.26104		0.859686	8.91278		0.859686	9.62983		0.859686	10.0361		0.859686	9.69418		0.859686
	0.860766	9.76515		0.860766	7.65202		1.14769	21.7507		0.860766	9.63175		0.860766	8.91527		0.860766	9.727		0.860766	10.0452		0.860766	9.95831		0.860766	10.0633		0.860766	8.35466		0.860766	9.82603		0.860766	9.3662		0.860766	9.014		0.860766	9.75093		0.860766	10.1808		0.860766	9.81546		0.860766
	0.861846	9.88321		0.861846	7.69247		1.14913	21.5595		0.861846	9.73861		0.861846	9.0033		0.861846	9.85006		0.861846	10.1925		0.861846	10.0993		0.861846	10.2132		0.861846	8.42332		0.861846	9.95316		0.861846	9.47595		0.861846	9.121		0.861846	9.87603		0.861846	10.3336		0.861846	9.94409		0.861846
	0.862926	10.0051		0.862926	7.73805		1.15057	21.3681		0.862926	9.84662		0.862926	9.09662		0.862926	9.97879		0.862926	10.3475		0.862926	10.2487		0.862926	10.3713		0.862926	8.49809		0.862926	10.0852		0.862926	9.59175		0.862926	9.2337		0.862926	10.0068		0.862926	10.4949		0.862926	10.0811		0.862926
	0.864006	10.1313		0.864006	7.78952		1.15201	21.1769		0.864006	9.95591		0.864006	9.19539		0.864006	10.1126		0.864006	10.5102		0.864006	10.4067		0.864006	10.5373		0.864006	8.57812		0.864006	10.2239		0.864006	9.71506		0.864006	9.35215		0.864006	10.1453		0.864006	10.6652		0.864006	10.2273		0.864006
	0.865086	10.2626		0.865086	7.8471		1.15345	20.9861		0.865086	10.0673		0.865086	9.29976		0.865086	10.2513		0.865086	10.6804		0.865086	10.5731		0.865086	10.7111		0.865086	8.66248		0.865086	10.3712		0.865086	9.84701		0.865086	9.47649		0.865086	10.2931		0.865086	10.8453		0.865086	10.3829		0.865086
	0.866166	10.3999		0.866166	7.91051		1.15489	20.7959		0.866166	10.1821		0.866166	9.40981		0.866166	10.3951		0.866166	10.8577		0.866166	10.7472		0.866166	10.8924		0.866166	8.75035		0.866166	10.5291		0.866166	9.98834		0.866166	9.60677		0.866166	10.4514		0.866166	11.0361		0.866166	10.5475		0.866166
	0.867246	10.544		0.867246	7.97923		1.15633	20.6069		0.867246	10.3022		0.867246	9.52545		0.867246	10.5447		0.867246	11.0417		0.867246	10.9282		0.867246	11.0813		0.867246	8.84103		0.867246	10.6989		0.867246	10.1395		0.867246	9.74283		0.867246	10.6201		0.867246	11.238		0.867246	10.7209		0.867246
	0.868326	10.696		0.868326	8.05279		1.15777	20.4199		0.868326	10.4289		0.868326	9.6465		0.868326	10.7007		0.868326	11.2321		0.868326	11.1154		0.868326	11.2777		0.868326	8.93418		0.868326	10.8815		0.868326	10.3009		0.868326	9.88447		0.868326	10.7989		0.868326	11.4511		0.868326	10.9026		0.868326
	0.869406	10.8574		0.869406	8.13075		1.15921	20.2365		0.869406	10.5634		0.869406	9.77246		0.869406	10.8643		0.869406	11.4293		0.869406	11.3086		0.869406	11.4821		0.869406	9.03007		0.869406	11.0774		0.869406	10.4723		0.869406	10.0317		0.869406	10.987		0.869406	11.6745		0.869406	11.0927		0.869406
	0.870486	11.0295		0.870486	8.21276		1.16065	20.0581		0.870486	10.7063		0.870486	9.90257		0.870486	11.0367		0.870486	11.6341		0.870486	11.5086		0.870486	11.6951		0.870486	9.12968		0.870486	11.2862		0.870486	10.6531		0.870486	10.1846		0.870486	11.184		0.870486	11.9076		0.870486	11.2914		0.870486
	0.871566	11.2135		0.871566	8.29854		1.16209	19.8861		0.871566	10.8579		0.871566	10.0359		0.871566	11.2188		0.871566	11.8469		0.871566	11.7166		0.871566	11.9179		0.871566	9.23439		0.871566	11.5072		0.871566	10.842		0.871566	10.3434		0.871566	11.3896		0.871566	12.1497		0.871566	11.4991		0.871566
	0.872646	11.4101		0.872646	8.38814		1.16353	19.7209		0.872646	11.0184		0.872646	10.1719		0.872646	11.4112		0.872646	12.0687		0.872646	11.9345		0.872646	12.1515		0.872646	9.3454		0.872646	11.7393		0.872646	11.0377		0.872646	10.5079		0.872646	11.6039		0.872646	12.4008		0.872646	11.7165		0.872646
	0.873726	11.6194		0.873726	8.48203		1.16497	19.563		0.873726	11.1881		0.873726	10.3099		0.873726	11.6136		0.873726	12.3		0.873726	12.1638		0.873726	12.3966		0.873726	9.46339		0.873726	11.9814		0.873726	11.2392		0.873726	10.6784		0.873726	11.8272		0.873726	12.6612		0.873726	11.9439		0.873726
	0.874806	11.8413		0.874806	8.58097		1.16641	19.4126		0.874806	11.3671		0.874806	10.4499		0.874806	11.8254		0.874806	12.5418		0.874806	12.4061		0.874806	12.6536		0.874806	9.58852		0.874806	12.233		0.874806	11.4461		0.874806	10.8558		0.874806	12.0601		0.874806	12.9322		0.874806	12.1822		0.874806
	0.875886	12.0755		0.875886	8.68568		1.16785	19.27		0.875886	11.5559		0.875886	10.5923		0.875886	12.046		0.875886	12.7946		0.875886	12.6619		0.875886	12.9225		0.875886	9.72058		0.875886	12.4939		0.875886	11.6585		0.875886	11.0415		0.875886	12.3039		0.875886	13.2158		0.875886	12.4319		0.875886
	0.876966	12.3216		0.876966	8.79668		1.16929	19.1351		0.876966	11.7549		0.876966	10.738		0.876966	12.2753		0.876966	13.0589		0.876966	12.9313		0.876966	13.203		0.876966	9.85921		0.876966	12.7643		0.876966	11.8764		0.876966	11.2368		0.876966	12.5598		0.876966	13.5143		0.876966	12.6934		0.876966
	0.878046	12.5787		0.878046	8.91446		1.17073	19.0074		0.878046	11.964		0.878046	10.8889		0.878046	12.5134		0.878046	13.3351		0.878046	13.2135		0.878046	13.4952		0.878046	10.0039		0.878046	13.0444		0.878046	12.1003		0.878046	11.4425		0.878046	12.8287		0.878046	13.8295		0.878046	12.9666		0.878046
	0.879126	12.8461		0.879126	9.03972		1.17217	18.886		0.879126	12.1831		0.879126	11.0469		0.879126	12.7601		0.879126	13.6236		0.879126	13.5068		0.879126	13.7989		0.879126	10.1541		0.879126	13.3343		0.879126	12.331		0.879126	11.659		0.879126	13.1107		0.879126	14.1624		0.879126	13.2514		0.879126
	0.880206	13.1229		0.880206	9.1733		1.17361	18.7703		0.880206	12.4112		0.880206	11.2141		0.880206	13.0158		0.880206	13.925		0.880206	13.8094		0.880206	14.1145		0.880206	10.3097		0.880206	13.6348		0.880206	12.5701		0.880206	11.8863		0.880206	13.4058		0.880206	14.513		0.880206	13.548		0.880206
	0.881286	13.4089		0.881286	9.31592		1.17505	18.6594		0.881286	12.6482		0.881286	11.392		0.881286	13.2815		0.881286	14.2402		0.881286	14.1206		0.881286	14.443		0.881286	10.4713		0.881286	13.9469		0.881286	12.8196		0.881286	12.1243		0.881286	13.7139		0.881286	14.8809		0.881286	13.8568		0.881286
	0.882366	13.7041		0.882366	9.46804		1.17649	18.5522		0.882366	12.894		0.882366	11.5814		0.882366	13.5589		0.882366	14.5702		0.882366	14.4404		0.882366	14.7856		0.882366	10.6401		0.882366	14.2719		0.882366	13.0814		0.882366	12.3724		0.882366	14.0353		0.882366	15.2651		0.882366	14.1778		0.882366
	0.883446	14.0083		0.883446	9.63005		1.17793	18.447		0.883446	13.1494		0.883446	11.7825		0.883446	13.8497		0.883446	14.9154		0.883446	14.7701		0.883446	15.1444		0.883446	10.8177		0.883446	14.6104		0.883446	13.3566		0.883446	12.6297		0.883446	14.37		0.883446	15.6646		0.883446	14.5106		0.883446
	0.884526	14.3211		0.884526	9.80256		1.17937	18.3422		0.884526	13.4153		0.884526	11.9947		0.884526	14.1548		0.884526	15.2761		0.884526	15.1112		0.884526	15.5213		0.884526	11.0053		0.884526	14.9624		0.884526	13.6462		0.884526	12.8955		0.884526	14.7183		0.884526	16.0781		0.884526	14.8548		0.884526
	0.885606	14.642		0.885606	9.98629		1.18081	18.2369		0.885606	13.6928		0.885606	12.217		0.885606	14.4747		0.885606	15.6521		0.885606	15.4653		0.885606	15.9182		0.885606	11.2034		0.885606	15.3277		0.885606	13.9507		0.885606	13.169		0.885606	15.08		0.885606	16.5048		0.885606	15.2103		0.885606
	0.886686	14.9711		0.886686	10.1816		1.18225	18.1304		0.886686	13.9836		0.886686	12.448		0.886686	14.8092		0.886686	16.0428		0.886686	15.834		0.886686	16.336		0.886686	11.4119		0.886686	15.7069		0.886686	14.2705		0.886686	13.4501		0.886686	15.4555		0.886686	16.945		0.886686	15.5776		0.886686
	0.887766	15.3088		0.887766	10.3881		1.18369	18.0227		0.887766	14.2887		0.887766	12.6863		0.887766	15.1586		0.887766	16.4474		0.887766	16.2185		0.887766	16.7744		0.887766	11.63		0.887766	16.1006		0.887766	14.6052		0.887766	13.7393		0.887766	15.8455		0.887766	17.4		0.887766	15.957		0.887766
	0.888846	15.6556		0.888846	10.6048		1.18513	17.914		0.888846	14.6091		0.888846	12.931		0.888846	15.5232		0.888846	16.8646		0.888846	16.6192		0.888846	17.232		0.888846	11.8562		0.888846	16.5093		0.888846	14.9538		0.888846	14.0378		0.888846	16.2504		0.888846	17.8714		0.888846	16.3488		0.888846
	0.889926	16.0119		0.889926	10.8303		1.18657	17.8048		0.889926	14.9442		0.889926	13.182		0.889926	15.9032		0.889926	17.293		0.889926	17.0351		0.889926	17.7062		0.889926	12.0889		0.889926	16.9328		0.889926	15.3145		0.889926	14.347		0.889926	16.6704		0.889926	18.3604		0.889926	16.7532		0.889926
	0.891006	16.378		0.891006	11.0633		1.18801	17.6963		0.891006	15.293		0.891006	13.4396		0.891006	16.2975		0.891006	17.7312		0.891006	17.4648		0.891006	18.1947		0.891006	12.3265		0.891006	17.3708		0.891006	15.6854		0.891006	14.6682		0.891006	17.106		0.891006	18.8675		0.891006	17.1707		0.891006
	0.892086	16.7546		0.892086	11.303		1.18945	17.5899		0.892086	15.654		0.892086	13.7046		0.892086	16.7051		0.892086	18.1789		0.892086	17.9063		0.892086	18.6951		0.892086	12.5683		0.892086	17.8233		0.892086	16.0653		0.892086	15.0029		0.892086	17.5573		0.892086	19.3927		0.892086	17.6023		0.892086
	0.893166	17.1421		0.893166	11.5489		1.19089	17.4868		0.893166	16.0258		0.893166	13.9774		0.893166	17.125		0.893166	18.6367		0.893166	18.3584		0.893166	19.2056		0.893166	12.8143		0.893166	18.2909		0.893166	16.4536		0.893166	15.3525		0.893166	18.0253		0.893166	19.936		0.893166	18.0494		0.893166
	0.894246	17.5413		0.894246	11.8011		1.19233	17.3875		0.894246	16.4068		0.894246	14.2586		0.894246	17.5568		0.894246	19.1063		0.894246	18.8205		0.894246	19.7252		0.894246	13.0656		0.894246	18.774		0.894246	16.8504		0.894246	15.7186		0.894246	18.5112		0.894246	20.4971		0.894246	18.5129		0.894246
	0.895326	17.9522		0.895326	12.0607		1.19377	17.2921		0.895326	16.7963		0.895326	14.5489		0.895326	18.0003		0.895326	19.5899		0.895326	19.2933		0.895326	20.2537		0.895326	13.3237		0.895326	19.2723		0.895326	17.2561		0.895326	16.1027		0.895326	19.0161		0.895326	21.0756		0.895326	18.9926		0.895326
	0.896406	18.375		0.896406	12.3292		1.19521	17.2006		0.896406	17.1941		0.896406	14.8488		0.896406	18.4553		0.896406	20.0907		0.896406	19.7792		0.896406	20.7921		0.896406	13.5905		0.896406	19.785		0.896406	17.6708		0.896406	16.5057		0.896406	19.5408		0.896406	21.6714		0.896406	19.4876		0.896406
	0.897486	18.8095		0.897486	12.6089		1.19665	17.1134		0.897486	17.601		0.897486	15.1587		0.897486	18.9219		0.897486	20.6122		0.897486	20.2816		0.897486	21.3427		0.897486	13.8679		0.897486	20.312		0.897486	18.095		0.897486	16.9278		0.897486	20.0859		0.897486	22.2844		0.897486	19.9966		0.897486
	0.898566	19.2563		0.898566	12.902		1.19809	17.0305		0.898566	18.0185		0.898566	15.4791		0.898566	19.4014		0.898566	21.1577		0.898566	20.8044		0.898566	21.9078		0.898566	14.1571		0.898566	20.8537		0.898566	18.5294		0.898566	17.3685		0.898566	20.6514		0.898566	22.915		0.898566	20.519		0.898566
	0.899646	19.7167		0.899646	13.2101		1.19953	16.9517		0.899646	18.4482		0.899646	15.8101		0.899646	19.8954		0.899646	21.7293		0.899646	21.3505		0.899646	22.4893		0.899646	14.458		0.899646	21.411		0.899646	18.9751		0.899646	17.8267		0.899646	21.2371		0.899646	23.5649		0.899646	21.0545		0.899646
	0.900726	20.1921		0.900726	13.5339		1.20097	16.8766		0.900726	18.8915		0.900726	16.1517		0.900726	20.406		0.900726	22.3273		0.900726	21.9211		0.900726	23.0881		0.900726	14.7695		0.900726	21.9849		0.900726	19.4332		0.900726	18.3007		0.900726	21.8422		0.900726	24.2367		0.900726	21.6029		0.900726
	0.901806	20.6835		0.901806	13.873		1.20241	16.8047		0.901806	19.3494		0.901806	16.504		0.901806	20.9345		0.901806	22.9505		0.901806	22.516		0.901806	23.7052		0.901806	15.0897		0.901806	22.5763		0.901806	19.9044		0.901806	18.788		0.901806	22.4658		0.901806	24.9332		0.901806	22.1637		0.901806
	0.902886	21.1914		0.902886	14.2268		1.20385	16.7358		0.902886	19.8228		0.902886	16.867		0.902886	21.4809		0.902886	23.5968		0.902886	23.1332		0.902886	24.3417		0.902886	15.417		0.902886	23.1858		0.902886	20.3888		0.902886	19.2858		0.902886	23.1063		0.902886	25.6567		0.902886	22.7362		0.902886
	0.903966	21.7157		0.903966	14.594		1.20529	16.6696		0.903966	20.3119		0.903966	17.2404		0.903966	22.0445		0.903966	24.2632		0.903966	23.7691		0.903966	24.9992		0.903966	15.7502		0.903966	23.8135		0.903966	20.8861		0.903966	19.7915		0.903966	23.7629		0.903966	26.4081		0.903966	23.3209		0.903966
	0.905046	22.2559		0.905046	14.974		1.20673	16.6057		0.905046	20.8161		0.905046	17.6236		0.905046	22.624		0.905046	24.9468		0.905046	24.4187		0.905046	25.6786		0.905046	16.0887		0.905046	24.4591		0.905046	21.3964		0.905046	20.3032		0.905046	24.4359		0.905046	27.1865		0.905046	23.9194		0.905046
	0.906126	22.8115		0.906126	15.3666		1.20817	16.5437		0.906126	21.3344		0.906126	18.0153		0.906126	23.2178		0.906126	25.6451		0.906126	25.0769		0.906126	26.3802		0.906126	16.4323		0.906126	25.1217		0.906126	21.9201		0.906126	20.82		0.906126	25.1266		0.906126	27.9909		0.906126	24.5336		0.906126
	0.907206	23.3818		0.907206	15.7727		1.20961	16.483		0.907206	21.8657		0.907206	18.4146		0.907206	23.8238		0.907206	26.3563		0.907206	25.7402		0.907206	27.1037		0.907206	16.7815		0.907206	25.8005		0.907206	22.4578		0.907206	21.3421		0.907206	25.8375		0.907206	28.8196		0.907206	25.1649		0.907206
	0.908286	23.9657		0.908286	16.1932		1.21105	16.4233		0.908286	22.409		0.908286	18.8211		0.908286	24.4403		0.908286	27.0801		0.908286	26.4075		0.908286	27.8488		0.908286	17.1376		0.908286	26.4949		0.908286	23.0091		0.908286	21.8703		0.908286	26.5708		0.908286	29.6703		0.908286	25.8131		0.908286
	0.909366	24.5622		0.909366	16.6296		1.21249	16.3647		0.909366	22.964		0.909366	19.2355		0.909366	25.0658		0.909366	27.8175		0.909366	27.0804		0.909366	28.6155		0.909366	17.5026		0.909366	27.2048		0.909366	23.5733		0.909366	22.4062		0.909366	27.3284		0.909366	30.5393		0.909366	26.4783		0.909366
	0.910446	25.1706		0.910446	17.0829		1.21393	16.3077		0.910446	23.5312		0.910446	19.6588		0.910446	25.7002		0.910446	28.5703		0.910446	27.7618		0.910446	29.4026		0.910446	17.8782		0.910446	27.93		0.910446	24.1495		0.910446	22.9513		0.910446	28.1118		0.910446	31.4219		0.910446	27.1607		0.910446
	0.911526	25.791		0.911526	17.5531		1.21537	16.2531		0.911526	24.1119		0.911526	20.0923		0.911526	26.3447		0.911526	29.3404		0.911526	28.4548		0.911526	30.2073		0.911526	18.2659		0.911526	28.6712		0.911526	24.7368		0.911526	23.5074		0.911526	28.9222		0.911526	32.314		0.911526	27.8611		0.911526
	0.912606	26.4241		0.912606	18.0392		1.21681	16.2016		0.912606	24.707		0.912606	20.5369		0.912606	27.0013		0.912606	30.1291		0.912606	29.162		0.912606	31.0261		0.912606	18.6661		0.912606	29.4293		0.912606	25.3356		0.912606	24.0759		0.912606	29.7604		0.912606	33.2139		0.912606	28.58		0.912606
	0.913686	27.0706		0.913686	18.5391		1.21825	16.1539		0.913686	25.3171		0.913686	20.9925		0.913686	27.6722		0.913686	30.937		0.913686	29.8851		0.913686	31.856		0.913686	19.0787		0.913686	30.2057		0.913686	25.9463		0.913686	24.6579		0.913686	30.6252		0.913686	34.1222		0.913686	29.3163		0.913686
	0.914766	27.7309		0.914766	19.0503		1.21969	16.1102		0.914766	25.9415		0.914766	21.4587		0.914766	28.3593		0.914766	31.7641		0.914766	30.625		0.914766	32.6958		0.914766	19.503		0.914766	31.0004		0.914766	26.5699		0.914766	25.2538		0.914766	31.5144		0.914766	35.0405		0.914766	30.0679		0.914766
	0.915846	28.4052		0.915846	19.5705		1.22113	16.0708		0.915846	26.5792		0.915846	21.9347		0.915846	29.0643		0.915846	32.61		0.915846	31.3813		0.915846	33.5451		0.915846	19.9381		0.915846	31.8122		0.915846	27.2075		0.915846	25.8633		0.915846	32.4251		0.915846	35.9702		0.915846	30.8318		0.915846
	0.916926	29.0929		0.916926	20.0979		1.22257	16.0356		0.916926	27.2284		0.916926	22.4192		0.916926	29.7884		0.916926	33.474		0.916926	32.1523		0.916926	34.4042		0.916926	20.3832		0.916926	32.6384		0.916926	27.8605		0.916926	26.4855		0.916926	33.3549		0.916926	36.9127		0.916926	31.6053		0.916926
	0.918006	29.7934		0.918006	20.6321		1.22401	16.0047		0.918006	27.887		0.918006	22.9107		0.918006	30.5324		0.918006	34.3552		0.918006	32.9357		0.918006	35.2732		0.918006	20.8373		0.918006	33.4764		0.918006	28.5304		0.918006	27.1197		0.918006	34.3021		0.918006	37.8701		0.918006	32.3858		0.918006
	0.919086	30.5053		0.919086	21.1742		1.22545	15.9778		0.919086	28.5524		0.919086	23.4075		0.919086	31.2957		0.919086	35.2526		0.919086	33.729		0.919086	36.1533		0.919086	21.2993		0.919086	34.3242		0.919086	29.2182		0.919086	27.7655		0.919086	35.2647		0.919086	38.846		0.919086	33.1711		0.919086
	0.920166	31.2267		0.920166	21.7261		1.22689	15.9541		0.920166	29.2227		0.920166	23.9084		0.920166	32.0764		0.920166	36.1647		0.920166	34.5313		0.920166	37.0462		0.920166	21.7684		0.920166	35.181		0.920166	29.9238		0.920166	28.4228		0.920166	36.2404		0.920166	39.8431		0.920166	33.9594		0.920166
	0.921246	31.9553		0.921246	22.2909		1.22833	15.9328		0.921246	29.898		0.921246	24.4133		0.921246	32.8719		0.921246	37.0902		0.921246	35.3432		0.921246	37.9548		0.921246	22.2443		0.921246	36.0468		0.921246	30.6458		0.921246	29.0919		0.921246	37.2273		0.921246	40.8622		0.921246	34.75		0.921246
	0.922326	32.6885		0.922326	22.8712		1.22977	15.9132		0.922326	30.5802		0.922326	24.9224		0.922326	33.6793		0.922326	38.0275		0.922326	36.1666		0.922326	38.8812		0.922326	22.7275		0.922326	36.9222		0.922326	31.3816		0.922326	29.7732		0.922326	38.2243		0.922326	41.9006		0.922326	35.5435		0.922326
	0.923406	33.4236		0.923406	23.4686		1.23121	15.8951		0.923406	31.2725		0.923406	25.436		0.923406	34.4964		0.923406	38.9755		0.923406	37.0027		0.923406	39.8263		0.923406	23.2194		0.923406	37.8082		0.923406	32.1279		0.923406	30.4669		0.923406	39.2314		0.923406	42.9538		0.923406	36.3417		0.923406
	0.924486	34.1585		0.924486	24.0836		1.23265	15.8788		0.924486	31.9775		0.924486	25.9544		0.924486	35.321		0.924486	39.9327		0.924486	37.8522		0.924486	40.7893		0.924486	23.721		0.924486	38.7065		0.924486	32.8811		0.924486	31.1732		0.924486	40.2491		0.924486	44.0173		0.924486	37.147		0.924486
	0.925566	34.8924		0.925566	24.7157		1.23409	15.8649		0.925566	32.6967		0.925566	26.4771		0.925566	36.1512		0.925566	40.8979		0.925566	38.714		0.925566	41.7686		0.925566	24.2328		0.925566	39.6188		0.925566	33.6375		0.925566	31.8918		0.925566	41.2777		0.925566	45.0878		0.925566	37.9614		0.925566
	0.926646	35.6255		0.926646	25.3642		1.23553	15.854		0.926646	33.4314		0.926646	27.0036		0.926646	36.9853		0.926646	41.8703		0.926646	39.5874		0.926646	42.7621		0.926646	24.7547		0.926646	40.5467		0.926646	34.3933		0.926646	32.621		0.926646	42.3172		0.926646	46.1628		0.926646	38.7861		0.926646
	0.927726	36.359		0.927726	26.0277		1.23697	15.8461		0.927726	34.182		0.927726	27.5334		0.927726	37.8227		0.927726	42.8502		0.927726	40.472		0.927726	43.767		0.927726	25.2861		0.927726	41.4905		0.927726	35.1465		0.927726	33.3585		0.927726	43.368		0.927726	47.2398		0.927726	39.6218		0.927726
	0.928806	37.0945		0.928806	26.7039		1.23841	15.8417		0.928806	34.9476		0.928806	28.0662		0.928806	38.6643		0.928806	43.8388		0.928806	41.3675		0.928806	44.7797		0.928806	25.8264		0.928806	42.4489		0.928806	35.8964		0.928806	34.1009		0.928806	44.4305		0.928806	48.3166		0.928806	40.4687		0.928806
	0.929886	37.8335		0.929886	27.3903		1.23985	15.8411		0.929886	35.7253		0.929886	28.6019		0.929886	39.5117		0.929886	44.8381		0.929886	42.2737		0.929886	45.7953		0.929886	26.3744		0.929886	43.4189		0.929886	36.6445		0.929886	34.8446		0.929886	45.5047		0.929886	49.3928		0.929886	41.3265		0.929886
	0.930966	38.5772		0.930966	28.084		1.24129	15.8446		0.930966	36.5108		0.930966	29.1418		0.930966	40.3663		0.930966	45.8502		0.930966	43.19		0.930966	46.8098		0.930966	26.9284		0.930966	44.3969		0.930966	37.3926		0.930966	35.5867		0.930966	46.5903		0.930966	50.4715		0.930966	42.1939		0.930966
	0.932046	39.3264		0.932046	28.7823		1.24273	15.8526		0.932046	37.3008		0.932046	29.6873		0.932046	41.2285		0.932046	46.8764		0.932046	44.1161		0.932046	47.8208		0.932046	27.486		0.932046	45.3801		0.932046	38.1426		0.932046	36.3257		0.932046	47.6871		0.932046	51.5578		0.932046	43.0695		0.932046
	0.933126	40.0816		0.933126	29.4833		1.24417	15.865		0.933126	38.0929		0.933126	30.2398		0.933126	42.0979		0.933126	47.9168		0.933126	45.052		0.933126	48.8287		0.933126	28.0451		0.933126	46.3668		0.933126	38.8968		0.933126	37.0617		0.933126	48.7953		0.933126	52.6565		0.933126	43.9513		0.933126
	0.934206	40.8429		0.934206	30.1847		1.24561	15.8821		0.934206	38.8863		0.934206	30.8		0.934206	42.9745		0.934206	48.9699		0.934206	45.998		0.934206	49.8358		0.934206	28.6049		0.934206	47.3556		0.934206	39.6581		0.934206	37.7972		0.934206	49.9158		0.934206	53.7705		0.934206	44.8379		0.934206
	0.935286	41.61		0.935286	30.8849		1.24705	15.9048		0.935286	39.6799		0.935286	31.3673		0.935286	43.858		0.935286	50.0328		0.935286	46.9529		0.935286	50.8449		0.935286	29.1653		0.935286	48.3457		0.935286	40.4301		0.935286	38.5354		0.935286	51.0501		0.935286	54.9008		0.935286	45.7277		0.935286
	0.936366	42.383		0.936366	31.5826		1.24849	15.9342		0.936366	40.4723		0.936366	31.9402		0.936366	44.748		0.936366	51.1022		0.936366	47.9137		0.936366	51.8582		0.936366	29.7266		0.936366	49.3377		0.936366	41.2161		0.936366	39.2805		0.936366	52.1994		0.936366	56.0481		0.936366	46.6188		0.936366
	0.937446	43.162		0.937446	32.2781		1.24993	15.971		0.937446	41.2633		0.937446	32.5168		0.937446	45.6435		0.937446	52.1746		0.937446	48.8764		0.937446	52.8779		0.937446	30.2888		0.937446	50.3339		0.937446	42.0174		0.937446	40.0365		0.937446	53.365		0.937446	57.2136		0.937446	47.5093		0.937446
	0.938526	43.9478		0.938526	32.9734		1.25137	16.0155		0.938526	42.0535		0.938526	33.0947		0.938526	46.5442		0.938526	53.2469		0.938526	49.838		0.938526	53.9058		0.938526	30.852		0.938526	51.3378		0.938526	42.8327		0.938526	40.8067		0.938526	54.5478		0.938526	58.3977		0.938526	48.3979		0.938526
	0.939606	44.7417		0.939606	33.672		1.25281	16.067		0.939606	42.8449		0.939606	33.6716		0.939606	47.451		0.939606	54.3162		0.939606	50.7985		0.939606	54.9433		0.939606	31.417		0.939606	52.3527		0.939606	43.6588		0.939606	41.5931		0.939606	55.7469		0.939606	59.5984		0.939606	49.285		0.939606
	0.940686	45.5455		0.940686	34.3788		1.25425	16.1248		0.940686	43.639		0.940686	34.2462		0.940686	48.3668		0.940686	55.3808		0.940686	51.7604		0.940686	55.9901		0.940686	31.9853		0.940686	53.3805		0.940686	44.4922		0.940686	42.3956		0.940686	56.9595		0.940686	60.812		0.940686	50.1726		0.940686
	0.941766	46.361		0.941766	35.0986		1.25569	16.1871		0.941766	44.437		0.941766	34.8186		0.941766	49.2948		0.941766	56.441		0.941766	52.7275		0.941766	57.0451		0.941766	32.5592		0.941766	54.4214		0.941766	45.3297		0.941766	43.2123		0.941766	58.1812		0.941766	62.0339		0.941766	51.0637		0.941766
	0.942846	47.1892		0.942846	35.8364		1.25713	16.2524		0.942846	45.2396		0.942846	35.391		0.942846	50.2375		0.942846	57.5003		0.942846	53.7041		0.942846	58.1076		0.942846	33.1416		0.942846	55.4753		0.942846	46.1687		0.942846	44.0404		0.942846	59.4079		0.942846	63.2608		0.942846	51.9617		0.942846
	0.943926	48.0316		0.943926	36.5964		1.25857	16.3189		0.943926	46.0481		0.943926	35.9668		0.943926	51.196		0.943926	58.5645		0.943926	54.6952		0.943926	59.1791		0.943926	33.7355		0.943926	56.5418		0.943926	47.0075		0.943926	44.8776		0.943926	60.6372		0.943926	64.4913		0.943926	52.8707		0.943926
	0.945006	48.8897		0.945006	37.3808		1.26001	16.3856		0.945006	46.8636		0.945006	36.5496		0.945006	52.1711		0.945006	59.6402		0.945006	55.7062		0.945006	60.2627		0.945006	34.3436		0.945006	57.6196		0.945006	47.8462		0.945006	45.7225		0.945006	61.8682		0.945006	65.7252		0.945006	53.7958		0.945006
	0.946086	49.7656		0.946086	38.1899		1.26145	16.4523		0.946086	47.6871		0.946086	37.1429		0.946086	53.164		0.946086	60.7325		0.946086	56.7411		0.946086	61.3615		0.946086	34.968		0.946086	58.7073		0.946086	48.6874		0.946086	46.575		0.946086	63.101		0.946086	66.9632		0.946086	54.7418		0.946086
	0.947166	50.6602		0.947166	39.022		1.26289	16.5196		0.947166	48.5181		0.947166	37.7495		0.947166	54.1762		0.947166	61.8448		0.947166	57.7998		0.947166	62.4768		0.947166	35.6096		0.947166	59.8048		0.947166	49.5366		0.947166	47.4368		0.947166	64.3369		0.947166	68.2061		0.947166	55.7126		0.947166
	0.948246	51.5729		0.948246	39.8742		1.26433	16.5886		0.948246	49.3554		0.948246	38.3721		0.948246	55.2079		0.948246	62.9787		0.948246	58.877		0.948246	63.6084		0.948246	36.2679		0.948246	60.9149		0.948246	50.4011		0.948246	48.3104		0.948246	65.5799		0.948246	69.4553		0.948246	56.7109		0.948246
	0.949326	52.5021		0.949326	40.7427		1.26577	16.6608		0.949326	50.198		0.949326	39.0127		0.949326	56.2578		0.949326	64.1351		0.949326	59.9658		0.949326	64.7555		0.949326	36.9407		0.949326	62.0425		0.949326	51.2874		0.949326	49.1987		0.949326	66.8362		0.949326	70.7135		0.949326	57.7382		0.949326
	0.950406	53.4458		0.950406	41.6241		1.26721	16.7383		0.950406	51.0461		0.950406	39.6726		0.950406	57.3228		0.950406	65.3135		0.950406	61.0605		0.950406	65.9172		0.950406	37.6255		0.950406	63.1926		0.950406	52.1998		0.950406	50.1038		0.950406	68.1133		0.950406	71.9839		0.950406	58.7948		0.950406
	0.951486	54.4022		0.951486	42.5156		1.26865	16.8233		0.951486	51.9016		0.951486	40.3524		0.951486	58.4		0.951486	66.5109		0.951486	62.1591		0.951486	67.092		0.951486	38.3195		0.951486	64.3687		0.951486	53.1394		0.951486	51.0262		0.951486	69.4162		0.951486	73.2699		0.951486	59.8803		0.951486
	0.952566	55.369		0.952566	43.4164		1.27009	16.9175		0.952566	52.7668		0.952566	41.0521		0.952566	59.4872		0.952566	67.7231		0.952566	63.263		0.952566	68.2779		0.952566	39.0207		0.952566	65.5726		0.952566	54.105		0.952566	51.9655		0.952566	70.7468		0.952566	74.5734		0.952566	60.9927		0.952566
	0.953646	56.3441		0.953646	44.3278		1.27153	17.0219		0.953646	53.6446		0.953646	41.7718		0.953646	60.583		0.953646	68.9464		0.953646	64.3753		0.953646	69.474		0.953646	39.7288		0.953646	66.8058		0.953646	55.0944		0.953646	52.921		0.953646	72.1047		0.953646	75.8952		0.953646	62.129		0.953646
	0.954726	57.3254		0.954726	45.2528		1.27297	17.1363		0.954726	54.538		0.954726	42.5115		0.954726	61.6863		0.954726	70.1804		0.954726	65.5011		0.954726	70.6828		0.954726	40.4457		0.954726	68.0683		0.954726	56.1049		0.954726	53.8916		0.954726	73.49		0.954726	77.2354		0.954726	63.2856		0.954726
	0.955806	58.3113		0.955806	46.1951		1.27441	17.2603		0.955806	55.4495		0.955806	43.2702		0.955806	62.7959		0.955806	71.4288		0.955806	66.6478		0.955806	71.9102		0.955806	41.175		0.955806	69.358		0.955806	57.1342		0.955806	54.8764		0.955806	74.9041		0.955806	78.5953		0.955806	64.4589		0.955806
	0.956886	59.3016		0.956886	47.1577		1.27585	17.3931		0.956886	56.3813		0.956886	44.0457		0.956886	63.9122		0.956886	72.6981		0.956886	67.825		0.956886	73.1638		0.956886	41.9212		0.956886	70.6703		0.956886	58.1804		0.956886	55.8752		0.956886	76.3475		0.956886	79.9783		0.956886	65.6456		0.956886
	0.957966	60.2966		0.957966	48.1433		1.27729	17.5336		0.957966	57.3349		0.957966	44.8353		0.957966	65.0378		0.957966	73.9949		0.957966	69.0418		0.957966	74.4496		0.957966	42.6884		0.957966	72.0001		0.957966	59.2429		0.957966	56.8893		0.957966	77.8194		0.957966	81.3891		0.957966	66.8434		0.957966
	0.959046	61.297		0.959046	49.1544		1.27873	17.6799		0.959046	58.3106		0.959046	45.6361		0.959046	66.1785		0.959046	75.3256		0.959046	70.3043		0.959046	75.7713		0.959046	43.4793		0.959046	73.3438		0.959046	60.3224		0.959046	57.9217		0.959046	79.3176		0.959046	82.8329		0.959046	68.0504		0.959046
	0.960126	62.304		0.960126	50.193		1.28017	17.8303		0.960126	59.3077		0.960126	46.4455		0.960126	67.3418		0.960126	76.6963		0.960126	71.6134		0.960126	77.1308		0.960126	44.2953		0.960126	74.7001		0.960126	61.4202		0.960126	58.977		0.960126	80.842		0.960126	84.3142		0.960126	69.2657		0.960126
	0.961206	63.3179		0.961206	51.2606		1.28161	17.9832		0.961206	60.3252		0.961206	47.2616		0.961206	68.5349		0.961206	78.1123		0.961206	72.966		0.961206	78.528		0.961206	45.136		0.961206	76.0687		0.961206	62.5375		0.961206	60.0593		0.961206	82.3959		0.961206	85.837		0.961206	70.4899		0.961206
	0.962286	64.3389		0.962286	52.3587		1.28305	18.1374		0.962286	61.3622		0.962286	48.0825		0.962286	69.7631		0.962286	79.5767		0.962286	74.3566		0.962286	79.9597		0.962286	46.0003		0.962286	77.4497		0.962286	63.6737		0.962286	61.1713		0.962286	83.9844		0.962286	87.4043		0.962286	71.7257		0.962286
	0.963366	65.3676		0.963366	53.4895		1.28449	18.2928		0.963366	62.4193		0.963366	48.9071		0.963366	71.0288		0.963366	81.0887		0.963366	75.7796		0.963366	81.4195		0.963366	46.8867		0.963366	78.8424		0.963366	64.8268		0.963366	62.3138		0.963366	85.6117		0.963366	89.0177		0.963366	72.9784		0.963366
	0.964446	66.4066		0.964446	54.6568		1.28593	18.4495		0.964446	63.4984		0.964446	49.7348		0.964446	72.3318		0.964446	82.6438		0.964446	77.2301		0.964446	82.9001		0.964446	47.7931		0.964446	80.2473		0.964446	65.993		0.964446	63.4858		0.964446	87.2797		0.964446	90.6756		0.964446	74.2543		0.964446
	0.965526	67.4602		0.965526	55.8651		1.28737	18.6082		0.965526	64.6021		0.965526	50.5661		0.965526	73.6698		0.965526	84.2345		0.965526	78.7027		0.965526	84.3949		0.965526	48.7168		0.965526	81.665		0.965526	67.1675		0.965526	64.6847		0.965526	88.9887		0.965526	92.372		0.965526	75.5583		0.965526
	0.966606	68.5336		0.966606	57.1171		1.28881	18.7695		0.966606	65.7325		0.966606	51.4026		0.966606	75.0393		0.966606	85.8523		0.966606	80.1916		0.966606	85.8999		0.966606	49.6555		0.966606	83.0964		0.966606	68.3456		0.966606	65.9061		0.966606	90.7388		0.966606	94.0962		0.966606	76.893		0.966606
	0.967686	69.6312		0.967686	58.4125		1.29025	18.9342		0.967686	66.8904		0.967686	52.2462		0.967686	76.4344		0.967686	87.487		0.967686	81.6913		0.967686	87.4117		0.967686	50.6071		0.967686	84.5416		0.967686	69.5228		0.967686	67.144		0.967686	92.5298		0.967686	95.8341		0.967686	78.259		0.967686
	0.968766	70.7557		0.968766	59.7478		1.29169	19.1032		0.968766	68.0756		0.968766	53.099		0.968766	77.848		0.968766	89.1283		0.968766	83.1986		0.968766	88.9267		0.968766	51.5705		0.968766	86.0004		0.968766	70.6953		0.968766	68.391		0.968766	94.3585		0.968766	97.5706		0.968766	79.6557		0.968766
	0.969846	71.9077		0.969846	61.1182		1.29313	19.2769		0.969846	69.2874		0.969846	53.962		0.969846	79.2719		0.969846	90.7666		0.969846	84.7131		0.969846	90.4415		0.969846	52.5445		0.969846	87.4731		0.969846	71.8598		0.969846	69.6401		0.969846	96.2165		0.969846	99.293		0.969846	81.0812		0.969846
	0.970926	73.0858		0.970926	62.5175		1.29457	19.4552		0.970926	70.5241		0.970926	54.8356		0.970926	80.6984		0.970926	92.3952		0.970926	86.2355		0.970926	91.9544		0.970926	53.5257		0.970926	88.962		0.970926	73.014		0.970926	70.8849		0.970926	98.0918		0.970926	100.992		0.970926	82.5309		0.970926
	0.972006	74.2846		0.972006	63.9383		1.29601	19.6377		0.972006	71.7825		0.972006	55.7196		0.972006	82.1218		0.972006	94.0109		0.972006	87.7642		0.972006	93.4636		0.972006	54.5098		0.972006	90.4698		0.972006	74.155		0.972006	72.1199		0.972006	99.9725		0.972006	102.662		0.972006	83.9971		0.972006
	0.973086	75.4955		0.973086	65.3721		1.29745	19.8235		0.973086	73.0571		0.973086	56.6127		0.973086	83.5388		0.973086	95.6131		0.973086	89.2934		0.973086	94.9664		0.973086	55.4933		0.973086	91.9982		0.973086	75.2805		0.973086	73.3407		0.973086	101.85		0.973086	104.3		0.973086	85.4709		0.973086
	0.974166	76.7075		0.974166	66.8108		1.29889	20.0121		0.974166	74.3412		0.974166	57.5124		0.974166	84.9482		0.974166	97.2024		0.974166	90.8141		0.974166	96.458		0.974166	56.4754		0.974166	93.5445		0.974166	76.389		0.974166	74.5442		0.974166	103.722		0.974166	105.91		0.974166	86.9431		0.974166
	0.975246	77.9093		0.975246	68.2497		1.30033	20.2034		0.975246	75.6288		0.975246	58.4148		0.975246	86.3499		0.975246	98.7791		0.975246	92.3162		0.975246	97.9327		0.975246	57.4576		0.975246	95.1018		0.975246	77.4797		0.975246	75.7293		0.975246	105.583		0.975246	107.499		0.975246	88.4055		0.975246
	0.976326	79.0924		0.976326	69.688		1.30177	20.3974		0.976326	76.9151		0.976326	59.3144		0.976326	87.7438		0.976326	100.343		0.976326	93.7901		0.976326	99.3861		0.976326	58.4409		0.976326	96.6604		0.976326	78.5519		0.976326	76.897		0.976326	107.43		0.976326	109.078		0.976326	89.8502		0.976326
	0.977406	80.2517		0.977406	71.1281		1.30321	20.5942		0.977406	78.1957		0.977406	60.2048		0.977406	89.1304		0.977406	101.891		0.977406	95.2273		0.977406	100.814		0.977406	59.4244		0.977406	98.2093		0.977406	79.6034		0.977406	78.0496		0.977406	109.259		0.977406	110.656		0.977406	91.2693		0.977406
	0.978486	81.3863		0.978486	72.5739		1.30465	20.7935		0.978486	79.4657		0.978486	61.0794		0.978486	90.5116		0.978486	103.418		0.978486	96.62		0.978486	102.213		0.978486	60.4063		0.978486	99.7371		0.978486	80.6307		0.978486	79.1885		0.978486	111.066		0.978486	112.242		0.978486	92.6556		0.978486
	0.979566	82.4982		0.979566	74.0295		1.30609	20.9949		0.979566	80.7201		0.979566	61.9322		0.979566	91.8913		0.979566	104.916		0.979566	97.9621		0.979566	103.576		0.979566	61.3857		0.979566	101.231		0.979566	81.631		0.979566	80.3129		0.979566	112.848		0.979566	113.831		0.979566	94.0031		0.979566
	0.980646	83.5902		0.980646	75.4998		1.30753	21.1976		0.980646	81.9544		0.980646	62.7586		0.980646	93.272		0.980646	106.375		0.980646	99.2515		0.980646	104.898		0.980646	62.3625		0.980646	102.678		0.980646	82.6015		0.980646	81.4195		0.980646	114.6		0.980646	115.416		0.980646	95.3072		0.980646
	0.981726	84.6638		0.981726	76.991		1.30897	21.4008		0.981726	83.1655		0.981726	63.5557		0.981726	94.6524		0.981726	107.785		0.981726	100.491		0.981726	106.174		0.981726	63.3351		0.981726	104.069		0.981726	83.5395		0.981726	82.5029		0.981726	116.313		0.981726	116.985		0.981726	96.5652		0.981726
	0.982806	85.7197		0.982806	78.508		1.31041	21.6034		0.982806	84.3494		0.982806	64.3222		0.982806	96.0258		0.982806	109.141		0.982806	101.685		0.982806	107.403		0.982806	64.2999		0.982806	105.398		0.982806	84.442		0.982806	83.5566		0.982806	117.976		0.982806	118.528		0.982806	97.777		0.982806
	0.983886	86.7568		0.983886	80.0518		1.31185	21.8042		0.983886	85.5006		0.983886	65.0575		0.983886	97.3824		0.983886	110.444		0.983886	102.841		0.983886	108.58		0.983886	65.2515		0.983886	106.662		0.983886	85.3071		0.983886	84.5726		0.983886	119.578		0.983886	120.034		0.983886	98.9448		0.983886
	0.984966	87.773		0.984966	81.6168		1.31329	22.0019		0.984966	86.6139		0.984966	65.762		0.984966	98.7124		0.984966	111.702		0.984966	103.958		0.984966	109.706		0.984966	66.1853		0.984966	107.864		0.984966	86.135		0.984966	85.5419		0.984966	121.112		0.984966	121.497		0.984966	100.071		0.984966
	0.986046	88.764		0.986046	83.1921		1.31473	22.1961		0.986046	87.6855		0.986046	66.4363		0.986046	100.006		0.986046	112.925		0.986046	105.032		0.986046	110.78		0.986046	67.0987		0.986046	109.004		0.986046	86.9288		0.986046	86.4554		0.986046	122.578		0.986046	122.909		0.986046	101.156		0.986046
	0.987126	89.723		0.987126	84.7626		1.31617	22.3868		0.987126	88.7145		0.987126	67.0814		0.987126	101.253		0.987126	114.123		0.987126	106.052		0.987126	111.8		0.987126	67.9894		0.987126	110.087		0.987126	87.6918		0.987126	87.3065		0.987126	123.972		0.987126	124.267		0.987126	102.196		0.987126
	0.988206	90.6429		0.988206	86.312		1.31761	22.5744		0.988206	89.702		0.988206	67.6985		0.988206	102.442		0.988206	115.301		0.988206	107.01		0.988206	112.764		0.988206	68.8536		0.988206	111.115		0.988206	88.4256		0.988206	88.0939		0.988206	125.295		0.988206	125.568		0.988206	103.186		0.988206
	0.989286	91.5188		0.989286	87.8232		1.31905	22.7597		0.989286	90.6499		0.989286	68.289		0.989286	103.557		0.989286	116.461		0.989286	107.898		0.989286	113.665		0.989286	69.6857		0.989286	112.093		0.989286	89.1298		0.989286	88.8223		0.989286	126.549		0.989286	126.811		0.989286	104.121		0.989286
	0.990366	92.3484		0.990366	89.2787		1.32049	22.9433		0.990366	91.5615		0.990366	68.8533		0.990366	104.59		0.990366	117.598		0.990366	108.71		0.990366	114.497		0.990366	70.4788		0.990366	113.022		0.990366	89.8025		0.990366	89.5005		0.990366	127.737		0.990366	127.994		0.990366	104.998		0.990366
	0.991446	93.131		0.991446	90.6638		1.32193	23.1257		0.991446	92.4415		0.991446	69.3902		0.991446	105.534		0.991446	118.699		0.991446	109.441		0.991446	115.255		0.991446	71.2263		0.991446	113.907		0.991446	90.4403		0.991446	90.1379		0.991446	128.864		0.991446	129.107		0.991446	105.813		0.991446
	0.992526	93.8653		0.992526	91.9693		1.32337	23.3072		0.992526	93.295		0.992526	69.8971		0.992526	106.389		0.992526	119.748		0.992526	110.091		0.992526	115.937		0.992526	71.9244		0.992526	114.748		0.992526	91.0372		0.992526	90.7419		0.992526	129.932		0.992526	130.141		0.992526	106.561		0.992526
	0.993606	94.5487		0.993606	93.1916		1.32481	23.4872		0.993606	94.1249		0.993606	70.3712		0.993606	107.157		0.993606	120.723		0.993606	110.664		0.993606	116.54		0.993606	72.5717		0.993606	115.542		0.993606	91.5843		0.993606	91.318		0.993606	130.947		0.993606	131.085		0.993606	107.245		0.993606
	0.994686	95.1794		0.994686	94.3306		1.32625	23.6649		0.994686	94.929		0.994686	70.8109		0.994686	107.845		0.994686	121.608		0.994686	111.17		0.994686	117.067		0.994686	73.1688		0.994686	116.287		0.994686	92.0726		0.994686	91.8702		0.994686	131.909		0.994686	131.934		0.994686	107.87		0.994686
	0.995766	95.7567		0.995766	95.3873		1.32769	23.8394		0.995766	95.7007		0.995766	71.2156		0.995766	108.462		0.995766	122.395		0.995766	111.62		0.995766	117.523		0.995766	73.7167		0.995766	116.977		0.995766	92.4964		0.995766	92.3991		0.995766	132.818		0.995766	132.681		0.995766	108.449		0.995766
	0.996846	96.2809		0.996846	96.3619		1.32913	24.01		0.996846	96.4318		0.996846	71.5838		0.996846	109.022		0.996846	123.082		0.996846	112.025		0.996846	117.92		0.996846	74.2173		0.996846	117.611		0.996846	92.8535		0.996846	92.899		0.996846	133.671		0.996846	133.328		0.996846	108.993		0.996846
	0.997926	96.7534		0.997926	97.256		1.33057	24.1762		0.997926	97.1147		0.997926	71.9129		0.997926	109.54		0.997926	123.673		0.997926	112.39		0.997926	118.271		0.997926	74.674		0.997926	118.188		0.997926	93.1452		0.997926	93.3579		0.997926	134.464		0.997926	133.879		0.997926	109.504		0.997926
	0.999006	97.1777		0.999006	98.0734		1.33201	24.3377		0.999006	97.7435		0.999006	72.2005		0.999006	110.033		0.999006	124.17		0.999006	112.72		0.999006	118.591		0.999006	75.0914		0.999006	118.708		0.999006	93.3746		0.999006	93.7612		0.999006	135.19		0.999006	134.343		0.999006	109.982		0.999006
	1.00009	97.5596		1.00009	98.8193		1.33345	24.4943		1.00009	98.3134		1.00009	72.4467		1.00009	110.51		1.00009	124.582		1.00009	113.017		1.00009	118.888		1.00009	75.4742		1.00009	119.168		1.00009	93.5475		1.00009	94.0967		1.00009	135.843		1.00009	134.727		1.00009	110.426		1.00009
	1.00117	97.9074		1.00117	99.4991		1.33489	24.6466		1.00117	98.8198		1.00117	72.6553		1.00117	110.974		1.00117	124.915		1.00117	113.282		1.00117	119.168		1.00117	75.8242		1.00117	119.567		1.00117	93.6729		1.00117	94.3577		1.00117	136.413		1.00117	135.042		1.00117	110.832		1.00117
	1.00225	98.2297		1.00225	100.119		1.33633	24.7952		1.00225	99.2605		1.00225	72.8308		1.00225	111.419		1.00225	125.175		1.00225	113.517		1.00225	119.431		1.00225	76.1408		1.00225	119.898		1.00225	93.7609		1.00225	94.5411		1.00225	136.891		1.00225	135.296		1.00225	111.198		1.00225
	1.00333	98.5323		1.00333	100.687		1.33777	24.9406		1.00333	99.6369		1.00333	72.9767		1.00333	111.837		1.00333	125.365		1.00333	113.721		1.00333	119.671		1.00333	76.4219		1.00333	120.158		1.00333	93.8195		1.00333	94.647		1.00333	137.268		1.00333	135.503		1.00333	111.516		1.00333
	1.00441	98.8171		1.00441	101.213		1.33921	25.0824		1.00441	99.9542		1.00441	73.0957		1.00441	112.213		1.00441	125.482		1.00441	113.888		1.00441	119.882		1.00441	76.6663		1.00441	120.342		1.00441	93.853		1.00441	94.6794		1.00441	137.547		1.00441	135.672		1.00441	111.779		1.00441
	1.00549	99.0823		1.00549	101.708		1.34065	25.2198		1.00549	100.22		1.00549	73.1916		1.00549	112.534		1.00549	125.525		1.00549	114.008		1.00549	120.053		1.00549	76.8749		1.00549	120.446		1.00549	93.8627		1.00549	94.6479		1.00549	137.733		1.00549	135.811		1.00549	111.987		1.00549
	1.00657	99.3216		1.00657	102.176		1.34209	25.352		1.00657	100.442		1.00657	73.2708		1.00657	112.785		1.00657	125.493		1.00657	114.075		1.00657	120.178		1.00657	77.0497		1.00657	120.471		1.00657	93.8489		1.00657	94.5654		1.00657	137.838		1.00657	135.924		1.00657	112.14		1.00657
	1.00765	99.5249		1.00765	102.616		1.34353	25.4784		1.00765	100.627		1.00765	73.3403		1.00765	112.958		1.00765	125.387		1.00765	114.084		1.00765	120.25		1.00765	77.1926		1.00765	120.419		1.00765	93.8118		1.00765	94.444		1.00765	137.871		1.00765	136.012		1.00765	112.242		1.00765
	1.00873	99.6805		1.00873	103.019		1.34497	25.5986		1.00873	100.78		1.00873	73.404		1.00873	113.055		1.00873	125.214		1.00873	114.033		1.00873	120.263		1.00873	77.3054		1.00873	120.301		1.00873	93.7512		1.00873	94.2929		1.00873	137.843		1.00873	136.075		1.00873	112.291		1.00873
	1.00981	99.7792		1.00981	103.373		1.34641	25.7122		1.00981	100.908		1.00981	73.4612		1.00981	113.084		1.00981	124.98		1.00981	113.922		1.00981	120.217		1.00981	77.3903		1.00981	120.13		1.00981	93.6653		1.00981	94.118		1.00981	137.765		1.00981	136.112		1.00981	112.286		1.00981
	1.01089	99.8175		1.01089	103.666		1.34785	25.8186		1.01089	101.017		1.01089	73.5078		1.01089	113.061		1.01089	124.693		1.01089	113.753		1.01089	120.116		1.01089	77.4491		1.01089	119.919		1.01089	93.5517		1.01089	93.924		1.01089	137.648		1.01089	136.119		1.01089	112.224		1.01089
	1.01197	99.7983		1.01197	103.888		1.34929	25.9175		1.01197	101.111		1.01197	73.5383		1.01197	113.003		1.01197	124.361		1.01197	113.535		1.01197	119.967		1.01197	77.4824		1.01197	119.682		1.01197	93.4078		1.01197	93.7132		1.01197	137.499		1.01197	136.086		1.01197	112.106		1.01197
	1.01305	99.7285		1.01305	104.034		1.35073	26.0089		1.01305	101.189		1.01305	73.5475		1.01305	112.928		1.01305	123.991		1.01305	113.28		1.01305	119.776		1.01305	77.4894		1.01305	119.426		1.01305	93.2324		1.01305	93.4834		1.01305	137.318		1.01305	136.003		1.01305	111.935		1.01305
	1.01413	99.6173		1.01413	104.099		1.35217	26.0934		1.01413	101.247		1.01413	73.5296		1.01413	112.849		1.01413	123.591		1.01413	113.004		1.01413	119.55		1.01413	77.4676		1.01413	119.153		1.01413	93.0246		1.01413	93.2291		1.01413	137.101		1.01413	135.86		1.01413	111.713		1.01413
	1.01521	99.4748		1.01521	104.084		1.35361	26.1712		1.01521	101.279		1.01521	73.4767		1.01521	112.772		1.01521	123.166		1.01521	112.722		1.01521	119.296		1.01521	77.4137		1.01521	118.857		1.01521	92.7842		1.01521	92.9451		1.01521	136.843		1.01521	135.653		1.01521	111.446		1.01521
	1.01629	99.3106		1.01629	103.999		1.35505	26.2424		1.01629	101.279		1.01629	73.3802		1.01629	112.697		1.01629	122.717		1.01629	112.44		1.01629	119.018		1.01629	77.3251		1.01629	118.53		1.01629	92.5102		1.01629	92.6286		1.01629	136.541		1.01629	135.382		1.01629	111.141		1.01629
	1.01737	99.1311		1.01737	103.854		1.35649	26.3068		1.01737	101.242		1.01737	73.2333		1.01737	112.615		1.01737	122.246		1.01737	112.159		1.01737	118.722		1.01737	77.1999		1.01737	118.165		1.01737	92.2014		1.01737	92.2801		1.01737	136.191		1.01737	135.052		1.01737	110.807		1.01737
	1.01845	98.938		1.01845	103.662		1.35793	26.364		1.01845	101.165		1.01845	73.0338		1.01845	112.512		1.01845	121.753		1.01845	111.876		1.01845	118.415		1.01845	77.0387		1.01845	117.758		1.01845	91.8572		1.01845	91.9002		1.01845	135.792		1.01845	134.672		1.01845	110.457		1.01845
	1.01953	98.728		1.01953	103.431		1.35937	26.4143		1.01953	101.046		1.01953	72.7841		1.01953	112.376		1.01953	121.24		1.01953	111.581		1.01953	118.099		1.01953	76.8451		1.01953	117.31		1.01953	91.4786		1.01953	91.4891		1.01953	135.34		1.01953	134.25		1.01953	110.097		1.01953
	1.02061	98.4965		1.02061	103.168		1.36081	26.4578		1.02061	100.887		1.02061	72.4892		1.02061	112.197		1.02061	120.711		1.02061	111.262		1.02061	117.774		1.02061	76.6248		1.02061	116.827		1.02061	91.0692		1.02061	91.0474		1.02061	134.831		1.02061	133.799		1.02061	109.734		1.02061
	1.02169	98.2401		1.02169	102.874		1.36225	26.4945		1.02169	100.693		1.02169	72.155		1.02169	111.969		1.02169	120.17		1.02169	110.903		1.02169	117.435		1.02169	76.3857		1.02169	116.317		1.02169	90.6347		1.02169	90.5784		1.02169	134.264		1.02169	133.328		1.02169	109.371		1.02169
	1.02277	97.9581		1.02277	102.551		1.36369	26.5243		1.02277	100.471		1.02277	71.7887		1.02277	111.693		1.02277	119.622		1.02277	110.494		1.02277	117.076		1.02277	76.1351		1.02277	115.788		1.02277	90.1816		1.02277	90.0863		1.02277	133.641		1.02277	132.844		1.02277	109.007		1.02277
	1.02385	97.6519		1.02385	102.194		1.36513	26.5471		1.02385	100.231		1.02385	71.4004		1.02385	111.373		1.02385	119.07		1.02385	110.028		1.02385	116.689		1.02385	75.8786		1.02385	115.245		1.02385	89.7154		1.02385	89.5738		1.02385	132.962		1.02385	132.351		1.02385	108.64		1.02385
	1.02493	97.3244		1.02493	101.802		1.36657	26.5625		1.02493	99.9792		1.02493	71.0026		1.02493	111.017		1.02493	118.513		1.02493	109.501		1.02493	116.271		1.02493	75.6191		1.02493	114.687		1.02493	89.2405		1.02493	89.0409		1.02493	132.231		1.02493	131.843		1.02493	108.262		1.02493
	1.02601	96.9785		1.02601	101.372		1.36801	26.5703		1.02601	99.7227		1.02601	70.6076		1.02601	110.631		1.02601	117.945		1.02601	108.917		1.02601	115.817		1.02601	75.356		1.02601	114.11		1.02601	88.7601		1.02601	88.4852		1.02601	131.45		1.02601	131.314		1.02601	107.865		1.02601
	1.02709	96.6168		1.02709	100.902		1.36945	26.5701		1.02709	99.4633		1.02709	70.2244		1.02709	110.218		1.02709	117.361		1.02709	108.282		1.02709	115.328		1.02709	75.0848		1.02709	113.506		1.02709	88.2759		1.02709	87.9046		1.02709	130.623		1.02709	130.754		1.02709	107.443		1.02709
	1.02817	96.2394		1.02817	100.392		1.37089	26.5617		1.02817	99.2015		1.02817	69.857		1.02817	109.778		1.02817	116.752		1.02817	107.606		1.02817	114.803		1.02817	74.7974		1.02817	112.87		1.02817	87.7879		1.02817	87.2999		1.02817	129.754		1.02817	130.159		1.02817	106.99		1.02817
	1.02925	95.8446		1.02925	99.8458		1.37233	26.545		1.02925	98.9358		1.02925	69.5058		1.02925	109.307		1.02925	116.111		1.02925	106.901		1.02925	114.246		1.02925	74.4827		1.02925	112.198		1.02925	87.2935		1.02925	86.6742		1.02925	128.847		1.02925	129.524		1.02925	106.51		1.02925
	1.03033	95.4291		1.03033	99.265		1.37377	26.52		1.03033	98.6625		1.03033	69.1682		1.03033	108.8		1.03033	115.431		1.03033	106.177		1.03033	113.665		1.03033	74.1291		1.03033	111.49		1.03033	86.7886		1.03033	86.0321		1.03033	127.906		1.03033	128.845		1.03033	106.007		1.03033
	1.03141	94.9899		1.03141	98.6549		1.37521	26.4873		1.03141	98.3768		1.03141	68.8389		1.03141	108.255		1.03141	114.707		1.03141	105.442		1.03141	113.065		1.03141	73.7278		1.03141	110.748		1.03141	86.2695		1.03141	85.3794		1.03141	126.932		1.03141	128.124		1.03141	105.489		1.03141
	1.03249	94.5254		1.03249	98.0211		1.37665	26.4475		1.03249	98.0722		1.03249	68.5096		1.03249	107.674		1.03249	113.939		1.03249	104.701		1.03249	112.453		1.03249	73.2753		1.03249	109.98		1.03249	85.7347		1.03249	84.7219		1.03249	125.929		1.03249	127.365		1.03249	104.966		1.03249
	1.03357	94.0349		1.03357	97.3684		1.37809	26.4015		1.03357	97.7422		1.03357	68.1708		1.03357	107.063		1.03357	113.13		1.03357	103.959		1.03357	111.828		1.03357	72.7739		1.03357	109.194		1.03357	85.1847		1.03357	84.0656		1.03357	124.9		1.03357	126.578		1.03357	104.446		1.03357
	1.03465	93.52		1.03465	96.6994		1.37953	26.35		1.03465	97.3819		1.03465	67.8148		1.03465	106.432		1.03465	112.288		1.03465	103.221		1.03465	111.185		1.03465	72.2316		1.03465	108.398		1.03465	84.6208		1.03465	83.4152		1.03465	123.85		1.03465	125.773		1.03465	103.937		1.03465
	1.03573	92.9853		1.03573	96.0151		1.38097	26.2935		1.03573	96.9883		1.03573	67.4374		1.03573	105.793		1.03573	111.422		1.03573	102.489		1.03573	110.522		1.03573	71.6601		1.03573	107.592		1.03573	84.0441		1.03573	82.7716		1.03573	122.784		1.03573	124.958		1.03573	103.442		1.03573
	1.03681	92.4374		1.03681	95.316		1.38241	26.232		1.03681	96.5612		1.03681	67.0387		1.03681	105.159		1.03681	110.537		1.03681	101.762		1.03681	109.836		1.03681	71.0732		1.03681	106.774		1.03681	83.456		1.03681	82.1319		1.03681	121.709		1.03681	124.14		1.03681	102.955		1.03681
	1.03789	91.8831		1.03789	94.6025		1.38385	26.1648		1.03789	96.1032		1.03789	66.6219		1.03789	104.538		1.03789	109.637		1.03789	101.037		1.03789	109.127		1.03789	70.4855		1.03789	105.94		1.03789	82.8588		1.03789	81.4899		1.03789	120.634		1.03789	123.322		1.03789	102.462		1.03789
	1.03897	91.3269		1.03897	93.8741		1.38529	26.0912		1.03897	95.6176		1.03897	66.193		1.03897	103.932		1.03897	108.727		1.03897	100.314		1.03897	108.395		1.03897	69.9096		1.03897	105.085		1.03897	82.2549		1.03897	80.839		1.03897	119.569		1.03897	122.503		1.03897	101.948		1.03897
	1.04005	90.7699		1.04005	93.1282		1.38673	26.0105		1.04005	95.1089		1.04005	65.7596		1.04005	103.337		1.04005	107.811		1.04005	99.5936		1.04005	107.646		1.04005	69.3541		1.04005	104.209		1.04005	81.6457		1.04005	80.1736		1.04005	118.517		1.04005	121.685		1.04005	101.394		1.04005
	1.04113	90.2108		1.04113	92.3615		1.38817	25.9219		1.04113	94.5827		1.04113	65.3288		1.04113	102.746		1.04113	106.893		1.04113	98.8791		1.04113	106.885		1.04113	68.8218		1.04113	103.312		1.04113	81.0314		1.04113	79.491		1.04113	117.483		1.04113	120.862		1.04113	100.789		1.04113
	1.04221	89.648		1.04221	91.5721		1.38961	25.8255		1.04221	94.0462		1.04221	64.9063		1.04221	102.15		1.04221	105.976		1.04221	98.1717		1.04221	106.12		1.04221	68.3099		1.04221	102.395		1.04221	80.4134		1.04221	78.7909		1.04221	116.463		1.04221	120.028		1.04221	100.124		1.04221
	1.04329	89.0797		1.04329	90.7613		1.39105	25.7214		1.04329	93.5066		1.04329	64.4949		1.04329	101.54		1.04329	105.064		1.04329	97.4734		1.04329	105.358		1.04329	67.8106		1.04329	101.466		1.04329	79.7953		1.04329	78.0752		1.04329	115.456		1.04329	119.181		1.04329	99.4024		1.04329
	1.04437	88.503		1.04437	89.9325		1.39249	25.6107		1.04437	92.9682		1.04437	64.0943		1.04437	100.908		1.04437	104.163		1.04437	96.7871		1.04437	104.603		1.04437	67.3145		1.04437	100.533		1.04437	79.1825		1.04437	77.3476		1.04437	114.459		1.04437	118.317		1.04437	98.631		1.04437
	1.04545	87.914		1.04545	89.0893		1.39393	25.4946		1.04545	92.4316		1.04545	63.7016		1.04545	100.25		1.04545	103.278		1.04545	96.1161		1.04545	103.855		1.04545	66.8131		1.04545	99.6057		1.04545	78.5793		1.04545	76.6126		1.04545	113.466		1.04545	117.434		1.04545	97.8249		1.04545
	1.04653	87.3101		1.04653	88.2346		1.39537	25.3743		1.04653	91.8943		1.04653	63.3128		1.04653	99.5653		1.04653	102.414		1.04653	95.4617		1.04653	103.11		1.04653	66.3009		1.04653	98.6937		1.04653	77.987		1.04653	75.8741		1.04653	112.473		1.04653	116.532		1.04653	97.0018		1.04653
	1.04761	86.6915		1.04761	87.3718		1.39681	25.2516		1.04761	91.3543		1.04761	62.9228		1.04761	98.8561		1.04761	101.575		1.04761	94.8204		1.04761	102.361		1.04761	65.7763		1.04761	97.8035		1.04761	77.4038		1.04761	75.1343		1.04761	111.476		1.04761	115.612		1.04761	96.1793		1.04761
	1.04869	86.062		1.04869	86.5058		1.39825	25.1277		1.04869	90.8105		1.04869	62.5264		1.04869	98.1261		1.04869	100.758		1.04869	94.1835		1.04869	101.606		1.04869	65.241		1.04869	96.9376		1.04869	76.8271		1.04869	74.3929		1.04869	110.472		1.04869	114.677		1.04869	95.3715		1.04869
	1.04977	85.4272		1.04977	85.6414		1.39969	25.0034		1.04977	90.2617		1.04977	62.1177		1.04977	97.3791		1.04977	99.9576		1.04977	93.5405		1.04977	100.838		1.04977	64.6989		1.04977	96.0938		1.04977	76.2539		1.04977	73.6486		1.04977	109.458		1.04977	113.734		1.04977	94.5886		1.04977
	1.05085	84.7928		1.05085	84.7812		1.40113	24.8786		1.05085	89.7066		1.05085	61.6912		1.05085	96.6195		1.05085	99.1649		1.05085	92.8823		1.05085	100.058		1.05085	64.1559		1.05085	95.2656		1.05085	75.6791		1.05085	72.9007		1.05085	108.435		1.05085	112.789		1.05085	93.8351		1.05085
	1.05193	84.1638		1.05193	83.9247		1.40257	24.7525		1.05193	89.1443		1.05193	61.2426		1.05193	95.852		1.05193	98.3715		1.05193	92.2026		1.05193	99.2635		1.05193	63.618		1.05193	94.4439		1.05193	75.095		1.05193	72.1495		1.05193	107.403		1.05193	111.848		1.05193	93.11		1.05193
	1.05301	83.5443		1.05301	83.0706		1.40401	24.6242		1.05301	88.5757		1.05301	60.7711		1.05301	95.0815		1.05301	97.5699		1.05301	91.4979		1.05301	98.4586		1.05301	63.09		1.05301	93.6181		1.05301	74.4922		1.05301	71.3972		1.05301	106.363		1.05301	110.915		1.05301	92.408		1.05301
	1.05409	82.9377		1.05409	82.2186		1.40545	24.493		1.05409	88.005		1.05409	60.279		1.05409	94.3106		1.05409	96.7533		1.05409	90.7674		1.05409	97.6471		1.05409	62.5735		1.05409	92.7771		1.05409	73.8646		1.05409	70.6471		1.05409	105.317		1.05409	109.994		1.05409	91.7213		1.05409
	1.05517	82.345		1.05517	81.3695		1.40689	24.358		1.05517	87.4371		1.05517	59.7709		1.05517	93.5406		1.05517	95.9157		1.05517	90.0142		1.05517	96.8334		1.05517	62.0662		1.05517	91.9101		1.05517	73.2122		1.05517	69.9032		1.05517	104.264		1.05517	109.091		1.05517	91.0425		1.05517
	1.05625	81.764		1.05625	80.5239		1.40833	24.2187		1.05625	86.8762		1.05625	59.2519		1.05625	92.7728		1.05625	95.0546		1.05625	89.2461		1.05625	96.0203		1.05625	61.5623		1.05625	91.0081		1.05625	72.5406		1.05625	69.1693		1.05625	103.205		1.05625	108.204		1.05625	90.3662		1.05625
	1.05733	81.1894		1.05733	79.6792		1.40977	24.0748		1.05733	86.3235		1.05733	58.7278		1.05733	92.0086		1.05733	94.1721		1.05733	88.4738		1.05733	95.2079		1.05733	61.0547		1.05733	90.0675		1.05733	71.8565		1.05733	68.4479		1.05733	102.142		1.05733	107.33		1.05733	89.6883		1.05733
	1.05841	80.6146		1.05841	78.8314		1.41121	23.9265		1.05841	85.777		1.05841	58.2056		1.05841	91.2495		1.05841	93.2742		1.05841	87.707		1.05841	94.3947		1.05841	60.5373		1.05841	89.0917		1.05841	71.1656		1.05841	67.7393		1.05841	101.079		1.05841	106.464		1.05841	89.005		1.05841
	1.05949	80.034		1.05949	77.9781		1.41265	23.7747		1.05949	85.2323		1.05949	57.6932		1.05949	90.495		1.05949	92.368		1.05949	86.9503		1.05949	93.5785		1.05949	60.0061		1.05949	88.0898		1.05949	70.4718		1.05949	67.0408		1.05949	100.015		1.05949	105.598		1.05949	88.3139		1.05949
	1.06057	79.4434		1.06057	77.1199		1.41409	23.6201		1.06057	84.6842		1.06057	57.1962		1.06057	89.7429		1.06057	91.458		1.06057	86.2038		1.06057	92.7566		1.06057	59.4586		1.06057	87.0745		1.06057	69.7801		1.06057	66.347		1.06057	98.9502		1.06057	104.729		1.06057	87.6144		1.06057
	1.06165	78.8401		1.06165	76.2604		1.41553	23.4633		1.06165	84.1282		1.06165	56.7157		1.06165	88.9915		1.06165	90.5454		1.06165	85.4645		1.06165	91.9261		1.06165	58.8948		1.06165	86.0592		1.06165	69.0973		1.06165	65.6514		1.06165	97.8843		1.06165	103.852		1.06165	86.9074		1.06165
	1.06273	78.222		1.06273	75.4044		1.41697	23.3043		1.06273	83.5616		1.06273	56.248		1.06273	88.2418		1.06273	89.6301		1.06273	84.7282		1.06273	91.0847		1.06273	58.3165		1.06273	85.0571		1.06273	68.4284		1.06273	64.9485		1.06273	96.8174		1.06273	102.963		1.06273	86.1949		1.06273
	1.06381	77.5882		1.06381	74.5569		1.41841	23.1429		1.06381	82.9821		1.06381	55.7876		1.06381	87.4958		1.06381	88.7126		1.06381	83.9909		1.06381	90.2318		1.06381	57.7282		1.06381	84.0811		1.06381	67.7745		1.06381	64.2358		1.06381	95.752		1.06381	102.062		1.06381	85.4774		1.06381
	1.06489	76.9396		1.06489	73.7229		1.41985	22.9788		1.06489	82.388		1.06489	55.329		1.06489	86.754		1.06489	87.7939		1.06489	83.2485		1.06489	89.3695		1.06489	57.1361		1.06489	83.1409		1.06489	67.1332		1.06489	63.5153		1.06489	94.6907		1.06489	101.148		1.06489	84.7539		1.06489
	1.06597	76.2781		1.06597	72.908		1.42129	22.8118		1.06597	81.7789		1.06597	54.8679		1.06597	86.0139		1.06597	86.8742		1.06597	82.4976		1.06597	88.5026		1.06597	56.5461		1.06597	82.2411		1.06597	66.5006		1.06597	62.7925		1.06597	93.6356		1.06597	100.223		1.06597	84.0228		1.06597
	1.06705	75.6055		1.06705	72.1162		1.42273	22.6414		1.06705	81.1564		1.06705	54.4005		1.06705	85.271		1.06705	85.9525		1.06705	81.7369		1.06705	87.6367		1.06705	55.9626		1.06705	81.3795		1.06705	65.8749		1.06705	62.0746		1.06705	92.5875		1.06705	99.2922		1.06705	83.2824		1.06705
	1.06813	74.9232		1.06813	71.3479		1.42417	22.4676		1.06813	80.5244		1.06813	53.9237		1.06813	84.5217		1.06813	85.0287		1.06813	80.9671		1.06813	86.7784		1.06813	55.3869		1.06813	80.5494		1.06813	65.2561		1.06813	61.3689		1.06813	91.5468		1.06813	98.3606		1.06813	82.5331		1.06813
	1.06921	74.2322		1.06921	70.5983		1.42561	22.2907		1.06921	79.8864		1.06921	53.4368		1.06921	83.7639		1.06921	84.1059		1.06921	80.1915		1.06921	85.934		1.06921	54.8181		1.06921	79.7419		1.06921	64.6439		1.06921	60.6816		1.06921	90.513		1.06921	97.4327		1.06921	81.7779		1.06921
	1.07029	73.535		1.07029	69.8584		1.42705	22.1114		1.07029	79.2441		1.07029	52.9428		1.07029	82.9964		1.07029	83.1904		1.07029	79.4138		1.07029	85.1087		1.07029	54.254		1.07029	78.9487		1.07029	64.0365		1.07029	60.0169		1.07029	89.4844		1.07029	96.5117		1.07029	81.0214		1.07029
	1.07137	72.8352		1.07137	69.118		1.42849	21.9308		1.07137	78.597		1.07137	52.4468		1.07137	82.2182		1.07137	82.2892		1.07137	78.6379		1.07137	84.3044		1.07137	53.6918		1.07137	78.1613		1.07137	63.4317		1.07137	59.375		1.07137	88.458		1.07137	95.6		1.07137	80.2686		1.07137
	1.07245	72.1376		1.07245	68.3682		1.42993	21.7499		1.07245	77.9454		1.07245	51.9537		1.07245	81.4284		1.07245	81.4064		1.07245	77.8663		1.07245	83.5193		1.07245	53.1292		1.07245	77.3709		1.07245	62.828		1.07245	58.752		1.07245	87.4316		1.07245	94.6987		1.07245	79.5231		1.07245
	1.07353	71.447		1.07353	67.6034		1.43137	21.5696		1.07353	77.2922		1.07353	51.4655		1.07353	80.6278		1.07353	80.5432		1.07353	77.101		1.07353	82.7483		1.07353	52.5637		1.07353	76.5688		1.07353	62.2261		1.07353	58.1401		1.07353	86.4044		1.07353	93.8081		1.07353	78.7866		1.07353
	1.07461	70.768		1.07461	66.8217		1.43281	21.3906		1.07461	76.6417		1.07461	50.9807		1.07461	79.8194		1.07461	79.6994		1.07461	76.3441		1.07461	81.9846		1.07461	51.9939		1.07461	75.7492		1.07461	61.6276		1.07461	57.5309		1.07461	85.3778		1.07461	92.9268		1.07461	78.0596		1.07461
	1.07569	70.1045		1.07569	66.0245		1.43425	21.2131		1.07569	75.998		1.07569	50.4969		1.07569	79.0075		1.07569	78.8752		1.07569	75.598		1.07569	81.2215		1.07569	51.4194		1.07569	74.9096		1.07569	61.0333		1.07569	56.9171		1.07569	84.3559		1.07569	92.0515		1.07569	77.3422		1.07569
	1.07677	69.4598		1.07677	65.216		1.43569	21.0367		1.07677	75.3632		1.07677	50.0114		1.07677	78.1961		1.07677	78.0701		1.07677	74.8648		1.07677	80.4531		1.07677	50.8417		1.07677	74.0513		1.07677	60.4431		1.07677	56.2938		1.07677	83.3448		1.07677	91.1778		1.07677	76.6338		1.07677
	1.07785	68.835		1.07785	64.4019		1.43713	20.8608		1.07785	74.7377		1.07785	49.5224		1.07785	77.3871		1.07785	77.2818		1.07785	74.1456		1.07785	79.6751		1.07785	50.2644		1.07785	73.1778		1.07785	59.856		1.07785	55.6589		1.07785	82.3526		1.07785	90.3016		1.07785	75.9323		1.07785
	1.07893	68.2284		1.07893	63.5877		1.43857	20.6848		1.07893	74.1211		1.07893	49.0283		1.07893	76.5808		1.07893	76.505		1.07893	73.4387		1.07893	78.8863		1.07893	49.6911		1.07893	72.2936		1.07893	59.2707		1.07893	55.013		1.07893	81.387		1.07893	89.4206		1.07893	75.2346		1.07893
	1.08001	67.6353		1.08001	62.7778		1.44001	20.5079		1.08001	73.5115		1.08001	48.5281		1.08001	75.7771		1.08001	75.7339		1.08001	72.7411		1.08001	78.0892		1.08001	49.1254		1.08001	71.4048		1.08001	58.6865		1.08001	54.3601		1.08001	80.4536		1.08001	88.5346		1.08001	74.5386		1.08001
	1.08109	67.0496		1.08109	61.9747		1.44145	20.3296		1.08109	72.9048		1.08109	48.0227		1.08109	74.977		1.08109	74.9643		1.08109	72.0489		1.08109	77.2896		1.08109	48.5694		1.08109	70.5185		1.08109	58.1022		1.08109	53.7062		1.08109	79.5541		1.08109	87.6463		1.08109	73.8456		1.08109
	1.08217	66.4647		1.08217	61.1796		1.44289	20.1495		1.08217	72.2941		1.08217	47.5153		1.08217	74.1835		1.08217	74.1939		1.08217	71.3583		1.08217	76.4938		1.08217	48.0253		1.08217	69.6426		1.08217	57.5163		1.08217	53.0576		1.08217	78.6873		1.08217	86.7601		1.08217	73.1604		1.08217
	1.08325	65.8747		1.08325	60.3936		1.44433	19.9675		1.08325	71.672		1.08325	47.0113		1.08325	73.4011		1.08325	73.4212		1.08325	70.6652		1.08325	75.7065		1.08325	47.4956		1.08325	68.7833		1.08325	56.9273		1.08325	52.4188		1.08325	77.8496		1.08325	85.8817		1.08325	72.4887		1.08325
	1.08433	65.2755		1.08433	59.6182		1.44577	19.7843		1.08433	71.0337		1.08433	46.5162		1.08433	72.6339		1.08433	72.6453		1.08433	69.9659		1.08433	74.9298		1.08433	46.9826		1.08433	67.9445		1.08433	56.3347		1.08433	51.7928		1.08433	77.036		1.08433	85.0175		1.08433	71.8335		1.08433
	1.08541	64.6649		1.08541	58.8562		1.44721	19.6009		1.08541	70.378		1.08541	46.0334		1.08541	71.8853		1.08541	71.8664		1.08541	69.258		1.08541	74.1643		1.08541	46.487		1.08541	67.1269		1.08541	55.7397		1.08541	51.1822		1.08541	76.2402		1.08541	84.1735		1.08541	71.1938		1.08541
	1.08649	64.0433		1.08649	58.1106		1.44865	19.4186		1.08649	69.7072		1.08649	45.5643		1.08649	71.1572		1.08649	71.0867		1.08649	68.5419		1.08649	73.4101		1.08649	46.0072		1.08649	66.3291		1.08649	55.1455		1.08649	50.589		1.08649	75.4547		1.08649	83.3529		1.08649	70.5656		1.08649
	1.08757	63.4139		1.08757	57.3846		1.45009	19.2383		1.08757	69.0254		1.08757	45.1085		1.08757	70.4505		1.08757	70.3099		1.08757	67.8213		1.08757	72.6671		1.08757	45.5403		1.08757	65.5485		1.08757	54.5563		1.08757	50.0133		1.08757	74.673		1.08757	82.5556		1.08757	69.9432		1.08757
	1.08865	62.7817		1.08865	56.6797		1.45153	19.0607		1.08865	68.3383		1.08865	44.6654		1.08865	69.7646		1.08865	69.5391		1.08865	67.1018		1.08865	71.9349		1.08865	45.083		1.08865	64.7816		1.08865	53.9761		1.08865	49.4529		1.08865	73.8905		1.08865	81.7783		1.08865	69.32		1.08865
	1.08973	62.1525		1.08973	55.9953		1.45297	18.8862		1.08973	67.652		1.08973	44.2348		1.08973	69.0961		1.08973	68.7757		1.08973	66.3896		1.08973	71.2132		1.08973	44.6326		1.08973	64.0244		1.08973	53.4082		1.08973	48.904		1.08973	73.1053		1.08973	81.0153		1.08973	68.6884		1.08973
	1.09081	61.532		1.09081	55.3277		1.45441	18.7152		1.09081	66.9716		1.09081	43.8155		1.09081	68.4388		1.09081	68.0184		1.09081	65.6903		1.09081	70.5026		1.09081	44.186		1.09081	63.2736		1.09081	52.855		1.09081	48.3632		1.09081	72.317		1.09081	80.2601		1.09081	68.0415		1.09081
	1.09189	60.925		1.09189	54.6709		1.45585	18.5478		1.09189	66.2995		1.09189	43.4045		1.09189	67.7856		1.09189	67.2648		1.09189	65.0083		1.09189	69.8042		1.09189	43.7394		1.09189	62.527		1.09189	52.3176		1.09189	47.8283		1.09189	71.5262		1.09189	79.5058		1.09189	67.3753		1.09189
	1.09297	60.3354		1.09297	54.0179		1.45729	18.3832		1.09297	65.6343		1.09297	42.9974		1.09297	67.1312		1.09297	66.5123		1.09297	64.3461		1.09297	69.1185		1.09297	43.2891		1.09297	61.7844		1.09297	51.7954		1.09297	47.2971		1.09297	70.7337		1.09297	78.746		1.09297	66.691		1.09297
	1.09405	59.7656		1.09405	53.3627		1.45873	18.2204		1.09405	64.9732		1.09405	42.5896		1.09405	66.4731		1.09405	65.7592		1.09405	63.7032		1.09405	68.4437		1.09405	42.8333		1.09405	61.0472		1.09405	51.2858		1.09405	46.7671		1.09405	69.9417		1.09405	77.9759		1.09405	65.995		1.09405
	1.09513	59.2164		1.09513	52.7019		1.46017	18.0584		1.09513	64.3135		1.09513	42.1779		1.09513	65.8109		1.09513	65.005		1.09513	63.0765		1.09513	67.7752		1.09513	42.3722		1.09513	60.3176		1.09513	50.7845		1.09513	46.2371		1.09513	69.1534		1.09513	77.1933		1.09513	65.2965		1.09513
	1.09621	58.6869		1.09621	52.0348		1.46161	17.8964		1.09621	63.654		1.09621	41.7603		1.09621	65.1447		1.09621	64.2507		1.09621	62.4609		1.09621	67.1071		1.09621	41.9075		1.09621	59.5973		1.09621	50.2868		1.09621	45.7084		1.09621	68.3717		1.09621	76.3984		1.09621	64.6053		1.09621
	1.09729	58.174		1.09729	51.3635		1.46305	17.7343		1.09729	62.9947		1.09729	41.336		1.09729	64.4755		1.09729	63.4997		1.09729	61.8519		1.09729	66.4332		1.09729	41.4408		1.09729	58.8869		1.09729	49.7888		1.09729	45.1849		1.09729	67.5993		1.09729	75.594		1.09729	63.9291		1.09729
	1.09837	57.6727		1.09837	50.692		1.46449	17.5718		1.09837	62.3364		1.09837	40.9045		1.09837	63.8042		1.09837	62.7574		1.09837	61.2458		1.09837	65.7491		1.09837	40.9733		1.09837	58.1868		1.09837	49.2879		1.09837	44.6711		1.09837	66.8384		1.09837	74.7849		1.09837	63.2727		1.09837
	1.09945	57.177		1.09945	50.0252		1.46593	17.409		1.09945	61.6811		1.09945	40.4663		1.09945	63.1322		1.09945	62.0312		1.09945	60.64		1.09945	65.0519		1.09945	40.5057		1.09945	57.4968		1.09945	48.7835		1.09945	44.1695		1.09945	66.0915		1.09945	73.9774		1.09945	62.638		1.09945
	1.10053	56.6811		1.10053	49.3679		1.46737	17.2464		1.10053	61.0317		1.10053	40.0237		1.10053	62.4601		1.10053	61.3277		1.10053	60.0334		1.10053	64.3413		1.10053	40.0394		1.10053	56.8159		1.10053	48.2762		1.10053	43.6807		1.10053	65.3619		1.10053	73.1794		1.10053	62.0239		1.10053
	1.10161	56.1803		1.10161	48.724		1.46881	17.0848		1.10161	60.3912		1.10161	39.5817		1.10161	61.7872		1.10161	60.6506		1.10161	59.4262		1.10161	63.6206		1.10161	39.5761		1.10161	56.1418		1.10161	47.7675		1.10161	43.204		1.10161	64.6522		1.10161	72.3978		1.10161	61.4267		1.10161
	1.10269	55.6714		1.10269	48.0954		1.47025	16.9257		1.10269	59.7609		1.10269	39.1464		1.10269	61.1128		1.10269	59.9986		1.10269	58.8206		1.10269	62.896		1.10269	39.118		1.10269	55.4721		1.10269	47.26		1.10269	42.7383		1.10269	63.9629		1.10269	71.6367		1.10269	60.8408		1.10269
	1.10377	55.1533		1.10377	47.4817		1.47169	16.7702		1.10377	59.1394		1.10377	38.7235		1.10377	60.4374		1.10377	59.3672		1.10377	58.2204		1.10377	62.1762		1.10377	38.6664		1.10377	54.8056		1.10377	46.7564		1.10377	42.2818		1.10377	63.2925		1.10377	70.8974		1.10377	60.26		1.10377
	1.10485	54.6267		1.10485	46.8811		1.47313	16.6192		1.10485	58.524		1.10485	38.3162		1.10485	59.7631		1.10485	58.7494		1.10485	57.6286		1.10485	61.4696		1.10485	38.2224		1.10485	54.1435		1.10485	46.2596		1.10485	41.8314		1.10485	62.6382		1.10485	70.1779		1.10485	59.6784		1.10485
	1.10593	54.0947		1.10593	46.2914		1.47457	16.4729		1.10593	57.9124		1.10593	37.9247		1.10593	59.0926		1.10593	58.1378		1.10593	57.0464		1.10593	60.783		1.10593	37.7868		1.10593	53.4884		1.10593	45.7717		1.10593	41.384		1.10593	61.9971		1.10593	69.4749		1.10593	59.0927		1.10593
	1.10701	53.5627		1.10701	45.7117		1.47601	16.3312		1.10701	57.3037		1.10701	37.547		1.10701	58.4284		1.10701	57.5254		1.10701	56.4725		1.10701	60.1207		1.10701	37.3606		1.10701	52.8431		1.10701	45.293		1.10701	40.9383		1.10701	61.3668		1.10701	68.784		1.10701	58.5021		1.10701
	1.10809	53.0359		1.10809	45.1421		1.47745	16.1934		1.10809	56.6985		1.10809	37.1802		1.10809	57.7727		1.10809	56.9059		1.10809	55.9044		1.10809	59.4853		1.10809	36.9451		1.10809	52.2096		1.10809	44.8232		1.10809	40.4956		1.10809	60.7447		1.10809	68.1011		1.10809	57.9084		1.10809
	1.10917	52.5186		1.10917	44.583		1.47889	16.0584		1.10917	56.0984		1.10917	36.8213		1.10917	57.1273		1.10917	56.2763		1.10917	55.3389		1.10917	58.8777		1.10917	36.5414		1.10917	51.5897		1.10917	44.3616		1.10917	40.0586		1.10917	60.1276		1.10917	67.4232		1.10917	57.3153		1.10917
	1.11025	52.0134		1.11025	44.0339		1.48033	15.9247		1.11025	55.5056		1.11025	36.4677		1.11025	56.4934		1.11025	55.6377		1.11025	54.7726		1.11025	58.2973		1.11025	36.1496		1.11025	50.9857		1.11025	43.9075		1.11025	39.6293		1.11025	59.5128		1.11025	66.7498		1.11025	56.7268		1.11025
	1.11133	51.5209		1.11133	43.494		1.48177	15.7908		1.11133	54.9227		1.11133	36.1165		1.11133	55.8709		1.11133	54.9956		1.11133	54.2024		1.11133	57.7412		1.11133	35.7692		1.11133	50.3987		1.11133	43.4605		1.11133	39.2079		1.11133	58.8997		1.11133	66.0831		1.11133	56.1469		1.11133
	1.11241	51.0403		1.11241	42.9627		1.48321	15.6554		1.11241	54.3528		1.11241	35.7654		1.11241	55.2589		1.11241	54.3577		1.11241	53.6256		1.11241	57.2044		1.11241	35.3995		1.11241	49.8277		1.11241	43.02		1.11241	38.7931		1.11241	58.2894		1.11241	65.4272		1.11241	55.5795		1.11241
	1.11349	50.5698		1.11349	42.4393		1.48465	15.5183		1.11349	53.7981		1.11349	35.4128		1.11349	54.6561		1.11349	53.7314		1.11349	53.0425		1.11349	56.6807		1.11349	35.0398		1.11349	49.2695		1.11349	42.5855		1.11349	38.383		1.11349	57.6841		1.11349	64.7858		1.11349	55.0285		1.11349
	1.11457	50.1068		1.11457	41.9226		1.48609	15.38		1.11457	53.2593		1.11457	35.0591		1.11457	54.0614		1.11457	53.1215		1.11457	52.4568		1.11457	56.1641		1.11457	34.6892		1.11457	48.7199		1.11457	42.1572		1.11457	37.9764		1.11457	57.085		1.11457	64.1607		1.11457	54.4965		1.11457
	1.11565	49.6488		1.11565	41.4102		1.48753	15.2417		1.11565	52.7353		1.11565	34.706		1.11565	53.4749		1.11565	52.5304		1.11565	51.8757		1.11565	55.6487		1.11565	34.3463		1.11565	48.1761		1.11565	41.7355		1.11565	37.5718		1.11565	56.4921		1.11565	63.5505		1.11565	53.9839		1.11565
	1.11673	49.1944		1.11673	40.9001		1.48897	15.105		1.11673	52.2229		1.11673	34.3549		1.11673	52.8974		1.11673	51.9581		1.11673	51.3068		1.11673	55.1296		1.11673	34.0084		1.11673	47.6373		1.11673	41.3204		1.11673	37.1674		1.11673	55.9051		1.11673	62.9517		1.11673	53.4884		1.11673
	1.11781	48.7429		1.11781	40.3918		1.49041	14.971		1.11781	51.7185		1.11781	34.006		1.11781	52.3306		1.11781	51.4035		1.11781	50.7561		1.11781	54.6027		1.11781	33.6728		1.11781	47.1041		1.11781	40.9114		1.11781	36.7624		1.11781	55.3238		1.11781	62.3609		1.11781	53.0063		1.11781
	1.11889	48.294		1.11889	39.8876		1.49185	14.8412		1.11889	51.2187		1.11889	33.6584		1.11889	51.7755		1.11889	50.8642		1.11889	50.2271		1.11889	54.0656		1.11889	33.3371		1.11889	46.5767		1.11889	40.5086		1.11889	36.3572		1.11889	54.7489		1.11889	61.7756		1.11889	52.5339		1.11889
	1.11997	47.8478		1.11997	39.3905		1.49329	14.7164		1.11997	50.7207		1.11997	33.3109		1.11997	51.2327		1.11997	50.3371		1.11997	49.721		1.11997	53.5184		1.11997	33		1.11997	46.0552		1.11997	40.1124		1.11997	35.9546		1.11997	54.1805		1.11997	61.1953		1.11997	52.0685		1.11997
	1.12105	47.4054		1.12105	38.9032		1.49473	14.5971		1.12105	50.2226		1.12105	32.9636		1.12105	50.7008		1.12105	49.819		1.12105	49.2372		1.12105	52.9635		1.12105	32.661		1.12105	45.5402		1.12105	39.724		1.12105	35.5579		1.12105	53.6192		1.12105	60.6214		1.12105	51.6072		1.12105
	1.12213	46.9691		1.12213	38.427		1.49617	14.4824		1.12213	49.7234		1.12213	32.6171		1.12213	50.1784		1.12213	49.3069		1.12213	48.7733		1.12213	52.4056		1.12213	32.3205		1.12213	45.0329		1.12213	39.3439		1.12213	35.1697		1.12213	53.0656		1.12213	60.0568		1.12213	51.1468		1.12213
	1.12321	46.5411		1.12321	37.9626		1.49761	14.3712		1.12321	49.2229		1.12321	32.2729		1.12321	49.6641		1.12321	48.7992		1.12321	48.325		1.12321	51.8504		1.12321	31.9796		1.12321	44.535		1.12321	38.9722		1.12321	34.7903		1.12321	52.521		1.12321	59.5061		1.12321	50.6844		1.12321
	1.12429	46.1231		1.12429	37.5102		1.49905	14.2621		1.12429	48.7219		1.12429	31.9325		1.12429	49.1577		1.12429	48.2953		1.12429	47.8873		1.12429	51.3047		1.12429	31.6404		1.12429	44.0473		1.12429	38.6087		1.12429	34.4186		1.12429	51.9875		1.12429	58.9744		1.12429	50.2192		1.12429
	1.12537	45.7154		1.12537	37.0695		1.50049	14.1544		1.12537	48.2222		1.12537	31.5979		1.12537	48.6598		1.12537	47.7948		1.12537	47.4562		1.12537	50.7745		1.12537	31.3052		1.12537	43.5692		1.12537	38.2536		1.12537	34.0535		1.12537	51.4666		1.12537	58.4647		1.12537	49.7521		1.12537
	1.12645	45.3186		1.12645	36.6392		1.50193	14.0473		1.12645	47.7255		1.12645	31.271		1.12645	48.1707		1.12645	47.2968		1.12645	47.0301		1.12645	50.2647		1.12645	30.9763		1.12645	43.0997		1.12645	37.9071		1.12645	33.6937		1.12645	50.9596		1.12645	57.976		1.12645	49.2847		1.12645
	1.12753	44.9334		1.12753	36.2175		1.50337	13.9405		1.12753	47.2331		1.12753	30.9538		1.12753	47.6913		1.12753	46.8		1.12753	46.6088		1.12753	49.7775		1.12753	30.6555		1.12753	42.6394		1.12753	37.5685		1.12753	33.3383		1.12753	50.4668		1.12753	57.5025		1.12753	48.8183		1.12753
	1.12861	44.5588		1.12861	35.8032		1.50481	13.8339		1.12861	46.7457		1.12861	30.6474		1.12861	47.2229		1.12861	46.3029		1.12861	46.1931		1.12861	49.3128		1.12861	30.3437		1.12861	42.1905		1.12861	37.2358		1.12861	32.9865		1.12861	49.9876		1.12861	57.0354		1.12861	48.3539		1.12861
	1.12969	44.1919		1.12969	35.3959		1.50625	13.7277		1.12969	46.2631		1.12969	30.3521		1.12969	46.7671		1.12969	45.8048		1.12969	45.7829		1.12969	48.8687		1.12969	30.0419		1.12969	41.7557		1.12969	36.9066		1.12969	32.6379		1.12969	49.5207		1.12969	56.5662		1.12969	47.8933		1.12969
	1.13077	43.8286		1.13077	34.9963		1.50769	13.6226		1.13077	45.7845		1.13077	30.0669		1.13077	46.3245		1.13077	45.3065		1.13077	45.3775		1.13077	48.4405		1.13077	29.7502		1.13077	41.335		1.13077	36.5793		1.13077	32.2937		1.13077	49.0652		1.13077	56.0881		1.13077	47.4384		1.13077
	1.13185	43.4655		1.13185	34.6053		1.50913	13.5192		1.13185	45.3096		1.13185	29.7901		1.13185	45.8939		1.13185	44.8098		1.13185	44.9753		1.13185	48.0219		1.13185	29.4683		1.13185	40.926		1.13185	36.2535		1.13185	31.9561		1.13185	48.6205		1.13185	55.5972		1.13185	46.9916		1.13185
	1.13293	43.1008		1.13293	34.2233		1.51057	13.4182		1.13293	44.8387		1.13293	29.5188		1.13293	45.4719		1.13293	44.3178		1.13293	44.5744		1.13293	47.6059		1.13293	29.1952		1.13293	40.5254		1.13293	35.9291		1.13293	31.6278		1.13293	48.186		1.13293	55.0928		1.13293	46.5545		1.13293
	1.13401	42.7342		1.13401	33.8503		1.51201	13.3201		1.13401	44.373		1.13401	29.2502		1.13401	45.054		1.13401	43.8347		1.13401	44.1729		1.13401	47.1859		1.13401	28.929		1.13401	40.13		1.13401	35.606		1.13401	31.3106		1.13401	47.761		1.13401	54.578		1.13401	46.1289		1.13401
	1.13509	42.3659		1.13509	33.4863		1.51345	13.2252		1.13509	43.9142		1.13509	28.9823		1.13509	44.6364		1.13509	43.3648		1.13509	43.7694		1.13509	46.7579		1.13509	28.6679		1.13509	39.7382		1.13509	35.2839		1.13509	31.0054		1.13509	47.344		1.13509	54.0599		1.13509	45.7162		1.13509
	1.13617	41.9969		1.13617	33.1308		1.51489	13.1335		1.13617	43.4641		1.13617	28.7137		1.13617	44.2167		1.13617	42.9122		1.13617	43.3644		1.13617	46.32		1.13617	28.4098		1.13617	39.348		1.13617	34.9628		1.13617	30.7125		1.13617	46.9331		1.13617	53.5479		1.13617	45.3172		1.13617
	1.13725	41.6296		1.13725	32.7831		1.51633	13.0447		1.13725	43.0238		1.13725	28.4438		1.13725	43.7936		1.13725	42.4802		1.13725	42.9598		1.13725	45.872		1.13725	28.1526		1.13725	38.9577		1.13725	34.644		1.13725	30.4321		1.13725	46.5265		1.13725	53.051		1.13725	44.9313		1.13725
	1.13833	41.268		1.13833	32.4425		1.51777	12.9582		1.13833	42.5942		1.13833	28.1725		1.13833	43.3666		1.13833	42.0706		1.13833	42.5582		1.13833	45.4158		1.13833	27.8939		1.13833	38.5669		1.13833	34.3289		1.13833	30.1639		1.13833	46.1234		1.13833	52.5753		1.13833	44.5564		1.13833
	1.13941	40.9161		1.13941	32.108		1.51921	12.8734		1.13941	42.1751		1.13941	27.8995		1.13941	42.9365		1.13941	41.683		1.13941	42.1619		1.13941	44.9549		1.13941	27.6322		1.13941	38.1784		1.13941	34.0189		1.13941	29.9065		1.13941	45.723		1.13941	52.1233		1.13941	44.1904		1.13941
	1.14049	40.5767		1.14049	31.779		1.52065	12.7899		1.14049	41.7651		1.14049	27.6255		1.14049	42.5052		1.14049	41.3155		1.14049	41.7731		1.14049	44.4943		1.14049	27.3668		1.14049	37.7972		1.14049	33.7143		1.14049	29.6569		1.14049	45.3248		1.14049	51.6947		1.14049	43.8305		1.14049
	1.14157	40.2508		1.14157	31.4546		1.52209	12.7074		1.14157	41.3608		1.14157	27.3518		1.14157	42.0758		1.14157	40.9638		1.14157	41.3935		1.14157	44.0395		1.14157	27.0991		1.14157	37.4278		1.14157	33.415		1.14157	29.4121		1.14157	44.9284		1.14157	51.2865		1.14157	43.4732		1.14157
	1.14265	39.9382		1.14265	31.1342		1.52353	12.6258		1.14265	40.9579		1.14265	27.0802		1.14265	41.6515		1.14265	40.6228		1.14265	41.0243		1.14265	43.5947		1.14265	26.8317		1.14265	37.0721		1.14265	33.1211		1.14265	29.1694		1.14265	44.5344		1.14265	50.8936		1.14265	43.1146		1.14265
	1.14373	39.6378		1.14373	30.818		1.52497	12.5452		1.14373	40.5524		1.14373	26.8125		1.14373	41.2345		1.14373	40.2867		1.14373	40.6651		1.14373	43.1634		1.14373	26.5675		1.14373	36.7288		1.14373	32.8326		1.14373	28.9276		1.14373	44.144		1.14373	50.5098		1.14373	42.751		1.14373
	1.14481	39.3484		1.14481	30.5064		1.52641	12.4663		1.14481	40.1425		1.14481	26.5505		1.14481	40.8252		1.14481	39.9504		1.14481	40.3144		1.14481	42.7486		1.14481	26.3089		1.14481	36.3956		1.14481	32.5497		1.14481	28.6852		1.14481	43.7585		1.14481	50.1293		1.14481	42.3807		1.14481
	1.14589	39.0686		1.14589	30.2		1.52785	12.3902		1.14589	39.7289		1.14589	26.2956		1.14589	40.4231		1.14589	39.6099		1.14589	39.9702		1.14589	42.3519		1.14589	26.0577		1.14589	36.0697		1.14589	32.2719		1.14589	28.4411		1.14589	43.3785		1.14589	49.7474		1.14589	42.0043		1.14589
	1.14697	38.7965		1.14697	29.8996		1.52929	12.3182		1.14697	39.3147		1.14697	26.0492		1.14697	40.0265		1.14697	39.2633		1.14697	39.6318		1.14697	41.9734		1.14697	25.8149		1.14697	35.7487		1.14697	31.9984		1.14697	28.1944		1.14697	43.0036		1.14697	49.362		1.14697	41.6234		1.14697
	1.14805	38.5301		1.14805	29.6059		1.53073	12.2505		1.14805	38.9043		1.14805	25.8122		1.14805	39.634		1.14805	38.9101		1.14805	39.2998		1.14805	41.6112		1.14805	25.581		1.14805	35.4294		1.14805	31.7288		1.14805	27.9458		1.14805	42.6339		1.14805	48.9736		1.14805	41.2407		1.14805
	1.14913	38.2675		1.14913	29.3198		1.53217	12.187		1.14913	38.5027		1.14913	25.5848		1.14913	39.2444		1.14913	38.5516		1.14913	38.9751		1.14913	41.262		1.14913	25.3562		1.14913	35.1093		1.14913	31.4626		1.14913	27.6972		1.14913	42.2703		1.14913	48.5844		1.14913	40.8592		1.14913
	1.15021	38.0078		1.15021	29.0417		1.53361	12.1269		1.15021	38.1147		1.15021	25.3665		1.15021	38.8574		1.15021	38.19		1.15021	38.658		1.15021	40.9223		1.15021	25.1393		1.15021	34.7881		1.15021	31.1996		1.15021	27.4513		1.15021	41.9143		1.15021	48.1985		1.15021	40.4826		1.15021
	1.15129	37.7507		1.15129	28.7712		1.53505	12.0694		1.15129	37.7441		1.15129	25.1558		1.15129	38.4741		1.15129	37.828		1.15129	38.3479		1.15129	40.5889		1.15129	24.9286		1.15129	34.4677		1.15129	30.9395		1.15129	27.21		1.15129	41.5673		1.15129	47.8206		1.15129	40.1147		1.15129
	1.15237	37.4966		1.15237	28.507		1.53649	12.0134		1.15237	37.3926		1.15237	24.9507		1.15237	38.0965		1.15237	37.4686		1.15237	38.0446		1.15237	40.2585		1.15237	24.7228		1.15237	34.1514		1.15237	30.6828		1.15237	26.9745		1.15237	41.2299		1.15237	47.455		1.15237	39.7585		1.15237
	1.15345	37.2451		1.15345	28.2473		1.53793	11.9577		1.15345	37.0593		1.15345	24.749		1.15345	37.7278		1.15345	37.1147		1.15345	37.7497		1.15345	39.9284		1.15345	24.5213		1.15345	33.8426		1.15345	30.4309		1.15345	26.7456		1.15345	40.9025		1.15345	47.1047		1.15345	39.4159		1.15345
	1.15453	36.9958		1.15453	27.9904		1.53937	11.901		1.15453	36.7406		1.15453	24.5479		1.15453	37.3722		1.15453	36.7681		1.15453	37.4658		1.15453	39.5971		1.15453	24.3247		1.15453	33.5431		1.15453	30.1852		1.15453	26.5238		1.15453	40.585		1.15453	46.7703		1.15453	39.0876		1.15453
	1.15561	36.7482		1.15561	27.735		1.54081	11.8424		1.15561	36.4319		1.15561	24.3448		1.15561	37.0339		1.15561	36.4307		1.15561	37.195		1.15561	39.2651		1.15561	24.1341		1.15561	33.2533		1.15561	29.9469		1.15561	26.3091		1.15561	40.2766		1.15561	46.4505		1.15561	38.7734		1.15561
	1.15669	36.5028		1.15669	27.48		1.54225	11.7818		1.15669	36.1298		1.15669	24.1382		1.15669	36.7161		1.15669	36.104		1.15669	36.9379		1.15669	38.9345		1.15669	23.95		1.15669	32.9728		1.15669	29.7161		1.15669	26.1009		1.15669	39.9754		1.15669	46.1419		1.15669	38.4724		1.15669
	1.15777	36.2599		1.15777	27.2248		1.54369	11.7197		1.15777	35.8327		1.15777	23.9277		1.15777	36.4197		1.15777	35.7896		1.15777	36.6938		1.15777	38.6078		1.15777	23.7723		1.15777	32.7008		1.15777	29.4928		1.15777	25.8979		1.15777	39.6784		1.15777	45.8403		1.15777	38.1828		1.15777
	1.15885	36.0193		1.15885	26.9692		1.54513	11.6568		1.15885	35.5407		1.15885	23.714		1.15885	36.1427		1.15885	35.4889		1.15885	36.4613		1.15885	38.2876		1.15885	23.6011		1.15885	32.4363		1.15885	29.2767		1.15885	25.6984		1.15885	39.3832		1.15885	45.5415		1.15885	37.9027		1.15885
	1.15993	35.7798		1.15993	26.7144		1.54657	11.5937		1.15993	35.2545		1.15993	23.4993		1.15993	35.8806		1.15993	35.2016		1.15993	36.2388		1.15993	37.9761		1.15993	23.4366		1.15993	32.1786		1.15993	29.0674		1.15993	25.5006		1.15993	39.0888		1.15993	45.2433		1.15993	37.63		1.15993
	1.16101	35.5402		1.16101	26.4616		1.54801	11.5311		1.16101	34.9753		1.16101	23.286		1.16101	35.6281		1.16101	34.9261		1.16101	36.0232		1.16101	37.675		1.16101	23.2788		1.16101	31.9266		1.16101	28.863		1.16101	25.303		1.16101	38.7957		1.16101	44.9455		1.16101	37.3627		1.16101
	1.16209	35.3006		1.16209	26.2124		1.54945	11.4693		1.16209	34.704		1.16209	23.077		1.16209	35.3793		1.16209	34.6592		1.16209	35.8095		1.16209	37.3855		1.16209	23.1271		1.16209	31.6796		1.16209	28.6612		1.16209	25.1051		1.16209	38.5056		1.16209	44.65		1.16209	37.0991		1.16209
	1.16317	35.0621		1.16317	25.9676		1.55089	11.4089		1.16317	34.4407		1.16317	22.8745		1.16317	35.1284		1.16317	34.3977		1.16317	35.592		1.16317	37.1071		1.16317	22.9798		1.16317	31.4368		1.16317	28.4601		1.16317	24.9069		1.16317	38.2199		1.16317	44.3599		1.16317	36.838		1.16317
	1.16425	34.8264		1.16425	25.7284		1.55233	11.3504		1.16425	34.1841		1.16425	22.6803		1.16425	34.8708		1.16425	34.1384		1.16425	35.3663		1.16425	36.838		1.16425	22.8347		1.16425	31.1977		1.16425	28.2588		1.16425	24.7087		1.16425	37.9404		1.16425	44.0786		1.16425	36.5787		1.16425
	1.16533	34.5949		1.16533	25.496		1.55377	11.2941		1.16533	33.9312		1.16533	22.4946		1.16533	34.6038		1.16533	33.8787		1.16533	35.1305		1.16533	36.5753		1.16533	22.6903		1.16533	30.9613		1.16533	28.0574		1.16533	24.5111		1.16533	37.6685		1.16533	43.8085		1.16533	36.3209		1.16533
	1.16641	34.3685		1.16641	25.2716		1.55521	11.2402		1.16641	33.6773		1.16641	22.3169		1.16641	34.3276		1.16641	33.6165		1.16641	34.885		1.16641	36.316		1.16641	22.546		1.16641	30.7271		1.16641	27.8571		1.16641	24.3152		1.16641	37.4049		1.16641	43.5507		1.16641	36.0649		1.16641
	1.16749	34.148		1.16749	25.0563		1.55665	11.1888		1.16749	33.4183		1.16749	22.1455		1.16749	34.0451		1.16749	33.3515		1.16749	34.6317		1.16749	36.0585		1.16749	22.4019		1.16749	30.494		1.16749	27.6591		1.16749	24.1229		1.16749	37.1491		1.16749	43.3039		1.16749	35.8115		1.16749
	1.16857	33.9346		1.16857	24.8509		1.55809	11.1398		1.16857	33.1516		1.16857	21.9788		1.16857	33.7608		1.16857	33.0857		1.16857	34.3729		1.16857	35.8024		1.16857	22.2577		1.16857	30.2613		1.16857	27.4644		1.16857	23.9369		1.16857	36.8998		1.16857	43.0647		1.16857	35.562		1.16857
	1.16965	33.7292		1.16965	24.6561		1.55953	11.0932		1.16965	32.877		1.16965	21.8155		1.16965	33.4795		1.16965	32.8222		1.16965	34.1121		1.16965	35.548		1.16965	22.1137		1.16965	30.0286		1.16965	27.2742		1.16965	23.759		1.16965	36.6562		1.16965	42.8281		1.16965	35.3175		1.16965
	1.17073	33.5319		1.17073	24.4724		1.56097	11.0485		1.17073	32.5966		1.17073	21.6554		1.17073	33.205		1.17073	32.5645		1.17073	33.853		1.17073	35.2955		1.17073	21.9706		1.17073	29.797		1.17073	27.0888		1.17073	23.5898		1.17073	36.4187		1.17073	42.5896		1.17073	35.0788		1.17073
	1.17181	33.3425		1.17181	24.2998		1.56241	11.0053		1.17181	32.3138		1.17181	21.4987		1.17181	32.9403		1.17181	32.315		1.17181	33.599		1.17181	35.0455		1.17181	21.8301		1.17181	29.5685		1.17181	26.9078		1.17181	23.4285		1.17181	36.1888		1.17181	42.3457		1.17181	34.8453		1.17181
	1.17289	33.1605		1.17289	24.1374		1.56385	10.9635		1.17289	32.0324		1.17289	21.3456		1.17289	32.6863		1.17289	32.0748		1.17289	33.352		1.17289	34.7991		1.17289	21.6936		1.17289	29.3465		1.17289	26.7296		1.17289	23.2732		1.17289	35.969		1.17289	42.0957		1.17289	34.6157		1.17289
	1.17397	32.9858		1.17397	23.9827		1.56529	10.9229		1.17397	31.756		1.17397	21.1965		1.17397	32.4426		1.17397	31.8438		1.17397	33.1119		1.17397	34.5573		1.17397	21.5611		1.17397	29.134		1.17397	26.5521		1.17397	23.122		1.17397	35.7616		1.17397	41.8412		1.17397	34.3883		1.17397
	1.17505	32.819		1.17505	23.833		1.56673	10.8838		1.17505	31.4875		1.17505	21.0511		1.17505	32.2075		1.17505	31.6211		1.17505	32.8781		1.17505	34.3201		1.17505	21.4318		1.17505	28.9335		1.17505	26.3733		1.17505	22.9729		1.17505	35.5686		1.17505	41.5858		1.17505	34.1614		1.17505
	1.17613	32.6599		1.17613	23.6851		1.56817	10.8465		1.17613	31.2286		1.17613	20.9092		1.17613	31.9783		1.17613	31.4053		1.17613	32.6502		1.17613	34.0862		1.17613	21.3042		1.17613	28.7458		1.17613	26.1915		1.17613	22.8232		1.17613	35.3912		1.17613	41.3341		1.17613	33.9338		1.17613
	1.17721	32.5067		1.17721	23.5361		1.56961	10.8111		1.17721	30.9793		1.17721	20.7701		1.17721	31.7521		1.17721	31.1948		1.17721	32.4277		1.17721	33.8536		1.17721	21.1772		1.17721	28.5707		1.17721	26.0064		1.17721	22.6701		1.17721	35.2285		1.17721	41.09		1.17721	33.7049		1.17721
	1.17829	32.3564		1.17829	23.3833		1.57105	10.7779		1.17829	30.7385		1.17829	20.6323		1.17829	31.5267		1.17829	30.9879		1.17829	32.2101		1.17829	33.6207		1.17829	21.0499		1.17829	28.4068		1.17829	25.8185		1.17829	22.5118		1.17829	35.077		1.17829	40.8564		1.17829	33.4749		1.17829
	1.17937	32.2051		1.17937	23.2248		1.57249	10.7468		1.17937	30.5041		1.17937	20.494		1.17937	31.3011		1.17937	30.7842		1.17937	31.9967		1.17937	33.3873		1.17937	20.9213		1.17937	28.252		1.17937	25.6294		1.17937	22.3478		1.17937	34.9317		1.17937	40.635		1.17937	33.2449		1.17937
	1.18045	32.0497		1.18045	23.0598		1.57393	10.7176		1.18045	30.2745		1.18045	20.3539		1.18045	31.0753		1.18045	30.5839		1.18045	31.7869		1.18045	33.1542		1.18045	20.7907		1.18045	28.1035		1.18045	25.441		1.18045	22.1796		1.18045	34.7868		1.18045	40.4253		1.18045	33.0174		1.18045
	1.18153	31.8884		1.18153	22.8884		1.57537	10.6899		1.18153	30.049		1.18153	20.2112		1.18153	30.8501		1.18153	30.3879		1.18153	31.5818		1.18153	32.9223		1.18153	20.6577		1.18153	27.9579		1.18153	25.2553		1.18153	22.0096		1.18153	34.6376		1.18153	40.2256		1.18153	32.7952		1.18153
	1.18261	31.7202		1.18261	22.7125		1.57681	10.6632		1.18261	29.8278		1.18261	20.0663		1.18261	30.6268		1.18261	30.1972		1.18261	31.3831		1.18261	32.6925		1.18261	20.5234		1.18261	27.8122		1.18261	25.0731		1.18261	21.8407		1.18261	34.4807		1.18261	40.0331		1.18261	32.5812		1.18261
	1.18369	31.5455		1.18369	22.5344		1.57825	10.637		1.18369	29.6114		1.18369	19.92		1.18369	30.4062		1.18369	30.0122		1.18369	31.1926		1.18369	32.4655		1.18369	20.3896		1.18369	27.6644		1.18369	24.895		1.18369	21.6754		1.18369	34.3142		1.18369	39.8454		1.18369	32.377		1.18369
	1.18477	31.3659		1.18477	22.3564		1.57969	10.6113		1.18477	29.3998		1.18477	19.774		1.18477	30.1892		1.18477	29.8328		1.18477	31.0116		1.18477	32.2419		1.18477	20.2584		1.18477	27.5137		1.18477	24.7208		1.18477	21.5157		1.18477	34.1379		1.18477	39.6619		1.18477	32.1837		1.18477
	1.18585	31.1847		1.18585	22.181		1.58113	10.5862		1.18585	29.1925		1.18585	19.6301		1.18585	29.9761		1.18585	29.6583		1.18585	30.8408		1.18585	32.0226		1.18585	20.1309		1.18585	27.3606		1.18585	24.5504		1.18585	21.363		1.18585	33.9535		1.18585	39.4839		1.18585	32.0013		1.18585
	1.18693	31.0071		1.18693	22.0101		1.58257	10.562		1.18693	28.9885		1.18693	19.4904		1.18693	29.7677		1.18693	29.4872		1.18693	30.6806		1.18693	31.8077		1.18693	20.0081		1.18693	27.2062		1.18693	24.3836		1.18693	21.2178		1.18693	33.7643		1.18693	39.3137		1.18693	31.8293		1.18693
	1.18801	30.8377		1.18801	21.8455		1.58401	10.5389		1.18801	28.7866		1.18801	19.357		1.18801	29.5646		1.18801	29.3181		1.18801	30.531		1.18801	31.597		1.18801	19.8903		1.18801	27.0511		1.18801	24.2199		1.18801	21.08		1.18801	33.5744		1.18801	39.1535		1.18801	31.6663		1.18801
	1.18909	30.6799		1.18909	21.6886		1.58545	10.5167		1.18909	28.585		1.18909	19.2312		1.18909	29.3675		1.18909	29.1493		1.18909	30.3911		1.18909	31.3901		1.18909	19.7779		1.18909	26.8959		1.18909	24.0581		1.18909	20.9488		1.18909	33.3869		1.18909	39.005		1.18909	31.5105		1.18909
	1.19017	30.5344		1.19017	21.54		1.58689	10.4954		1.19017	28.3816		1.19017	19.1138		1.19017	29.1765		1.19017	28.98		1.19017	30.2589		1.19017	31.1871		1.19017	19.6709		1.19017	26.7407		1.19017	23.897		1.19017	20.8226		1.19017	33.2037		1.19017	38.8688		1.19017	31.3601		1.19017
	1.19125	30.4		1.19125	21.3992		1.58833	10.4751		1.19125	28.1746		1.19125	19.0045		1.19125	28.9918		1.19125	28.8093		1.19125	30.1312		1.19125	30.9894		1.19125	19.5685		1.19125	26.5858		1.19125	23.7356		1.19125	20.6995		1.19125	33.0255		1.19125	38.7444		1.19125	31.2128		1.19125
	1.19233	30.2748		1.19233	21.2652		1.58977	10.4553		1.19233	27.9636		1.19233	18.9028		1.19233	28.8132		1.19233	28.6372		1.19233	30.0049		1.19233	30.7988		1.19233	19.469		1.19233	26.4314		1.19233	23.5742		1.19233	20.5782		1.19233	32.853		1.19233	38.6298		1.19233	31.0667		1.19233
	1.19341	30.1571		1.19341	21.1369		1.59121	10.436		1.19341	27.7497		1.19341	18.8071		1.19341	28.6404		1.19341	28.4639		1.19341	29.878		1.19341	30.6166		1.19341	19.3705		1.19341	26.278		1.19341	23.4135		1.19341	20.4578		1.19341	32.6866		1.19341	38.5213		1.19341	30.9197		1.19341
	1.19449	30.0449		1.19449	21.0127		1.59265	10.4171		1.19449	27.5357		1.19449	18.7154		1.19449	28.4727		1.19449	28.2906		1.19449	29.7506		1.19449	30.4426		1.19449	19.2711		1.19449	26.1261		1.19449	23.2547		1.19449	20.3388		1.19449	32.5265		1.19449	38.4143		1.19449	30.7705		1.19449
	1.19557	29.9362		1.19557	20.8908		1.59409	10.399		1.19557	27.3249		1.19557	18.6246		1.19557	28.3092		1.19557	28.1188		1.19557	29.624		1.19557	30.2756		1.19557	19.17		1.19557	25.9764		1.19557	23.0991		1.19557	20.2219		1.19557	32.3727		1.19557	38.304		1.19557	30.6196		1.19557
	1.19665	29.8292		1.19665	20.7693		1.59553	10.3821		1.19665	27.1206		1.19665	18.5321		1.19665	28.1486		1.19665	27.9503		1.19665	29.4995		1.19665	30.114		1.19665	19.0671		1.19665	25.83		1.19665	22.9481		1.19665	20.1074		1.19665	32.226		1.19665	38.1863		1.19665	30.4678		1.19665
	1.19773	29.7224		1.19773	20.6468		1.59697	10.3669		1.19773	26.9253		1.19773	18.4354		1.19773	27.9895		1.19773	27.7865		1.19773	29.3783		1.19773	29.9558		1.19773	18.9622		1.19773	25.688		1.19773	22.8029		1.19773	19.9947		1.19773	32.0876		1.19773	38.0592		1.19773	30.3164		1.19773
	1.19881	29.6155		1.19881	20.5231		1.59841	10.3538		1.19881	26.7405		1.19881	18.3334		1.19881	27.8311		1.19881	27.6278		1.19881	29.2607		1.19881	29.7988		1.19881	18.8559		1.19881	25.5512		1.19881	22.6644		1.19881	19.8831		1.19881	31.9596		1.19881	37.9224		1.19881	30.1664		1.19881
	1.19989	29.5088		1.19989	20.3991		1.59985	10.3432		1.19989	26.5664		1.19989	18.2258		1.19989	27.6732		1.19989	27.4738		1.19989	29.1472		1.19989	29.6401		1.19989	18.7496		1.19989	25.4197		1.19989	22.5328		1.19989	19.7721		1.19989	31.8432		1.19989	37.7779		1.19989	30.0189		1.19989
	1.20097	29.4021		1.20097	20.2762		1.60129	10.3353		1.20097	26.4015		1.20097	18.113		1.20097	27.5161		1.20097	27.3237		1.20097	29.038		1.20097	29.4775		1.20097	18.6461		1.20097	25.2925		1.20097	22.4067		1.20097	19.6623		1.20097	31.7384		1.20097	37.6295		1.20097	29.8757		1.20097
	1.20205	29.2949		1.20205	20.1558		1.60273	10.3301		1.20205	26.2428		1.20205	17.9962		1.20205	27.36		1.20205	27.1763		1.20205	28.9319		1.20205	29.3105		1.20205	18.5481		1.20205	25.1678		1.20205	22.2839		1.20205	19.5545		1.20205	31.644		1.20205	37.4813		1.20205	29.7389		1.20205
	1.20313	29.1859		1.20313	20.0392		1.60417	10.3271		1.20313	26.0867		1.20313	17.8772		1.20313	27.2052		1.20313	27.0306		1.20313	28.8264		1.20313	29.1405		1.20313	18.4577		1.20313	25.0432		1.20313	22.1612		1.20313	19.4492		1.20313	31.5583		1.20313	37.3377		1.20313	29.6097		1.20313
	1.20421	29.0739		1.20421	19.9276		1.60561	10.3255		1.20421	25.9302		1.20421	17.7579		1.20421	27.0518		1.20421	26.8857		1.20421	28.7185		1.20421	28.9699		1.20421	18.3756		1.20421	24.9168		1.20421	22.0359		1.20421	19.3463		1.20421	31.4787		1.20421	37.2025		1.20421	29.4878		1.20421
	1.20529	28.9587		1.20529	19.8216		1.60705	10.3242		1.20529	25.7712		1.20529	17.6402		1.20529	26.8994		1.20529	26.7414		1.20529	28.606		1.20529	28.8012		1.20529	18.3014		1.20529	24.7871		1.20529	21.9063		1.20529	19.246		1.20529	31.4022		1.20529	37.0793		1.20529	29.3722		1.20529
	1.20637	28.8406		1.20637	19.721		1.60849	10.3219		1.20637	25.6091		1.20637	17.525		1.20637	26.7475		1.20637	26.5984		1.20637	28.4884		1.20637	28.6365		1.20637	18.2339		1.20637	24.6535		1.20637	21.7721		1.20637	19.1488		1.20637	31.3254		1.20637	36.9699		1.20637	29.2617		1.20637
	1.20745	28.7205		1.20745	19.6247		1.60993	10.3178		1.20745	25.4447		1.20745	17.4125		1.20745	26.5955		1.20745	26.4582		1.20745	28.3669		1.20745	28.4781		1.20745	18.171		1.20745	24.5164		1.20745	21.6347		1.20745	19.0549		1.20745	31.2453		1.20745	36.8748		1.20745	29.1554		1.20745
	1.20853	28.5994		1.20853	19.5309		1.61137	10.3113		1.20853	25.28		1.20853	17.3025		1.20853	26.4435		1.20853	26.3224		1.20853	28.2431		1.20853	28.3281		1.20853	18.1098		1.20853	24.3776		1.20853	21.4959		1.20853	18.9632		1.20853	31.1605		1.20853	36.7923		1.20853	29.0522		1.20853
	1.20961	28.4787		1.20961	19.4383		1.61281	10.302		1.20961	25.1174		1.20961	17.1949		1.20961	26.2928		1.20961	26.1925		1.20961	28.1188		1.20961	28.1876		1.20961	18.0471		1.20961	24.2392		1.20961	21.3579		1.20961	18.8714		1.20961	31.0709		1.20961	36.7196		1.20961	28.9505		1.20961
	1.21069	28.3606		1.21069	19.3466		1.61425	10.2903		1.21069	24.9596		1.21069	17.09		1.21069	26.1453		1.21069	26.0693		1.21069	27.9961		1.21069	28.0557		1.21069	17.9802		1.21069	24.1038		1.21069	21.2225		1.21069	18.7766		1.21069	30.9777		1.21069	36.6536		1.21069	28.8494		1.21069
	1.21177	28.2476		1.21177	19.2561		1.61569	10.2767		1.21177	24.8084		1.21177	16.9878		1.21177	26.0035		1.21177	25.9526		1.21177	27.8773		1.21177	27.93		1.21177	17.9077		1.21177	23.9736		1.21177	21.091		1.21177	18.6765		1.21177	30.8833		1.21177	36.5917		1.21177	28.7483		1.21177
	1.21285	28.1429		1.21285	19.1674		1.61713	10.2627		1.21285	24.6653		1.21285	16.8881		1.21285	25.8695		1.21285	25.8413		1.21285	27.7654		1.21285	27.8071		1.21285	17.8298		1.21285	23.8506		1.21285	20.9636		1.21285	18.5703		1.21285	30.7903		1.21285	36.532		1.21285	28.6473		1.21285
	1.21393	28.0494		1.21393	19.0807		1.61857	10.25		1.21393	24.531		1.21393	16.7908		1.21393	25.7447		1.21393	25.7338		1.21393	27.6619		1.21393	27.684		1.21393	17.7476		1.21393	23.7357		1.21393	20.8394		1.21393	18.4586		1.21393	30.7017		1.21393	36.4727		1.21393	28.547		1.21393
	1.21501	27.9687		1.21501	18.9959		1.62001	10.2403		1.21501	24.4053		1.21501	16.6956		1.21501	25.6305		1.21501	25.6279		1.21501	27.567		1.21501	27.5586		1.21501	17.6632		1.21501	23.6293		1.21501	20.7173		1.21501	18.3431		1.21501	30.6202		1.21501	36.4127		1.21501	28.4479		1.21501
	1.21609	27.9013		1.21609	18.9126		1.62145	10.2347		1.21609	24.2873		1.21609	16.6024		1.21609	25.5267		1.21609	25.5217		1.21609	27.4793		1.21609	27.4291		1.21609	17.5789		1.21609	23.5311		1.21609	20.596		1.21609	18.2263		1.21609	30.5481		1.21609	36.3517		1.21609	28.3511		1.21609
	1.21717	27.8461		1.21717	18.8302		1.62289	10.2335		1.21717	24.1751		1.21717	16.511		1.21717	25.4317		1.21717	25.414		1.21717	27.3969		1.21717	27.2944		1.21717	17.4972		1.21717	23.4401		1.21717	20.4759		1.21717	18.1106		1.21717	30.4874		1.21717	36.2906		1.21717	28.2576		1.21717
	1.21825	27.8013		1.21825	18.7474		1.62433	10.2362		1.21825	24.0662		1.21825	16.4208		1.21825	25.3421		1.21825	25.3042		1.21825	27.3178		1.21825	27.1545		1.21825	17.4197		1.21825	23.3555		1.21825	20.3587		1.21825	17.9986		1.21825	30.4391		1.21825	36.2311		1.21825	28.168		1.21825
	1.21933	27.7646		1.21933	18.663		1.62577	10.2417		1.21933	23.9581		1.21933	16.3315		1.21933	25.2537		1.21933	25.192		1.21933	27.2403		1.21933	27.011		1.21933	17.3469		1.21933	23.2762		1.21933	20.2467		1.21933	17.892		1.21933	30.4029		1.21933	36.1754		1.21933	28.0825		1.21933
	1.22041	27.7335		1.22041	18.5761		1.62721	10.249		1.22041	23.8489		1.22041	16.2427		1.22041	25.1627		1.22041	25.0779		1.22041	27.1623		1.22041	26.8665		1.22041	17.278		1.22041	23.2012		1.22041	20.1422		1.22041	17.792		1.22041	30.3765		1.22041	36.1253		1.22041	28.0004		1.22041
	1.22149	27.7051		1.22149	18.486		1.62865	10.2564		1.22149	23.7368		1.22149	16.1548		1.22149	25.0668		1.22149	24.9628		1.22149	27.0822		1.22149	26.7239		1.22149	17.2115		1.22149	23.129		1.22149	20.0465		1.22149	17.6989		1.22149	30.3561		1.22149	36.0823		1.22149	27.9211		1.22149
	1.22257	27.6768		1.22257	18.3932		1.63009	10.263		1.22257	23.6208		1.22257	16.0683		1.22257	24.9653		1.22257	24.8486		1.22257	26.999		1.22257	26.5857		1.22257	17.1461		1.22257	23.0581		1.22257	19.9596		1.22257	17.6122		1.22257	30.338		1.22257	36.0466		1.22257	27.8435		1.22257
	1.22365	27.6462		1.22365	18.2983		1.63153	10.2679		1.22365	23.5006		1.22365	15.9836		1.22365	24.8584		1.22365	24.7367		1.22365	26.9137		1.22365	26.4535		1.22365	17.0807		1.22365	22.9871		1.22365	19.8802		1.22365	17.5311		1.22365	30.319		1.22365	36.0176		1.22365	27.7661		1.22365
	1.22473	27.612		1.22473	18.2028		1.63297	10.2713		1.22473	23.377		1.22473	15.9006		1.22473	24.7474		1.22473	24.6285		1.22473	26.8284		1.22473	26.3284		1.22473	17.0146		1.22473	22.9152		1.22473	19.8058		1.22473	17.4541		1.22473	30.2966		1.22473	35.9942		1.22473	27.6876		1.22473
	1.22581	27.574		1.22581	18.1085		1.63441	10.2735		1.22581	23.2519		1.22581	15.8188		1.22581	24.6346		1.22581	24.5246		1.22581	26.7457		1.22581	26.2115		1.22581	16.948		1.22581	22.8418		1.22581	19.7334		1.22581	17.3804		1.22581	30.2689		1.22581	35.975		1.22581	27.6069		1.22581
	1.22689	27.5326		1.22689	18.0171		1.63585	10.2755		1.22689	23.1282		1.22689	15.738		1.22689	24.5235		1.22689	24.425		1.22689	26.6675		1.22689	26.1026		1.22689	16.8814		1.22689	22.7671		1.22689	19.6596		1.22689	17.3095		1.22689	30.2347		1.22689	35.9587		1.22689	27.5242		1.22689
	1.22797	27.4886		1.22797	17.9296		1.63729	10.2781		1.22797	23.0085		1.22797	15.6576		1.22797	24.4177		1.22797	24.3295		1.22797	26.5958		1.22797	26.0007		1.22797	16.816		1.22797	22.692		1.22797	19.5818		1.22797	17.2409		1.22797	30.1949		1.22797	35.9439		1.22797	27.441		1.22797
	1.22905	27.4434		1.22905	17.8463		1.63873	10.2819		1.22905	22.8947		1.22905	15.5774		1.22905	24.32		1.22905	24.2372		1.22905	26.5318		1.22905	25.9043		1.22905	16.7528		1.22905	22.6185		1.22905	19.4989		1.22905	17.1739		1.22905	30.1532		1.22905	35.9302		1.22905	27.36		1.22905
	1.23013	27.3987		1.23013	17.7668		1.64017	10.2871		1.23013	22.7877		1.23013	15.4969		1.23013	24.2319		1.23013	24.1468		1.23013	26.4765		1.23013	25.8118		1.23013	16.6924		1.23013	22.5482		1.23013	19.4111		1.23013	17.1072		1.23013	30.1142		1.23013	35.9189		1.23013	27.2843		1.23013
	1.23121	27.3562		1.23121	17.6906		1.64161	10.2932		1.23121	22.6877		1.23121	15.4162		1.23121	24.1528		1.23121	24.0571		1.23121	26.4297		1.23121	25.7219		1.23121	16.6348		1.23121	22.4825		1.23121	19.3201		1.23121	17.0388		1.23121	30.0827		1.23121	35.9128		1.23121	27.217		1.23121
	1.23229	27.3177		1.23229	17.6167		1.64305	10.2997		1.23229	22.5942		1.23229	15.3363		1.23229	24.0812		1.23229	23.9675		1.23229	26.3906		1.23229	25.6336		1.23229	16.5793		1.23229	22.422		1.23229	19.2284		1.23229	16.9668		1.23229	30.0614		1.23229	35.9159		1.23229	27.1601		1.23229
	1.23337	27.2849		1.23337	17.5444		1.64449	10.3062		1.23337	22.5062		1.23337	15.2585		1.23337	24.0148		1.23337	23.8778		1.23337	26.3577		1.23337	25.5459		1.23337	16.525		1.23337	22.3668		1.23337	19.1381		1.23337	16.8898		1.23337	30.0516		1.23337	35.9316		1.23337	27.1143		1.23337
	1.23445	27.259		1.23445	17.4724		1.64593	10.3129		1.23445	22.4222		1.23445	15.1845		1.23445	23.9509		1.23445	23.7891		1.23445	26.33		1.23445	25.4582		1.23445	16.4708		1.23445	22.3166		1.23445	19.0503		1.23445	16.8076		1.23445	30.0535		1.23445	35.9617		1.23445	27.0788		1.23445
	1.23553	27.2407		1.23553	17.4001		1.64737	10.3202		1.23553	22.3404		1.23553	15.1149		1.23553	23.8868		1.23553	23.7029		1.23553	26.3071		1.23553	25.3708		1.23553	16.4157		1.23553	22.2704		1.23553	18.9652		1.23553	16.7206		1.23553	30.0659		1.23553	36.0066		1.23553	27.0513		1.23553
	1.23661	27.2295		1.23661	17.3266		1.64881	10.3288		1.23661	22.2596		1.23661	15.0496		1.23661	23.8204		1.23661	23.6213		1.23661	26.2889		1.23661	25.2845		1.23661	16.3592		1.23661	22.2264		1.23661	18.8822		1.23661	16.6298		1.23661	30.0867		1.23661	36.0651		1.23661	27.0291		1.23661
	1.23769	27.2246		1.23769	17.2519		1.65025	10.3394		1.23769	22.1791		1.23769	14.9877		1.23769	23.7506		1.23769	23.5462		1.23769	26.275		1.23769	25.2006		1.23769	16.3016		1.23769	22.182		1.23769	18.8003		1.23769	16.5369		1.23769	30.113		1.23769	36.1352		1.23769	27.0086		1.23769
	1.23877	27.2248		1.23877	17.1762		1.65169	10.353		1.23877	22.0993		1.23877	14.9278		1.23877	23.6779		1.23877	23.4787		1.23877	26.265		1.23877	25.1201		1.23877	16.2435		1.23877	22.1352		1.23877	18.7183		1.23877	16.4438		1.23877	30.1424		1.23877	36.2144		1.23877	26.9872		1.23877
	1.23985	27.2299		1.23985	17.0996		1.65313	10.3704		1.23985	22.0203		1.23985	14.8687		1.23985	23.6041		1.23985	23.4192		1.23985	26.2581		1.23985	25.0434		1.23985	16.1861		1.23985	22.0849		1.23985	18.6349		1.23985	16.353		1.23985	30.1735		1.23985	36.2995		1.23985	26.9627		1.23985
	1.24093	27.2402		1.24093	17.0217		1.65457	10.3921		1.24093	21.942		1.24093	14.8091		1.24093	23.5318		1.24093	23.3669		1.24093	26.2538		1.24093	24.9707		1.24093	16.1303		1.24093	22.0314		1.24093	18.5494		1.24093	16.2667		1.24093	30.2067		1.24093	36.3877		1.24093	26.9345		1.24093
	1.24201	27.2558		1.24201	16.9421		1.65601	10.4178		1.24201	21.8646		1.24201	14.7478		1.24201	23.4639		1.24201	23.3205		1.24201	26.2517		1.24201	24.9019		1.24201	16.0769		1.24201	21.9754		1.24201	18.4613		1.24201	16.1861		1.24201	30.244		1.24201	36.4775		1.24201	26.9036		1.24201
	1.24309	27.2767		1.24309	16.8599		1.65745	10.4469		1.24309	21.7881		1.24309	14.6847		1.24309	23.4028		1.24309	23.2782		1.24309	26.2511		1.24309	24.8366		1.24309	16.0268		1.24309	21.918		1.24309	18.3707		1.24309	16.1108		1.24309	30.2879		1.24309	36.5692		1.24309	26.8716		1.24309
	1.24417	27.3026		1.24417	16.7747		1.65889	10.4784		1.24417	21.7127		1.24417	14.6201		1.24417	23.3507		1.24417	23.2378		1.24417	26.2514		1.24417	24.7745		1.24417	15.9803		1.24417	21.8602		1.24417	18.2784		1.24417	16.0399		1.24417	30.3409		1.24417	36.6643		1.24417	26.841		1.24417
	1.24525	27.3331		1.24525	16.6866		1.66033	10.5115		1.24525	21.6388		1.24525	14.5549		1.24525	23.3087		1.24525	23.1975		1.24525	26.252		1.24525	24.715		1.24525	15.9375		1.24525	21.8038		1.24525	18.1853		1.24525	15.972		1.24525	30.4048		1.24525	36.7651		1.24525	26.814		1.24525
	1.24633	27.368		1.24633	16.5962		1.66177	10.5457		1.24633	21.5668		1.24633	14.4903		1.24633	23.2766		1.24633	23.1564		1.24633	26.2531		1.24633	24.6578		1.24633	15.8979		1.24633	21.7509		1.24633	18.0922		1.24633	15.9064		1.24633	30.4802		1.24633	36.8738		1.24633	26.7927		1.24633
	1.24741	27.406		1.24741	16.5044		1.66321	10.5809		1.24741	21.4973		1.24741	14.4271		1.24741	23.2531		1.24741	23.1142		1.24741	26.2554		1.24741	24.6032		1.24741	15.8607		1.24741	21.7034		1.24741	17.9994		1.24741	15.8427		1.24741	30.5668		1.24741	36.9919		1.24741	26.7785		1.24741
	1.24849	27.4455		1.24849	16.4124		1.66465	10.617		1.24849	21.4312		1.24849	14.3662		1.24849	23.2362		1.24849	23.0715		1.24849	26.2599		1.24849	24.5518		1.24849	15.8249		1.24849	21.662		1.24849	17.9071		1.24849	15.7803		1.24849	30.6631		1.24849	37.1203		1.24849	26.7724		1.24849
	1.24957	27.4853		1.24957	16.3219		1.66609	10.6539		1.24957	21.3697		1.24957	14.3079		1.24957	23.2238		1.24957	23.0293		1.24957	26.2677		1.24957	24.5048		1.24957	15.7894		1.24957	21.6261		1.24957	17.8156		1.24957	15.7191		1.24957	30.7673		1.24957	37.2593		1.24957	26.7745		1.24957
	1.25065	27.525		1.25065	16.2351		1.66753	10.6916		1.25065	21.3138		1.25065	14.2526		1.25065	23.214		1.25065	22.9886		1.25065	26.2795		1.25065	24.4629		1.25065	15.7534		1.25065	21.5941		1.25065	17.7262		1.25065	15.6591		1.25065	30.8772		1.25065	37.4085		1.25065	26.7848		1.25065
	1.25173	27.5657		1.25173	16.1537		1.66897	10.7302		1.25173	21.2637		1.25173	14.2002		1.25173	23.2051		1.25173	22.9504		1.25173	26.2961		1.25173	24.4263		1.25173	15.7163		1.25173	21.5643		1.25173	17.6403		1.25173	15.6008		1.25173	30.9907		1.25173	37.5667		1.25173	26.803		1.25173
	1.25281	27.6091		1.25281	16.0789		1.67041	10.77		1.25281	21.2187		1.25281	14.1504		1.25281	23.1956		1.25281	22.9159		1.25281	26.3182		1.25281	24.3945		1.25281	15.6776		1.25281	21.5356		1.25281	17.5589		1.25281	15.5441		1.25281	31.1073		1.25281	37.7323		1.25281	26.8285		1.25281
	1.25389	27.6578		1.25389	16.0109		1.67185	10.8113		1.25389	21.1777		1.25389	14.1031		1.25389	23.1849		1.25389	22.8863		1.25389	26.3464		1.25389	24.3664		1.25389	15.6371		1.25389	21.5069		1.25389	17.4822		1.25389	15.4885		1.25389	31.2273		1.25389	37.9041		1.25389	26.8601		1.25389
	1.25497	27.7138		1.25497	15.9487		1.67329	10.8545		1.25497	21.1392		1.25497	14.0583		1.25497	23.1731		1.25497	22.8618		1.25497	26.3812		1.25497	24.3411		1.25497	15.5953		1.25497	21.4775		1.25497	17.41		1.25497	15.4328		1.25497	31.3525		1.25497	38.0814		1.25497	26.8968		1.25497
	1.25605	27.7794		1.25605	15.891		1.67473	10.9001		1.25605	21.1016		1.25605	14.0157		1.25605	23.161		1.25605	22.8425		1.25605	26.4234		1.25605	24.3178		1.25605	15.553		1.25605	21.447		1.25605	17.3422		1.25605	15.3757		1.25605	31.4847		1.25605	38.2649		1.25605	26.938		1.25605
	1.25713	27.8565		1.25713	15.8361		1.67617	10.9481		1.25713	21.0636		1.25713	13.9744		1.25713	23.1494		1.25713	22.8282		1.25713	26.474		1.25713	24.2965		1.25713	15.5113		1.25713	21.4158		1.25713	17.2788		1.25713	15.3163		1.25713	31.6254		1.25713	38.4564		1.25713	26.9837		1.25713
	1.25821	27.9464		1.25821	15.7824		1.67761	10.9989		1.25821	21.0236		1.25821	13.9331		1.25821	23.139		1.25821	22.8184		1.25821	26.5336		1.25821	24.2768		1.25821	15.4716		1.25821	21.3858		1.25821	17.2188		1.25821	15.2542		1.25821	31.7758		1.25821	38.6591		1.25821	27.0343		1.25821
	1.25929	28.0492		1.25929	15.7284		1.67905	11.0526		1.25929	20.9806		1.25929	13.8908		1.25929	23.131		1.25929	22.8127		1.25929	26.6024		1.25929	24.2594		1.25929	15.4352		1.25929	21.3596		1.25929	17.1609		1.25929	15.1894		1.25929	31.9373		1.25929	38.8767		1.25929	27.0903		1.25929
	1.26037	28.1641		1.26037	15.6729		1.68049	11.1092		1.26037	20.9349		1.26037	13.8467		1.26037	23.1275		1.26037	22.8104		1.26037	26.6798		1.26037	24.2448		1.26037	15.4032		1.26037	21.3394		1.26037	17.1032		1.26037	15.1226		1.26037	32.1112		1.26037	39.1125		1.26037	27.1522		1.26037
	1.26145	28.29		1.26145	15.6155		1.68193	11.1678		1.26145	20.8878		1.26145	13.8009		1.26145	23.1306		1.26145	22.8112		1.26145	26.7651		1.26145	24.2342		1.26145	15.3761		1.26145	21.3266		1.26145	17.0448		1.26145	15.0548		1.26145	32.2981		1.26145	39.3687		1.26145	27.2208		1.26145
	1.26253	28.4252		1.26253	15.5563		1.68337	11.2273		1.26253	20.8415		1.26253	13.7531		1.26253	23.1421		1.26253	22.8145		1.26253	26.8576		1.26253	24.229		1.26253	15.3536		1.26253	21.3218		1.26253	16.9856		1.26253	14.9876		1.26253	32.4983		1.26253	39.6465		1.26253	27.2971		1.26253
	1.26361	28.5684		1.26361	15.4959		1.68481	11.2866		1.26361	20.7983		1.26361	13.7034		1.26361	23.1626		1.26361	22.8204		1.26361	26.9565		1.26361	24.2301		1.26361	15.3352		1.26361	21.3246		1.26361	16.9262		1.26361	14.9225		1.26361	32.7116		1.26361	39.9454		1.26361	27.3823		1.26361
	1.26469	28.7181		1.26469	15.4349		1.68625	11.3454		1.26469	20.7602		1.26469	13.6517		1.26469	23.1923		1.26469	22.8288		1.26469	27.0607		1.26469	24.238		1.26469	15.3199		1.26469	21.3347		1.26469	16.8671		1.26469	14.8607		1.26469	32.9379		1.26469	40.2634		1.26469	27.4771		1.26469
	1.26577	28.8726		1.26577	15.374		1.68769	11.4034		1.26577	20.729		1.26577	13.5988		1.26577	23.2313		1.26577	22.8402		1.26577	27.1692		1.26577	24.2522		1.26577	15.3066		1.26577	21.351		1.26577	16.8092		1.26577	14.802		1.26577	33.1777		1.26577	40.597		1.26577	27.5812		1.26577
	1.26685	29.0307		1.26685	15.3138		1.68913	11.4611		1.26685	20.7055		1.26685	13.5456		1.26685	23.2795		1.26685	22.8552		1.26685	27.2816		1.26685	24.2718		1.26685	15.2945		1.26685	21.3721		1.26685	16.7533		1.26685	14.7461		1.26685	33.4313		1.26685	40.9423		1.26685	27.6943		1.26685
	1.26793	29.1917		1.26793	15.2543		1.69057	11.5189		1.26793	20.6898		1.26793	13.493		1.26793	23.3364		1.26793	22.8747		1.26793	27.3978		1.26793	24.2962		1.26793	15.2828		1.26793	21.3961		1.26793	16.6999		1.26793	14.6922		1.26793	33.6986		1.26793	41.2956		1.26793	27.8152		1.26793
	1.26901	29.3559		1.26901	15.1956		1.69201	11.5778		1.26901	20.6814		1.26901	13.4408		1.26901	23.4005		1.26901	22.8989		1.26901	27.5179		1.26901	24.3248		1.26901	15.2713		1.26901	21.4218		1.26901	16.6495		1.26901	14.6397		1.26901	33.9786		1.26901	41.6553		1.26901	27.943		1.26901
	1.27009	29.5244		1.27009	15.1378		1.69345	11.6389		1.27009	20.6789		1.27009	13.3886		1.27009	23.4698		1.27009	22.9276		1.27009	27.642		1.27009	24.3572		1.27009	15.2603		1.27009	21.4487		1.27009	16.6016		1.27009	14.5884		1.27009	34.2696		1.27009	42.0216		1.27009	28.0765		1.27009
	1.27117	29.6987		1.27117	15.0808		1.69489	11.7031		1.27117	20.681		1.27117	13.3361		1.27117	23.5427		1.27117	22.9601		1.27117	27.7698		1.27117	24.3931		1.27117	15.2508		1.27117	21.477		1.27117	16.5557		1.27117	14.5381		1.27117	34.5702		1.27117	42.3956		1.27117	28.2148		1.27117
	1.27225	29.8798		1.27225	15.025		1.69633	11.7709		1.27225	20.686		1.27225	13.2837		1.27225	23.6185		1.27225	22.9957		1.27225	27.9006		1.27225	24.4323		1.27225	15.2438		1.27225	21.5069		1.27225	16.5111		1.27225	14.4889		1.27225	34.8794		1.27225	42.7789		1.27225	28.3571		1.27225
	1.27333	30.0688		1.27333	14.9709		1.69777	11.8421		1.27333	20.6929		1.27333	13.232		1.27333	23.6969		1.27333	23.0337		1.27333	28.0343		1.27333	24.475		1.27333	15.2397		1.27333	21.5384		1.27333	16.4674		1.27333	14.4414		1.27333	35.1971		1.27333	43.1734		1.27333	28.5027		1.27333
	1.27441	30.267		1.27441	14.9188		1.69921	11.9164		1.27441	20.7013		1.27441	13.182		1.27441	23.777		1.27441	23.0741		1.27441	28.1712		1.27441	24.5216		1.27441	15.2386		1.27441	21.572		1.27441	16.4241		1.27441	14.3962		1.27441	35.5237		1.27441	43.581		1.27441	28.6515		1.27441
	1.27549	30.4756		1.27549	14.8687		1.70065	11.9933		1.27549	20.7117		1.27549	13.134		1.27549	23.8572		1.27549	23.1168		1.27549	28.3123		1.27549	24.5728		1.27549	15.2403		1.27549	21.6086		1.27549	16.3808		1.27549	14.3543		1.27549	35.8593		1.27549	44.0032		1.27549	28.8039		1.27549
	1.27657	30.6951		1.27657	14.8203		1.70209	12.0726		1.27657	20.725		1.27657	13.088		1.27657	23.9358		1.27657	23.1625		1.27657	28.4591		1.27657	24.6295		1.27657	15.2442		1.27657	21.6491		1.27657	16.3376		1.27657	14.3161		1.27657	36.2044		1.27657	44.4408		1.27657	28.9603		1.27657
	1.27765	30.9251		1.27765	14.7728		1.70353	12.1541		1.27765	20.7418		1.27765	13.0441		1.27765	24.0123		1.27765	23.2123		1.27765	28.6133		1.27765	24.6918		1.27765	15.2501		1.27765	21.6942		1.27765	16.295		1.27765	14.2813		1.27765	36.5597		1.27765	44.8934		1.27765	29.1219		1.27765
	1.27873	31.1649		1.27873	14.7254		1.70497	12.2379		1.27873	20.7621		1.27873	13.002		1.27873	24.0872		1.27873	23.2679		1.27873	28.7767		1.27873	24.7596		1.27873	15.2573		1.27873	21.7442		1.27873	16.2537		1.27873	14.2491		1.27873	36.9259		1.27873	45.36		1.27873	29.2896		1.27873
	1.27981	31.414		1.27981	14.6773		1.70641	12.3242		1.27981	20.7856		1.27981	12.9616		1.27981	24.1616		1.27981	23.331		1.27981	28.951		1.27981	24.8326		1.27981	15.2652		1.27981	21.7991		1.27981	16.2141		1.27981	14.2186		1.27981	37.3038		1.27981	45.8397		1.27981	29.4643		1.27981
	1.28089	31.6725		1.28089	14.6278		1.70785	12.4133		1.28089	20.8118		1.28089	12.9222		1.28089	24.2369		1.28089	23.4034		1.28089	29.1377		1.28089	24.9103		1.28089	15.2736		1.28089	21.8593		1.28089	16.1761		1.28089	14.1891		1.28089	37.6933		1.28089	46.3317		1.28089	29.6467		1.28089
	1.28197	31.9402		1.28197	14.5771		1.70929	12.5053		1.28197	20.8399		1.28197	12.8829		1.28197	24.3147		1.28197	23.4858		1.28197	29.3376		1.28197	24.9922		1.28197	15.2826		1.28197	21.9253		1.28197	16.1388		1.28197	14.1599		1.28197	38.0934		1.28197	46.8358		1.28197	29.8369		1.28197
	1.28305	32.2162		1.28305	14.5259		1.71073	12.6001		1.28305	20.8691		1.28305	12.8431		1.28305	24.3973		1.28305	23.5783		1.28305	29.5503		1.28305	25.0778		1.28305	15.2925		1.28305	21.9974		1.28305	16.1015		1.28305	14.1301		1.28305	38.5027		1.28305	47.3522		1.28305	30.0349		1.28305
	1.28413	32.4994		1.28413	14.4755		1.71217	12.6974		1.28413	20.8985		1.28413	12.8026		1.28413	24.4877		1.28413	23.6797		1.28413	29.775		1.28413	25.1666		1.28413	15.3036		1.28413	22.0754		1.28413	16.0632		1.28413	14.099		1.28413	38.9201		1.28413	47.8816		1.28413	30.2407		1.28413
	1.28521	32.7887		1.28521	14.4276		1.71361	12.7965		1.28521	20.9272		1.28521	12.7622		1.28521	24.5884		1.28521	23.7882		1.28521	30.01		1.28521	25.2578		1.28521	15.3161		1.28521	22.1585		1.28521	16.0233		1.28521	14.0662		1.28521	39.3453		1.28521	48.4242		1.28521	30.4546		1.28521
	1.28629	33.0842		1.28629	14.383		1.71505	12.8971		1.28629	20.9551		1.28629	12.7228		1.28629	24.7002		1.28629	23.9016		1.28629	30.2538		1.28629	25.3516		1.28629	15.3299		1.28629	22.246		1.28629	15.9811		1.28629	14.0319		1.28629	39.7785		1.28629	48.9804		1.28629	30.6765		1.28629
	1.28737	33.3861		1.28737	14.3422		1.71649	12.9987		1.28737	20.9827		1.28737	12.6855		1.28737	24.8227		1.28737	24.0175		1.28737	30.5047		1.28737	25.4483		1.28737	15.3453		1.28737	22.3371		1.28737	15.9364		1.28737	13.997		1.28737	40.2206		1.28737	49.5502		1.28737	30.9061		1.28737
	1.28845	33.6948		1.28845	14.3045		1.71793	13.1015		1.28845	21.011		1.28845	12.6507		1.28845	24.9543		1.28845	24.1341		1.28845	30.761		1.28845	25.5483		1.28845	15.3626		1.28845	22.4314		1.28845	15.8893		1.28845	13.9619		1.28845	40.6727		1.28845	50.1335		1.28845	31.1421		1.28845
	1.28953	34.0106		1.28953	14.2687		1.71937	13.2054		1.28953	21.0418		1.28953	12.6187		1.28953	25.0931		1.28953	24.2504		1.28953	31.0206		1.28953	25.652		1.28953	15.3819		1.28953	22.5284		1.28953	15.8405		1.28953	13.9274		1.28953	41.1354		1.28953	50.7305		1.28953	31.3833		1.28953
	1.29061	34.334		1.29061	14.233		1.72081	13.3109		1.29061	21.0765		1.29061	12.5898		1.29061	25.237		1.29061	24.3663		1.29061	31.2819		1.29061	25.7597		1.29061	15.4029		1.29061	22.6274		1.29061	15.791		1.29061	13.894		1.29061	41.6091		1.29061	51.3407		1.29061	31.6287		1.29061
	1.29169	34.6659		1.29169	14.1954		1.72225	13.4177		1.29169	21.1164		1.29169	12.5639		1.29169	25.384		1.29169	24.4826		1.29169	31.5437		1.29169	25.8715		1.29169	15.4252		1.29169	22.7282		1.29169	15.7422		1.29169	13.8621		1.29169	42.0939		1.29169	51.963		1.29169	31.8775		1.29169
	1.29277	35.0074		1.29277	14.1543		1.72369	13.5253		1.29277	21.1625		1.29277	12.5403		1.29277	25.5327		1.29277	24.6011		1.29277	31.8056		1.29277	25.9873		1.29277	15.4481		1.29277	22.8311		1.29277	15.6952		1.29277	13.832		1.29277	42.5897		1.29277	52.5959		1.29277	32.1293		1.29277
	1.29385	35.3586		1.29385	14.1089		1.72513	13.6326		1.29385	21.2152		1.29385	12.5173		1.29385	25.6823		1.29385	24.7234		1.29385	32.0676		1.29385	26.1066		1.29385	15.4708		1.29385	22.9375		1.29385	15.6512		1.29385	13.8036		1.29385	43.0958		1.29385	53.2382		1.29385	32.3839		1.29385
	1.29493	35.7188		1.29493	14.0592		1.72657	13.7383		1.29493	21.2746		1.29493	12.4927		1.29493	25.8328		1.29493	24.851		1.29493	32.33		1.29493	26.2289		1.29493	15.4927		1.29493	23.0489		1.29493	15.6106		1.29493	13.7767		1.29493	43.6109		1.29493	53.8891		1.29493	32.6416		1.29493
	1.29601	36.0867		1.29601	14.006		1.72801	13.8414		1.29601	21.3404		1.29601	12.4649		1.29601	25.9843		1.29601	24.9845		1.29601	32.5933		1.29601	26.3538		1.29601	15.5133		1.29601	23.1666		1.29601	15.574		1.29601	13.7506		1.29601	44.1333		1.29601	54.5486		1.29601	32.9038		1.29601
	1.29709	36.461		1.29709	13.9507		1.72945	13.9407		1.29709	21.4117		1.29709	12.4329		1.29709	26.1373		1.29709	25.1239		1.29709	32.8583		1.29709	26.4818		1.29709	15.5328		1.29709	23.291		1.29709	15.5412		1.29709	13.7246		1.29709	44.6613		1.29709	55.2163		1.29709	33.1726		1.29709
	1.29817	36.8412		1.29817	13.8949		1.73089	14.0354		1.29817	21.4867		1.29817	12.397		1.29817	26.2923		1.29817	25.2682		1.29817	33.1266		1.29817	26.6132		1.29817	15.552		1.29817	23.422		1.29817	15.5122		1.29817	13.6983		1.29817	45.1942		1.29817	55.8919		1.29817	33.4502		1.29817
	1.29925	37.2265		1.29925	13.8401		1.73233	14.1252		1.29925	21.5637		1.29925	12.3578		1.29925	26.4497		1.29925	25.4168		1.29925	33.3997		1.29925	26.7486		1.29925	15.5726		1.29925	23.5597		1.29925	15.4867		1.29925	13.6715		1.29925	45.7315		1.29925	56.5751		1.29925	33.7383		1.29925
	1.30033	37.6164		1.30033	13.7874		1.73377	14.2104		1.30033	21.641		1.30033	12.3167		1.30033	26.61		1.30033	25.5686		1.30033	33.6792		1.30033	26.8883		1.30033	15.5967		1.30033	23.7035		1.30033	15.4638		1.30033	13.6448		1.30033	46.2734		1.30033	57.2661		1.30033	34.0376		1.30033
	1.30141	38.0104		1.30141	13.7371		1.73521	14.2923		1.30141	21.718		1.30141	12.2754		1.30141	26.7735		1.30141	25.7232		1.30141	33.9656		1.30141	27.0326		1.30141	15.6265		1.30141	23.8528		1.30141	15.4425		1.30141	13.619		1.30141	46.819		1.30141	57.9656		1.30141	34.3475		1.30141
	1.30249	38.4087		1.30249	13.6891		1.73665	14.3724		1.30249	21.7944		1.30249	12.2364		1.30249	26.9403		1.30249	25.8811		1.30249	34.259		1.30249	27.1816		1.30249	15.6641		1.30249	24.0062		1.30249	15.4216		1.30249	13.5946		1.30249	47.3673		1.30249	58.6737		1.30249	34.6671		1.30249
	1.30357	38.8119		1.30357	13.6432		1.73809	14.452		1.30357	21.8703		1.30357	12.2018		1.30357	27.1102		1.30357	26.0433		1.30357	34.559		1.30357	27.3353		1.30357	15.7107		1.30357	24.1624		1.30357	15.4001		1.30357	13.5721		1.30357	47.9169		1.30357	59.3903		1.30357	34.9944		1.30357
	1.30465	39.2208		1.30465	13.5986		1.73953	14.532		1.30465	21.9461		1.30465	12.1733		1.30465	27.2828		1.30465	26.2111		1.30465	34.8655		1.30465	27.4938		1.30465	15.766		1.30465	24.321		1.30465	15.3774		1.30465	13.5517		1.30465	48.4665		1.30465	60.1143		1.30465	35.3272		1.30465
	1.30573	39.6361		1.30573	13.5546		1.74097	14.6131		1.30573	22.022		1.30573	12.1514		1.30573	27.4579		1.30573	26.3853		1.30573	35.1781		1.30573	27.6564		1.30573	15.8286		1.30573	24.482		1.30573	15.3531		1.30573	13.5333		1.30573	49.015		1.30573	60.8449		1.30573	35.6628		1.30573
	1.30681	40.0585		1.30681	13.5101		1.74241	14.6961		1.30681	22.098		1.30681	12.1352		1.30681	27.6351		1.30681	26.5661		1.30681	35.4963		1.30681	27.8226		1.30681	15.896		1.30681	24.6457		1.30681	15.3275		1.30681	13.5162		1.30681	49.5611		1.30681	61.5815		1.30681	35.9984		1.30681
	1.30789	40.4889		1.30789	13.4651		1.74385	14.7817		1.30789	22.1748		1.30789	12.1235		1.30789	27.8141		1.30789	26.7528		1.30789	35.8192		1.30789	27.9919		1.30789	15.9655		1.30789	24.8126		1.30789	15.3011		1.30789	13.4995		1.30789	50.1038		1.30789	62.324		1.30789	36.332		1.30789
	1.30897	40.9281		1.30897	13.4196		1.74529	14.8703		1.30897	22.2526		1.30897	12.1149		1.30897	27.9937		1.30897	26.9441		1.30897	36.1459		1.30897	28.1641		1.30897	16.0348		1.30897	24.9827		1.30897	15.275		1.30897	13.4819		1.30897	50.6429		1.30897	63.0724		1.30897	36.6622		1.30897
	1.31005	41.3766		1.31005	13.3742		1.74673	14.9616		1.31005	22.3316		1.31005	12.1082		1.31005	28.1731		1.31005	27.1379		1.31005	36.4759		1.31005	28.339		1.31005	16.1022		1.31005	25.1563		1.31005	15.2503		1.31005	13.4626		1.31005	51.1786		1.31005	63.8263		1.31005	36.9887		1.31005
	1.31113	41.8341		1.31113	13.3292		1.74817	15.0545		1.31113	22.4113		1.31113	12.1022		1.31113	28.3521		1.31113	27.3321		1.31113	36.809		1.31113	28.5165		1.31113	16.167		1.31113	25.3335		1.31113	15.2281		1.31113	13.4414		1.31113	51.712		1.31113	64.5849		1.31113	37.3117		1.31113
	1.31221	42.2994		1.31221	13.285		1.74961	15.1473		1.31221	22.4913		1.31221	12.0955		1.31221	28.5317		1.31221	27.5245		1.31221	37.1454		1.31221	28.6958		1.31221	16.2299		1.31221	25.5143		1.31221	15.2094		1.31221	13.4188		1.31221	52.2442		1.31221	65.3472		1.31221	37.6321		1.31221
	1.31329	42.7711		1.31329	13.2419		1.75105	15.2385		1.31329	22.5711		1.31329	12.0869		1.31329	28.7133		1.31329	27.7138		1.31329	37.4842		1.31329	28.8757		1.31329	16.2928		1.31329	25.6982		1.31329	15.1946		1.31329	13.3954		1.31329	52.7755		1.31329	66.1122		1.31329	37.951		1.31329
	1.31437	43.2471		1.31437	13.2004		1.75249	15.3265		1.31437	22.651		1.31437	12.0753		1.31437	28.8983		1.31437	27.8999		1.31437	37.8238		1.31437	29.0551		1.31437	16.358		1.31437	25.8848		1.31437	15.1837		1.31437	13.3721		1.31437	53.306		1.31437	66.8788		1.31437	38.2703		1.31437
	1.31545	43.7255		1.31545	13.161		1.75393	15.4102		1.31545	22.7315		1.31545	12.0604		1.31545	29.0874		1.31545	28.0837		1.31545	38.1623		1.31545	29.2335		1.31545	16.4281		1.31545	26.0742		1.31545	15.1758		1.31545	13.3496		1.31545	53.8342		1.31545	67.6461		1.31545	38.5919		1.31545
	1.31653	44.2039		1.31653	13.1237		1.75537	15.4884		1.31653	22.8128		1.31653	12.042		1.31653	29.2803		1.31653	28.2664		1.31653	38.4978		1.31653	29.4107		1.31653	16.5046		1.31653	26.2668		1.31653	15.1697		1.31653	13.3288		1.31653	54.3582		1.31653	68.4133		1.31653	38.9177		1.31653
	1.31761	44.6802		1.31761	13.0888		1.75681	15.5605		1.31761	22.895		1.31761	12.02		1.31761	29.4768		1.31761	28.4491		1.31761	38.8289		1.31761	29.5868		1.31761	16.5887		1.31761	26.4632		1.31761	15.1639		1.31761	13.3102		1.31761	54.8753		1.31761	69.18		1.31761	39.2487		1.31761
	1.31869	45.153		1.31869	13.056		1.75825	15.6265		1.31869	22.9784		1.31869	11.9942		1.31869	29.6761		1.31869	28.633		1.31869	39.1548		1.31869	29.7619		1.31869	16.6805		1.31869	26.6638		1.31869	15.1577		1.31869	13.294		1.31869	55.383		1.31869	69.9465		1.31869	39.5853		1.31869
	1.31977	45.6217		1.31977	13.0251		1.75969	15.6872		1.31977	23.0633		1.31977	11.9649		1.31977	29.877		1.31977	28.8184		1.31977	39.4746		1.31977	29.9367		1.31977	16.7788		1.31977	26.8689		1.31977	15.1503		1.31977	13.2802		1.31977	55.8797		1.31977	70.7137		1.31977	39.9273		1.31977
	1.32085	46.0867		1.32085	12.9963		1.76113	15.7434		1.32085	23.15		1.32085	11.9333		1.32085	30.0775		1.32085	29.0055		1.32085	39.7879		1.32085	30.112		1.32085	16.8814		1.32085	27.0788		1.32085	15.141		1.32085	13.2682		1.32085	56.3647		1.32085	71.4823		1.32085	40.2736		1.32085
	1.32193	46.5485		1.32193	12.9698		1.76257	15.7957		1.32193	23.2384		1.32193	11.9011		1.32193	30.2751		1.32193	29.1943		1.32193	40.0955		1.32193	30.2891		1.32193	16.9855		1.32193	27.2936		1.32193	15.1291		1.32193	13.2576		1.32193	56.8379		1.32193	72.2527		1.32193	40.6226		1.32193
	1.32301	47.008		1.32301	12.9461		1.76401	15.8439		1.32301	23.3283		1.32301	11.8701		1.32301	30.4683		1.32301	29.3846		1.32301	40.3996		1.32301	30.4689		1.32301	17.0883		1.32301	27.5129		1.32301	15.1142		1.32301	13.2478		1.32301	57.2999		1.32301	73.024		1.32301	40.9721		1.32301
	1.32409	47.4664		1.32409	12.9251		1.76545	15.8878		1.32409	23.419		1.32409	11.8413		1.32409	30.6563		1.32409	29.5763		1.32409	40.7028		1.32409	30.652		1.32409	17.1877		1.32409	27.7359		1.32409	15.0964		1.32409	13.2384		1.32409	57.7516		1.32409	73.7946		1.32409	41.3199		1.32409
	1.32517	47.9249		1.32517	12.9064		1.76689	15.9273		1.32517	23.5102		1.32517	11.8154		1.32517	30.8395		1.32517	29.7692		1.32517	41.0072		1.32517	30.8383		1.32517	17.2819		1.32517	27.9614		1.32517	15.0763		1.32517	13.2291		1.32517	58.1945		1.32517	74.5619		1.32517	41.6643		1.32517
	1.32625	48.3848		1.32625	12.8897		1.76833	15.9629		1.32625	23.6012		1.32625	11.7926		1.32625	31.0187		1.32625	29.9631		1.32625	41.3138		1.32625	31.0273		1.32625	17.3703		1.32625	28.188		1.32625	15.0546		1.32625	13.2198		1.32625	58.6299		1.32625	75.323		1.32625	42.0045		1.32625
	1.32733	48.8475		1.32733	12.8746		1.76977	15.9955		1.32733	23.6912		1.32733	11.7729		1.32733	31.1945		1.32733	30.1578		1.32733	41.6226		1.32733	31.2182		1.32733	17.4525		1.32733	28.4144		1.32733	15.0317		1.32733	13.2103		1.32733	59.0585		1.32733	76.0753		1.32733	42.3402		1.32733
	1.32841	49.3136		1.32841	12.8609		1.77121	16.0258		1.32841	23.7793		1.32841	11.7557		1.32841	31.3672		1.32841	30.3535		1.32841	41.933		1.32841	31.4095		1.32841	17.5297		1.32841	28.6398		1.32841	15.0078		1.32841	13.2005		1.32841	59.4796		1.32841	76.8166		1.32841	42.6714		1.32841
	1.32949	49.7833		1.32949	12.8477		1.77265	16.0545		1.32949	23.865		1.32949	11.7404		1.32949	31.5373		1.32949	30.5502		1.32949	42.2439		1.32949	31.5997		1.32949	17.6042		1.32949	28.8636		1.32949	14.9835		1.32949	13.1908		1.32949	59.8917		1.32949	77.5452		1.32949	42.9981		1.32949
	1.33057	50.2557		1.33057	12.8337		1.77409	16.0816		1.33057	23.9482		1.33057	11.7259		1.33057	31.7053		1.33057	30.7476		1.33057	42.5534		1.33057	31.7873		1.33057	17.6788		1.33057	29.0856		1.33057	14.9594		1.33057	13.1816		1.33057	60.2934		1.33057	78.2605		1.33057	43.3205		1.33057
	1.33165	50.7295		1.33165	12.8173		1.77553	16.1073		1.33165	24.0287		1.33165	11.7114		1.33165	31.8718		1.33165	30.9446		1.33165	42.859		1.33165	31.9706		1.33165	17.7565		1.33165	29.306		1.33165	14.9361		1.33165	13.1732		1.33165	60.6837		1.33165	78.9619		1.33165	43.6391		1.33165
	1.33273	51.2027		1.33273	12.7974		1.77697	16.1312		1.33273	24.1067		1.33273	11.6963		1.33273	32.0373		1.33273	31.14		1.33273	43.1584		1.33273	32.1481		1.33273	17.8395		1.33273	29.525		1.33273	14.9137		1.33273	13.1654		1.33273	61.0616		1.33273	79.6492		1.33273	43.9534		1.33273
	1.33381	51.673		1.33381	12.7734		1.77841	16.1527		1.33381	24.1821		1.33381	11.6808		1.33381	32.2021		1.33381	31.3325		1.33381	43.4495		1.33381	32.3185		1.33381	17.9292		1.33381	29.7432		1.33381	14.8918		1.33381	13.1579		1.33381	61.4262		1.33381	80.3223		1.33381	44.2629		1.33381
	1.33489	52.1382		1.33489	12.7448		1.77985	16.171		1.33489	24.2554		1.33489	11.6647		1.33489	32.3662		1.33489	31.5212		1.33489	43.7316		1.33489	32.4819		1.33489	18.0257		1.33489	29.9609		1.33489	14.8699		1.33489	13.1507		1.33489	61.7765		1.33489	80.981		1.33489	44.5668		1.33489
	1.33597	52.596		1.33597	12.7116		1.78129	16.1848		1.33597	24.3273		1.33597	11.6483		1.33597	32.5294		1.33597	31.7052		1.33597	44.005		1.33597	32.6394		1.33597	18.1281		1.33597	30.1785		1.33597	14.8478		1.33597	13.1437		1.33597	62.1119		1.33597	81.6253		1.33597	44.8646		1.33597
	1.33705	53.0442		1.33705	12.6744		1.78273	16.1936		1.33705	24.3983		1.33705	11.6313		1.33705	32.6917		1.33705	31.8838		1.33705	44.2705		1.33705	32.7925		1.33705	18.2336		1.33705	30.396		1.33705	14.826		1.33705	13.1368		1.33705	62.4322		1.33705	82.2556		1.33705	45.1568		1.33705
	1.33813	53.4817		1.33813	12.6345		1.78417	16.1973		1.33813	24.4685		1.33813	11.6136		1.33813	32.8528		1.33813	32.056		1.33813	44.5294		1.33813	32.9432		1.33813	18.3392		1.33813	30.6132		1.33813	14.805		1.33813	13.1297		1.33813	62.7372		1.33813	82.8724		1.33813	45.4445		1.33813
	1.33921	53.9079		1.33921	12.5935		1.78561	16.1967		1.33921	24.5375		1.33921	11.5948		1.33921	33.0123		1.33921	32.2212		1.33921	44.7826		1.33921	33.0933		1.33921	18.4418		1.33921	30.8296		1.33921	14.7853		1.33921	13.1225		1.33921	63.0262		1.33921	83.4767		1.33921	45.7286		1.33921
	1.34029	54.3233		1.34029	12.553		1.78705	16.1926		1.34029	24.6049		1.34029	11.575		1.34029	33.1696		1.34029	32.3793		1.34029	45.0309		1.34029	33.244		1.34029	18.5388		1.34029	31.045		1.34029	14.7676		1.34029	13.1154		1.34029	63.298		1.34029	84.0698		1.34029	46.0103		1.34029
	1.34137	54.7285		1.34137	12.5147		1.78849	16.1853		1.34137	24.6705		1.34137	11.5544		1.34137	33.3242		1.34137	32.5304		1.34137	45.2752		1.34137	33.3964		1.34137	18.6288		1.34137	31.2589		1.34137	14.7526		1.34137	13.1089		1.34137	63.5515		1.34137	84.6533		1.34137	46.2904		1.34137
	1.34245	55.124		1.34245	12.4794		1.78993	16.1745		1.34245	24.7343		1.34245	11.5336		1.34245	33.4751		1.34245	32.6749		1.34245	45.5158		1.34245	33.5505		1.34245	18.7117		1.34245	31.4711		1.34245	14.7415		1.34245	13.1037		1.34245	63.7865		1.34245	85.2289		1.34245	46.5692		1.34245
	1.34353	55.5099		1.34353	12.4477		1.79137	16.16		1.34353	24.7964		1.34353	11.5132		1.34353	33.6219		1.34353	32.8132		1.34353	45.7522		1.34353	33.7053		1.34353	18.789		1.34353	31.6809		1.34353	14.7349		1.34353	13.0996		1.34353	64.0034		1.34353	85.7977		1.34353	46.8462		1.34353
	1.34461	55.8866		1.34461	12.4191		1.79281	16.1419		1.34461	24.8565		1.34461	11.4939		1.34461	33.7638		1.34461	32.9458		1.34461	45.9833		1.34461	33.8588		1.34461	18.8634		1.34461	31.8875		1.34461	14.733		1.34461	13.0964		1.34461	64.2033		1.34461	86.3596		1.34461	47.1199		1.34461
	1.34569	56.2542		1.34569	12.3931		1.79425	16.1207		1.34569	24.9147		1.34569	11.4763		1.34569	33.9001		1.34569	33.0733		1.34569	46.2072		1.34569	34.0084		1.34569	18.9382		1.34569	32.0896		1.34569	14.7344		1.34569	13.0935		1.34569	64.3874		1.34569	86.9134		1.34569	47.3884		1.34569
	1.34677	56.613		1.34677	12.3688		1.79569	16.0971		1.34677	24.9711		1.34677	11.4609		1.34677	34.0302		1.34677	33.197		1.34677	46.4224		1.34677	34.1518		1.34677	19.0159		1.34677	32.2867		1.34677	14.7374		1.34677	13.0906		1.34677	64.557		1.34677	87.4573		1.34677	47.6494		1.34677
	1.34785	56.9628		1.34785	12.3455		1.79713	16.0719		1.34785	25.0261		1.34785	11.4479		1.34785	34.1539		1.34785	33.3179		1.34785	46.6277		1.34785	34.2874		1.34785	19.0977		1.34785	32.4783		1.34785	14.7399		1.34785	13.0872		1.34785	64.7134		1.34785	87.9886		1.34785	47.9014		1.34785
	1.34893	57.3033		1.34893	12.3225		1.79857	16.0462		1.34893	25.0805		1.34893	11.437		1.34893	34.271		1.34893	33.4369		1.34893	46.8225		1.34893	34.4148		1.34893	19.1835		1.34893	32.6641		1.34893	14.7401		1.34893	13.0828		1.34893	64.8575		1.34893	88.5046		1.34893	48.143		1.34893
	1.35001	57.634		1.35001	12.2988		1.80001	16.0217		1.35001	25.1341		1.35001	11.4275		1.35001	34.3812		1.35001	33.5546		1.35001	47.0066		1.35001	34.5341		1.35001	19.2724		1.35001	32.8443		1.35001	14.7367		1.35001	13.0766		1.35001	64.9894		1.35001	89.0029		1.35001	48.3735		1.35001
	1.35109	57.9549		1.35109	12.2735		1.80145	15.9998		1.35109	25.1864		1.35109	11.418		1.35109	34.4845		1.35109	33.6712		1.35109	47.1801		1.35109	34.6465		1.35109	19.3628		1.35109	33.0196		1.35109	14.7285		1.35109	13.0681		1.35109	65.1084		1.35109	89.4808		1.35109	48.5925		1.35109
	1.35217	58.2655		1.35217	12.246		1.80289	15.9816		1.35217	25.2363		1.35217	11.407		1.35217	34.5815		1.35217	33.787		1.35217	47.3431		1.35217	34.7534		1.35217	19.4526		1.35217	33.1908		1.35217	14.7146		1.35217	13.0573		1.35217	65.213		1.35217	89.9361		1.35217	48.8002		1.35217
	1.35325	58.5657		1.35325	12.216		1.80433	15.9667		1.35325	25.2828		1.35325	11.3937		1.35325	34.6733		1.35325	33.9015		1.35325	47.4965		1.35325	34.8566		1.35325	19.5398		1.35325	33.3588		1.35325	14.695		1.35325	13.0442		1.35325	65.3008		1.35325	90.3671		1.35325	48.9968		1.35325
	1.35433	58.8548		1.35433	12.1839		1.80577	15.9541		1.35433	25.3252		1.35433	11.3778		1.35433	34.7612		1.35433	34.0138		1.35433	47.6406		1.35433	34.9577		1.35433	19.6227		1.35433	33.5241		1.35433	14.6707		1.35433	13.0292		1.35433	65.3697		1.35433	90.7726		1.35433	49.1826		1.35433
	1.35541	59.1322		1.35541	12.1496		1.80721	15.9419		1.35541	25.3631		1.35541	11.3593		1.35541	34.8456		1.35541	34.1227		1.35541	47.776		1.35541	35.058		1.35541	19.7007		1.35541	33.6867		1.35541	14.6437		1.35541	13.0125		1.35541	65.4176		1.35541	91.152		1.35541	49.3575		1.35541
	1.35649	59.398		1.35649	12.1137		1.80865	15.9281		1.35649	25.3964		1.35649	11.3384		1.35649	34.9269		1.35649	34.2271		1.35649	47.9032		1.35649	35.1575		1.35649	19.7742		1.35649	33.8465		1.35649	14.6158		1.35649	12.9947		1.35649	65.4429		1.35649	91.5052		1.35649	49.5214		1.35649
	1.35757	59.6527		1.35757	12.0766		1.81009	15.9112		1.35757	25.4245		1.35757	11.3158		1.35757	35.0052		1.35757	34.326		1.35757	48.0224		1.35757	35.2552		1.35757	19.8444		1.35757	34.0033		1.35757	14.5882		1.35757	12.9766		1.35757	65.4452		1.35757	91.8323		1.35757	49.6742		1.35757
	1.35865	59.8972		1.35865	12.0393		1.81153	15.8897		1.35865	25.4476		1.35865	11.2924		1.35865	35.0808		1.35865	34.4185		1.35865	48.1335		1.35865	35.3495		1.35865	19.913		1.35865	34.1572		1.35865	14.5615		1.35865	12.959		1.35865	65.425		1.35865	92.1334		1.35865	49.8165		1.35865
	1.35973	60.1325		1.35973	12.003		1.81297	15.8629		1.35973	25.4659		1.35973	11.2691		1.35973	35.154		1.35973	34.5032		1.35973	48.2356		1.35973	35.4392		1.35973	19.9812		1.35973	34.3077		1.35973	14.5362		1.35973	12.9431		1.35973	65.3835		1.35973	92.4092		1.35973	49.9489		1.35973
	1.36081	60.3596		1.36081	11.9688		1.81441	15.8303		1.36081	25.4804		1.36081	11.247		1.36081	35.2241		1.36081	34.5787		1.36081	48.3277		1.36081	35.5234		1.36081	20.0497		1.36081	34.4544		1.36081	14.5127		1.36081	12.9294		1.36081	65.3221		1.36081	92.6607		1.36081	50.0723		1.36081
	1.36189	60.5798		1.36189	11.9375		1.81585	15.7924		1.36189	25.4918		1.36189	11.2265		1.36189	35.29		1.36189	34.6439		1.36189	48.4088		1.36189	35.6014		1.36189	20.1185		1.36189	34.5967		1.36189	14.4913		1.36189	12.9183		1.36189	65.2425		1.36189	92.8898		1.36189	50.1878		1.36189
	1.36297	60.7938		1.36297	11.9093		1.81729	15.75		1.36297	25.5009		1.36297	11.2079		1.36297	35.3505		1.36297	34.6982		1.36297	48.4784		1.36297	35.6731		1.36297	20.1875		1.36297	34.7342		1.36297	14.4714		1.36297	12.9094		1.36297	65.1466		1.36297	93.0989		1.36297	50.2962		1.36297
	1.36405	61.0015		1.36405	11.8844		1.81873	15.7045		1.36405	25.5077		1.36405	11.1919		1.36405	35.4044		1.36405	34.7411		1.36405	48.5359		1.36405	35.7385		1.36405	20.2564		1.36405	34.8662		1.36405	14.4523		1.36405	12.9022		1.36405	65.0366		1.36405	93.2902		1.36405	50.3987		1.36405
	1.36513	61.2014		1.36513	11.8624		1.82017	15.6569		1.36513	25.5117		1.36513	11.1788		1.36513	35.4513		1.36513	34.7726		1.36513	48.581		1.36513	35.798		1.36513	20.3247		1.36513	34.9918		1.36513	14.4326		1.36513	12.8955		1.36513	64.9141		1.36513	93.4654		1.36513	50.4959		1.36513
	1.36621	61.3912		1.36621	11.843		1.82161	15.6073		1.36621	25.513		1.36621	11.1689		1.36621	35.4903		1.36621	34.793		1.36621	48.6132		1.36621	35.8522		1.36621	20.3921		1.36621	35.1102		1.36621	14.4115		1.36621	12.888		1.36621	64.7804		1.36621	93.6256		1.36621	50.5879		1.36621
	1.36729	61.5684		1.36729	11.8258		1.82305	15.5556		1.36729	25.5119		1.36729	11.162		1.36729	35.5211		1.36729	34.8033		1.36729	48.6329		1.36729	35.9008		1.36729	20.4576		1.36729	35.2204		1.36729	14.3882		1.36729	12.8786		1.36729	64.636		1.36729	93.7711		1.36729	50.6742		1.36729
	1.36837	61.7312		1.36837	11.8102		1.82449	15.5015		1.36837	25.5087		1.36837	11.1573		1.36837	35.5435		1.36837	34.8054		1.36837	48.6409		1.36837	35.9431		1.36837	20.5203		1.36837	35.3219		1.36837	14.3625		1.36837	12.8667		1.36837	64.4814		1.36837	93.9015		1.36837	50.7535		1.36837
	1.36945	61.8781		1.36945	11.7955		1.82593	15.4447		1.36945	25.5033		1.36945	11.1541		1.36945	35.5575		1.36945	34.8013		1.36945	48.639		1.36945	35.9772		1.36945	20.5794		1.36945	35.4153		1.36945	14.3345		1.36945	12.8526		1.36945	64.317		1.36945	94.0153		1.36945	50.8242		1.36945
	1.37053	62.0082		1.37053	11.7814		1.82737	15.3847		1.37053	25.4952		1.37053	11.1517		1.37053	35.5636		1.37053	34.793		1.37053	48.6291		1.37053	36.0019		1.37053	20.6346		1.37053	35.5014		1.37053	14.3046		1.37053	12.8371		1.37053	64.1431		1.37053	94.1105		1.37053	50.8851		1.37053
	1.37161	62.1212		1.37161	11.7676		1.82881	15.3211		1.37161	25.484		1.37161	11.1489		1.37161	35.5624		1.37161	34.7816		1.37161	48.6128		1.37161	36.0162		1.37161	20.6854		1.37161	35.5813		1.37161	14.2739		1.37161	12.8217		1.37161	63.9594		1.37161	94.1852		1.37161	50.9351		1.37161
	1.37269	62.2176		1.37269	11.7543		1.83025	15.2539		1.37269	25.4695		1.37269	11.1451		1.37269	35.5541		1.37269	34.7679		1.37269	48.5911		1.37269	36.0203		1.37269	20.7315		1.37269	35.6564		1.37269	14.2436		1.37269	12.808		1.37269	63.7648		1.37269	94.2376		1.37269	50.9737		1.37269
	1.37377	62.2981		1.37377	11.7412		1.83169	15.1836		1.37377	25.4523		1.37377	11.1394		1.37377	35.5389		1.37377	34.752		1.37377	48.5641		1.37377	36.0149		1.37377	20.7725		1.37377	35.7271		1.37377	14.2152		1.37377	12.7975		1.37377	63.5581		1.37377	94.2667		1.37377	51.0013		1.37377
	1.37485	62.3635		1.37485	11.7281		1.83313	15.1109		1.37485	25.433		1.37485	11.1315		1.37485	35.5166		1.37485	34.7337		1.37485	48.5319		1.37485	36.0015		1.37485	20.8083		1.37485	35.7937		1.37485	14.1897		1.37485	12.7912		1.37485	63.3378		1.37485	94.2721		1.37485	51.0181		1.37485
	1.37593	62.4138		1.37593	11.7148		1.83457	15.0369		1.37593	25.4118		1.37593	11.1216		1.37593	35.4868		1.37593	34.7122		1.37593	48.4936		1.37593	35.9821		1.37593	20.8398		1.37593	35.8555		1.37593	14.1677		1.37593	12.789		1.37593	63.1034		1.37593	94.2537		1.37593	51.0244		1.37593
	1.37701	62.4484		1.37701	11.7009		1.83601	14.962		1.37701	25.3887		1.37701	11.11		1.37701	35.449		1.37701	34.6868		1.37701	48.4482		1.37701	35.959		1.37701	20.8682		1.37701	35.9111		1.37701	14.1487		1.37701	12.7899		1.37701	62.8544		1.37701	94.2118		1.37701	51.0206		1.37701
	1.37809	62.4666		1.37809	11.6865		1.83745	14.8866		1.37809	25.3639		1.37809	11.0969		1.37809	35.4034		1.37809	34.6566		1.37809	48.3939		1.37809	35.9345		1.37809	20.895		1.37809	35.959		1.37809	14.1318		1.37809	12.792		1.37809	62.591		1.37809	94.1473		1.37809	51.0071		1.37809
	1.37917	62.4679		1.37917	11.6715		1.83889	14.8107		1.37917	25.3375		1.37917	11.0821		1.37917	35.3507		1.37917	34.6211		1.37917	48.329		1.37917	35.9097		1.37917	20.9214		1.37917	35.9975		1.37917	14.1158		1.37917	12.7927		1.37917	62.3133		1.37917	94.0611		1.37917	50.9839		1.37917
	1.38025	62.4527		1.38025	11.6559		1.84033	14.7345		1.38025	25.3096		1.38025	11.0659		1.38025	35.2916		1.38025	34.5805		1.38025	48.2523		1.38025	35.8847		1.38025	20.9481		1.38025	36.0252		1.38025	14.0995		1.38025	12.7896		1.38025	62.0224		1.38025	93.9547		1.38025	50.9509		1.38025
	1.38133	62.422		1.38133	11.6397		1.84177	14.6575		1.38133	25.28		1.38133	11.0485		1.38133	35.2274		1.38133	34.535		1.38133	48.1638		1.38133	35.8588		1.38133	20.9754		1.38133	36.0416		1.38133	14.0819		1.38133	12.7813		1.38133	61.7199		1.38133	93.8293		1.38133	50.907		1.38133
	1.38241	62.3778		1.38241	11.6228		1.84321	14.5791		1.38241	25.2478		1.38241	11.0305		1.38241	35.1593		1.38241	34.4846		1.38241	48.0641		1.38241	35.8302		1.38241	21.0032		1.38241	36.0469		1.38241	14.0621		1.38241	12.7674		1.38241	61.4075		1.38241	93.6862		1.38241	50.8513		1.38241
	1.38349	62.3225		1.38349	11.6056		1.84465	14.4989		1.38349	25.2123		1.38349	11.0126		1.38349	35.0884		1.38349	34.4288		1.38349	47.9547		1.38349	35.7969		1.38349	21.0304		1.38349	36.0426		1.38349	14.0397		1.38349	12.7483		1.38349	61.0868		1.38349	93.526		1.38349	50.7831		1.38349
	1.38457	62.2587		1.38457	11.588		1.84609	14.4166		1.38457	25.1728		1.38457	10.9953		1.38457	35.0159		1.38457	34.3669		1.38457	47.8373		1.38457	35.7572		1.38457	21.0558		1.38457	36.031		1.38457	14.0145		1.38457	12.7252		1.38457	60.759		1.38457	93.3489		1.38457	50.7027		1.38457
	1.38565	62.1879		1.38565	11.5701		1.84753	14.3322		1.38565	25.1294		1.38565	10.9795		1.38565	34.9426		1.38565	34.2977		1.38565	47.713		1.38565	35.7097		1.38565	21.0778		1.38565	36.0138		1.38565	13.9869		1.38565	12.6997		1.38565	60.4243		1.38565	93.1543		1.38565	50.6108		1.38565
	1.38673	62.111		1.38673	11.5519		1.84897	14.2455		1.38673	25.0821		1.38673	10.9659		1.38673	34.8688		1.38673	34.2205		1.38673	47.5826		1.38673	35.6535		1.38673	21.0947		1.38673	35.9924		1.38673	13.9576		1.38673	12.674		1.38673	60.0829		1.38673	92.9408		1.38673	50.5085		1.38673
	1.38781	62.0272		1.38781	11.5329		1.85041	14.1563		1.38781	25.0313		1.38781	10.9549		1.38781	34.7938		1.38781	34.1347		1.38781	47.4465		1.38781	35.5883		1.38781	21.1054		1.38781	35.9671		1.38781	13.9269		1.38781	12.65		1.38781	59.7345		1.38781	92.7065		1.38781	50.3969		1.38781
	1.38889	61.935		1.38889	11.5133		1.85185	14.0647		1.38889	24.9774		1.38889	10.9463		1.38889	34.7163		1.38889	34.04		1.38889	47.3044		1.38889	35.5139		1.38889	21.1092		1.38889	35.9378		1.38889	13.8951		1.38889	12.6289		1.38889	59.3791		1.38889	92.4494		1.38889	50.277		1.38889
	1.38997	61.8321		1.38997	11.4932		1.85329	13.9714		1.38997	24.9205		1.38997	10.9392		1.38997	34.6347		1.38997	33.9362		1.38997	47.1557		1.38997	35.4307		1.38997	21.1065		1.38997	35.904		1.38997	13.8624		1.38997	12.6112		1.38997	59.0166		1.38997	92.1677		1.38997	50.1499		1.38997
	1.39105	61.7162		1.39105	11.4726		1.85473	13.8772		1.39105	24.8609		1.39105	10.9326		1.39105	34.5478		1.39105	33.8242		1.39105	46.9995		1.39105	35.3396		1.39105	21.0979		1.39105	35.8644		1.39105	13.8294		1.39105	12.5963		1.39105	58.6471		1.39105	91.8608		1.39105	50.0167		1.39105
	1.39213	61.5855		1.39213	11.4518		1.85617	13.7829		1.39213	24.7986		1.39213	10.9253		1.39213	34.4546		1.39213	33.7051		1.39213	46.8348		1.39213	35.2417		1.39213	21.0841		1.39213	35.8176		1.39213	13.7972		1.39213	12.5838		1.39213	58.2706		1.39213	91.5296		1.39213	49.8781		1.39213
	1.39321	61.4389		1.39321	11.4309		1.85761	13.6894		1.39321	24.7333		1.39321	10.9167		1.39321	34.3544		1.39321	33.5808		1.39321	46.661		1.39321	35.138		1.39321	21.0661		1.39321	35.7619		1.39321	13.7665		1.39321	12.5729		1.39321	57.887		1.39321	91.1762		1.39321	49.7343		1.39321
	1.39429	61.2766		1.39429	11.4101		1.85905	13.597		1.39429	24.6646		1.39429	10.9064		1.39429	34.2466		1.39429	33.4528		1.39429	46.4776		1.39429	35.0293		1.39429	21.0446		1.39429	35.6967		1.39429	13.738		1.39429	12.5629		1.39429	57.4964		1.39429	90.8033		1.39429	49.5848		1.39429
	1.39537	61.0997		1.39537	11.3897		1.86049	13.5065		1.39537	24.5923		1.39537	10.8943		1.39537	34.131		1.39537	33.3222		1.39537	46.2851		1.39537	34.9164		1.39537	21.021		1.39537	35.6224		1.39537	13.7114		1.39537	12.553		1.39537	57.099		1.39537	90.4135		1.39537	49.4285		1.39537
	1.39645	60.9099		1.39645	11.3698		1.86193	13.4184		1.39645	24.5168		1.39645	10.8805		1.39645	34.0084		1.39645	33.1895		1.39645	46.0842		1.39645	34.8001		1.39645	20.9962		1.39645	35.5398		1.39645	13.6867		1.39645	12.5418		1.39645	56.6952		1.39645	90.0089		1.39645	49.264		1.39645
	1.39753	60.7088		1.39753	11.3501		1.86337	13.3325		1.39753	24.4388		1.39753	10.8657		1.39753	33.8804		1.39753	33.0549		1.39753	45.8755		1.39753	34.6814		1.39753	20.9709		1.39753	35.4499		1.39753	13.6634		1.39753	12.5285		1.39753	56.2851		1.39753	89.5909		1.39753	49.0901		1.39753
	1.39861	60.498		1.39861	11.33		1.86481	13.2481		1.39861	24.3595		1.39861	10.8508		1.39861	33.7486		1.39861	32.9184		1.39861	45.6595		1.39861	34.5608		1.39861	20.9451		1.39861	35.3537		1.39861	13.6411		1.39861	12.5123		1.39861	55.8687		1.39861	89.16		1.39861	48.9062		1.39861
	1.39969	60.278		1.39969	11.3092		1.86625	13.1641		1.39969	24.2796		1.39969	10.8365		1.39969	33.6142		1.39969	32.7797		1.39969	45.4363		1.39969	34.4386		1.39969	20.9184		1.39969	35.2518		1.39969	13.6192		1.39969	12.493		1.39969	55.4461		1.39969	88.7162		1.39969	48.7118		1.39969
	1.40077	60.0491		1.40077	11.2881		1.86769	13.0794		1.40077	24.1998		1.40077	10.8232		1.40077	33.478		1.40077	32.6381		1.40077	45.2061		1.40077	34.3145		1.40077	20.8908		1.40077	35.1449		1.40077	13.5966		1.40077	12.4701		1.40077	55.0175		1.40077	88.2593		1.40077	48.5074		1.40077
	1.40185	59.8114		1.40185	11.2671		1.86913	12.9933		1.40185	24.1202		1.40185	10.811		1.40185	33.3403		1.40185	32.4926		1.40185	44.9697		1.40185	34.1882		1.40185	20.8619		1.40185	35.0335		1.40185	13.5728		1.40185	12.4439		1.40185	54.5837		1.40185	87.7891		1.40185	48.2941		1.40185
	1.40293	59.5649		1.40293	11.247		1.87057	12.9056		1.40293	24.0405		1.40293	10.7996		1.40293	33.2011		1.40293	32.3425		1.40293	44.7276		1.40293	34.059		1.40293	20.8314		1.40293	34.9175		1.40293	13.5477		1.40293	12.4148		1.40293	54.1456		1.40293	87.3065		1.40293	48.0736		1.40293
	1.40401	59.3096		1.40401	11.2284		1.87201	12.8161		1.40401	23.9602		1.40401	10.7889		1.40401	33.0601		1.40401	32.1877		1.40401	44.4807		1.40401	33.926		1.40401	20.7985		1.40401	34.7962		1.40401	13.5215		1.40401	12.3844		1.40401	53.7041		1.40401	86.8128		1.40401	47.848		1.40401
	1.40509	59.0458		1.40509	11.2119		1.87345	12.7252		1.40509	23.8783		1.40509	10.7787		1.40509	32.9166		1.40509	32.0287		1.40509	44.2294		1.40509	33.788		1.40509	20.7622		1.40509	34.6691		1.40509	13.4946		1.40509	12.3543		1.40509	53.2599		1.40509	86.3095		1.40509	47.6193		1.40509
	1.40617	58.7735		1.40617	11.1984		1.87489	12.6334		1.40617	23.7935		1.40617	10.7687		1.40617	32.7699		1.40617	31.8662		1.40617	43.9747		1.40617	33.644		1.40617	20.7218		1.40617	34.5358		1.40617	13.467		1.40617	12.3262		1.40617	52.8135		1.40617	85.7979		1.40617	47.389		1.40617
	1.40725	58.4931		1.40725	11.188		1.87633	12.5416		1.40725	23.7054		1.40725	10.7587		1.40725	32.6198		1.40725	31.7012		1.40725	43.7173		1.40725	33.4933		1.40725	20.6771		1.40725	34.3965		1.40725	13.4387		1.40725	12.3013		1.40725	52.3657		1.40725	85.2789		1.40725	47.1569		1.40725
	1.40833	58.2052		1.40833	11.1802		1.87777	12.4505		1.40833	23.6141		1.40833	10.7478		1.40833	32.4664		1.40833	31.5346		1.40833	43.4577		1.40833	33.3361		1.40833	20.6286		1.40833	34.2517		1.40833	13.4098		1.40833	12.28		1.40833	51.9173		1.40833	84.7533		1.40833	46.9221		1.40833
	1.40941	57.9102		1.40941	11.1739		1.87921	12.3609		1.40941	23.5205		1.40941	10.7353		1.40941	32.3103		1.40941	31.3675		1.40941	43.196		1.40941	33.1728		1.40941	20.5766		1.40941	34.102		1.40941	13.3805		1.40941	12.2621		1.40941	51.4691		1.40941	84.2206		1.40941	46.6827		1.40941
	1.41049	57.6086		1.41049	11.1676		1.88065	12.2724		1.41049	23.4258		1.41049	10.7203		1.41049	32.1524		1.41049	31.2006		1.41049	42.932		1.41049	33.0046		1.41049	20.5213		1.41049	33.9476		1.41049	13.3513		1.41049	12.2469		1.41049	51.0212		1.41049	83.6797		1.41049	46.4369		1.41049
	1.41157	57.3008		1.41157	11.1603		1.88209	12.1847		1.41157	23.3311		1.41157	10.7025		1.41157	31.9933		1.41157	31.0339		1.41157	42.6654		1.41157	32.8323		1.41157	20.463		1.41157	33.789		1.41157	13.3224		1.41157	12.2328		1.41157	50.5733		1.41157	83.1288		1.41157	46.1837		1.41157
	1.41265	56.9872		1.41265	11.1512		1.88353	12.0969		1.41265	23.237		1.41265	10.6819		1.41265	31.8338		1.41265	30.8667		1.41265	42.3963		1.41265	32.6572		1.41265	20.4016		1.41265	33.627		1.41265	13.2942		1.41265	12.2186		1.41265	50.1248		1.41265	82.5666		1.41265	45.9226		1.41265
	1.41373	56.6687		1.41373	11.1399		1.88497	12.0085		1.41373	23.1437		1.41373	10.6588		1.41373	31.6738		1.41373	30.6975		1.41373	42.1245		1.41373	32.4806		1.41373	20.3373		1.41373	33.462		1.41373	13.2663		1.41373	12.2029		1.41373	49.6754		1.41373	81.9928		1.41373	45.6539		1.41373
	1.41481	56.346		1.41481	11.1265		1.88641	11.9192		1.41481	23.0507		1.41481	10.6338		1.41481	31.5134		1.41481	30.5249		1.41481	41.8503		1.41481	32.3032		1.41481	20.2698		1.41481	33.2944		1.41481	13.2386		1.41481	12.1851		1.41481	49.2254		1.41481	81.4074		1.41481	45.3785		1.41481
	1.41589	56.0199		1.41589	11.1113		1.88785	11.829		1.41589	22.957		1.41589	10.6079		1.41589	31.3518		1.41589	30.3481		1.41589	41.5741		1.41589	32.1257		1.41589	20.1991		1.41589	33.1242		1.41589	13.2105		1.41589	12.165		1.41589	48.7756		1.41589	80.8105		1.41589	45.0979		1.41589
	1.41697	55.6911		1.41697	11.0952		1.88929	11.7382		1.41697	22.8617		1.41697	10.5821		1.41697	31.1883		1.41697	30.1669		1.41697	41.296		1.41697	31.9479		1.41697	20.1248		1.41697	32.951		1.41697	13.1812		1.41697	12.1427		1.41697	48.326		1.41697	80.2018		1.41697	44.8139		1.41697
	1.41805	55.3595		1.41805	11.079		1.89073	11.6472		1.41805	22.7638		1.41805	10.5574		1.41805	31.0217		1.41805	29.9816		1.41805	41.0165		1.41805	31.7699		1.41805	20.047		1.41805	32.7742		1.41805	13.1498		1.41805	12.1188		1.41805	47.8766		1.41805	79.5817		1.41805	44.5281		1.41805
	1.41913	55.0246		1.41913	11.0635		1.89217	11.5569		1.41913	22.6627		1.41913	10.5345		1.41913	30.8511		1.41913	29.7932		1.41913	40.7354		1.41913	31.5916		1.41913	19.9658		1.41913	32.5935		1.41913	13.1157		1.41913	12.0939		1.41913	47.4273		1.41913	78.9514		1.41913	44.2412		1.41913
	1.42021	54.6852		1.42021	11.0489		1.89361	11.4684		1.42021	22.558		1.42021	10.5136		1.42021	30.6757		1.42021	29.603		1.42021	40.4522		1.42021	31.4133		1.42021	19.882		1.42021	32.4085		1.42021	13.0786		1.42021	12.0686		1.42021	46.9787		1.42021	78.3125		1.42021	43.9531		1.42021
	1.42129	54.3402		1.42129	11.0349		1.89505	11.3825		1.42129	22.4497		1.42129	10.4946		1.42129	30.4952		1.42129	29.4122		1.42129	40.1663		1.42129	31.2352		1.42129	19.7961		1.42129	32.2189		1.42129	13.039		1.42129	12.0433		1.42129	46.5309		1.42129	77.6668		1.42129	43.6632		1.42129
	1.42237	53.9891		1.42237	11.0212		1.89649	11.2996		1.42237	22.3381		1.42237	10.4772		1.42237	30.3095		1.42237	29.2219		1.42237	39.8766		1.42237	31.0574		1.42237	19.7089		1.42237	32.0243		1.42237	12.9981		1.42237	12.0177		1.42237	46.0838		1.42237	77.0154		1.42237	43.3709		1.42237
	1.42345	53.6317		1.42345	11.0076		1.89793	11.2198		1.42345	22.224		1.42345	10.4612		1.42345	30.119		1.42345	29.0324		1.42345	39.5825		1.42345	30.8799		1.42345	19.6204		1.42345	31.8247		1.42345	12.9571		1.42345	11.9917		1.42345	45.6363		1.42345	76.3597		1.42345	43.0755		1.42345
	1.42453	53.268		1.42453	10.9938		1.89937	11.143		1.42453	22.1079		1.42453	10.4467		1.42453	29.924		1.42453	28.8428		1.42453	39.2834		1.42453	30.7021		1.42453	19.5306		1.42453	31.6203		1.42453	12.9175		1.42453	11.9651		1.42453	45.1876		1.42453	75.701		1.42453	42.7762		1.42453
	1.42561	52.8987		1.42561	10.9797		1.90081	11.0691		1.42561	21.9896		1.42561	10.4338		1.42561	29.7257		1.42561	28.6519		1.42561	38.9792		1.42561	30.5235		1.42561	19.4393		1.42561	31.4119		1.42561	12.8798		1.42561	11.9383		1.42561	44.7374		1.42561	75.0411		1.42561	42.4727		1.42561
	1.42669	52.5243		1.42669	10.9651		1.90225	10.9976		1.42669	21.8686		1.42669	10.4229		1.42669	29.5252		1.42669	28.4586		1.42669	38.6703		1.42669	30.3433		1.42669	19.3467		1.42669	31.2002		1.42669	12.8447		1.42669	11.9116		1.42669	44.2861		1.42669	74.3811		1.42669	42.1647		1.42669
	1.42777	52.1453		1.42777	10.9496		1.90369	10.9278		1.42777	21.7448		1.42777	10.4139		1.42777	29.3238		1.42777	28.2629		1.42777	38.3573		1.42777	30.161		1.42777	19.2536		1.42777	30.9864		1.42777	12.8122		1.42777	11.8856		1.42777	43.8346		1.42777	73.7214		1.42777	41.8524		1.42777
	1.42885	51.7617		1.42885	10.9333		1.90513	10.8586		1.42885	21.6185		1.42885	10.4066		1.42885	29.1224		1.42885	28.0652		1.42885	38.0409		1.42885	29.9765		1.42885	19.1606		1.42885	30.7712		1.42885	12.782		1.42885	11.8606		1.42885	43.3839		1.42885	73.0618		1.42885	41.5365		1.42885
	1.42993	51.3731		1.42993	10.9166		1.90657	10.7894		1.42993	21.4909		1.42993	10.4003		1.42993	28.9218		1.42993	27.8671		1.42993	37.7223		1.42993	29.7894		1.42993	19.0682		1.42993	30.5556		1.42993	12.7533		1.42993	11.8368		1.42993	42.9348		1.42993	72.4019		1.42993	41.2173		1.42993
	1.43101	50.9786		1.43101	10.8997		1.90801	10.7194		1.43101	21.3632		1.43101	10.3946		1.43101	28.7224		1.43101	27.6699		1.43101	37.4027		1.43101	29.6		1.43101	18.9772		1.43101	30.3402		1.43101	12.725		1.43101	11.814		1.43101	42.4888		1.43101	71.7421		1.43101	40.8955		1.43101
	1.43209	50.5775		1.43209	10.8827		1.90945	10.6476		1.43209	21.2367		1.43209	10.3887		1.43209	28.5246		1.43209	27.4748		1.43209	37.0836		1.43209	29.4089		1.43209	18.8877		1.43209	30.1255		1.43209	12.6959		1.43209	11.7918		1.43209	42.0474		1.43209	71.0821		1.43209	40.5717		1.43209
	1.43317	50.1696		1.43317	10.8656		1.91089	10.5738		1.43317	21.1127		1.43317	10.3822		1.43317	28.3284		1.43317	27.2824		1.43317	36.7663		1.43317	29.217		1.43317	18.7996		1.43317	29.9121		1.43317	12.6657		1.43317	11.77		1.43317	41.6113		1.43317	70.4219		1.43317	40.2465		1.43317
	1.43425	49.7554		1.43425	10.8489		1.91233	10.4979		1.43425	20.9926		1.43425	10.3746		1.43425	28.1331		1.43425	27.0925		1.43425	36.452		1.43425	29.0253		1.43425	18.712		1.43425	29.7002		1.43425	12.6342		1.43425	11.748		1.43425	41.1806		1.43425	69.7608		1.43425	39.9208		1.43425
	1.43533	49.3364		1.43533	10.8329		1.91377	10.4205		1.43533	20.8773		1.43533	10.3657		1.43533	27.9377		1.43533	26.9042		1.43533	36.1418		1.43533	28.8344		1.43533	18.6233		1.43533	29.49		1.43533	12.6016		1.43533	11.7254		1.43533	40.7545		1.43533	69.0986		1.43533	39.5957		1.43533
	1.43641	48.9147		1.43641	10.8182		1.91521	10.3426		1.43641	20.767		1.43641	10.3555		1.43641	27.7413		1.43641	26.7156		1.43641	35.8362		1.43641	28.6444		1.43641	18.5323		1.43641	29.2813		1.43641	12.568		1.43641	11.7019		1.43641	40.3323		1.43641	68.4355		1.43641	39.2716		1.43641
	1.43749	48.4925		1.43749	10.8049		1.91665	10.2651		1.43749	20.661		1.43749	10.3442		1.43749	27.5435		1.43749	26.5248		1.43749	35.5355		1.43749	28.4554		1.43749	18.4382		1.43749	29.0739		1.43749	12.5336		1.43749	11.6778		1.43749	39.9136		1.43749	67.7717		1.43749	38.9488		1.43749
	1.43857	48.0718		1.43857	10.7927		1.91809	10.1887		1.43857	20.5575		1.43857	10.3318		1.43857	27.3441		1.43857	26.33		1.43857	35.2389		1.43857	28.2677		1.43857	18.3412		1.43857	28.8673		1.43857	12.4989		1.43857	11.6538		1.43857	39.4983		1.43857	67.1068		1.43857	38.6278		1.43857
	1.43965	47.6541		1.43965	10.781		1.91953	10.1143		1.43965	20.4546		1.43965	10.3181		1.43965	27.1435		1.43965	26.1311		1.43965	34.9453		1.43965	28.0817		1.43965	18.2419		1.43965	28.6608		1.43965	12.4649		1.43965	11.6307		1.43965	39.0863		1.43965	66.4406		1.43965	38.3087		1.43965
	1.44073	47.2397		1.44073	10.7697		1.92097	10.0427		1.44073	20.3505		1.44073	10.3029		1.44073	26.9418		1.44073	25.929		1.44073	34.6531		1.44073	27.8973		1.44073	18.1414		1.44073	28.4541		1.44073	12.4326		1.44073	11.6088		1.44073	38.6776		1.44073	65.7729		1.44073	37.9917		1.44073
	1.44181	46.8284		1.44181	10.759		1.92241	9.97429		1.44181	20.2442		1.44181	10.2857		1.44181	26.7399		1.44181	25.7258		1.44181	34.3608		1.44181	27.7141		1.44181	18.0411		1.44181	28.2467		1.44181	12.4032		1.44181	11.5884		1.44181	38.2723		1.44181	65.1046		1.44181	37.6769		1.44181
	1.44289	46.4194		1.44289	10.7491		1.92385	9.90921		1.44289	20.1354		1.44289	10.2664		1.44289	26.539		1.44289	25.5238		1.44289	34.0671		1.44289	27.5314		1.44289	17.9421		1.44289	28.038		1.44289	12.3773		1.44289	11.5693		1.44289	37.8713		1.44289	64.4372		1.44289	37.3637		1.44289
	1.44397	46.012		1.44397	10.7406		1.92529	9.8472		1.44397	20.0244		1.44397	10.2454		1.44397	26.3405		1.44397	25.3248		1.44397	33.771		1.44397	27.3488		1.44397	17.8453		1.44397	27.8274		1.44397	12.3553		1.44397	11.5513		1.44397	37.4753		1.44397	63.7722		1.44397	37.0513		1.44397
	1.44505	45.6056		1.44505	10.7337		1.92673	9.78807		1.44505	19.9113		1.44505	10.2236		1.44505	26.1451		1.44505	25.13		1.44505	33.4723		1.44505	27.1657		1.44505	17.7502		1.44505	27.6145		1.44505	12.337		1.44505	11.5341		1.44505	37.0844		1.44505	63.111		1.44505	36.7394		1.44505
	1.44613	45.1999		1.44613	10.7287		1.92817	9.73174		1.44613	19.7969		1.44613	10.202		1.44613	25.9528		1.44613	24.9402		1.44613	33.1715		1.44613	26.9816		1.44613	17.6555		1.44613	27.3993		1.44613	12.3215		1.44613	11.517		1.44613	36.6979		1.44613	62.4545		1.44613	36.4279		1.44613
	1.44721	44.7946		1.44721	10.726		1.92961	9.67812		1.44721	19.6822		1.44721	10.1817		1.44721	25.7631		1.44721	24.7557		1.44721	32.8697		1.44721	26.7957		1.44721	17.5596		1.44721	27.1819		1.44721	12.3071		1.44721	11.4998		1.44721	36.3147		1.44721	61.8026		1.44721	36.1172		1.44721
	1.44829	44.3898		1.44829	10.7257		1.93105	9.62692		1.44829	19.5686		1.44829	10.1634		1.44829	25.5754		1.44829	24.576		1.44829	32.5686		1.44829	26.6078		1.44829	17.4612		1.44829	26.9628		1.44829	12.2917		1.44829	11.482		1.44829	35.9339		1.44829	61.1545		1.44829	35.8071		1.44829
	1.44937	43.9859		1.44937	10.7273		1.93249	9.57756		1.44937	19.457		1.44937	10.1478		1.44937	25.3897		1.44937	24.4001		1.44937	32.2697		1.44937	26.4185		1.44937	17.3597		1.44937	26.7425		1.44937	12.2736		1.44937	11.4637		1.44937	35.5548		1.44937	60.5085		1.44937	35.4976		1.44937
	1.45045	43.5836		1.45045	10.7298		1.93393	9.52931		1.45045	19.3475		1.45045	10.135		1.45045	25.2061		1.45045	24.2265		1.45045	31.9738		1.45045	26.229		1.45045	17.2555		1.45045	26.5212		1.45045	12.2513		1.45045	11.4447		1.45045	35.1771		1.45045	59.8622		1.45045	35.1886		1.45045
	1.45153	43.1831		1.45153	10.7319		1.93537	9.48153		1.45153	19.2399		1.45153	10.1247		1.45153	25.0246		1.45153	24.0541		1.45153	31.6815		1.45153	26.0406		1.45153	17.1493		1.45153	26.2995		1.45153	12.2247		1.45153	11.4248		1.45153	34.801		1.45153	59.2135		1.45153	34.88		1.45153
	1.45261	42.7841		1.45261	10.7327		1.93681	9.43381		1.45261	19.134		1.45261	10.1163		1.45261	24.8452		1.45261	23.8819		1.45261	31.3931		1.45261	25.8544		1.45261	17.0423		1.45261	26.0777		1.45261	12.1948		1.45261	11.4039		1.45261	34.427		1.45261	58.5608		1.45261	34.5721		1.45261
	1.45369	42.3865		1.45369	10.7322		1.93825	9.38616		1.45369	19.0297		1.45369	10.109		1.45369	24.6681		1.45369	23.7095		1.45369	31.109		1.45369	25.6705		1.45369	16.9362		1.45369	25.8564		1.45369	12.1631		1.45369	11.3817		1.45369	34.0561		1.45369	57.9037		1.45369	34.2644		1.45369
	1.45477	41.9902		1.45477	10.7304		1.93969	9.33893		1.45477	18.9273		1.45477	10.1024		1.45477	24.4936		1.45477	23.5362		1.45477	30.8292		1.45477	25.4887		1.45477	16.8327		1.45477	25.6361		1.45477	12.1318		1.45477	11.358		1.45477	33.6897		1.45477	57.2434		1.45477	33.9566		1.45477
	1.45585	41.5958		1.45585	10.7274		1.94113	9.29265		1.45585	18.8266		1.45585	10.0961		1.45585	24.3225		1.45585	23.3616		1.45585	30.5538		1.45585	25.3082		1.45585	16.7328		1.45585	25.417		1.45585	12.1026		1.45585	11.3328		1.45585	33.3295		1.45585	56.5832		1.45585	33.648		1.45585
	1.45693	41.2039		1.45693	10.7234		1.94257	9.24794		1.45693	18.7272		1.45693	10.09		1.45693	24.1548		1.45693	23.185		1.45693	30.2825		1.45693	25.1282		1.45693	16.6368		1.45693	25.1991		1.45693	12.0768		1.45693	11.3065		1.45693	32.9764		1.45693	55.9266		1.45693	33.3387		1.45693
	1.45801	40.8149		1.45801	10.719		1.94401	9.20539		1.45801	18.6282		1.45801	10.084		1.45801	23.9897		1.45801	23.006		1.45801	30.0149		1.45801	24.9476		1.45801	16.5441		1.45801	24.9825		1.45801	12.0547		1.45801	11.2797		1.45801	32.6307		1.45801	55.2774		1.45801	33.0297		1.45801
	1.45909	40.4283		1.45909	10.7151		1.94545	9.16559		1.45909	18.5297		1.45909	10.0777		1.45909	23.8258		1.45909	22.8249		1.45909	29.7511		1.45909	24.7657		1.45909	16.4535		1.45909	24.7672		1.45909	12.0359		1.45909	11.2535		1.45909	32.2915		1.45909	54.638		1.45909	32.7221		1.45909
	1.46017	40.043		1.46017	10.7123		1.94689	9.12879		1.46017	18.4319		1.46017	10.0708		1.46017	23.6616		1.46017	22.6426		1.46017	29.4909		1.46017	24.582		1.46017	16.3638		1.46017	24.5537		1.46017	12.0192		1.46017	11.2288		1.46017	31.958		1.46017	54.0097		1.46017	32.4168		1.46017
	1.46125	39.6585		1.46125	10.7107		1.94833	9.09467		1.46125	18.3346		1.46125	10.0629		1.46125	23.4965		1.46125	22.4607		1.46125	29.234		1.46125	24.3973		1.46125	16.2743		1.46125	24.3423		1.46125	12.0029		1.46125	11.2067		1.46125	31.6292		1.46125	53.3925		1.46125	32.1143		1.46125
	1.46233	39.2742		1.46233	10.7096		1.94977	9.06219		1.46233	18.2377		1.46233	10.0538		1.46233	23.3304		1.46233	22.2814		1.46233	28.9799		1.46233	24.2127		1.46233	16.1843		1.46233	24.1335		1.46233	11.9857		1.46233	11.1876		1.46233	31.3048		1.46233	52.7852		1.46233	31.8148		1.46233
	1.46341	38.8898		1.46341	10.7082		1.95121	9.03005		1.46341	18.1408		1.46341	10.0432		1.46341	23.1634		1.46341	22.1063		1.46341	28.7273		1.46341	24.0297		1.46341	16.094		1.46341	23.9275		1.46341	11.9671		1.46341	11.1716		1.46341	30.9845		1.46341	52.1862		1.46341	31.518		1.46341
	1.46449	38.505		1.46449	10.7062		1.95265	8.99716		1.46449	18.0435		1.46449	10.0313		1.46449	22.9958		1.46449	21.9368		1.46449	28.4752		1.46449	23.85		1.46449	16.0033		1.46449	23.7247		1.46449	11.9473		1.46449	11.1578		1.46449	30.6682		1.46449	51.5931		1.46449	31.2239		1.46449
	1.46557	38.1196		1.46557	10.7035		1.95409	8.96304		1.46557	17.9463		1.46557	10.0187		1.46557	22.828		1.46557	21.7736		1.46557	28.2229		1.46557	23.6743		1.46557	15.9121		1.46557	23.526		1.46557	11.927		1.46557	11.1448		1.46557	30.3558		1.46557	51.0044		1.46557	30.9317		1.46557
	1.46665	37.7345		1.46665	10.6999		1.95553	8.92767		1.46665	17.8491		1.46665	10.0061		1.46665	22.6609		1.46665	21.6171		1.46665	27.9703		1.46665	23.5027		1.46665	15.8203		1.46665	23.3319		1.46665	11.9074		1.46665	11.1311		1.46665	30.0481		1.46665	50.419		1.46665	30.6407		1.46665
	1.46773	37.3515		1.46773	10.6949		1.95697	8.89125		1.46773	17.7514		1.46773	9.99473		1.46773	22.4956		1.46773	21.4671		1.46773	27.7176		1.46773	23.3347		1.46773	15.7279		1.46773	23.1428		1.46773	11.8891		1.46773	11.1153		1.46773	29.7457		1.46773	49.8368		1.46773	30.3504		1.46773
	1.46881	36.9728		1.46881	10.6884		1.95841	8.85406		1.46881	17.6523		1.46881	9.98533		1.46881	22.3327		1.46881	21.3223		1.46881	27.4652		1.46881	23.1697		1.46881	15.6347		1.46881	22.9581		1.46881	11.8725		1.46881	11.0965		1.46881	29.4492		1.46881	49.258		1.46881	30.0611		1.46881
	1.46989	36.6001		1.46989	10.6812		1.95985	8.81649		1.46989	17.5513		1.46989	9.97848		1.46989	22.1724		1.46989	21.1806		1.46989	27.2137		1.46989	23.0067		1.46989	15.5404		1.46989	22.777		1.46989	11.8575		1.46989	11.0744		1.46989	29.1585		1.46989	48.6833		1.46989	29.7736		1.46989
	1.47097	36.2343		1.47097	10.6744		1.96129	8.77904		1.47097	17.4485		1.47097	9.97426		1.47097	22.0147		1.47097	21.0398		1.47097	26.9642		1.47097	22.8455		1.47097	15.4445		1.47097	22.5986		1.47097	11.8435		1.47097	11.0492		1.47097	28.8726		1.47097	48.1131		1.47097	29.4889		1.47097
	1.47205	35.8752		1.47205	10.669		1.96273	8.74213		1.47205	17.3444		1.47205	9.97232		1.47205	21.8595		1.47205	20.8983		1.47205	26.7183		1.47205	22.6858		1.47205	15.3464		1.47205	22.4224		1.47205	11.8296		1.47205	11.0218		1.47205	28.5903		1.47205	47.5472		1.47205	29.2079		1.47205
	1.47313	35.5225		1.47313	10.6653		1.96417	8.7059		1.47313	17.2396		1.47313	9.9718		1.47313	21.707		1.47313	20.7556		1.47313	26.4776		1.47313	22.5279		1.47313	15.2468		1.47313	22.2482		1.47313	11.8146		1.47313	10.9939		1.47313	28.3103		1.47313	46.9858		1.47313	28.9309		1.47313
	1.47421	35.1754		1.47421	10.6631		1.96561	8.67032		1.47421	17.135		1.47421	9.97153		1.47421	21.5572		1.47421	20.612		1.47421	26.2436		1.47421	22.3723		1.47421	15.1469		1.47421	22.0759		1.47421	11.7977		1.47421	10.9671		1.47421	28.0321		1.47421	46.4293		1.47421	28.6581		1.47421
[truncated: 2,801 more rows]
[truncated: 17 more columns]
