# Supplementary material for: Structures of ferroportin in complex with its specific inhibitor vamifeport
Source: eLife journal article supplement (doi:10.7554/elife.83053), 2023-02-28
Supplement: fig5-figsupp2-data1 [file Figure5_supplement2.xlsx]

## Sheet: Sheet1
		Fluorescence polarization
	FPN conc (uM)	FPN V68A			FPN R466A			FPN L469A			FPN L469S			FPN W470S			FPN Y501S			FPN D504			WT + 30uM vamifeport
	6	343.1	343.6	339.8	354	348.1	352.9	385.4	386.6	388.6	376.8	371.7	375.4	360.9	358.8	357	291.6	292.7	290.2	270.8	277.6	270.3	312.785	302.149	307.663
	3.429	308.7	309	310.2	328.6	335.3	333.4	373.5	375.8	383.6	364.6	357.7	367.2	350.4	348.5	347.1	253	254.7	254.2	240.8	242.8	237.2	272.358	272.029	275.703
	1.959	281.1	283.4	286.3	310.4	309.4	313.1	364.3	365.7	367.1	351.1	350.9	346.1	342.2	335.5	330.2	223.6	231.1	227.7	217.4	215	213	241.822	243.721	241.974
	1.12	260	260.3	254.7	288.8	284.1	290	348.2	358	351.5	337	326	338.9	316	316	318.2	206.5	207.5	207.1	190.8	196.7	202.3	220.887	222.467	217.665
	0.64	238.3	235.7	234.5	262.7	268.6	267.9	337.8	345.2	343.6	324.2	321.5	322.7	297.9	298.2	303.2	185.2	191.9	193.3	183.8	182.9	190.3	200.026	201.689	202.747
	0.366	219.1	224.5	226.2	240.3	249.1	253	321.3	328.9	326.1	306.7	302.7	309.4	281.1	275.3	280.9	187.2	180	180.7	180.8	185.5	189.9	187.083	189.905	182.206
	0.209	204.6	200.4	198.3	226.9	229.3	227	311.2	317	318.6	299.2	286.9	291.8	255.7	247.7	246.5	180.9	175.8	180.7	181	179.2	184.2	179.393	186.435	184.133
	0.119	198.7	192.5	192.9	208.2	203.4	213.1	291.1	294	290.2	276.2	272.8	272	234	233.6	233.8	174.1	171.3	174.1	173.8	170.3	168	180.876	174.137	181.56
	0.068	183.9	185	185.7	193	192.9	177.8	266.7	267.9	269.7	244.5	246.5	255.1	220.9	214.7	222.4	181	182.3	178.4	176.1	172	172.6	170.77	175.589	165.196
	0.039	175.5	184.5	188.1	184.5	187.4	191.6	238	248.5	249.8	225.8	225.6	231.1	206.9	194.3	202.5	165.8	176.3	169.9	169.3	172.1	174.2	173.471	169.366	168.897
	0.022	174.5	175.5	180.6	180.1	183.7	177.2	219.2	221.8	218	206	198.2	202.1	185.8	181.9	182.9	178.5	169.1	171.2	171.1	170.6	171.2	173.252	164.996	164.858
	0.013	177.6	182.6	175.9	180.3	181.6	181.7	196.7	192.2	188	196.2	184.2	186.6	179.9	175.6	176.2	173.5	168.5	166.4	166.5	172.7	174.3	170.851	167.532	167.652
		parallel Fluorescence
		55091	52141	50839	53919	51075	48738	53704	51735	50063	48527	51966	49156	54802	53427	49984	59612	57408	57029	57971	55424	55177	44396	47570	46958
		49815	47537	48356	49043	47204	47895	49303	47559	48899	48747	46855	48358	50022	49369	49868	56833	54155	56111	55319	52836	53793	42837	45462	48945
		47810	45487	45891	47262	45523	45474	48577	47590	46556	48700	47904	46737	50218	49859	48244	53898	53022	53499	53873	51651	52071	48989	47209	47682
		46338	43436	43086	45974	43533	43060	45494	46577	45723	48149	46361	45509	48397	48402	46706	53789	52200	51638	53220	50680	50909	49196	47914	48125
		42746	40322	40850	42763	40998	41086	45433	44482	43797	45560	44931	43546	46834	46518	45411	51097	49679	48918	51430	48490	49225	48066	46930	46774
		41651	40093	39939	41464	40632	39602	44941	44322	43065	45635	45103	43206	46431	46867	44405	51849	50218	48702	52272	49904	49635	49188	47638	48147
		40105	38014	38523	40081	38826	38942	43893	42934	42857	44013	43600	42357	44719	44958	43538	49610	48983	48170	50749	48345	49391	48469	46806	47324
		39300	37232	37705	39119	37689	38078	42631	41572	41517	43223	42559	42019	43902	44701	42813	49081	46722	46700	50205	47981	47926	48334	47234	47176
		38541	36284	37485	38376	36524	40292	41160	40335	40767	41679	40920	41664	42560	43134	42562	47475	46641	46785	48936	46652	47250	46586	45547	46618
		38249	36894	37204	38527	37702	37046	41000	40749	40063	41924	41593	40646	42628	43516	41728	47020	46013	45420	48278	46258	45304	48632	47039	45329
		38509	37340	38570	38893	37757	38771	41103	40334	41151	41069	40837	41376	42671	43134	42872	46267	45124	45791	46817	45420	46170	46849	46006	46861
		37114	38685	39173	37093	39110	39856	38690	40518	41174	39162	41451	42361	43538	43014	43418	44790	44585	42996	45406	45679	44031	46320	45538	45388
		perpendicular Fluorescence
		26943	25471	25053	25725	24699	23312	23824	22888	22042	21968	23800	22321	25734	25212	23684	32695	31411	31374	33263	31342	31695	23261	25208	25188
		26315	25092	25461	24781	23498	23942	22487	21576	21786	22697	22167	22383	24060	23854	24170	33885	32171	33367	33846	32192	33163	24519	25834	28035
		26827	25398	25463	24869	24010	23788	22633	22104	21553	23389	23016	22702	24614	24809	24293	34203	33118	33655	34630	33372	33781	29935	28838	29019
		27212	25492	25593	25371	24272	23702	21994	22021	21938	23874	23563	22473	25155	25157	24155	35373	34260	33922	36165	34018	33775	31421	30810	30635
		26295	24939	25333	24968	23637	23726	22489	21650	21398	23251	23071	22300	25334	25146	24281	35126	33679	33067	35459	33493	33485	32069	31134	31099
		26677	25394	25206	25397	24425	23610	23087	22381	21887	24215	24142	22789	26056	26633	24927	35496	34900	33796	36267	34288	33793	33712	32981	32806
		26483	25320	25772	25257	24343	24534	23058	22268	22149	23741	24160	23219	26509	27109	26321	34410	34339	33427	35192	33652	34023	33752	32276	32478
		26272	25212	25512	25638	24948	24702	23405	22681	22842	24512	24317	24048	27250	27774	26589	34523	33054	32849	35336	34015	34142	33555	32745	33210
		26565	24954	25746	25958	24713	28127	23829	23288	23447	25301	24737	24725	27157	27885	27076	32925	32255	32619	34278	32961	33339	33023	32659	32719
		26826	25400	25423	26524	25804	25132	25236	24526	24050	26481	26281	25386	28014	29354	27676	33645	32219	32225	34296	32676	31862	34282	33473	32225
		27067	26190	26772	27022	26040	27099	26321	25689	26421	27036	27328	27463	29301	29855	29617	32250	32069	32407	33137	32183	32672	33040	33011	33615
		25919	26741	27451	25759	27091	27597	25972	27452	28142	26318	28555	29040	30261	30166	30408	31546	31725	30731	32441	32226	30963	32829	32488	32389
